# Supplementary material for: A systematic genome-wide mapping of oncogenic mutation selection during CRISPR-Cas9 genome editing
Source: Research Square preprint supplement (doi:10.21203/rs.3.rs-199044/v1), 2021-02-10
Supplement: Supplementary file 2 [file 284a062b856395d0ad9ac8b7.xlsx]

## Sheet: readme
This document contains the data for CRISPR-KO and CRISPRi screens of CDE genes in p53 isogenic MOLM13 cell lines.
Worksheet A: CRISPR-KO data
Worksheet B: CRISPRi data
Group names:
D0_MNC1, D0_MNC2: two replicates of Day 0 in p53 wildtype cells
D30_MNC1, D30_MNC2: two replicates of Day 30 in p53 wildtype cells
D0_MUT1, D0_MUT2: two replicates of Day 0 in p53 mutant cells
D30_MUT1, D30_MUT2: two replicates of Day 30 in p53 mutant cells

## Sheet: A_CRISPR-KO
D0_MNC1						D0_MNC2						D30_MNC1						D30_MNC2						D0_MUT1						D0_MUT2						D30_MUT1						D30_MUT2
Gene	sgRNA	Count	cpm	CDE Group		Gene	sgRNA	Count	cpm	Gene group		Gene	sgRNA	Count	cpm	Gene group		Gene	sgRNA	Count	cpm	Gene group		Gene	sgRNA	Count	cpm	CDE Group		Gene	sgRNA	Count	cpm	CDE Group		Gene	sgRNA	Count	cpm	CDE Group		Gene	sgRNA	Count	cpm	CDE Group
ABCG2	GTTGGAACTCAGTTTATCCG	14	71.7654	p53 CDE Neutral		ABCG2	GTTGGAACTCAGTTTATCCG	42	161.091	p53 CDE Neutral		ABCG2	GTTGGAACTCAGTTTATCCG	53	147.957	p53 CDE Neutral		ABCG2	GTTGGAACTCAGTTTATCCG	35	140.192	p53 CDE Neutral		ABCG2	GTTGGAACTCAGTTTATCCG	70	189.771	p53 CDE Neutral		ABCG2	GTTGGAACTCAGTTTATCCG	21	121.941	p53 CDE Neutral		ABCG2	GTTGGAACTCAGTTTATCCG	20	73.1695	p53 CDE Neutral		ABCG2	GTTGGAACTCAGTTTATCCG	63	197.879	p53 CDE Neutral
ABCG2	TGTCCAAGAAGAAGTCTGCA	63	322.944	p53 CDE Neutral		ABCG2	TGTCCAAGAAGAAGTCTGCA	111	425.739	p53 CDE Neutral		ABCG2	TGTCCAAGAAGAAGTCTGCA	157	438.288	p53 CDE Neutral		ABCG2	TGTCCAAGAAGAAGTCTGCA	74	296.405	p53 CDE Neutral		ABCG2	TGTCCAAGAAGAAGTCTGCA	147	398.52	p53 CDE Neutral		ABCG2	TGTCCAAGAAGAAGTCTGCA	76	441.309	p53 CDE Neutral		ABCG2	TGTCCAAGAAGAAGTCTGCA	109	398.774	p53 CDE Neutral		ABCG2	TGTCCAAGAAGAAGTCTGCA	228	716.132	p53 CDE Neutral
ABCG2	TTTCTCCTCCAGACACACCA	43	220.422	p53 CDE Neutral		ABCG2	TTTCTCCTCCAGACACACCA	41	157.255	p53 CDE Neutral		ABCG2	TTTCTCCTCCAGACACACCA	37	103.291	p53 CDE Neutral		ABCG2	TTTCTCCTCCAGACACACCA	32	128.175	p53 CDE Neutral		ABCG2	TTTCTCCTCCAGACACACCA	44	119.285	p53 CDE Neutral		ABCG2	TTTCTCCTCCAGACACACCA	25	145.167	p53 CDE Neutral		ABCG2	TTTCTCCTCCAGACACACCA	11	40.2432	p53 CDE Neutral		ABCG2	TTTCTCCTCCAGACACACCA	25	78.5233	p53 CDE Neutral
ABCG2	AACACTGCTGAAACACTGGT	42	215.296	p53 CDE Neutral		ABCG2	AACACTGCTGAAACACTGGT	49	187.939	p53 CDE Neutral		ABCG2	AACACTGCTGAAACACTGGT	73	203.79	p53 CDE Neutral		ABCG2	AACACTGCTGAAACACTGGT	89	356.488	p53 CDE Neutral		ABCG2	AACACTGCTGAAACACTGGT	76	206.037	p53 CDE Neutral		ABCG2	AACACTGCTGAAACACTGGT	28	162.587	p53 CDE Neutral		ABCG2	AACACTGCTGAAACACTGGT	3	10.9754	p53 CDE Neutral		ABCG2	AACACTGCTGAAACACTGGT	11	34.5502	p53 CDE Neutral
ABCG2	ATGGCACTGGCCATAGCAGC	14	71.7654	p53 CDE Neutral		ABCG2	ATGGCACTGGCCATAGCAGC	17	65.2033	p53 CDE Neutral		ABCG2	ATGGCACTGGCCATAGCAGC	42	117.249	p53 CDE Neutral		ABCG2	ATGGCACTGGCCATAGCAGC	7	28.0384	p53 CDE Neutral		ABCG2	ATGGCACTGGCCATAGCAGC	31	84.0416	p53 CDE Neutral		ABCG2	ATGGCACTGGCCATAGCAGC	8	46.4536	p53 CDE Neutral		ABCG2	ATGGCACTGGCCATAGCAGC	19	69.511	p53 CDE Neutral		ABCG2	ATGGCACTGGCCATAGCAGC	25	78.5233	p53 CDE Neutral
ABCG2	CATAGCAGCAGGTCAGAGTG	89	456.223	p53 CDE Neutral		ABCG2	CATAGCAGCAGGTCAGAGTG	80	306.839	p53 CDE Neutral		ABCG2	CATAGCAGCAGGTCAGAGTG	141	393.622	p53 CDE Neutral		ABCG2	CATAGCAGCAGGTCAGAGTG	38	152.208	p53 CDE Neutral		ABCG2	CATAGCAGCAGGTCAGAGTG	140	379.543	p53 CDE Neutral		ABCG2	CATAGCAGCAGGTCAGAGTG	72	418.082	p53 CDE Neutral		ABCG2	CATAGCAGCAGGTCAGAGTG	49	179.265	p53 CDE Neutral		ABCG2	CATAGCAGCAGGTCAGAGTG	89	279.543	p53 CDE Neutral
ABCG2	CTCTACCACAAAGAGTTCCA	33	169.161	p53 CDE Neutral		ABCG2	CTCTACCACAAAGAGTTCCA	42	161.091	p53 CDE Neutral		ABCG2	CTCTACCACAAAGAGTTCCA	27	75.3744	p53 CDE Neutral		ABCG2	CTCTACCACAAAGAGTTCCA	17	68.0932	p53 CDE Neutral		ABCG2	CTCTACCACAAAGAGTTCCA	60	162.661	p53 CDE Neutral		ABCG2	CTCTACCACAAAGAGTTCCA	44	255.495	p53 CDE Neutral		ABCG2	CTCTACCACAAAGAGTTCCA	5	18.2924	p53 CDE Neutral		ABCG2	CTCTACCACAAAGAGTTCCA	0	0	p53 CDE Neutral
ABCG2	CTGAAACACTGCTGAAACAC	22	112.774	p53 CDE Neutral		ABCG2	CTGAAACACTGCTGAAACAC	23	88.2162	p53 CDE Neutral		ABCG2	CTGAAACACTGCTGAAACAC	33	92.1242	p53 CDE Neutral		ABCG2	CTGAAACACTGCTGAAACAC	42	168.23	p53 CDE Neutral		ABCG2	CTGAAACACTGCTGAAACAC	47	127.418	p53 CDE Neutral		ABCG2	CTGAAACACTGCTGAAACAC	15	87.1004	p53 CDE Neutral		ABCG2	CTGAAACACTGCTGAAACAC	42	153.656	p53 CDE Neutral		ABCG2	CTGAAACACTGCTGAAACAC	32	100.51	p53 CDE Neutral
ABCG2	GATGTTTACCCTTATGATGG	88	451.097	p53 CDE Neutral		ABCG2	GATGTTTACCCTTATGATGG	104	398.891	p53 CDE Neutral		ABCG2	GATGTTTACCCTTATGATGG	129	360.122	p53 CDE Neutral		ABCG2	GATGTTTACCCTTATGATGG	62	248.34	p53 CDE Neutral		ABCG2	GATGTTTACCCTTATGATGG	145	393.098	p53 CDE Neutral		ABCG2	GATGTTTACCCTTATGATGG	73	423.889	p53 CDE Neutral		ABCG2	GATGTTTACCCTTATGATGG	72	263.41	p53 CDE Neutral		ABCG2	GATGTTTACCCTTATGATGG	90	282.684	p53 CDE Neutral
ABCG2	GGTCATTGGAAGCTGTCGCG	36	184.54	p53 CDE Neutral		ABCG2	GGTCATTGGAAGCTGTCGCG	57	218.623	p53 CDE Neutral		ABCG2	GGTCATTGGAAGCTGTCGCG	140	390.83	p53 CDE Neutral		ABCG2	GGTCATTGGAAGCTGTCGCG	80	320.438	p53 CDE Neutral		ABCG2	GGTCATTGGAAGCTGTCGCG	78	211.459	p53 CDE Neutral		ABCG2	GGTCATTGGAAGCTGTCGCG	46	267.108	p53 CDE Neutral		ABCG2	GGTCATTGGAAGCTGTCGCG	11	40.2432	p53 CDE Neutral		ABCG2	GGTCATTGGAAGCTGTCGCG	10	31.4093	p53 CDE Neutral
ACVR1B	AATAATCTCTTGTAAAACGA	41	210.17	p53 CDE Neutral		ACVR1B	AATAATCTCTTGTAAAACGA	32	122.736	p53 CDE Neutral		ACVR1B	AATAATCTCTTGTAAAACGA	31	86.5409	p53 CDE Neutral		ACVR1B	AATAATCTCTTGTAAAACGA	35	140.192	p53 CDE Neutral		ACVR1B	AATAATCTCTTGTAAAACGA	53	143.684	p53 CDE Neutral		ACVR1B	AATAATCTCTTGTAAAACGA	30	174.201	p53 CDE Neutral		ACVR1B	AATAATCTCTTGTAAAACGA	12	43.9017	p53 CDE Neutral		ACVR1B	AATAATCTCTTGTAAAACGA	17	53.3958	p53 CDE Neutral
ACVR1B	ACTGTGCGCTGGACAAAGAG	34	174.287	p53 CDE Neutral		ACVR1B	ACTGTGCGCTGGACAAAGAG	38	145.749	p53 CDE Neutral		ACVR1B	ACTGTGCGCTGGACAAAGAG	95	265.206	p53 CDE Neutral		ACVR1B	ACTGTGCGCTGGACAAAGAG	36	144.197	p53 CDE Neutral		ACVR1B	ACTGTGCGCTGGACAAAGAG	34	92.1746	p53 CDE Neutral		ACVR1B	ACTGTGCGCTGGACAAAGAG	20	116.134	p53 CDE Neutral		ACVR1B	ACTGTGCGCTGGACAAAGAG	7	25.6093	p53 CDE Neutral		ACVR1B	ACTGTGCGCTGGACAAAGAG	0	0	p53 CDE Neutral
ACVR1B	ATGGCACCTGGACACAGCTG	94	481.854	p53 CDE Neutral		ACVR1B	ATGGCACCTGGACACAGCTG	155	594.501	p53 CDE Neutral		ACVR1B	ATGGCACCTGGACACAGCTG	141	393.622	p53 CDE Neutral		ACVR1B	ATGGCACCTGGACACAGCTG	183	733.003	p53 CDE Neutral		ACVR1B	ATGGCACCTGGACACAGCTG	193	523.227	p53 CDE Neutral		ACVR1B	ATGGCACCTGGACACAGCTG	85	493.569	p53 CDE Neutral		ACVR1B	ATGGCACCTGGACACAGCTG	32	117.071	p53 CDE Neutral		ACVR1B	ATGGCACCTGGACACAGCTG	77	241.852	p53 CDE Neutral
ACVR1B	CCACATCACCACCCCTCCAG	72	369.079	p53 CDE Neutral		ACVR1B	CCACATCACCACCCCTCCAG	89	341.358	p53 CDE Neutral		ACVR1B	CCACATCACCACCCCTCCAG	111	309.872	p53 CDE Neutral		ACVR1B	CCACATCACCACCCCTCCAG	104	416.57	p53 CDE Neutral		ACVR1B	CCACATCACCACCCCTCCAG	128	347.01	p53 CDE Neutral		ACVR1B	CCACATCACCACCCCTCCAG	35	203.234	p53 CDE Neutral		ACVR1B	CCACATCACCACCCCTCCAG	19	69.511	p53 CDE Neutral		ACVR1B	CCACATCACCACCCCTCCAG	13	40.8321	p53 CDE Neutral
ACVR1B	CCACTGTGCGCTGGACAAAG	40	205.044	p53 CDE Neutral		ACVR1B	CCACTGTGCGCTGGACAAAG	75	287.662	p53 CDE Neutral		ACVR1B	CCACTGTGCGCTGGACAAAG	108	301.497	p53 CDE Neutral		ACVR1B	CCACTGTGCGCTGGACAAAG	37	148.203	p53 CDE Neutral		ACVR1B	CCACTGTGCGCTGGACAAAG	73	197.904	p53 CDE Neutral		ACVR1B	CCACTGTGCGCTGGACAAAG	34	197.428	p53 CDE Neutral		ACVR1B	CCACTGTGCGCTGGACAAAG	20	73.1695	p53 CDE Neutral		ACVR1B	CCACTGTGCGCTGGACAAAG	66	207.301	p53 CDE Neutral
ACVR1B	CCGGTACACAGTGACAATTG	22	112.774	p53 CDE Neutral		ACVR1B	CCGGTACACAGTGACAATTG	21	80.5453	p53 CDE Neutral		ACVR1B	CCGGTACACAGTGACAATTG	23	64.2078	p53 CDE Neutral		ACVR1B	CCGGTACACAGTGACAATTG	33	132.181	p53 CDE Neutral		ACVR1B	CCGGTACACAGTGACAATTG	59	159.95	p53 CDE Neutral		ACVR1B	CCGGTACACAGTGACAATTG	25	145.167	p53 CDE Neutral		ACVR1B	CCGGTACACAGTGACAATTG	3	10.9754	p53 CDE Neutral		ACVR1B	CCGGTACACAGTGACAATTG	12	37.6912	p53 CDE Neutral
ACVR1B	GGAAGCAGAGATATACCAGA	51	261.431	p53 CDE Neutral		ACVR1B	GGAAGCAGAGATATACCAGA	95	364.371	p53 CDE Neutral		ACVR1B	GGAAGCAGAGATATACCAGA	98	273.581	p53 CDE Neutral		ACVR1B	GGAAGCAGAGATATACCAGA	59	236.323	p53 CDE Neutral		ACVR1B	GGAAGCAGAGATATACCAGA	108	292.79	p53 CDE Neutral		ACVR1B	GGAAGCAGAGATATACCAGA	75	435.502	p53 CDE Neutral		ACVR1B	GGAAGCAGAGATATACCAGA	70	256.093	p53 CDE Neutral		ACVR1B	GGAAGCAGAGATATACCAGA	74	232.429	p53 CDE Neutral
ACVR1B	GTAGTCAGTGTAGCAGCAGT	149	763.789	p53 CDE Neutral		ACVR1B	GTAGTCAGTGTAGCAGCAGT	119	456.423	p53 CDE Neutral		ACVR1B	GTAGTCAGTGTAGCAGCAGT	177	494.121	p53 CDE Neutral		ACVR1B	GTAGTCAGTGTAGCAGCAGT	109	436.597	p53 CDE Neutral		ACVR1B	GTAGTCAGTGTAGCAGCAGT	198	536.782	p53 CDE Neutral		ACVR1B	GTAGTCAGTGTAGCAGCAGT	128	743.257	p53 CDE Neutral		ACVR1B	GTAGTCAGTGTAGCAGCAGT	40	146.339	p53 CDE Neutral		ACVR1B	GTAGTCAGTGTAGCAGCAGT	62	194.738	p53 CDE Neutral
ACVR1B	TCCGAGCTCAGGCAGTAGAA	29	148.657	p53 CDE Neutral		ACVR1B	TCCGAGCTCAGGCAGTAGAA	36	138.078	p53 CDE Neutral		ACVR1B	TCCGAGCTCAGGCAGTAGAA	60	167.499	p53 CDE Neutral		ACVR1B	TCCGAGCTCAGGCAGTAGAA	48	192.263	p53 CDE Neutral		ACVR1B	TCCGAGCTCAGGCAGTAGAA	112	303.634	p53 CDE Neutral		ACVR1B	TCCGAGCTCAGGCAGTAGAA	43	249.688	p53 CDE Neutral		ACVR1B	TCCGAGCTCAGGCAGTAGAA	53	193.899	p53 CDE Neutral		ACVR1B	TCCGAGCTCAGGCAGTAGAA	18	56.5367	p53 CDE Neutral
ACVR1B	TGTCAGTGACTGCATCATGA	89	456.223	p53 CDE Neutral		ACVR1B	TGTCAGTGACTGCATCATGA	175	671.21	p53 CDE Neutral		ACVR1B	TGTCAGTGACTGCATCATGA	95	265.206	p53 CDE Neutral		ACVR1B	TGTCAGTGACTGCATCATGA	65	260.356	p53 CDE Neutral		ACVR1B	TGTCAGTGACTGCATCATGA	182	493.405	p53 CDE Neutral		ACVR1B	TGTCAGTGACTGCATCATGA	87	505.182	p53 CDE Neutral		ACVR1B	TGTCAGTGACTGCATCATGA	124	453.651	p53 CDE Neutral		ACVR1B	TGTCAGTGACTGCATCATGA	94	295.247	p53 CDE Neutral
AFM	AAATCTTGAGAGAAAGGTGG	43	220.422	p53 CDE Neg		AFM	AAATCTTGAGAGAAAGGTGG	72	276.155	p53 CDE Neg		AFM	AAATCTTGAGAGAAAGGTGG	45	125.624	p53 CDE Neg		AFM	AAATCTTGAGAGAAAGGTGG	25	100.137	p53 CDE Neg		AFM	AAATCTTGAGAGAAAGGTGG	116	314.478	p53 CDE Neg		AFM	AAATCTTGAGAGAAAGGTGG	56	325.175	p53 CDE Neg		AFM	AAATCTTGAGAGAAAGGTGG	216	790.23	p53 CDE Neg		AFM	AAATCTTGAGAGAAAGGTGG	212	665.877	p53 CDE Neg
AFM	AAGAGACACCAGTTCTTCAG	45	230.675	p53 CDE Neg		AFM	AAGAGACACCAGTTCTTCAG	52	199.445	p53 CDE Neg		AFM	AAGAGACACCAGTTCTTCAG	175	488.538	p53 CDE Neg		AFM	AAGAGACACCAGTTCTTCAG	64	256.351	p53 CDE Neg		AFM	AAGAGACACCAGTTCTTCAG	79	214.17	p53 CDE Neg		AFM	AAGAGACACCAGTTCTTCAG	45	261.301	p53 CDE Neg		AFM	AAGAGACACCAGTTCTTCAG	39	142.68	p53 CDE Neg		AFM	AAGAGACACCAGTTCTTCAG	14	43.973	p53 CDE Neg
AFM	AATAAATCTTGAGAGAAAGG	66	338.323	p53 CDE Neg		AFM	AATAAATCTTGAGAGAAAGG	139	533.133	p53 CDE Neg		AFM	AATAAATCTTGAGAGAAAGG	209	583.453	p53 CDE Neg		AFM	AATAAATCTTGAGAGAAAGG	94	376.515	p53 CDE Neg		AFM	AATAAATCTTGAGAGAAAGG	146	395.809	p53 CDE Neg		AFM	AATAAATCTTGAGAGAAAGG	80	464.536	p53 CDE Neg		AFM	AATAAATCTTGAGAGAAAGG	36	131.705	p53 CDE Neg		AFM	AATAAATCTTGAGAGAAAGG	77	241.852	p53 CDE Neg
AFM	AATTTCTTACCTATATCCCG	109	558.745	p53 CDE Neg		AFM	AATTTCTTACCTATATCCCG	175	671.21	p53 CDE Neg		AFM	AATTTCTTACCTATATCCCG	177	494.121	p53 CDE Neg		AFM	AATTTCTTACCTATATCCCG	120	480.658	p53 CDE Neg		AFM	AATTTCTTACCTATATCCCG	227	615.401	p53 CDE Neg		AFM	AATTTCTTACCTATATCCCG	74	429.695	p53 CDE Neg		AFM	AATTTCTTACCTATATCCCG	38	139.022	p53 CDE Neg		AFM	AATTTCTTACCTATATCCCG	50	157.047	p53 CDE Neg
AFM	ACTGAAGAACTGGTGTCTCT	39	199.918	p53 CDE Neg		AFM	ACTGAAGAACTGGTGTCTCT	39	149.584	p53 CDE Neg		AFM	ACTGAAGAACTGGTGTCTCT	79	220.54	p53 CDE Neg		AFM	ACTGAAGAACTGGTGTCTCT	32	128.175	p53 CDE Neg		AFM	ACTGAAGAACTGGTGTCTCT	84	227.726	p53 CDE Neg		AFM	ACTGAAGAACTGGTGTCTCT	22	127.747	p53 CDE Neg		AFM	ACTGAAGAACTGGTGTCTCT	0	0	p53 CDE Neg		AFM	ACTGAAGAACTGGTGTCTCT	16	50.2549	p53 CDE Neg
AFM	AGTCAACTGCCTTCAAACAA	41	210.17	p53 CDE Neg		AFM	AGTCAACTGCCTTCAAACAA	65	249.307	p53 CDE Neg		AFM	AGTCAACTGCCTTCAAACAA	220	614.161	p53 CDE Neg		AFM	AGTCAACTGCCTTCAAACAA	135	540.74	p53 CDE Neg		AFM	AGTCAACTGCCTTCAAACAA	87	235.859	p53 CDE Neg		AFM	AGTCAACTGCCTTCAAACAA	34	197.428	p53 CDE Neg		AFM	AGTCAACTGCCTTCAAACAA	95	347.555	p53 CDE Neg		AFM	AGTCAACTGCCTTCAAACAA	143	449.153	p53 CDE Neg
AFM	CATGTGTCAATCTCAGAATG	67	343.449	p53 CDE Neg		AFM	CATGTGTCAATCTCAGAATG	88	337.523	p53 CDE Neg		AFM	CATGTGTCAATCTCAGAATG	154	429.913	p53 CDE Neg		AFM	CATGTGTCAATCTCAGAATG	43	172.236	p53 CDE Neg		AFM	CATGTGTCAATCTCAGAATG	106	287.368	p53 CDE Neg		AFM	CATGTGTCAATCTCAGAATG	38	220.654	p53 CDE Neg		AFM	CATGTGTCAATCTCAGAATG	28	102.437	p53 CDE Neg		AFM	CATGTGTCAATCTCAGAATG	31	97.3688	p53 CDE Neg
AFM	CTATCTTCGTGAGCCTGATG	74	379.332	p53 CDE Neg		AFM	CTATCTTCGTGAGCCTGATG	94	360.536	p53 CDE Neg		AFM	CTATCTTCGTGAGCCTGATG	151	421.538	p53 CDE Neg		AFM	CTATCTTCGTGAGCCTGATG	74	296.405	p53 CDE Neg		AFM	CTATCTTCGTGAGCCTGATG	205	555.759	p53 CDE Neg		AFM	CTATCTTCGTGAGCCTGATG	73	423.889	p53 CDE Neg		AFM	CTATCTTCGTGAGCCTGATG	18	65.8525	p53 CDE Neg		AFM	CTATCTTCGTGAGCCTGATG	50	157.047	p53 CDE Neg
AFM	GCATTTCTCTTCGGGATCCA	45	230.675	p53 CDE Neg		AFM	GCATTTCTCTTCGGGATCCA	74	283.826	p53 CDE Neg		AFM	GCATTTCTCTTCGGGATCCA	99	276.373	p53 CDE Neg		AFM	GCATTTCTCTTCGGGATCCA	108	432.592	p53 CDE Neg		AFM	GCATTTCTCTTCGGGATCCA	97	262.969	p53 CDE Neg		AFM	GCATTTCTCTTCGGGATCCA	54	313.562	p53 CDE Neg		AFM	GCATTTCTCTTCGGGATCCA	10	36.5847	p53 CDE Neg		AFM	GCATTTCTCTTCGGGATCCA	97	304.67	p53 CDE Neg
AFM	TTAAACTTACTGATTTAAAA	105	538.241	p53 CDE Neg		AFM	TTAAACTTACTGATTTAAAA	96	368.207	p53 CDE Neg		AFM	TTAAACTTACTGATTTAAAA	172	480.163	p53 CDE Neg		AFM	TTAAACTTACTGATTTAAAA	118	472.647	p53 CDE Neg		AFM	TTAAACTTACTGATTTAAAA	161	436.474	p53 CDE Neg		AFM	TTAAACTTACTGATTTAAAA	91	528.409	p53 CDE Neg		AFM	TTAAACTTACTGATTTAAAA	87	318.287	p53 CDE Neg		AFM	TTAAACTTACTGATTTAAAA	34	106.792	p53 CDE Neg
AGTPBP1	AAGAAGAATGTATTTATGTA	62	317.818	p53 CDE Neg		AGTPBP1	AAGAAGAATGTATTTATGTA	69	264.649	p53 CDE Neg		AGTPBP1	AAGAAGAATGTATTTATGTA	62	173.082	p53 CDE Neg		AGTPBP1	AAGAAGAATGTATTTATGTA	55	220.301	p53 CDE Neg		AGTPBP1	AAGAAGAATGTATTTATGTA	133	360.566	p53 CDE Neg		AGTPBP1	AAGAAGAATGTATTTATGTA	71	412.275	p53 CDE Neg		AGTPBP1	AAGAAGAATGTATTTATGTA	90	329.263	p53 CDE Neg		AGTPBP1	AAGAAGAATGTATTTATGTA	108	339.22	p53 CDE Neg
AGTPBP1	ACATAAATACATTCTTCTTT	50	256.305	p53 CDE Neg		AGTPBP1	ACATAAATACATTCTTCTTT	49	187.939	p53 CDE Neg		AGTPBP1	ACATAAATACATTCTTCTTT	104	290.331	p53 CDE Neg		AGTPBP1	ACATAAATACATTCTTCTTT	125	500.685	p53 CDE Neg		AGTPBP1	ACATAAATACATTCTTCTTT	80	216.882	p53 CDE Neg		AGTPBP1	ACATAAATACATTCTTCTTT	54	313.562	p53 CDE Neg		AGTPBP1	ACATAAATACATTCTTCTTT	70	256.093	p53 CDE Neg		AGTPBP1	ACATAAATACATTCTTCTTT	90	282.684	p53 CDE Neg
AGTPBP1	ATTGCAACAGCCCCTTAGCA	79	404.962	p53 CDE Neg		AGTPBP1	ATTGCAACAGCCCCTTAGCA	112	429.575	p53 CDE Neg		AGTPBP1	ATTGCAACAGCCCCTTAGCA	222	619.745	p53 CDE Neg		AGTPBP1	ATTGCAACAGCCCCTTAGCA	147	588.805	p53 CDE Neg		AGTPBP1	ATTGCAACAGCCCCTTAGCA	156	422.919	p53 CDE Neg		AGTPBP1	ATTGCAACAGCCCCTTAGCA	84	487.762	p53 CDE Neg		AGTPBP1	ATTGCAACAGCCCCTTAGCA	25	91.4619	p53 CDE Neg		AGTPBP1	ATTGCAACAGCCCCTTAGCA	78	244.993	p53 CDE Neg
AGTPBP1	CAGCACGTGTTGTAGTTTGG	94	481.854	p53 CDE Neg		AGTPBP1	CAGCACGTGTTGTAGTTTGG	122	467.93	p53 CDE Neg		AGTPBP1	CAGCACGTGTTGTAGTTTGG	174	485.746	p53 CDE Neg		AGTPBP1	CAGCACGTGTTGTAGTTTGG	135	540.74	p53 CDE Neg		AGTPBP1	CAGCACGTGTTGTAGTTTGG	157	425.63	p53 CDE Neg		AGTPBP1	CAGCACGTGTTGTAGTTTGG	66	383.242	p53 CDE Neg		AGTPBP1	CAGCACGTGTTGTAGTTTGG	112	409.749	p53 CDE Neg		AGTPBP1	CAGCACGTGTTGTAGTTTGG	181	568.508	p53 CDE Neg
AGTPBP1	CCTGCCGTAGGAACAACAAT	59	302.44	p53 CDE Neg		AGTPBP1	CCTGCCGTAGGAACAACAAT	104	398.891	p53 CDE Neg		AGTPBP1	CCTGCCGTAGGAACAACAAT	134	374.08	p53 CDE Neg		AGTPBP1	CCTGCCGTAGGAACAACAAT	93	372.51	p53 CDE Neg		AGTPBP1	CCTGCCGTAGGAACAACAAT	125	338.877	p53 CDE Neg		AGTPBP1	CCTGCCGTAGGAACAACAAT	56	325.175	p53 CDE Neg		AGTPBP1	CCTGCCGTAGGAACAACAAT	9	32.9263	p53 CDE Neg		AGTPBP1	CCTGCCGTAGGAACAACAAT	26	81.6642	p53 CDE Neg
AGTPBP1	GCACAGGTAAGGACAGTAAG	35	179.414	p53 CDE Neg		AGTPBP1	GCACAGGTAAGGACAGTAAG	33	126.571	p53 CDE Neg		AGTPBP1	GCACAGGTAAGGACAGTAAG	78	217.748	p53 CDE Neg		AGTPBP1	GCACAGGTAAGGACAGTAAG	18	72.0986	p53 CDE Neg		AGTPBP1	GCACAGGTAAGGACAGTAAG	79	214.17	p53 CDE Neg		AGTPBP1	GCACAGGTAAGGACAGTAAG	15	87.1004	p53 CDE Neg		AGTPBP1	GCACAGGTAAGGACAGTAAG	66	241.459	p53 CDE Neg		AGTPBP1	GCACAGGTAAGGACAGTAAG	141	442.871	p53 CDE Neg
AGTPBP1	GCATCGGTTGAAGTACCTGA	61	312.692	p53 CDE Neg		AGTPBP1	GCATCGGTTGAAGTACCTGA	77	295.333	p53 CDE Neg		AGTPBP1	GCATCGGTTGAAGTACCTGA	104	290.331	p53 CDE Neg		AGTPBP1	GCATCGGTTGAAGTACCTGA	88	352.482	p53 CDE Neg		AGTPBP1	GCATCGGTTGAAGTACCTGA	207	561.181	p53 CDE Neg		AGTPBP1	GCATCGGTTGAAGTACCTGA	48	278.721	p53 CDE Neg		AGTPBP1	GCATCGGTTGAAGTACCTGA	60	219.508	p53 CDE Neg		AGTPBP1	GCATCGGTTGAAGTACCTGA	71	223.006	p53 CDE Neg
AGTPBP1	GTAGGATGTAAATCCGGACT	29	148.657	p53 CDE Neg		AGTPBP1	GTAGGATGTAAATCCGGACT	52	199.445	p53 CDE Neg		AGTPBP1	GTAGGATGTAAATCCGGACT	65	181.457	p53 CDE Neg		AGTPBP1	GTAGGATGTAAATCCGGACT	70	280.384	p53 CDE Neg		AGTPBP1	GTAGGATGTAAATCCGGACT	77	208.748	p53 CDE Neg		AGTPBP1	GTAGGATGTAAATCCGGACT	40	232.268	p53 CDE Neg		AGTPBP1	GTAGGATGTAAATCCGGACT	549	2008.5	p53 CDE Neg		AGTPBP1	GTAGGATGTAAATCCGGACT	624	1959.94	p53 CDE Neg
AGTPBP1	GTATTTGAGGGAAAAGTACG	79	404.962	p53 CDE Neg		AGTPBP1	GTATTTGAGGGAAAAGTACG	133	510.12	p53 CDE Neg		AGTPBP1	GTATTTGAGGGAAAAGTACG	103	287.539	p53 CDE Neg		AGTPBP1	GTATTTGAGGGAAAAGTACG	78	312.427	p53 CDE Neg		AGTPBP1	GTATTTGAGGGAAAAGTACG	102	276.524	p53 CDE Neg		AGTPBP1	GTATTTGAGGGAAAAGTACG	52	301.948	p53 CDE Neg		AGTPBP1	GTATTTGAGGGAAAAGTACG	544	1990.21	p53 CDE Neg		AGTPBP1	GTATTTGAGGGAAAAGTACG	320	1005.1	p53 CDE Neg
AGTPBP1	TCGCTGTTCTTTAAGTGGAG	46	235.801	p53 CDE Neg		AGTPBP1	TCGCTGTTCTTTAAGTGGAG	47	180.268	p53 CDE Neg		AGTPBP1	TCGCTGTTCTTTAAGTGGAG	46	128.416	p53 CDE Neg		AGTPBP1	TCGCTGTTCTTTAAGTGGAG	48	192.263	p53 CDE Neg		AGTPBP1	TCGCTGTTCTTTAAGTGGAG	120	325.322	p53 CDE Neg		AGTPBP1	TCGCTGTTCTTTAAGTGGAG	21	121.941	p53 CDE Neg		AGTPBP1	TCGCTGTTCTTTAAGTGGAG	16	58.5356	p53 CDE Neg		AGTPBP1	TCGCTGTTCTTTAAGTGGAG	39	122.496	p53 CDE Neg
AGXT	AGTTCCCCGAAGCCATCAAG	35	179.414	p53 CDE Pos		AGXT	AGTTCCCCGAAGCCATCAAG	15	57.5323	p53 CDE Pos		AGXT	AGTTCCCCGAAGCCATCAAG	66	184.248	p53 CDE Pos		AGXT	AGTTCCCCGAAGCCATCAAG	30	120.164	p53 CDE Pos		AGXT	AGTTCCCCGAAGCCATCAAG	70	189.771	p53 CDE Pos		AGXT	AGTTCCCCGAAGCCATCAAG	42	243.881	p53 CDE Pos		AGXT	AGTTCCCCGAAGCCATCAAG	6	21.9508	p53 CDE Pos		AGXT	AGTTCCCCGAAGCCATCAAG	18	56.5367	p53 CDE Pos
AGXT	CCGAGTGCACCCGATGACCA	48	246.053	p53 CDE Pos		AGXT	CCGAGTGCACCCGATGACCA	78	299.168	p53 CDE Pos		AGXT	CCGAGTGCACCCGATGACCA	65	181.457	p53 CDE Pos		AGXT	CCGAGTGCACCCGATGACCA	49	196.268	p53 CDE Pos		AGXT	CCGAGTGCACCCGATGACCA	97	262.969	p53 CDE Pos		AGXT	CCGAGTGCACCCGATGACCA	48	278.721	p53 CDE Pos		AGXT	CCGAGTGCACCCGATGACCA	9	32.9263	p53 CDE Pos		AGXT	CCGAGTGCACCCGATGACCA	14	43.973	p53 CDE Pos
AGXT	CCGATGACCAAGGACCCTGG	63	322.944	p53 CDE Pos		AGXT	CCGATGACCAAGGACCCTGG	100	383.549	p53 CDE Pos		AGXT	CCGATGACCAAGGACCCTGG	68	189.832	p53 CDE Pos		AGXT	CCGATGACCAAGGACCCTGG	58	232.318	p53 CDE Pos		AGXT	CCGATGACCAAGGACCCTGG	139	376.832	p53 CDE Pos		AGXT	CCGATGACCAAGGACCCTGG	76	441.309	p53 CDE Pos		AGXT	CCGATGACCAAGGACCCTGG	227	830.474	p53 CDE Pos		AGXT	CCGATGACCAAGGACCCTGG	81	254.415	p53 CDE Pos
AGXT	CTCGCATCATGGCAGCCGGG	34	174.287	p53 CDE Pos		AGXT	CTCGCATCATGGCAGCCGGG	68	260.813	p53 CDE Pos		AGXT	CTCGCATCATGGCAGCCGGG	96	267.998	p53 CDE Pos		AGXT	CTCGCATCATGGCAGCCGGG	54	216.296	p53 CDE Pos		AGXT	CTCGCATCATGGCAGCCGGG	77	208.748	p53 CDE Pos		AGXT	CTCGCATCATGGCAGCCGGG	28	162.587	p53 CDE Pos		AGXT	CTCGCATCATGGCAGCCGGG	2	7.31695	p53 CDE Pos		AGXT	CTCGCATCATGGCAGCCGGG	17	53.3958	p53 CDE Pos
AGXT	CTTGCCGGTCCATGTAAAGG	59	302.44	p53 CDE Pos		AGXT	CTTGCCGGTCCATGTAAAGG	91	349.029	p53 CDE Pos		AGXT	CTTGCCGGTCCATGTAAAGG	98	273.581	p53 CDE Pos		AGXT	CTTGCCGGTCCATGTAAAGG	74	296.405	p53 CDE Pos		AGXT	CTTGCCGGTCCATGTAAAGG	130	352.432	p53 CDE Pos		AGXT	CTTGCCGGTCCATGTAAAGG	56	325.175	p53 CDE Pos		AGXT	CTTGCCGGTCCATGTAAAGG	230	841.449	p53 CDE Pos		AGXT	CTTGCCGGTCCATGTAAAGG	202	634.468	p53 CDE Pos
AGXT	GACCAGGAACCCACTCACAC	80	410.088	p53 CDE Pos		AGXT	GACCAGGAACCCACTCACAC	103	395.055	p53 CDE Pos		AGXT	GACCAGGAACCCACTCACAC	64	178.665	p53 CDE Pos		AGXT	GACCAGGAACCCACTCACAC	66	264.362	p53 CDE Pos		AGXT	GACCAGGAACCCACTCACAC	86	233.148	p53 CDE Pos		AGXT	GACCAGGAACCCACTCACAC	58	336.788	p53 CDE Pos		AGXT	GACCAGGAACCCACTCACAC	41	149.997	p53 CDE Pos		AGXT	GACCAGGAACCCACTCACAC	16	50.2549	p53 CDE Pos
AGXT	GCTGCTGTTCTTAACCCACG	71	363.953	p53 CDE Pos		AGXT	GCTGCTGTTCTTAACCCACG	82	314.51	p53 CDE Pos		AGXT	GCTGCTGTTCTTAACCCACG	123	343.372	p53 CDE Pos		AGXT	GCTGCTGTTCTTAACCCACG	93	372.51	p53 CDE Pos		AGXT	GCTGCTGTTCTTAACCCACG	174	471.717	p53 CDE Pos		AGXT	GCTGCTGTTCTTAACCCACG	40	232.268	p53 CDE Pos		AGXT	GCTGCTGTTCTTAACCCACG	91	332.921	p53 CDE Pos		AGXT	GCTGCTGTTCTTAACCCACG	25	78.5233	p53 CDE Pos
AGXT	GTACAAGTGCCTGCTCCTGG	101	517.736	p53 CDE Pos		AGXT	GTACAAGTGCCTGCTCCTGG	103	395.055	p53 CDE Pos		AGXT	GTACAAGTGCCTGCTCCTGG	56	156.332	p53 CDE Pos		AGXT	GTACAAGTGCCTGCTCCTGG	109	436.597	p53 CDE Pos		AGXT	GTACAAGTGCCTGCTCCTGG	148	401.231	p53 CDE Pos		AGXT	GTACAAGTGCCTGCTCCTGG	37	214.848	p53 CDE Pos		AGXT	GTACAAGTGCCTGCTCCTGG	44	160.973	p53 CDE Pos		AGXT	GTACAAGTGCCTGCTCCTGG	48	150.765	p53 CDE Pos
AGXT	GTGCTGCTGTTCTTAACCCA	28	143.531	p53 CDE Pos		AGXT	GTGCTGCTGTTCTTAACCCA	35	134.242	p53 CDE Pos		AGXT	GTGCTGCTGTTCTTAACCCA	50	139.582	p53 CDE Pos		AGXT	GTGCTGCTGTTCTTAACCCA	46	184.252	p53 CDE Pos		AGXT	GTGCTGCTGTTCTTAACCCA	41	111.152	p53 CDE Pos		AGXT	GTGCTGCTGTTCTTAACCCA	33	191.621	p53 CDE Pos		AGXT	GTGCTGCTGTTCTTAACCCA	3	10.9754	p53 CDE Pos		AGXT	GTGCTGCTGTTCTTAACCCA	29	91.087	p53 CDE Pos
AGXT	TATGCGCTCCCCGATGTCCA	40	205.044	p53 CDE Pos		AGXT	TATGCGCTCCCCGATGTCCA	54	207.116	p53 CDE Pos		AGXT	TATGCGCTCCCCGATGTCCA	105	293.123	p53 CDE Pos		AGXT	TATGCGCTCCCCGATGTCCA	103	412.564	p53 CDE Pos		AGXT	TATGCGCTCCCCGATGTCCA	132	357.854	p53 CDE Pos		AGXT	TATGCGCTCCCCGATGTCCA	68	394.855	p53 CDE Pos		AGXT	TATGCGCTCCCCGATGTCCA	151	552.43	p53 CDE Pos		AGXT	TATGCGCTCCCCGATGTCCA	177	555.945	p53 CDE Pos
AKR1C1	AATGAGCAGAATCAATATGG	94	481.854	p53 CDE Pos		AKR1C1	AATGAGCAGAATCAATATGG	136	521.626	p53 CDE Pos		AKR1C1	AATGAGCAGAATCAATATGG	258	720.244	p53 CDE Pos		AKR1C1	AATGAGCAGAATCAATATGG	125	500.685	p53 CDE Pos		AKR1C1	AATGAGCAGAATCAATATGG	152	412.075	p53 CDE Pos		AKR1C1	AATGAGCAGAATCAATATGG	58	336.788	p53 CDE Pos		AKR1C1	AATGAGCAGAATCAATATGG	33	120.73	p53 CDE Pos		AKR1C1	AATGAGCAGAATCAATATGG	20	62.8186	p53 CDE Pos
AKR1C1	AGTGGATCTCTGTGCCACAT	36	184.54	p53 CDE Pos		AKR1C1	AGTGGATCTCTGTGCCACAT	45	172.597	p53 CDE Pos		AKR1C1	AGTGGATCTCTGTGCCACAT	17	47.4579	p53 CDE Pos		AKR1C1	AGTGGATCTCTGTGCCACAT	4	16.0219	p53 CDE Pos		AKR1C1	AGTGGATCTCTGTGCCACAT	43	116.574	p53 CDE Pos		AKR1C1	AGTGGATCTCTGTGCCACAT	27	156.781	p53 CDE Pos		AKR1C1	AGTGGATCTCTGTGCCACAT	35	128.047	p53 CDE Pos		AKR1C1	AGTGGATCTCTGTGCCACAT	101	317.234	p53 CDE Pos
AKR1C1	CCAAACACTCACCTCCCATG	61	312.692	p53 CDE Pos		AKR1C1	CCAAACACTCACCTCCCATG	91	349.029	p53 CDE Pos		AKR1C1	CCAAACACTCACCTCCCATG	83	231.706	p53 CDE Pos		AKR1C1	CCAAACACTCACCTCCCATG	29	116.159	p53 CDE Pos		AKR1C1	CCAAACACTCACCTCCCATG	115	311.767	p53 CDE Pos		AKR1C1	CCAAACACTCACCTCCCATG	64	371.628	p53 CDE Pos		AKR1C1	CCAAACACTCACCTCCCATG	7	25.6093	p53 CDE Pos		AKR1C1	CCAAACACTCACCTCCCATG	37	116.214	p53 CDE Pos
AKR1C1	CTGGAAAATGAATAAGGTAG	212	1086.73	p53 CDE Pos		AKR1C1	CTGGAAAATGAATAAGGTAG	271	1039.42	p53 CDE Pos		AKR1C1	CTGGAAAATGAATAAGGTAG	446	1245.07	p53 CDE Pos		AKR1C1	CTGGAAAATGAATAAGGTAG	385	1542.11	p53 CDE Pos		AKR1C1	CTGGAAAATGAATAAGGTAG	317	859.393	p53 CDE Pos		AKR1C1	CTGGAAAATGAATAAGGTAG	184	1068.43	p53 CDE Pos		AKR1C1	CTGGAAAATGAATAAGGTAG	1253	4584.07	p53 CDE Pos		AKR1C1	CTGGAAAATGAATAAGGTAG	404	1268.94	p53 CDE Pos
AKR1C1	AAAAATACTATTTGACACAG	15	76.8915	p53 CDE Pos		AKR1C1	AAAAATACTATTTGACACAG	26	99.7227	p53 CDE Pos		AKR1C1	AAAAATACTATTTGACACAG	89	248.456	p53 CDE Pos		AKR1C1	AAAAATACTATTTGACACAG	122	488.668	p53 CDE Pos		AKR1C1	AAAAATACTATTTGACACAG	57	154.528	p53 CDE Pos		AKR1C1	AAAAATACTATTTGACACAG	19	110.327	p53 CDE Pos		AKR1C1	AAAAATACTATTTGACACAG	16	58.5356	p53 CDE Pos		AKR1C1	AAAAATACTATTTGACACAG	97	304.67	p53 CDE Pos
AKR1C1	TCGGACCAACTCTGGTCGAT	16	82.0176	p53 CDE Pos		AKR1C1	TCGGACCAACTCTGGTCGAT	34	130.407	p53 CDE Pos		AKR1C1	TCGGACCAACTCTGGTCGAT	25	69.7911	p53 CDE Pos		AKR1C1	TCGGACCAACTCTGGTCGAT	16	64.0877	p53 CDE Pos		AKR1C1	TCGGACCAACTCTGGTCGAT	69	187.06	p53 CDE Pos		AKR1C1	TCGGACCAACTCTGGTCGAT	22	127.747	p53 CDE Pos		AKR1C1	TCGGACCAACTCTGGTCGAT	17	62.1941	p53 CDE Pos		AKR1C1	TCGGACCAACTCTGGTCGAT	75	235.57	p53 CDE Pos
AKR1C1	GGATCATCTCCAGCTGCCTG	84	430.593	p53 CDE Pos		AKR1C1	GGATCATCTCCAGCTGCCTG	78	299.168	p53 CDE Pos		AKR1C1	GGATCATCTCCAGCTGCCTG	104	290.331	p53 CDE Pos		AKR1C1	GGATCATCTCCAGCTGCCTG	68	272.373	p53 CDE Pos		AKR1C1	GGATCATCTCCAGCTGCCTG	104	281.946	p53 CDE Pos		AKR1C1	GGATCATCTCCAGCTGCCTG	47	272.915	p53 CDE Pos		AKR1C1	GGATCATCTCCAGCTGCCTG	17	62.1941	p53 CDE Pos		AKR1C1	GGATCATCTCCAGCTGCCTG	34	106.792	p53 CDE Pos
AKR1C1	TGGCACCTATGCGCCTGCAG	32	164.035	p53 CDE Pos		AKR1C1	TGGCACCTATGCGCCTGCAG	44	168.761	p53 CDE Pos		AKR1C1	TGGCACCTATGCGCCTGCAG	40	111.666	p53 CDE Pos		AKR1C1	TGGCACCTATGCGCCTGCAG	21	84.1151	p53 CDE Pos		AKR1C1	TGGCACCTATGCGCCTGCAG	55	149.106	p53 CDE Pos		AKR1C1	TGGCACCTATGCGCCTGCAG	21	121.941	p53 CDE Pos		AKR1C1	TGGCACCTATGCGCCTGCAG	0	0	p53 CDE Pos		AKR1C1	TGGCACCTATGCGCCTGCAG	0	0	p53 CDE Pos
AKR1C1	CTTCAACCAGAGAAAACTGC	15	76.8915	p53 CDE Pos		AKR1C1	CTTCAACCAGAGAAAACTGC	77	295.333	p53 CDE Pos		AKR1C1	CTTCAACCAGAGAAAACTGC	67	187.04	p53 CDE Pos		AKR1C1	CTTCAACCAGAGAAAACTGC	42	168.23	p53 CDE Pos		AKR1C1	CTTCAACCAGAGAAAACTGC	60	162.661	p53 CDE Pos		AKR1C1	CTTCAACCAGAGAAAACTGC	34	197.428	p53 CDE Pos		AKR1C1	CTTCAACCAGAGAAAACTGC	870	3182.87	p53 CDE Pos		AKR1C1	CTTCAACCAGAGAAAACTGC	684	2148.4	p53 CDE Pos
AKR1C1	ATCCGAAGCAAGATTGCAGA	66	338.323	p53 CDE Pos		AKR1C1	ATCCGAAGCAAGATTGCAGA	86	329.852	p53 CDE Pos		AKR1C1	ATCCGAAGCAAGATTGCAGA	63	175.874	p53 CDE Pos		AKR1C1	ATCCGAAGCAAGATTGCAGA	99	396.542	p53 CDE Pos		AKR1C1	ATCCGAAGCAAGATTGCAGA	130	352.432	p53 CDE Pos		AKR1C1	ATCCGAAGCAAGATTGCAGA	62	360.015	p53 CDE Pos		AKR1C1	ATCCGAAGCAAGATTGCAGA	87	318.287	p53 CDE Pos		AKR1C1	ATCCGAAGCAAGATTGCAGA	92	288.966	p53 CDE Pos
ALDH4A1	ACCAACAGCACGGTGTACCG	18	92.2698	p53 CDE Neg		ALDH4A1	ACCAACAGCACGGTGTACCG	26	99.7227	p53 CDE Neg		ALDH4A1	ACCAACAGCACGGTGTACCG	35	97.7075	p53 CDE Neg		ALDH4A1	ACCAACAGCACGGTGTACCG	18	72.0986	p53 CDE Neg		ALDH4A1	ACCAACAGCACGGTGTACCG	64	173.505	p53 CDE Neg		ALDH4A1	ACCAACAGCACGGTGTACCG	37	214.848	p53 CDE Neg		ALDH4A1	ACCAACAGCACGGTGTACCG	49	179.265	p53 CDE Neg		ALDH4A1	ACCAACAGCACGGTGTACCG	143	449.153	p53 CDE Neg
ALDH4A1	AGGATGTAGTGTGGGCCCCC	30	153.783	p53 CDE Neg		ALDH4A1	AGGATGTAGTGTGGGCCCCC	72	276.155	p53 CDE Neg		ALDH4A1	AGGATGTAGTGTGGGCCCCC	81	226.123	p53 CDE Neg		ALDH4A1	AGGATGTAGTGTGGGCCCCC	44	176.241	p53 CDE Neg		ALDH4A1	AGGATGTAGTGTGGGCCCCC	103	279.235	p53 CDE Neg		ALDH4A1	AGGATGTAGTGTGGGCCCCC	62	360.015	p53 CDE Neg		ALDH4A1	AGGATGTAGTGTGGGCCCCC	11	40.2432	p53 CDE Neg		ALDH4A1	AGGATGTAGTGTGGGCCCCC	12	37.6912	p53 CDE Neg
ALDH4A1	AGGGGCGGGACAGCAGGGCG	43	220.422	p53 CDE Neg		ALDH4A1	AGGGGCGGGACAGCAGGGCG	59	226.294	p53 CDE Neg		ALDH4A1	AGGGGCGGGACAGCAGGGCG	184	513.662	p53 CDE Neg		ALDH4A1	AGGGGCGGGACAGCAGGGCG	69	276.378	p53 CDE Neg		ALDH4A1	AGGGGCGGGACAGCAGGGCG	53	143.684	p53 CDE Neg		ALDH4A1	AGGGGCGGGACAGCAGGGCG	31	180.008	p53 CDE Neg		ALDH4A1	AGGGGCGGGACAGCAGGGCG	150	548.771	p53 CDE Neg		ALDH4A1	AGGGGCGGGACAGCAGGGCG	81	254.415	p53 CDE Neg
ALDH4A1	CCTTCCCCAGGGCTTCGTGG	103	527.989	p53 CDE Neg		ALDH4A1	CCTTCCCCAGGGCTTCGTGG	118	452.588	p53 CDE Neg		ALDH4A1	CCTTCCCCAGGGCTTCGTGG	79	220.54	p53 CDE Neg		ALDH4A1	CCTTCCCCAGGGCTTCGTGG	108	432.592	p53 CDE Neg		ALDH4A1	CCTTCCCCAGGGCTTCGTGG	158	428.341	p53 CDE Neg		ALDH4A1	CCTTCCCCAGGGCTTCGTGG	64	371.628	p53 CDE Neg		ALDH4A1	CCTTCCCCAGGGCTTCGTGG	39	142.68	p53 CDE Neg		ALDH4A1	CCTTCCCCAGGGCTTCGTGG	42	131.919	p53 CDE Neg
ALDH4A1	CGGTCCAGGGGCGGGACAGC	25	128.153	p53 CDE Neg		ALDH4A1	CGGTCCAGGGGCGGGACAGC	55	210.952	p53 CDE Neg		ALDH4A1	CGGTCCAGGGGCGGGACAGC	64	178.665	p53 CDE Neg		ALDH4A1	CGGTCCAGGGGCGGGACAGC	48	192.263	p53 CDE Neg		ALDH4A1	CGGTCCAGGGGCGGGACAGC	59	159.95	p53 CDE Neg		ALDH4A1	CGGTCCAGGGGCGGGACAGC	23	133.554	p53 CDE Neg		ALDH4A1	CGGTCCAGGGGCGGGACAGC	26	95.1203	p53 CDE Neg		ALDH4A1	CGGTCCAGGGGCGGGACAGC	32	100.51	p53 CDE Neg
ALDH4A1	GCGCCCTGCTGTCCCGCCCC	22	112.774	p53 CDE Neg		ALDH4A1	GCGCCCTGCTGTCCCGCCCC	11	42.1904	p53 CDE Neg		ALDH4A1	GCGCCCTGCTGTCCCGCCCC	29	80.9576	p53 CDE Neg		ALDH4A1	GCGCCCTGCTGTCCCGCCCC	12	48.0658	p53 CDE Neg		ALDH4A1	GCGCCCTGCTGTCCCGCCCC	52	140.973	p53 CDE Neg		ALDH4A1	GCGCCCTGCTGTCCCGCCCC	15	87.1004	p53 CDE Neg		ALDH4A1	GCGCCCTGCTGTCCCGCCCC	18	65.8525	p53 CDE Neg		ALDH4A1	GCGCCCTGCTGTCCCGCCCC	9	28.2684	p53 CDE Neg
ALDH4A1	GGAACCAATGACAAGCCAGG	27	138.405	p53 CDE Neg		ALDH4A1	GGAACCAATGACAAGCCAGG	49	187.939	p53 CDE Neg		ALDH4A1	GGAACCAATGACAAGCCAGG	155	432.705	p53 CDE Neg		ALDH4A1	GGAACCAATGACAAGCCAGG	99	396.542	p53 CDE Neg		ALDH4A1	GGAACCAATGACAAGCCAGG	63	170.794	p53 CDE Neg		ALDH4A1	GGAACCAATGACAAGCCAGG	33	191.621	p53 CDE Neg		ALDH4A1	GGAACCAATGACAAGCCAGG	1	3.65847	p53 CDE Neg		ALDH4A1	GGAACCAATGACAAGCCAGG	10	31.4093	p53 CDE Neg
ALDH4A1	GGGTAAGACCGTGATCCAAG	73	374.205	p53 CDE Neg		ALDH4A1	GGGTAAGACCGTGATCCAAG	47	180.268	p53 CDE Neg		ALDH4A1	GGGTAAGACCGTGATCCAAG	130	362.914	p53 CDE Neg		ALDH4A1	GGGTAAGACCGTGATCCAAG	68	272.373	p53 CDE Neg		ALDH4A1	GGGTAAGACCGTGATCCAAG	140	379.543	p53 CDE Neg		ALDH4A1	GGGTAAGACCGTGATCCAAG	60	348.402	p53 CDE Neg		ALDH4A1	GGGTAAGACCGTGATCCAAG	131	479.26	p53 CDE Neg		ALDH4A1	GGGTAAGACCGTGATCCAAG	96	301.529	p53 CDE Neg
ALDH4A1	GTCCAGCGCAGGATGTAGTG	76	389.584	p53 CDE Neg		ALDH4A1	GTCCAGCGCAGGATGTAGTG	122	467.93	p53 CDE Neg		ALDH4A1	GTCCAGCGCAGGATGTAGTG	364	1016.16	p53 CDE Neg		ALDH4A1	GTCCAGCGCAGGATGTAGTG	261	1045.43	p53 CDE Neg		ALDH4A1	GTCCAGCGCAGGATGTAGTG	129	349.721	p53 CDE Neg		ALDH4A1	GTCCAGCGCAGGATGTAGTG	87	505.182	p53 CDE Neg		ALDH4A1	GTCCAGCGCAGGATGTAGTG	30	109.754	p53 CDE Neg		ALDH4A1	GTCCAGCGCAGGATGTAGTG	43	135.06	p53 CDE Neg
ALDH4A1	TTTAACTTCACTGCAATCGG	17	87.1437	p53 CDE Neg		ALDH4A1	TTTAACTTCACTGCAATCGG	45	172.597	p53 CDE Neg		ALDH4A1	TTTAACTTCACTGCAATCGG	30	83.7493	p53 CDE Neg		ALDH4A1	TTTAACTTCACTGCAATCGG	23	92.126	p53 CDE Neg		ALDH4A1	TTTAACTTCACTGCAATCGG	62	168.083	p53 CDE Neg		ALDH4A1	TTTAACTTCACTGCAATCGG	34	197.428	p53 CDE Neg		ALDH4A1	TTTAACTTCACTGCAATCGG	3	10.9754	p53 CDE Neg		ALDH4A1	TTTAACTTCACTGCAATCGG	24	75.3823	p53 CDE Neg
AMN1	AACAGATTCAAATATAAGTG	23	117.9	p53 CDE Neutral		AMN1	AACAGATTCAAATATAAGTG	32	122.736	p53 CDE Neutral		AMN1	AACAGATTCAAATATAAGTG	79	220.54	p53 CDE Neutral		AMN1	AACAGATTCAAATATAAGTG	66	264.362	p53 CDE Neutral		AMN1	AACAGATTCAAATATAAGTG	80	216.882	p53 CDE Neutral		AMN1	AACAGATTCAAATATAAGTG	16	92.9071	p53 CDE Neutral		AMN1	AACAGATTCAAATATAAGTG	7	25.6093	p53 CDE Neutral		AMN1	AACAGATTCAAATATAAGTG	4	12.5637	p53 CDE Neutral
AMN1	AAGTCCAAACTCTAGATCTA	91	466.475	p53 CDE Neutral		AMN1	AAGTCCAAACTCTAGATCTA	110	421.904	p53 CDE Neutral		AMN1	AAGTCCAAACTCTAGATCTA	177	494.121	p53 CDE Neutral		AMN1	AAGTCCAAACTCTAGATCTA	130	520.712	p53 CDE Neutral		AMN1	AAGTCCAAACTCTAGATCTA	159	431.052	p53 CDE Neutral		AMN1	AAGTCCAAACTCTAGATCTA	68	394.855	p53 CDE Neutral		AMN1	AAGTCCAAACTCTAGATCTA	107	391.457	p53 CDE Neutral		AMN1	AAGTCCAAACTCTAGATCTA	158	496.267	p53 CDE Neutral
AMN1	AGCTCCGTAGATCTAGAGTT	0	0	p53 CDE Neutral		AMN1	AGCTCCGTAGATCTAGAGTT	0	0	p53 CDE Neutral		AMN1	AGCTCCGTAGATCTAGAGTT	0	0	p53 CDE Neutral		AMN1	AGCTCCGTAGATCTAGAGTT	0	0	p53 CDE Neutral		AMN1	AGCTCCGTAGATCTAGAGTT	0	0	p53 CDE Neutral		AMN1	AGCTCCGTAGATCTAGAGTT	0	0	p53 CDE Neutral		AMN1	AGCTCCGTAGATCTAGAGTT	0	0	p53 CDE Neutral		AMN1	AGCTCCGTAGATCTAGAGTT	0	0	p53 CDE Neutral
AMN1	AGCTCCGTAGATCTAGAGTT	0	0	p53 CDE Neutral		AMN1	AGCTCCGTAGATCTAGAGTT	0	0	p53 CDE Neutral		AMN1	AGCTCCGTAGATCTAGAGTT	0	0	p53 CDE Neutral		AMN1	AGCTCCGTAGATCTAGAGTT	0	0	p53 CDE Neutral		AMN1	AGCTCCGTAGATCTAGAGTT	0	0	p53 CDE Neutral		AMN1	AGCTCCGTAGATCTAGAGTT	0	0	p53 CDE Neutral		AMN1	AGCTCCGTAGATCTAGAGTT	0	0	p53 CDE Neutral		AMN1	AGCTCCGTAGATCTAGAGTT	0	0	p53 CDE Neutral
AMN1	ATACGTATATTACTCTTCCA	55	281.936	p53 CDE Neutral		AMN1	ATACGTATATTACTCTTCCA	61	233.965	p53 CDE Neutral		AMN1	ATACGTATATTACTCTTCCA	403	1125.03	p53 CDE Neutral		AMN1	ATACGTATATTACTCTTCCA	126	504.69	p53 CDE Neutral		AMN1	ATACGTATATTACTCTTCCA	57	154.528	p53 CDE Neutral		AMN1	ATACGTATATTACTCTTCCA	34	197.428	p53 CDE Neutral		AMN1	ATACGTATATTACTCTTCCA	6	21.9508	p53 CDE Neutral		AMN1	ATACGTATATTACTCTTCCA	0	0	p53 CDE Neutral
AMN1	CTAAAGATCATCGATTTAGG	98	502.358	p53 CDE Neutral		AMN1	CTAAAGATCATCGATTTAGG	94	360.536	p53 CDE Neutral		AMN1	CTAAAGATCATCGATTTAGG	193	538.787	p53 CDE Neutral		AMN1	CTAAAGATCATCGATTTAGG	135	540.74	p53 CDE Neutral		AMN1	CTAAAGATCATCGATTTAGG	174	471.717	p53 CDE Neutral		AMN1	CTAAAGATCATCGATTTAGG	67	389.049	p53 CDE Neutral		AMN1	CTAAAGATCATCGATTTAGG	96	351.214	p53 CDE Neutral		AMN1	CTAAAGATCATCGATTTAGG	64	201.02	p53 CDE Neutral
AMN1	GGTGTGATTGCACTTGTTAG	45	230.675	p53 CDE Neutral		AMN1	GGTGTGATTGCACTTGTTAG	90	345.194	p53 CDE Neutral		AMN1	GGTGTGATTGCACTTGTTAG	77	214.957	p53 CDE Neutral		AMN1	GGTGTGATTGCACTTGTTAG	78	312.427	p53 CDE Neutral		AMN1	GGTGTGATTGCACTTGTTAG	79	214.17	p53 CDE Neutral		AMN1	GGTGTGATTGCACTTGTTAG	52	301.948	p53 CDE Neutral		AMN1	GGTGTGATTGCACTTGTTAG	25	91.4619	p53 CDE Neutral		AMN1	GGTGTGATTGCACTTGTTAG	60	188.456	p53 CDE Neutral
AMN1	TGCTGCAATCTCACTGACGA	22	112.774	p53 CDE Neutral		AMN1	TGCTGCAATCTCACTGACGA	47	180.268	p53 CDE Neutral		AMN1	TGCTGCAATCTCACTGACGA	87	242.873	p53 CDE Neutral		AMN1	TGCTGCAATCTCACTGACGA	42	168.23	p53 CDE Neutral		AMN1	TGCTGCAATCTCACTGACGA	93	252.125	p53 CDE Neutral		AMN1	TGCTGCAATCTCACTGACGA	33	191.621	p53 CDE Neutral		AMN1	TGCTGCAATCTCACTGACGA	16	58.5356	p53 CDE Neutral		AMN1	TGCTGCAATCTCACTGACGA	84	263.838	p53 CDE Neutral
AMN1	TTTTCAAAGAAGCTTCGTGT	0	0	p53 CDE Neutral		AMN1	TTTTCAAAGAAGCTTCGTGT	0	0	p53 CDE Neutral		AMN1	TTTTCAAAGAAGCTTCGTGT	0	0	p53 CDE Neutral		AMN1	TTTTCAAAGAAGCTTCGTGT	0	0	p53 CDE Neutral		AMN1	TTTTCAAAGAAGCTTCGTGT	0	0	p53 CDE Neutral		AMN1	TTTTCAAAGAAGCTTCGTGT	0	0	p53 CDE Neutral		AMN1	TTTTCAAAGAAGCTTCGTGT	0	0	p53 CDE Neutral		AMN1	TTTTCAAAGAAGCTTCGTGT	0	0	p53 CDE Neutral
AMPD2	ATGCTGTACTCCTCCATCAG	63	322.944	p53 CDE Neg		AMPD2	ATGCTGTACTCCTCCATCAG	116	444.917	p53 CDE Neg		AMPD2	ATGCTGTACTCCTCCATCAG	117	326.622	p53 CDE Neg		AMPD2	ATGCTGTACTCCTCCATCAG	240	961.315	p53 CDE Neg		AMPD2	ATGCTGTACTCCTCCATCAG	164	444.607	p53 CDE Neg		AMPD2	ATGCTGTACTCCTCCATCAG	56	325.175	p53 CDE Neg		AMPD2	ATGCTGTACTCCTCCATCAG	45	164.631	p53 CDE Neg		AMPD2	ATGCTGTACTCCTCCATCAG	41	128.778	p53 CDE Neg
AMPD2	ATTCTCTTCCTTACAGGTGA	75	384.458	p53 CDE Neg		AMPD2	ATTCTCTTCCTTACAGGTGA	149	571.488	p53 CDE Neg		AMPD2	ATTCTCTTCCTTACAGGTGA	159	443.871	p53 CDE Neg		AMPD2	ATTCTCTTCCTTACAGGTGA	101	404.553	p53 CDE Neg		AMPD2	ATTCTCTTCCTTACAGGTGA	158	428.341	p53 CDE Neg		AMPD2	ATTCTCTTCCTTACAGGTGA	86	499.376	p53 CDE Neg		AMPD2	ATTCTCTTCCTTACAGGTGA	65	237.801	p53 CDE Neg		AMPD2	ATTCTCTTCCTTACAGGTGA	212	665.877	p53 CDE Neg
AMPD2	CATATGCGCACCAGAGTGCA	33	169.161	p53 CDE Neg		AMPD2	CATATGCGCACCAGAGTGCA	22	84.3807	p53 CDE Neg		AMPD2	CATATGCGCACCAGAGTGCA	11	30.7081	p53 CDE Neg		AMPD2	CATATGCGCACCAGAGTGCA	22	88.1205	p53 CDE Neg		AMPD2	CATATGCGCACCAGAGTGCA	38	103.019	p53 CDE Neg		AMPD2	CATATGCGCACCAGAGTGCA	35	203.234	p53 CDE Neg		AMPD2	CATATGCGCACCAGAGTGCA	0	0	p53 CDE Neg		AMPD2	CATATGCGCACCAGAGTGCA	13	40.8321	p53 CDE Neg
AMPD2	CTACCGGAGTACCTGTCCCG	35	179.414	p53 CDE Neg		AMPD2	CTACCGGAGTACCTGTCCCG	37	141.913	p53 CDE Neg		AMPD2	CTACCGGAGTACCTGTCCCG	18	50.2496	p53 CDE Neg		AMPD2	CTACCGGAGTACCTGTCCCG	6	24.0329	p53 CDE Neg		AMPD2	CTACCGGAGTACCTGTCCCG	56	151.817	p53 CDE Neg		AMPD2	CTACCGGAGTACCTGTCCCG	19	110.327	p53 CDE Neg		AMPD2	CTACCGGAGTACCTGTCCCG	11	40.2432	p53 CDE Neg		AMPD2	CTACCGGAGTACCTGTCCCG	9	28.2684	p53 CDE Neg
AMPD2	GCTGAGCTTCCACACCTGGG	187	958.581	p53 CDE Neg		AMPD2	GCTGAGCTTCCACACCTGGG	250	958.872	p53 CDE Neg		AMPD2	GCTGAGCTTCCACACCTGGG	314	876.576	p53 CDE Neg		AMPD2	GCTGAGCTTCCACACCTGGG	162	648.888	p53 CDE Neg		AMPD2	GCTGAGCTTCCACACCTGGG	415	1125.07	p53 CDE Neg		AMPD2	GCTGAGCTTCCACACCTGGG	167	969.718	p53 CDE Neg		AMPD2	GCTGAGCTTCCACACCTGGG	293	1071.93	p53 CDE Neg		AMPD2	GCTGAGCTTCCACACCTGGG	274	860.615	p53 CDE Neg
AMPD2	GTAACTATGGATCTTACCAG	31	158.909	p53 CDE Neg		AMPD2	GTAACTATGGATCTTACCAG	52	199.445	p53 CDE Neg		AMPD2	GTAACTATGGATCTTACCAG	15	41.8746	p53 CDE Neg		AMPD2	GTAACTATGGATCTTACCAG	13	52.0712	p53 CDE Neg		AMPD2	GTAACTATGGATCTTACCAG	75	203.326	p53 CDE Neg		AMPD2	GTAACTATGGATCTTACCAG	15	87.1004	p53 CDE Neg		AMPD2	GTAACTATGGATCTTACCAG	0	0	p53 CDE Neg		AMPD2	GTAACTATGGATCTTACCAG	0	0	p53 CDE Neg
AMPD2	GTACAGGTACTGCAGGACGG	38	194.792	p53 CDE Neg		AMPD2	GTACAGGTACTGCAGGACGG	79	303.004	p53 CDE Neg		AMPD2	GTACAGGTACTGCAGGACGG	64	178.665	p53 CDE Neg		AMPD2	GTACAGGTACTGCAGGACGG	14	56.0767	p53 CDE Neg		AMPD2	GTACAGGTACTGCAGGACGG	74	200.615	p53 CDE Neg		AMPD2	GTACAGGTACTGCAGGACGG	17	98.7138	p53 CDE Neg		AMPD2	GTACAGGTACTGCAGGACGG	30	109.754	p53 CDE Neg		AMPD2	GTACAGGTACTGCAGGACGG	89	279.543	p53 CDE Neg
AMPD2	GTAGTACAGGTACTGCAGGA	32	164.035	p53 CDE Neg		AMPD2	GTAGTACAGGTACTGCAGGA	40	153.42	p53 CDE Neg		AMPD2	GTAGTACAGGTACTGCAGGA	64	178.665	p53 CDE Neg		AMPD2	GTAGTACAGGTACTGCAGGA	21	84.1151	p53 CDE Neg		AMPD2	GTAGTACAGGTACTGCAGGA	68	184.349	p53 CDE Neg		AMPD2	GTAGTACAGGTACTGCAGGA	47	272.915	p53 CDE Neg		AMPD2	GTAGTACAGGTACTGCAGGA	15	54.8771	p53 CDE Neg		AMPD2	GTAGTACAGGTACTGCAGGA	34	106.792	p53 CDE Neg
AMPD2	TCTTGATGAAGATCTCTCGG	63	322.944	p53 CDE Neg		AMPD2	TCTTGATGAAGATCTCTCGG	96	368.207	p53 CDE Neg		AMPD2	TCTTGATGAAGATCTCTCGG	82	228.915	p53 CDE Neg		AMPD2	TCTTGATGAAGATCTCTCGG	37	148.203	p53 CDE Neg		AMPD2	TCTTGATGAAGATCTCTCGG	166	450.029	p53 CDE Neg		AMPD2	TCTTGATGAAGATCTCTCGG	56	325.175	p53 CDE Neg		AMPD2	TCTTGATGAAGATCTCTCGG	49	179.265	p53 CDE Neg		AMPD2	TCTTGATGAAGATCTCTCGG	109	342.361	p53 CDE Neg
AMPD2	TGTAACTATGGATCTTACCA	20	102.522	p53 CDE Neg		AMPD2	TGTAACTATGGATCTTACCA	19	72.8743	p53 CDE Neg		AMPD2	TGTAACTATGGATCTTACCA	7	19.5415	p53 CDE Neg		AMPD2	TGTAACTATGGATCTTACCA	1	4.00548	p53 CDE Neg		AMPD2	TGTAACTATGGATCTTACCA	41	111.152	p53 CDE Neg		AMPD2	TGTAACTATGGATCTTACCA	15	87.1004	p53 CDE Neg		AMPD2	TGTAACTATGGATCTTACCA	0	0	p53 CDE Neg		AMPD2	TGTAACTATGGATCTTACCA	0	0	p53 CDE Neg
ANAPC10	TGGAAAGGACTGGAACAGTA	45	230.675	p53 CDE Neg		ANAPC10	TGGAAAGGACTGGAACAGTA	33	126.571	p53 CDE Neg		ANAPC10	TGGAAAGGACTGGAACAGTA	19	53.0412	p53 CDE Neg		ANAPC10	TGGAAAGGACTGGAACAGTA	3	12.0164	p53 CDE Neg		ANAPC10	TGGAAAGGACTGGAACAGTA	53	143.684	p53 CDE Neg		ANAPC10	TGGAAAGGACTGGAACAGTA	31	180.008	p53 CDE Neg		ANAPC10	TGGAAAGGACTGGAACAGTA	9	32.9263	p53 CDE Neg		ANAPC10	TGGAAAGGACTGGAACAGTA	6	18.8456	p53 CDE Neg
ANAPC10	TGTATCATGAATGTACGAGT	47	240.927	p53 CDE Neg		ANAPC10	TGTATCATGAATGTACGAGT	87	333.687	p53 CDE Neg		ANAPC10	TGTATCATGAATGTACGAGT	102	284.748	p53 CDE Neg		ANAPC10	TGTATCATGAATGTACGAGT	58	232.318	p53 CDE Neg		ANAPC10	TGTATCATGAATGTACGAGT	126	341.588	p53 CDE Neg		ANAPC10	TGTATCATGAATGTACGAGT	58	336.788	p53 CDE Neg		ANAPC10	TGTATCATGAATGTACGAGT	18	65.8525	p53 CDE Neg		ANAPC10	TGTATCATGAATGTACGAGT	59	185.315	p53 CDE Neg
ANAPC10	AATTGGATGTTCACTAAATG	29	148.657	p53 CDE Neg		ANAPC10	AATTGGATGTTCACTAAATG	46	176.432	p53 CDE Neg		ANAPC10	AATTGGATGTTCACTAAATG	50	139.582	p53 CDE Neg		ANAPC10	AATTGGATGTTCACTAAATG	37	148.203	p53 CDE Neg		ANAPC10	AATTGGATGTTCACTAAATG	55	149.106	p53 CDE Neg		ANAPC10	AATTGGATGTTCACTAAATG	33	191.621	p53 CDE Neg		ANAPC10	AATTGGATGTTCACTAAATG	0	0	p53 CDE Neg		ANAPC10	AATTGGATGTTCACTAAATG	0	0	p53 CDE Neg
ANAPC10	ACACCAAACAAGACACCTCC	45	230.675	p53 CDE Neg		ANAPC10	ACACCAAACAAGACACCTCC	34	130.407	p53 CDE Neg		ANAPC10	ACACCAAACAAGACACCTCC	115	321.039	p53 CDE Neg		ANAPC10	ACACCAAACAAGACACCTCC	64	256.351	p53 CDE Neg		ANAPC10	ACACCAAACAAGACACCTCC	73	197.904	p53 CDE Neg		ANAPC10	ACACCAAACAAGACACCTCC	42	243.881	p53 CDE Neg		ANAPC10	ACACCAAACAAGACACCTCC	6	21.9508	p53 CDE Neg		ANAPC10	ACACCAAACAAGACACCTCC	10	31.4093	p53 CDE Neg
ANAPC10	ACATCTAGGAAATTTACCAA	51	261.431	p53 CDE Neg		ANAPC10	ACATCTAGGAAATTTACCAA	111	425.739	p53 CDE Neg		ANAPC10	ACATCTAGGAAATTTACCAA	137	382.455	p53 CDE Neg		ANAPC10	ACATCTAGGAAATTTACCAA	72	288.395	p53 CDE Neg		ANAPC10	ACATCTAGGAAATTTACCAA	121	328.033	p53 CDE Neg		ANAPC10	ACATCTAGGAAATTTACCAA	68	394.855	p53 CDE Neg		ANAPC10	ACATCTAGGAAATTTACCAA	88	321.946	p53 CDE Neg		ANAPC10	ACATCTAGGAAATTTACCAA	242	760.105	p53 CDE Neg
ANAPC10	CTGACCCCAAGCAGTTGGAA	24	123.026	p53 CDE Neg		ANAPC10	CTGACCCCAAGCAGTTGGAA	28	107.394	p53 CDE Neg		ANAPC10	CTGACCCCAAGCAGTTGGAA	30	83.7493	p53 CDE Neg		ANAPC10	CTGACCCCAAGCAGTTGGAA	42	168.23	p53 CDE Neg		ANAPC10	CTGACCCCAAGCAGTTGGAA	47	127.418	p53 CDE Neg		ANAPC10	CTGACCCCAAGCAGTTGGAA	18	104.521	p53 CDE Neg		ANAPC10	CTGACCCCAAGCAGTTGGAA	12	43.9017	p53 CDE Neg		ANAPC10	CTGACCCCAAGCAGTTGGAA	9	28.2684	p53 CDE Neg
ANAPC10	CTTGAGTTGGTGGAACCAAG	55	281.936	p53 CDE Neg		ANAPC10	CTTGAGTTGGTGGAACCAAG	75	287.662	p53 CDE Neg		ANAPC10	CTTGAGTTGGTGGAACCAAG	30	83.7493	p53 CDE Neg		ANAPC10	CTTGAGTTGGTGGAACCAAG	40	160.219	p53 CDE Neg		ANAPC10	CTTGAGTTGGTGGAACCAAG	103	279.235	p53 CDE Neg		ANAPC10	CTTGAGTTGGTGGAACCAAG	73	423.889	p53 CDE Neg		ANAPC10	CTTGAGTTGGTGGAACCAAG	0	0	p53 CDE Neg		ANAPC10	CTTGAGTTGGTGGAACCAAG	31	97.3688	p53 CDE Neg
ANAPC10	GAAACTTATTGGCAATCAGA	74	379.332	p53 CDE Neg		ANAPC10	GAAACTTATTGGCAATCAGA	101	387.384	p53 CDE Neg		ANAPC10	GAAACTTATTGGCAATCAGA	132	368.497	p53 CDE Neg		ANAPC10	GAAACTTATTGGCAATCAGA	81	324.444	p53 CDE Neg		ANAPC10	GAAACTTATTGGCAATCAGA	160	433.763	p53 CDE Neg		ANAPC10	GAAACTTATTGGCAATCAGA	69	400.662	p53 CDE Neg		ANAPC10	GAAACTTATTGGCAATCAGA	88	321.946	p53 CDE Neg		ANAPC10	GAAACTTATTGGCAATCAGA	43	135.06	p53 CDE Neg
ANAPC10	GATGTTCACTAAATGAGGCT	68	348.575	p53 CDE Neg		ANAPC10	GATGTTCACTAAATGAGGCT	76	291.497	p53 CDE Neg		ANAPC10	GATGTTCACTAAATGAGGCT	59	164.707	p53 CDE Neg		ANAPC10	GATGTTCACTAAATGAGGCT	31	124.17	p53 CDE Neg		ANAPC10	GATGTTCACTAAATGAGGCT	113	306.345	p53 CDE Neg		ANAPC10	GATGTTCACTAAATGAGGCT	62	360.015	p53 CDE Neg		ANAPC10	GATGTTCACTAAATGAGGCT	131	479.26	p53 CDE Neg		ANAPC10	GATGTTCACTAAATGAGGCT	14	43.973	p53 CDE Neg
ANAPC10	GCACCAGGAGGTGTCTTGTT	24	123.026	p53 CDE Neg		ANAPC10	GCACCAGGAGGTGTCTTGTT	50	191.774	p53 CDE Neg		ANAPC10	GCACCAGGAGGTGTCTTGTT	134	374.08	p53 CDE Neg		ANAPC10	GCACCAGGAGGTGTCTTGTT	37	148.203	p53 CDE Neg		ANAPC10	GCACCAGGAGGTGTCTTGTT	92	249.414	p53 CDE Neg		ANAPC10	GCACCAGGAGGTGTCTTGTT	45	261.301	p53 CDE Neg		ANAPC10	GCACCAGGAGGTGTCTTGTT	361	1320.71	p53 CDE Neg		ANAPC10	GCACCAGGAGGTGTCTTGTT	652	2047.89	p53 CDE Neg
ANAPC11	AAAGGTCACATGAATGGTCA	51	261.431	p53 CDE Neg		ANAPC11	AAAGGTCACATGAATGGTCA	62	237.8	p53 CDE Neg		ANAPC11	AAAGGTCACATGAATGGTCA	46	128.416	p53 CDE Neg		ANAPC11	AAAGGTCACATGAATGGTCA	51	204.279	p53 CDE Neg		ANAPC11	AAAGGTCACATGAATGGTCA	67	181.638	p53 CDE Neg		ANAPC11	AAAGGTCACATGAATGGTCA	41	238.074	p53 CDE Neg		ANAPC11	AAAGGTCACATGAATGGTCA	21	76.828	p53 CDE Neg		ANAPC11	AAAGGTCACATGAATGGTCA	1	3.14093	p53 CDE Neg
ANAPC11	CATGAATGGTCAAGGCACCA	0	0	p53 CDE Neg		ANAPC11	CATGAATGGTCAAGGCACCA	0	0	p53 CDE Neg		ANAPC11	CATGAATGGTCAAGGCACCA	4	11.1666	p53 CDE Neg		ANAPC11	CATGAATGGTCAAGGCACCA	0	0	p53 CDE Neg		ANAPC11	CATGAATGGTCAAGGCACCA	3	8.13306	p53 CDE Neg		ANAPC11	CATGAATGGTCAAGGCACCA	0	0	p53 CDE Neg		ANAPC11	CATGAATGGTCAAGGCACCA	5	18.2924	p53 CDE Neg		ANAPC11	CATGAATGGTCAAGGCACCA	0	0	p53 CDE Neg
ANAPC11	CGTGGCCACTTGGCTCTGGG	70	358.827	p53 CDE Neg		ANAPC11	CGTGGCCACTTGGCTCTGGG	95	364.371	p53 CDE Neg		ANAPC11	CGTGGCCACTTGGCTCTGGG	169	471.788	p53 CDE Neg		ANAPC11	CGTGGCCACTTGGCTCTGGG	46	184.252	p53 CDE Neg		ANAPC11	CGTGGCCACTTGGCTCTGGG	112	303.634	p53 CDE Neg		ANAPC11	CGTGGCCACTTGGCTCTGGG	57	330.982	p53 CDE Neg		ANAPC11	CGTGGCCACTTGGCTCTGGG	10	36.5847	p53 CDE Neg		ANAPC11	CGTGGCCACTTGGCTCTGGG	42	131.919	p53 CDE Neg
ANAPC11	CTTCAGCTCATCGAATCGAA	70	358.827	p53 CDE Neg		ANAPC11	CTTCAGCTCATCGAATCGAA	85	326.017	p53 CDE Neg		ANAPC11	CTTCAGCTCATCGAATCGAA	47	131.207	p53 CDE Neg		ANAPC11	CTTCAGCTCATCGAATCGAA	49	196.268	p53 CDE Neg		ANAPC11	CTTCAGCTCATCGAATCGAA	134	363.277	p53 CDE Neg		ANAPC11	CTTCAGCTCATCGAATCGAA	46	267.108	p53 CDE Neg		ANAPC11	CTTCAGCTCATCGAATCGAA	103	376.823	p53 CDE Neg		ANAPC11	CTTCAGCTCATCGAATCGAA	90	282.684	p53 CDE Neg
ANAPC11	GAAATGCTTTCTCCATGGAG	46	235.801	p53 CDE Neg		ANAPC11	GAAATGCTTTCTCCATGGAG	66	253.142	p53 CDE Neg		ANAPC11	GAAATGCTTTCTCCATGGAG	73	203.79	p53 CDE Neg		ANAPC11	GAAATGCTTTCTCCATGGAG	120	480.658	p53 CDE Neg		ANAPC11	GAAATGCTTTCTCCATGGAG	39	105.73	p53 CDE Neg		ANAPC11	GAAATGCTTTCTCCATGGAG	19	110.327	p53 CDE Neg		ANAPC11	GAAATGCTTTCTCCATGGAG	0	0	p53 CDE Neg		ANAPC11	GAAATGCTTTCTCCATGGAG	0	0	p53 CDE Neg
ANAPC11	GCTCTCAGAATCCTGAAGGA	45	230.675	p53 CDE Neg		ANAPC11	GCTCTCAGAATCCTGAAGGA	48	184.103	p53 CDE Neg		ANAPC11	GCTCTCAGAATCCTGAAGGA	69	192.623	p53 CDE Neg		ANAPC11	GCTCTCAGAATCCTGAAGGA	64	256.351	p53 CDE Neg		ANAPC11	GCTCTCAGAATCCTGAAGGA	52	140.973	p53 CDE Neg		ANAPC11	GCTCTCAGAATCCTGAAGGA	23	133.554	p53 CDE Neg		ANAPC11	GCTCTCAGAATCCTGAAGGA	33	120.73	p53 CDE Neg		ANAPC11	GCTCTCAGAATCCTGAAGGA	119	373.771	p53 CDE Neg
ANAPC11	GGATGCTCTCAGAATCCTGA	21	107.648	p53 CDE Neg		ANAPC11	GGATGCTCTCAGAATCCTGA	37	141.913	p53 CDE Neg		ANAPC11	GGATGCTCTCAGAATCCTGA	5	13.9582	p53 CDE Neg		ANAPC11	GGATGCTCTCAGAATCCTGA	9	36.0493	p53 CDE Neg		ANAPC11	GGATGCTCTCAGAATCCTGA	45	121.996	p53 CDE Neg		ANAPC11	GGATGCTCTCAGAATCCTGA	17	98.7138	p53 CDE Neg		ANAPC11	GGATGCTCTCAGAATCCTGA	14	51.2186	p53 CDE Neg		ANAPC11	GGATGCTCTCAGAATCCTGA	0	0	p53 CDE Neg
ANAPC11	GTGAAGATTAAGTGCTGGAA	55	281.936	p53 CDE Neg		ANAPC11	GTGAAGATTAAGTGCTGGAA	67	256.978	p53 CDE Neg		ANAPC11	GTGAAGATTAAGTGCTGGAA	109	304.289	p53 CDE Neg		ANAPC11	GTGAAGATTAAGTGCTGGAA	15	60.0822	p53 CDE Neg		ANAPC11	GTGAAGATTAAGTGCTGGAA	54	146.395	p53 CDE Neg		ANAPC11	GTGAAGATTAAGTGCTGGAA	26	150.974	p53 CDE Neg		ANAPC11	GTGAAGATTAAGTGCTGGAA	0	0	p53 CDE Neg		ANAPC11	GTGAAGATTAAGTGCTGGAA	8	25.1274	p53 CDE Neg
ANAPC11	GTGGCCAACGATGAGAACTG	142	727.906	p53 CDE Neg		ANAPC11	GTGGCCAACGATGAGAACTG	249	955.037	p53 CDE Neg		ANAPC11	GTGGCCAACGATGAGAACTG	4	11.1666	p53 CDE Neg		ANAPC11	GTGGCCAACGATGAGAACTG	14	56.0767	p53 CDE Neg		ANAPC11	GTGGCCAACGATGAGAACTG	331	897.347	p53 CDE Neg		ANAPC11	GTGGCCAACGATGAGAACTG	145	841.971	p53 CDE Neg		ANAPC11	GTGGCCAACGATGAGAACTG	12	43.9017	p53 CDE Neg		ANAPC11	GTGGCCAACGATGAGAACTG	9	28.2684	p53 CDE Neg
ANAPC11	TCTTTAGCCTCACAACAAGA	24	123.026	p53 CDE Neg		ANAPC11	TCTTTAGCCTCACAACAAGA	32	122.736	p53 CDE Neg		ANAPC11	TCTTTAGCCTCACAACAAGA	22	61.4161	p53 CDE Neg		ANAPC11	TCTTTAGCCTCACAACAAGA	34	136.186	p53 CDE Neg		ANAPC11	TCTTTAGCCTCACAACAAGA	36	97.5967	p53 CDE Neg		ANAPC11	TCTTTAGCCTCACAACAAGA	31	180.008	p53 CDE Neg		ANAPC11	TCTTTAGCCTCACAACAAGA	0	0	p53 CDE Neg		ANAPC11	TCTTTAGCCTCACAACAAGA	33	103.651	p53 CDE Neg
ANKRD17	AATACTCCTGGGTCAGACAT	29	148.657	p53 CDE Pos		ANKRD17	AATACTCCTGGGTCAGACAT	68	260.813	p53 CDE Pos		ANKRD17	AATACTCCTGGGTCAGACAT	34	94.9159	p53 CDE Pos		ANKRD17	AATACTCCTGGGTCAGACAT	28	112.153	p53 CDE Pos		ANKRD17	AATACTCCTGGGTCAGACAT	79	214.17	p53 CDE Pos		ANKRD17	AATACTCCTGGGTCAGACAT	33	191.621	p53 CDE Pos		ANKRD17	AATACTCCTGGGTCAGACAT	10	36.5847	p53 CDE Pos		ANKRD17	AATACTCCTGGGTCAGACAT	1	3.14093	p53 CDE Pos
ANKRD17	AGATGGTGCACGAACTCCCG	31	158.909	p53 CDE Pos		ANKRD17	AGATGGTGCACGAACTCCCG	18	69.0388	p53 CDE Pos		ANKRD17	AGATGGTGCACGAACTCCCG	7	19.5415	p53 CDE Pos		ANKRD17	AGATGGTGCACGAACTCCCG	18	72.0986	p53 CDE Pos		ANKRD17	AGATGGTGCACGAACTCCCG	49	132.84	p53 CDE Pos		ANKRD17	AGATGGTGCACGAACTCCCG	9	52.2603	p53 CDE Pos		ANKRD17	AGATGGTGCACGAACTCCCG	0	0	p53 CDE Pos		ANKRD17	AGATGGTGCACGAACTCCCG	0	0	p53 CDE Pos
ANKRD17	ATATTGTCATGTTACAGAGG	86	440.845	p53 CDE Pos		ANKRD17	ATATTGTCATGTTACAGAGG	118	452.588	p53 CDE Pos		ANKRD17	ATATTGTCATGTTACAGAGG	34	94.9159	p53 CDE Pos		ANKRD17	ATATTGTCATGTTACAGAGG	32	128.175	p53 CDE Pos		ANKRD17	ATATTGTCATGTTACAGAGG	194	525.938	p53 CDE Pos		ANKRD17	ATATTGTCATGTTACAGAGG	74	429.695	p53 CDE Pos		ANKRD17	ATATTGTCATGTTACAGAGG	22	80.4864	p53 CDE Pos		ANKRD17	ATATTGTCATGTTACAGAGG	3	9.42279	p53 CDE Pos
ANKRD17	ATTCTAGTCATAAGAAGGAA	27	138.405	p53 CDE Pos		ANKRD17	ATTCTAGTCATAAGAAGGAA	28	107.394	p53 CDE Pos		ANKRD17	ATTCTAGTCATAAGAAGGAA	67	187.04	p53 CDE Pos		ANKRD17	ATTCTAGTCATAAGAAGGAA	43	172.236	p53 CDE Pos		ANKRD17	ATTCTAGTCATAAGAAGGAA	37	100.308	p53 CDE Pos		ANKRD17	ATTCTAGTCATAAGAAGGAA	17	98.7138	p53 CDE Pos		ANKRD17	ATTCTAGTCATAAGAAGGAA	8	29.2678	p53 CDE Pos		ANKRD17	ATTCTAGTCATAAGAAGGAA	9	28.2684	p53 CDE Pos
ANKRD17	CACAGACCGATGTCTGACCC	38	194.792	p53 CDE Pos		ANKRD17	CACAGACCGATGTCTGACCC	31	118.9	p53 CDE Pos		ANKRD17	CACAGACCGATGTCTGACCC	27	75.3744	p53 CDE Pos		ANKRD17	CACAGACCGATGTCTGACCC	15	60.0822	p53 CDE Pos		ANKRD17	CACAGACCGATGTCTGACCC	43	116.574	p53 CDE Pos		ANKRD17	CACAGACCGATGTCTGACCC	14	81.2937	p53 CDE Pos		ANKRD17	CACAGACCGATGTCTGACCC	48	175.607	p53 CDE Pos		ANKRD17	CACAGACCGATGTCTGACCC	17	53.3958	p53 CDE Pos
ANKRD17	GAGAAACACCAATTTCCGAG	73	374.205	p53 CDE Pos		ANKRD17	GAGAAACACCAATTTCCGAG	96	368.207	p53 CDE Pos		ANKRD17	GAGAAACACCAATTTCCGAG	22	61.4161	p53 CDE Pos		ANKRD17	GAGAAACACCAATTTCCGAG	42	168.23	p53 CDE Pos		ANKRD17	GAGAAACACCAATTTCCGAG	96	260.258	p53 CDE Pos		ANKRD17	GAGAAACACCAATTTCCGAG	60	348.402	p53 CDE Pos		ANKRD17	GAGAAACACCAATTTCCGAG	0	0	p53 CDE Pos		ANKRD17	GAGAAACACCAATTTCCGAG	0	0	p53 CDE Pos
ANKRD17	GATGGTTTCGAAACATAAAG	16	82.0176	p53 CDE Pos		ANKRD17	GATGGTTTCGAAACATAAAG	29	111.229	p53 CDE Pos		ANKRD17	GATGGTTTCGAAACATAAAG	29	80.9576	p53 CDE Pos		ANKRD17	GATGGTTTCGAAACATAAAG	8	32.0438	p53 CDE Pos		ANKRD17	GATGGTTTCGAAACATAAAG	36	97.5967	p53 CDE Pos		ANKRD17	GATGGTTTCGAAACATAAAG	13	75.487	p53 CDE Pos		ANKRD17	GATGGTTTCGAAACATAAAG	0	0	p53 CDE Pos		ANKRD17	GATGGTTTCGAAACATAAAG	0	0	p53 CDE Pos
ANKRD17	TCAGGGATAGGTGCTACTGG	54	276.81	p53 CDE Pos		ANKRD17	TCAGGGATAGGTGCTACTGG	43	164.926	p53 CDE Pos		ANKRD17	TCAGGGATAGGTGCTACTGG	34	94.9159	p53 CDE Pos		ANKRD17	TCAGGGATAGGTGCTACTGG	32	128.175	p53 CDE Pos		ANKRD17	TCAGGGATAGGTGCTACTGG	90	243.992	p53 CDE Pos		ANKRD17	TCAGGGATAGGTGCTACTGG	32	185.814	p53 CDE Pos		ANKRD17	TCAGGGATAGGTGCTACTGG	25	91.4619	p53 CDE Pos		ANKRD17	TCAGGGATAGGTGCTACTGG	12	37.6912	p53 CDE Pos
ANKRD17	TGCTGATGGAATGTACCAGA	20	102.522	p53 CDE Pos		ANKRD17	TGCTGATGGAATGTACCAGA	63	241.636	p53 CDE Pos		ANKRD17	TGCTGATGGAATGTACCAGA	47	131.207	p53 CDE Pos		ANKRD17	TGCTGATGGAATGTACCAGA	27	108.148	p53 CDE Pos		ANKRD17	TGCTGATGGAATGTACCAGA	67	181.638	p53 CDE Pos		ANKRD17	TGCTGATGGAATGTACCAGA	37	214.848	p53 CDE Pos		ANKRD17	TGCTGATGGAATGTACCAGA	1	3.65847	p53 CDE Pos		ANKRD17	TGCTGATGGAATGTACCAGA	0	0	p53 CDE Pos
ANKRD17	TTTGCTTCAAACATTTCAGG	49	251.179	p53 CDE Pos		ANKRD17	TTTGCTTCAAACATTTCAGG	39	149.584	p53 CDE Pos		ANKRD17	TTTGCTTCAAACATTTCAGG	67	187.04	p53 CDE Pos		ANKRD17	TTTGCTTCAAACATTTCAGG	54	216.296	p53 CDE Pos		ANKRD17	TTTGCTTCAAACATTTCAGG	90	243.992	p53 CDE Pos		ANKRD17	TTTGCTTCAAACATTTCAGG	58	336.788	p53 CDE Pos		ANKRD17	TTTGCTTCAAACATTTCAGG	46	168.29	p53 CDE Pos		ANKRD17	TTTGCTTCAAACATTTCAGG	38	119.355	p53 CDE Pos
ANKRD49	AAAGTGTTCAGAAAAATCCA	69	353.701	p53 CDE Pos		ANKRD49	AAAGTGTTCAGAAAAATCCA	92	352.865	p53 CDE Pos		ANKRD49	AAAGTGTTCAGAAAAATCCA	177	494.121	p53 CDE Pos		ANKRD49	AAAGTGTTCAGAAAAATCCA	101	404.553	p53 CDE Pos		ANKRD49	AAAGTGTTCAGAAAAATCCA	119	322.611	p53 CDE Pos		ANKRD49	AAAGTGTTCAGAAAAATCCA	59	342.595	p53 CDE Pos		ANKRD49	AAAGTGTTCAGAAAAATCCA	719	2630.44	p53 CDE Pos		ANKRD49	AAAGTGTTCAGAAAAATCCA	1011	3175.48	p53 CDE Pos
ANKRD49	AGGCAATTCTGATGAAGATG	152	779.168	p53 CDE Pos		ANKRD49	AGGCAATTCTGATGAAGATG	241	924.353	p53 CDE Pos		ANKRD49	AGGCAATTCTGATGAAGATG	303	845.868	p53 CDE Pos		ANKRD49	AGGCAATTCTGATGAAGATG	228	913.249	p53 CDE Pos		ANKRD49	AGGCAATTCTGATGAAGATG	330	894.636	p53 CDE Pos		ANKRD49	AGGCAATTCTGATGAAGATG	166	963.911	p53 CDE Pos		ANKRD49	AGGCAATTCTGATGAAGATG	176	643.891	p53 CDE Pos		ANKRD49	AGGCAATTCTGATGAAGATG	268	841.769	p53 CDE Pos
ANKRD49	CAAAGACTTTGAGTACCAGT	48	246.053	p53 CDE Pos		ANKRD49	CAAAGACTTTGAGTACCAGT	29	111.229	p53 CDE Pos		ANKRD49	CAAAGACTTTGAGTACCAGT	66	184.248	p53 CDE Pos		ANKRD49	CAAAGACTTTGAGTACCAGT	20	80.1096	p53 CDE Pos		ANKRD49	CAAAGACTTTGAGTACCAGT	61	165.372	p53 CDE Pos		ANKRD49	CAAAGACTTTGAGTACCAGT	15	87.1004	p53 CDE Pos		ANKRD49	CAAAGACTTTGAGTACCAGT	48	175.607	p53 CDE Pos		ANKRD49	CAAAGACTTTGAGTACCAGT	38	119.355	p53 CDE Pos
ANKRD49	CTTCTCAGCTTACCACAGTG	81	415.214	p53 CDE Pos		ANKRD49	CTTCTCAGCTTACCACAGTG	76	291.497	p53 CDE Pos		ANKRD49	CTTCTCAGCTTACCACAGTG	28	78.166	p53 CDE Pos		ANKRD49	CTTCTCAGCTTACCACAGTG	18	72.0986	p53 CDE Pos		ANKRD49	CTTCTCAGCTTACCACAGTG	101	273.813	p53 CDE Pos		ANKRD49	CTTCTCAGCTTACCACAGTG	47	272.915	p53 CDE Pos		ANKRD49	CTTCTCAGCTTACCACAGTG	0	0	p53 CDE Pos		ANKRD49	CTTCTCAGCTTACCACAGTG	0	0	p53 CDE Pos
ANKRD49	CTTGAATTGTTGGAAACACA	31	158.909	p53 CDE Pos		ANKRD49	CTTGAATTGTTGGAAACACA	35	134.242	p53 CDE Pos		ANKRD49	CTTGAATTGTTGGAAACACA	82	228.915	p53 CDE Pos		ANKRD49	CTTGAATTGTTGGAAACACA	32	128.175	p53 CDE Pos		ANKRD49	CTTGAATTGTTGGAAACACA	33	89.4636	p53 CDE Pos		ANKRD49	CTTGAATTGTTGGAAACACA	31	180.008	p53 CDE Pos		ANKRD49	CTTGAATTGTTGGAAACACA	104	380.481	p53 CDE Pos		ANKRD49	CTTGAATTGTTGGAAACACA	217	681.582	p53 CDE Pos
ANKRD49	GCCCAAAGAAGCAATCTGCT	29	148.657	p53 CDE Pos		ANKRD49	GCCCAAAGAAGCAATCTGCT	9	34.5194	p53 CDE Pos		ANKRD49	GCCCAAAGAAGCAATCTGCT	28	78.166	p53 CDE Pos		ANKRD49	GCCCAAAGAAGCAATCTGCT	5	20.0274	p53 CDE Pos		ANKRD49	GCCCAAAGAAGCAATCTGCT	34	92.1746	p53 CDE Pos		ANKRD49	GCCCAAAGAAGCAATCTGCT	15	87.1004	p53 CDE Pos		ANKRD49	GCCCAAAGAAGCAATCTGCT	25	91.4619	p53 CDE Pos		ANKRD49	GCCCAAAGAAGCAATCTGCT	144	452.294	p53 CDE Pos
ANKRD49	GGCCACTCACGTGAACACTA	22	112.774	p53 CDE Pos		ANKRD49	GGCCACTCACGTGAACACTA	83	318.346	p53 CDE Pos		ANKRD49	GGCCACTCACGTGAACACTA	107	298.706	p53 CDE Pos		ANKRD49	GGCCACTCACGTGAACACTA	69	276.378	p53 CDE Pos		ANKRD49	GGCCACTCACGTGAACACTA	90	243.992	p53 CDE Pos		ANKRD49	GGCCACTCACGTGAACACTA	31	180.008	p53 CDE Pos		ANKRD49	GGCCACTCACGTGAACACTA	0	0	p53 CDE Pos		ANKRD49	GGCCACTCACGTGAACACTA	0	0	p53 CDE Pos
ANKRD49	GTAGGCTGCTCGATGAAGAG	45	230.675	p53 CDE Pos		ANKRD49	GTAGGCTGCTCGATGAAGAG	48	184.103	p53 CDE Pos		ANKRD49	GTAGGCTGCTCGATGAAGAG	14	39.083	p53 CDE Pos		ANKRD49	GTAGGCTGCTCGATGAAGAG	37	148.203	p53 CDE Pos		ANKRD49	GTAGGCTGCTCGATGAAGAG	84	227.726	p53 CDE Pos		ANKRD49	GTAGGCTGCTCGATGAAGAG	13	75.487	p53 CDE Pos		ANKRD49	GTAGGCTGCTCGATGAAGAG	0	0	p53 CDE Pos		ANKRD49	GTAGGCTGCTCGATGAAGAG	0	0	p53 CDE Pos
ANKRD49	GTGTTTCCAACAATTCAAGT	0	0	p53 CDE Pos		ANKRD49	GTGTTTCCAACAATTCAAGT	0	0	p53 CDE Pos		ANKRD49	GTGTTTCCAACAATTCAAGT	0	0	p53 CDE Pos		ANKRD49	GTGTTTCCAACAATTCAAGT	0	0	p53 CDE Pos		ANKRD49	GTGTTTCCAACAATTCAAGT	0	0	p53 CDE Pos		ANKRD49	GTGTTTCCAACAATTCAAGT	0	0	p53 CDE Pos		ANKRD49	GTGTTTCCAACAATTCAAGT	0	0	p53 CDE Pos		ANKRD49	GTGTTTCCAACAATTCAAGT	0	0	p53 CDE Pos
ANKRD49	GTGTTTCCAACAATTCAAGT	0	0	p53 CDE Pos		ANKRD49	GTGTTTCCAACAATTCAAGT	0	0	p53 CDE Pos		ANKRD49	GTGTTTCCAACAATTCAAGT	0	0	p53 CDE Pos		ANKRD49	GTGTTTCCAACAATTCAAGT	0	0	p53 CDE Pos		ANKRD49	GTGTTTCCAACAATTCAAGT	0	0	p53 CDE Pos		ANKRD49	GTGTTTCCAACAATTCAAGT	0	0	p53 CDE Pos		ANKRD49	GTGTTTCCAACAATTCAAGT	0	0	p53 CDE Pos		ANKRD49	GTGTTTCCAACAATTCAAGT	0	0	p53 CDE Pos
AP2M1	CAACTTTAAACCCTCACTGC	10	51.261	p53 CDE Neutral		AP2M1	CAACTTTAAACCCTCACTGC	14	53.6968	p53 CDE Neutral		AP2M1	CAACTTTAAACCCTCACTGC	64	178.665	p53 CDE Neutral		AP2M1	CAACTTTAAACCCTCACTGC	17	68.0932	p53 CDE Neutral		AP2M1	CAACTTTAAACCCTCACTGC	8	21.6882	p53 CDE Neutral		AP2M1	CAACTTTAAACCCTCACTGC	8	46.4536	p53 CDE Neutral		AP2M1	CAACTTTAAACCCTCACTGC	4	14.6339	p53 CDE Neutral		AP2M1	CAACTTTAAACCCTCACTGC	17	53.3958	p53 CDE Neutral
AP2M1	CCAGCTTCTTCCACGTTAAG	11	56.3871	p53 CDE Neutral		AP2M1	CCAGCTTCTTCCACGTTAAG	49	187.939	p53 CDE Neutral		AP2M1	CCAGCTTCTTCCACGTTAAG	53	147.957	p53 CDE Neutral		AP2M1	CCAGCTTCTTCCACGTTAAG	24	96.1315	p53 CDE Neutral		AP2M1	CCAGCTTCTTCCACGTTAAG	59	159.95	p53 CDE Neutral		AP2M1	CCAGCTTCTTCCACGTTAAG	46	267.108	p53 CDE Neutral		AP2M1	CCAGCTTCTTCCACGTTAAG	159	581.697	p53 CDE Neutral		AP2M1	CCAGCTTCTTCCACGTTAAG	22	69.1005	p53 CDE Neutral
AP2M1	CTACTTTGGCAAGATCAGCG	29	148.657	p53 CDE Neutral		AP2M1	CTACTTTGGCAAGATCAGCG	48	184.103	p53 CDE Neutral		AP2M1	CTACTTTGGCAAGATCAGCG	67	187.04	p53 CDE Neutral		AP2M1	CTACTTTGGCAAGATCAGCG	44	176.241	p53 CDE Neutral		AP2M1	CTACTTTGGCAAGATCAGCG	62	168.083	p53 CDE Neutral		AP2M1	CTACTTTGGCAAGATCAGCG	25	145.167	p53 CDE Neutral		AP2M1	CTACTTTGGCAAGATCAGCG	0	0	p53 CDE Neutral		AP2M1	CTACTTTGGCAAGATCAGCG	0	0	p53 CDE Neutral
AP2M1	GAGAGGGTATCAAGTATCGT	58	297.314	p53 CDE Neutral		AP2M1	GAGAGGGTATCAAGTATCGT	62	237.8	p53 CDE Neutral		AP2M1	GAGAGGGTATCAAGTATCGT	50	139.582	p53 CDE Neutral		AP2M1	GAGAGGGTATCAAGTATCGT	13	52.0712	p53 CDE Neutral		AP2M1	GAGAGGGTATCAAGTATCGT	81	219.593	p53 CDE Neutral		AP2M1	GAGAGGGTATCAAGTATCGT	58	336.788	p53 CDE Neutral		AP2M1	GAGAGGGTATCAAGTATCGT	0	0	p53 CDE Neutral		AP2M1	GAGAGGGTATCAAGTATCGT	8	25.1274	p53 CDE Neutral
AP2M1	GATCCCGCTAGTGCGAGAAG	33	169.161	p53 CDE Neutral		AP2M1	GATCCCGCTAGTGCGAGAAG	63	241.636	p53 CDE Neutral		AP2M1	GATCCCGCTAGTGCGAGAAG	95	265.206	p53 CDE Neutral		AP2M1	GATCCCGCTAGTGCGAGAAG	218	873.195	p53 CDE Neutral		AP2M1	GATCCCGCTAGTGCGAGAAG	76	206.037	p53 CDE Neutral		AP2M1	GATCCCGCTAGTGCGAGAAG	33	191.621	p53 CDE Neutral		AP2M1	GATCCCGCTAGTGCGAGAAG	116	424.383	p53 CDE Neutral		AP2M1	GATCCCGCTAGTGCGAGAAG	128	402.039	p53 CDE Neutral
AP2M1	GATCTTCTGAGCCAGCAGTG	41	210.17	p53 CDE Neutral		AP2M1	GATCTTCTGAGCCAGCAGTG	46	176.432	p53 CDE Neutral		AP2M1	GATCTTCTGAGCCAGCAGTG	32	89.3326	p53 CDE Neutral		AP2M1	GATCTTCTGAGCCAGCAGTG	27	108.148	p53 CDE Neutral		AP2M1	GATCTTCTGAGCCAGCAGTG	68	184.349	p53 CDE Neutral		AP2M1	GATCTTCTGAGCCAGCAGTG	42	243.881	p53 CDE Neutral		AP2M1	GATCTTCTGAGCCAGCAGTG	36	131.705	p53 CDE Neutral		AP2M1	GATCTTCTGAGCCAGCAGTG	19	59.6777	p53 CDE Neutral
AP2M1	GGTAGCTCTTCATCACCACC	0	0	p53 CDE Neutral		AP2M1	GGTAGCTCTTCATCACCACC	0	0	p53 CDE Neutral		AP2M1	GGTAGCTCTTCATCACCACC	0	0	p53 CDE Neutral		AP2M1	GGTAGCTCTTCATCACCACC	0	0	p53 CDE Neutral		AP2M1	GGTAGCTCTTCATCACCACC	0	0	p53 CDE Neutral		AP2M1	GGTAGCTCTTCATCACCACC	0	0	p53 CDE Neutral		AP2M1	GGTAGCTCTTCATCACCACC	0	0	p53 CDE Neutral		AP2M1	GGTAGCTCTTCATCACCACC	0	0	p53 CDE Neutral
AP2M1	GGTAGCTCTTCATCACCACC	0	0	p53 CDE Neutral		AP2M1	GGTAGCTCTTCATCACCACC	0	0	p53 CDE Neutral		AP2M1	GGTAGCTCTTCATCACCACC	0	0	p53 CDE Neutral		AP2M1	GGTAGCTCTTCATCACCACC	0	0	p53 CDE Neutral		AP2M1	GGTAGCTCTTCATCACCACC	0	0	p53 CDE Neutral		AP2M1	GGTAGCTCTTCATCACCACC	0	0	p53 CDE Neutral		AP2M1	GGTAGCTCTTCATCACCACC	0	0	p53 CDE Neutral		AP2M1	GGTAGCTCTTCATCACCACC	0	0	p53 CDE Neutral
AP2M1	GTTATTGAAAAGCAGGGCAA	34	174.287	p53 CDE Neutral		AP2M1	GTTATTGAAAAGCAGGGCAA	51	195.61	p53 CDE Neutral		AP2M1	GTTATTGAAAAGCAGGGCAA	89	248.456	p53 CDE Neutral		AP2M1	GTTATTGAAAAGCAGGGCAA	28	112.153	p53 CDE Neutral		AP2M1	GTTATTGAAAAGCAGGGCAA	71	192.482	p53 CDE Neutral		AP2M1	GTTATTGAAAAGCAGGGCAA	50	290.335	p53 CDE Neutral		AP2M1	GTTATTGAAAAGCAGGGCAA	2	7.31695	p53 CDE Neutral		AP2M1	GTTATTGAAAAGCAGGGCAA	11	34.5502	p53 CDE Neutral
AP2M1	TTATTCATCTATAATCACAA	96	492.106	p53 CDE Neutral		AP2M1	TTATTCATCTATAATCACAA	157	602.172	p53 CDE Neutral		AP2M1	TTATTCATCTATAATCACAA	83	231.706	p53 CDE Neutral		AP2M1	TTATTCATCTATAATCACAA	94	376.515	p53 CDE Neutral		AP2M1	TTATTCATCTATAATCACAA	208	563.892	p53 CDE Neutral		AP2M1	TTATTCATCTATAATCACAA	76	441.309	p53 CDE Neutral		AP2M1	TTATTCATCTATAATCACAA	21	76.828	p53 CDE Neutral		AP2M1	TTATTCATCTATAATCACAA	23	72.2414	p53 CDE Neutral
APRT	AGCTGCAGCTGGTTGAGCAG	68	348.575	p53 CDE Pos		APRT	AGCTGCAGCTGGTTGAGCAG	122	467.93	p53 CDE Pos		APRT	AGCTGCAGCTGGTTGAGCAG	97	270.789	p53 CDE Pos		APRT	AGCTGCAGCTGGTTGAGCAG	9	36.0493	p53 CDE Pos		APRT	AGCTGCAGCTGGTTGAGCAG	155	420.208	p53 CDE Pos		APRT	AGCTGCAGCTGGTTGAGCAG	55	319.368	p53 CDE Pos		APRT	AGCTGCAGCTGGTTGAGCAG	6	21.9508	p53 CDE Pos		APRT	AGCTGCAGCTGGTTGAGCAG	21	65.9595	p53 CDE Pos
APRT	AGGACAGAGGGTGGTCGTCG	59	302.44	p53 CDE Pos		APRT	AGGACAGAGGGTGGTCGTCG	87	333.687	p53 CDE Pos		APRT	AGGACAGAGGGTGGTCGTCG	112	312.664	p53 CDE Pos		APRT	AGGACAGAGGGTGGTCGTCG	20	80.1096	p53 CDE Pos		APRT	AGGACAGAGGGTGGTCGTCG	77	208.748	p53 CDE Pos		APRT	AGGACAGAGGGTGGTCGTCG	51	296.141	p53 CDE Pos		APRT	AGGACAGAGGGTGGTCGTCG	33	120.73	p53 CDE Pos		APRT	AGGACAGAGGGTGGTCGTCG	6	18.8456	p53 CDE Pos
APRT	CACCTGAAGGCGACCCACGG	64	328.071	p53 CDE Pos		APRT	CACCTGAAGGCGACCCACGG	97	372.042	p53 CDE Pos		APRT	CACCTGAAGGCGACCCACGG	74	206.582	p53 CDE Pos		APRT	CACCTGAAGGCGACCCACGG	46	184.252	p53 CDE Pos		APRT	CACCTGAAGGCGACCCACGG	132	357.854	p53 CDE Pos		APRT	CACCTGAAGGCGACCCACGG	70	406.469	p53 CDE Pos		APRT	CACCTGAAGGCGACCCACGG	8	29.2678	p53 CDE Pos		APRT	CACCTGAAGGCGACCCACGG	6	18.8456	p53 CDE Pos
APRT	CCAGGAGGCCGATGGCGGCG	20	102.522	p53 CDE Pos		APRT	CCAGGAGGCCGATGGCGGCG	32	122.736	p53 CDE Pos		APRT	CCAGGAGGCCGATGGCGGCG	27	75.3744	p53 CDE Pos		APRT	CCAGGAGGCCGATGGCGGCG	1	4.00548	p53 CDE Pos		APRT	CCAGGAGGCCGATGGCGGCG	47	127.418	p53 CDE Pos		APRT	CCAGGAGGCCGATGGCGGCG	31	180.008	p53 CDE Pos		APRT	CCAGGAGGCCGATGGCGGCG	0	0	p53 CDE Pos		APRT	CCAGGAGGCCGATGGCGGCG	2	6.28186	p53 CDE Pos
APRT	CCTTCAGGTGTCGCGCCAGG	0	0	p53 CDE Pos		APRT	CCTTCAGGTGTCGCGCCAGG	0	0	p53 CDE Pos		APRT	CCTTCAGGTGTCGCGCCAGG	0	0	p53 CDE Pos		APRT	CCTTCAGGTGTCGCGCCAGG	0	0	p53 CDE Pos		APRT	CCTTCAGGTGTCGCGCCAGG	0	0	p53 CDE Pos		APRT	CCTTCAGGTGTCGCGCCAGG	0	0	p53 CDE Pos		APRT	CCTTCAGGTGTCGCGCCAGG	0	0	p53 CDE Pos		APRT	CCTTCAGGTGTCGCGCCAGG	0	0	p53 CDE Pos
APRT	CCTTCAGGTGTCGCGCCAGG	0	0	p53 CDE Pos		APRT	CCTTCAGGTGTCGCGCCAGG	0	0	p53 CDE Pos		APRT	CCTTCAGGTGTCGCGCCAGG	0	0	p53 CDE Pos		APRT	CCTTCAGGTGTCGCGCCAGG	0	0	p53 CDE Pos		APRT	CCTTCAGGTGTCGCGCCAGG	0	0	p53 CDE Pos		APRT	CCTTCAGGTGTCGCGCCAGG	0	0	p53 CDE Pos		APRT	CCTTCAGGTGTCGCGCCAGG	0	0	p53 CDE Pos		APRT	CCTTCAGGTGTCGCGCCAGG	0	0	p53 CDE Pos
APRT	CTGACAGGCCTAGACTCCCG	63	322.944	p53 CDE Pos		APRT	CTGACAGGCCTAGACTCCCG	67	256.978	p53 CDE Pos		APRT	CTGACAGGCCTAGACTCCCG	27	75.3744	p53 CDE Pos		APRT	CTGACAGGCCTAGACTCCCG	15	60.0822	p53 CDE Pos		APRT	CTGACAGGCCTAGACTCCCG	33	89.4636	p53 CDE Pos		APRT	CTGACAGGCCTAGACTCCCG	28	162.587	p53 CDE Pos		APRT	CTGACAGGCCTAGACTCCCG	0	0	p53 CDE Pos		APRT	CTGACAGGCCTAGACTCCCG	4	12.5637	p53 CDE Pos
APRT	GCGTGCTCATCCGAAAGCGG	26	133.279	p53 CDE Pos		APRT	GCGTGCTCATCCGAAAGCGG	44	168.761	p53 CDE Pos		APRT	GCGTGCTCATCCGAAAGCGG	26	72.5827	p53 CDE Pos		APRT	GCGTGCTCATCCGAAAGCGG	23	92.126	p53 CDE Pos		APRT	GCGTGCTCATCCGAAAGCGG	49	132.84	p53 CDE Pos		APRT	GCGTGCTCATCCGAAAGCGG	25	145.167	p53 CDE Pos		APRT	GCGTGCTCATCCGAAAGCGG	0	0	p53 CDE Pos		APRT	GCGTGCTCATCCGAAAGCGG	0	0	p53 CDE Pos
APRT	GCTGCGTGCTCATCCGAAAG	67	343.449	p53 CDE Pos		APRT	GCTGCGTGCTCATCCGAAAG	125	479.436	p53 CDE Pos		APRT	GCTGCGTGCTCATCCGAAAG	61	170.29	p53 CDE Pos		APRT	GCTGCGTGCTCATCCGAAAG	66	264.362	p53 CDE Pos		APRT	GCTGCGTGCTCATCCGAAAG	137	371.41	p53 CDE Pos		APRT	GCTGCGTGCTCATCCGAAAG	60	348.402	p53 CDE Pos		APRT	GCTGCGTGCTCATCCGAAAG	9	32.9263	p53 CDE Pos		APRT	GCTGCGTGCTCATCCGAAAG	10	31.4093	p53 CDE Pos
APRT	GGAATAGGAGGCCCACAGAG	14	71.7654	p53 CDE Pos		APRT	GGAATAGGAGGCCCACAGAG	34	130.407	p53 CDE Pos		APRT	GGAATAGGAGGCCCACAGAG	10	27.9164	p53 CDE Pos		APRT	GGAATAGGAGGCCCACAGAG	6	24.0329	p53 CDE Pos		APRT	GGAATAGGAGGCCCACAGAG	58	157.239	p53 CDE Pos		APRT	GGAATAGGAGGCCCACAGAG	35	203.234	p53 CDE Pos		APRT	GGAATAGGAGGCCCACAGAG	10	36.5847	p53 CDE Pos		APRT	GGAATAGGAGGCCCACAGAG	12	37.6912	p53 CDE Pos
AQP12B	ATGGAAACAAAAGGCGCAGG	60	307.566	p53 CDE Pos		AQP12B	ATGGAAACAAAAGGCGCAGG	74	283.826	p53 CDE Pos		AQP12B	ATGGAAACAAAAGGCGCAGG	104	290.331	p53 CDE Pos		AQP12B	ATGGAAACAAAAGGCGCAGG	72	288.395	p53 CDE Pos		AQP12B	ATGGAAACAAAAGGCGCAGG	133	360.566	p53 CDE Pos		AQP12B	ATGGAAACAAAAGGCGCAGG	53	307.755	p53 CDE Pos		AQP12B	ATGGAAACAAAAGGCGCAGG	4	14.6339	p53 CDE Pos		AQP12B	ATGGAAACAAAAGGCGCAGG	2	6.28186	p53 CDE Pos
AQP12B	CATTGGGAAGTGGTGACACA	24	123.026	p53 CDE Pos		AQP12B	CATTGGGAAGTGGTGACACA	70	268.484	p53 CDE Pos		AQP12B	CATTGGGAAGTGGTGACACA	17	47.4579	p53 CDE Pos		AQP12B	CATTGGGAAGTGGTGACACA	9	36.0493	p53 CDE Pos		AQP12B	CATTGGGAAGTGGTGACACA	56	151.817	p53 CDE Pos		AQP12B	CATTGGGAAGTGGTGACACA	23	133.554	p53 CDE Pos		AQP12B	CATTGGGAAGTGGTGACACA	2	7.31695	p53 CDE Pos		AQP12B	CATTGGGAAGTGGTGACACA	0	0	p53 CDE Pos
AQP12B	CCCTCTGTGAGGCAGCCAGG	60	307.566	p53 CDE Pos		AQP12B	CCCTCTGTGAGGCAGCCAGG	78	299.168	p53 CDE Pos		AQP12B	CCCTCTGTGAGGCAGCCAGG	53	147.957	p53 CDE Pos		AQP12B	CCCTCTGTGAGGCAGCCAGG	45	180.247	p53 CDE Pos		AQP12B	CCCTCTGTGAGGCAGCCAGG	112	303.634	p53 CDE Pos		AQP12B	CCCTCTGTGAGGCAGCCAGG	48	278.721	p53 CDE Pos		AQP12B	CCCTCTGTGAGGCAGCCAGG	44	160.973	p53 CDE Pos		AQP12B	CCCTCTGTGAGGCAGCCAGG	36	113.073	p53 CDE Pos
AQP12B	CCTGGAGGTACTGTTCGCAT	21	107.648	p53 CDE Pos		AQP12B	CCTGGAGGTACTGTTCGCAT	36	138.078	p53 CDE Pos		AQP12B	CCTGGAGGTACTGTTCGCAT	54	150.749	p53 CDE Pos		AQP12B	CCTGGAGGTACTGTTCGCAT	30	120.164	p53 CDE Pos		AQP12B	CCTGGAGGTACTGTTCGCAT	59	159.95	p53 CDE Pos		AQP12B	CCTGGAGGTACTGTTCGCAT	44	255.495	p53 CDE Pos		AQP12B	CCTGGAGGTACTGTTCGCAT	24	87.8034	p53 CDE Pos		AQP12B	CCTGGAGGTACTGTTCGCAT	17	53.3958	p53 CDE Pos
AQP12B	CCTTGTGAAAGCCATCACCG	0	0	p53 CDE Pos		AQP12B	CCTTGTGAAAGCCATCACCG	0	0	p53 CDE Pos		AQP12B	CCTTGTGAAAGCCATCACCG	0	0	p53 CDE Pos		AQP12B	CCTTGTGAAAGCCATCACCG	0	0	p53 CDE Pos		AQP12B	CCTTGTGAAAGCCATCACCG	0	0	p53 CDE Pos		AQP12B	CCTTGTGAAAGCCATCACCG	0	0	p53 CDE Pos		AQP12B	CCTTGTGAAAGCCATCACCG	0	0	p53 CDE Pos		AQP12B	CCTTGTGAAAGCCATCACCG	0	0	p53 CDE Pos
AQP12B	CGAGCAGGCAAAGGTCACAG	34	174.287	p53 CDE Pos		AQP12B	CGAGCAGGCAAAGGTCACAG	30	115.065	p53 CDE Pos		AQP12B	CGAGCAGGCAAAGGTCACAG	44	122.832	p53 CDE Pos		AQP12B	CGAGCAGGCAAAGGTCACAG	9	36.0493	p53 CDE Pos		AQP12B	CGAGCAGGCAAAGGTCACAG	73	197.904	p53 CDE Pos		AQP12B	CGAGCAGGCAAAGGTCACAG	16	92.9071	p53 CDE Pos		AQP12B	CGAGCAGGCAAAGGTCACAG	14	51.2186	p53 CDE Pos		AQP12B	CGAGCAGGCAAAGGTCACAG	16	50.2549	p53 CDE Pos
AQP12B	GAGGAACTCCTGCAGGGACA	26	133.279	p53 CDE Pos		AQP12B	GAGGAACTCCTGCAGGGACA	67	256.978	p53 CDE Pos		AQP12B	GAGGAACTCCTGCAGGGACA	116	323.831	p53 CDE Pos		AQP12B	GAGGAACTCCTGCAGGGACA	59	236.323	p53 CDE Pos		AQP12B	GAGGAACTCCTGCAGGGACA	110	298.212	p53 CDE Pos		AQP12B	GAGGAACTCCTGCAGGGACA	62	360.015	p53 CDE Pos		AQP12B	GAGGAACTCCTGCAGGGACA	312	1141.44	p53 CDE Pos		AQP12B	GAGGAACTCCTGCAGGGACA	225	706.709	p53 CDE Pos
AQP12B	GCAGGCAAAGGTCACAGAGG	38	194.792	p53 CDE Pos		AQP12B	GCAGGCAAAGGTCACAGAGG	65	249.307	p53 CDE Pos		AQP12B	GCAGGCAAAGGTCACAGAGG	126	351.747	p53 CDE Pos		AQP12B	GCAGGCAAAGGTCACAGAGG	51	204.279	p53 CDE Pos		AQP12B	GCAGGCAAAGGTCACAGAGG	88	238.57	p53 CDE Pos		AQP12B	GCAGGCAAAGGTCACAGAGG	49	284.528	p53 CDE Pos		AQP12B	GCAGGCAAAGGTCACAGAGG	505	1847.53	p53 CDE Pos		AQP12B	GCAGGCAAAGGTCACAGAGG	168	527.676	p53 CDE Pos
AQP12B	GGTGTGTCCCGAGCAGGCAA	44	225.548	p53 CDE Pos		AQP12B	GGTGTGTCCCGAGCAGGCAA	55	210.952	p53 CDE Pos		AQP12B	GGTGTGTCCCGAGCAGGCAA	34	94.9159	p53 CDE Pos		AQP12B	GGTGTGTCCCGAGCAGGCAA	45	180.247	p53 CDE Pos		AQP12B	GGTGTGTCCCGAGCAGGCAA	81	219.593	p53 CDE Pos		AQP12B	GGTGTGTCCCGAGCAGGCAA	50	290.335	p53 CDE Pos		AQP12B	GGTGTGTCCCGAGCAGGCAA	62	226.825	p53 CDE Pos		AQP12B	GGTGTGTCCCGAGCAGGCAA	37	116.214	p53 CDE Pos
AQP12B	TTATTGTTGTTCCACCCAGC	46	235.801	p53 CDE Pos		AQP12B	TTATTGTTGTTCCACCCAGC	40	153.42	p53 CDE Pos		AQP12B	TTATTGTTGTTCCACCCAGC	18	50.2496	p53 CDE Pos		AQP12B	TTATTGTTGTTCCACCCAGC	10	40.0548	p53 CDE Pos		AQP12B	TTATTGTTGTTCCACCCAGC	64	173.505	p53 CDE Pos		AQP12B	TTATTGTTGTTCCACCCAGC	29	168.394	p53 CDE Pos		AQP12B	TTATTGTTGTTCCACCCAGC	40	146.339	p53 CDE Pos		AQP12B	TTATTGTTGTTCCACCCAGC	9	28.2684	p53 CDE Pos
AREG	AGAAGGCATTTCACTCACAG	43	220.422	p53 CDE Neg		AREG	AGAAGGCATTTCACTCACAG	56	214.787	p53 CDE Neg		AREG	AGAAGGCATTTCACTCACAG	155	432.705	p53 CDE Neg		AREG	AGAAGGCATTTCACTCACAG	93	372.51	p53 CDE Neg		AREG	AGAAGGCATTTCACTCACAG	101	273.813	p53 CDE Neg		AREG	AGAAGGCATTTCACTCACAG	36	209.041	p53 CDE Neg		AREG	AGAAGGCATTTCACTCACAG	13	47.5602	p53 CDE Neg		AREG	AGAAGGCATTTCACTCACAG	21	65.9595	p53 CDE Neg
AREG	ATGCAAATATATAGAGCACC	82	420.34	p53 CDE Neg		AREG	ATGCAAATATATAGAGCACC	90	345.194	p53 CDE Neg		AREG	ATGCAAATATATAGAGCACC	342	954.742	p53 CDE Neg		AREG	ATGCAAATATATAGAGCACC	131	524.718	p53 CDE Neg		AREG	ATGCAAATATATAGAGCACC	100	271.102	p53 CDE Neg		AREG	ATGCAAATATATAGAGCACC	77	447.116	p53 CDE Neg		AREG	ATGCAAATATATAGAGCACC	8	29.2678	p53 CDE Neg		AREG	ATGCAAATATATAGAGCACC	4	12.5637	p53 CDE Neg
AREG	CCTCAAATCCATCAGCACTG	33	169.161	p53 CDE Neg		AREG	CCTCAAATCCATCAGCACTG	59	226.294	p53 CDE Neg		AREG	CCTCAAATCCATCAGCACTG	98	273.581	p53 CDE Neg		AREG	CCTCAAATCCATCAGCACTG	41	164.225	p53 CDE Neg		AREG	CCTCAAATCCATCAGCACTG	99	268.391	p53 CDE Neg		AREG	CCTCAAATCCATCAGCACTG	57	330.982	p53 CDE Neg		AREG	CCTCAAATCCATCAGCACTG	79	289.019	p53 CDE Neg		AREG	CCTCAAATCCATCAGCACTG	44	138.201	p53 CDE Neg
AREG	GAATATTTCGGTGAACGGTG	15	76.8915	p53 CDE Neg		AREG	GAATATTTCGGTGAACGGTG	8	30.6839	p53 CDE Neg		AREG	GAATATTTCGGTGAACGGTG	16	44.6663	p53 CDE Neg		AREG	GAATATTTCGGTGAACGGTG	9	36.0493	p53 CDE Neg		AREG	GAATATTTCGGTGAACGGTG	21	56.9314	p53 CDE Neg		AREG	GAATATTTCGGTGAACGGTG	19	110.327	p53 CDE Neg		AREG	GAATATTTCGGTGAACGGTG	0	0	p53 CDE Neg		AREG	GAATATTTCGGTGAACGGTG	0	0	p53 CDE Neg
AREG	GGTCCAATCCAGCAGCATAA	27	138.405	p53 CDE Neg		AREG	GGTCCAATCCAGCAGCATAA	29	111.229	p53 CDE Neg		AREG	GGTCCAATCCAGCAGCATAA	45	125.624	p53 CDE Neg		AREG	GGTCCAATCCAGCAGCATAA	40	160.219	p53 CDE Neg		AREG	GGTCCAATCCAGCAGCATAA	53	143.684	p53 CDE Neg		AREG	GGTCCAATCCAGCAGCATAA	8	46.4536	p53 CDE Neg		AREG	GGTCCAATCCAGCAGCATAA	40	146.339	p53 CDE Neg		AREG	GGTCCAATCCAGCAGCATAA	8	25.1274	p53 CDE Neg
AREG	GTAGTCATAGTCGGCTCCCG	0	0	p53 CDE Neg		AREG	GTAGTCATAGTCGGCTCCCG	0	0	p53 CDE Neg		AREG	GTAGTCATAGTCGGCTCCCG	0	0	p53 CDE Neg		AREG	GTAGTCATAGTCGGCTCCCG	0	0	p53 CDE Neg		AREG	GTAGTCATAGTCGGCTCCCG	0	0	p53 CDE Neg		AREG	GTAGTCATAGTCGGCTCCCG	0	0	p53 CDE Neg		AREG	GTAGTCATAGTCGGCTCCCG	0	0	p53 CDE Neg		AREG	GTAGTCATAGTCGGCTCCCG	0	0	p53 CDE Neg
AREG	GTAGTCATAGTCGGCTCCCG	0	0	p53 CDE Neg		AREG	GTAGTCATAGTCGGCTCCCG	0	0	p53 CDE Neg		AREG	GTAGTCATAGTCGGCTCCCG	0	0	p53 CDE Neg		AREG	GTAGTCATAGTCGGCTCCCG	0	0	p53 CDE Neg		AREG	GTAGTCATAGTCGGCTCCCG	0	0	p53 CDE Neg		AREG	GTAGTCATAGTCGGCTCCCG	0	0	p53 CDE Neg		AREG	GTAGTCATAGTCGGCTCCCG	0	0	p53 CDE Neg		AREG	GTAGTCATAGTCGGCTCCCG	0	0	p53 CDE Neg
AREG	TAAGCCCCCCCAAAACAAGA	25	128.153	p53 CDE Neg		AREG	TAAGCCCCCCCAAAACAAGA	23	88.2162	p53 CDE Neg		AREG	TAAGCCCCCCCAAAACAAGA	74	206.582	p53 CDE Neg		AREG	TAAGCCCCCCCAAAACAAGA	41	164.225	p53 CDE Neg		AREG	TAAGCCCCCCCAAAACAAGA	36	97.5967	p53 CDE Neg		AREG	TAAGCCCCCCCAAAACAAGA	12	69.6803	p53 CDE Neg		AREG	TAAGCCCCCCCAAAACAAGA	3	10.9754	p53 CDE Neg		AREG	TAAGCCCCCCCAAAACAAGA	63	197.879	p53 CDE Neg
AREG	TTTCAAAATTTCTGCATTCA	28	143.531	p53 CDE Neg		AREG	TTTCAAAATTTCTGCATTCA	63	241.636	p53 CDE Neg		AREG	TTTCAAAATTTCTGCATTCA	126	351.747	p53 CDE Neg		AREG	TTTCAAAATTTCTGCATTCA	38	152.208	p53 CDE Neg		AREG	TTTCAAAATTTCTGCATTCA	69	187.06	p53 CDE Neg		AREG	TTTCAAAATTTCTGCATTCA	27	156.781	p53 CDE Neg		AREG	TTTCAAAATTTCTGCATTCA	15	54.8771	p53 CDE Neg		AREG	TTTCAAAATTTCTGCATTCA	15	47.114	p53 CDE Neg
AREG	TTTTGAAATTCTGCATTACA	0	0	p53 CDE Neg		AREG	TTTTGAAATTCTGCATTACA	0	0	p53 CDE Neg		AREG	TTTTGAAATTCTGCATTACA	0	0	p53 CDE Neg		AREG	TTTTGAAATTCTGCATTACA	0	0	p53 CDE Neg		AREG	TTTTGAAATTCTGCATTACA	0	0	p53 CDE Neg		AREG	TTTTGAAATTCTGCATTACA	0	0	p53 CDE Neg		AREG	TTTTGAAATTCTGCATTACA	0	0	p53 CDE Neg		AREG	TTTTGAAATTCTGCATTACA	0	0	p53 CDE Neg
ARHGEF28	ACAGTCTCCCTCCTTCCAGT	33	169.161	p53 CDE Neutral		ARHGEF28	ACAGTCTCCCTCCTTCCAGT	68	260.813	p53 CDE Neutral		ARHGEF28	ACAGTCTCCCTCCTTCCAGT	88	245.665	p53 CDE Neutral		ARHGEF28	ACAGTCTCCCTCCTTCCAGT	63	252.345	p53 CDE Neutral		ARHGEF28	ACAGTCTCCCTCCTTCCAGT	123	333.455	p53 CDE Neutral		ARHGEF28	ACAGTCTCCCTCCTTCCAGT	43	249.688	p53 CDE Neutral		ARHGEF28	ACAGTCTCCCTCCTTCCAGT	7	25.6093	p53 CDE Neutral		ARHGEF28	ACAGTCTCCCTCCTTCCAGT	0	0	p53 CDE Neutral
ARHGEF28	ACATCAAGTAGACCTCAAGG	30	153.783	p53 CDE Neutral		ARHGEF28	ACATCAAGTAGACCTCAAGG	69	264.649	p53 CDE Neutral		ARHGEF28	ACATCAAGTAGACCTCAAGG	44	122.832	p53 CDE Neutral		ARHGEF28	ACATCAAGTAGACCTCAAGG	5	20.0274	p53 CDE Neutral		ARHGEF28	ACATCAAGTAGACCTCAAGG	54	146.395	p53 CDE Neutral		ARHGEF28	ACATCAAGTAGACCTCAAGG	34	197.428	p53 CDE Neutral		ARHGEF28	ACATCAAGTAGACCTCAAGG	23	84.1449	p53 CDE Neutral		ARHGEF28	ACATCAAGTAGACCTCAAGG	3	9.42279	p53 CDE Neutral
ARHGEF28	ACTCACGGCGCCCATCTGTG	67	343.449	p53 CDE Neutral		ARHGEF28	ACTCACGGCGCCCATCTGTG	106	406.562	p53 CDE Neutral		ARHGEF28	ACTCACGGCGCCCATCTGTG	157	438.288	p53 CDE Neutral		ARHGEF28	ACTCACGGCGCCCATCTGTG	118	472.647	p53 CDE Neutral		ARHGEF28	ACTCACGGCGCCCATCTGTG	87	235.859	p53 CDE Neutral		ARHGEF28	ACTCACGGCGCCCATCTGTG	56	325.175	p53 CDE Neutral		ARHGEF28	ACTCACGGCGCCCATCTGTG	335	1225.59	p53 CDE Neutral		ARHGEF28	ACTCACGGCGCCCATCTGTG	245	769.528	p53 CDE Neutral
ARHGEF28	CGAATGTCAGTCACAAACTG	6	30.7566	p53 CDE Neutral		ARHGEF28	CGAATGTCAGTCACAAACTG	8	30.6839	p53 CDE Neutral		ARHGEF28	CGAATGTCAGTCACAAACTG	4	11.1666	p53 CDE Neutral		ARHGEF28	CGAATGTCAGTCACAAACTG	5	20.0274	p53 CDE Neutral		ARHGEF28	CGAATGTCAGTCACAAACTG	30	81.3306	p53 CDE Neutral		ARHGEF28	CGAATGTCAGTCACAAACTG	13	75.487	p53 CDE Neutral		ARHGEF28	CGAATGTCAGTCACAAACTG	4	14.6339	p53 CDE Neutral		ARHGEF28	CGAATGTCAGTCACAAACTG	0	0	p53 CDE Neutral
ARHGEF28	GATGAGCTGCTACAGTCCAT	39	199.918	p53 CDE Neutral		ARHGEF28	GATGAGCTGCTACAGTCCAT	34	130.407	p53 CDE Neutral		ARHGEF28	GATGAGCTGCTACAGTCCAT	31	86.5409	p53 CDE Neutral		ARHGEF28	GATGAGCTGCTACAGTCCAT	37	148.203	p53 CDE Neutral		ARHGEF28	GATGAGCTGCTACAGTCCAT	53	143.684	p53 CDE Neutral		ARHGEF28	GATGAGCTGCTACAGTCCAT	41	238.074	p53 CDE Neutral		ARHGEF28	GATGAGCTGCTACAGTCCAT	0	0	p53 CDE Neutral		ARHGEF28	GATGAGCTGCTACAGTCCAT	37	116.214	p53 CDE Neutral
ARHGEF28	GCAGCTGGACCACAGCACCG	16	82.0176	p53 CDE Neutral		ARHGEF28	GCAGCTGGACCACAGCACCG	32	122.736	p53 CDE Neutral		ARHGEF28	GCAGCTGGACCACAGCACCG	72	200.998	p53 CDE Neutral		ARHGEF28	GCAGCTGGACCACAGCACCG	14	56.0767	p53 CDE Neutral		ARHGEF28	GCAGCTGGACCACAGCACCG	67	181.638	p53 CDE Neutral		ARHGEF28	GCAGCTGGACCACAGCACCG	30	174.201	p53 CDE Neutral		ARHGEF28	GCAGCTGGACCACAGCACCG	69	252.435	p53 CDE Neutral		ARHGEF28	GCAGCTGGACCACAGCACCG	33	103.651	p53 CDE Neutral
ARHGEF28	GCTGTCCTGAATGGTCAAGG	21	107.648	p53 CDE Neutral		ARHGEF28	GCTGTCCTGAATGGTCAAGG	38	145.749	p53 CDE Neutral		ARHGEF28	GCTGTCCTGAATGGTCAAGG	126	351.747	p53 CDE Neutral		ARHGEF28	GCTGTCCTGAATGGTCAAGG	72	288.395	p53 CDE Neutral		ARHGEF28	GCTGTCCTGAATGGTCAAGG	92	249.414	p53 CDE Neutral		ARHGEF28	GCTGTCCTGAATGGTCAAGG	40	232.268	p53 CDE Neutral		ARHGEF28	GCTGTCCTGAATGGTCAAGG	107	391.457	p53 CDE Neutral		ARHGEF28	GCTGTCCTGAATGGTCAAGG	174	546.522	p53 CDE Neutral
ARHGEF28	GGACCAGAAGTCTCGCGACG	39	199.918	p53 CDE Neutral		ARHGEF28	GGACCAGAAGTCTCGCGACG	53	203.281	p53 CDE Neutral		ARHGEF28	GGACCAGAAGTCTCGCGACG	55	153.54	p53 CDE Neutral		ARHGEF28	GGACCAGAAGTCTCGCGACG	27	108.148	p53 CDE Neutral		ARHGEF28	GGACCAGAAGTCTCGCGACG	51	138.262	p53 CDE Neutral		ARHGEF28	GGACCAGAAGTCTCGCGACG	21	121.941	p53 CDE Neutral		ARHGEF28	GGACCAGAAGTCTCGCGACG	12	43.9017	p53 CDE Neutral		ARHGEF28	GGACCAGAAGTCTCGCGACG	7	21.9865	p53 CDE Neutral
ARHGEF28	TATCTGATGGCCGGAACCAG	29	148.657	p53 CDE Neutral		ARHGEF28	TATCTGATGGCCGGAACCAG	107	410.397	p53 CDE Neutral		ARHGEF28	TATCTGATGGCCGGAACCAG	106	295.914	p53 CDE Neutral		ARHGEF28	TATCTGATGGCCGGAACCAG	63	252.345	p53 CDE Neutral		ARHGEF28	TATCTGATGGCCGGAACCAG	112	303.634	p53 CDE Neutral		ARHGEF28	TATCTGATGGCCGGAACCAG	68	394.855	p53 CDE Neutral		ARHGEF28	TATCTGATGGCCGGAACCAG	4	14.6339	p53 CDE Neutral		ARHGEF28	TATCTGATGGCCGGAACCAG	10	31.4093	p53 CDE Neutral
ARHGEF28	TCTACAGTATGAAGGAACGA	44	225.548	p53 CDE Neutral		ARHGEF28	TCTACAGTATGAAGGAACGA	40	153.42	p53 CDE Neutral		ARHGEF28	TCTACAGTATGAAGGAACGA	29	80.9576	p53 CDE Neutral		ARHGEF28	TCTACAGTATGAAGGAACGA	50	200.274	p53 CDE Neutral		ARHGEF28	TCTACAGTATGAAGGAACGA	61	165.372	p53 CDE Neutral		ARHGEF28	TCTACAGTATGAAGGAACGA	32	185.814	p53 CDE Neutral		ARHGEF28	TCTACAGTATGAAGGAACGA	54	197.558	p53 CDE Neutral		ARHGEF28	TCTACAGTATGAAGGAACGA	83	260.697	p53 CDE Neutral
ASPHD1	CGACTCTTTTCTACACACAG	0	0	p53 CDE Pos		ASPHD1	CGACTCTTTTCTACACACAG	0	0	p53 CDE Pos		ASPHD1	CGACTCTTTTCTACACACAG	0	0	p53 CDE Pos		ASPHD1	CGACTCTTTTCTACACACAG	0	0	p53 CDE Pos		ASPHD1	CGACTCTTTTCTACACACAG	0	0	p53 CDE Pos		ASPHD1	CGACTCTTTTCTACACACAG	0	0	p53 CDE Pos		ASPHD1	CGACTCTTTTCTACACACAG	0	0	p53 CDE Pos		ASPHD1	CGACTCTTTTCTACACACAG	0	0	p53 CDE Pos
ASPHD1	GCATGTCTTGGGAGCCCAGG	91	466.475	p53 CDE Pos		ASPHD1	GCATGTCTTGGGAGCCCAGG	55	210.952	p53 CDE Pos		ASPHD1	GCATGTCTTGGGAGCCCAGG	5	13.9582	p53 CDE Pos		ASPHD1	GCATGTCTTGGGAGCCCAGG	9	36.0493	p53 CDE Pos		ASPHD1	GCATGTCTTGGGAGCCCAGG	76	206.037	p53 CDE Pos		ASPHD1	GCATGTCTTGGGAGCCCAGG	55	319.368	p53 CDE Pos		ASPHD1	GCATGTCTTGGGAGCCCAGG	7	25.6093	p53 CDE Pos		ASPHD1	GCATGTCTTGGGAGCCCAGG	14	43.973	p53 CDE Pos
ASPHD1	GCCTCGAGTGGTCTTCATCG	192	984.212	p53 CDE Pos		ASPHD1	GCCTCGAGTGGTCTTCATCG	230	882.162	p53 CDE Pos		ASPHD1	GCCTCGAGTGGTCTTCATCG	374	1044.07	p53 CDE Pos		ASPHD1	GCCTCGAGTGGTCTTCATCG	335	1341.84	p53 CDE Pos		ASPHD1	GCCTCGAGTGGTCTTCATCG	324	878.37	p53 CDE Pos		ASPHD1	GCCTCGAGTGGTCTTCATCG	164	952.298	p53 CDE Pos		ASPHD1	GCCTCGAGTGGTCTTCATCG	384	1404.85	p53 CDE Pos		ASPHD1	GCCTCGAGTGGTCTTCATCG	572	1796.61	p53 CDE Pos
ASPHD1	GCTGTCTCTCTCTCCTTCCG	71	363.953	p53 CDE Pos		ASPHD1	GCTGTCTCTCTCTCCTTCCG	82	314.51	p53 CDE Pos		ASPHD1	GCTGTCTCTCTCTCCTTCCG	142	396.413	p53 CDE Pos		ASPHD1	GCTGTCTCTCTCTCCTTCCG	55	220.301	p53 CDE Pos		ASPHD1	GCTGTCTCTCTCTCCTTCCG	129	349.721	p53 CDE Pos		ASPHD1	GCTGTCTCTCTCTCCTTCCG	43	249.688	p53 CDE Pos		ASPHD1	GCTGTCTCTCTCTCCTTCCG	309	1130.47	p53 CDE Pos		ASPHD1	GCTGTCTCTCTCTCCTTCCG	435	1366.3	p53 CDE Pos
ASPHD1	GGAAGGGAAACAGTCCAGCG	26	133.279	p53 CDE Pos		ASPHD1	GGAAGGGAAACAGTCCAGCG	26	99.7227	p53 CDE Pos		ASPHD1	GGAAGGGAAACAGTCCAGCG	57	159.124	p53 CDE Pos		ASPHD1	GGAAGGGAAACAGTCCAGCG	22	88.1205	p53 CDE Pos		ASPHD1	GGAAGGGAAACAGTCCAGCG	30	81.3306	p53 CDE Pos		ASPHD1	GGAAGGGAAACAGTCCAGCG	17	98.7138	p53 CDE Pos		ASPHD1	GGAAGGGAAACAGTCCAGCG	0	0	p53 CDE Pos		ASPHD1	GGAAGGGAAACAGTCCAGCG	0	0	p53 CDE Pos
ASPHD1	GGACCTCTGGCACCCCAACG	58	297.314	p53 CDE Pos		ASPHD1	GGACCTCTGGCACCCCAACG	57	218.623	p53 CDE Pos		ASPHD1	GGACCTCTGGCACCCCAACG	29	80.9576	p53 CDE Pos		ASPHD1	GGACCTCTGGCACCCCAACG	41	164.225	p53 CDE Pos		ASPHD1	GGACCTCTGGCACCCCAACG	78	211.459	p53 CDE Pos		ASPHD1	GGACCTCTGGCACCCCAACG	37	214.848	p53 CDE Pos		ASPHD1	GGACCTCTGGCACCCCAACG	19	69.511	p53 CDE Pos		ASPHD1	GGACCTCTGGCACCCCAACG	7	21.9865	p53 CDE Pos
ASPHD1	GGCTGAGGGGCACTGTCTAC	51	261.431	p53 CDE Pos		ASPHD1	GGCTGAGGGGCACTGTCTAC	34	130.407	p53 CDE Pos		ASPHD1	GGCTGAGGGGCACTGTCTAC	123	343.372	p53 CDE Pos		ASPHD1	GGCTGAGGGGCACTGTCTAC	38	152.208	p53 CDE Pos		ASPHD1	GGCTGAGGGGCACTGTCTAC	109	295.501	p53 CDE Pos		ASPHD1	GGCTGAGGGGCACTGTCTAC	13	75.487	p53 CDE Pos		ASPHD1	GGCTGAGGGGCACTGTCTAC	23	84.1449	p53 CDE Pos		ASPHD1	GGCTGAGGGGCACTGTCTAC	11	34.5502	p53 CDE Pos
ASPHD1	GTAGCAGTACCAGAGGAACA	74	379.332	p53 CDE Pos		ASPHD1	GTAGCAGTACCAGAGGAACA	88	337.523	p53 CDE Pos		ASPHD1	GTAGCAGTACCAGAGGAACA	143	399.205	p53 CDE Pos		ASPHD1	GTAGCAGTACCAGAGGAACA	98	392.537	p53 CDE Pos		ASPHD1	GTAGCAGTACCAGAGGAACA	93	252.125	p53 CDE Pos		ASPHD1	GTAGCAGTACCAGAGGAACA	61	354.208	p53 CDE Pos		ASPHD1	GTAGCAGTACCAGAGGAACA	40	146.339	p53 CDE Pos		ASPHD1	GTAGCAGTACCAGAGGAACA	34	106.792	p53 CDE Pos
ASPHD1	TCCACGATGAAGACCACTCG	45	230.675	p53 CDE Pos		ASPHD1	TCCACGATGAAGACCACTCG	101	387.384	p53 CDE Pos		ASPHD1	TCCACGATGAAGACCACTCG	134	374.08	p53 CDE Pos		ASPHD1	TCCACGATGAAGACCACTCG	140	560.767	p53 CDE Pos		ASPHD1	TCCACGATGAAGACCACTCG	89	241.281	p53 CDE Pos		ASPHD1	TCCACGATGAAGACCACTCG	53	307.755	p53 CDE Pos		ASPHD1	TCCACGATGAAGACCACTCG	105	384.14	p53 CDE Pos		ASPHD1	TCCACGATGAAGACCACTCG	76	238.711	p53 CDE Pos
ASPHD1	TGAGGGGCACTGTCTACTGG	25	128.153	p53 CDE Pos		ASPHD1	TGAGGGGCACTGTCTACTGG	31	118.9	p53 CDE Pos		ASPHD1	TGAGGGGCACTGTCTACTGG	36	100.499	p53 CDE Pos		ASPHD1	TGAGGGGCACTGTCTACTGG	5	20.0274	p53 CDE Pos		ASPHD1	TGAGGGGCACTGTCTACTGG	24	65.0645	p53 CDE Pos		ASPHD1	TGAGGGGCACTGTCTACTGG	13	75.487	p53 CDE Pos		ASPHD1	TGAGGGGCACTGTCTACTGG	0	0	p53 CDE Pos		ASPHD1	TGAGGGGCACTGTCTACTGG	0	0	p53 CDE Pos
ATE1	AAGCCAGTACTGCTGGTGAA	55	281.936	p53 CDE Neg		ATE1	AAGCCAGTACTGCTGGTGAA	89	341.358	p53 CDE Neg		ATE1	AAGCCAGTACTGCTGGTGAA	89	248.456	p53 CDE Neg		ATE1	AAGCCAGTACTGCTGGTGAA	65	260.356	p53 CDE Neg		ATE1	AAGCCAGTACTGCTGGTGAA	150	406.653	p53 CDE Neg		ATE1	AAGCCAGTACTGCTGGTGAA	47	272.915	p53 CDE Neg		ATE1	AAGCCAGTACTGCTGGTGAA	39	142.68	p53 CDE Neg		ATE1	AAGCCAGTACTGCTGGTGAA	20	62.8186	p53 CDE Neg
ATE1	ATTCCTTTGCAGTTCACCCT	59	302.44	p53 CDE Neg		ATE1	ATTCCTTTGCAGTTCACCCT	43	164.926	p53 CDE Neg		ATE1	ATTCCTTTGCAGTTCACCCT	167	466.204	p53 CDE Neg		ATE1	ATTCCTTTGCAGTTCACCCT	33	132.181	p53 CDE Neg		ATE1	ATTCCTTTGCAGTTCACCCT	79	214.17	p53 CDE Neg		ATE1	ATTCCTTTGCAGTTCACCCT	60	348.402	p53 CDE Neg		ATE1	ATTCCTTTGCAGTTCACCCT	5	18.2924	p53 CDE Neg		ATE1	ATTCCTTTGCAGTTCACCCT	29	91.087	p53 CDE Neg
ATE1	CAGATGATACACAGTTTGGG	31	158.909	p53 CDE Neg		ATE1	CAGATGATACACAGTTTGGG	61	233.965	p53 CDE Neg		ATE1	CAGATGATACACAGTTTGGG	97	270.789	p53 CDE Neg		ATE1	CAGATGATACACAGTTTGGG	84	336.46	p53 CDE Neg		ATE1	CAGATGATACACAGTTTGGG	68	184.349	p53 CDE Neg		ATE1	CAGATGATACACAGTTTGGG	38	220.654	p53 CDE Neg		ATE1	CAGATGATACACAGTTTGGG	0	0	p53 CDE Neg		ATE1	CAGATGATACACAGTTTGGG	0	0	p53 CDE Neg
ATE1	CCAAAAGCCCCCCAGCCACA	57	292.188	p53 CDE Neg		ATE1	CCAAAAGCCCCCCAGCCACA	96	368.207	p53 CDE Neg		ATE1	CCAAAAGCCCCCCAGCCACA	170	474.579	p53 CDE Neg		ATE1	CCAAAAGCCCCCCAGCCACA	53	212.29	p53 CDE Neg		ATE1	CCAAAAGCCCCCCAGCCACA	123	333.455	p53 CDE Neg		ATE1	CCAAAAGCCCCCCAGCCACA	64	371.628	p53 CDE Neg		ATE1	CCAAAAGCCCCCCAGCCACA	58	212.191	p53 CDE Neg		ATE1	CCAAAAGCCCCCCAGCCACA	68	213.583	p53 CDE Neg
ATE1	CCACAATCTGGCCCATTAGG	55	281.936	p53 CDE Neg		ATE1	CCACAATCTGGCCCATTAGG	81	310.675	p53 CDE Neg		ATE1	CCACAATCTGGCCCATTAGG	120	334.997	p53 CDE Neg		ATE1	CCACAATCTGGCCCATTAGG	134	536.734	p53 CDE Neg		ATE1	CCACAATCTGGCCCATTAGG	106	287.368	p53 CDE Neg		ATE1	CCACAATCTGGCCCATTAGG	53	307.755	p53 CDE Neg		ATE1	CCACAATCTGGCCCATTAGG	52	190.241	p53 CDE Neg		ATE1	CCACAATCTGGCCCATTAGG	71	223.006	p53 CDE Neg
ATE1	CCTCCAAGGGTGAACTGCAA	46	235.801	p53 CDE Neg		ATE1	CCTCCAAGGGTGAACTGCAA	60	230.129	p53 CDE Neg		ATE1	CCTCCAAGGGTGAACTGCAA	127	354.539	p53 CDE Neg		ATE1	CCTCCAAGGGTGAACTGCAA	94	376.515	p53 CDE Neg		ATE1	CCTCCAAGGGTGAACTGCAA	80	216.882	p53 CDE Neg		ATE1	CCTCCAAGGGTGAACTGCAA	31	180.008	p53 CDE Neg		ATE1	CCTCCAAGGGTGAACTGCAA	12	43.9017	p53 CDE Neg		ATE1	CCTCCAAGGGTGAACTGCAA	5	15.7047	p53 CDE Neg
ATE1	GCAAGAGCACAGGCTCCCTA	44	225.548	p53 CDE Neg		ATE1	GCAAGAGCACAGGCTCCCTA	44	168.761	p53 CDE Neg		ATE1	GCAAGAGCACAGGCTCCCTA	189	527.621	p53 CDE Neg		ATE1	GCAAGAGCACAGGCTCCCTA	160	640.877	p53 CDE Neg		ATE1	GCAAGAGCACAGGCTCCCTA	86	233.148	p53 CDE Neg		ATE1	GCAAGAGCACAGGCTCCCTA	32	185.814	p53 CDE Neg		ATE1	GCAAGAGCACAGGCTCCCTA	1284	4697.48	p53 CDE Neg		ATE1	GCAAGAGCACAGGCTCCCTA	438	1375.73	p53 CDE Neg
ATE1	GTAGCAGGCCATCCTGCTGG	53	271.683	p53 CDE Neg		ATE1	GTAGCAGGCCATCCTGCTGG	101	387.384	p53 CDE Neg		ATE1	GTAGCAGGCCATCCTGCTGG	118	329.414	p53 CDE Neg		ATE1	GTAGCAGGCCATCCTGCTGG	61	244.334	p53 CDE Neg		ATE1	GTAGCAGGCCATCCTGCTGG	118	319.9	p53 CDE Neg		ATE1	GTAGCAGGCCATCCTGCTGG	79	458.729	p53 CDE Neg		ATE1	GTAGCAGGCCATCCTGCTGG	361	1320.71	p53 CDE Neg		ATE1	GTAGCAGGCCATCCTGCTGG	126	395.757	p53 CDE Neg
ATE1	TCAGGGCACAGCAAATCAGA	52	266.557	p53 CDE Neg		ATE1	TCAGGGCACAGCAAATCAGA	50	191.774	p53 CDE Neg		ATE1	TCAGGGCACAGCAAATCAGA	127	354.539	p53 CDE Neg		ATE1	TCAGGGCACAGCAAATCAGA	73	292.4	p53 CDE Neg		ATE1	TCAGGGCACAGCAAATCAGA	83	225.015	p53 CDE Neg		ATE1	TCAGGGCACAGCAAATCAGA	56	325.175	p53 CDE Neg		ATE1	TCAGGGCACAGCAAATCAGA	32	117.071	p53 CDE Neg		ATE1	TCAGGGCACAGCAAATCAGA	118	370.63	p53 CDE Neg
ATE1	TCTCCAGCTTTCCAGAGACA	4	20.5044	p53 CDE Neg		ATE1	TCTCCAGCTTTCCAGAGACA	0	0	p53 CDE Neg		ATE1	TCTCCAGCTTTCCAGAGACA	0	0	p53 CDE Neg		ATE1	TCTCCAGCTTTCCAGAGACA	0	0	p53 CDE Neg		ATE1	TCTCCAGCTTTCCAGAGACA	2	5.42204	p53 CDE Neg		ATE1	TCTCCAGCTTTCCAGAGACA	0	0	p53 CDE Neg		ATE1	TCTCCAGCTTTCCAGAGACA	0	0	p53 CDE Neg		ATE1	TCTCCAGCTTTCCAGAGACA	0	0	p53 CDE Neg
ATP5I	AACCTCGGGCAGAAGAGGAG	60	307.566	p53 CDE Pos		ATP5I	AACCTCGGGCAGAAGAGGAG	60	230.129	p53 CDE Pos		ATP5I	AACCTCGGGCAGAAGAGGAG	47	131.207	p53 CDE Pos		ATP5I	AACCTCGGGCAGAAGAGGAG	32	128.175	p53 CDE Pos		ATP5I	AACCTCGGGCAGAAGAGGAG	120	325.322	p53 CDE Pos		ATP5I	AACCTCGGGCAGAAGAGGAG	71	412.275	p53 CDE Pos		ATP5I	AACCTCGGGCAGAAGAGGAG	105	384.14	p53 CDE Pos		ATP5I	AACCTCGGGCAGAAGAGGAG	23	72.2414	p53 CDE Pos
ATP5I	AGAAGCAGGATGAACTGAAA	37	189.666	p53 CDE Pos		ATP5I	AGAAGCAGGATGAACTGAAA	23	88.2162	p53 CDE Pos		ATP5I	AGAAGCAGGATGAACTGAAA	34	94.9159	p53 CDE Pos		ATP5I	AGAAGCAGGATGAACTGAAA	24	96.1315	p53 CDE Pos		ATP5I	AGAAGCAGGATGAACTGAAA	26	70.4865	p53 CDE Pos		ATP5I	AGAAGCAGGATGAACTGAAA	29	168.394	p53 CDE Pos		ATP5I	AGAAGCAGGATGAACTGAAA	3	10.9754	p53 CDE Pos		ATP5I	AGAAGCAGGATGAACTGAAA	1	3.14093	p53 CDE Pos
ATP5I	CCTAAAACCTCGGGCAGAAG	17	87.1437	p53 CDE Pos		ATP5I	CCTAAAACCTCGGGCAGAAG	24	92.0517	p53 CDE Pos		ATP5I	CCTAAAACCTCGGGCAGAAG	62	173.082	p53 CDE Pos		ATP5I	CCTAAAACCTCGGGCAGAAG	21	84.1151	p53 CDE Pos		ATP5I	CCTAAAACCTCGGGCAGAAG	32	86.7526	p53 CDE Pos		ATP5I	CCTAAAACCTCGGGCAGAAG	12	69.6803	p53 CDE Pos		ATP5I	CCTAAAACCTCGGGCAGAAG	11	40.2432	p53 CDE Pos		ATP5I	CCTAAAACCTCGGGCAGAAG	8	25.1274	p53 CDE Pos
ATP5I	CCTCTTCTGCCCGAGGTTTT	0	0	p53 CDE Pos		ATP5I	CCTCTTCTGCCCGAGGTTTT	0	0	p53 CDE Pos		ATP5I	CCTCTTCTGCCCGAGGTTTT	0	0	p53 CDE Pos		ATP5I	CCTCTTCTGCCCGAGGTTTT	0	0	p53 CDE Pos		ATP5I	CCTCTTCTGCCCGAGGTTTT	0	0	p53 CDE Pos		ATP5I	CCTCTTCTGCCCGAGGTTTT	0	0	p53 CDE Pos		ATP5I	CCTCTTCTGCCCGAGGTTTT	0	0	p53 CDE Pos		ATP5I	CCTCTTCTGCCCGAGGTTTT	0	0	p53 CDE Pos
ATP5I	CTCGGGCAGAAGAGGAGAGG	43	220.422	p53 CDE Pos		ATP5I	CTCGGGCAGAAGAGGAGAGG	116	444.917	p53 CDE Pos		ATP5I	CTCGGGCAGAAGAGGAGAGG	146	407.58	p53 CDE Pos		ATP5I	CTCGGGCAGAAGAGGAGAGG	39	156.214	p53 CDE Pos		ATP5I	CTCGGGCAGAAGAGGAGAGG	142	384.965	p53 CDE Pos		ATP5I	CTCGGGCAGAAGAGGAGAGG	59	342.595	p53 CDE Pos		ATP5I	CTCGGGCAGAAGAGGAGAGG	41	149.997	p53 CDE Pos		ATP5I	CTCGGGCAGAAGAGGAGAGG	57	179.033	p53 CDE Pos
ATP5I	GAAACGGATTGCCAGAGAAT	26	133.279	p53 CDE Pos		ATP5I	GAAACGGATTGCCAGAGAAT	34	130.407	p53 CDE Pos		ATP5I	GAAACGGATTGCCAGAGAAT	43	120.041	p53 CDE Pos		ATP5I	GAAACGGATTGCCAGAGAAT	23	92.126	p53 CDE Pos		ATP5I	GAAACGGATTGCCAGAGAAT	86	233.148	p53 CDE Pos		ATP5I	GAAACGGATTGCCAGAGAAT	21	121.941	p53 CDE Pos		ATP5I	GAAACGGATTGCCAGAGAAT	6	21.9508	p53 CDE Pos		ATP5I	GAAACGGATTGCCAGAGAAT	0	0	p53 CDE Pos
ATP5I	GGAGAGGAAGAATTAACCAA	25	128.153	p53 CDE Pos		ATP5I	GGAGAGGAAGAATTAACCAA	31	118.9	p53 CDE Pos		ATP5I	GGAGAGGAAGAATTAACCAA	32	89.3326	p53 CDE Pos		ATP5I	GGAGAGGAAGAATTAACCAA	35	140.192	p53 CDE Pos		ATP5I	GGAGAGGAAGAATTAACCAA	64	173.505	p53 CDE Pos		ATP5I	GGAGAGGAAGAATTAACCAA	32	185.814	p53 CDE Pos		ATP5I	GGAGAGGAAGAATTAACCAA	0	0	p53 CDE Pos		ATP5I	GGAGAGGAAGAATTAACCAA	5	15.7047	p53 CDE Pos
ATP5I	GTGTCACTGTCCTCTCCAGG	36	184.54	p53 CDE Pos		ATP5I	GTGTCACTGTCCTCTCCAGG	58	222.458	p53 CDE Pos		ATP5I	GTGTCACTGTCCTCTCCAGG	22	61.4161	p53 CDE Pos		ATP5I	GTGTCACTGTCCTCTCCAGG	18	72.0986	p53 CDE Pos		ATP5I	GTGTCACTGTCCTCTCCAGG	97	262.969	p53 CDE Pos		ATP5I	GTGTCACTGTCCTCTCCAGG	31	180.008	p53 CDE Pos		ATP5I	GTGTCACTGTCCTCTCCAGG	4	14.6339	p53 CDE Pos		ATP5I	GTGTCACTGTCCTCTCCAGG	12	37.6912	p53 CDE Pos
ATP5I	TCAGACGGTGACTCACCCCA	24	123.026	p53 CDE Pos		ATP5I	TCAGACGGTGACTCACCCCA	77	295.333	p53 CDE Pos		ATP5I	TCAGACGGTGACTCACCCCA	32	89.3326	p53 CDE Pos		ATP5I	TCAGACGGTGACTCACCCCA	29	116.159	p53 CDE Pos		ATP5I	TCAGACGGTGACTCACCCCA	96	260.258	p53 CDE Pos		ATP5I	TCAGACGGTGACTCACCCCA	19	110.327	p53 CDE Pos		ATP5I	TCAGACGGTGACTCACCCCA	14	51.2186	p53 CDE Pos		ATP5I	TCAGACGGTGACTCACCCCA	7	21.9865	p53 CDE Pos
ATP5I	TTAGATTTCCCACTACACCT	88	451.097	p53 CDE Pos		ATP5I	TTAGATTTCCCACTACACCT	86	329.852	p53 CDE Pos		ATP5I	TTAGATTTCCCACTACACCT	83	231.706	p53 CDE Pos		ATP5I	TTAGATTTCCCACTACACCT	48	192.263	p53 CDE Pos		ATP5I	TTAGATTTCCCACTACACCT	176	477.139	p53 CDE Pos		ATP5I	TTAGATTTCCCACTACACCT	81	470.342	p53 CDE Pos		ATP5I	TTAGATTTCCCACTACACCT	39	142.68	p53 CDE Pos		ATP5I	TTAGATTTCCCACTACACCT	11	34.5502	p53 CDE Pos
ATP6V0A4	AAACCATCTGGACAATTCCC	71	363.953	p53 CDE Pos		ATP6V0A4	AAACCATCTGGACAATTCCC	53	203.281	p53 CDE Pos		ATP6V0A4	AAACCATCTGGACAATTCCC	100	279.164	p53 CDE Pos		ATP6V0A4	AAACCATCTGGACAATTCCC	72	288.395	p53 CDE Pos		ATP6V0A4	AAACCATCTGGACAATTCCC	67	181.638	p53 CDE Pos		ATP6V0A4	AAACCATCTGGACAATTCCC	35	203.234	p53 CDE Pos		ATP6V0A4	AAACCATCTGGACAATTCCC	42	153.656	p53 CDE Pos		ATP6V0A4	AAACCATCTGGACAATTCCC	33	103.651	p53 CDE Pos
ATP6V0A4	AGAAGAGCCAAAGATGTTCA	85	435.719	p53 CDE Pos		ATP6V0A4	AGAAGAGCCAAAGATGTTCA	56	214.787	p53 CDE Pos		ATP6V0A4	AGAAGAGCCAAAGATGTTCA	192	535.995	p53 CDE Pos		ATP6V0A4	AGAAGAGCCAAAGATGTTCA	137	548.751	p53 CDE Pos		ATP6V0A4	AGAAGAGCCAAAGATGTTCA	90	243.992	p53 CDE Pos		ATP6V0A4	AGAAGAGCCAAAGATGTTCA	66	383.242	p53 CDE Pos		ATP6V0A4	AGAAGAGCCAAAGATGTTCA	109	398.774	p53 CDE Pos		ATP6V0A4	AGAAGAGCCAAAGATGTTCA	25	78.5233	p53 CDE Pos
ATP6V0A4	CCAGGGTAATCATTTCCCGT	27	138.405	p53 CDE Pos		ATP6V0A4	CCAGGGTAATCATTTCCCGT	10	38.3549	p53 CDE Pos		ATP6V0A4	CCAGGGTAATCATTTCCCGT	19	53.0412	p53 CDE Pos		ATP6V0A4	CCAGGGTAATCATTTCCCGT	48	192.263	p53 CDE Pos		ATP6V0A4	CCAGGGTAATCATTTCCCGT	66	178.927	p53 CDE Pos		ATP6V0A4	CCAGGGTAATCATTTCCCGT	21	121.941	p53 CDE Pos		ATP6V0A4	CCAGGGTAATCATTTCCCGT	2	7.31695	p53 CDE Pos		ATP6V0A4	CCAGGGTAATCATTTCCCGT	0	0	p53 CDE Pos
ATP6V0A4	CCATGTTCAGAAACGGCACA	32	164.035	p53 CDE Pos		ATP6V0A4	CCATGTTCAGAAACGGCACA	50	191.774	p53 CDE Pos		ATP6V0A4	CCATGTTCAGAAACGGCACA	108	301.497	p53 CDE Pos		ATP6V0A4	CCATGTTCAGAAACGGCACA	51	204.279	p53 CDE Pos		ATP6V0A4	CCATGTTCAGAAACGGCACA	65	176.216	p53 CDE Pos		ATP6V0A4	CCATGTTCAGAAACGGCACA	40	232.268	p53 CDE Pos		ATP6V0A4	CCATGTTCAGAAACGGCACA	2025	7408.41	p53 CDE Pos		ATP6V0A4	CCATGTTCAGAAACGGCACA	2470	7758.1	p53 CDE Pos
ATP6V0A4	CTCGTATAAAATGAAGATGT	8	41.0088	p53 CDE Pos		ATP6V0A4	CTCGTATAAAATGAAGATGT	37	141.913	p53 CDE Pos		ATP6V0A4	CTCGTATAAAATGAAGATGT	83	231.706	p53 CDE Pos		ATP6V0A4	CTCGTATAAAATGAAGATGT	48	192.263	p53 CDE Pos		ATP6V0A4	CTCGTATAAAATGAAGATGT	33	89.4636	p53 CDE Pos		ATP6V0A4	CTCGTATAAAATGAAGATGT	20	116.134	p53 CDE Pos		ATP6V0A4	CTCGTATAAAATGAAGATGT	206	753.646	p53 CDE Pos		ATP6V0A4	CTCGTATAAAATGAAGATGT	85	266.979	p53 CDE Pos
ATP6V0A4	GATGAGCCAGGAGTGCCAGT	36	184.54	p53 CDE Pos		ATP6V0A4	GATGAGCCAGGAGTGCCAGT	67	256.978	p53 CDE Pos		ATP6V0A4	GATGAGCCAGGAGTGCCAGT	52	145.165	p53 CDE Pos		ATP6V0A4	GATGAGCCAGGAGTGCCAGT	38	152.208	p53 CDE Pos		ATP6V0A4	GATGAGCCAGGAGTGCCAGT	71	192.482	p53 CDE Pos		ATP6V0A4	GATGAGCCAGGAGTGCCAGT	42	243.881	p53 CDE Pos		ATP6V0A4	GATGAGCCAGGAGTGCCAGT	36	131.705	p53 CDE Pos		ATP6V0A4	GATGAGCCAGGAGTGCCAGT	186	584.213	p53 CDE Pos
ATP6V0A4	GCACTGCTTTCAACTCCAGG	58	297.314	p53 CDE Pos		ATP6V0A4	GCACTGCTTTCAACTCCAGG	87	333.687	p53 CDE Pos		ATP6V0A4	GCACTGCTTTCAACTCCAGG	100	279.164	p53 CDE Pos		ATP6V0A4	GCACTGCTTTCAACTCCAGG	49	196.268	p53 CDE Pos		ATP6V0A4	GCACTGCTTTCAACTCCAGG	115	311.767	p53 CDE Pos		ATP6V0A4	GCACTGCTTTCAACTCCAGG	54	313.562	p53 CDE Pos		ATP6V0A4	GCACTGCTTTCAACTCCAGG	43	157.314	p53 CDE Pos		ATP6V0A4	GCACTGCTTTCAACTCCAGG	42	131.919	p53 CDE Pos
ATP6V0A4	GGATTTCCAAAATACACTCC	50	256.305	p53 CDE Pos		ATP6V0A4	GGATTTCCAAAATACACTCC	66	253.142	p53 CDE Pos		ATP6V0A4	GGATTTCCAAAATACACTCC	132	368.497	p53 CDE Pos		ATP6V0A4	GGATTTCCAAAATACACTCC	34	136.186	p53 CDE Pos		ATP6V0A4	GGATTTCCAAAATACACTCC	108	292.79	p53 CDE Pos		ATP6V0A4	GGATTTCCAAAATACACTCC	39	226.461	p53 CDE Pos		ATP6V0A4	GGATTTCCAAAATACACTCC	0	0	p53 CDE Pos		ATP6V0A4	GGATTTCCAAAATACACTCC	28	87.9461	p53 CDE Pos
ATP6V0A4	GTAGGATCAGATAGCGCCCG	55	281.936	p53 CDE Pos		ATP6V0A4	GTAGGATCAGATAGCGCCCG	93	356.7	p53 CDE Pos		ATP6V0A4	GTAGGATCAGATAGCGCCCG	111	309.872	p53 CDE Pos		ATP6V0A4	GTAGGATCAGATAGCGCCCG	38	152.208	p53 CDE Pos		ATP6V0A4	GTAGGATCAGATAGCGCCCG	97	262.969	p53 CDE Pos		ATP6V0A4	GTAGGATCAGATAGCGCCCG	68	394.855	p53 CDE Pos		ATP6V0A4	GTAGGATCAGATAGCGCCCG	66	241.459	p53 CDE Pos		ATP6V0A4	GTAGGATCAGATAGCGCCCG	47	147.624	p53 CDE Pos
ATP6V0A4	GTCACAACTGTTTCTCCAGG	41	210.17	p53 CDE Pos		ATP6V0A4	GTCACAACTGTTTCTCCAGG	39	149.584	p53 CDE Pos		ATP6V0A4	GTCACAACTGTTTCTCCAGG	47	131.207	p53 CDE Pos		ATP6V0A4	GTCACAACTGTTTCTCCAGG	31	124.17	p53 CDE Pos		ATP6V0A4	GTCACAACTGTTTCTCCAGG	53	143.684	p53 CDE Pos		ATP6V0A4	GTCACAACTGTTTCTCCAGG	15	87.1004	p53 CDE Pos		ATP6V0A4	GTCACAACTGTTTCTCCAGG	120	439.017	p53 CDE Pos		ATP6V0A4	GTCACAACTGTTTCTCCAGG	72	226.147	p53 CDE Pos
ATP8B4	TCGAACGACCACGCTCAATG	16	82.0176	p53 CDE Neg		ATP8B4	TCGAACGACCACGCTCAATG	45	172.597	p53 CDE Neg		ATP8B4	TCGAACGACCACGCTCAATG	152	424.33	p53 CDE Neg		ATP8B4	TCGAACGACCACGCTCAATG	82	328.449	p53 CDE Neg		ATP8B4	TCGAACGACCACGCTCAATG	87	235.859	p53 CDE Neg		ATP8B4	TCGAACGACCACGCTCAATG	53	307.755	p53 CDE Neg		ATP8B4	TCGAACGACCACGCTCAATG	2	7.31695	p53 CDE Neg		ATP8B4	TCGAACGACCACGCTCAATG	10	31.4093	p53 CDE Neg
ATP8B4	CAGATATCAGCAGACTTGCA	119	610.006	p53 CDE Neg		ATP8B4	CAGATATCAGCAGACTTGCA	106	406.562	p53 CDE Neg		ATP8B4	CAGATATCAGCAGACTTGCA	219	611.37	p53 CDE Neg		ATP8B4	CAGATATCAGCAGACTTGCA	119	476.652	p53 CDE Neg		ATP8B4	CAGATATCAGCAGACTTGCA	147	398.52	p53 CDE Neg		ATP8B4	CAGATATCAGCAGACTTGCA	97	563.249	p53 CDE Neg		ATP8B4	CAGATATCAGCAGACTTGCA	123	449.992	p53 CDE Neg		ATP8B4	CAGATATCAGCAGACTTGCA	67	210.442	p53 CDE Neg
ATP8B4	TTAGAAACTGCCATCAACAT	71	363.953	p53 CDE Neg		ATP8B4	TTAGAAACTGCCATCAACAT	141	540.804	p53 CDE Neg		ATP8B4	TTAGAAACTGCCATCAACAT	139	388.038	p53 CDE Neg		ATP8B4	TTAGAAACTGCCATCAACAT	88	352.482	p53 CDE Neg		ATP8B4	TTAGAAACTGCCATCAACAT	149	403.942	p53 CDE Neg		ATP8B4	TTAGAAACTGCCATCAACAT	75	435.502	p53 CDE Neg		ATP8B4	TTAGAAACTGCCATCAACAT	117	428.041	p53 CDE Neg		ATP8B4	TTAGAAACTGCCATCAACAT	265	832.347	p53 CDE Neg
ATP8B4	TTTCTCAGTCAAATCTCAAG	50	256.305	p53 CDE Neg		ATP8B4	TTTCTCAGTCAAATCTCAAG	43	164.926	p53 CDE Neg		ATP8B4	TTTCTCAGTCAAATCTCAAG	168	468.996	p53 CDE Neg		ATP8B4	TTTCTCAGTCAAATCTCAAG	182	728.997	p53 CDE Neg		ATP8B4	TTTCTCAGTCAAATCTCAAG	85	230.437	p53 CDE Neg		ATP8B4	TTTCTCAGTCAAATCTCAAG	23	133.554	p53 CDE Neg		ATP8B4	TTTCTCAGTCAAATCTCAAG	27	98.7788	p53 CDE Neg		ATP8B4	TTTCTCAGTCAAATCTCAAG	52	163.328	p53 CDE Neg
ATP8B4	CGGAGGCACTTACACTGAGG	18	92.2698	p53 CDE Neg		ATP8B4	CGGAGGCACTTACACTGAGG	23	88.2162	p53 CDE Neg		ATP8B4	CGGAGGCACTTACACTGAGG	26	72.5827	p53 CDE Neg		ATP8B4	CGGAGGCACTTACACTGAGG	17	68.0932	p53 CDE Neg		ATP8B4	CGGAGGCACTTACACTGAGG	13	35.2432	p53 CDE Neg		ATP8B4	CGGAGGCACTTACACTGAGG	11	63.8736	p53 CDE Neg		ATP8B4	CGGAGGCACTTACACTGAGG	17	62.1941	p53 CDE Neg		ATP8B4	CGGAGGCACTTACACTGAGG	23	72.2414	p53 CDE Neg
ATP8B4	ATGTCAGAAGAGAATAGCGC	28	143.531	p53 CDE Neg		ATP8B4	ATGTCAGAAGAGAATAGCGC	35	134.242	p53 CDE Neg		ATP8B4	ATGTCAGAAGAGAATAGCGC	41	114.457	p53 CDE Neg		ATP8B4	ATGTCAGAAGAGAATAGCGC	73	292.4	p53 CDE Neg		ATP8B4	ATGTCAGAAGAGAATAGCGC	36	97.5967	p53 CDE Neg		ATP8B4	ATGTCAGAAGAGAATAGCGC	40	232.268	p53 CDE Neg		ATP8B4	ATGTCAGAAGAGAATAGCGC	153	559.747	p53 CDE Neg		ATP8B4	ATGTCAGAAGAGAATAGCGC	0	0	p53 CDE Neg
ATP8B4	AATCTGGGAGAGTCAAACTG	0	0	p53 CDE Neg		ATP8B4	AATCTGGGAGAGTCAAACTG	0	0	p53 CDE Neg		ATP8B4	AATCTGGGAGAGTCAAACTG	0	0	p53 CDE Neg		ATP8B4	AATCTGGGAGAGTCAAACTG	0	0	p53 CDE Neg		ATP8B4	AATCTGGGAGAGTCAAACTG	0	0	p53 CDE Neg		ATP8B4	AATCTGGGAGAGTCAAACTG	0	0	p53 CDE Neg		ATP8B4	AATCTGGGAGAGTCAAACTG	0	0	p53 CDE Neg		ATP8B4	AATCTGGGAGAGTCAAACTG	0	0	p53 CDE Neg
ATP8B4	TAGGCAAACTCACCAAACTG	32	164.035	p53 CDE Neg		ATP8B4	TAGGCAAACTCACCAAACTG	55	210.952	p53 CDE Neg		ATP8B4	TAGGCAAACTCACCAAACTG	45	125.624	p53 CDE Neg		ATP8B4	TAGGCAAACTCACCAAACTG	66	264.362	p53 CDE Neg		ATP8B4	TAGGCAAACTCACCAAACTG	64	173.505	p53 CDE Neg		ATP8B4	TAGGCAAACTCACCAAACTG	47	272.915	p53 CDE Neg		ATP8B4	TAGGCAAACTCACCAAACTG	120	439.017	p53 CDE Neg		ATP8B4	TAGGCAAACTCACCAAACTG	72	226.147	p53 CDE Neg
ATP8B4	AATGAACCCAAAATTTCTAG	44	225.548	p53 CDE Neg		ATP8B4	AATGAACCCAAAATTTCTAG	41	157.255	p53 CDE Neg		ATP8B4	AATGAACCCAAAATTTCTAG	124	346.164	p53 CDE Neg		ATP8B4	AATGAACCCAAAATTTCTAG	120	480.658	p53 CDE Neg		ATP8B4	AATGAACCCAAAATTTCTAG	71	192.482	p53 CDE Neg		ATP8B4	AATGAACCCAAAATTTCTAG	38	220.654	p53 CDE Neg		ATP8B4	AATGAACCCAAAATTTCTAG	8	29.2678	p53 CDE Neg		ATP8B4	AATGAACCCAAAATTTCTAG	0	0	p53 CDE Neg
ATP8B4	AATACTCACATAGTCATCTG	34	174.287	p53 CDE Neg		ATP8B4	AATACTCACATAGTCATCTG	73	279.991	p53 CDE Neg		ATP8B4	AATACTCACATAGTCATCTG	67	187.04	p53 CDE Neg		ATP8B4	AATACTCACATAGTCATCTG	102	408.559	p53 CDE Neg		ATP8B4	AATACTCACATAGTCATCTG	128	347.01	p53 CDE Neg		ATP8B4	AATACTCACATAGTCATCTG	61	354.208	p53 CDE Neg		ATP8B4	AATACTCACATAGTCATCTG	234	856.083	p53 CDE Neg		ATP8B4	AATACTCACATAGTCATCTG	240	753.823	p53 CDE Neg
AVIL	AGAATGGTCGATGATGGCAA	39	199.918	p53 CDE Neutral		AVIL	AGAATGGTCGATGATGGCAA	22	84.3807	p53 CDE Neutral		AVIL	AGAATGGTCGATGATGGCAA	45	125.624	p53 CDE Neutral		AVIL	AGAATGGTCGATGATGGCAA	9	36.0493	p53 CDE Neutral		AVIL	AGAATGGTCGATGATGGCAA	18	48.7983	p53 CDE Neutral		AVIL	AGAATGGTCGATGATGGCAA	10	58.067	p53 CDE Neutral		AVIL	AGAATGGTCGATGATGGCAA	41	149.997	p53 CDE Neutral		AVIL	AGAATGGTCGATGATGGCAA	163	511.972	p53 CDE Neutral
AVIL	CAAATCTAACACCAAAGCAG	71	363.953	p53 CDE Neutral		AVIL	CAAATCTAACACCAAAGCAG	101	387.384	p53 CDE Neutral		AVIL	CAAATCTAACACCAAAGCAG	76	212.165	p53 CDE Neutral		AVIL	CAAATCTAACACCAAAGCAG	70	280.384	p53 CDE Neutral		AVIL	CAAATCTAACACCAAAGCAG	118	319.9	p53 CDE Neutral		AVIL	CAAATCTAACACCAAAGCAG	67	389.049	p53 CDE Neutral		AVIL	CAAATCTAACACCAAAGCAG	27	98.7788	p53 CDE Neutral		AVIL	CAAATCTAACACCAAAGCAG	44	138.201	p53 CDE Neutral
AVIL	CAGATGTACAAGATGTGATG	23	117.9	p53 CDE Neutral		AVIL	CAGATGTACAAGATGTGATG	37	141.913	p53 CDE Neutral		AVIL	CAGATGTACAAGATGTGATG	77	214.957	p53 CDE Neutral		AVIL	CAGATGTACAAGATGTGATG	81	324.444	p53 CDE Neutral		AVIL	CAGATGTACAAGATGTGATG	83	225.015	p53 CDE Neutral		AVIL	CAGATGTACAAGATGTGATG	35	203.234	p53 CDE Neutral		AVIL	CAGATGTACAAGATGTGATG	17	62.1941	p53 CDE Neutral		AVIL	CAGATGTACAAGATGTGATG	21	65.9595	p53 CDE Neutral
AVIL	CATGAGTCAGACACTTTCCG	67	343.449	p53 CDE Neutral		AVIL	CATGAGTCAGACACTTTCCG	68	260.813	p53 CDE Neutral		AVIL	CATGAGTCAGACACTTTCCG	122	340.58	p53 CDE Neutral		AVIL	CATGAGTCAGACACTTTCCG	77	308.422	p53 CDE Neutral		AVIL	CATGAGTCAGACACTTTCCG	88	238.57	p53 CDE Neutral		AVIL	CATGAGTCAGACACTTTCCG	51	296.141	p53 CDE Neutral		AVIL	CATGAGTCAGACACTTTCCG	17	62.1941	p53 CDE Neutral		AVIL	CATGAGTCAGACACTTTCCG	72	226.147	p53 CDE Neutral
AVIL	CCAGCAAGAAGACATCACCT	52	266.557	p53 CDE Neutral		AVIL	CCAGCAAGAAGACATCACCT	64	245.471	p53 CDE Neutral		AVIL	CCAGCAAGAAGACATCACCT	93	259.623	p53 CDE Neutral		AVIL	CCAGCAAGAAGACATCACCT	46	184.252	p53 CDE Neutral		AVIL	CCAGCAAGAAGACATCACCT	101	273.813	p53 CDE Neutral		AVIL	CCAGCAAGAAGACATCACCT	36	209.041	p53 CDE Neutral		AVIL	CCAGCAAGAAGACATCACCT	15	54.8771	p53 CDE Neutral		AVIL	CCAGCAAGAAGACATCACCT	19	59.6777	p53 CDE Neutral
AVIL	CCATACCATTGATACTCCAC	12	61.5132	p53 CDE Neutral		AVIL	CCATACCATTGATACTCCAC	42	161.091	p53 CDE Neutral		AVIL	CCATACCATTGATACTCCAC	36	100.499	p53 CDE Neutral		AVIL	CCATACCATTGATACTCCAC	39	156.214	p53 CDE Neutral		AVIL	CCATACCATTGATACTCCAC	40	108.441	p53 CDE Neutral		AVIL	CCATACCATTGATACTCCAC	24	139.361	p53 CDE Neutral		AVIL	CCATACCATTGATACTCCAC	0	0	p53 CDE Neutral		AVIL	CCATACCATTGATACTCCAC	0	0	p53 CDE Neutral
AVIL	CTCAGGCAGAGCACTACCTG	33	169.161	p53 CDE Neutral		AVIL	CTCAGGCAGAGCACTACCTG	50	191.774	p53 CDE Neutral		AVIL	CTCAGGCAGAGCACTACCTG	27	75.3744	p53 CDE Neutral		AVIL	CTCAGGCAGAGCACTACCTG	33	132.181	p53 CDE Neutral		AVIL	CTCAGGCAGAGCACTACCTG	127	344.299	p53 CDE Neutral		AVIL	CTCAGGCAGAGCACTACCTG	53	307.755	p53 CDE Neutral		AVIL	CTCAGGCAGAGCACTACCTG	123	449.992	p53 CDE Neutral		AVIL	CTCAGGCAGAGCACTACCTG	88	276.402	p53 CDE Neutral
AVIL	GACATCATTGGAGTTTAGGG	63	322.944	p53 CDE Neutral		AVIL	GACATCATTGGAGTTTAGGG	58	222.458	p53 CDE Neutral		AVIL	GACATCATTGGAGTTTAGGG	48	133.999	p53 CDE Neutral		AVIL	GACATCATTGGAGTTTAGGG	37	148.203	p53 CDE Neutral		AVIL	GACATCATTGGAGTTTAGGG	73	197.904	p53 CDE Neutral		AVIL	GACATCATTGGAGTTTAGGG	39	226.461	p53 CDE Neutral		AVIL	GACATCATTGGAGTTTAGGG	28	102.437	p53 CDE Neutral		AVIL	GACATCATTGGAGTTTAGGG	51	160.187	p53 CDE Neutral
AVIL	GCTAAAATAGGAGTGATCGA	33	169.161	p53 CDE Neutral		AVIL	GCTAAAATAGGAGTGATCGA	51	195.61	p53 CDE Neutral		AVIL	GCTAAAATAGGAGTGATCGA	107	298.706	p53 CDE Neutral		AVIL	GCTAAAATAGGAGTGATCGA	76	304.416	p53 CDE Neutral		AVIL	GCTAAAATAGGAGTGATCGA	58	157.239	p53 CDE Neutral		AVIL	GCTAAAATAGGAGTGATCGA	38	220.654	p53 CDE Neutral		AVIL	GCTAAAATAGGAGTGATCGA	11	40.2432	p53 CDE Neutral		AVIL	GCTAAAATAGGAGTGATCGA	1	3.14093	p53 CDE Neutral
AVIL	TGAGATCACAGACTTCACCC	26	133.279	p53 CDE Neutral		AVIL	TGAGATCACAGACTTCACCC	41	157.255	p53 CDE Neutral		AVIL	TGAGATCACAGACTTCACCC	19	53.0412	p53 CDE Neutral		AVIL	TGAGATCACAGACTTCACCC	8	32.0438	p53 CDE Neutral		AVIL	TGAGATCACAGACTTCACCC	60	162.661	p53 CDE Neutral		AVIL	TGAGATCACAGACTTCACCC	15	87.1004	p53 CDE Neutral		AVIL	TGAGATCACAGACTTCACCC	0	0	p53 CDE Neutral		AVIL	TGAGATCACAGACTTCACCC	16	50.2549	p53 CDE Neutral
AZIN1	ACGATGAACATGTTAGACAT	36	184.54	p53 CDE Pos		AZIN1	ACGATGAACATGTTAGACAT	114	437.246	p53 CDE Pos		AZIN1	ACGATGAACATGTTAGACAT	77	214.957	p53 CDE Pos		AZIN1	ACGATGAACATGTTAGACAT	32	128.175	p53 CDE Pos		AZIN1	ACGATGAACATGTTAGACAT	118	319.9	p53 CDE Pos		AZIN1	ACGATGAACATGTTAGACAT	34	197.428	p53 CDE Pos		AZIN1	ACGATGAACATGTTAGACAT	3	10.9754	p53 CDE Pos		AZIN1	ACGATGAACATGTTAGACAT	35	109.933	p53 CDE Pos
AZIN1	ATGAACATGTTAGACATTGG	42	215.296	p53 CDE Pos		AZIN1	ATGAACATGTTAGACATTGG	49	187.939	p53 CDE Pos		AZIN1	ATGAACATGTTAGACATTGG	51	142.374	p53 CDE Pos		AZIN1	ATGAACATGTTAGACATTGG	12	48.0658	p53 CDE Pos		AZIN1	ATGAACATGTTAGACATTGG	81	219.593	p53 CDE Pos		AZIN1	ATGAACATGTTAGACATTGG	42	243.881	p53 CDE Pos		AZIN1	ATGAACATGTTAGACATTGG	12	43.9017	p53 CDE Pos		AZIN1	ATGAACATGTTAGACATTGG	42	131.919	p53 CDE Pos
AZIN1	CAAAGGCTGCTTGTAAACAG	35	179.414	p53 CDE Pos		AZIN1	CAAAGGCTGCTTGTAAACAG	43	164.926	p53 CDE Pos		AZIN1	CAAAGGCTGCTTGTAAACAG	33	92.1242	p53 CDE Pos		AZIN1	CAAAGGCTGCTTGTAAACAG	17	68.0932	p53 CDE Pos		AZIN1	CAAAGGCTGCTTGTAAACAG	95	257.547	p53 CDE Pos		AZIN1	CAAAGGCTGCTTGTAAACAG	38	220.654	p53 CDE Pos		AZIN1	CAAAGGCTGCTTGTAAACAG	0	0	p53 CDE Pos		AZIN1	CAAAGGCTGCTTGTAAACAG	3	9.42279	p53 CDE Pos
AZIN1	CTATGTTTATGAACATACCC	56	287.062	p53 CDE Pos		AZIN1	CTATGTTTATGAACATACCC	108	414.233	p53 CDE Pos		AZIN1	CTATGTTTATGAACATACCC	57	159.124	p53 CDE Pos		AZIN1	CTATGTTTATGAACATACCC	171	684.937	p53 CDE Pos		AZIN1	CTATGTTTATGAACATACCC	118	319.9	p53 CDE Pos		AZIN1	CTATGTTTATGAACATACCC	61	354.208	p53 CDE Pos		AZIN1	CTATGTTTATGAACATACCC	6	21.9508	p53 CDE Pos		AZIN1	CTATGTTTATGAACATACCC	0	0	p53 CDE Pos
AZIN1	CTGCTTTTAATGATTTTCAG	0	0	p53 CDE Pos		AZIN1	CTGCTTTTAATGATTTTCAG	0	0	p53 CDE Pos		AZIN1	CTGCTTTTAATGATTTTCAG	0	0	p53 CDE Pos		AZIN1	CTGCTTTTAATGATTTTCAG	0	0	p53 CDE Pos		AZIN1	CTGCTTTTAATGATTTTCAG	0	0	p53 CDE Pos		AZIN1	CTGCTTTTAATGATTTTCAG	0	0	p53 CDE Pos		AZIN1	CTGCTTTTAATGATTTTCAG	0	0	p53 CDE Pos		AZIN1	CTGCTTTTAATGATTTTCAG	0	0	p53 CDE Pos
AZIN1	GCAACAGAAGATAATATTGG	47	240.927	p53 CDE Pos		AZIN1	GCAACAGAAGATAATATTGG	42	161.091	p53 CDE Pos		AZIN1	GCAACAGAAGATAATATTGG	56	156.332	p53 CDE Pos		AZIN1	GCAACAGAAGATAATATTGG	8	32.0438	p53 CDE Pos		AZIN1	GCAACAGAAGATAATATTGG	88	238.57	p53 CDE Pos		AZIN1	GCAACAGAAGATAATATTGG	31	180.008	p53 CDE Pos		AZIN1	GCAACAGAAGATAATATTGG	41	149.997	p53 CDE Pos		AZIN1	GCAACAGAAGATAATATTGG	7	21.9865	p53 CDE Pos
AZIN1	GCACTACCCTGAAGAACTGT	53	271.683	p53 CDE Pos		AZIN1	GCACTACCCTGAAGAACTGT	58	222.458	p53 CDE Pos		AZIN1	GCACTACCCTGAAGAACTGT	31	86.5409	p53 CDE Pos		AZIN1	GCACTACCCTGAAGAACTGT	39	156.214	p53 CDE Pos		AZIN1	GCACTACCCTGAAGAACTGT	67	181.638	p53 CDE Pos		AZIN1	GCACTACCCTGAAGAACTGT	44	255.495	p53 CDE Pos		AZIN1	GCACTACCCTGAAGAACTGT	8	29.2678	p53 CDE Pos		AZIN1	GCACTACCCTGAAGAACTGT	1	3.14093	p53 CDE Pos
AZIN1	GGAAAGTAGATATCCAACAG	28	143.531	p53 CDE Pos		AZIN1	GGAAAGTAGATATCCAACAG	57	218.623	p53 CDE Pos		AZIN1	GGAAAGTAGATATCCAACAG	60	167.499	p53 CDE Pos		AZIN1	GGAAAGTAGATATCCAACAG	10	40.0548	p53 CDE Pos		AZIN1	GGAAAGTAGATATCCAACAG	79	214.17	p53 CDE Pos		AZIN1	GGAAAGTAGATATCCAACAG	19	110.327	p53 CDE Pos		AZIN1	GGAAAGTAGATATCCAACAG	4	14.6339	p53 CDE Pos		AZIN1	GGAAAGTAGATATCCAACAG	3	9.42279	p53 CDE Pos
AZIN1	GGACTTAAATACCATTCCAG	43	220.422	p53 CDE Pos		AZIN1	GGACTTAAATACCATTCCAG	64	245.471	p53 CDE Pos		AZIN1	GGACTTAAATACCATTCCAG	92	256.831	p53 CDE Pos		AZIN1	GGACTTAAATACCATTCCAG	40	160.219	p53 CDE Pos		AZIN1	GGACTTAAATACCATTCCAG	105	284.657	p53 CDE Pos		AZIN1	GGACTTAAATACCATTCCAG	47	272.915	p53 CDE Pos		AZIN1	GGACTTAAATACCATTCCAG	61	223.167	p53 CDE Pos		AZIN1	GGACTTAAATACCATTCCAG	13	40.8321	p53 CDE Pos
AZIN1	GGTTTGTTCCTTCATCCAAC	43	220.422	p53 CDE Pos		AZIN1	GGTTTGTTCCTTCATCCAAC	49	187.939	p53 CDE Pos		AZIN1	GGTTTGTTCCTTCATCCAAC	25	69.7911	p53 CDE Pos		AZIN1	GGTTTGTTCCTTCATCCAAC	74	296.405	p53 CDE Pos		AZIN1	GGTTTGTTCCTTCATCCAAC	95	257.547	p53 CDE Pos		AZIN1	GGTTTGTTCCTTCATCCAAC	35	203.234	p53 CDE Pos		AZIN1	GGTTTGTTCCTTCATCCAAC	54	197.558	p53 CDE Pos		AZIN1	GGTTTGTTCCTTCATCCAAC	25	78.5233	p53 CDE Pos
B2M	AAGTCAACTTCAATGTCGGA	24	123.026	p53 CDE Neutral		B2M	AAGTCAACTTCAATGTCGGA	40	153.42	p53 CDE Neutral		B2M	AAGTCAACTTCAATGTCGGA	89	248.456	p53 CDE Neutral		B2M	AAGTCAACTTCAATGTCGGA	41	164.225	p53 CDE Neutral		B2M	AAGTCAACTTCAATGTCGGA	55	149.106	p53 CDE Neutral		B2M	AAGTCAACTTCAATGTCGGA	21	121.941	p53 CDE Neutral		B2M	AAGTCAACTTCAATGTCGGA	37	135.364	p53 CDE Neutral		B2M	AAGTCAACTTCAATGTCGGA	31	97.3688	p53 CDE Neutral
B2M	ACAAAGTCACATGGTTCACA	46	235.801	p53 CDE Neutral		B2M	ACAAAGTCACATGGTTCACA	106	406.562	p53 CDE Neutral		B2M	ACAAAGTCACATGGTTCACA	91	254.04	p53 CDE Neutral		B2M	ACAAAGTCACATGGTTCACA	85	340.466	p53 CDE Neutral		B2M	ACAAAGTCACATGGTTCACA	165	447.318	p53 CDE Neutral		B2M	ACAAAGTCACATGGTTCACA	89	516.796	p53 CDE Neutral		B2M	ACAAAGTCACATGGTTCACA	73	267.069	p53 CDE Neutral		B2M	ACAAAGTCACATGGTTCACA	393	1234.39	p53 CDE Neutral
B2M	ACTCTCTCTTTCTGGCCTGG	0	0	p53 CDE Neutral		B2M	ACTCTCTCTTTCTGGCCTGG	0	0	p53 CDE Neutral		B2M	ACTCTCTCTTTCTGGCCTGG	0	0	p53 CDE Neutral		B2M	ACTCTCTCTTTCTGGCCTGG	0	0	p53 CDE Neutral		B2M	ACTCTCTCTTTCTGGCCTGG	0	0	p53 CDE Neutral		B2M	ACTCTCTCTTTCTGGCCTGG	0	0	p53 CDE Neutral		B2M	ACTCTCTCTTTCTGGCCTGG	0	0	p53 CDE Neutral		B2M	ACTCTCTCTTTCTGGCCTGG	0	0	p53 CDE Neutral
B2M	ACTCTCTCTTTCTGGCCTGG	0	0	p53 CDE Neutral		B2M	ACTCTCTCTTTCTGGCCTGG	0	0	p53 CDE Neutral		B2M	ACTCTCTCTTTCTGGCCTGG	0	0	p53 CDE Neutral		B2M	ACTCTCTCTTTCTGGCCTGG	0	0	p53 CDE Neutral		B2M	ACTCTCTCTTTCTGGCCTGG	0	0	p53 CDE Neutral		B2M	ACTCTCTCTTTCTGGCCTGG	0	0	p53 CDE Neutral		B2M	ACTCTCTCTTTCTGGCCTGG	0	0	p53 CDE Neutral		B2M	ACTCTCTCTTTCTGGCCTGG	0	0	p53 CDE Neutral
B2M	AGTCACATGGTTCACACGGC	34	174.287	p53 CDE Neutral		B2M	AGTCACATGGTTCACACGGC	31	118.9	p53 CDE Neutral		B2M	AGTCACATGGTTCACACGGC	82	228.915	p53 CDE Neutral		B2M	AGTCACATGGTTCACACGGC	25	100.137	p53 CDE Neutral		B2M	AGTCACATGGTTCACACGGC	48	130.129	p53 CDE Neutral		B2M	AGTCACATGGTTCACACGGC	14	81.2937	p53 CDE Neutral		B2M	AGTCACATGGTTCACACGGC	0	0	p53 CDE Neutral		B2M	AGTCACATGGTTCACACGGC	19	59.6777	p53 CDE Neutral
B2M	CGCGAGCACAGCTAAGGCCA	126	645.889	p53 CDE Neutral		B2M	CGCGAGCACAGCTAAGGCCA	135	517.791	p53 CDE Neutral		B2M	CGCGAGCACAGCTAAGGCCA	198	552.745	p53 CDE Neutral		B2M	CGCGAGCACAGCTAAGGCCA	156	624.855	p53 CDE Neutral		B2M	CGCGAGCACAGCTAAGGCCA	206	558.47	p53 CDE Neutral		B2M	CGCGAGCACAGCTAAGGCCA	97	563.249	p53 CDE Neutral		B2M	CGCGAGCACAGCTAAGGCCA	20	73.1695	p53 CDE Neutral		B2M	CGCGAGCACAGCTAAGGCCA	18	56.5367	p53 CDE Neutral
B2M	GAGTAGCGCGAGCACAGCTA	0	0	p53 CDE Neutral		B2M	GAGTAGCGCGAGCACAGCTA	0	0	p53 CDE Neutral		B2M	GAGTAGCGCGAGCACAGCTA	0	0	p53 CDE Neutral		B2M	GAGTAGCGCGAGCACAGCTA	0	0	p53 CDE Neutral		B2M	GAGTAGCGCGAGCACAGCTA	0	0	p53 CDE Neutral		B2M	GAGTAGCGCGAGCACAGCTA	0	0	p53 CDE Neutral		B2M	GAGTAGCGCGAGCACAGCTA	0	0	p53 CDE Neutral		B2M	GAGTAGCGCGAGCACAGCTA	0	0	p53 CDE Neutral
B2M	GAGTAGCGCGAGCACAGCTA	0	0	p53 CDE Neutral		B2M	GAGTAGCGCGAGCACAGCTA	0	0	p53 CDE Neutral		B2M	GAGTAGCGCGAGCACAGCTA	0	0	p53 CDE Neutral		B2M	GAGTAGCGCGAGCACAGCTA	0	0	p53 CDE Neutral		B2M	GAGTAGCGCGAGCACAGCTA	0	0	p53 CDE Neutral		B2M	GAGTAGCGCGAGCACAGCTA	0	0	p53 CDE Neutral		B2M	GAGTAGCGCGAGCACAGCTA	0	0	p53 CDE Neutral		B2M	GAGTAGCGCGAGCACAGCTA	0	0	p53 CDE Neutral
B2M	GGCCGAGATGTCTCGCTCCG	34	174.287	p53 CDE Neutral		B2M	GGCCGAGATGTCTCGCTCCG	71	272.32	p53 CDE Neutral		B2M	GGCCGAGATGTCTCGCTCCG	257	717.452	p53 CDE Neutral		B2M	GGCCGAGATGTCTCGCTCCG	166	664.91	p53 CDE Neutral		B2M	GGCCGAGATGTCTCGCTCCG	90	243.992	p53 CDE Neutral		B2M	GGCCGAGATGTCTCGCTCCG	38	220.654	p53 CDE Neutral		B2M	GGCCGAGATGTCTCGCTCCG	58	212.191	p53 CDE Neutral		B2M	GGCCGAGATGTCTCGCTCCG	53	166.469	p53 CDE Neutral
B2M	TGGGCTGTGACAAAGTCACA	46	235.801	p53 CDE Neutral		B2M	TGGGCTGTGACAAAGTCACA	48	184.103	p53 CDE Neutral		B2M	TGGGCTGTGACAAAGTCACA	16	44.6663	p53 CDE Neutral		B2M	TGGGCTGTGACAAAGTCACA	29	116.159	p53 CDE Neutral		B2M	TGGGCTGTGACAAAGTCACA	46	124.707	p53 CDE Neutral		B2M	TGGGCTGTGACAAAGTCACA	18	104.521	p53 CDE Neutral		B2M	TGGGCTGTGACAAAGTCACA	15	54.8771	p53 CDE Neutral		B2M	TGGGCTGTGACAAAGTCACA	5	15.7047	p53 CDE Neutral
B3GALT4	ATTAGAGGATGTCTTTGTGG	50	256.305	p53 CDE Neutral		B3GALT4	ATTAGAGGATGTCTTTGTGG	44	168.761	p53 CDE Neutral		B3GALT4	ATTAGAGGATGTCTTTGTGG	24	66.9994	p53 CDE Neutral		B3GALT4	ATTAGAGGATGTCTTTGTGG	7	28.0384	p53 CDE Neutral		B3GALT4	ATTAGAGGATGTCTTTGTGG	53	143.684	p53 CDE Neutral		B3GALT4	ATTAGAGGATGTCTTTGTGG	47	272.915	p53 CDE Neutral		B3GALT4	ATTAGAGGATGTCTTTGTGG	1	3.65847	p53 CDE Neutral		B3GALT4	ATTAGAGGATGTCTTTGTGG	0	0	p53 CDE Neutral
B3GALT4	CCCGTGCCTGAGGCATAGGG	34	174.287	p53 CDE Neutral		B3GALT4	CCCGTGCCTGAGGCATAGGG	20	76.7098	p53 CDE Neutral		B3GALT4	CCCGTGCCTGAGGCATAGGG	80	223.331	p53 CDE Neutral		B3GALT4	CCCGTGCCTGAGGCATAGGG	43	172.236	p53 CDE Neutral		B3GALT4	CCCGTGCCTGAGGCATAGGG	39	105.73	p53 CDE Neutral		B3GALT4	CCCGTGCCTGAGGCATAGGG	23	133.554	p53 CDE Neutral		B3GALT4	CCCGTGCCTGAGGCATAGGG	189	691.452	p53 CDE Neutral		B3GALT4	CCCGTGCCTGAGGCATAGGG	150	471.14	p53 CDE Neutral
B3GALT4	CGAACGCACAGCACCCCGTG	49	251.179	p53 CDE Neutral		B3GALT4	CGAACGCACAGCACCCCGTG	46	176.432	p53 CDE Neutral		B3GALT4	CGAACGCACAGCACCCCGTG	59	164.707	p53 CDE Neutral		B3GALT4	CGAACGCACAGCACCCCGTG	52	208.285	p53 CDE Neutral		B3GALT4	CGAACGCACAGCACCCCGTG	56	151.817	p53 CDE Neutral		B3GALT4	CGAACGCACAGCACCCCGTG	19	110.327	p53 CDE Neutral		B3GALT4	CGAACGCACAGCACCCCGTG	87	318.287	p53 CDE Neutral		B3GALT4	CGAACGCACAGCACCCCGTG	99	310.952	p53 CDE Neutral
B3GALT4	CTCACCCTAAAGACCCTCAG	79	404.962	p53 CDE Neutral		B3GALT4	CTCACCCTAAAGACCCTCAG	105	402.726	p53 CDE Neutral		B3GALT4	CTCACCCTAAAGACCCTCAG	175	488.538	p53 CDE Neutral		B3GALT4	CTCACCCTAAAGACCCTCAG	143	572.784	p53 CDE Neutral		B3GALT4	CTCACCCTAAAGACCCTCAG	145	393.098	p53 CDE Neutral		B3GALT4	CTCACCCTAAAGACCCTCAG	48	278.721	p53 CDE Neutral		B3GALT4	CTCACCCTAAAGACCCTCAG	170	621.941	p53 CDE Neutral		B3GALT4	CTCACCCTAAAGACCCTCAG	227	712.991	p53 CDE Neutral
B3GALT4	GACGATCACCAGCAGCAAAG	33	169.161	p53 CDE Neutral		B3GALT4	GACGATCACCAGCAGCAAAG	59	226.294	p53 CDE Neutral		B3GALT4	GACGATCACCAGCAGCAAAG	47	131.207	p53 CDE Neutral		B3GALT4	GACGATCACCAGCAGCAAAG	22	88.1205	p53 CDE Neutral		B3GALT4	GACGATCACCAGCAGCAAAG	107	290.079	p53 CDE Neutral		B3GALT4	GACGATCACCAGCAGCAAAG	39	226.461	p53 CDE Neutral		B3GALT4	GACGATCACCAGCAGCAAAG	3	10.9754	p53 CDE Neutral		B3GALT4	GACGATCACCAGCAGCAAAG	7	21.9865	p53 CDE Neutral
B3GALT4	GGCCCGATACGTCCTCAAGA	0	0	p53 CDE Neutral		B3GALT4	GGCCCGATACGTCCTCAAGA	0	0	p53 CDE Neutral		B3GALT4	GGCCCGATACGTCCTCAAGA	0	0	p53 CDE Neutral		B3GALT4	GGCCCGATACGTCCTCAAGA	0	0	p53 CDE Neutral		B3GALT4	GGCCCGATACGTCCTCAAGA	0	0	p53 CDE Neutral		B3GALT4	GGCCCGATACGTCCTCAAGA	0	0	p53 CDE Neutral		B3GALT4	GGCCCGATACGTCCTCAAGA	0	0	p53 CDE Neutral		B3GALT4	GGCCCGATACGTCCTCAAGA	0	0	p53 CDE Neutral
B3GALT4	GGCCCGATACGTCCTCAAGA	0	0	p53 CDE Neutral		B3GALT4	GGCCCGATACGTCCTCAAGA	0	0	p53 CDE Neutral		B3GALT4	GGCCCGATACGTCCTCAAGA	0	0	p53 CDE Neutral		B3GALT4	GGCCCGATACGTCCTCAAGA	0	0	p53 CDE Neutral		B3GALT4	GGCCCGATACGTCCTCAAGA	0	0	p53 CDE Neutral		B3GALT4	GGCCCGATACGTCCTCAAGA	0	0	p53 CDE Neutral		B3GALT4	GGCCCGATACGTCCTCAAGA	0	0	p53 CDE Neutral		B3GALT4	GGCCCGATACGTCCTCAAGA	0	0	p53 CDE Neutral
B3GALT4	GTGGGGGTAAGTGCCCGACG	43	220.422	p53 CDE Neutral		B3GALT4	GTGGGGGTAAGTGCCCGACG	43	164.926	p53 CDE Neutral		B3GALT4	GTGGGGGTAAGTGCCCGACG	32	89.3326	p53 CDE Neutral		B3GALT4	GTGGGGGTAAGTGCCCGACG	28	112.153	p53 CDE Neutral		B3GALT4	GTGGGGGTAAGTGCCCGACG	44	119.285	p53 CDE Neutral		B3GALT4	GTGGGGGTAAGTGCCCGACG	19	110.327	p53 CDE Neutral		B3GALT4	GTGGGGGTAAGTGCCCGACG	2	7.31695	p53 CDE Neutral		B3GALT4	GTGGGGGTAAGTGCCCGACG	7	21.9865	p53 CDE Neutral
B3GALT4	TCCCAGCCCCCGCCTCACCG	3	15.3783	p53 CDE Neutral		B3GALT4	TCCCAGCCCCCGCCTCACCG	25	95.8872	p53 CDE Neutral		B3GALT4	TCCCAGCCCCCGCCTCACCG	10	27.9164	p53 CDE Neutral		B3GALT4	TCCCAGCCCCCGCCTCACCG	2	8.01096	p53 CDE Neutral		B3GALT4	TCCCAGCCCCCGCCTCACCG	46	124.707	p53 CDE Neutral		B3GALT4	TCCCAGCCCCCGCCTCACCG	12	69.6803	p53 CDE Neutral		B3GALT4	TCCCAGCCCCCGCCTCACCG	1	3.65847	p53 CDE Neutral		B3GALT4	TCCCAGCCCCCGCCTCACCG	40	125.637	p53 CDE Neutral
B3GALT4	TGAACCAGAGAAACGCCATT	12	61.5132	p53 CDE Neutral		B3GALT4	TGAACCAGAGAAACGCCATT	22	84.3807	p53 CDE Neutral		B3GALT4	TGAACCAGAGAAACGCCATT	42	117.249	p53 CDE Neutral		B3GALT4	TGAACCAGAGAAACGCCATT	15	60.0822	p53 CDE Neutral		B3GALT4	TGAACCAGAGAAACGCCATT	38	103.019	p53 CDE Neutral		B3GALT4	TGAACCAGAGAAACGCCATT	22	127.747	p53 CDE Neutral		B3GALT4	TGAACCAGAGAAACGCCATT	724	2648.74	p53 CDE Neutral		B3GALT4	TGAACCAGAGAAACGCCATT	183	574.79	p53 CDE Neutral
BAZ1B	ACCTCAGCATCATCCACAGG	39	199.918	p53 CDE Pos		BAZ1B	ACCTCAGCATCATCCACAGG	36	138.078	p53 CDE Pos		BAZ1B	ACCTCAGCATCATCCACAGG	88	245.665	p53 CDE Pos		BAZ1B	ACCTCAGCATCATCCACAGG	29	116.159	p53 CDE Pos		BAZ1B	ACCTCAGCATCATCCACAGG	96	260.258	p53 CDE Pos		BAZ1B	ACCTCAGCATCATCCACAGG	22	127.747	p53 CDE Pos		BAZ1B	ACCTCAGCATCATCCACAGG	40	146.339	p53 CDE Pos		BAZ1B	ACCTCAGCATCATCCACAGG	174	546.522	p53 CDE Pos
BAZ1B	AGAAGCCACACTCTACCAGG	100	512.61	p53 CDE Pos		BAZ1B	AGAAGCCACACTCTACCAGG	105	402.726	p53 CDE Pos		BAZ1B	AGAAGCCACACTCTACCAGG	61	170.29	p53 CDE Pos		BAZ1B	AGAAGCCACACTCTACCAGG	19	76.1041	p53 CDE Pos		BAZ1B	AGAAGCCACACTCTACCAGG	104	281.946	p53 CDE Pos		BAZ1B	AGAAGCCACACTCTACCAGG	59	342.595	p53 CDE Pos		BAZ1B	AGAAGCCACACTCTACCAGG	44	160.973	p53 CDE Pos		BAZ1B	AGAAGCCACACTCTACCAGG	69	216.724	p53 CDE Pos
BAZ1B	AGCGGTACTTCACGATCTTG	30	153.783	p53 CDE Pos		BAZ1B	AGCGGTACTTCACGATCTTG	52	199.445	p53 CDE Pos		BAZ1B	AGCGGTACTTCACGATCTTG	81	226.123	p53 CDE Pos		BAZ1B	AGCGGTACTTCACGATCTTG	83	332.455	p53 CDE Pos		BAZ1B	AGCGGTACTTCACGATCTTG	92	249.414	p53 CDE Pos		BAZ1B	AGCGGTACTTCACGATCTTG	60	348.402	p53 CDE Pos		BAZ1B	AGCGGTACTTCACGATCTTG	11	40.2432	p53 CDE Pos		BAZ1B	AGCGGTACTTCACGATCTTG	24	75.3823	p53 CDE Pos
BAZ1B	GATGTTCAGGAGGAAAGCGA	35	179.414	p53 CDE Pos		BAZ1B	GATGTTCAGGAGGAAAGCGA	43	164.926	p53 CDE Pos		BAZ1B	GATGTTCAGGAGGAAAGCGA	72	200.998	p53 CDE Pos		BAZ1B	GATGTTCAGGAGGAAAGCGA	69	276.378	p53 CDE Pos		BAZ1B	GATGTTCAGGAGGAAAGCGA	72	195.193	p53 CDE Pos		BAZ1B	GATGTTCAGGAGGAAAGCGA	30	174.201	p53 CDE Pos		BAZ1B	GATGTTCAGGAGGAAAGCGA	66	241.459	p53 CDE Pos		BAZ1B	GATGTTCAGGAGGAAAGCGA	202	634.468	p53 CDE Pos
BAZ1B	GCTCACTGTACCTTTCCAAG	56	287.062	p53 CDE Pos		BAZ1B	GCTCACTGTACCTTTCCAAG	38	145.749	p53 CDE Pos		BAZ1B	GCTCACTGTACCTTTCCAAG	65	181.457	p53 CDE Pos		BAZ1B	GCTCACTGTACCTTTCCAAG	30	120.164	p53 CDE Pos		BAZ1B	GCTCACTGTACCTTTCCAAG	50	135.551	p53 CDE Pos		BAZ1B	GCTCACTGTACCTTTCCAAG	16	92.9071	p53 CDE Pos		BAZ1B	GCTCACTGTACCTTTCCAAG	25	91.4619	p53 CDE Pos		BAZ1B	GCTCACTGTACCTTTCCAAG	15	47.114	p53 CDE Pos
BAZ1B	GGTACTTCACGATCTTGTGG	122	625.384	p53 CDE Pos		BAZ1B	GGTACTTCACGATCTTGTGG	111	425.739	p53 CDE Pos		BAZ1B	GGTACTTCACGATCTTGTGG	125	348.955	p53 CDE Pos		BAZ1B	GGTACTTCACGATCTTGTGG	154	616.844	p53 CDE Pos		BAZ1B	GGTACTTCACGATCTTGTGG	166	450.029	p53 CDE Pos		BAZ1B	GGTACTTCACGATCTTGTGG	84	487.762	p53 CDE Pos		BAZ1B	GGTACTTCACGATCTTGTGG	481	1759.73	p53 CDE Pos		BAZ1B	GGTACTTCACGATCTTGTGG	255	800.937	p53 CDE Pos
BAZ1B	TCGTGAAGTACCGCTTCAGC	11	56.3871	p53 CDE Pos		BAZ1B	TCGTGAAGTACCGCTTCAGC	28	107.394	p53 CDE Pos		BAZ1B	TCGTGAAGTACCGCTTCAGC	24	66.9994	p53 CDE Pos		BAZ1B	TCGTGAAGTACCGCTTCAGC	16	64.0877	p53 CDE Pos		BAZ1B	TCGTGAAGTACCGCTTCAGC	56	151.817	p53 CDE Pos		BAZ1B	TCGTGAAGTACCGCTTCAGC	10	58.067	p53 CDE Pos		BAZ1B	TCGTGAAGTACCGCTTCAGC	148	541.454	p53 CDE Pos		BAZ1B	TCGTGAAGTACCGCTTCAGC	84	263.838	p53 CDE Pos
BAZ1B	TGAAGATTCAGCAAAAACTG	89	456.223	p53 CDE Pos		BAZ1B	TGAAGATTCAGCAAAAACTG	102	391.22	p53 CDE Pos		BAZ1B	TGAAGATTCAGCAAAAACTG	140	390.83	p53 CDE Pos		BAZ1B	TGAAGATTCAGCAAAAACTG	86	344.471	p53 CDE Pos		BAZ1B	TGAAGATTCAGCAAAAACTG	181	490.694	p53 CDE Pos		BAZ1B	TGAAGATTCAGCAAAAACTG	61	354.208	p53 CDE Pos		BAZ1B	TGAAGATTCAGCAAAAACTG	66	241.459	p53 CDE Pos		BAZ1B	TGAAGATTCAGCAAAAACTG	85	266.979	p53 CDE Pos
BAZ1B	TGAATGGACAGAAATCCACA	49	251.179	p53 CDE Pos		BAZ1B	TGAATGGACAGAAATCCACA	42	161.091	p53 CDE Pos		BAZ1B	TGAATGGACAGAAATCCACA	64	178.665	p53 CDE Pos		BAZ1B	TGAATGGACAGAAATCCACA	52	208.285	p53 CDE Pos		BAZ1B	TGAATGGACAGAAATCCACA	58	157.239	p53 CDE Pos		BAZ1B	TGAATGGACAGAAATCCACA	24	139.361	p53 CDE Pos		BAZ1B	TGAATGGACAGAAATCCACA	11	40.2432	p53 CDE Pos		BAZ1B	TGAATGGACAGAAATCCACA	4	12.5637	p53 CDE Pos
BAZ1B	TGTACCCCCAGAATTCCGTG	41	210.17	p53 CDE Pos		BAZ1B	TGTACCCCCAGAATTCCGTG	60	230.129	p53 CDE Pos		BAZ1B	TGTACCCCCAGAATTCCGTG	76	212.165	p53 CDE Pos		BAZ1B	TGTACCCCCAGAATTCCGTG	25	100.137	p53 CDE Pos		BAZ1B	TGTACCCCCAGAATTCCGTG	67	181.638	p53 CDE Pos		BAZ1B	TGTACCCCCAGAATTCCGTG	28	162.587	p53 CDE Pos		BAZ1B	TGTACCCCCAGAATTCCGTG	254	929.252	p53 CDE Pos		BAZ1B	TGTACCCCCAGAATTCCGTG	349	1096.18	p53 CDE Pos
BICC1	AAACATCTGTGTATTTGCCC	85	435.719	p53 CDE Neutral		BICC1	AAACATCTGTGTATTTGCCC	77	295.333	p53 CDE Neutral		BICC1	AAACATCTGTGTATTTGCCC	338	943.575	p53 CDE Neutral		BICC1	AAACATCTGTGTATTTGCCC	111	444.608	p53 CDE Neutral		BICC1	AAACATCTGTGTATTTGCCC	112	303.634	p53 CDE Neutral		BICC1	AAACATCTGTGTATTTGCCC	64	371.628	p53 CDE Neutral		BICC1	AAACATCTGTGTATTTGCCC	74	270.727	p53 CDE Neutral		BICC1	AAACATCTGTGTATTTGCCC	52	163.328	p53 CDE Neutral
BICC1	AACTTAAATAGCTCTTTCAA	14	71.7654	p53 CDE Neutral		BICC1	AACTTAAATAGCTCTTTCAA	50	191.774	p53 CDE Neutral		BICC1	AACTTAAATAGCTCTTTCAA	106	295.914	p53 CDE Neutral		BICC1	AACTTAAATAGCTCTTTCAA	52	208.285	p53 CDE Neutral		BICC1	AACTTAAATAGCTCTTTCAA	70	189.771	p53 CDE Neutral		BICC1	AACTTAAATAGCTCTTTCAA	31	180.008	p53 CDE Neutral		BICC1	AACTTAAATAGCTCTTTCAA	1	3.65847	p53 CDE Neutral		BICC1	AACTTAAATAGCTCTTTCAA	2	6.28186	p53 CDE Neutral
BICC1	CAAGTTTCTTCCTGTCCACG	39	199.918	p53 CDE Neutral		BICC1	CAAGTTTCTTCCTGTCCACG	32	122.736	p53 CDE Neutral		BICC1	CAAGTTTCTTCCTGTCCACG	65	181.457	p53 CDE Neutral		BICC1	CAAGTTTCTTCCTGTCCACG	84	336.46	p53 CDE Neutral		BICC1	CAAGTTTCTTCCTGTCCACG	63	170.794	p53 CDE Neutral		BICC1	CAAGTTTCTTCCTGTCCACG	36	209.041	p53 CDE Neutral		BICC1	CAAGTTTCTTCCTGTCCACG	120	439.017	p53 CDE Neutral		BICC1	CAAGTTTCTTCCTGTCCACG	162	508.831	p53 CDE Neutral
BICC1	GAATAACTACTTTTGGTGCC	0	0	p53 CDE Neutral		BICC1	GAATAACTACTTTTGGTGCC	0	0	p53 CDE Neutral		BICC1	GAATAACTACTTTTGGTGCC	0	0	p53 CDE Neutral		BICC1	GAATAACTACTTTTGGTGCC	0	0	p53 CDE Neutral		BICC1	GAATAACTACTTTTGGTGCC	0	0	p53 CDE Neutral		BICC1	GAATAACTACTTTTGGTGCC	0	0	p53 CDE Neutral		BICC1	GAATAACTACTTTTGGTGCC	0	0	p53 CDE Neutral		BICC1	GAATAACTACTTTTGGTGCC	0	0	p53 CDE Neutral
BICC1	GATCCTGATCTGTGAGAGTG	64	328.071	p53 CDE Neutral		BICC1	GATCCTGATCTGTGAGAGTG	88	337.523	p53 CDE Neutral		BICC1	GATCCTGATCTGTGAGAGTG	364	1016.16	p53 CDE Neutral		BICC1	GATCCTGATCTGTGAGAGTG	313	1253.72	p53 CDE Neutral		BICC1	GATCCTGATCTGTGAGAGTG	89	241.281	p53 CDE Neutral		BICC1	GATCCTGATCTGTGAGAGTG	59	342.595	p53 CDE Neutral		BICC1	GATCCTGATCTGTGAGAGTG	6	21.9508	p53 CDE Neutral		BICC1	GATCCTGATCTGTGAGAGTG	7	21.9865	p53 CDE Neutral
BICC1	GCTCCACTCCGGGCTGTGCA	74	379.332	p53 CDE Neutral		BICC1	GCTCCACTCCGGGCTGTGCA	117	448.752	p53 CDE Neutral		BICC1	GCTCCACTCCGGGCTGTGCA	96	267.998	p53 CDE Neutral		BICC1	GCTCCACTCCGGGCTGTGCA	49	196.268	p53 CDE Neutral		BICC1	GCTCCACTCCGGGCTGTGCA	117	317.189	p53 CDE Neutral		BICC1	GCTCCACTCCGGGCTGTGCA	66	383.242	p53 CDE Neutral		BICC1	GCTCCACTCCGGGCTGTGCA	52	190.241	p53 CDE Neutral		BICC1	GCTCCACTCCGGGCTGTGCA	34	106.792	p53 CDE Neutral
BICC1	GGGAGAGCCCGGCTACCTGG	41	210.17	p53 CDE Neutral		BICC1	GGGAGAGCCCGGCTACCTGG	43	164.926	p53 CDE Neutral		BICC1	GGGAGAGCCCGGCTACCTGG	51	142.374	p53 CDE Neutral		BICC1	GGGAGAGCCCGGCTACCTGG	30	120.164	p53 CDE Neutral		BICC1	GGGAGAGCCCGGCTACCTGG	130	352.432	p53 CDE Neutral		BICC1	GGGAGAGCCCGGCTACCTGG	42	243.881	p53 CDE Neutral		BICC1	GGGAGAGCCCGGCTACCTGG	43	157.314	p53 CDE Neutral		BICC1	GGGAGAGCCCGGCTACCTGG	166	521.394	p53 CDE Neutral
BICC1	GTGCTACTGTCATAGTACGA	57	292.188	p53 CDE Neutral		BICC1	GTGCTACTGTCATAGTACGA	74	283.826	p53 CDE Neutral		BICC1	GTGCTACTGTCATAGTACGA	90	251.248	p53 CDE Neutral		BICC1	GTGCTACTGTCATAGTACGA	22	88.1205	p53 CDE Neutral		BICC1	GTGCTACTGTCATAGTACGA	84	227.726	p53 CDE Neutral		BICC1	GTGCTACTGTCATAGTACGA	35	203.234	p53 CDE Neutral		BICC1	GTGCTACTGTCATAGTACGA	25	91.4619	p53 CDE Neutral		BICC1	GTGCTACTGTCATAGTACGA	11	34.5502	p53 CDE Neutral
BICC1	GTTTGCTGAAGAGCTCAGGG	31	158.909	p53 CDE Neutral		BICC1	GTTTGCTGAAGAGCTCAGGG	38	145.749	p53 CDE Neutral		BICC1	GTTTGCTGAAGAGCTCAGGG	50	139.582	p53 CDE Neutral		BICC1	GTTTGCTGAAGAGCTCAGGG	15	60.0822	p53 CDE Neutral		BICC1	GTTTGCTGAAGAGCTCAGGG	43	116.574	p53 CDE Neutral		BICC1	GTTTGCTGAAGAGCTCAGGG	26	150.974	p53 CDE Neutral		BICC1	GTTTGCTGAAGAGCTCAGGG	13	47.5602	p53 CDE Neutral		BICC1	GTTTGCTGAAGAGCTCAGGG	16	50.2549	p53 CDE Neutral
BICC1	TCTCACAGATCAGGATCTGA	0	0	p53 CDE Neutral		BICC1	TCTCACAGATCAGGATCTGA	0	0	p53 CDE Neutral		BICC1	TCTCACAGATCAGGATCTGA	0	0	p53 CDE Neutral		BICC1	TCTCACAGATCAGGATCTGA	0	0	p53 CDE Neutral		BICC1	TCTCACAGATCAGGATCTGA	2	5.42204	p53 CDE Neutral		BICC1	TCTCACAGATCAGGATCTGA	1	5.8067	p53 CDE Neutral		BICC1	TCTCACAGATCAGGATCTGA	0	0	p53 CDE Neutral		BICC1	TCTCACAGATCAGGATCTGA	0	0	p53 CDE Neutral
BRIP1	AAATGTTTCAGTATTCTGGA	54	276.81	p53 CDE Pos		BRIP1	AAATGTTTCAGTATTCTGGA	46	176.432	p53 CDE Pos		BRIP1	AAATGTTTCAGTATTCTGGA	48	133.999	p53 CDE Pos		BRIP1	AAATGTTTCAGTATTCTGGA	51	204.279	p53 CDE Pos		BRIP1	AAATGTTTCAGTATTCTGGA	103	279.235	p53 CDE Pos		BRIP1	AAATGTTTCAGTATTCTGGA	31	180.008	p53 CDE Pos		BRIP1	AAATGTTTCAGTATTCTGGA	0	0	p53 CDE Pos		BRIP1	AAATGTTTCAGTATTCTGGA	9	28.2684	p53 CDE Pos
BRIP1	AGATTACTAGAGAGCTCCGG	22	112.774	p53 CDE Pos		BRIP1	AGATTACTAGAGAGCTCCGG	20	76.7098	p53 CDE Pos		BRIP1	AGATTACTAGAGAGCTCCGG	13	36.2914	p53 CDE Pos		BRIP1	AGATTACTAGAGAGCTCCGG	1	4.00548	p53 CDE Pos		BRIP1	AGATTACTAGAGAGCTCCGG	41	111.152	p53 CDE Pos		BRIP1	AGATTACTAGAGAGCTCCGG	21	121.941	p53 CDE Pos		BRIP1	AGATTACTAGAGAGCTCCGG	5	18.2924	p53 CDE Pos		BRIP1	AGATTACTAGAGAGCTCCGG	0	0	p53 CDE Pos
BRIP1	CTACAGCACACAGCTCGTAG	71	363.953	p53 CDE Pos		BRIP1	CTACAGCACACAGCTCGTAG	82	314.51	p53 CDE Pos		BRIP1	CTACAGCACACAGCTCGTAG	81	226.123	p53 CDE Pos		BRIP1	CTACAGCACACAGCTCGTAG	102	408.559	p53 CDE Pos		BRIP1	CTACAGCACACAGCTCGTAG	109	295.501	p53 CDE Pos		BRIP1	CTACAGCACACAGCTCGTAG	58	336.788	p53 CDE Pos		BRIP1	CTACAGCACACAGCTCGTAG	67	245.118	p53 CDE Pos		BRIP1	CTACAGCACACAGCTCGTAG	72	226.147	p53 CDE Pos
BRIP1	GACCACCATTCAAAATTGAG	75	384.458	p53 CDE Pos		BRIP1	GACCACCATTCAAAATTGAG	116	444.917	p53 CDE Pos		BRIP1	GACCACCATTCAAAATTGAG	91	254.04	p53 CDE Pos		BRIP1	GACCACCATTCAAAATTGAG	92	368.504	p53 CDE Pos		BRIP1	GACCACCATTCAAAATTGAG	162	439.185	p53 CDE Pos		BRIP1	GACCACCATTCAAAATTGAG	45	261.301	p53 CDE Pos		BRIP1	GACCACCATTCAAAATTGAG	77	281.703	p53 CDE Pos		BRIP1	GACCACCATTCAAAATTGAG	132	414.603	p53 CDE Pos
BRIP1	GTCATTGTAGAACCACAGGG	36	184.54	p53 CDE Pos		BRIP1	GTCATTGTAGAACCACAGGG	79	303.004	p53 CDE Pos		BRIP1	GTCATTGTAGAACCACAGGG	33	92.1242	p53 CDE Pos		BRIP1	GTCATTGTAGAACCACAGGG	66	264.362	p53 CDE Pos		BRIP1	GTCATTGTAGAACCACAGGG	71	192.482	p53 CDE Pos		BRIP1	GTCATTGTAGAACCACAGGG	23	133.554	p53 CDE Pos		BRIP1	GTCATTGTAGAACCACAGGG	14	51.2186	p53 CDE Pos		BRIP1	GTCATTGTAGAACCACAGGG	8	25.1274	p53 CDE Pos
BRIP1	GTCTTCTACCTGGCCGTCAG	42	215.296	p53 CDE Pos		BRIP1	GTCTTCTACCTGGCCGTCAG	18	69.0388	p53 CDE Pos		BRIP1	GTCTTCTACCTGGCCGTCAG	42	117.249	p53 CDE Pos		BRIP1	GTCTTCTACCTGGCCGTCAG	43	172.236	p53 CDE Pos		BRIP1	GTCTTCTACCTGGCCGTCAG	48	130.129	p53 CDE Pos		BRIP1	GTCTTCTACCTGGCCGTCAG	28	162.587	p53 CDE Pos		BRIP1	GTCTTCTACCTGGCCGTCAG	26	95.1203	p53 CDE Pos		BRIP1	GTCTTCTACCTGGCCGTCAG	5	15.7047	p53 CDE Pos
BRIP1	TATGACGCAATCAAATACAA	89	456.223	p53 CDE Pos		BRIP1	TATGACGCAATCAAATACAA	153	586.83	p53 CDE Pos		BRIP1	TATGACGCAATCAAATACAA	182	508.079	p53 CDE Pos		BRIP1	TATGACGCAATCAAATACAA	108	432.592	p53 CDE Pos		BRIP1	TATGACGCAATCAAATACAA	167	452.74	p53 CDE Pos		BRIP1	TATGACGCAATCAAATACAA	118	685.19	p53 CDE Pos		BRIP1	TATGACGCAATCAAATACAA	29	106.096	p53 CDE Pos		BRIP1	TATGACGCAATCAAATACAA	38	119.355	p53 CDE Pos
BRIP1	TGTTTGTTGGAGAGTCCCAC	23	117.9	p53 CDE Pos		BRIP1	TGTTTGTTGGAGAGTCCCAC	44	168.761	p53 CDE Pos		BRIP1	TGTTTGTTGGAGAGTCCCAC	56	156.332	p53 CDE Pos		BRIP1	TGTTTGTTGGAGAGTCCCAC	27	108.148	p53 CDE Pos		BRIP1	TGTTTGTTGGAGAGTCCCAC	76	206.037	p53 CDE Pos		BRIP1	TGTTTGTTGGAGAGTCCCAC	12	69.6803	p53 CDE Pos		BRIP1	TGTTTGTTGGAGAGTCCCAC	14	51.2186	p53 CDE Pos		BRIP1	TGTTTGTTGGAGAGTCCCAC	11	34.5502	p53 CDE Pos
BRIP1	TTGTCGTGGTAAAGTGAGTG	42	215.296	p53 CDE Pos		BRIP1	TTGTCGTGGTAAAGTGAGTG	114	437.246	p53 CDE Pos		BRIP1	TTGTCGTGGTAAAGTGAGTG	44	122.832	p53 CDE Pos		BRIP1	TTGTCGTGGTAAAGTGAGTG	77	308.422	p53 CDE Pos		BRIP1	TTGTCGTGGTAAAGTGAGTG	80	216.882	p53 CDE Pos		BRIP1	TTGTCGTGGTAAAGTGAGTG	47	272.915	p53 CDE Pos		BRIP1	TTGTCGTGGTAAAGTGAGTG	189	691.452	p53 CDE Pos		BRIP1	TTGTCGTGGTAAAGTGAGTG	304	954.843	p53 CDE Pos
BRIP1	TTTCCTTTCTTACAGCCCCC	33	169.161	p53 CDE Pos		BRIP1	TTTCCTTTCTTACAGCCCCC	26	99.7227	p53 CDE Pos		BRIP1	TTTCCTTTCTTACAGCCCCC	79	220.54	p53 CDE Pos		BRIP1	TTTCCTTTCTTACAGCCCCC	52	208.285	p53 CDE Pos		BRIP1	TTTCCTTTCTTACAGCCCCC	93	252.125	p53 CDE Pos		BRIP1	TTTCCTTTCTTACAGCCCCC	21	121.941	p53 CDE Pos		BRIP1	TTTCCTTTCTTACAGCCCCC	4	14.6339	p53 CDE Pos		BRIP1	TTTCCTTTCTTACAGCCCCC	8	25.1274	p53 CDE Pos
BZW1	ATGGATAACAGACTGATGGT	43	220.422	p53 CDE Neutral		BZW1	ATGGATAACAGACTGATGGT	46	176.432	p53 CDE Neutral		BZW1	ATGGATAACAGACTGATGGT	62	173.082	p53 CDE Neutral		BZW1	ATGGATAACAGACTGATGGT	23	92.126	p53 CDE Neutral		BZW1	ATGGATAACAGACTGATGGT	47	127.418	p53 CDE Neutral		BZW1	ATGGATAACAGACTGATGGT	36	209.041	p53 CDE Neutral		BZW1	ATGGATAACAGACTGATGGT	0	0	p53 CDE Neutral		BZW1	ATGGATAACAGACTGATGGT	22	69.1005	p53 CDE Neutral
BZW1	AGAGTGTTTCTGCATATCGA	20	102.522	p53 CDE Neutral		BZW1	AGAGTGTTTCTGCATATCGA	26	99.7227	p53 CDE Neutral		BZW1	AGAGTGTTTCTGCATATCGA	113	315.456	p53 CDE Neutral		BZW1	AGAGTGTTTCTGCATATCGA	31	124.17	p53 CDE Neutral		BZW1	AGAGTGTTTCTGCATATCGA	23	62.3534	p53 CDE Neutral		BZW1	AGAGTGTTTCTGCATATCGA	21	121.941	p53 CDE Neutral		BZW1	AGAGTGTTTCTGCATATCGA	1	3.65847	p53 CDE Neutral		BZW1	AGAGTGTTTCTGCATATCGA	25	78.5233	p53 CDE Neutral
BZW1	TATCCAACTTTAGCCCCAGG	56	287.062	p53 CDE Neutral		BZW1	TATCCAACTTTAGCCCCAGG	76	291.497	p53 CDE Neutral		BZW1	TATCCAACTTTAGCCCCAGG	56	156.332	p53 CDE Neutral		BZW1	TATCCAACTTTAGCCCCAGG	22	88.1205	p53 CDE Neutral		BZW1	TATCCAACTTTAGCCCCAGG	82	222.304	p53 CDE Neutral		BZW1	TATCCAACTTTAGCCCCAGG	34	197.428	p53 CDE Neutral		BZW1	TATCCAACTTTAGCCCCAGG	53	193.899	p53 CDE Neutral		BZW1	TATCCAACTTTAGCCCCAGG	26	81.6642	p53 CDE Neutral
BZW1	CATCCTTAAATGGATCACCA	5	25.6305	p53 CDE Neutral		BZW1	CATCCTTAAATGGATCACCA	40	153.42	p53 CDE Neutral		BZW1	CATCCTTAAATGGATCACCA	23	64.2078	p53 CDE Neutral		BZW1	CATCCTTAAATGGATCACCA	18	72.0986	p53 CDE Neutral		BZW1	CATCCTTAAATGGATCACCA	42	113.863	p53 CDE Neutral		BZW1	CATCCTTAAATGGATCACCA	31	180.008	p53 CDE Neutral		BZW1	CATCCTTAAATGGATCACCA	5	18.2924	p53 CDE Neutral		BZW1	CATCCTTAAATGGATCACCA	14	43.973	p53 CDE Neutral
BZW1	AATCAGGCGCTACAAATACC	26	133.279	p53 CDE Neutral		BZW1	AATCAGGCGCTACAAATACC	35	134.242	p53 CDE Neutral		BZW1	AATCAGGCGCTACAAATACC	72	200.998	p53 CDE Neutral		BZW1	AATCAGGCGCTACAAATACC	80	320.438	p53 CDE Neutral		BZW1	AATCAGGCGCTACAAATACC	44	119.285	p53 CDE Neutral		BZW1	AATCAGGCGCTACAAATACC	28	162.587	p53 CDE Neutral		BZW1	AATCAGGCGCTACAAATACC	63	230.484	p53 CDE Neutral		BZW1	AATCAGGCGCTACAAATACC	53	166.469	p53 CDE Neutral
BZW1	TCCCCCCAGATGAAAAAGAG	75	384.458	p53 CDE Neutral		BZW1	TCCCCCCAGATGAAAAAGAG	120	460.259	p53 CDE Neutral		BZW1	TCCCCCCAGATGAAAAAGAG	161	449.455	p53 CDE Neutral		BZW1	TCCCCCCAGATGAAAAAGAG	167	668.915	p53 CDE Neutral		BZW1	TCCCCCCAGATGAAAAAGAG	183	496.116	p53 CDE Neutral		BZW1	TCCCCCCAGATGAAAAAGAG	86	499.376	p53 CDE Neutral		BZW1	TCCCCCCAGATGAAAAAGAG	57	208.533	p53 CDE Neutral		BZW1	TCCCCCCAGATGAAAAAGAG	62	194.738	p53 CDE Neutral
BZW1	CATGGTCTCTAGATCTTCTT	84	430.593	p53 CDE Neutral		BZW1	CATGGTCTCTAGATCTTCTT	70	268.484	p53 CDE Neutral		BZW1	CATGGTCTCTAGATCTTCTT	106	295.914	p53 CDE Neutral		BZW1	CATGGTCTCTAGATCTTCTT	50	200.274	p53 CDE Neutral		BZW1	CATGGTCTCTAGATCTTCTT	136	368.699	p53 CDE Neutral		BZW1	CATGGTCTCTAGATCTTCTT	55	319.368	p53 CDE Neutral		BZW1	CATGGTCTCTAGATCTTCTT	13	47.5602	p53 CDE Neutral		BZW1	CATGGTCTCTAGATCTTCTT	30	94.2279	p53 CDE Neutral
BZW1	AACAAGCTAGCTATGTTGAC	25	128.153	p53 CDE Neutral		BZW1	AACAAGCTAGCTATGTTGAC	21	80.5453	p53 CDE Neutral		BZW1	AACAAGCTAGCTATGTTGAC	23	64.2078	p53 CDE Neutral		BZW1	AACAAGCTAGCTATGTTGAC	14	56.0767	p53 CDE Neutral		BZW1	AACAAGCTAGCTATGTTGAC	50	135.551	p53 CDE Neutral		BZW1	AACAAGCTAGCTATGTTGAC	7	40.6469	p53 CDE Neutral		BZW1	AACAAGCTAGCTATGTTGAC	3	10.9754	p53 CDE Neutral		BZW1	AACAAGCTAGCTATGTTGAC	20	62.8186	p53 CDE Neutral
BZW1	AATGAAAATTTGGTTAAAGA	18	92.2698	p53 CDE Neutral		BZW1	AATGAAAATTTGGTTAAAGA	92	352.865	p53 CDE Neutral		BZW1	AATGAAAATTTGGTTAAAGA	119	332.206	p53 CDE Neutral		BZW1	AATGAAAATTTGGTTAAAGA	130	520.712	p53 CDE Neutral		BZW1	AATGAAAATTTGGTTAAAGA	38	103.019	p53 CDE Neutral		BZW1	AATGAAAATTTGGTTAAAGA	14	81.2937	p53 CDE Neutral		BZW1	AATGAAAATTTGGTTAAAGA	4	14.6339	p53 CDE Neutral		BZW1	AATGAAAATTTGGTTAAAGA	5	15.7047	p53 CDE Neutral
BZW1	AAGAGCTTTCAGAATATGTT	61	312.692	p53 CDE Neutral		BZW1	AAGAGCTTTCAGAATATGTT	101	387.384	p53 CDE Neutral		BZW1	AAGAGCTTTCAGAATATGTT	60	167.499	p53 CDE Neutral		BZW1	AAGAGCTTTCAGAATATGTT	81	324.444	p53 CDE Neutral		BZW1	AAGAGCTTTCAGAATATGTT	112	303.634	p53 CDE Neutral		BZW1	AAGAGCTTTCAGAATATGTT	58	336.788	p53 CDE Neutral		BZW1	AAGAGCTTTCAGAATATGTT	49	179.265	p53 CDE Neutral		BZW1	AAGAGCTTTCAGAATATGTT	40	125.637	p53 CDE Neutral
C10orf120	CAAGGGGGAGTATTTCCCAA	54	276.81	p53 CDE Neg		C10orf120	CAAGGGGGAGTATTTCCCAA	86	329.852	p53 CDE Neg		C10orf120	CAAGGGGGAGTATTTCCCAA	92	256.831	p53 CDE Neg		C10orf120	CAAGGGGGAGTATTTCCCAA	123	492.674	p53 CDE Neg		C10orf120	CAAGGGGGAGTATTTCCCAA	124	336.166	p53 CDE Neg		C10orf120	CAAGGGGGAGTATTTCCCAA	53	307.755	p53 CDE Neg		C10orf120	CAAGGGGGAGTATTTCCCAA	155	567.063	p53 CDE Neg		C10orf120	CAAGGGGGAGTATTTCCCAA	137	430.307	p53 CDE Neg
C10orf120	GCAAGTCAGACTCACCGCAA	24	123.026	p53 CDE Neg		C10orf120	GCAAGTCAGACTCACCGCAA	25	95.8872	p53 CDE Neg		C10orf120	GCAAGTCAGACTCACCGCAA	29	80.9576	p53 CDE Neg		C10orf120	GCAAGTCAGACTCACCGCAA	6	24.0329	p53 CDE Neg		C10orf120	GCAAGTCAGACTCACCGCAA	48	130.129	p53 CDE Neg		C10orf120	GCAAGTCAGACTCACCGCAA	17	98.7138	p53 CDE Neg		C10orf120	GCAAGTCAGACTCACCGCAA	13	47.5602	p53 CDE Neg		C10orf120	GCAAGTCAGACTCACCGCAA	4	12.5637	p53 CDE Neg
C10orf120	GCCGGAGTATGATCAGAGAA	25	128.153	p53 CDE Neg		C10orf120	GCCGGAGTATGATCAGAGAA	24	92.0517	p53 CDE Neg		C10orf120	GCCGGAGTATGATCAGAGAA	38	106.082	p53 CDE Neg		C10orf120	GCCGGAGTATGATCAGAGAA	9	36.0493	p53 CDE Neg		C10orf120	GCCGGAGTATGATCAGAGAA	28	75.9085	p53 CDE Neg		C10orf120	GCCGGAGTATGATCAGAGAA	13	75.487	p53 CDE Neg		C10orf120	GCCGGAGTATGATCAGAGAA	11	40.2432	p53 CDE Neg		C10orf120	GCCGGAGTATGATCAGAGAA	6	18.8456	p53 CDE Neg
C10orf120	AATTCTACAGATCAGACCCA	41	210.17	p53 CDE Neg		C10orf120	AATTCTACAGATCAGACCCA	50	191.774	p53 CDE Neg		C10orf120	AATTCTACAGATCAGACCCA	155	432.705	p53 CDE Neg		C10orf120	AATTCTACAGATCAGACCCA	71	284.389	p53 CDE Neg		C10orf120	AATTCTACAGATCAGACCCA	57	154.528	p53 CDE Neg		C10orf120	AATTCTACAGATCAGACCCA	13	75.487	p53 CDE Neg		C10orf120	AATTCTACAGATCAGACCCA	25	91.4619	p53 CDE Neg		C10orf120	AATTCTACAGATCAGACCCA	13	40.8321	p53 CDE Neg
C10orf120	AGGGGTACACAAATAGCACA	76	389.584	p53 CDE Neg		C10orf120	AGGGGTACACAAATAGCACA	75	287.662	p53 CDE Neg		C10orf120	AGGGGTACACAAATAGCACA	172	480.163	p53 CDE Neg		C10orf120	AGGGGTACACAAATAGCACA	35	140.192	p53 CDE Neg		C10orf120	AGGGGTACACAAATAGCACA	99	268.391	p53 CDE Neg		C10orf120	AGGGGTACACAAATAGCACA	36	209.041	p53 CDE Neg		C10orf120	AGGGGTACACAAATAGCACA	14	51.2186	p53 CDE Neg		C10orf120	AGGGGTACACAAATAGCACA	6	18.8456	p53 CDE Neg
C10orf120	ACGTTCACCTGCTCTCGTTG	77	394.71	p53 CDE Neg		C10orf120	ACGTTCACCTGCTCTCGTTG	91	349.029	p53 CDE Neg		C10orf120	ACGTTCACCTGCTCTCGTTG	132	368.497	p53 CDE Neg		C10orf120	ACGTTCACCTGCTCTCGTTG	37	148.203	p53 CDE Neg		C10orf120	ACGTTCACCTGCTCTCGTTG	89	241.281	p53 CDE Neg		C10orf120	ACGTTCACCTGCTCTCGTTG	35	203.234	p53 CDE Neg		C10orf120	ACGTTCACCTGCTCTCGTTG	10	36.5847	p53 CDE Neg		C10orf120	ACGTTCACCTGCTCTCGTTG	162	508.831	p53 CDE Neg
C10orf120	TTCACACCATAGCAGCAAGA	36	184.54	p53 CDE Neg		C10orf120	TTCACACCATAGCAGCAAGA	91	349.029	p53 CDE Neg		C10orf120	TTCACACCATAGCAGCAAGA	89	248.456	p53 CDE Neg		C10orf120	TTCACACCATAGCAGCAAGA	86	344.471	p53 CDE Neg		C10orf120	TTCACACCATAGCAGCAAGA	85	230.437	p53 CDE Neg		C10orf120	TTCACACCATAGCAGCAAGA	39	226.461	p53 CDE Neg		C10orf120	TTCACACCATAGCAGCAAGA	0	0	p53 CDE Neg		C10orf120	TTCACACCATAGCAGCAAGA	35	109.933	p53 CDE Neg
C10orf120	AGATCCTCTTGGCAACACGT	59	302.44	p53 CDE Neg		C10orf120	AGATCCTCTTGGCAACACGT	61	233.965	p53 CDE Neg		C10orf120	AGATCCTCTTGGCAACACGT	38	106.082	p53 CDE Neg		C10orf120	AGATCCTCTTGGCAACACGT	62	248.34	p53 CDE Neg		C10orf120	AGATCCTCTTGGCAACACGT	51	138.262	p53 CDE Neg		C10orf120	AGATCCTCTTGGCAACACGT	53	307.755	p53 CDE Neg		C10orf120	AGATCCTCTTGGCAACACGT	229	837.791	p53 CDE Neg		C10orf120	AGATCCTCTTGGCAACACGT	735	2308.58	p53 CDE Neg
C10orf120	GCGTGTAAACCTTTCAATGT	15	76.8915	p53 CDE Neg		C10orf120	GCGTGTAAACCTTTCAATGT	42	161.091	p53 CDE Neg		C10orf120	GCGTGTAAACCTTTCAATGT	72	200.998	p53 CDE Neg		C10orf120	GCGTGTAAACCTTTCAATGT	56	224.307	p53 CDE Neg		C10orf120	GCGTGTAAACCTTTCAATGT	73	197.904	p53 CDE Neg		C10orf120	GCGTGTAAACCTTTCAATGT	26	150.974	p53 CDE Neg		C10orf120	GCGTGTAAACCTTTCAATGT	89	325.604	p53 CDE Neg		C10orf120	GCGTGTAAACCTTTCAATGT	126	395.757	p53 CDE Neg
C10orf120	TCAGAGGATTGAAAAACAGA	18	92.2698	p53 CDE Neg		C10orf120	TCAGAGGATTGAAAAACAGA	26	99.7227	p53 CDE Neg		C10orf120	TCAGAGGATTGAAAAACAGA	35	97.7075	p53 CDE Neg		C10orf120	TCAGAGGATTGAAAAACAGA	57	228.312	p53 CDE Neg		C10orf120	TCAGAGGATTGAAAAACAGA	42	113.863	p53 CDE Neg		C10orf120	TCAGAGGATTGAAAAACAGA	35	203.234	p53 CDE Neg		C10orf120	TCAGAGGATTGAAAAACAGA	22	80.4864	p53 CDE Neg		C10orf120	TCAGAGGATTGAAAAACAGA	54	169.61	p53 CDE Neg
C1QL2	AAGTTCAGCTGCCAGGTACG	109	558.745	p53 CDE Neg		C1QL2	AAGTTCAGCTGCCAGGTACG	144	552.31	p53 CDE Neg		C1QL2	AAGTTCAGCTGCCAGGTACG	130	362.914	p53 CDE Neg		C1QL2	AAGTTCAGCTGCCAGGTACG	135	540.74	p53 CDE Neg		C1QL2	AAGTTCAGCTGCCAGGTACG	173	469.006	p53 CDE Neg		C1QL2	AAGTTCAGCTGCCAGGTACG	93	540.023	p53 CDE Neg		C1QL2	AAGTTCAGCTGCCAGGTACG	106	387.798	p53 CDE Neg		C1QL2	AAGTTCAGCTGCCAGGTACG	152	477.421	p53 CDE Neg
C1QL2	AGTCGCCCTTCTCTCCCGGA	16	82.0176	p53 CDE Neg		C1QL2	AGTCGCCCTTCTCTCCCGGA	17	65.2033	p53 CDE Neg		C1QL2	AGTCGCCCTTCTCTCCCGGA	29	80.9576	p53 CDE Neg		C1QL2	AGTCGCCCTTCTCTCCCGGA	39	156.214	p53 CDE Neg		C1QL2	AGTCGCCCTTCTCTCCCGGA	24	65.0645	p53 CDE Neg		C1QL2	AGTCGCCCTTCTCTCCCGGA	18	104.521	p53 CDE Neg		C1QL2	AGTCGCCCTTCTCTCCCGGA	6	21.9508	p53 CDE Neg		C1QL2	AGTCGCCCTTCTCTCCCGGA	3	9.42279	p53 CDE Neg
C1QL2	CAATCACTATGACCCCACCA	19	97.3959	p53 CDE Neg		C1QL2	CAATCACTATGACCCCACCA	59	226.294	p53 CDE Neg		C1QL2	CAATCACTATGACCCCACCA	9	25.1248	p53 CDE Neg		C1QL2	CAATCACTATGACCCCACCA	18	72.0986	p53 CDE Neg		C1QL2	CAATCACTATGACCCCACCA	47	127.418	p53 CDE Neg		C1QL2	CAATCACTATGACCCCACCA	7	40.6469	p53 CDE Neg		C1QL2	CAATCACTATGACCCCACCA	21	76.828	p53 CDE Neg		C1QL2	CAATCACTATGACCCCACCA	3	9.42279	p53 CDE Neg
C1QL2	CCTTTCATCCAGGGACCCAA	27	138.405	p53 CDE Neg		C1QL2	CCTTTCATCCAGGGACCCAA	57	218.623	p53 CDE Neg		C1QL2	CCTTTCATCCAGGGACCCAA	117	326.622	p53 CDE Neg		C1QL2	CCTTTCATCCAGGGACCCAA	87	348.477	p53 CDE Neg		C1QL2	CCTTTCATCCAGGGACCCAA	95	257.547	p53 CDE Neg		C1QL2	CCTTTCATCCAGGGACCCAA	41	238.074	p53 CDE Neg		C1QL2	CCTTTCATCCAGGGACCCAA	6	21.9508	p53 CDE Neg		C1QL2	CCTTTCATCCAGGGACCCAA	22	69.1005	p53 CDE Neg
C1QL2	CTGGCAGCTGAACTTGCCCG	59	302.44	p53 CDE Neg		C1QL2	CTGGCAGCTGAACTTGCCCG	96	368.207	p53 CDE Neg		C1QL2	CTGGCAGCTGAACTTGCCCG	98	273.581	p53 CDE Neg		C1QL2	CTGGCAGCTGAACTTGCCCG	39	156.214	p53 CDE Neg		C1QL2	CTGGCAGCTGAACTTGCCCG	102	276.524	p53 CDE Neg		C1QL2	CTGGCAGCTGAACTTGCCCG	53	307.755	p53 CDE Neg		C1QL2	CTGGCAGCTGAACTTGCCCG	0	0	p53 CDE Neg		C1QL2	CTGGCAGCTGAACTTGCCCG	3	9.42279	p53 CDE Neg
C1QL2	GAAGTGTATGTGAAGCTGGA	74	379.332	p53 CDE Neg		C1QL2	GAAGTGTATGTGAAGCTGGA	92	352.865	p53 CDE Neg		C1QL2	GAAGTGTATGTGAAGCTGGA	117	326.622	p53 CDE Neg		C1QL2	GAAGTGTATGTGAAGCTGGA	57	228.312	p53 CDE Neg		C1QL2	GAAGTGTATGTGAAGCTGGA	176	477.139	p53 CDE Neg		C1QL2	GAAGTGTATGTGAAGCTGGA	76	441.309	p53 CDE Neg		C1QL2	GAAGTGTATGTGAAGCTGGA	645	2359.72	p53 CDE Neg		C1QL2	GAAGTGTATGTGAAGCTGGA	200	628.186	p53 CDE Neg
C1QL2	GCCCATCATCTCATAGTGCG	80	410.088	p53 CDE Neg		C1QL2	GCCCATCATCTCATAGTGCG	77	295.333	p53 CDE Neg		C1QL2	GCCCATCATCTCATAGTGCG	121	337.789	p53 CDE Neg		C1QL2	GCCCATCATCTCATAGTGCG	35	140.192	p53 CDE Neg		C1QL2	GCCCATCATCTCATAGTGCG	104	281.946	p53 CDE Neg		C1QL2	GCCCATCATCTCATAGTGCG	55	319.368	p53 CDE Neg		C1QL2	GCCCATCATCTCATAGTGCG	70	256.093	p53 CDE Neg		C1QL2	GCCCATCATCTCATAGTGCG	184	577.931	p53 CDE Neg
C1QL2	GTGTATGTGAAGCTGGATGG	57	292.188	p53 CDE Neg		C1QL2	GTGTATGTGAAGCTGGATGG	84	322.181	p53 CDE Neg		C1QL2	GTGTATGTGAAGCTGGATGG	466	1300.91	p53 CDE Neg		C1QL2	GTGTATGTGAAGCTGGATGG	129	516.707	p53 CDE Neg		C1QL2	GTGTATGTGAAGCTGGATGG	131	355.143	p53 CDE Neg		C1QL2	GTGTATGTGAAGCTGGATGG	58	336.788	p53 CDE Neg		C1QL2	GTGTATGTGAAGCTGGATGG	135	493.894	p53 CDE Neg		C1QL2	GTGTATGTGAAGCTGGATGG	143	449.153	p53 CDE Neg
C1QL2	TGTGAAGCTGGATGGCGGGA	43	220.422	p53 CDE Neg		C1QL2	TGTGAAGCTGGATGGCGGGA	115	441.081	p53 CDE Neg		C1QL2	TGTGAAGCTGGATGGCGGGA	83	231.706	p53 CDE Neg		C1QL2	TGTGAAGCTGGATGGCGGGA	78	312.427	p53 CDE Neg		C1QL2	TGTGAAGCTGGATGGCGGGA	85	230.437	p53 CDE Neg		C1QL2	TGTGAAGCTGGATGGCGGGA	43	249.688	p53 CDE Neg		C1QL2	TGTGAAGCTGGATGGCGGGA	41	149.997	p53 CDE Neg		C1QL2	TGTGAAGCTGGATGGCGGGA	65	204.16	p53 CDE Neg
C1QL2	TTACACTGCCGCGCCCGGCG	17	87.1437	p53 CDE Neg		C1QL2	TTACACTGCCGCGCCCGGCG	38	145.749	p53 CDE Neg		C1QL2	TTACACTGCCGCGCCCGGCG	60	167.499	p53 CDE Neg		C1QL2	TTACACTGCCGCGCCCGGCG	24	96.1315	p53 CDE Neg		C1QL2	TTACACTGCCGCGCCCGGCG	29	78.6195	p53 CDE Neg		C1QL2	TTACACTGCCGCGCCCGGCG	27	156.781	p53 CDE Neg		C1QL2	TTACACTGCCGCGCCCGGCG	67	245.118	p53 CDE Neg		C1QL2	TTACACTGCCGCGCCCGGCG	91	285.825	p53 CDE Neg
C1orf109	CCTGCTGCTCCTCCACCACG	41	210.17	p53 CDE Pos		C1orf109	CCTGCTGCTCCTCCACCACG	51	195.61	p53 CDE Pos		C1orf109	CCTGCTGCTCCTCCACCACG	0	0	p53 CDE Pos		C1orf109	CCTGCTGCTCCTCCACCACG	3	12.0164	p53 CDE Pos		C1orf109	CCTGCTGCTCCTCCACCACG	95	257.547	p53 CDE Pos		C1orf109	CCTGCTGCTCCTCCACCACG	42	243.881	p53 CDE Pos		C1orf109	CCTGCTGCTCCTCCACCACG	0	0	p53 CDE Pos		C1orf109	CCTGCTGCTCCTCCACCACG	0	0	p53 CDE Pos
C1orf109	CCTTCCCAGATTTAAAAGAG	0	0	p53 CDE Pos		C1orf109	CCTTCCCAGATTTAAAAGAG	0	0	p53 CDE Pos		C1orf109	CCTTCCCAGATTTAAAAGAG	0	0	p53 CDE Pos		C1orf109	CCTTCCCAGATTTAAAAGAG	0	0	p53 CDE Pos		C1orf109	CCTTCCCAGATTTAAAAGAG	0	0	p53 CDE Pos		C1orf109	CCTTCCCAGATTTAAAAGAG	0	0	p53 CDE Pos		C1orf109	CCTTCCCAGATTTAAAAGAG	0	0	p53 CDE Pos		C1orf109	CCTTCCCAGATTTAAAAGAG	0	0	p53 CDE Pos
C1orf109	GCTGAAGAAGTGCTTCCCCG	23	117.9	p53 CDE Pos		C1orf109	GCTGAAGAAGTGCTTCCCCG	45	172.597	p53 CDE Pos		C1orf109	GCTGAAGAAGTGCTTCCCCG	0	0	p53 CDE Pos		C1orf109	GCTGAAGAAGTGCTTCCCCG	0	0	p53 CDE Pos		C1orf109	GCTGAAGAAGTGCTTCCCCG	86	233.148	p53 CDE Pos		C1orf109	GCTGAAGAAGTGCTTCCCCG	18	104.521	p53 CDE Pos		C1orf109	GCTGAAGAAGTGCTTCCCCG	0	0	p53 CDE Pos		C1orf109	GCTGAAGAAGTGCTTCCCCG	0	0	p53 CDE Pos
C1orf109	GTCCTCCCTCAGCAACCTGG	45	230.675	p53 CDE Pos		C1orf109	GTCCTCCCTCAGCAACCTGG	61	233.965	p53 CDE Pos		C1orf109	GTCCTCCCTCAGCAACCTGG	7	19.5415	p53 CDE Pos		C1orf109	GTCCTCCCTCAGCAACCTGG	10	40.0548	p53 CDE Pos		C1orf109	GTCCTCCCTCAGCAACCTGG	75	203.326	p53 CDE Pos		C1orf109	GTCCTCCCTCAGCAACCTGG	43	249.688	p53 CDE Pos		C1orf109	GTCCTCCCTCAGCAACCTGG	0	0	p53 CDE Pos		C1orf109	GTCCTCCCTCAGCAACCTGG	0	0	p53 CDE Pos
C1orf109	CATCGTCCTGGACAAGCTAG	41	210.17	p53 CDE Pos		C1orf109	CATCGTCCTGGACAAGCTAG	39	149.584	p53 CDE Pos		C1orf109	CATCGTCCTGGACAAGCTAG	3	8.37493	p53 CDE Pos		C1orf109	CATCGTCCTGGACAAGCTAG	5	20.0274	p53 CDE Pos		C1orf109	CATCGTCCTGGACAAGCTAG	35	94.8857	p53 CDE Pos		C1orf109	CATCGTCCTGGACAAGCTAG	27	156.781	p53 CDE Pos		C1orf109	CATCGTCCTGGACAAGCTAG	0	0	p53 CDE Pos		C1orf109	CATCGTCCTGGACAAGCTAG	0	0	p53 CDE Pos
C1orf109	TCCAGGTTACCCTTCCCGAG	38	194.792	p53 CDE Pos		C1orf109	TCCAGGTTACCCTTCCCGAG	61	233.965	p53 CDE Pos		C1orf109	TCCAGGTTACCCTTCCCGAG	228	636.495	p53 CDE Pos		C1orf109	TCCAGGTTACCCTTCCCGAG	66	264.362	p53 CDE Pos		C1orf109	TCCAGGTTACCCTTCCCGAG	67	181.638	p53 CDE Pos		C1orf109	TCCAGGTTACCCTTCCCGAG	47	272.915	p53 CDE Pos		C1orf109	TCCAGGTTACCCTTCCCGAG	54	197.558	p53 CDE Pos		C1orf109	TCCAGGTTACCCTTCCCGAG	86	270.12	p53 CDE Pos
C1orf109	TCTGAAACACTCGCTCCACA	58	297.314	p53 CDE Pos		C1orf109	TCTGAAACACTCGCTCCACA	73	279.991	p53 CDE Pos		C1orf109	TCTGAAACACTCGCTCCACA	78	217.748	p53 CDE Pos		C1orf109	TCTGAAACACTCGCTCCACA	33	132.181	p53 CDE Pos		C1orf109	TCTGAAACACTCGCTCCACA	97	262.969	p53 CDE Pos		C1orf109	TCTGAAACACTCGCTCCACA	40	232.268	p53 CDE Pos		C1orf109	TCTGAAACACTCGCTCCACA	1	3.65847	p53 CDE Pos		C1orf109	TCTGAAACACTCGCTCCACA	7	21.9865	p53 CDE Pos
C1orf109	CCGGCACATCCTCAAACCGC	36	184.54	p53 CDE Pos		C1orf109	CCGGCACATCCTCAAACCGC	35	134.242	p53 CDE Pos		C1orf109	CCGGCACATCCTCAAACCGC	7	19.5415	p53 CDE Pos		C1orf109	CCGGCACATCCTCAAACCGC	20	80.1096	p53 CDE Pos		C1orf109	CCGGCACATCCTCAAACCGC	58	157.239	p53 CDE Pos		C1orf109	CCGGCACATCCTCAAACCGC	20	116.134	p53 CDE Pos		C1orf109	CCGGCACATCCTCAAACCGC	1	3.65847	p53 CDE Pos		C1orf109	CCGGCACATCCTCAAACCGC	0	0	p53 CDE Pos
C1orf109	CCTTCCCAGATTTAAAAGAG	0	0	p53 CDE Pos		C1orf109	CCTTCCCAGATTTAAAAGAG	0	0	p53 CDE Pos		C1orf109	CCTTCCCAGATTTAAAAGAG	0	0	p53 CDE Pos		C1orf109	CCTTCCCAGATTTAAAAGAG	0	0	p53 CDE Pos		C1orf109	CCTTCCCAGATTTAAAAGAG	0	0	p53 CDE Pos		C1orf109	CCTTCCCAGATTTAAAAGAG	0	0	p53 CDE Pos		C1orf109	CCTTCCCAGATTTAAAAGAG	0	0	p53 CDE Pos		C1orf109	CCTTCCCAGATTTAAAAGAG	0	0	p53 CDE Pos
C1orf109	GAAGAAGTGCTTCCCCGTGG	58	297.314	p53 CDE Pos		C1orf109	GAAGAAGTGCTTCCCCGTGG	95	364.371	p53 CDE Pos		C1orf109	GAAGAAGTGCTTCCCCGTGG	0	0	p53 CDE Pos		C1orf109	GAAGAAGTGCTTCCCCGTGG	8	32.0438	p53 CDE Pos		C1orf109	GAAGAAGTGCTTCCCCGTGG	131	355.143	p53 CDE Pos		C1orf109	GAAGAAGTGCTTCCCCGTGG	51	296.141	p53 CDE Pos		C1orf109	GAAGAAGTGCTTCCCCGTGG	0	0	p53 CDE Pos		C1orf109	GAAGAAGTGCTTCCCCGTGG	0	0	p53 CDE Pos
C20orf24	CCGCAGCACCTTACTCCAGA	40	205.044	p53 CDE Pos		C20orf24	CCGCAGCACCTTACTCCAGA	50	191.774	p53 CDE Pos		C20orf24	CCGCAGCACCTTACTCCAGA	16	44.6663	p53 CDE Pos		C20orf24	CCGCAGCACCTTACTCCAGA	44	176.241	p53 CDE Pos		C20orf24	CCGCAGCACCTTACTCCAGA	78	211.459	p53 CDE Pos		C20orf24	CCGCAGCACCTTACTCCAGA	44	255.495	p53 CDE Pos		C20orf24	CCGCAGCACCTTACTCCAGA	30	109.754	p53 CDE Pos		C20orf24	CCGCAGCACCTTACTCCAGA	76	238.711	p53 CDE Pos
C20orf24	TAAGGTGCTGCGGAGCGACG	59	302.44	p53 CDE Pos		C20orf24	TAAGGTGCTGCGGAGCGACG	58	222.458	p53 CDE Pos		C20orf24	TAAGGTGCTGCGGAGCGACG	66	184.248	p53 CDE Pos		C20orf24	TAAGGTGCTGCGGAGCGACG	67	268.367	p53 CDE Pos		C20orf24	TAAGGTGCTGCGGAGCGACG	75	203.326	p53 CDE Pos		C20orf24	TAAGGTGCTGCGGAGCGACG	48	278.721	p53 CDE Pos		C20orf24	TAAGGTGCTGCGGAGCGACG	14	51.2186	p53 CDE Pos		C20orf24	TAAGGTGCTGCGGAGCGACG	0	0	p53 CDE Pos
C20orf24	CCGTCTGGAGTAAGGTGCTG	57	292.188	p53 CDE Pos		C20orf24	CCGTCTGGAGTAAGGTGCTG	90	345.194	p53 CDE Pos		C20orf24	CCGTCTGGAGTAAGGTGCTG	222	619.745	p53 CDE Pos		C20orf24	CCGTCTGGAGTAAGGTGCTG	144	576.789	p53 CDE Pos		C20orf24	CCGTCTGGAGTAAGGTGCTG	118	319.9	p53 CDE Pos		C20orf24	CCGTCTGGAGTAAGGTGCTG	45	261.301	p53 CDE Pos		C20orf24	CCGTCTGGAGTAAGGTGCTG	48	175.607	p53 CDE Pos		C20orf24	CCGTCTGGAGTAAGGTGCTG	31	97.3688	p53 CDE Pos
C20orf24	CCACCGTACCTTATCCTCCC	70	358.827	p53 CDE Pos		C20orf24	CCACCGTACCTTATCCTCCC	75	287.662	p53 CDE Pos		C20orf24	CCACCGTACCTTATCCTCCC	47	131.207	p53 CDE Pos		C20orf24	CCACCGTACCTTATCCTCCC	43	172.236	p53 CDE Pos		C20orf24	CCACCGTACCTTATCCTCCC	63	170.794	p53 CDE Pos		C20orf24	CCACCGTACCTTATCCTCCC	25	145.167	p53 CDE Pos		C20orf24	CCACCGTACCTTATCCTCCC	31	113.413	p53 CDE Pos		C20orf24	CCACCGTACCTTATCCTCCC	24	75.3823	p53 CDE Pos
C20orf24	TCAGCCGCAGCTGGCCAACG	8	41.0088	p53 CDE Pos		C20orf24	TCAGCCGCAGCTGGCCAACG	31	118.9	p53 CDE Pos		C20orf24	TCAGCCGCAGCTGGCCAACG	9	25.1248	p53 CDE Pos		C20orf24	TCAGCCGCAGCTGGCCAACG	14	56.0767	p53 CDE Pos		C20orf24	TCAGCCGCAGCTGGCCAACG	30	81.3306	p53 CDE Pos		C20orf24	TCAGCCGCAGCTGGCCAACG	15	87.1004	p53 CDE Pos		C20orf24	TCAGCCGCAGCTGGCCAACG	0	0	p53 CDE Pos		C20orf24	TCAGCCGCAGCTGGCCAACG	0	0	p53 CDE Pos
C20orf24	ATTCCCAAGAACCCTCGTAA	72	369.079	p53 CDE Pos		C20orf24	ATTCCCAAGAACCCTCGTAA	63	241.636	p53 CDE Pos		C20orf24	ATTCCCAAGAACCCTCGTAA	47	131.207	p53 CDE Pos		C20orf24	ATTCCCAAGAACCCTCGTAA	58	232.318	p53 CDE Pos		C20orf24	ATTCCCAAGAACCCTCGTAA	160	433.763	p53 CDE Pos		C20orf24	ATTCCCAAGAACCCTCGTAA	47	272.915	p53 CDE Pos		C20orf24	ATTCCCAAGAACCCTCGTAA	45	164.631	p53 CDE Pos		C20orf24	ATTCCCAAGAACCCTCGTAA	29	91.087	p53 CDE Pos
C20orf24	GGACCACAGCAATGATCTGT	103	527.989	p53 CDE Pos		C20orf24	GGACCACAGCAATGATCTGT	88	337.523	p53 CDE Pos		C20orf24	GGACCACAGCAATGATCTGT	169	471.788	p53 CDE Pos		C20orf24	GGACCACAGCAATGATCTGT	80	320.438	p53 CDE Pos		C20orf24	GGACCACAGCAATGATCTGT	152	412.075	p53 CDE Pos		C20orf24	GGACCACAGCAATGATCTGT	52	301.948	p53 CDE Pos		C20orf24	GGACCACAGCAATGATCTGT	0	0	p53 CDE Pos		C20orf24	GGACCACAGCAATGATCTGT	10	31.4093	p53 CDE Pos
C20orf24	AAACTCCCCAAATGACACCC	46	235.801	p53 CDE Pos		C20orf24	AAACTCCCCAAATGACACCC	68	260.813	p53 CDE Pos		C20orf24	AAACTCCCCAAATGACACCC	72	200.998	p53 CDE Pos		C20orf24	AAACTCCCCAAATGACACCC	31	124.17	p53 CDE Pos		C20orf24	AAACTCCCCAAATGACACCC	135	365.988	p53 CDE Pos		C20orf24	AAACTCCCCAAATGACACCC	55	319.368	p53 CDE Pos		C20orf24	AAACTCCCCAAATGACACCC	26	95.1203	p53 CDE Pos		C20orf24	AAACTCCCCAAATGACACCC	26	81.6642	p53 CDE Pos
C20orf24	GAGCGGCGGGCGGCGGAAGG	8	41.0088	p53 CDE Pos		C20orf24	GAGCGGCGGGCGGCGGAAGG	5	19.1774	p53 CDE Pos		C20orf24	GAGCGGCGGGCGGCGGAAGG	3	8.37493	p53 CDE Pos		C20orf24	GAGCGGCGGGCGGCGGAAGG	5	20.0274	p53 CDE Pos		C20orf24	GAGCGGCGGGCGGCGGAAGG	11	29.8212	p53 CDE Pos		C20orf24	GAGCGGCGGGCGGCGGAAGG	4	23.2268	p53 CDE Pos		C20orf24	GAGCGGCGGGCGGCGGAAGG	4	14.6339	p53 CDE Pos		C20orf24	GAGCGGCGGGCGGCGGAAGG	0	0	p53 CDE Pos
C20orf24	AGATTCTGCCTGATCAATGC	11	56.3871	p53 CDE Pos		C20orf24	AGATTCTGCCTGATCAATGC	58	222.458	p53 CDE Pos		C20orf24	AGATTCTGCCTGATCAATGC	26	72.5827	p53 CDE Pos		C20orf24	AGATTCTGCCTGATCAATGC	22	88.1205	p53 CDE Pos		C20orf24	AGATTCTGCCTGATCAATGC	66	178.927	p53 CDE Pos		C20orf24	AGATTCTGCCTGATCAATGC	14	81.2937	p53 CDE Pos		C20orf24	AGATTCTGCCTGATCAATGC	10	36.5847	p53 CDE Pos		C20orf24	AGATTCTGCCTGATCAATGC	19	59.6777	p53 CDE Pos
C20orf85	GAAACCTCTCAGCACCGCGG	118	604.88	p53 CDE Neutral		C20orf85	GAAACCTCTCAGCACCGCGG	124	475.601	p53 CDE Neutral		C20orf85	GAAACCTCTCAGCACCGCGG	107	298.706	p53 CDE Neutral		C20orf85	GAAACCTCTCAGCACCGCGG	68	272.373	p53 CDE Neutral		C20orf85	GAAACCTCTCAGCACCGCGG	181	490.694	p53 CDE Neutral		C20orf85	GAAACCTCTCAGCACCGCGG	58	336.788	p53 CDE Neutral		C20orf85	GAAACCTCTCAGCACCGCGG	151	552.43	p53 CDE Neutral		C20orf85	GAAACCTCTCAGCACCGCGG	227	712.991	p53 CDE Neutral
C20orf85	GCAGAAACCTCTCAGCACCG	0	0	p53 CDE Neutral		C20orf85	GCAGAAACCTCTCAGCACCG	0	0	p53 CDE Neutral		C20orf85	GCAGAAACCTCTCAGCACCG	0	0	p53 CDE Neutral		C20orf85	GCAGAAACCTCTCAGCACCG	0	0	p53 CDE Neutral		C20orf85	GCAGAAACCTCTCAGCACCG	0	0	p53 CDE Neutral		C20orf85	GCAGAAACCTCTCAGCACCG	0	0	p53 CDE Neutral		C20orf85	GCAGAAACCTCTCAGCACCG	0	0	p53 CDE Neutral		C20orf85	GCAGAAACCTCTCAGCACCG	0	0	p53 CDE Neutral
C20orf85	GTTCATGCGTTCAGCCGCCG	27	138.405	p53 CDE Neutral		C20orf85	GTTCATGCGTTCAGCCGCCG	52	199.445	p53 CDE Neutral		C20orf85	GTTCATGCGTTCAGCCGCCG	48	133.999	p53 CDE Neutral		C20orf85	GTTCATGCGTTCAGCCGCCG	36	144.197	p53 CDE Neutral		C20orf85	GTTCATGCGTTCAGCCGCCG	86	233.148	p53 CDE Neutral		C20orf85	GTTCATGCGTTCAGCCGCCG	30	174.201	p53 CDE Neutral		C20orf85	GTTCATGCGTTCAGCCGCCG	11	40.2432	p53 CDE Neutral		C20orf85	GTTCATGCGTTCAGCCGCCG	0	0	p53 CDE Neutral
C20orf85	TTATATTTACCTCCTCAAAA	53	271.683	p53 CDE Neutral		C20orf85	TTATATTTACCTCCTCAAAA	70	268.484	p53 CDE Neutral		C20orf85	TTATATTTACCTCCTCAAAA	158	441.08	p53 CDE Neutral		C20orf85	TTATATTTACCTCCTCAAAA	129	516.707	p53 CDE Neutral		C20orf85	TTATATTTACCTCCTCAAAA	102	276.524	p53 CDE Neutral		C20orf85	TTATATTTACCTCCTCAAAA	41	238.074	p53 CDE Neutral		C20orf85	TTATATTTACCTCCTCAAAA	9	32.9263	p53 CDE Neutral		C20orf85	TTATATTTACCTCCTCAAAA	45	141.342	p53 CDE Neutral
C20orf85	GCAGAAACCTCTCAGCACCG	0	0	p53 CDE Neutral		C20orf85	GCAGAAACCTCTCAGCACCG	0	0	p53 CDE Neutral		C20orf85	GCAGAAACCTCTCAGCACCG	0	0	p53 CDE Neutral		C20orf85	GCAGAAACCTCTCAGCACCG	0	0	p53 CDE Neutral		C20orf85	GCAGAAACCTCTCAGCACCG	0	0	p53 CDE Neutral		C20orf85	GCAGAAACCTCTCAGCACCG	0	0	p53 CDE Neutral		C20orf85	GCAGAAACCTCTCAGCACCG	0	0	p53 CDE Neutral		C20orf85	GCAGAAACCTCTCAGCACCG	0	0	p53 CDE Neutral
C20orf85	CTGGGGGGGATGGAAAGACC	19	97.3959	p53 CDE Neutral		C20orf85	CTGGGGGGGATGGAAAGACC	33	126.571	p53 CDE Neutral		C20orf85	CTGGGGGGGATGGAAAGACC	56	156.332	p53 CDE Neutral		C20orf85	CTGGGGGGGATGGAAAGACC	36	144.197	p53 CDE Neutral		C20orf85	CTGGGGGGGATGGAAAGACC	22	59.6424	p53 CDE Neutral		C20orf85	CTGGGGGGGATGGAAAGACC	6	34.8402	p53 CDE Neutral		C20orf85	CTGGGGGGGATGGAAAGACC	0	0	p53 CDE Neutral		C20orf85	CTGGGGGGGATGGAAAGACC	0	0	p53 CDE Neutral
C20orf85	TGAAGGCTGAATCGGAAGCA	109	558.745	p53 CDE Neutral		C20orf85	TGAAGGCTGAATCGGAAGCA	71	272.32	p53 CDE Neutral		C20orf85	TGAAGGCTGAATCGGAAGCA	220	614.161	p53 CDE Neutral		C20orf85	TGAAGGCTGAATCGGAAGCA	58	232.318	p53 CDE Neutral		C20orf85	TGAAGGCTGAATCGGAAGCA	98	265.68	p53 CDE Neutral		C20orf85	TGAAGGCTGAATCGGAAGCA	60	348.402	p53 CDE Neutral		C20orf85	TGAAGGCTGAATCGGAAGCA	40	146.339	p53 CDE Neutral		C20orf85	TGAAGGCTGAATCGGAAGCA	58	182.174	p53 CDE Neutral
C20orf85	GCTGAACGCATGAACCTTGT	99	507.484	p53 CDE Neutral		C20orf85	GCTGAACGCATGAACCTTGT	85	326.017	p53 CDE Neutral		C20orf85	GCTGAACGCATGAACCTTGT	104	290.331	p53 CDE Neutral		C20orf85	GCTGAACGCATGAACCTTGT	24	96.1315	p53 CDE Neutral		C20orf85	GCTGAACGCATGAACCTTGT	71	192.482	p53 CDE Neutral		C20orf85	GCTGAACGCATGAACCTTGT	43	249.688	p53 CDE Neutral		C20orf85	GCTGAACGCATGAACCTTGT	119	435.358	p53 CDE Neutral		C20orf85	GCTGAACGCATGAACCTTGT	156	489.985	p53 CDE Neutral
C20orf85	GTTAAAAACCCCCAGTTCTG	20	102.522	p53 CDE Neutral		C20orf85	GTTAAAAACCCCCAGTTCTG	62	237.8	p53 CDE Neutral		C20orf85	GTTAAAAACCCCCAGTTCTG	75	209.373	p53 CDE Neutral		C20orf85	GTTAAAAACCCCCAGTTCTG	51	204.279	p53 CDE Neutral		C20orf85	GTTAAAAACCCCCAGTTCTG	40	108.441	p53 CDE Neutral		C20orf85	GTTAAAAACCCCCAGTTCTG	31	180.008	p53 CDE Neutral		C20orf85	GTTAAAAACCCCCAGTTCTG	15	54.8771	p53 CDE Neutral		C20orf85	GTTAAAAACCCCCAGTTCTG	0	0	p53 CDE Neutral
C20orf85	TGAGCGTTTCCGCATCCGGC	15	76.8915	p53 CDE Neutral		C20orf85	TGAGCGTTTCCGCATCCGGC	11	42.1904	p53 CDE Neutral		C20orf85	TGAGCGTTTCCGCATCCGGC	53	147.957	p53 CDE Neutral		C20orf85	TGAGCGTTTCCGCATCCGGC	31	124.17	p53 CDE Neutral		C20orf85	TGAGCGTTTCCGCATCCGGC	35	94.8857	p53 CDE Neutral		C20orf85	TGAGCGTTTCCGCATCCGGC	27	156.781	p53 CDE Neutral		C20orf85	TGAGCGTTTCCGCATCCGGC	5	18.2924	p53 CDE Neutral		C20orf85	TGAGCGTTTCCGCATCCGGC	0	0	p53 CDE Neutral
C2orf71	TGAAGCGTCCATCGGCCTGG	55	281.936	p53 CDE Neutral		C2orf71	TGAAGCGTCCATCGGCCTGG	88	337.523	p53 CDE Neutral		C2orf71	TGAAGCGTCCATCGGCCTGG	116	323.831	p53 CDE Neutral		C2orf71	TGAAGCGTCCATCGGCCTGG	50	200.274	p53 CDE Neutral		C2orf71	TGAAGCGTCCATCGGCCTGG	129	349.721	p53 CDE Neutral		C2orf71	TGAAGCGTCCATCGGCCTGG	75	435.502	p53 CDE Neutral		C2orf71	TGAAGCGTCCATCGGCCTGG	125	457.309	p53 CDE Neutral		C2orf71	TGAAGCGTCCATCGGCCTGG	199	625.045	p53 CDE Neutral
C2orf71	AGAGCCCGAAGAATGGAAGT	35	179.414	p53 CDE Neutral		C2orf71	AGAGCCCGAAGAATGGAAGT	43	164.926	p53 CDE Neutral		C2orf71	AGAGCCCGAAGAATGGAAGT	26	72.5827	p53 CDE Neutral		C2orf71	AGAGCCCGAAGAATGGAAGT	12	48.0658	p53 CDE Neutral		C2orf71	AGAGCCCGAAGAATGGAAGT	51	138.262	p53 CDE Neutral		C2orf71	AGAGCCCGAAGAATGGAAGT	60	348.402	p53 CDE Neutral		C2orf71	AGAGCCCGAAGAATGGAAGT	76	278.044	p53 CDE Neutral		C2orf71	AGAGCCCGAAGAATGGAAGT	137	430.307	p53 CDE Neutral
C2orf71	GGGGCATGATGCAATTCCTG	19	97.3959	p53 CDE Neutral		C2orf71	GGGGCATGATGCAATTCCTG	44	168.761	p53 CDE Neutral		C2orf71	GGGGCATGATGCAATTCCTG	92	256.831	p53 CDE Neutral		C2orf71	GGGGCATGATGCAATTCCTG	46	184.252	p53 CDE Neutral		C2orf71	GGGGCATGATGCAATTCCTG	69	187.06	p53 CDE Neutral		C2orf71	GGGGCATGATGCAATTCCTG	9	52.2603	p53 CDE Neutral		C2orf71	GGGGCATGATGCAATTCCTG	23	84.1449	p53 CDE Neutral		C2orf71	GGGGCATGATGCAATTCCTG	36	113.073	p53 CDE Neutral
C2orf71	GGGTTCCCATGGATCACAAG	38	194.792	p53 CDE Neutral		C2orf71	GGGTTCCCATGGATCACAAG	38	145.749	p53 CDE Neutral		C2orf71	GGGTTCCCATGGATCACAAG	112	312.664	p53 CDE Neutral		C2orf71	GGGTTCCCATGGATCACAAG	80	320.438	p53 CDE Neutral		C2orf71	GGGTTCCCATGGATCACAAG	86	233.148	p53 CDE Neutral		C2orf71	GGGTTCCCATGGATCACAAG	20	116.134	p53 CDE Neutral		C2orf71	GGGTTCCCATGGATCACAAG	6	21.9508	p53 CDE Neutral		C2orf71	GGGTTCCCATGGATCACAAG	16	50.2549	p53 CDE Neutral
C2orf71	TGAAGGAGTCAATCAGCGAA	7	35.8827	p53 CDE Neutral		C2orf71	TGAAGGAGTCAATCAGCGAA	58	222.458	p53 CDE Neutral		C2orf71	TGAAGGAGTCAATCAGCGAA	52	145.165	p53 CDE Neutral		C2orf71	TGAAGGAGTCAATCAGCGAA	34	136.186	p53 CDE Neutral		C2orf71	TGAAGGAGTCAATCAGCGAA	61	165.372	p53 CDE Neutral		C2orf71	TGAAGGAGTCAATCAGCGAA	27	156.781	p53 CDE Neutral		C2orf71	TGAAGGAGTCAATCAGCGAA	7	25.6093	p53 CDE Neutral		C2orf71	TGAAGGAGTCAATCAGCGAA	3	9.42279	p53 CDE Neutral
C2orf71	CCCCATCCTGAGGACGAACA	23	117.9	p53 CDE Neutral		C2orf71	CCCCATCCTGAGGACGAACA	51	195.61	p53 CDE Neutral		C2orf71	CCCCATCCTGAGGACGAACA	50	139.582	p53 CDE Neutral		C2orf71	CCCCATCCTGAGGACGAACA	47	188.258	p53 CDE Neutral		C2orf71	CCCCATCCTGAGGACGAACA	92	249.414	p53 CDE Neutral		C2orf71	CCCCATCCTGAGGACGAACA	23	133.554	p53 CDE Neutral		C2orf71	CCCCATCCTGAGGACGAACA	7	25.6093	p53 CDE Neutral		C2orf71	CCCCATCCTGAGGACGAACA	10	31.4093	p53 CDE Neutral
C2orf71	TCCATCAGAACTTCCATAGG	45	230.675	p53 CDE Neutral		C2orf71	TCCATCAGAACTTCCATAGG	91	349.029	p53 CDE Neutral		C2orf71	TCCATCAGAACTTCCATAGG	154	429.913	p53 CDE Neutral		C2orf71	TCCATCAGAACTTCCATAGG	127	508.696	p53 CDE Neutral		C2orf71	TCCATCAGAACTTCCATAGG	38	103.019	p53 CDE Neutral		C2orf71	TCCATCAGAACTTCCATAGG	45	261.301	p53 CDE Neutral		C2orf71	TCCATCAGAACTTCCATAGG	5	18.2924	p53 CDE Neutral		C2orf71	TCCATCAGAACTTCCATAGG	26	81.6642	p53 CDE Neutral
C2orf71	GCTGAGCACAAAAAGGAATG	75	384.458	p53 CDE Neutral		C2orf71	GCTGAGCACAAAAAGGAATG	120	460.259	p53 CDE Neutral		C2orf71	GCTGAGCACAAAAAGGAATG	71	198.207	p53 CDE Neutral		C2orf71	GCTGAGCACAAAAAGGAATG	115	460.63	p53 CDE Neutral		C2orf71	GCTGAGCACAAAAAGGAATG	100	271.102	p53 CDE Neutral		C2orf71	GCTGAGCACAAAAAGGAATG	70	406.469	p53 CDE Neutral		C2orf71	GCTGAGCACAAAAAGGAATG	35	128.047	p53 CDE Neutral		C2orf71	GCTGAGCACAAAAAGGAATG	30	94.2279	p53 CDE Neutral
C2orf71	AGGAGCTGCGAAGGGTCCAG	60	307.566	p53 CDE Neutral		C2orf71	AGGAGCTGCGAAGGGTCCAG	54	207.116	p53 CDE Neutral		C2orf71	AGGAGCTGCGAAGGGTCCAG	140	390.83	p53 CDE Neutral		C2orf71	AGGAGCTGCGAAGGGTCCAG	163	652.893	p53 CDE Neutral		C2orf71	AGGAGCTGCGAAGGGTCCAG	64	173.505	p53 CDE Neutral		C2orf71	AGGAGCTGCGAAGGGTCCAG	41	238.074	p53 CDE Neutral		C2orf71	AGGAGCTGCGAAGGGTCCAG	112	409.749	p53 CDE Neutral		C2orf71	AGGAGCTGCGAAGGGTCCAG	26	81.6642	p53 CDE Neutral
C2orf71	AATTCTGTGCATCATCCATC	81	415.214	p53 CDE Neutral		C2orf71	AATTCTGTGCATCATCCATC	163	625.185	p53 CDE Neutral		C2orf71	AATTCTGTGCATCATCCATC	235	656.036	p53 CDE Neutral		C2orf71	AATTCTGTGCATCATCCATC	149	596.816	p53 CDE Neutral		C2orf71	AATTCTGTGCATCATCCATC	177	479.85	p53 CDE Neutral		C2orf71	AATTCTGTGCATCATCCATC	102	592.283	p53 CDE Neutral		C2orf71	AATTCTGTGCATCATCCATC	126	460.968	p53 CDE Neutral		C2orf71	AATTCTGTGCATCATCCATC	200	628.186	p53 CDE Neutral
CA7	AAAAAACACCAACCACAGCC	32	164.035	p53 CDE Neutral		CA7	AAAAAACACCAACCACAGCC	47	180.268	p53 CDE Neutral		CA7	AAAAAACACCAACCACAGCC	66	184.248	p53 CDE Neutral		CA7	AAAAAACACCAACCACAGCC	110	440.603	p53 CDE Neutral		CA7	AAAAAACACCAACCACAGCC	59	159.95	p53 CDE Neutral		CA7	AAAAAACACCAACCACAGCC	19	110.327	p53 CDE Neutral		CA7	AAAAAACACCAACCACAGCC	25	91.4619	p53 CDE Neutral		CA7	AAAAAACACCAACCACAGCC	16	50.2549	p53 CDE Neutral
CA7	AGTGGAAGTGAAACTGCTTG	47	240.927	p53 CDE Neutral		CA7	AGTGGAAGTGAAACTGCTTG	64	245.471	p53 CDE Neutral		CA7	AGTGGAAGTGAAACTGCTTG	123	343.372	p53 CDE Neutral		CA7	AGTGGAAGTGAAACTGCTTG	86	344.471	p53 CDE Neutral		CA7	AGTGGAAGTGAAACTGCTTG	140	379.543	p53 CDE Neutral		CA7	AGTGGAAGTGAAACTGCTTG	68	394.855	p53 CDE Neutral		CA7	AGTGGAAGTGAAACTGCTTG	31	113.413	p53 CDE Neutral		CA7	AGTGGAAGTGAAACTGCTTG	5	15.7047	p53 CDE Neutral
CA7	CATCGTGCTTCTTGCCCCAG	40	205.044	p53 CDE Neutral		CA7	CATCGTGCTTCTTGCCCCAG	61	233.965	p53 CDE Neutral		CA7	CATCGTGCTTCTTGCCCCAG	16	44.6663	p53 CDE Neutral		CA7	CATCGTGCTTCTTGCCCCAG	12	48.0658	p53 CDE Neutral		CA7	CATCGTGCTTCTTGCCCCAG	69	187.06	p53 CDE Neutral		CA7	CATCGTGCTTCTTGCCCCAG	44	255.495	p53 CDE Neutral		CA7	CATCGTGCTTCTTGCCCCAG	66	241.459	p53 CDE Neutral		CA7	CATCGTGCTTCTTGCCCCAG	35	109.933	p53 CDE Neutral
CA7	CTACCCACAGTGGTGACTGG	3	15.3783	p53 CDE Neutral		CA7	CTACCCACAGTGGTGACTGG	0	0	p53 CDE Neutral		CA7	CTACCCACAGTGGTGACTGG	23	64.2078	p53 CDE Neutral		CA7	CTACCCACAGTGGTGACTGG	46	184.252	p53 CDE Neutral		CA7	CTACCCACAGTGGTGACTGG	6	16.2661	p53 CDE Neutral		CA7	CTACCCACAGTGGTGACTGG	3	17.4201	p53 CDE Neutral		CA7	CTACCCACAGTGGTGACTGG	0	0	p53 CDE Neutral		CA7	CTACCCACAGTGGTGACTGG	1	3.14093	p53 CDE Neutral
CA7	GCCTCATAGGAAAGCTCCAG	69	353.701	p53 CDE Neutral		CA7	GCCTCATAGGAAAGCTCCAG	117	448.752	p53 CDE Neutral		CA7	GCCTCATAGGAAAGCTCCAG	126	351.747	p53 CDE Neutral		CA7	GCCTCATAGGAAAGCTCCAG	118	472.647	p53 CDE Neutral		CA7	GCCTCATAGGAAAGCTCCAG	132	357.854	p53 CDE Neutral		CA7	GCCTCATAGGAAAGCTCCAG	61	354.208	p53 CDE Neutral		CA7	GCCTCATAGGAAAGCTCCAG	293	1071.93	p53 CDE Neutral		CA7	GCCTCATAGGAAAGCTCCAG	468	1469.96	p53 CDE Neutral
CA7	GGAAGTGAAACTGCTTGAGG	56	287.062	p53 CDE Neutral		CA7	GGAAGTGAAACTGCTTGAGG	81	310.675	p53 CDE Neutral		CA7	GGAAGTGAAACTGCTTGAGG	27	75.3744	p53 CDE Neutral		CA7	GGAAGTGAAACTGCTTGAGG	12	48.0658	p53 CDE Neutral		CA7	GGAAGTGAAACTGCTTGAGG	93	252.125	p53 CDE Neutral		CA7	GGAAGTGAAACTGCTTGAGG	56	325.175	p53 CDE Neutral		CA7	GGAAGTGAAACTGCTTGAGG	7	25.6093	p53 CDE Neutral		CA7	GGAAGTGAAACTGCTTGAGG	19	59.6777	p53 CDE Neutral
CA7	GGAGGGCCCGTACCTCGCTG	36	184.54	p53 CDE Neutral		CA7	GGAGGGCCCGTACCTCGCTG	62	237.8	p53 CDE Neutral		CA7	GGAGGGCCCGTACCTCGCTG	42	117.249	p53 CDE Neutral		CA7	GGAGGGCCCGTACCTCGCTG	13	52.0712	p53 CDE Neutral		CA7	GGAGGGCCCGTACCTCGCTG	87	235.859	p53 CDE Neutral		CA7	GGAGGGCCCGTACCTCGCTG	35	203.234	p53 CDE Neutral		CA7	GGAGGGCCCGTACCTCGCTG	9	32.9263	p53 CDE Neutral		CA7	GGAGGGCCCGTACCTCGCTG	0	0	p53 CDE Neutral
CA7	TCCCTCAGCATCACCAACAA	70	358.827	p53 CDE Neutral		CA7	TCCCTCAGCATCACCAACAA	106	406.562	p53 CDE Neutral		CA7	TCCCTCAGCATCACCAACAA	42	117.249	p53 CDE Neutral		CA7	TCCCTCAGCATCACCAACAA	34	136.186	p53 CDE Neutral		CA7	TCCCTCAGCATCACCAACAA	127	344.299	p53 CDE Neutral		CA7	TCCCTCAGCATCACCAACAA	59	342.595	p53 CDE Neutral		CA7	TCCCTCAGCATCACCAACAA	14	51.2186	p53 CDE Neutral		CA7	TCCCTCAGCATCACCAACAA	1	3.14093	p53 CDE Neutral
CA7	TGTGGGTTCTGAGCACACGG	0	0	p53 CDE Neutral		CA7	TGTGGGTTCTGAGCACACGG	0	0	p53 CDE Neutral		CA7	TGTGGGTTCTGAGCACACGG	0	0	p53 CDE Neutral		CA7	TGTGGGTTCTGAGCACACGG	0	0	p53 CDE Neutral		CA7	TGTGGGTTCTGAGCACACGG	0	0	p53 CDE Neutral		CA7	TGTGGGTTCTGAGCACACGG	0	0	p53 CDE Neutral		CA7	TGTGGGTTCTGAGCACACGG	0	0	p53 CDE Neutral		CA7	TGTGGGTTCTGAGCACACGG	0	0	p53 CDE Neutral
CA7	TGTGGGTTCTGAGCACACGG	0	0	p53 CDE Neutral		CA7	TGTGGGTTCTGAGCACACGG	0	0	p53 CDE Neutral		CA7	TGTGGGTTCTGAGCACACGG	0	0	p53 CDE Neutral		CA7	TGTGGGTTCTGAGCACACGG	0	0	p53 CDE Neutral		CA7	TGTGGGTTCTGAGCACACGG	0	0	p53 CDE Neutral		CA7	TGTGGGTTCTGAGCACACGG	0	0	p53 CDE Neutral		CA7	TGTGGGTTCTGAGCACACGG	0	0	p53 CDE Neutral		CA7	TGTGGGTTCTGAGCACACGG	0	0	p53 CDE Neutral
CARS	AAGCGGGCTGAAGCACCACA	16	82.0176	p53 CDE Neg		CARS	AAGCGGGCTGAAGCACCACA	10	38.3549	p53 CDE Neg		CARS	AAGCGGGCTGAAGCACCACA	16	44.6663	p53 CDE Neg		CARS	AAGCGGGCTGAAGCACCACA	8	32.0438	p53 CDE Neg		CARS	AAGCGGGCTGAAGCACCACA	22	59.6424	p53 CDE Neg		CARS	AAGCGGGCTGAAGCACCACA	12	69.6803	p53 CDE Neg		CARS	AAGCGGGCTGAAGCACCACA	0	0	p53 CDE Neg		CARS	AAGCGGGCTGAAGCACCACA	6	18.8456	p53 CDE Neg
CARS	ACCGCACCCCAAGCTCGGGC	28	143.531	p53 CDE Neg		CARS	ACCGCACCCCAAGCTCGGGC	31	118.9	p53 CDE Neg		CARS	ACCGCACCCCAAGCTCGGGC	30	83.7493	p53 CDE Neg		CARS	ACCGCACCCCAAGCTCGGGC	24	96.1315	p53 CDE Neg		CARS	ACCGCACCCCAAGCTCGGGC	42	113.863	p53 CDE Neg		CARS	ACCGCACCCCAAGCTCGGGC	36	209.041	p53 CDE Neg		CARS	ACCGCACCCCAAGCTCGGGC	669	2447.52	p53 CDE Neg		CARS	ACCGCACCCCAAGCTCGGGC	334	1049.07	p53 CDE Neg
CARS	ACTGGGGGGAATCTTCATCT	50	256.305	p53 CDE Neg		CARS	ACTGGGGGGAATCTTCATCT	56	214.787	p53 CDE Neg		CARS	ACTGGGGGGAATCTTCATCT	76	212.165	p53 CDE Neg		CARS	ACTGGGGGGAATCTTCATCT	47	188.258	p53 CDE Neg		CARS	ACTGGGGGGAATCTTCATCT	115	311.767	p53 CDE Neg		CARS	ACTGGGGGGAATCTTCATCT	49	284.528	p53 CDE Neg		CARS	ACTGGGGGGAATCTTCATCT	0	0	p53 CDE Neg		CARS	ACTGGGGGGAATCTTCATCT	0	0	p53 CDE Neg
CARS	GTCTACCAGTTTCACCACTG	44	225.548	p53 CDE Neg		CARS	GTCTACCAGTTTCACCACTG	64	245.471	p53 CDE Neg		CARS	GTCTACCAGTTTCACCACTG	160	446.663	p53 CDE Neg		CARS	GTCTACCAGTTTCACCACTG	47	188.258	p53 CDE Neg		CARS	GTCTACCAGTTTCACCACTG	82	222.304	p53 CDE Neg		CARS	GTCTACCAGTTTCACCACTG	12	69.6803	p53 CDE Neg		CARS	GTCTACCAGTTTCACCACTG	159	581.697	p53 CDE Neg		CARS	GTCTACCAGTTTCACCACTG	178	559.086	p53 CDE Neg
CARS	TACACCTTGCCCTTGAGCCG	30	153.783	p53 CDE Neg		CARS	TACACCTTGCCCTTGAGCCG	52	199.445	p53 CDE Neg		CARS	TACACCTTGCCCTTGAGCCG	154	429.913	p53 CDE Neg		CARS	TACACCTTGCCCTTGAGCCG	131	524.718	p53 CDE Neg		CARS	TACACCTTGCCCTTGAGCCG	153	414.786	p53 CDE Neg		CARS	TACACCTTGCCCTTGAGCCG	47	272.915	p53 CDE Neg		CARS	TACACCTTGCCCTTGAGCCG	27	98.7788	p53 CDE Neg		CARS	TACACCTTGCCCTTGAGCCG	62	194.738	p53 CDE Neg
CARS	TGACAAGAACATCTCACTGG	138	707.402	p53 CDE Neg		CARS	TGACAAGAACATCTCACTGG	122	467.93	p53 CDE Neg		CARS	TGACAAGAACATCTCACTGG	117	326.622	p53 CDE Neg		CARS	TGACAAGAACATCTCACTGG	159	636.871	p53 CDE Neg		CARS	TGACAAGAACATCTCACTGG	202	547.626	p53 CDE Neg		CARS	TGACAAGAACATCTCACTGG	84	487.762	p53 CDE Neg		CARS	TGACAAGAACATCTCACTGG	45	164.631	p53 CDE Neg		CARS	TGACAAGAACATCTCACTGG	78	244.993	p53 CDE Neg
CARS	TGCAGCTCAGCGATGCCCTG	34	174.287	p53 CDE Neg		CARS	TGCAGCTCAGCGATGCCCTG	42	161.091	p53 CDE Neg		CARS	TGCAGCTCAGCGATGCCCTG	283	790.035	p53 CDE Neg		CARS	TGCAGCTCAGCGATGCCCTG	55	220.301	p53 CDE Neg		CARS	TGCAGCTCAGCGATGCCCTG	76	206.037	p53 CDE Neg		CARS	TGCAGCTCAGCGATGCCCTG	33	191.621	p53 CDE Neg		CARS	TGCAGCTCAGCGATGCCCTG	28	102.437	p53 CDE Neg		CARS	TGCAGCTCAGCGATGCCCTG	40	125.637	p53 CDE Neg
CARS	TGCAGCTGTGAGAATCCAAG	29	148.657	p53 CDE Neg		CARS	TGCAGCTGTGAGAATCCAAG	77	295.333	p53 CDE Neg		CARS	TGCAGCTGTGAGAATCCAAG	35	97.7075	p53 CDE Neg		CARS	TGCAGCTGTGAGAATCCAAG	10	40.0548	p53 CDE Neg		CARS	TGCAGCTGTGAGAATCCAAG	73	197.904	p53 CDE Neg		CARS	TGCAGCTGTGAGAATCCAAG	26	150.974	p53 CDE Neg		CARS	TGCAGCTGTGAGAATCCAAG	3	10.9754	p53 CDE Neg		CARS	TGCAGCTGTGAGAATCCAAG	7	21.9865	p53 CDE Neg
CARS	TTCTGACAAGAACATCTCAC	14	71.7654	p53 CDE Neg		CARS	TTCTGACAAGAACATCTCAC	31	118.9	p53 CDE Neg		CARS	TTCTGACAAGAACATCTCAC	30	83.7493	p53 CDE Neg		CARS	TTCTGACAAGAACATCTCAC	27	108.148	p53 CDE Neg		CARS	TTCTGACAAGAACATCTCAC	42	113.863	p53 CDE Neg		CARS	TTCTGACAAGAACATCTCAC	29	168.394	p53 CDE Neg		CARS	TTCTGACAAGAACATCTCAC	3	10.9754	p53 CDE Neg		CARS	TTCTGACAAGAACATCTCAC	8	25.1274	p53 CDE Neg
CCDC102B	AAGCTGAAAATACCTCGGAG	24	123.026	p53 CDE Neutral		CCDC102B	AAGCTGAAAATACCTCGGAG	35	134.242	p53 CDE Neutral		CCDC102B	AAGCTGAAAATACCTCGGAG	47	131.207	p53 CDE Neutral		CCDC102B	AAGCTGAAAATACCTCGGAG	5	20.0274	p53 CDE Neutral		CCDC102B	AAGCTGAAAATACCTCGGAG	31	84.0416	p53 CDE Neutral		CCDC102B	AAGCTGAAAATACCTCGGAG	23	133.554	p53 CDE Neutral		CCDC102B	AAGCTGAAAATACCTCGGAG	0	0	p53 CDE Neutral		CCDC102B	AAGCTGAAAATACCTCGGAG	4	12.5637	p53 CDE Neutral
CCDC102B	AGAAATAGAGAGACTGGAGT	38	194.792	p53 CDE Neutral		CCDC102B	AGAAATAGAGAGACTGGAGT	76	291.497	p53 CDE Neutral		CCDC102B	AGAAATAGAGAGACTGGAGT	75	209.373	p53 CDE Neutral		CCDC102B	AGAAATAGAGAGACTGGAGT	34	136.186	p53 CDE Neutral		CCDC102B	AGAAATAGAGAGACTGGAGT	53	143.684	p53 CDE Neutral		CCDC102B	AGAAATAGAGAGACTGGAGT	49	284.528	p53 CDE Neutral		CCDC102B	AGAAATAGAGAGACTGGAGT	652	2385.33	p53 CDE Neutral		CCDC102B	AGAAATAGAGAGACTGGAGT	507	1592.45	p53 CDE Neutral
CCDC102B	AGCTGAAAGGAACAGTGCCA	80	410.088	p53 CDE Neutral		CCDC102B	AGCTGAAAGGAACAGTGCCA	80	306.839	p53 CDE Neutral		CCDC102B	AGCTGAAAGGAACAGTGCCA	144	401.997	p53 CDE Neutral		CCDC102B	AGCTGAAAGGAACAGTGCCA	47	188.258	p53 CDE Neutral		CCDC102B	AGCTGAAAGGAACAGTGCCA	124	336.166	p53 CDE Neutral		CCDC102B	AGCTGAAAGGAACAGTGCCA	61	354.208	p53 CDE Neutral		CCDC102B	AGCTGAAAGGAACAGTGCCA	181	662.184	p53 CDE Neutral		CCDC102B	AGCTGAAAGGAACAGTGCCA	83	260.697	p53 CDE Neutral
CCDC102B	ATACCTCGGAGTGGGACAAG	98	502.358	p53 CDE Neutral		CCDC102B	ATACCTCGGAGTGGGACAAG	134	513.955	p53 CDE Neutral		CCDC102B	ATACCTCGGAGTGGGACAAG	266	742.577	p53 CDE Neutral		CCDC102B	ATACCTCGGAGTGGGACAAG	159	636.871	p53 CDE Neutral		CCDC102B	ATACCTCGGAGTGGGACAAG	192	520.516	p53 CDE Neutral		CCDC102B	ATACCTCGGAGTGGGACAAG	95	551.636	p53 CDE Neutral		CCDC102B	ATACCTCGGAGTGGGACAAG	134	490.236	p53 CDE Neutral		CCDC102B	ATACCTCGGAGTGGGACAAG	62	194.738	p53 CDE Neutral
CCDC102B	ATTGCAAGCTGAAAATACCT	42	215.296	p53 CDE Neutral		CCDC102B	ATTGCAAGCTGAAAATACCT	60	230.129	p53 CDE Neutral		CCDC102B	ATTGCAAGCTGAAAATACCT	126	351.747	p53 CDE Neutral		CCDC102B	ATTGCAAGCTGAAAATACCT	139	556.762	p53 CDE Neutral		CCDC102B	ATTGCAAGCTGAAAATACCT	91	246.703	p53 CDE Neutral		CCDC102B	ATTGCAAGCTGAAAATACCT	36	209.041	p53 CDE Neutral		CCDC102B	ATTGCAAGCTGAAAATACCT	48	175.607	p53 CDE Neutral		CCDC102B	ATTGCAAGCTGAAAATACCT	55	172.751	p53 CDE Neutral
CCDC102B	GCAGTCCGACCACCACCGCA	53	271.683	p53 CDE Neutral		CCDC102B	GCAGTCCGACCACCACCGCA	37	141.913	p53 CDE Neutral		CCDC102B	GCAGTCCGACCACCACCGCA	13	36.2914	p53 CDE Neutral		CCDC102B	GCAGTCCGACCACCACCGCA	4	16.0219	p53 CDE Neutral		CCDC102B	GCAGTCCGACCACCACCGCA	53	143.684	p53 CDE Neutral		CCDC102B	GCAGTCCGACCACCACCGCA	27	156.781	p53 CDE Neutral		CCDC102B	GCAGTCCGACCACCACCGCA	0	0	p53 CDE Neutral		CCDC102B	GCAGTCCGACCACCACCGCA	10	31.4093	p53 CDE Neutral
CCDC102B	GGTATTACAGGTATCCCTGG	14	71.7654	p53 CDE Neutral		CCDC102B	GGTATTACAGGTATCCCTGG	51	195.61	p53 CDE Neutral		CCDC102B	GGTATTACAGGTATCCCTGG	87	242.873	p53 CDE Neutral		CCDC102B	GGTATTACAGGTATCCCTGG	25	100.137	p53 CDE Neutral		CCDC102B	GGTATTACAGGTATCCCTGG	74	200.615	p53 CDE Neutral		CCDC102B	GGTATTACAGGTATCCCTGG	35	203.234	p53 CDE Neutral		CCDC102B	GGTATTACAGGTATCCCTGG	13	47.5602	p53 CDE Neutral		CCDC102B	GGTATTACAGGTATCCCTGG	14	43.973	p53 CDE Neutral
CCDC102B	GTATTACAGGTATCCCTGGG	98	502.358	p53 CDE Neutral		CCDC102B	GTATTACAGGTATCCCTGGG	76	291.497	p53 CDE Neutral		CCDC102B	GTATTACAGGTATCCCTGGG	196	547.162	p53 CDE Neutral		CCDC102B	GTATTACAGGTATCCCTGGG	126	504.69	p53 CDE Neutral		CCDC102B	GTATTACAGGTATCCCTGGG	174	471.717	p53 CDE Neutral		CCDC102B	GTATTACAGGTATCCCTGGG	69	400.662	p53 CDE Neutral		CCDC102B	GTATTACAGGTATCCCTGGG	29	106.096	p53 CDE Neutral		CCDC102B	GTATTACAGGTATCCCTGGG	51	160.187	p53 CDE Neutral
CCDC102B	GTTGATTTATTCAACAATGG	35	179.414	p53 CDE Neutral		CCDC102B	GTTGATTTATTCAACAATGG	63	241.636	p53 CDE Neutral		CCDC102B	GTTGATTTATTCAACAATGG	61	170.29	p53 CDE Neutral		CCDC102B	GTTGATTTATTCAACAATGG	16	64.0877	p53 CDE Neutral		CCDC102B	GTTGATTTATTCAACAATGG	88	238.57	p53 CDE Neutral		CCDC102B	GTTGATTTATTCAACAATGG	35	203.234	p53 CDE Neutral		CCDC102B	GTTGATTTATTCAACAATGG	11	40.2432	p53 CDE Neutral		CCDC102B	GTTGATTTATTCAACAATGG	4	12.5637	p53 CDE Neutral
CCDC102B	TGATTCTCTAAAATTAAGTG	37	189.666	p53 CDE Neutral		CCDC102B	TGATTCTCTAAAATTAAGTG	27	103.558	p53 CDE Neutral		CCDC102B	TGATTCTCTAAAATTAAGTG	17	47.4579	p53 CDE Neutral		CCDC102B	TGATTCTCTAAAATTAAGTG	14	56.0767	p53 CDE Neutral		CCDC102B	TGATTCTCTAAAATTAAGTG	42	113.863	p53 CDE Neutral		CCDC102B	TGATTCTCTAAAATTAAGTG	20	116.134	p53 CDE Neutral		CCDC102B	TGATTCTCTAAAATTAAGTG	0	0	p53 CDE Neutral		CCDC102B	TGATTCTCTAAAATTAAGTG	0	0	p53 CDE Neutral
CCDC167	AGTTGGAGGCTTTGTTCATT	32	164.035	p53 CDE Neg		CCDC167	AGTTGGAGGCTTTGTTCATT	30	115.065	p53 CDE Neg		CCDC167	AGTTGGAGGCTTTGTTCATT	104	290.331	p53 CDE Neg		CCDC167	AGTTGGAGGCTTTGTTCATT	49	196.268	p53 CDE Neg		CCDC167	AGTTGGAGGCTTTGTTCATT	33	89.4636	p53 CDE Neg		CCDC167	AGTTGGAGGCTTTGTTCATT	17	98.7138	p53 CDE Neg		CCDC167	AGTTGGAGGCTTTGTTCATT	30	109.754	p53 CDE Neg		CCDC167	AGTTGGAGGCTTTGTTCATT	25	78.5233	p53 CDE Neg
CCDC167	CCAGTGTCGGAGAGACCTGG	0	0	p53 CDE Neg		CCDC167	CCAGTGTCGGAGAGACCTGG	0	0	p53 CDE Neg		CCDC167	CCAGTGTCGGAGAGACCTGG	0	0	p53 CDE Neg		CCDC167	CCAGTGTCGGAGAGACCTGG	0	0	p53 CDE Neg		CCDC167	CCAGTGTCGGAGAGACCTGG	0	0	p53 CDE Neg		CCDC167	CCAGTGTCGGAGAGACCTGG	0	0	p53 CDE Neg		CCDC167	CCAGTGTCGGAGAGACCTGG	0	0	p53 CDE Neg		CCDC167	CCAGTGTCGGAGAGACCTGG	0	0	p53 CDE Neg
CCDC167	CCAGTGTCGGAGAGACCTGG	0	0	p53 CDE Neg		CCDC167	CCAGTGTCGGAGAGACCTGG	0	0	p53 CDE Neg		CCDC167	CCAGTGTCGGAGAGACCTGG	0	0	p53 CDE Neg		CCDC167	CCAGTGTCGGAGAGACCTGG	0	0	p53 CDE Neg		CCDC167	CCAGTGTCGGAGAGACCTGG	0	0	p53 CDE Neg		CCDC167	CCAGTGTCGGAGAGACCTGG	0	0	p53 CDE Neg		CCDC167	CCAGTGTCGGAGAGACCTGG	0	0	p53 CDE Neg		CCDC167	CCAGTGTCGGAGAGACCTGG	0	0	p53 CDE Neg
CCDC167	GGCCTTTGTTTCAGATCGAT	58	297.314	p53 CDE Neg		CCDC167	GGCCTTTGTTTCAGATCGAT	77	295.333	p53 CDE Neg		CCDC167	GGCCTTTGTTTCAGATCGAT	155	432.705	p53 CDE Neg		CCDC167	GGCCTTTGTTTCAGATCGAT	87	348.477	p53 CDE Neg		CCDC167	GGCCTTTGTTTCAGATCGAT	233	631.667	p53 CDE Neg		CCDC167	GGCCTTTGTTTCAGATCGAT	40	232.268	p53 CDE Neg		CCDC167	GGCCTTTGTTTCAGATCGAT	31	113.413	p53 CDE Neg		CCDC167	GGCCTTTGTTTCAGATCGAT	35	109.933	p53 CDE Neg
CCDC167	GGCTGTTTTTCTCCTTCTCC	0	0	p53 CDE Neg		CCDC167	GGCTGTTTTTCTCCTTCTCC	0	0	p53 CDE Neg		CCDC167	GGCTGTTTTTCTCCTTCTCC	0	0	p53 CDE Neg		CCDC167	GGCTGTTTTTCTCCTTCTCC	0	0	p53 CDE Neg		CCDC167	GGCTGTTTTTCTCCTTCTCC	0	0	p53 CDE Neg		CCDC167	GGCTGTTTTTCTCCTTCTCC	0	0	p53 CDE Neg		CCDC167	GGCTGTTTTTCTCCTTCTCC	0	0	p53 CDE Neg		CCDC167	GGCTGTTTTTCTCCTTCTCC	0	0	p53 CDE Neg
CCDC167	GTAACATGACTAAAAAGAAG	44	225.548	p53 CDE Neg		CCDC167	GTAACATGACTAAAAAGAAG	44	168.761	p53 CDE Neg		CCDC167	GTAACATGACTAAAAAGAAG	5	13.9582	p53 CDE Neg		CCDC167	GTAACATGACTAAAAAGAAG	65	260.356	p53 CDE Neg		CCDC167	GTAACATGACTAAAAAGAAG	61	165.372	p53 CDE Neg		CCDC167	GTAACATGACTAAAAAGAAG	35	203.234	p53 CDE Neg		CCDC167	GTAACATGACTAAAAAGAAG	337	1232.91	p53 CDE Neg		CCDC167	GTAACATGACTAAAAAGAAG	160	502.549	p53 CDE Neg
CCDC167	GTCCCAGTGTCGGAGAGACC	41	210.17	p53 CDE Neg		CCDC167	GTCCCAGTGTCGGAGAGACC	55	210.952	p53 CDE Neg		CCDC167	GTCCCAGTGTCGGAGAGACC	157	438.288	p53 CDE Neg		CCDC167	GTCCCAGTGTCGGAGAGACC	91	364.499	p53 CDE Neg		CCDC167	GTCCCAGTGTCGGAGAGACC	107	290.079	p53 CDE Neg		CCDC167	GTCCCAGTGTCGGAGAGACC	91	528.409	p53 CDE Neg		CCDC167	GTCCCAGTGTCGGAGAGACC	135	493.894	p53 CDE Neg		CCDC167	GTCCCAGTGTCGGAGAGACC	263	826.065	p53 CDE Neg
CCDC167	TAAAAAGAAGCGGGAGAATC	20	102.522	p53 CDE Neg		CCDC167	TAAAAAGAAGCGGGAGAATC	34	130.407	p53 CDE Neg		CCDC167	TAAAAAGAAGCGGGAGAATC	56	156.332	p53 CDE Neg		CCDC167	TAAAAAGAAGCGGGAGAATC	34	136.186	p53 CDE Neg		CCDC167	TAAAAAGAAGCGGGAGAATC	40	108.441	p53 CDE Neg		CCDC167	TAAAAAGAAGCGGGAGAATC	10	58.067	p53 CDE Neg		CCDC167	TAAAAAGAAGCGGGAGAATC	0	0	p53 CDE Neg		CCDC167	TAAAAAGAAGCGGGAGAATC	0	0	p53 CDE Neg
CCDC167	TGAACTCCAGACTCCACAGC	0	0	p53 CDE Neg		CCDC167	TGAACTCCAGACTCCACAGC	0	0	p53 CDE Neg		CCDC167	TGAACTCCAGACTCCACAGC	0	0	p53 CDE Neg		CCDC167	TGAACTCCAGACTCCACAGC	0	0	p53 CDE Neg		CCDC167	TGAACTCCAGACTCCACAGC	0	0	p53 CDE Neg		CCDC167	TGAACTCCAGACTCCACAGC	0	0	p53 CDE Neg		CCDC167	TGAACTCCAGACTCCACAGC	0	0	p53 CDE Neg		CCDC167	TGAACTCCAGACTCCACAGC	0	0	p53 CDE Neg
CCDC167	TGAACTCCAGACTCCACAGC	0	0	p53 CDE Neg		CCDC167	TGAACTCCAGACTCCACAGC	0	0	p53 CDE Neg		CCDC167	TGAACTCCAGACTCCACAGC	0	0	p53 CDE Neg		CCDC167	TGAACTCCAGACTCCACAGC	0	0	p53 CDE Neg		CCDC167	TGAACTCCAGACTCCACAGC	0	0	p53 CDE Neg		CCDC167	TGAACTCCAGACTCCACAGC	0	0	p53 CDE Neg		CCDC167	TGAACTCCAGACTCCACAGC	0	0	p53 CDE Neg		CCDC167	TGAACTCCAGACTCCACAGC	0	0	p53 CDE Neg
CCDC178	AAAAATAAATGAATTGAATG	37	189.666	p53 CDE Neutral		CCDC178	AAAAATAAATGAATTGAATG	58	222.458	p53 CDE Neutral		CCDC178	AAAAATAAATGAATTGAATG	82	228.915	p53 CDE Neutral		CCDC178	AAAAATAAATGAATTGAATG	76	304.416	p53 CDE Neutral		CCDC178	AAAAATAAATGAATTGAATG	59	159.95	p53 CDE Neutral		CCDC178	AAAAATAAATGAATTGAATG	28	162.587	p53 CDE Neutral		CCDC178	AAAAATAAATGAATTGAATG	13	47.5602	p53 CDE Neutral		CCDC178	AAAAATAAATGAATTGAATG	8	25.1274	p53 CDE Neutral
CCDC178	AGATCTTATTAGAAGAAAGG	22	112.774	p53 CDE Neutral		CCDC178	AGATCTTATTAGAAGAAAGG	29	111.229	p53 CDE Neutral		CCDC178	AGATCTTATTAGAAGAAAGG	35	97.7075	p53 CDE Neutral		CCDC178	AGATCTTATTAGAAGAAAGG	23	92.126	p53 CDE Neutral		CCDC178	AGATCTTATTAGAAGAAAGG	49	132.84	p53 CDE Neutral		CCDC178	AGATCTTATTAGAAGAAAGG	40	232.268	p53 CDE Neutral		CCDC178	AGATCTTATTAGAAGAAAGG	4	14.6339	p53 CDE Neutral		CCDC178	AGATCTTATTAGAAGAAAGG	40	125.637	p53 CDE Neutral
CCDC178	AGGCTCTCAGAGAGAAGGCA	52	266.557	p53 CDE Neutral		CCDC178	AGGCTCTCAGAGAGAAGGCA	96	368.207	p53 CDE Neutral		CCDC178	AGGCTCTCAGAGAGAAGGCA	44	122.832	p53 CDE Neutral		CCDC178	AGGCTCTCAGAGAGAAGGCA	49	196.268	p53 CDE Neutral		CCDC178	AGGCTCTCAGAGAGAAGGCA	78	211.459	p53 CDE Neutral		CCDC178	AGGCTCTCAGAGAGAAGGCA	34	197.428	p53 CDE Neutral		CCDC178	AGGCTCTCAGAGAGAAGGCA	215	786.572	p53 CDE Neutral		CCDC178	AGGCTCTCAGAGAGAAGGCA	153	480.562	p53 CDE Neutral
CCDC178	CAGTTTCTATTAATGCATCA	96	492.106	p53 CDE Neutral		CCDC178	CAGTTTCTATTAATGCATCA	106	406.562	p53 CDE Neutral		CCDC178	CAGTTTCTATTAATGCATCA	95	265.206	p53 CDE Neutral		CCDC178	CAGTTTCTATTAATGCATCA	84	336.46	p53 CDE Neutral		CCDC178	CAGTTTCTATTAATGCATCA	201	544.915	p53 CDE Neutral		CCDC178	CAGTTTCTATTAATGCATCA	77	447.116	p53 CDE Neutral		CCDC178	CAGTTTCTATTAATGCATCA	22	80.4864	p53 CDE Neutral		CCDC178	CAGTTTCTATTAATGCATCA	27	84.8051	p53 CDE Neutral
CCDC178	CCAGCCTCATCTGGCTGAAG	33	169.161	p53 CDE Neutral		CCDC178	CCAGCCTCATCTGGCTGAAG	64	245.471	p53 CDE Neutral		CCDC178	CCAGCCTCATCTGGCTGAAG	157	438.288	p53 CDE Neutral		CCDC178	CCAGCCTCATCTGGCTGAAG	92	368.504	p53 CDE Neutral		CCDC178	CCAGCCTCATCTGGCTGAAG	85	230.437	p53 CDE Neutral		CCDC178	CCAGCCTCATCTGGCTGAAG	30	174.201	p53 CDE Neutral		CCDC178	CCAGCCTCATCTGGCTGAAG	21	76.828	p53 CDE Neutral		CCDC178	CCAGCCTCATCTGGCTGAAG	72	226.147	p53 CDE Neutral
CCDC178	GAAACTTCAAGAACTCCCAT	123	630.511	p53 CDE Neutral		CCDC178	GAAACTTCAAGAACTCCCAT	132	506.284	p53 CDE Neutral		CCDC178	GAAACTTCAAGAACTCCCAT	138	385.247	p53 CDE Neutral		CCDC178	GAAACTTCAAGAACTCCCAT	154	616.844	p53 CDE Neutral		CCDC178	GAAACTTCAAGAACTCCCAT	176	477.139	p53 CDE Neutral		CCDC178	GAAACTTCAAGAACTCCCAT	91	528.409	p53 CDE Neutral		CCDC178	GAAACTTCAAGAACTCCCAT	22	80.4864	p53 CDE Neutral		CCDC178	GAAACTTCAAGAACTCCCAT	140	439.73	p53 CDE Neutral
CCDC178	GCAGGAGCACTTCAAACTGG	53	271.683	p53 CDE Neutral		CCDC178	GCAGGAGCACTTCAAACTGG	95	364.371	p53 CDE Neutral		CCDC178	GCAGGAGCACTTCAAACTGG	125	348.955	p53 CDE Neutral		CCDC178	GCAGGAGCACTTCAAACTGG	64	256.351	p53 CDE Neutral		CCDC178	GCAGGAGCACTTCAAACTGG	130	352.432	p53 CDE Neutral		CCDC178	GCAGGAGCACTTCAAACTGG	52	301.948	p53 CDE Neutral		CCDC178	GCAGGAGCACTTCAAACTGG	71	259.752	p53 CDE Neutral		CCDC178	GCAGGAGCACTTCAAACTGG	85	266.979	p53 CDE Neutral
CCDC178	GTGATGTTATAGAATTACAA	35	179.414	p53 CDE Neutral		CCDC178	GTGATGTTATAGAATTACAA	53	203.281	p53 CDE Neutral		CCDC178	GTGATGTTATAGAATTACAA	96	267.998	p53 CDE Neutral		CCDC178	GTGATGTTATAGAATTACAA	73	292.4	p53 CDE Neutral		CCDC178	GTGATGTTATAGAATTACAA	70	189.771	p53 CDE Neutral		CCDC178	GTGATGTTATAGAATTACAA	32	185.814	p53 CDE Neutral		CCDC178	GTGATGTTATAGAATTACAA	14	51.2186	p53 CDE Neutral		CCDC178	GTGATGTTATAGAATTACAA	15	47.114	p53 CDE Neutral
CCDC178	TTAAAAGTCTAGAAACTGAC	18	92.2698	p53 CDE Neutral		CCDC178	TTAAAAGTCTAGAAACTGAC	28	107.394	p53 CDE Neutral		CCDC178	TTAAAAGTCTAGAAACTGAC	43	120.041	p53 CDE Neutral		CCDC178	TTAAAAGTCTAGAAACTGAC	77	308.422	p53 CDE Neutral		CCDC178	TTAAAAGTCTAGAAACTGAC	39	105.73	p53 CDE Neutral		CCDC178	TTAAAAGTCTAGAAACTGAC	12	69.6803	p53 CDE Neutral		CCDC178	TTAAAAGTCTAGAAACTGAC	14	51.2186	p53 CDE Neutral		CCDC178	TTAAAAGTCTAGAAACTGAC	9	28.2684	p53 CDE Neutral
CCDC178	TTACCTTTCTGCACAGCCAA	55	281.936	p53 CDE Neutral		CCDC178	TTACCTTTCTGCACAGCCAA	50	191.774	p53 CDE Neutral		CCDC178	TTACCTTTCTGCACAGCCAA	35	97.7075	p53 CDE Neutral		CCDC178	TTACCTTTCTGCACAGCCAA	19	76.1041	p53 CDE Neutral		CCDC178	TTACCTTTCTGCACAGCCAA	94	254.836	p53 CDE Neutral		CCDC178	TTACCTTTCTGCACAGCCAA	57	330.982	p53 CDE Neutral		CCDC178	TTACCTTTCTGCACAGCCAA	12	43.9017	p53 CDE Neutral		CCDC178	TTACCTTTCTGCACAGCCAA	22	69.1005	p53 CDE Neutral
CCDC51	AAAGTGTTCATGGTGGCTCG	25	128.153	p53 CDE Neg		CCDC51	AAAGTGTTCATGGTGGCTCG	45	172.597	p53 CDE Neg		CCDC51	AAAGTGTTCATGGTGGCTCG	49	136.791	p53 CDE Neg		CCDC51	AAAGTGTTCATGGTGGCTCG	23	92.126	p53 CDE Neg		CCDC51	AAAGTGTTCATGGTGGCTCG	42	113.863	p53 CDE Neg		CCDC51	AAAGTGTTCATGGTGGCTCG	34	197.428	p53 CDE Neg		CCDC51	AAAGTGTTCATGGTGGCTCG	56	204.875	p53 CDE Neg		CCDC51	AAAGTGTTCATGGTGGCTCG	52	163.328	p53 CDE Neg
CCDC51	AACTGGCTACTCTCGAGCAC	58	297.314	p53 CDE Neg		CCDC51	AACTGGCTACTCTCGAGCAC	52	199.445	p53 CDE Neg		CCDC51	AACTGGCTACTCTCGAGCAC	34	94.9159	p53 CDE Neg		CCDC51	AACTGGCTACTCTCGAGCAC	99	396.542	p53 CDE Neg		CCDC51	AACTGGCTACTCTCGAGCAC	104	281.946	p53 CDE Neg		CCDC51	AACTGGCTACTCTCGAGCAC	57	330.982	p53 CDE Neg		CCDC51	AACTGGCTACTCTCGAGCAC	0	0	p53 CDE Neg		CCDC51	AACTGGCTACTCTCGAGCAC	19	59.6777	p53 CDE Neg
CCDC51	AGAGTCTTCTGCACGCAGAT	64	328.071	p53 CDE Neg		CCDC51	AGAGTCTTCTGCACGCAGAT	26	99.7227	p53 CDE Neg		CCDC51	AGAGTCTTCTGCACGCAGAT	21	58.6245	p53 CDE Neg		CCDC51	AGAGTCTTCTGCACGCAGAT	4	16.0219	p53 CDE Neg		CCDC51	AGAGTCTTCTGCACGCAGAT	47	127.418	p53 CDE Neg		CCDC51	AGAGTCTTCTGCACGCAGAT	37	214.848	p53 CDE Neg		CCDC51	AGAGTCTTCTGCACGCAGAT	233	852.424	p53 CDE Neg		CCDC51	AGAGTCTTCTGCACGCAGAT	64	201.02	p53 CDE Neg
CCDC51	AGAGTTTGTTGGACTCAACG	65	333.197	p53 CDE Neg		CCDC51	AGAGTTTGTTGGACTCAACG	48	184.103	p53 CDE Neg		CCDC51	AGAGTTTGTTGGACTCAACG	114	318.247	p53 CDE Neg		CCDC51	AGAGTTTGTTGGACTCAACG	46	184.252	p53 CDE Neg		CCDC51	AGAGTTTGTTGGACTCAACG	111	300.923	p53 CDE Neg		CCDC51	AGAGTTTGTTGGACTCAACG	61	354.208	p53 CDE Neg		CCDC51	AGAGTTTGTTGGACTCAACG	79	289.019	p53 CDE Neg		CCDC51	AGAGTTTGTTGGACTCAACG	42	131.919	p53 CDE Neg
CCDC51	GCCCGGAGAGAAAAGACCTG	13	66.6393	p53 CDE Neg		CCDC51	GCCCGGAGAGAAAAGACCTG	17	65.2033	p53 CDE Neg		CCDC51	GCCCGGAGAGAAAAGACCTG	5	13.9582	p53 CDE Neg		CCDC51	GCCCGGAGAGAAAAGACCTG	2	8.01096	p53 CDE Neg		CCDC51	GCCCGGAGAGAAAAGACCTG	22	59.6424	p53 CDE Neg		CCDC51	GCCCGGAGAGAAAAGACCTG	0	0	p53 CDE Neg		CCDC51	GCCCGGAGAGAAAAGACCTG	0	0	p53 CDE Neg		CCDC51	GCCCGGAGAGAAAAGACCTG	0	0	p53 CDE Neg
CCDC51	GCTGAAGGCTTTACTCCTGG	14	71.7654	p53 CDE Neg		CCDC51	GCTGAAGGCTTTACTCCTGG	18	69.0388	p53 CDE Neg		CCDC51	GCTGAAGGCTTTACTCCTGG	2	5.58329	p53 CDE Neg		CCDC51	GCTGAAGGCTTTACTCCTGG	0	0	p53 CDE Neg		CCDC51	GCTGAAGGCTTTACTCCTGG	23	62.3534	p53 CDE Neg		CCDC51	GCTGAAGGCTTTACTCCTGG	23	133.554	p53 CDE Neg		CCDC51	GCTGAAGGCTTTACTCCTGG	0	0	p53 CDE Neg		CCDC51	GCTGAAGGCTTTACTCCTGG	11	34.5502	p53 CDE Neg
CCDC51	GGAGGACTTGGAAGTTCACC	50	256.305	p53 CDE Neg		CCDC51	GGAGGACTTGGAAGTTCACC	55	210.952	p53 CDE Neg		CCDC51	GGAGGACTTGGAAGTTCACC	67	187.04	p53 CDE Neg		CCDC51	GGAGGACTTGGAAGTTCACC	64	256.351	p53 CDE Neg		CCDC51	GGAGGACTTGGAAGTTCACC	110	298.212	p53 CDE Neg		CCDC51	GGAGGACTTGGAAGTTCACC	64	371.628	p53 CDE Neg		CCDC51	GGAGGACTTGGAAGTTCACC	2	7.31695	p53 CDE Neg		CCDC51	GGAGGACTTGGAAGTTCACC	0	0	p53 CDE Neg
CCDC51	TCATGAGAAGGAGCGCACAA	82	420.34	p53 CDE Neg		CCDC51	TCATGAGAAGGAGCGCACAA	167	640.527	p53 CDE Neg		CCDC51	TCATGAGAAGGAGCGCACAA	208	580.662	p53 CDE Neg		CCDC51	TCATGAGAAGGAGCGCACAA	96	384.526	p53 CDE Neg		CCDC51	TCATGAGAAGGAGCGCACAA	214	580.158	p53 CDE Neg		CCDC51	TCATGAGAAGGAGCGCACAA	57	330.982	p53 CDE Neg		CCDC51	TCATGAGAAGGAGCGCACAA	255	932.911	p53 CDE Neg		CCDC51	TCATGAGAAGGAGCGCACAA	287	901.447	p53 CDE Neg
CCDC51	TGAAGAGGTCCCTTCCAAGG	54	276.81	p53 CDE Neg		CCDC51	TGAAGAGGTCCCTTCCAAGG	69	264.649	p53 CDE Neg		CCDC51	TGAAGAGGTCCCTTCCAAGG	102	284.748	p53 CDE Neg		CCDC51	TGAAGAGGTCCCTTCCAAGG	16	64.0877	p53 CDE Neg		CCDC51	TGAAGAGGTCCCTTCCAAGG	90	243.992	p53 CDE Neg		CCDC51	TGAAGAGGTCCCTTCCAAGG	29	168.394	p53 CDE Neg		CCDC51	TGAAGAGGTCCCTTCCAAGG	44	160.973	p53 CDE Neg		CCDC51	TGAAGAGGTCCCTTCCAAGG	25	78.5233	p53 CDE Neg
CCDC51	TTACTCCTGGAGGCGCAGAA	48	246.053	p53 CDE Neg		CCDC51	TTACTCCTGGAGGCGCAGAA	59	226.294	p53 CDE Neg		CCDC51	TTACTCCTGGAGGCGCAGAA	36	100.499	p53 CDE Neg		CCDC51	TTACTCCTGGAGGCGCAGAA	104	416.57	p53 CDE Neg		CCDC51	TTACTCCTGGAGGCGCAGAA	111	300.923	p53 CDE Neg		CCDC51	TTACTCCTGGAGGCGCAGAA	59	342.595	p53 CDE Neg		CCDC51	TTACTCCTGGAGGCGCAGAA	68	248.776	p53 CDE Neg		CCDC51	TTACTCCTGGAGGCGCAGAA	143	449.153	p53 CDE Neg
CCDC6	AAGAGAACTTGAGGCTCCAG	47	240.927	p53 CDE Neg		CCDC6	AAGAGAACTTGAGGCTCCAG	75	287.662	p53 CDE Neg		CCDC6	AAGAGAACTTGAGGCTCCAG	110	307.081	p53 CDE Neg		CCDC6	AAGAGAACTTGAGGCTCCAG	24	96.1315	p53 CDE Neg		CCDC6	AAGAGAACTTGAGGCTCCAG	109	295.501	p53 CDE Neg		CCDC6	AAGAGAACTTGAGGCTCCAG	52	301.948	p53 CDE Neg		CCDC6	AAGAGAACTTGAGGCTCCAG	62	226.825	p53 CDE Neg		CCDC6	AAGAGAACTTGAGGCTCCAG	96	301.529	p53 CDE Neg
CCDC6	ATAAGCTTGAAGCTGAAAAG	47	240.927	p53 CDE Neg		CCDC6	ATAAGCTTGAAGCTGAAAAG	72	276.155	p53 CDE Neg		CCDC6	ATAAGCTTGAAGCTGAAAAG	91	254.04	p53 CDE Neg		CCDC6	ATAAGCTTGAAGCTGAAAAG	35	140.192	p53 CDE Neg		CCDC6	ATAAGCTTGAAGCTGAAAAG	115	311.767	p53 CDE Neg		CCDC6	ATAAGCTTGAAGCTGAAAAG	37	214.848	p53 CDE Neg		CCDC6	ATAAGCTTGAAGCTGAAAAG	170	621.941	p53 CDE Neg		CCDC6	ATAAGCTTGAAGCTGAAAAG	129	405.18	p53 CDE Neg
CCDC6	ATCGGGCTGGACACAGTGCG	57	292.188	p53 CDE Neg		CCDC6	ATCGGGCTGGACACAGTGCG	61	233.965	p53 CDE Neg		CCDC6	ATCGGGCTGGACACAGTGCG	122	340.58	p53 CDE Neg		CCDC6	ATCGGGCTGGACACAGTGCG	52	208.285	p53 CDE Neg		CCDC6	ATCGGGCTGGACACAGTGCG	92	249.414	p53 CDE Neg		CCDC6	ATCGGGCTGGACACAGTGCG	49	284.528	p53 CDE Neg		CCDC6	ATCGGGCTGGACACAGTGCG	230	841.449	p53 CDE Neg		CCDC6	ATCGGGCTGGACACAGTGCG	153	480.562	p53 CDE Neg
CCDC6	CTTGCTGCAGCGAGGCCAGG	43	220.422	p53 CDE Neg		CCDC6	CTTGCTGCAGCGAGGCCAGG	102	391.22	p53 CDE Neg		CCDC6	CTTGCTGCAGCGAGGCCAGG	92	256.831	p53 CDE Neg		CCDC6	CTTGCTGCAGCGAGGCCAGG	63	252.345	p53 CDE Neg		CCDC6	CTTGCTGCAGCGAGGCCAGG	161	436.474	p53 CDE Neg		CCDC6	CTTGCTGCAGCGAGGCCAGG	79	458.729	p53 CDE Neg		CCDC6	CTTGCTGCAGCGAGGCCAGG	272	995.105	p53 CDE Neg		CCDC6	CTTGCTGCAGCGAGGCCAGG	525	1648.99	p53 CDE Neg
CCDC6	GAGATATCTCTAGGCGATGG	46	235.801	p53 CDE Neg		CCDC6	GAGATATCTCTAGGCGATGG	106	406.562	p53 CDE Neg		CCDC6	GAGATATCTCTAGGCGATGG	121	337.789	p53 CDE Neg		CCDC6	GAGATATCTCTAGGCGATGG	109	436.597	p53 CDE Neg		CCDC6	GAGATATCTCTAGGCGATGG	137	371.41	p53 CDE Neg		CCDC6	GAGATATCTCTAGGCGATGG	47	272.915	p53 CDE Neg		CCDC6	GAGATATCTCTAGGCGATGG	324	1185.35	p53 CDE Neg		CCDC6	GAGATATCTCTAGGCGATGG	190	596.777	p53 CDE Neg
CCDC6	GCTCTAGTCAGTGAAGTTGG	106	543.367	p53 CDE Neg		CCDC6	GCTCTAGTCAGTGAAGTTGG	129	494.778	p53 CDE Neg		CCDC6	GCTCTAGTCAGTGAAGTTGG	143	399.205	p53 CDE Neg		CCDC6	GCTCTAGTCAGTGAAGTTGG	174	696.953	p53 CDE Neg		CCDC6	GCTCTAGTCAGTGAAGTTGG	167	452.74	p53 CDE Neg		CCDC6	GCTCTAGTCAGTGAAGTTGG	69	400.662	p53 CDE Neg		CCDC6	GCTCTAGTCAGTGAAGTTGG	106	387.798	p53 CDE Neg		CCDC6	GCTCTAGTCAGTGAAGTTGG	130	408.321	p53 CDE Neg
CCDC6	GGTTGGTGAGCTCCTCCAGG	47	240.927	p53 CDE Neg		CCDC6	GGTTGGTGAGCTCCTCCAGG	74	283.826	p53 CDE Neg		CCDC6	GGTTGGTGAGCTCCTCCAGG	108	301.497	p53 CDE Neg		CCDC6	GGTTGGTGAGCTCCTCCAGG	20	80.1096	p53 CDE Neg		CCDC6	GGTTGGTGAGCTCCTCCAGG	102	276.524	p53 CDE Neg		CCDC6	GGTTGGTGAGCTCCTCCAGG	68	394.855	p53 CDE Neg		CCDC6	GGTTGGTGAGCTCCTCCAGG	68	248.776	p53 CDE Neg		CCDC6	GGTTGGTGAGCTCCTCCAGG	66	207.301	p53 CDE Neg
CCDC6	TCTATCATATGCAAGTCACA	21	107.648	p53 CDE Neg		CCDC6	TCTATCATATGCAAGTCACA	35	134.242	p53 CDE Neg		CCDC6	TCTATCATATGCAAGTCACA	21	58.6245	p53 CDE Neg		CCDC6	TCTATCATATGCAAGTCACA	31	124.17	p53 CDE Neg		CCDC6	TCTATCATATGCAAGTCACA	49	132.84	p53 CDE Neg		CCDC6	TCTATCATATGCAAGTCACA	32	185.814	p53 CDE Neg		CCDC6	TCTATCATATGCAAGTCACA	64	234.142	p53 CDE Neg		CCDC6	TCTATCATATGCAAGTCACA	68	213.583	p53 CDE Neg
CCDC6	TCTCGGAGAGCTGTCGACAG	5	25.6305	p53 CDE Neg		CCDC6	TCTCGGAGAGCTGTCGACAG	2	7.67098	p53 CDE Neg		CCDC6	TCTCGGAGAGCTGTCGACAG	4	11.1666	p53 CDE Neg		CCDC6	TCTCGGAGAGCTGTCGACAG	4	16.0219	p53 CDE Neg		CCDC6	TCTCGGAGAGCTGTCGACAG	2	5.42204	p53 CDE Neg		CCDC6	TCTCGGAGAGCTGTCGACAG	8	46.4536	p53 CDE Neg		CCDC6	TCTCGGAGAGCTGTCGACAG	0	0	p53 CDE Neg		CCDC6	TCTCGGAGAGCTGTCGACAG	0	0	p53 CDE Neg
CCDC6	TTTCTCATAATTTACAGCAA	143	733.033	p53 CDE Neg		CCDC6	TTTCTCATAATTTACAGCAA	232	889.833	p53 CDE Neg		CCDC6	TTTCTCATAATTTACAGCAA	422	1178.07	p53 CDE Neg		CCDC6	TTTCTCATAATTTACAGCAA	250	1001.37	p53 CDE Neg		CCDC6	TTTCTCATAATTTACAGCAA	336	910.902	p53 CDE Neg		CCDC6	TTTCTCATAATTTACAGCAA	147	853.584	p53 CDE Neg		CCDC6	TTTCTCATAATTTACAGCAA	196	717.061	p53 CDE Neg		CCDC6	TTTCTCATAATTTACAGCAA	225	706.709	p53 CDE Neg
CCNB1	AACTATGTTGGACTATGACA	64	328.071	p53 CDE Neg		CCNB1	AACTATGTTGGACTATGACA	60	230.129	p53 CDE Neg		CCNB1	AACTATGTTGGACTATGACA	52	145.165	p53 CDE Neg		CCNB1	AACTATGTTGGACTATGACA	48	192.263	p53 CDE Neg		CCNB1	AACTATGTTGGACTATGACA	87	235.859	p53 CDE Neg		CCNB1	AACTATGTTGGACTATGACA	40	232.268	p53 CDE Neg		CCNB1	AACTATGTTGGACTATGACA	31	113.413	p53 CDE Neg		CCNB1	AACTATGTTGGACTATGACA	69	216.724	p53 CDE Neg
CCNB1	AATGGAGACAGTCATGTACA	46	235.801	p53 CDE Neg		CCNB1	AATGGAGACAGTCATGTACA	83	318.346	p53 CDE Neg		CCNB1	AATGGAGACAGTCATGTACA	275	767.702	p53 CDE Neg		CCNB1	AATGGAGACAGTCATGTACA	183	733.003	p53 CDE Neg		CCNB1	AATGGAGACAGTCATGTACA	117	317.189	p53 CDE Neg		CCNB1	AATGGAGACAGTCATGTACA	41	238.074	p53 CDE Neg		CCNB1	AATGGAGACAGTCATGTACA	107	391.457	p53 CDE Neg		CCNB1	AATGGAGACAGTCATGTACA	41	128.778	p53 CDE Neg
CCNB1	CAATCTTAGATGCTCTCCGA	14	71.7654	p53 CDE Neg		CCNB1	CAATCTTAGATGCTCTCCGA	38	145.749	p53 CDE Neg		CCNB1	CAATCTTAGATGCTCTCCGA	39	108.874	p53 CDE Neg		CCNB1	CAATCTTAGATGCTCTCCGA	14	56.0767	p53 CDE Neg		CCNB1	CAATCTTAGATGCTCTCCGA	94	254.836	p53 CDE Neg		CCNB1	CAATCTTAGATGCTCTCCGA	45	261.301	p53 CDE Neg		CCNB1	CAATCTTAGATGCTCTCCGA	2	7.31695	p53 CDE Neg		CCNB1	CAATCTTAGATGCTCTCCGA	0	0	p53 CDE Neg
CCNB1	CCACAGCCCTCCCAGCCGCA	36	184.54	p53 CDE Neg		CCNB1	CCACAGCCCTCCCAGCCGCA	75	287.662	p53 CDE Neg		CCNB1	CCACAGCCCTCCCAGCCGCA	144	401.997	p53 CDE Neg		CCNB1	CCACAGCCCTCCCAGCCGCA	21	84.1151	p53 CDE Neg		CCNB1	CCACAGCCCTCCCAGCCGCA	95	257.547	p53 CDE Neg		CCNB1	CCACAGCCCTCCCAGCCGCA	33	191.621	p53 CDE Neg		CCNB1	CCACAGCCCTCCCAGCCGCA	20	73.1695	p53 CDE Neg		CCNB1	CCACAGCCCTCCCAGCCGCA	48	150.765	p53 CDE Neg
CCNB1	CCATGTCTCGAATCAACTTG	48	246.053	p53 CDE Neg		CCNB1	CCATGTCTCGAATCAACTTG	35	134.242	p53 CDE Neg		CCNB1	CCATGTCTCGAATCAACTTG	77	214.957	p53 CDE Neg		CCNB1	CCATGTCTCGAATCAACTTG	99	396.542	p53 CDE Neg		CCNB1	CCATGTCTCGAATCAACTTG	63	170.794	p53 CDE Neg		CCNB1	CCATGTCTCGAATCAACTTG	65	377.435	p53 CDE Neg		CCNB1	CCATGTCTCGAATCAACTTG	64	234.142	p53 CDE Neg		CCNB1	CCATGTCTCGAATCAACTTG	91	285.825	p53 CDE Neg
CCNB1	CCTGGCTAAGAATGTAGTCA	29	148.657	p53 CDE Neg		CCNB1	CCTGGCTAAGAATGTAGTCA	29	111.229	p53 CDE Neg		CCNB1	CCTGGCTAAGAATGTAGTCA	10	27.9164	p53 CDE Neg		CCNB1	CCTGGCTAAGAATGTAGTCA	17	68.0932	p53 CDE Neg		CCNB1	CCTGGCTAAGAATGTAGTCA	33	89.4636	p53 CDE Neg		CCNB1	CCTGGCTAAGAATGTAGTCA	19	110.327	p53 CDE Neg		CCNB1	CCTGGCTAAGAATGTAGTCA	20	73.1695	p53 CDE Neg		CCNB1	CCTGGCTAAGAATGTAGTCA	24	75.3823	p53 CDE Neg
CCNB1	CGAAGGAAGTGCAAAGGTAG	66	338.323	p53 CDE Neg		CCNB1	CGAAGGAAGTGCAAAGGTAG	87	333.687	p53 CDE Neg		CCNB1	CGAAGGAAGTGCAAAGGTAG	147	410.372	p53 CDE Neg		CCNB1	CGAAGGAAGTGCAAAGGTAG	136	544.745	p53 CDE Neg		CCNB1	CGAAGGAAGTGCAAAGGTAG	110	298.212	p53 CDE Neg		CCNB1	CGAAGGAAGTGCAAAGGTAG	61	354.208	p53 CDE Neg		CCNB1	CGAAGGAAGTGCAAAGGTAG	20	73.1695	p53 CDE Neg		CCNB1	CGAAGGAAGTGCAAAGGTAG	181	568.508	p53 CDE Neg
CCNB1	GCTCTCCGAAGGAAGTGCAA	31	158.909	p53 CDE Neg		CCNB1	GCTCTCCGAAGGAAGTGCAA	21	80.5453	p53 CDE Neg		CCNB1	GCTCTCCGAAGGAAGTGCAA	100	279.164	p53 CDE Neg		CCNB1	GCTCTCCGAAGGAAGTGCAA	61	244.334	p53 CDE Neg		CCNB1	GCTCTCCGAAGGAAGTGCAA	46	124.707	p53 CDE Neg		CCNB1	GCTCTCCGAAGGAAGTGCAA	15	87.1004	p53 CDE Neg		CCNB1	GCTCTCCGAAGGAAGTGCAA	135	493.894	p53 CDE Neg		CCNB1	GCTCTCCGAAGGAAGTGCAA	435	1366.3	p53 CDE Neg
CCNB1	TAGTCTCCTGGAAGAAACCG	42	215.296	p53 CDE Neg		CCNB1	TAGTCTCCTGGAAGAAACCG	52	199.445	p53 CDE Neg		CCNB1	TAGTCTCCTGGAAGAAACCG	86	240.081	p53 CDE Neg		CCNB1	TAGTCTCCTGGAAGAAACCG	90	360.493	p53 CDE Neg		CCNB1	TAGTCTCCTGGAAGAAACCG	55	149.106	p53 CDE Neg		CCNB1	TAGTCTCCTGGAAGAAACCG	33	191.621	p53 CDE Neg		CCNB1	TAGTCTCCTGGAAGAAACCG	4	14.6339	p53 CDE Neg		CCNB1	TAGTCTCCTGGAAGAAACCG	0	0	p53 CDE Neg
CCNT1	ACTTTCTTATCGCCAGCAGG	100	512.61	p53 CDE Pos		CCNT1	ACTTTCTTATCGCCAGCAGG	165	632.856	p53 CDE Pos		CCNT1	ACTTTCTTATCGCCAGCAGG	216	602.995	p53 CDE Pos		CCNT1	ACTTTCTTATCGCCAGCAGG	205	821.123	p53 CDE Pos		CCNT1	ACTTTCTTATCGCCAGCAGG	162	439.185	p53 CDE Pos		CCNT1	ACTTTCTTATCGCCAGCAGG	64	371.628	p53 CDE Pos		CCNT1	ACTTTCTTATCGCCAGCAGG	32	117.071	p53 CDE Pos		CCNT1	ACTTTCTTATCGCCAGCAGG	49	153.906	p53 CDE Pos
CCNT1	AGAGGAAGAACAACAACAAA	10	51.261	p53 CDE Pos		CCNT1	AGAGGAAGAACAACAACAAA	18	69.0388	p53 CDE Pos		CCNT1	AGAGGAAGAACAACAACAAA	23	64.2078	p53 CDE Pos		CCNT1	AGAGGAAGAACAACAACAAA	30	120.164	p53 CDE Pos		CCNT1	AGAGGAAGAACAACAACAAA	19	51.5094	p53 CDE Pos		CCNT1	AGAGGAAGAACAACAACAAA	35	203.234	p53 CDE Pos		CCNT1	AGAGGAAGAACAACAACAAA	1	3.65847	p53 CDE Pos		CCNT1	AGAGGAAGAACAACAACAAA	0	0	p53 CDE Pos
CCNT1	CACTTTACTACATGAGTATG	83	425.466	p53 CDE Pos		CCNT1	CACTTTACTACATGAGTATG	149	571.488	p53 CDE Pos		CCNT1	CACTTTACTACATGAGTATG	112	312.664	p53 CDE Pos		CCNT1	CACTTTACTACATGAGTATG	126	504.69	p53 CDE Pos		CCNT1	CACTTTACTACATGAGTATG	134	363.277	p53 CDE Pos		CCNT1	CACTTTACTACATGAGTATG	95	551.636	p53 CDE Pos		CCNT1	CACTTTACTACATGAGTATG	173	632.916	p53 CDE Pos		CCNT1	CACTTTACTACATGAGTATG	266	835.487	p53 CDE Pos
CCNT1	CACTTTAGCTGCTAGAAACA	25	128.153	p53 CDE Pos		CCNT1	CACTTTAGCTGCTAGAAACA	67	256.978	p53 CDE Pos		CCNT1	CACTTTAGCTGCTAGAAACA	30	83.7493	p53 CDE Pos		CCNT1	CACTTTAGCTGCTAGAAACA	20	80.1096	p53 CDE Pos		CCNT1	CACTTTAGCTGCTAGAAACA	101	273.813	p53 CDE Pos		CCNT1	CACTTTAGCTGCTAGAAACA	40	232.268	p53 CDE Pos		CCNT1	CACTTTAGCTGCTAGAAACA	104	380.481	p53 CDE Pos		CCNT1	CACTTTAGCTGCTAGAAACA	89	279.543	p53 CDE Pos
CCNT1	CCAACAGGCTCAAACGCATT	45	230.675	p53 CDE Pos		CCNT1	CCAACAGGCTCAAACGCATT	38	145.749	p53 CDE Pos		CCNT1	CCAACAGGCTCAAACGCATT	60	167.499	p53 CDE Pos		CCNT1	CCAACAGGCTCAAACGCATT	23	92.126	p53 CDE Pos		CCNT1	CCAACAGGCTCAAACGCATT	104	281.946	p53 CDE Pos		CCNT1	CCAACAGGCTCAAACGCATT	68	394.855	p53 CDE Pos		CCNT1	CCAACAGGCTCAAACGCATT	97	354.872	p53 CDE Pos		CCNT1	CCAACAGGCTCAAACGCATT	246	772.669	p53 CDE Pos
CCNT1	CCTCACTTCTAGTATCAGGA	58	297.314	p53 CDE Pos		CCNT1	CCTCACTTCTAGTATCAGGA	115	441.081	p53 CDE Pos		CCNT1	CCTCACTTCTAGTATCAGGA	122	340.58	p53 CDE Pos		CCNT1	CCTCACTTCTAGTATCAGGA	44	176.241	p53 CDE Pos		CCNT1	CCTCACTTCTAGTATCAGGA	160	433.763	p53 CDE Pos		CCNT1	CCTCACTTCTAGTATCAGGA	107	621.316	p53 CDE Pos		CCNT1	CCTCACTTCTAGTATCAGGA	78	285.361	p53 CDE Pos		CCNT1	CCTCACTTCTAGTATCAGGA	499	1567.32	p53 CDE Pos
CCNT1	GGAAGAACAACAACAAACGG	16	82.0176	p53 CDE Pos		CCNT1	GGAAGAACAACAACAAACGG	71	272.32	p53 CDE Pos		CCNT1	GGAAGAACAACAACAAACGG	123	343.372	p53 CDE Pos		CCNT1	GGAAGAACAACAACAAACGG	33	132.181	p53 CDE Pos		CCNT1	GGAAGAACAACAACAAACGG	78	211.459	p53 CDE Pos		CCNT1	GGAAGAACAACAACAAACGG	47	272.915	p53 CDE Pos		CCNT1	GGAAGAACAACAACAAACGG	1	3.65847	p53 CDE Pos		CCNT1	GGAAGAACAACAACAAACGG	0	0	p53 CDE Pos
CCNT1	GTTTCTAGCAGCTAAAGTGG	38	194.792	p53 CDE Pos		CCNT1	GTTTCTAGCAGCTAAAGTGG	43	164.926	p53 CDE Pos		CCNT1	GTTTCTAGCAGCTAAAGTGG	24	66.9994	p53 CDE Pos		CCNT1	GTTTCTAGCAGCTAAAGTGG	25	100.137	p53 CDE Pos		CCNT1	GTTTCTAGCAGCTAAAGTGG	35	94.8857	p53 CDE Pos		CCNT1	GTTTCTAGCAGCTAAAGTGG	15	87.1004	p53 CDE Pos		CCNT1	GTTTCTAGCAGCTAAAGTGG	8	29.2678	p53 CDE Pos		CCNT1	GTTTCTAGCAGCTAAAGTGG	4	12.5637	p53 CDE Pos
CCNT1	TCTGGTTGAAGCACTATGGA	36	184.54	p53 CDE Pos		CCNT1	TCTGGTTGAAGCACTATGGA	70	268.484	p53 CDE Pos		CCNT1	TCTGGTTGAAGCACTATGGA	17	47.4579	p53 CDE Pos		CCNT1	TCTGGTTGAAGCACTATGGA	21	84.1151	p53 CDE Pos		CCNT1	TCTGGTTGAAGCACTATGGA	71	192.482	p53 CDE Pos		CCNT1	TCTGGTTGAAGCACTATGGA	29	168.394	p53 CDE Pos		CCNT1	TCTGGTTGAAGCACTATGGA	124	453.651	p53 CDE Pos		CCNT1	TCTGGTTGAAGCACTATGGA	64	201.02	p53 CDE Pos
CCNT1	TTTTGGAGAAAACTCCCAAC	0	0	p53 CDE Pos		CCNT1	TTTTGGAGAAAACTCCCAAC	0	0	p53 CDE Pos		CCNT1	TTTTGGAGAAAACTCCCAAC	0	0	p53 CDE Pos		CCNT1	TTTTGGAGAAAACTCCCAAC	0	0	p53 CDE Pos		CCNT1	TTTTGGAGAAAACTCCCAAC	0	0	p53 CDE Pos		CCNT1	TTTTGGAGAAAACTCCCAAC	0	0	p53 CDE Pos		CCNT1	TTTTGGAGAAAACTCCCAAC	0	0	p53 CDE Pos		CCNT1	TTTTGGAGAAAACTCCCAAC	0	0	p53 CDE Pos
CCSAP	CCAAGTGCCTTATTTGCTAG	27	138.405	p53 CDE Neutral		CCSAP	CCAAGTGCCTTATTTGCTAG	36	138.078	p53 CDE Neutral		CCSAP	CCAAGTGCCTTATTTGCTAG	63	175.874	p53 CDE Neutral		CCSAP	CCAAGTGCCTTATTTGCTAG	34	136.186	p53 CDE Neutral		CCSAP	CCAAGTGCCTTATTTGCTAG	73	197.904	p53 CDE Neutral		CCSAP	CCAAGTGCCTTATTTGCTAG	32	185.814	p53 CDE Neutral		CCSAP	CCAAGTGCCTTATTTGCTAG	47	171.948	p53 CDE Neutral		CCSAP	CCAAGTGCCTTATTTGCTAG	84	263.838	p53 CDE Neutral
CCSAP	CGGACGGCACCATGTCCCCG	47	240.927	p53 CDE Neutral		CCSAP	CGGACGGCACCATGTCCCCG	38	145.749	p53 CDE Neutral		CCSAP	CGGACGGCACCATGTCCCCG	93	259.623	p53 CDE Neutral		CCSAP	CGGACGGCACCATGTCCCCG	30	120.164	p53 CDE Neutral		CCSAP	CGGACGGCACCATGTCCCCG	43	116.574	p53 CDE Neutral		CCSAP	CGGACGGCACCATGTCCCCG	35	203.234	p53 CDE Neutral		CCSAP	CGGACGGCACCATGTCCCCG	1	3.65847	p53 CDE Neutral		CCSAP	CGGACGGCACCATGTCCCCG	0	0	p53 CDE Neutral
CCSAP	CGTAGAGCCGGCGACCCAGG	49	251.179	p53 CDE Neutral		CCSAP	CGTAGAGCCGGCGACCCAGG	24	92.0517	p53 CDE Neutral		CCSAP	CGTAGAGCCGGCGACCCAGG	19	53.0412	p53 CDE Neutral		CCSAP	CGTAGAGCCGGCGACCCAGG	9	36.0493	p53 CDE Neutral		CCSAP	CGTAGAGCCGGCGACCCAGG	85	230.437	p53 CDE Neutral		CCSAP	CGTAGAGCCGGCGACCCAGG	22	127.747	p53 CDE Neutral		CCSAP	CGTAGAGCCGGCGACCCAGG	1	3.65847	p53 CDE Neutral		CCSAP	CGTAGAGCCGGCGACCCAGG	3	9.42279	p53 CDE Neutral
CCSAP	CTACCAGGAGCCGCGCTGGG	31	158.909	p53 CDE Neutral		CCSAP	CTACCAGGAGCCGCGCTGGG	15	57.5323	p53 CDE Neutral		CCSAP	CTACCAGGAGCCGCGCTGGG	56	156.332	p53 CDE Neutral		CCSAP	CTACCAGGAGCCGCGCTGGG	65	260.356	p53 CDE Neutral		CCSAP	CTACCAGGAGCCGCGCTGGG	50	135.551	p53 CDE Neutral		CCSAP	CTACCAGGAGCCGCGCTGGG	18	104.521	p53 CDE Neutral		CCSAP	CTACCAGGAGCCGCGCTGGG	0	0	p53 CDE Neutral		CCSAP	CTACCAGGAGCCGCGCTGGG	4	12.5637	p53 CDE Neutral
CCSAP	GCGCCTGCTCCAGCAGCCGG	0	0	p53 CDE Neutral		CCSAP	GCGCCTGCTCCAGCAGCCGG	12	46.0259	p53 CDE Neutral		CCSAP	GCGCCTGCTCCAGCAGCCGG	48	133.999	p53 CDE Neutral		CCSAP	GCGCCTGCTCCAGCAGCCGG	11	44.0603	p53 CDE Neutral		CCSAP	GCGCCTGCTCCAGCAGCCGG	13	35.2432	p53 CDE Neutral		CCSAP	GCGCCTGCTCCAGCAGCCGG	9	52.2603	p53 CDE Neutral		CCSAP	GCGCCTGCTCCAGCAGCCGG	0	0	p53 CDE Neutral		CCSAP	GCGCCTGCTCCAGCAGCCGG	0	0	p53 CDE Neutral
CCSAP	GCTCTTCACCCCGCTCCCCG	22	112.774	p53 CDE Neutral		CCSAP	GCTCTTCACCCCGCTCCCCG	37	141.913	p53 CDE Neutral		CCSAP	GCTCTTCACCCCGCTCCCCG	21	58.6245	p53 CDE Neutral		CCSAP	GCTCTTCACCCCGCTCCCCG	33	132.181	p53 CDE Neutral		CCSAP	GCTCTTCACCCCGCTCCCCG	42	113.863	p53 CDE Neutral		CCSAP	GCTCTTCACCCCGCTCCCCG	9	52.2603	p53 CDE Neutral		CCSAP	GCTCTTCACCCCGCTCCCCG	12	43.9017	p53 CDE Neutral		CCSAP	GCTCTTCACCCCGCTCCCCG	6	18.8456	p53 CDE Neutral
CCSAP	GGCCCGTACTCCTCCCAGCG	18	92.2698	p53 CDE Neutral		CCSAP	GGCCCGTACTCCTCCCAGCG	16	61.3678	p53 CDE Neutral		CCSAP	GGCCCGTACTCCTCCCAGCG	18	50.2496	p53 CDE Neutral		CCSAP	GGCCCGTACTCCTCCCAGCG	14	56.0767	p53 CDE Neutral		CCSAP	GGCCCGTACTCCTCCCAGCG	31	84.0416	p53 CDE Neutral		CCSAP	GGCCCGTACTCCTCCCAGCG	19	110.327	p53 CDE Neutral		CCSAP	GGCCCGTACTCCTCCCAGCG	18	65.8525	p53 CDE Neutral		CCSAP	GGCCCGTACTCCTCCCAGCG	158	496.267	p53 CDE Neutral
CCSAP	TGACGACGCCGAGTCCTCCG	81	415.214	p53 CDE Neutral		CCSAP	TGACGACGCCGAGTCCTCCG	79	303.004	p53 CDE Neutral		CCSAP	TGACGACGCCGAGTCCTCCG	82	228.915	p53 CDE Neutral		CCSAP	TGACGACGCCGAGTCCTCCG	37	148.203	p53 CDE Neutral		CCSAP	TGACGACGCCGAGTCCTCCG	91	246.703	p53 CDE Neutral		CCSAP	TGACGACGCCGAGTCCTCCG	56	325.175	p53 CDE Neutral		CCSAP	TGACGACGCCGAGTCCTCCG	160	585.356	p53 CDE Neutral		CCSAP	TGACGACGCCGAGTCCTCCG	40	125.637	p53 CDE Neutral
CCSAP	TGCTAGAGGAAACAGGAAAG	58	297.314	p53 CDE Neutral		CCSAP	TGCTAGAGGAAACAGGAAAG	73	279.991	p53 CDE Neutral		CCSAP	TGCTAGAGGAAACAGGAAAG	72	200.998	p53 CDE Neutral		CCSAP	TGCTAGAGGAAACAGGAAAG	55	220.301	p53 CDE Neutral		CCSAP	TGCTAGAGGAAACAGGAAAG	94	254.836	p53 CDE Neutral		CCSAP	TGCTAGAGGAAACAGGAAAG	38	220.654	p53 CDE Neutral		CCSAP	TGCTAGAGGAAACAGGAAAG	12	43.9017	p53 CDE Neutral		CCSAP	TGCTAGAGGAAACAGGAAAG	17	53.3958	p53 CDE Neutral
CCSAP	TTGCTGTCGAGGCTCAGTAC	19	97.3959	p53 CDE Neutral		CCSAP	TTGCTGTCGAGGCTCAGTAC	35	134.242	p53 CDE Neutral		CCSAP	TTGCTGTCGAGGCTCAGTAC	45	125.624	p53 CDE Neutral		CCSAP	TTGCTGTCGAGGCTCAGTAC	52	208.285	p53 CDE Neutral		CCSAP	TTGCTGTCGAGGCTCAGTAC	44	119.285	p53 CDE Neutral		CCSAP	TTGCTGTCGAGGCTCAGTAC	29	168.394	p53 CDE Neutral		CCSAP	TTGCTGTCGAGGCTCAGTAC	107	391.457	p53 CDE Neutral		CCSAP	TTGCTGTCGAGGCTCAGTAC	86	270.12	p53 CDE Neutral
CCSER2	GGATATGTTTGATTCCCCCA	10	51.261	p53 CDE Neg		CCSER2	GGATATGTTTGATTCCCCCA	51	195.61	p53 CDE Neg		CCSER2	GGATATGTTTGATTCCCCCA	30	83.7493	p53 CDE Neg		CCSER2	GGATATGTTTGATTCCCCCA	29	116.159	p53 CDE Neg		CCSER2	GGATATGTTTGATTCCCCCA	74	200.615	p53 CDE Neg		CCSER2	GGATATGTTTGATTCCCCCA	12	69.6803	p53 CDE Neg		CCSER2	GGATATGTTTGATTCCCCCA	61	223.167	p53 CDE Neg		CCSER2	GGATATGTTTGATTCCCCCA	39	122.496	p53 CDE Neg
CCSER2	GCTCTGATGGAACATACATG	42	215.296	p53 CDE Neg		CCSER2	GCTCTGATGGAACATACATG	36	138.078	p53 CDE Neg		CCSER2	GCTCTGATGGAACATACATG	48	133.999	p53 CDE Neg		CCSER2	GCTCTGATGGAACATACATG	23	92.126	p53 CDE Neg		CCSER2	GCTCTGATGGAACATACATG	74	200.615	p53 CDE Neg		CCSER2	GCTCTGATGGAACATACATG	36	209.041	p53 CDE Neg		CCSER2	GCTCTGATGGAACATACATG	60	219.508	p53 CDE Neg		CCSER2	GCTCTGATGGAACATACATG	35	109.933	p53 CDE Neg
CCSER2	GAAAAACGTGTTCCTACTCA	65	333.197	p53 CDE Neg		CCSER2	GAAAAACGTGTTCCTACTCA	89	341.358	p53 CDE Neg		CCSER2	GAAAAACGTGTTCCTACTCA	73	203.79	p53 CDE Neg		CCSER2	GAAAAACGTGTTCCTACTCA	71	284.389	p53 CDE Neg		CCSER2	GAAAAACGTGTTCCTACTCA	178	482.561	p53 CDE Neg		CCSER2	GAAAAACGTGTTCCTACTCA	106	615.51	p53 CDE Neg		CCSER2	GAAAAACGTGTTCCTACTCA	110	402.432	p53 CDE Neg		CCSER2	GAAAAACGTGTTCCTACTCA	303	951.702	p53 CDE Neg
CCSER2	GTTAGCATACTTGACCGTAG	26	133.279	p53 CDE Neg		CCSER2	GTTAGCATACTTGACCGTAG	56	214.787	p53 CDE Neg		CCSER2	GTTAGCATACTTGACCGTAG	29	80.9576	p53 CDE Neg		CCSER2	GTTAGCATACTTGACCGTAG	33	132.181	p53 CDE Neg		CCSER2	GTTAGCATACTTGACCGTAG	83	225.015	p53 CDE Neg		CCSER2	GTTAGCATACTTGACCGTAG	22	127.747	p53 CDE Neg		CCSER2	GTTAGCATACTTGACCGTAG	7	25.6093	p53 CDE Neg		CCSER2	GTTAGCATACTTGACCGTAG	9	28.2684	p53 CDE Neg
CCSER2	GATCAGCTGGTAGCATGCAA	53	271.683	p53 CDE Neg		CCSER2	GATCAGCTGGTAGCATGCAA	86	329.852	p53 CDE Neg		CCSER2	GATCAGCTGGTAGCATGCAA	48	133.999	p53 CDE Neg		CCSER2	GATCAGCTGGTAGCATGCAA	53	212.29	p53 CDE Neg		CCSER2	GATCAGCTGGTAGCATGCAA	107	290.079	p53 CDE Neg		CCSER2	GATCAGCTGGTAGCATGCAA	51	296.141	p53 CDE Neg		CCSER2	GATCAGCTGGTAGCATGCAA	365	1335.34	p53 CDE Neg		CCSER2	GATCAGCTGGTAGCATGCAA	260	816.642	p53 CDE Neg
CCSER2	CAGAACTAGAATAACTCCAG	33	169.161	p53 CDE Neg		CCSER2	CAGAACTAGAATAACTCCAG	51	195.61	p53 CDE Neg		CCSER2	CAGAACTAGAATAACTCCAG	53	147.957	p53 CDE Neg		CCSER2	CAGAACTAGAATAACTCCAG	44	176.241	p53 CDE Neg		CCSER2	CAGAACTAGAATAACTCCAG	67	181.638	p53 CDE Neg		CCSER2	CAGAACTAGAATAACTCCAG	19	110.327	p53 CDE Neg		CCSER2	CAGAACTAGAATAACTCCAG	47	171.948	p53 CDE Neg		CCSER2	CAGAACTAGAATAACTCCAG	60	188.456	p53 CDE Neg
CCSER2	CTAAAGTAGAAGTTACACCT	21	107.648	p53 CDE Neg		CCSER2	CTAAAGTAGAAGTTACACCT	65	249.307	p53 CDE Neg		CCSER2	CTAAAGTAGAAGTTACACCT	155	432.705	p53 CDE Neg		CCSER2	CTAAAGTAGAAGTTACACCT	55	220.301	p53 CDE Neg		CCSER2	CTAAAGTAGAAGTTACACCT	66	178.927	p53 CDE Neg		CCSER2	CTAAAGTAGAAGTTACACCT	33	191.621	p53 CDE Neg		CCSER2	CTAAAGTAGAAGTTACACCT	43	157.314	p53 CDE Neg		CCSER2	CTAAAGTAGAAGTTACACCT	70	219.865	p53 CDE Neg
CCSER2	GCACTCTAATGGATAGCTGT	43	220.422	p53 CDE Neg		CCSER2	GCACTCTAATGGATAGCTGT	56	214.787	p53 CDE Neg		CCSER2	GCACTCTAATGGATAGCTGT	95	265.206	p53 CDE Neg		CCSER2	GCACTCTAATGGATAGCTGT	75	300.411	p53 CDE Neg		CCSER2	GCACTCTAATGGATAGCTGT	66	178.927	p53 CDE Neg		CCSER2	GCACTCTAATGGATAGCTGT	60	348.402	p53 CDE Neg		CCSER2	GCACTCTAATGGATAGCTGT	44	160.973	p53 CDE Neg		CCSER2	GCACTCTAATGGATAGCTGT	41	128.778	p53 CDE Neg
CCSER2	GAGATACCTGAGTGATGATG	122	625.384	p53 CDE Neg		CCSER2	GAGATACCTGAGTGATGATG	134	513.955	p53 CDE Neg		CCSER2	GAGATACCTGAGTGATGATG	118	329.414	p53 CDE Neg		CCSER2	GAGATACCTGAGTGATGATG	186	745.019	p53 CDE Neg		CCSER2	GAGATACCTGAGTGATGATG	154	417.497	p53 CDE Neg		CCSER2	GAGATACCTGAGTGATGATG	86	499.376	p53 CDE Neg		CCSER2	GAGATACCTGAGTGATGATG	214	782.913	p53 CDE Neg		CCSER2	GAGATACCTGAGTGATGATG	84	263.838	p53 CDE Neg
CCSER2	AAAAGTTACATCAAAAATAA	64	328.071	p53 CDE Neg		CCSER2	AAAAGTTACATCAAAAATAA	103	395.055	p53 CDE Neg		CCSER2	AAAAGTTACATCAAAAATAA	144	401.997	p53 CDE Neg		CCSER2	AAAAGTTACATCAAAAATAA	38	152.208	p53 CDE Neg		CCSER2	AAAAGTTACATCAAAAATAA	121	328.033	p53 CDE Neg		CCSER2	AAAAGTTACATCAAAAATAA	72	418.082	p53 CDE Neg		CCSER2	AAAAGTTACATCAAAAATAA	58	212.191	p53 CDE Neg		CCSER2	AAAAGTTACATCAAAAATAA	416	1306.63	p53 CDE Neg
CD37	ACTTTGGACCAGATCTGCAG	22	112.774	p53 CDE Pos		CD37	ACTTTGGACCAGATCTGCAG	41	157.255	p53 CDE Pos		CD37	ACTTTGGACCAGATCTGCAG	58	161.915	p53 CDE Pos		CD37	ACTTTGGACCAGATCTGCAG	61	244.334	p53 CDE Pos		CD37	ACTTTGGACCAGATCTGCAG	46	124.707	p53 CDE Pos		CD37	ACTTTGGACCAGATCTGCAG	24	139.361	p53 CDE Pos		CD37	ACTTTGGACCAGATCTGCAG	7	25.6093	p53 CDE Pos		CD37	ACTTTGGACCAGATCTGCAG	17	53.3958	p53 CDE Pos
CD37	AGTGGAGATGAGGATTCCCA	67	343.449	p53 CDE Pos		CD37	AGTGGAGATGAGGATTCCCA	54	207.116	p53 CDE Pos		CD37	AGTGGAGATGAGGATTCCCA	76	212.165	p53 CDE Pos		CD37	AGTGGAGATGAGGATTCCCA	80	320.438	p53 CDE Pos		CD37	AGTGGAGATGAGGATTCCCA	83	225.015	p53 CDE Pos		CD37	AGTGGAGATGAGGATTCCCA	38	220.654	p53 CDE Pos		CD37	AGTGGAGATGAGGATTCCCA	26	95.1203	p53 CDE Pos		CD37	AGTGGAGATGAGGATTCCCA	59	185.315	p53 CDE Pos
CD37	CACCAACCCCGAGGAGACCG	11	56.3871	p53 CDE Pos		CD37	CACCAACCCCGAGGAGACCG	55	210.952	p53 CDE Pos		CD37	CACCAACCCCGAGGAGACCG	82	228.915	p53 CDE Pos		CD37	CACCAACCCCGAGGAGACCG	31	124.17	p53 CDE Pos		CD37	CACCAACCCCGAGGAGACCG	52	140.973	p53 CDE Pos		CD37	CACCAACCCCGAGGAGACCG	12	69.6803	p53 CDE Pos		CD37	CACCAACCCCGAGGAGACCG	11	40.2432	p53 CDE Pos		CD37	CACCAACCCCGAGGAGACCG	0	0	p53 CDE Pos
CD37	CCTCGGCCGCGGTCTCCTCG	10	51.261	p53 CDE Pos		CD37	CCTCGGCCGCGGTCTCCTCG	16	61.3678	p53 CDE Pos		CD37	CCTCGGCCGCGGTCTCCTCG	32	89.3326	p53 CDE Pos		CD37	CCTCGGCCGCGGTCTCCTCG	9	36.0493	p53 CDE Pos		CD37	CCTCGGCCGCGGTCTCCTCG	20	54.2204	p53 CDE Pos		CD37	CCTCGGCCGCGGTCTCCTCG	11	63.8736	p53 CDE Pos		CD37	CCTCGGCCGCGGTCTCCTCG	0	0	p53 CDE Pos		CD37	CCTCGGCCGCGGTCTCCTCG	0	0	p53 CDE Pos
CD37	CGAAGAGGAAGTACTTGATG	33	169.161	p53 CDE Pos		CD37	CGAAGAGGAAGTACTTGATG	33	126.571	p53 CDE Pos		CD37	CGAAGAGGAAGTACTTGATG	96	267.998	p53 CDE Pos		CD37	CGAAGAGGAAGTACTTGATG	37	148.203	p53 CDE Pos		CD37	CGAAGAGGAAGTACTTGATG	32	86.7526	p53 CDE Pos		CD37	CGAAGAGGAAGTACTTGATG	42	243.881	p53 CDE Pos		CD37	CGAAGAGGAAGTACTTGATG	5	18.2924	p53 CDE Pos		CD37	CGAAGAGGAAGTACTTGATG	69	216.724	p53 CDE Pos
CD37	CGAAGCTGGTCTTGTCAATG	25	128.153	p53 CDE Pos		CD37	CGAAGCTGGTCTTGTCAATG	38	145.749	p53 CDE Pos		CD37	CGAAGCTGGTCTTGTCAATG	115	321.039	p53 CDE Pos		CD37	CGAAGCTGGTCTTGTCAATG	56	224.307	p53 CDE Pos		CD37	CGAAGCTGGTCTTGTCAATG	75	203.326	p53 CDE Pos		CD37	CGAAGCTGGTCTTGTCAATG	36	209.041	p53 CDE Pos		CD37	CGAAGCTGGTCTTGTCAATG	23	84.1449	p53 CDE Pos		CD37	CGAAGCTGGTCTTGTCAATG	4	12.5637	p53 CDE Pos
CD37	GAATCCTCATCTCCACTCAG	30	153.783	p53 CDE Pos		CD37	GAATCCTCATCTCCACTCAG	63	241.636	p53 CDE Pos		CD37	GAATCCTCATCTCCACTCAG	26	72.5827	p53 CDE Pos		CD37	GAATCCTCATCTCCACTCAG	31	124.17	p53 CDE Pos		CD37	GAATCCTCATCTCCACTCAG	83	225.015	p53 CDE Pos		CD37	GAATCCTCATCTCCACTCAG	45	261.301	p53 CDE Pos		CD37	GAATCCTCATCTCCACTCAG	29	106.096	p53 CDE Pos		CD37	GAATCCTCATCTCCACTCAG	72	226.147	p53 CDE Pos
CD37	GATTCCCAGGGTGATCTGTG	32	164.035	p53 CDE Pos		CD37	GATTCCCAGGGTGATCTGTG	35	134.242	p53 CDE Pos		CD37	GATTCCCAGGGTGATCTGTG	74	206.582	p53 CDE Pos		CD37	GATTCCCAGGGTGATCTGTG	83	332.455	p53 CDE Pos		CD37	GATTCCCAGGGTGATCTGTG	78	211.459	p53 CDE Pos		CD37	GATTCCCAGGGTGATCTGTG	58	336.788	p53 CDE Pos		CD37	GATTCCCAGGGTGATCTGTG	33	120.73	p53 CDE Pos		CD37	GATTCCCAGGGTGATCTGTG	11	34.5502	p53 CDE Pos
CD37	GGGCCCCCACACAACCCAGG	16	82.0176	p53 CDE Pos		CD37	GGGCCCCCACACAACCCAGG	49	187.939	p53 CDE Pos		CD37	GGGCCCCCACACAACCCAGG	2	5.58329	p53 CDE Pos		CD37	GGGCCCCCACACAACCCAGG	6	24.0329	p53 CDE Pos		CD37	GGGCCCCCACACAACCCAGG	26	70.4865	p53 CDE Pos		CD37	GGGCCCCCACACAACCCAGG	18	104.521	p53 CDE Pos		CD37	GGGCCCCCACACAACCCAGG	14	51.2186	p53 CDE Pos		CD37	GGGCCCCCACACAACCCAGG	3	9.42279	p53 CDE Pos
CD37	GTCCCAGCTCTCCTCGGCCG	27	138.405	p53 CDE Pos		CD37	GTCCCAGCTCTCCTCGGCCG	52	199.445	p53 CDE Pos		CD37	GTCCCAGCTCTCCTCGGCCG	21	58.6245	p53 CDE Pos		CD37	GTCCCAGCTCTCCTCGGCCG	31	124.17	p53 CDE Pos		CD37	GTCCCAGCTCTCCTCGGCCG	37	100.308	p53 CDE Pos		CD37	GTCCCAGCTCTCCTCGGCCG	13	75.487	p53 CDE Pos		CD37	GTCCCAGCTCTCCTCGGCCG	7	25.6093	p53 CDE Pos		CD37	GTCCCAGCTCTCCTCGGCCG	2	6.28186	p53 CDE Pos
CD79A	AATGTGAACAAGAGCCATGG	73	374.205	p53 CDE Neutral		CD79A	AATGTGAACAAGAGCCATGG	63	241.636	p53 CDE Neutral		CD79A	AATGTGAACAAGAGCCATGG	175	488.538	p53 CDE Neutral		CD79A	AATGTGAACAAGAGCCATGG	107	428.586	p53 CDE Neutral		CD79A	AATGTGAACAAGAGCCATGG	132	357.854	p53 CDE Neutral		CD79A	AATGTGAACAAGAGCCATGG	73	423.889	p53 CDE Neutral		CD79A	AATGTGAACAAGAGCCATGG	30	109.754	p53 CDE Neutral		CD79A	AATGTGAACAAGAGCCATGG	31	97.3688	p53 CDE Neutral
CD79A	ACAACGCCAACGTCACCTGG	0	0	p53 CDE Neutral		CD79A	ACAACGCCAACGTCACCTGG	0	0	p53 CDE Neutral		CD79A	ACAACGCCAACGTCACCTGG	0	0	p53 CDE Neutral		CD79A	ACAACGCCAACGTCACCTGG	0	0	p53 CDE Neutral		CD79A	ACAACGCCAACGTCACCTGG	0	0	p53 CDE Neutral		CD79A	ACAACGCCAACGTCACCTGG	0	0	p53 CDE Neutral		CD79A	ACAACGCCAACGTCACCTGG	0	0	p53 CDE Neutral		CD79A	ACAACGCCAACGTCACCTGG	0	0	p53 CDE Neutral
CD79A	ACAACGCCAACGTCACCTGG	0	0	p53 CDE Neutral		CD79A	ACAACGCCAACGTCACCTGG	0	0	p53 CDE Neutral		CD79A	ACAACGCCAACGTCACCTGG	0	0	p53 CDE Neutral		CD79A	ACAACGCCAACGTCACCTGG	0	0	p53 CDE Neutral		CD79A	ACAACGCCAACGTCACCTGG	0	0	p53 CDE Neutral		CD79A	ACAACGCCAACGTCACCTGG	0	0	p53 CDE Neutral		CD79A	ACAACGCCAACGTCACCTGG	0	0	p53 CDE Neutral		CD79A	ACAACGCCAACGTCACCTGG	0	0	p53 CDE Neutral
CD79A	CGATGGCAGAACGAGAAGCT	14	71.7654	p53 CDE Neutral		CD79A	CGATGGCAGAACGAGAAGCT	39	149.584	p53 CDE Neutral		CD79A	CGATGGCAGAACGAGAAGCT	22	61.4161	p53 CDE Neutral		CD79A	CGATGGCAGAACGAGAAGCT	52	208.285	p53 CDE Neutral		CD79A	CGATGGCAGAACGAGAAGCT	36	97.5967	p53 CDE Neutral		CD79A	CGATGGCAGAACGAGAAGCT	26	150.974	p53 CDE Neutral		CD79A	CGATGGCAGAACGAGAAGCT	0	0	p53 CDE Neutral		CD79A	CGATGGCAGAACGAGAAGCT	10	31.4093	p53 CDE Neutral
CD79A	GAGAAGCTCGGGTTGGATGC	32	164.035	p53 CDE Neutral		CD79A	GAGAAGCTCGGGTTGGATGC	35	134.242	p53 CDE Neutral		CD79A	GAGAAGCTCGGGTTGGATGC	71	198.207	p53 CDE Neutral		CD79A	GAGAAGCTCGGGTTGGATGC	31	124.17	p53 CDE Neutral		CD79A	GAGAAGCTCGGGTTGGATGC	55	149.106	p53 CDE Neutral		CD79A	GAGAAGCTCGGGTTGGATGC	21	121.941	p53 CDE Neutral		CD79A	GAGAAGCTCGGGTTGGATGC	10	36.5847	p53 CDE Neutral		CD79A	GAGAAGCTCGGGTTGGATGC	0	0	p53 CDE Neutral
CD79A	GAGTCATACCAGCAGTCCTG	82	420.34	p53 CDE Neutral		CD79A	GAGTCATACCAGCAGTCCTG	99	379.713	p53 CDE Neutral		CD79A	GAGTCATACCAGCAGTCCTG	218	608.578	p53 CDE Neutral		CD79A	GAGTCATACCAGCAGTCCTG	181	724.992	p53 CDE Neutral		CD79A	GAGTCATACCAGCAGTCCTG	177	479.85	p53 CDE Neutral		CD79A	GAGTCATACCAGCAGTCCTG	76	441.309	p53 CDE Neutral		CD79A	GAGTCATACCAGCAGTCCTG	8	29.2678	p53 CDE Neutral		CD79A	GAGTCATACCAGCAGTCCTG	33	103.651	p53 CDE Neutral
CD79A	GCATCATTGATGGTGAGCCT	109	558.745	p53 CDE Neutral		CD79A	GCATCATTGATGGTGAGCCT	142	544.639	p53 CDE Neutral		CD79A	GCATCATTGATGGTGAGCCT	431	1203.2	p53 CDE Neutral		CD79A	GCATCATTGATGGTGAGCCT	312	1249.71	p53 CDE Neutral		CD79A	GCATCATTGATGGTGAGCCT	108	292.79	p53 CDE Neutral		CD79A	GCATCATTGATGGTGAGCCT	62	360.015	p53 CDE Neutral		CD79A	GCATCATTGATGGTGAGCCT	47	171.948	p53 CDE Neutral		CD79A	GCATCATTGATGGTGAGCCT	47	147.624	p53 CDE Neutral
CD79A	GCGTTGTTGCTGCTATTGTG	78	399.836	p53 CDE Neutral		CD79A	GCGTTGTTGCTGCTATTGTG	68	260.813	p53 CDE Neutral		CD79A	GCGTTGTTGCTGCTATTGTG	62	173.082	p53 CDE Neutral		CD79A	GCGTTGTTGCTGCTATTGTG	52	208.285	p53 CDE Neutral		CD79A	GCGTTGTTGCTGCTATTGTG	123	333.455	p53 CDE Neutral		CD79A	GCGTTGTTGCTGCTATTGTG	51	296.141	p53 CDE Neutral		CD79A	GCGTTGTTGCTGCTATTGTG	192	702.427	p53 CDE Neutral		CD79A	GCGTTGTTGCTGCTATTGTG	265	832.347	p53 CDE Neutral
CD79A	TGGGACCTTGTGCATCCACA	44	225.548	p53 CDE Neutral		CD79A	TGGGACCTTGTGCATCCACA	61	233.965	p53 CDE Neutral		CD79A	TGGGACCTTGTGCATCCACA	84	234.498	p53 CDE Neutral		CD79A	TGGGACCTTGTGCATCCACA	66	264.362	p53 CDE Neutral		CD79A	TGGGACCTTGTGCATCCACA	129	349.721	p53 CDE Neutral		CD79A	TGGGACCTTGTGCATCCACA	54	313.562	p53 CDE Neutral		CD79A	TGGGACCTTGTGCATCCACA	158	578.039	p53 CDE Neutral		CD79A	TGGGACCTTGTGCATCCACA	336	1055.35	p53 CDE Neutral
CD79A	TTCATCTTCATATTCATCCC	59	302.44	p53 CDE Neutral		CD79A	TTCATCTTCATATTCATCCC	85	326.017	p53 CDE Neutral		CD79A	TTCATCTTCATATTCATCCC	92	256.831	p53 CDE Neutral		CD79A	TTCATCTTCATATTCATCCC	67	268.367	p53 CDE Neutral		CD79A	TTCATCTTCATATTCATCCC	120	325.322	p53 CDE Neutral		CD79A	TTCATCTTCATATTCATCCC	41	238.074	p53 CDE Neutral		CD79A	TTCATCTTCATATTCATCCC	82	299.995	p53 CDE Neutral		CD79A	TTCATCTTCATATTCATCCC	105	329.798	p53 CDE Neutral
CDC42BPA	AAGAGTCTGAATCCATTCCA	75	384.458	p53 CDE Neutral		CDC42BPA	AAGAGTCTGAATCCATTCCA	97	372.042	p53 CDE Neutral		CDC42BPA	AAGAGTCTGAATCCATTCCA	220	614.161	p53 CDE Neutral		CDC42BPA	AAGAGTCTGAATCCATTCCA	96	384.526	p53 CDE Neutral		CDC42BPA	AAGAGTCTGAATCCATTCCA	110	298.212	p53 CDE Neutral		CDC42BPA	AAGAGTCTGAATCCATTCCA	86	499.376	p53 CDE Neutral		CDC42BPA	AAGAGTCTGAATCCATTCCA	360	1317.05	p53 CDE Neutral		CDC42BPA	AAGAGTCTGAATCCATTCCA	527	1655.27	p53 CDE Neutral
CDC42BPA	GAGGAAGCTACAGTGCCAAG	90	461.349	p53 CDE Neutral		CDC42BPA	GAGGAAGCTACAGTGCCAAG	82	314.51	p53 CDE Neutral		CDC42BPA	GAGGAAGCTACAGTGCCAAG	68	189.832	p53 CDE Neutral		CDC42BPA	GAGGAAGCTACAGTGCCAAG	78	312.427	p53 CDE Neutral		CDC42BPA	GAGGAAGCTACAGTGCCAAG	82	222.304	p53 CDE Neutral		CDC42BPA	GAGGAAGCTACAGTGCCAAG	56	325.175	p53 CDE Neutral		CDC42BPA	GAGGAAGCTACAGTGCCAAG	64	234.142	p53 CDE Neutral		CDC42BPA	GAGGAAGCTACAGTGCCAAG	134	420.885	p53 CDE Neutral
CDC42BPA	GCGATGAAAAGGATGCACGA	42	215.296	p53 CDE Neutral		CDC42BPA	GCGATGAAAAGGATGCACGA	69	264.649	p53 CDE Neutral		CDC42BPA	GCGATGAAAAGGATGCACGA	142	396.413	p53 CDE Neutral		CDC42BPA	GCGATGAAAAGGATGCACGA	100	400.548	p53 CDE Neutral		CDC42BPA	GCGATGAAAAGGATGCACGA	73	197.904	p53 CDE Neutral		CDC42BPA	GCGATGAAAAGGATGCACGA	31	180.008	p53 CDE Neutral		CDC42BPA	GCGATGAAAAGGATGCACGA	6	21.9508	p53 CDE Neutral		CDC42BPA	GCGATGAAAAGGATGCACGA	39	122.496	p53 CDE Neutral
CDC42BPA	GGAAATGCTGAAAAGAGCTG	73	374.205	p53 CDE Neutral		CDC42BPA	GGAAATGCTGAAAAGAGCTG	99	379.713	p53 CDE Neutral		CDC42BPA	GGAAATGCTGAAAAGAGCTG	242	675.578	p53 CDE Neutral		CDC42BPA	GGAAATGCTGAAAAGAGCTG	158	632.866	p53 CDE Neutral		CDC42BPA	GGAAATGCTGAAAAGAGCTG	162	439.185	p53 CDE Neutral		CDC42BPA	GGAAATGCTGAAAAGAGCTG	59	342.595	p53 CDE Neutral		CDC42BPA	GGAAATGCTGAAAAGAGCTG	184	673.159	p53 CDE Neutral		CDC42BPA	GGAAATGCTGAAAAGAGCTG	208	653.314	p53 CDE Neutral
CDC42BPA	GTATATGTAAAACCAACAAA	39	199.918	p53 CDE Neutral		CDC42BPA	GTATATGTAAAACCAACAAA	89	341.358	p53 CDE Neutral		CDC42BPA	GTATATGTAAAACCAACAAA	180	502.496	p53 CDE Neutral		CDC42BPA	GTATATGTAAAACCAACAAA	100	400.548	p53 CDE Neutral		CDC42BPA	GTATATGTAAAACCAACAAA	93	252.125	p53 CDE Neutral		CDC42BPA	GTATATGTAAAACCAACAAA	62	360.015	p53 CDE Neutral		CDC42BPA	GTATATGTAAAACCAACAAA	179	654.867	p53 CDE Neutral		CDC42BPA	GTATATGTAAAACCAACAAA	234	734.978	p53 CDE Neutral
CDC42BPA	TAATGCGCTGCCATTCTGTG	38	194.792	p53 CDE Neutral		CDC42BPA	TAATGCGCTGCCATTCTGTG	46	176.432	p53 CDE Neutral		CDC42BPA	TAATGCGCTGCCATTCTGTG	97	270.789	p53 CDE Neutral		CDC42BPA	TAATGCGCTGCCATTCTGTG	75	300.411	p53 CDE Neutral		CDC42BPA	TAATGCGCTGCCATTCTGTG	96	260.258	p53 CDE Neutral		CDC42BPA	TAATGCGCTGCCATTCTGTG	45	261.301	p53 CDE Neutral		CDC42BPA	TAATGCGCTGCCATTCTGTG	7	25.6093	p53 CDE Neutral		CDC42BPA	TAATGCGCTGCCATTCTGTG	16	50.2549	p53 CDE Neutral
CDC42BPA	TATCTTTGATGTGAACTCCA	28	143.531	p53 CDE Neutral		CDC42BPA	TATCTTTGATGTGAACTCCA	29	111.229	p53 CDE Neutral		CDC42BPA	TATCTTTGATGTGAACTCCA	23	64.2078	p53 CDE Neutral		CDC42BPA	TATCTTTGATGTGAACTCCA	6	24.0329	p53 CDE Neutral		CDC42BPA	TATCTTTGATGTGAACTCCA	46	124.707	p53 CDE Neutral		CDC42BPA	TATCTTTGATGTGAACTCCA	10	58.067	p53 CDE Neutral		CDC42BPA	TATCTTTGATGTGAACTCCA	0	0	p53 CDE Neutral		CDC42BPA	TATCTTTGATGTGAACTCCA	13	40.8321	p53 CDE Neutral
CDC42BPA	TCCTTGGTCCATGCCTCCAG	77	394.71	p53 CDE Neutral		CDC42BPA	TCCTTGGTCCATGCCTCCAG	94	360.536	p53 CDE Neutral		CDC42BPA	TCCTTGGTCCATGCCTCCAG	120	334.997	p53 CDE Neutral		CDC42BPA	TCCTTGGTCCATGCCTCCAG	43	172.236	p53 CDE Neutral		CDC42BPA	TCCTTGGTCCATGCCTCCAG	113	306.345	p53 CDE Neutral		CDC42BPA	TCCTTGGTCCATGCCTCCAG	55	319.368	p53 CDE Neutral		CDC42BPA	TCCTTGGTCCATGCCTCCAG	12	43.9017	p53 CDE Neutral		CDC42BPA	TCCTTGGTCCATGCCTCCAG	5	15.7047	p53 CDE Neutral
CDC42BPA	TCTTCAGGTTCAGTCCTCAG	50	256.305	p53 CDE Neutral		CDC42BPA	TCTTCAGGTTCAGTCCTCAG	73	279.991	p53 CDE Neutral		CDC42BPA	TCTTCAGGTTCAGTCCTCAG	118	329.414	p53 CDE Neutral		CDC42BPA	TCTTCAGGTTCAGTCCTCAG	43	172.236	p53 CDE Neutral		CDC42BPA	TCTTCAGGTTCAGTCCTCAG	99	268.391	p53 CDE Neutral		CDC42BPA	TCTTCAGGTTCAGTCCTCAG	67	389.049	p53 CDE Neutral		CDC42BPA	TCTTCAGGTTCAGTCCTCAG	7	25.6093	p53 CDE Neutral		CDC42BPA	TCTTCAGGTTCAGTCCTCAG	18	56.5367	p53 CDE Neutral
CDC42BPA	TTACAATGCACCATATCTCT	111	568.997	p53 CDE Neutral		CDC42BPA	TTACAATGCACCATATCTCT	115	441.081	p53 CDE Neutral		CDC42BPA	TTACAATGCACCATATCTCT	174	485.746	p53 CDE Neutral		CDC42BPA	TTACAATGCACCATATCTCT	73	292.4	p53 CDE Neutral		CDC42BPA	TTACAATGCACCATATCTCT	185	501.539	p53 CDE Neutral		CDC42BPA	TTACAATGCACCATATCTCT	100	580.67	p53 CDE Neutral		CDC42BPA	TTACAATGCACCATATCTCT	117	428.041	p53 CDE Neutral		CDC42BPA	TTACAATGCACCATATCTCT	62	194.738	p53 CDE Neutral
CDKN1A	AATGGCGGGCTGCATCCAGG	43	220.422	p53 CDE Neg		CDKN1A	AATGGCGGGCTGCATCCAGG	79	303.004	p53 CDE Neg		CDKN1A	AATGGCGGGCTGCATCCAGG	67	187.04	p53 CDE Neg		CDKN1A	AATGGCGGGCTGCATCCAGG	100	400.548	p53 CDE Neg		CDKN1A	AATGGCGGGCTGCATCCAGG	136	368.699	p53 CDE Neg		CDKN1A	AATGGCGGGCTGCATCCAGG	77	447.116	p53 CDE Neg		CDKN1A	AATGGCGGGCTGCATCCAGG	209	764.621	p53 CDE Neg		CDKN1A	AATGGCGGGCTGCATCCAGG	131	411.462	p53 CDE Neg
CDKN1A	AGATCAGCCGGCGTTTGGAG	49	251.179	p53 CDE Neg		CDKN1A	AGATCAGCCGGCGTTTGGAG	54	207.116	p53 CDE Neg		CDKN1A	AGATCAGCCGGCGTTTGGAG	102	284.748	p53 CDE Neg		CDKN1A	AGATCAGCCGGCGTTTGGAG	86	344.471	p53 CDE Neg		CDKN1A	AGATCAGCCGGCGTTTGGAG	106	287.368	p53 CDE Neg		CDKN1A	AGATCAGCCGGCGTTTGGAG	69	400.662	p53 CDE Neg		CDKN1A	AGATCAGCCGGCGTTTGGAG	66	241.459	p53 CDE Neg		CDKN1A	AGATCAGCCGGCGTTTGGAG	84	263.838	p53 CDE Neg
CDKN1A	ATTTCTACCACTCCAAACGC	22	112.774	p53 CDE Neg		CDKN1A	ATTTCTACCACTCCAAACGC	8	30.6839	p53 CDE Neg		CDKN1A	ATTTCTACCACTCCAAACGC	12	33.4997	p53 CDE Neg		CDKN1A	ATTTCTACCACTCCAAACGC	9	36.0493	p53 CDE Neg		CDKN1A	ATTTCTACCACTCCAAACGC	8	21.6882	p53 CDE Neg		CDKN1A	ATTTCTACCACTCCAAACGC	11	63.8736	p53 CDE Neg		CDKN1A	ATTTCTACCACTCCAAACGC	8	29.2678	p53 CDE Neg		CDKN1A	ATTTCTACCACTCCAAACGC	0	0	p53 CDE Neg
CDKN1A	CAGGCGAAGTCACCCTCCAG	32	164.035	p53 CDE Neg		CDKN1A	CAGGCGAAGTCACCCTCCAG	63	241.636	p53 CDE Neg		CDKN1A	CAGGCGAAGTCACCCTCCAG	94	262.414	p53 CDE Neg		CDKN1A	CAGGCGAAGTCACCCTCCAG	108	432.592	p53 CDE Neg		CDKN1A	CAGGCGAAGTCACCCTCCAG	70	189.771	p53 CDE Neg		CDKN1A	CAGGCGAAGTCACCCTCCAG	61	354.208	p53 CDE Neg		CDKN1A	CAGGCGAAGTCACCCTCCAG	18	65.8525	p53 CDE Neg		CDKN1A	CAGGCGAAGTCACCCTCCAG	39	122.496	p53 CDE Neg
CDKN1A	CCAAGCTCTACCTTCCCACG	81	415.214	p53 CDE Neg		CDKN1A	CCAAGCTCTACCTTCCCACG	117	448.752	p53 CDE Neg		CDKN1A	CCAAGCTCTACCTTCCCACG	74	206.582	p53 CDE Neg		CDKN1A	CCAAGCTCTACCTTCCCACG	112	448.614	p53 CDE Neg		CDKN1A	CCAAGCTCTACCTTCCCACG	196	531.36	p53 CDE Neg		CDKN1A	CCAAGCTCTACCTTCCCACG	106	615.51	p53 CDE Neg		CDKN1A	CCAAGCTCTACCTTCCCACG	181	662.184	p53 CDE Neg		CDKN1A	CCAAGCTCTACCTTCCCACG	212	665.877	p53 CDE Neg
CDKN1A	CCACTGGGCCGAAGAGGCGG	28	143.531	p53 CDE Neg		CDKN1A	CCACTGGGCCGAAGAGGCGG	49	187.939	p53 CDE Neg		CDKN1A	CCACTGGGCCGAAGAGGCGG	23	64.2078	p53 CDE Neg		CDKN1A	CCACTGGGCCGAAGAGGCGG	46	184.252	p53 CDE Neg		CDKN1A	CCACTGGGCCGAAGAGGCGG	64	173.505	p53 CDE Neg		CDKN1A	CCACTGGGCCGAAGAGGCGG	47	272.915	p53 CDE Neg		CDKN1A	CCACTGGGCCGAAGAGGCGG	4	14.6339	p53 CDE Neg		CDKN1A	CCACTGGGCCGAAGAGGCGG	0	0	p53 CDE Neg
CDKN1A	CCATTAGCGCATCACAGTCG	30	153.783	p53 CDE Neg		CDKN1A	CCATTAGCGCATCACAGTCG	44	168.761	p53 CDE Neg		CDKN1A	CCATTAGCGCATCACAGTCG	86	240.081	p53 CDE Neg		CDKN1A	CCATTAGCGCATCACAGTCG	65	260.356	p53 CDE Neg		CDKN1A	CCATTAGCGCATCACAGTCG	81	219.593	p53 CDE Neg		CDKN1A	CCATTAGCGCATCACAGTCG	37	214.848	p53 CDE Neg		CDKN1A	CCATTAGCGCATCACAGTCG	43	157.314	p53 CDE Neg		CDKN1A	CCATTAGCGCATCACAGTCG	39	122.496	p53 CDE Neg
CDKN1A	GATGTCCGTCAGAACCCATG	128	656.141	p53 CDE Neg		CDKN1A	GATGTCCGTCAGAACCCATG	177	678.881	p53 CDE Neg		CDKN1A	GATGTCCGTCAGAACCCATG	192	535.995	p53 CDE Neg		CDKN1A	GATGTCCGTCAGAACCCATG	208	833.14	p53 CDE Neg		CDKN1A	GATGTCCGTCAGAACCCATG	245	664.2	p53 CDE Neg		CDKN1A	GATGTCCGTCAGAACCCATG	101	586.476	p53 CDE Neg		CDKN1A	GATGTCCGTCAGAACCCATG	35	128.047	p53 CDE Neg		CDKN1A	GATGTCCGTCAGAACCCATG	16	50.2549	p53 CDE Neg
CDKN1A	GCCGGCTGATCTTCTCCAAG	60	307.566	p53 CDE Neg		CDKN1A	GCCGGCTGATCTTCTCCAAG	93	356.7	p53 CDE Neg		CDKN1A	GCCGGCTGATCTTCTCCAAG	69	192.623	p53 CDE Neg		CDKN1A	GCCGGCTGATCTTCTCCAAG	37	148.203	p53 CDE Neg		CDKN1A	GCCGGCTGATCTTCTCCAAG	101	273.813	p53 CDE Neg		CDKN1A	GCCGGCTGATCTTCTCCAAG	36	209.041	p53 CDE Neg		CDKN1A	GCCGGCTGATCTTCTCCAAG	1009	3691.4	p53 CDE Neg		CDKN1A	GCCGGCTGATCTTCTCCAAG	887	2786.01	p53 CDE Neg
CDKN1A	TGTCACCGAGACACCACTGG	24	123.026	p53 CDE Neg		CDKN1A	TGTCACCGAGACACCACTGG	60	230.129	p53 CDE Neg		CDKN1A	TGTCACCGAGACACCACTGG	84	234.498	p53 CDE Neg		CDKN1A	TGTCACCGAGACACCACTGG	53	212.29	p53 CDE Neg		CDKN1A	TGTCACCGAGACACCACTGG	99	268.391	p53 CDE Neg		CDKN1A	TGTCACCGAGACACCACTGG	42	243.881	p53 CDE Neg		CDKN1A	TGTCACCGAGACACCACTGG	0	0	p53 CDE Neg		CDKN1A	TGTCACCGAGACACCACTGG	24	75.3823	p53 CDE Neg
CDKN2A	ACCACGAAAACCCTCACTCG	63	322.944	p53 CDE Neutral		CDKN2A	ACCACGAAAACCCTCACTCG	105	402.726	p53 CDE Neutral		CDKN2A	ACCACGAAAACCCTCACTCG	182	508.079	p53 CDE Neutral		CDKN2A	ACCACGAAAACCCTCACTCG	95	380.521	p53 CDE Neutral		CDKN2A	ACCACGAAAACCCTCACTCG	97	262.969	p53 CDE Neutral		CDKN2A	ACCACGAAAACCCTCACTCG	53	307.755	p53 CDE Neutral		CDKN2A	ACCACGAAAACCCTCACTCG	2	7.31695	p53 CDE Neutral		CDKN2A	ACCACGAAAACCCTCACTCG	45	141.342	p53 CDE Neutral
CDKN2A	ACGAAAACCCTCACTCGCGG	35	179.414	p53 CDE Neutral		CDKN2A	ACGAAAACCCTCACTCGCGG	51	195.61	p53 CDE Neutral		CDKN2A	ACGAAAACCCTCACTCGCGG	174	485.746	p53 CDE Neutral		CDKN2A	ACGAAAACCCTCACTCGCGG	72	288.395	p53 CDE Neutral		CDKN2A	ACGAAAACCCTCACTCGCGG	56	151.817	p53 CDE Neutral		CDKN2A	ACGAAAACCCTCACTCGCGG	29	168.394	p53 CDE Neutral		CDKN2A	ACGAAAACCCTCACTCGCGG	36	131.705	p53 CDE Neutral		CDKN2A	ACGAAAACCCTCACTCGCGG	34	106.792	p53 CDE Neutral
CDKN2A	ACGCACCGAATAGTTACGGT	22	112.774	p53 CDE Neutral		CDKN2A	ACGCACCGAATAGTTACGGT	34	130.407	p53 CDE Neutral		CDKN2A	ACGCACCGAATAGTTACGGT	74	206.582	p53 CDE Neutral		CDKN2A	ACGCACCGAATAGTTACGGT	126	504.69	p53 CDE Neutral		CDKN2A	ACGCACCGAATAGTTACGGT	58	157.239	p53 CDE Neutral		CDKN2A	ACGCACCGAATAGTTACGGT	19	110.327	p53 CDE Neutral		CDKN2A	ACGCACCGAATAGTTACGGT	94	343.897	p53 CDE Neutral		CDKN2A	ACGCACCGAATAGTTACGGT	26	81.6642	p53 CDE Neutral
CDKN2A	CATCAGCACGAGGGCCACAG	75	384.458	p53 CDE Neutral		CDKN2A	CATCAGCACGAGGGCCACAG	56	214.787	p53 CDE Neutral		CDKN2A	CATCAGCACGAGGGCCACAG	74	206.582	p53 CDE Neutral		CDKN2A	CATCAGCACGAGGGCCACAG	61	244.334	p53 CDE Neutral		CDKN2A	CATCAGCACGAGGGCCACAG	87	235.859	p53 CDE Neutral		CDKN2A	CATCAGCACGAGGGCCACAG	28	162.587	p53 CDE Neutral		CDKN2A	CATCAGCACGAGGGCCACAG	6	21.9508	p53 CDE Neutral		CDKN2A	CATCAGCACGAGGGCCACAG	6	18.8456	p53 CDE Neutral
CDKN2A	CCATGCCCGCATAGATGCCG	52	266.557	p53 CDE Neutral		CDKN2A	CCATGCCCGCATAGATGCCG	50	191.774	p53 CDE Neutral		CDKN2A	CCATGCCCGCATAGATGCCG	106	295.914	p53 CDE Neutral		CDKN2A	CCATGCCCGCATAGATGCCG	66	264.362	p53 CDE Neutral		CDKN2A	CCATGCCCGCATAGATGCCG	123	333.455	p53 CDE Neutral		CDKN2A	CCATGCCCGCATAGATGCCG	57	330.982	p53 CDE Neutral		CDKN2A	CCATGCCCGCATAGATGCCG	12	43.9017	p53 CDE Neutral		CDKN2A	CCATGCCCGCATAGATGCCG	73	229.288	p53 CDE Neutral
CDKN2A	CTACCTGGTCTTCTAGGAAG	79	404.962	p53 CDE Neutral		CDKN2A	CTACCTGGTCTTCTAGGAAG	95	364.371	p53 CDE Neutral		CDKN2A	CTACCTGGTCTTCTAGGAAG	157	438.288	p53 CDE Neutral		CDKN2A	CTACCTGGTCTTCTAGGAAG	84	336.46	p53 CDE Neutral		CDKN2A	CTACCTGGTCTTCTAGGAAG	129	349.721	p53 CDE Neutral		CDKN2A	CTACCTGGTCTTCTAGGAAG	71	412.275	p53 CDE Neutral		CDKN2A	CTACCTGGTCTTCTAGGAAG	28	102.437	p53 CDE Neutral		CDKN2A	CTACCTGGTCTTCTAGGAAG	9	28.2684	p53 CDE Neutral
CDKN2A	GCACGCGCGCCGAATCCGGA	28	143.531	p53 CDE Neutral		CDKN2A	GCACGCGCGCCGAATCCGGA	34	130.407	p53 CDE Neutral		CDKN2A	GCACGCGCGCCGAATCCGGA	63	175.874	p53 CDE Neutral		CDKN2A	GCACGCGCGCCGAATCCGGA	43	172.236	p53 CDE Neutral		CDKN2A	GCACGCGCGCCGAATCCGGA	30	81.3306	p53 CDE Neutral		CDKN2A	GCACGCGCGCCGAATCCGGA	39	226.461	p53 CDE Neutral		CDKN2A	GCACGCGCGCCGAATCCGGA	0	0	p53 CDE Neutral		CDKN2A	GCACGCGCGCCGAATCCGGA	8	25.1274	p53 CDE Neutral
CDKN2A	GCCCACTCCCCCGTGAGCCG	51	261.431	p53 CDE Neutral		CDKN2A	GCCCACTCCCCCGTGAGCCG	31	118.9	p53 CDE Neutral		CDKN2A	GCCCACTCCCCCGTGAGCCG	110	307.081	p53 CDE Neutral		CDKN2A	GCCCACTCCCCCGTGAGCCG	51	204.279	p53 CDE Neutral		CDKN2A	GCCCACTCCCCCGTGAGCCG	67	181.638	p53 CDE Neutral		CDKN2A	GCCCACTCCCCCGTGAGCCG	51	296.141	p53 CDE Neutral		CDKN2A	GCCCACTCCCCCGTGAGCCG	76	278.044	p53 CDE Neutral		CDKN2A	GCCCACTCCCCCGTGAGCCG	53	166.469	p53 CDE Neutral
CDKN2A	GGTACCGTGCGACATCGCGA	78	399.836	p53 CDE Neutral		CDKN2A	GGTACCGTGCGACATCGCGA	73	279.991	p53 CDE Neutral		CDKN2A	GGTACCGTGCGACATCGCGA	320	893.326	p53 CDE Neutral		CDKN2A	GGTACCGTGCGACATCGCGA	247	989.353	p53 CDE Neutral		CDKN2A	GGTACCGTGCGACATCGCGA	98	265.68	p53 CDE Neutral		CDKN2A	GGTACCGTGCGACATCGCGA	53	307.755	p53 CDE Neutral		CDKN2A	GGTACCGTGCGACATCGCGA	30	109.754	p53 CDE Neutral		CDKN2A	GGTACCGTGCGACATCGCGA	12	37.6912	p53 CDE Neutral
CDKN2A	TTTTCGTGGTTCACATCCCG	0	0	p53 CDE Neutral		CDKN2A	TTTTCGTGGTTCACATCCCG	0	0	p53 CDE Neutral		CDKN2A	TTTTCGTGGTTCACATCCCG	0	0	p53 CDE Neutral		CDKN2A	TTTTCGTGGTTCACATCCCG	0	0	p53 CDE Neutral		CDKN2A	TTTTCGTGGTTCACATCCCG	0	0	p53 CDE Neutral		CDKN2A	TTTTCGTGGTTCACATCCCG	0	0	p53 CDE Neutral		CDKN2A	TTTTCGTGGTTCACATCCCG	0	0	p53 CDE Neutral		CDKN2A	TTTTCGTGGTTCACATCCCG	0	0	p53 CDE Neutral
CENPM	CACCAGGCAAGTCCCACACT	83	425.466	p53 CDE Neutral		CENPM	CACCAGGCAAGTCCCACACT	78	299.168	p53 CDE Neutral		CENPM	CACCAGGCAAGTCCCACACT	160	446.663	p53 CDE Neutral		CENPM	CACCAGGCAAGTCCCACACT	97	388.532	p53 CDE Neutral		CENPM	CACCAGGCAAGTCCCACACT	130	352.432	p53 CDE Neutral		CENPM	CACCAGGCAAGTCCCACACT	56	325.175	p53 CDE Neutral		CENPM	CACCAGGCAAGTCCCACACT	161	589.014	p53 CDE Neutral		CENPM	CACCAGGCAAGTCCCACACT	169	530.817	p53 CDE Neutral
CENPM	CAGCATTCACCGGCACACCG	84	430.593	p53 CDE Neutral		CENPM	CAGCATTCACCGGCACACCG	77	295.333	p53 CDE Neutral		CENPM	CAGCATTCACCGGCACACCG	17	47.4579	p53 CDE Neutral		CENPM	CAGCATTCACCGGCACACCG	49	196.268	p53 CDE Neutral		CENPM	CAGCATTCACCGGCACACCG	91	246.703	p53 CDE Neutral		CENPM	CAGCATTCACCGGCACACCG	48	278.721	p53 CDE Neutral		CENPM	CAGCATTCACCGGCACACCG	1	3.65847	p53 CDE Neutral		CENPM	CAGCATTCACCGGCACACCG	3	9.42279	p53 CDE Neutral
CENPM	CCAGGTCACAGTAGAGCAGG	57	292.188	p53 CDE Neutral		CENPM	CCAGGTCACAGTAGAGCAGG	44	168.761	p53 CDE Neutral		CENPM	CCAGGTCACAGTAGAGCAGG	67	187.04	p53 CDE Neutral		CENPM	CCAGGTCACAGTAGAGCAGG	34	136.186	p53 CDE Neutral		CENPM	CCAGGTCACAGTAGAGCAGG	107	290.079	p53 CDE Neutral		CENPM	CCAGGTCACAGTAGAGCAGG	35	203.234	p53 CDE Neutral		CENPM	CCAGGTCACAGTAGAGCAGG	20	73.1695	p53 CDE Neutral		CENPM	CCAGGTCACAGTAGAGCAGG	12	37.6912	p53 CDE Neutral
CENPM	GCAAGTGCATGGGCCGAGTG	22	112.774	p53 CDE Neutral		CENPM	GCAAGTGCATGGGCCGAGTG	66	253.142	p53 CDE Neutral		CENPM	GCAAGTGCATGGGCCGAGTG	46	128.416	p53 CDE Neutral		CENPM	GCAAGTGCATGGGCCGAGTG	45	180.247	p53 CDE Neutral		CENPM	GCAAGTGCATGGGCCGAGTG	79	214.17	p53 CDE Neutral		CENPM	GCAAGTGCATGGGCCGAGTG	38	220.654	p53 CDE Neutral		CENPM	GCAAGTGCATGGGCCGAGTG	229	837.791	p53 CDE Neutral		CENPM	GCAAGTGCATGGGCCGAGTG	49	153.906	p53 CDE Neutral
CENPM	GGCCGAGTGTGGGACTTGCC	55	281.936	p53 CDE Neutral		CENPM	GGCCGAGTGTGGGACTTGCC	72	276.155	p53 CDE Neutral		CENPM	GGCCGAGTGTGGGACTTGCC	189	527.621	p53 CDE Neutral		CENPM	GGCCGAGTGTGGGACTTGCC	117	468.641	p53 CDE Neutral		CENPM	GGCCGAGTGTGGGACTTGCC	109	295.501	p53 CDE Neutral		CENPM	GGCCGAGTGTGGGACTTGCC	40	232.268	p53 CDE Neutral		CENPM	GGCCGAGTGTGGGACTTGCC	36	131.705	p53 CDE Neutral		CENPM	GGCCGAGTGTGGGACTTGCC	22	69.1005	p53 CDE Neutral
CENPM	GGCGGACTCGATGCTCAAAG	16	82.0176	p53 CDE Neutral		CENPM	GGCGGACTCGATGCTCAAAG	29	111.229	p53 CDE Neutral		CENPM	GGCGGACTCGATGCTCAAAG	3	8.37493	p53 CDE Neutral		CENPM	GGCGGACTCGATGCTCAAAG	2	8.01096	p53 CDE Neutral		CENPM	GGCGGACTCGATGCTCAAAG	31	84.0416	p53 CDE Neutral		CENPM	GGCGGACTCGATGCTCAAAG	34	197.428	p53 CDE Neutral		CENPM	GGCGGACTCGATGCTCAAAG	0	0	p53 CDE Neutral		CENPM	GGCGGACTCGATGCTCAAAG	0	0	p53 CDE Neutral
CENPM	GGTGTGGGCCAGCTTCACCA	2	10.2522	p53 CDE Neutral		CENPM	GGTGTGGGCCAGCTTCACCA	9	34.5194	p53 CDE Neutral		CENPM	GGTGTGGGCCAGCTTCACCA	1	2.79164	p53 CDE Neutral		CENPM	GGTGTGGGCCAGCTTCACCA	0	0	p53 CDE Neutral		CENPM	GGTGTGGGCCAGCTTCACCA	12	32.5322	p53 CDE Neutral		CENPM	GGTGTGGGCCAGCTTCACCA	3	17.4201	p53 CDE Neutral		CENPM	GGTGTGGGCCAGCTTCACCA	0	0	p53 CDE Neutral		CENPM	GGTGTGGGCCAGCTTCACCA	0	0	p53 CDE Neutral
CENPM	TCACACTGGAGGGCAAAGGG	51	261.431	p53 CDE Neutral		CENPM	TCACACTGGAGGGCAAAGGG	59	226.294	p53 CDE Neutral		CENPM	TCACACTGGAGGGCAAAGGG	77	214.957	p53 CDE Neutral		CENPM	TCACACTGGAGGGCAAAGGG	79	316.433	p53 CDE Neutral		CENPM	TCACACTGGAGGGCAAAGGG	110	298.212	p53 CDE Neutral		CENPM	TCACACTGGAGGGCAAAGGG	29	168.394	p53 CDE Neutral		CENPM	TCACACTGGAGGGCAAAGGG	8	29.2678	p53 CDE Neutral		CENPM	TCACACTGGAGGGCAAAGGG	15	47.114	p53 CDE Neutral
CENPM	TCGGGGCCGATTCACACTGG	61	312.692	p53 CDE Neutral		CENPM	TCGGGGCCGATTCACACTGG	88	337.523	p53 CDE Neutral		CENPM	TCGGGGCCGATTCACACTGG	60	167.499	p53 CDE Neutral		CENPM	TCGGGGCCGATTCACACTGG	60	240.329	p53 CDE Neutral		CENPM	TCGGGGCCGATTCACACTGG	95	257.547	p53 CDE Neutral		CENPM	TCGGGGCCGATTCACACTGG	38	220.654	p53 CDE Neutral		CENPM	TCGGGGCCGATTCACACTGG	0	0	p53 CDE Neutral		CENPM	TCGGGGCCGATTCACACTGG	35	109.933	p53 CDE Neutral
CEP135	ACATAACAGAGGTGTCACGA	8	41.0088	p53 CDE Neutral		CEP135	ACATAACAGAGGTGTCACGA	12	46.0259	p53 CDE Neutral		CEP135	ACATAACAGAGGTGTCACGA	70	195.415	p53 CDE Neutral		CEP135	ACATAACAGAGGTGTCACGA	16	64.0877	p53 CDE Neutral		CEP135	ACATAACAGAGGTGTCACGA	24	65.0645	p53 CDE Neutral		CEP135	ACATAACAGAGGTGTCACGA	11	63.8736	p53 CDE Neutral		CEP135	ACATAACAGAGGTGTCACGA	0	0	p53 CDE Neutral		CEP135	ACATAACAGAGGTGTCACGA	0	0	p53 CDE Neutral
CEP135	ACTCCACTGTCAGAGTCTGG	44	225.548	p53 CDE Neutral		CEP135	ACTCCACTGTCAGAGTCTGG	65	249.307	p53 CDE Neutral		CEP135	ACTCCACTGTCAGAGTCTGG	84	234.498	p53 CDE Neutral		CEP135	ACTCCACTGTCAGAGTCTGG	160	640.877	p53 CDE Neutral		CEP135	ACTCCACTGTCAGAGTCTGG	104	281.946	p53 CDE Neutral		CEP135	ACTCCACTGTCAGAGTCTGG	49	284.528	p53 CDE Neutral		CEP135	ACTCCACTGTCAGAGTCTGG	24	87.8034	p53 CDE Neutral		CEP135	ACTCCACTGTCAGAGTCTGG	18	56.5367	p53 CDE Neutral
CEP135	AGTTCATAAATACATAACAG	71	363.953	p53 CDE Neutral		CEP135	AGTTCATAAATACATAACAG	74	283.826	p53 CDE Neutral		CEP135	AGTTCATAAATACATAACAG	115	321.039	p53 CDE Neutral		CEP135	AGTTCATAAATACATAACAG	69	276.378	p53 CDE Neutral		CEP135	AGTTCATAAATACATAACAG	137	371.41	p53 CDE Neutral		CEP135	AGTTCATAAATACATAACAG	44	255.495	p53 CDE Neutral		CEP135	AGTTCATAAATACATAACAG	250	914.619	p53 CDE Neutral		CEP135	AGTTCATAAATACATAACAG	77	241.852	p53 CDE Neutral
CEP135	ATAAGACTAACAATATTATG	38	194.792	p53 CDE Neutral		CEP135	ATAAGACTAACAATATTATG	59	226.294	p53 CDE Neutral		CEP135	ATAAGACTAACAATATTATG	39	108.874	p53 CDE Neutral		CEP135	ATAAGACTAACAATATTATG	36	144.197	p53 CDE Neutral		CEP135	ATAAGACTAACAATATTATG	64	173.505	p53 CDE Neutral		CEP135	ATAAGACTAACAATATTATG	26	150.974	p53 CDE Neutral		CEP135	ATAAGACTAACAATATTATG	46	168.29	p53 CDE Neutral		CEP135	ATAAGACTAACAATATTATG	75	235.57	p53 CDE Neutral
CEP135	ATACCGCCAGACTCTGACAG	35	179.414	p53 CDE Neutral		CEP135	ATACCGCCAGACTCTGACAG	58	222.458	p53 CDE Neutral		CEP135	ATACCGCCAGACTCTGACAG	90	251.248	p53 CDE Neutral		CEP135	ATACCGCCAGACTCTGACAG	48	192.263	p53 CDE Neutral		CEP135	ATACCGCCAGACTCTGACAG	85	230.437	p53 CDE Neutral		CEP135	ATACCGCCAGACTCTGACAG	50	290.335	p53 CDE Neutral		CEP135	ATACCGCCAGACTCTGACAG	28	102.437	p53 CDE Neutral		CEP135	ATACCGCCAGACTCTGACAG	27	84.8051	p53 CDE Neutral
CEP135	CACCCCTTAGTTCCACTCTG	12	61.5132	p53 CDE Neutral		CEP135	CACCCCTTAGTTCCACTCTG	8	30.6839	p53 CDE Neutral		CEP135	CACCCCTTAGTTCCACTCTG	13	36.2914	p53 CDE Neutral		CEP135	CACCCCTTAGTTCCACTCTG	22	88.1205	p53 CDE Neutral		CEP135	CACCCCTTAGTTCCACTCTG	22	59.6424	p53 CDE Neutral		CEP135	CACCCCTTAGTTCCACTCTG	7	40.6469	p53 CDE Neutral		CEP135	CACCCCTTAGTTCCACTCTG	0	0	p53 CDE Neutral		CEP135	CACCCCTTAGTTCCACTCTG	0	0	p53 CDE Neutral
CEP135	CTATGTTCAGGAGAATGTGA	23	117.9	p53 CDE Neutral		CEP135	CTATGTTCAGGAGAATGTGA	48	184.103	p53 CDE Neutral		CEP135	CTATGTTCAGGAGAATGTGA	55	153.54	p53 CDE Neutral		CEP135	CTATGTTCAGGAGAATGTGA	38	152.208	p53 CDE Neutral		CEP135	CTATGTTCAGGAGAATGTGA	50	135.551	p53 CDE Neutral		CEP135	CTATGTTCAGGAGAATGTGA	28	162.587	p53 CDE Neutral		CEP135	CTATGTTCAGGAGAATGTGA	3	10.9754	p53 CDE Neutral		CEP135	CTATGTTCAGGAGAATGTGA	12	37.6912	p53 CDE Neutral
CEP135	CTCAGAGTGGAACTAAGGGG	45	230.675	p53 CDE Neutral		CEP135	CTCAGAGTGGAACTAAGGGG	45	172.597	p53 CDE Neutral		CEP135	CTCAGAGTGGAACTAAGGGG	58	161.915	p53 CDE Neutral		CEP135	CTCAGAGTGGAACTAAGGGG	19	76.1041	p53 CDE Neutral		CEP135	CTCAGAGTGGAACTAAGGGG	77	208.748	p53 CDE Neutral		CEP135	CTCAGAGTGGAACTAAGGGG	30	174.201	p53 CDE Neutral		CEP135	CTCAGAGTGGAACTAAGGGG	69	252.435	p53 CDE Neutral		CEP135	CTCAGAGTGGAACTAAGGGG	88	276.402	p53 CDE Neutral
CEP135	GGTGAGAGACTATAGCAAGC	41	210.17	p53 CDE Neutral		CEP135	GGTGAGAGACTATAGCAAGC	46	176.432	p53 CDE Neutral		CEP135	GGTGAGAGACTATAGCAAGC	80	223.331	p53 CDE Neutral		CEP135	GGTGAGAGACTATAGCAAGC	59	236.323	p53 CDE Neutral		CEP135	GGTGAGAGACTATAGCAAGC	37	100.308	p53 CDE Neutral		CEP135	GGTGAGAGACTATAGCAAGC	19	110.327	p53 CDE Neutral		CEP135	GGTGAGAGACTATAGCAAGC	37	135.364	p53 CDE Neutral		CEP135	GGTGAGAGACTATAGCAAGC	49	153.906	p53 CDE Neutral
CEP135	TGCCACTTTAGCTCGAAGCA	70	358.827	p53 CDE Neutral		CEP135	TGCCACTTTAGCTCGAAGCA	110	421.904	p53 CDE Neutral		CEP135	TGCCACTTTAGCTCGAAGCA	137	382.455	p53 CDE Neutral		CEP135	TGCCACTTTAGCTCGAAGCA	67	268.367	p53 CDE Neutral		CEP135	TGCCACTTTAGCTCGAAGCA	144	390.387	p53 CDE Neutral		CEP135	TGCCACTTTAGCTCGAAGCA	52	301.948	p53 CDE Neutral		CEP135	TGCCACTTTAGCTCGAAGCA	28	102.437	p53 CDE Neutral		CEP135	TGCCACTTTAGCTCGAAGCA	92	288.966	p53 CDE Neutral
CERS1	ATTTACTTCAAGTCCCGCGG	33	169.161	p53 CDE Neutral		CERS1	ATTTACTTCAAGTCCCGCGG	29	111.229	p53 CDE Neutral		CERS1	ATTTACTTCAAGTCCCGCGG	21	58.6245	p53 CDE Neutral		CERS1	ATTTACTTCAAGTCCCGCGG	14	56.0767	p53 CDE Neutral		CERS1	ATTTACTTCAAGTCCCGCGG	52	140.973	p53 CDE Neutral		CERS1	ATTTACTTCAAGTCCCGCGG	21	121.941	p53 CDE Neutral		CERS1	ATTTACTTCAAGTCCCGCGG	180	658.525	p53 CDE Neutral		CERS1	ATTTACTTCAAGTCCCGCGG	76	238.711	p53 CDE Neutral
CERS1	ATAGCGTAGCGTAGATGGAG	31	158.909	p53 CDE Neutral		CERS1	ATAGCGTAGCGTAGATGGAG	41	157.255	p53 CDE Neutral		CERS1	ATAGCGTAGCGTAGATGGAG	30	83.7493	p53 CDE Neutral		CERS1	ATAGCGTAGCGTAGATGGAG	31	124.17	p53 CDE Neutral		CERS1	ATAGCGTAGCGTAGATGGAG	44	119.285	p53 CDE Neutral		CERS1	ATAGCGTAGCGTAGATGGAG	26	150.974	p53 CDE Neutral		CERS1	ATAGCGTAGCGTAGATGGAG	0	0	p53 CDE Neutral		CERS1	ATAGCGTAGCGTAGATGGAG	0	0	p53 CDE Neutral
CERS1	GACCCGAAAGAGGCGCGCAG	12	61.5132	p53 CDE Neutral		CERS1	GACCCGAAAGAGGCGCGCAG	19	72.8743	p53 CDE Neutral		CERS1	GACCCGAAAGAGGCGCGCAG	20	55.8329	p53 CDE Neutral		CERS1	GACCCGAAAGAGGCGCGCAG	13	52.0712	p53 CDE Neutral		CERS1	GACCCGAAAGAGGCGCGCAG	62	168.083	p53 CDE Neutral		CERS1	GACCCGAAAGAGGCGCGCAG	17	98.7138	p53 CDE Neutral		CERS1	GACCCGAAAGAGGCGCGCAG	18	65.8525	p53 CDE Neutral		CERS1	GACCCGAAAGAGGCGCGCAG	20	62.8186	p53 CDE Neutral
CERS1	GGATGAGAGTGACCACGTGG	81	415.214	p53 CDE Neutral		CERS1	GGATGAGAGTGACCACGTGG	85	326.017	p53 CDE Neutral		CERS1	GGATGAGAGTGACCACGTGG	101	281.956	p53 CDE Neutral		CERS1	GGATGAGAGTGACCACGTGG	61	244.334	p53 CDE Neutral		CERS1	GGATGAGAGTGACCACGTGG	151	409.364	p53 CDE Neutral		CERS1	GGATGAGAGTGACCACGTGG	82	476.149	p53 CDE Neutral		CERS1	GGATGAGAGTGACCACGTGG	23	84.1449	p53 CDE Neutral		CERS1	GGATGAGAGTGACCACGTGG	129	405.18	p53 CDE Neutral
CERS1	CTGTCCTTACCGGAAGGCGT	12	61.5132	p53 CDE Neutral		CERS1	CTGTCCTTACCGGAAGGCGT	12	46.0259	p53 CDE Neutral		CERS1	CTGTCCTTACCGGAAGGCGT	24	66.9994	p53 CDE Neutral		CERS1	CTGTCCTTACCGGAAGGCGT	16	64.0877	p53 CDE Neutral		CERS1	CTGTCCTTACCGGAAGGCGT	19	51.5094	p53 CDE Neutral		CERS1	CTGTCCTTACCGGAAGGCGT	4	23.2268	p53 CDE Neutral		CERS1	CTGTCCTTACCGGAAGGCGT	18	65.8525	p53 CDE Neutral		CERS1	CTGTCCTTACCGGAAGGCGT	23	72.2414	p53 CDE Neutral
CERS1	GCACGTCACTGATATCGTGC	16	82.0176	p53 CDE Neutral		CERS1	GCACGTCACTGATATCGTGC	50	191.774	p53 CDE Neutral		CERS1	GCACGTCACTGATATCGTGC	18	50.2496	p53 CDE Neutral		CERS1	GCACGTCACTGATATCGTGC	6	24.0329	p53 CDE Neutral		CERS1	GCACGTCACTGATATCGTGC	67	181.638	p53 CDE Neutral		CERS1	GCACGTCACTGATATCGTGC	19	110.327	p53 CDE Neutral		CERS1	GCACGTCACTGATATCGTGC	2	7.31695	p53 CDE Neutral		CERS1	GCACGTCACTGATATCGTGC	4	12.5637	p53 CDE Neutral
CERS1	TACCGTAGAAGACAGATGGT	45	230.675	p53 CDE Neutral		CERS1	TACCGTAGAAGACAGATGGT	41	157.255	p53 CDE Neutral		CERS1	TACCGTAGAAGACAGATGGT	171	477.371	p53 CDE Neutral		CERS1	TACCGTAGAAGACAGATGGT	79	316.433	p53 CDE Neutral		CERS1	TACCGTAGAAGACAGATGGT	70	189.771	p53 CDE Neutral		CERS1	TACCGTAGAAGACAGATGGT	43	249.688	p53 CDE Neutral		CERS1	TACCGTAGAAGACAGATGGT	23	84.1449	p53 CDE Neutral		CERS1	TACCGTAGAAGACAGATGGT	13	40.8321	p53 CDE Neutral
CERS1	GAGAAACTTCCAAGCGCTCT	52	266.557	p53 CDE Neutral		CERS1	GAGAAACTTCCAAGCGCTCT	77	295.333	p53 CDE Neutral		CERS1	GAGAAACTTCCAAGCGCTCT	40	111.666	p53 CDE Neutral		CERS1	GAGAAACTTCCAAGCGCTCT	42	168.23	p53 CDE Neutral		CERS1	GAGAAACTTCCAAGCGCTCT	120	325.322	p53 CDE Neutral		CERS1	GAGAAACTTCCAAGCGCTCT	39	226.461	p53 CDE Neutral		CERS1	GAGAAACTTCCAAGCGCTCT	10	36.5847	p53 CDE Neutral		CERS1	GAGAAACTTCCAAGCGCTCT	4	12.5637	p53 CDE Neutral
CERS1	TACGCGCAGCTAGTGCAGCG	33	169.161	p53 CDE Neutral		CERS1	TACGCGCAGCTAGTGCAGCG	80	306.839	p53 CDE Neutral		CERS1	TACGCGCAGCTAGTGCAGCG	96	267.998	p53 CDE Neutral		CERS1	TACGCGCAGCTAGTGCAGCG	73	292.4	p53 CDE Neutral		CERS1	TACGCGCAGCTAGTGCAGCG	79	214.17	p53 CDE Neutral		CERS1	TACGCGCAGCTAGTGCAGCG	43	249.688	p53 CDE Neutral		CERS1	TACGCGCAGCTAGTGCAGCG	16	58.5356	p53 CDE Neutral		CERS1	TACGCGCAGCTAGTGCAGCG	29	91.087	p53 CDE Neutral
CERS1	CCTGGCTGAGCACGCGCACC	32	164.035	p53 CDE Neutral		CERS1	CCTGGCTGAGCACGCGCACC	16	61.3678	p53 CDE Neutral		CERS1	CCTGGCTGAGCACGCGCACC	33	92.1242	p53 CDE Neutral		CERS1	CCTGGCTGAGCACGCGCACC	12	48.0658	p53 CDE Neutral		CERS1	CCTGGCTGAGCACGCGCACC	38	103.019	p53 CDE Neutral		CERS1	CCTGGCTGAGCACGCGCACC	18	104.521	p53 CDE Neutral		CERS1	CCTGGCTGAGCACGCGCACC	3	10.9754	p53 CDE Neutral		CERS1	CCTGGCTGAGCACGCGCACC	0	0	p53 CDE Neutral
CERS2	AAAGCTGATGAGAATGATGG	97	497.232	p53 CDE Pos		CERS2	AAAGCTGATGAGAATGATGG	99	379.713	p53 CDE Pos		CERS2	AAAGCTGATGAGAATGATGG	91	254.04	p53 CDE Pos		CERS2	AAAGCTGATGAGAATGATGG	100	400.548	p53 CDE Pos		CERS2	AAAGCTGATGAGAATGATGG	196	531.36	p53 CDE Pos		CERS2	AAAGCTGATGAGAATGATGG	68	394.855	p53 CDE Pos		CERS2	AAAGCTGATGAGAATGATGG	61	223.167	p53 CDE Pos		CERS2	AAAGCTGATGAGAATGATGG	86	270.12	p53 CDE Pos
CERS2	AAGGCAGGATAGAGCTCCAG	44	225.548	p53 CDE Pos		CERS2	AAGGCAGGATAGAGCTCCAG	45	172.597	p53 CDE Pos		CERS2	AAGGCAGGATAGAGCTCCAG	202	563.912	p53 CDE Pos		CERS2	AAGGCAGGATAGAGCTCCAG	78	312.427	p53 CDE Pos		CERS2	AAGGCAGGATAGAGCTCCAG	69	187.06	p53 CDE Pos		CERS2	AAGGCAGGATAGAGCTCCAG	37	214.848	p53 CDE Pos		CERS2	AAGGCAGGATAGAGCTCCAG	0	0	p53 CDE Pos		CERS2	AAGGCAGGATAGAGCTCCAG	8	25.1274	p53 CDE Pos
CERS2	AGCCAAGATGTTTAACTACG	22	112.774	p53 CDE Pos		CERS2	AGCCAAGATGTTTAACTACG	16	61.3678	p53 CDE Pos		CERS2	AGCCAAGATGTTTAACTACG	66	184.248	p53 CDE Pos		CERS2	AGCCAAGATGTTTAACTACG	23	92.126	p53 CDE Pos		CERS2	AGCCAAGATGTTTAACTACG	51	138.262	p53 CDE Pos		CERS2	AGCCAAGATGTTTAACTACG	26	150.974	p53 CDE Pos		CERS2	AGCCAAGATGTTTAACTACG	51	186.582	p53 CDE Pos		CERS2	AGCCAAGATGTTTAACTACG	13	40.8321	p53 CDE Pos
CERS2	ATGCCTACCAATTACAACAG	0	0	p53 CDE Pos		CERS2	ATGCCTACCAATTACAACAG	0	0	p53 CDE Pos		CERS2	ATGCCTACCAATTACAACAG	0	0	p53 CDE Pos		CERS2	ATGCCTACCAATTACAACAG	0	0	p53 CDE Pos		CERS2	ATGCCTACCAATTACAACAG	0	0	p53 CDE Pos		CERS2	ATGCCTACCAATTACAACAG	0	0	p53 CDE Pos		CERS2	ATGCCTACCAATTACAACAG	0	0	p53 CDE Pos		CERS2	ATGCCTACCAATTACAACAG	0	0	p53 CDE Pos
CERS2	CCATGATTAGAGTCCCAGCT	16	82.0176	p53 CDE Pos		CERS2	CCATGATTAGAGTCCCAGCT	48	184.103	p53 CDE Pos		CERS2	CCATGATTAGAGTCCCAGCT	49	136.791	p53 CDE Pos		CERS2	CCATGATTAGAGTCCCAGCT	33	132.181	p53 CDE Pos		CERS2	CCATGATTAGAGTCCCAGCT	62	168.083	p53 CDE Pos		CERS2	CCATGATTAGAGTCCCAGCT	24	139.361	p53 CDE Pos		CERS2	CCATGATTAGAGTCCCAGCT	14	51.2186	p53 CDE Pos		CERS2	CCATGATTAGAGTCCCAGCT	0	0	p53 CDE Pos
CERS2	GAATGATGGTGGCCACATGG	74	379.332	p53 CDE Pos		CERS2	GAATGATGGTGGCCACATGG	103	395.055	p53 CDE Pos		CERS2	GAATGATGGTGGCCACATGG	79	220.54	p53 CDE Pos		CERS2	GAATGATGGTGGCCACATGG	78	312.427	p53 CDE Pos		CERS2	GAATGATGGTGGCCACATGG	133	360.566	p53 CDE Pos		CERS2	GAATGATGGTGGCCACATGG	51	296.141	p53 CDE Pos		CERS2	GAATGATGGTGGCCACATGG	51	186.582	p53 CDE Pos		CERS2	GAATGATGGTGGCCACATGG	14	43.973	p53 CDE Pos
CERS2	GCTCGGAGAAGAAGTGGAGG	24	123.026	p53 CDE Pos		CERS2	GCTCGGAGAAGAAGTGGAGG	35	134.242	p53 CDE Pos		CERS2	GCTCGGAGAAGAAGTGGAGG	33	92.1242	p53 CDE Pos		CERS2	GCTCGGAGAAGAAGTGGAGG	22	88.1205	p53 CDE Pos		CERS2	GCTCGGAGAAGAAGTGGAGG	87	235.859	p53 CDE Pos		CERS2	GCTCGGAGAAGAAGTGGAGG	23	133.554	p53 CDE Pos		CERS2	GCTCGGAGAAGAAGTGGAGG	0	0	p53 CDE Pos		CERS2	GCTCGGAGAAGAAGTGGAGG	0	0	p53 CDE Pos
CERS2	GTAGCCTGCACATCCAGCTG	0	0	p53 CDE Pos		CERS2	GTAGCCTGCACATCCAGCTG	0	0	p53 CDE Pos		CERS2	GTAGCCTGCACATCCAGCTG	0	0	p53 CDE Pos		CERS2	GTAGCCTGCACATCCAGCTG	0	0	p53 CDE Pos		CERS2	GTAGCCTGCACATCCAGCTG	0	0	p53 CDE Pos		CERS2	GTAGCCTGCACATCCAGCTG	0	0	p53 CDE Pos		CERS2	GTAGCCTGCACATCCAGCTG	0	0	p53 CDE Pos		CERS2	GTAGCCTGCACATCCAGCTG	0	0	p53 CDE Pos
CERS2	TGCCTACCAATTACAACAGA	53	271.683	p53 CDE Pos		CERS2	TGCCTACCAATTACAACAGA	71	272.32	p53 CDE Pos		CERS2	TGCCTACCAATTACAACAGA	98	273.581	p53 CDE Pos		CERS2	TGCCTACCAATTACAACAGA	41	164.225	p53 CDE Pos		CERS2	TGCCTACCAATTACAACAGA	107	290.079	p53 CDE Pos		CERS2	TGCCTACCAATTACAACAGA	38	220.654	p53 CDE Pos		CERS2	TGCCTACCAATTACAACAGA	38	139.022	p53 CDE Pos		CERS2	TGCCTACCAATTACAACAGA	44	138.201	p53 CDE Pos
CERS2	TGTGGGCCATGCGCAAAATG	83	425.466	p53 CDE Pos		CERS2	TGTGGGCCATGCGCAAAATG	85	326.017	p53 CDE Pos		CERS2	TGTGGGCCATGCGCAAAATG	96	267.998	p53 CDE Pos		CERS2	TGTGGGCCATGCGCAAAATG	95	380.521	p53 CDE Pos		CERS2	TGTGGGCCATGCGCAAAATG	106	287.368	p53 CDE Pos		CERS2	TGTGGGCCATGCGCAAAATG	45	261.301	p53 CDE Pos		CERS2	TGTGGGCCATGCGCAAAATG	7	25.6093	p53 CDE Pos		CERS2	TGTGGGCCATGCGCAAAATG	2	6.28186	p53 CDE Pos
CFDP1	ACCAGCAAAATCAAACACCT	75	384.458	p53 CDE Pos		CFDP1	ACCAGCAAAATCAAACACCT	100	383.549	p53 CDE Pos		CFDP1	ACCAGCAAAATCAAACACCT	249	695.119	p53 CDE Pos		CFDP1	ACCAGCAAAATCAAACACCT	152	608.833	p53 CDE Pos		CFDP1	ACCAGCAAAATCAAACACCT	210	569.314	p53 CDE Pos		CFDP1	ACCAGCAAAATCAAACACCT	88	510.989	p53 CDE Pos		CFDP1	ACCAGCAAAATCAAACACCT	26	95.1203	p53 CDE Pos		CFDP1	ACCAGCAAAATCAAACACCT	29	91.087	p53 CDE Pos
CFDP1	ACTGGACTGGGAGAGCTTCA	98	502.358	p53 CDE Pos		CFDP1	ACTGGACTGGGAGAGCTTCA	87	333.687	p53 CDE Pos		CFDP1	ACTGGACTGGGAGAGCTTCA	99	276.373	p53 CDE Pos		CFDP1	ACTGGACTGGGAGAGCTTCA	124	496.679	p53 CDE Pos		CFDP1	ACTGGACTGGGAGAGCTTCA	173	469.006	p53 CDE Pos		CFDP1	ACTGGACTGGGAGAGCTTCA	82	476.149	p53 CDE Pos		CFDP1	ACTGGACTGGGAGAGCTTCA	3	10.9754	p53 CDE Pos		CFDP1	ACTGGACTGGGAGAGCTTCA	0	0	p53 CDE Pos
CFDP1	AGCAGACACAGAAAACCCAA	37	189.666	p53 CDE Pos		CFDP1	AGCAGACACAGAAAACCCAA	29	111.229	p53 CDE Pos		CFDP1	AGCAGACACAGAAAACCCAA	12	33.4997	p53 CDE Pos		CFDP1	AGCAGACACAGAAAACCCAA	10	40.0548	p53 CDE Pos		CFDP1	AGCAGACACAGAAAACCCAA	103	279.235	p53 CDE Pos		CFDP1	AGCAGACACAGAAAACCCAA	52	301.948	p53 CDE Pos		CFDP1	AGCAGACACAGAAAACCCAA	0	0	p53 CDE Pos		CFDP1	AGCAGACACAGAAAACCCAA	0	0	p53 CDE Pos
CFDP1	AGGCGGAATCGCTCACCCGA	94	481.854	p53 CDE Pos		CFDP1	AGGCGGAATCGCTCACCCGA	135	517.791	p53 CDE Pos		CFDP1	AGGCGGAATCGCTCACCCGA	26	72.5827	p53 CDE Pos		CFDP1	AGGCGGAATCGCTCACCCGA	17	68.0932	p53 CDE Pos		CFDP1	AGGCGGAATCGCTCACCCGA	220	596.424	p53 CDE Pos		CFDP1	AGGCGGAATCGCTCACCCGA	121	702.61	p53 CDE Pos		CFDP1	AGGCGGAATCGCTCACCCGA	3	10.9754	p53 CDE Pos		CFDP1	AGGCGGAATCGCTCACCCGA	5	15.7047	p53 CDE Pos
CFDP1	CATCCATAATCGAGGGAAAG	48	246.053	p53 CDE Pos		CFDP1	CATCCATAATCGAGGGAAAG	80	306.839	p53 CDE Pos		CFDP1	CATCCATAATCGAGGGAAAG	59	164.707	p53 CDE Pos		CFDP1	CATCCATAATCGAGGGAAAG	70	280.384	p53 CDE Pos		CFDP1	CATCCATAATCGAGGGAAAG	85	230.437	p53 CDE Pos		CFDP1	CATCCATAATCGAGGGAAAG	77	447.116	p53 CDE Pos		CFDP1	CATCCATAATCGAGGGAAAG	19	69.511	p53 CDE Pos		CFDP1	CATCCATAATCGAGGGAAAG	85	266.979	p53 CDE Pos
CFDP1	GAACTGGCCATCCATAATCG	55	281.936	p53 CDE Pos		CFDP1	GAACTGGCCATCCATAATCG	60	230.129	p53 CDE Pos		CFDP1	GAACTGGCCATCCATAATCG	60	167.499	p53 CDE Pos		CFDP1	GAACTGGCCATCCATAATCG	23	92.126	p53 CDE Pos		CFDP1	GAACTGGCCATCCATAATCG	88	238.57	p53 CDE Pos		CFDP1	GAACTGGCCATCCATAATCG	27	156.781	p53 CDE Pos		CFDP1	GAACTGGCCATCCATAATCG	27	98.7788	p53 CDE Pos		CFDP1	GAACTGGCCATCCATAATCG	28	87.9461	p53 CDE Pos
CFDP1	GAATGAGAAAGAAAAACCAC	49	251.179	p53 CDE Pos		CFDP1	GAATGAGAAAGAAAAACCAC	74	283.826	p53 CDE Pos		CFDP1	GAATGAGAAAGAAAAACCAC	87	242.873	p53 CDE Pos		CFDP1	GAATGAGAAAGAAAAACCAC	50	200.274	p53 CDE Pos		CFDP1	GAATGAGAAAGAAAAACCAC	100	271.102	p53 CDE Pos		CFDP1	GAATGAGAAAGAAAAACCAC	27	156.781	p53 CDE Pos		CFDP1	GAATGAGAAAGAAAAACCAC	28	102.437	p53 CDE Pos		CFDP1	GAATGAGAAAGAAAAACCAC	53	166.469	p53 CDE Pos
CFDP1	GCAGAGCAGGAAAAAGGCAT	38	194.792	p53 CDE Pos		CFDP1	GCAGAGCAGGAAAAAGGCAT	33	126.571	p53 CDE Pos		CFDP1	GCAGAGCAGGAAAAAGGCAT	15	41.8746	p53 CDE Pos		CFDP1	GCAGAGCAGGAAAAAGGCAT	91	364.499	p53 CDE Pos		CFDP1	GCAGAGCAGGAAAAAGGCAT	70	189.771	p53 CDE Pos		CFDP1	GCAGAGCAGGAAAAAGGCAT	35	203.234	p53 CDE Pos		CFDP1	GCAGAGCAGGAAAAAGGCAT	34	124.388	p53 CDE Pos		CFDP1	GCAGAGCAGGAAAAAGGCAT	188	590.495	p53 CDE Pos
CFDP1	GCTGAAGGAACATTAGCCTG	44	225.548	p53 CDE Pos		CFDP1	GCTGAAGGAACATTAGCCTG	33	126.571	p53 CDE Pos		CFDP1	GCTGAAGGAACATTAGCCTG	116	323.831	p53 CDE Pos		CFDP1	GCTGAAGGAACATTAGCCTG	145	580.795	p53 CDE Pos		CFDP1	GCTGAAGGAACATTAGCCTG	57	154.528	p53 CDE Pos		CFDP1	GCTGAAGGAACATTAGCCTG	36	209.041	p53 CDE Pos		CFDP1	GCTGAAGGAACATTAGCCTG	1	3.65847	p53 CDE Pos		CFDP1	GCTGAAGGAACATTAGCCTG	3	9.42279	p53 CDE Pos
CFDP1	GGATGCCAGGAAAAAGAAGG	21	107.648	p53 CDE Pos		CFDP1	GGATGCCAGGAAAAAGAAGG	30	115.065	p53 CDE Pos		CFDP1	GGATGCCAGGAAAAAGAAGG	138	385.247	p53 CDE Pos		CFDP1	GGATGCCAGGAAAAAGAAGG	43	172.236	p53 CDE Pos		CFDP1	GGATGCCAGGAAAAAGAAGG	46	124.707	p53 CDE Pos		CFDP1	GGATGCCAGGAAAAAGAAGG	13	75.487	p53 CDE Pos		CFDP1	GGATGCCAGGAAAAAGAAGG	7	25.6093	p53 CDE Pos		CFDP1	GGATGCCAGGAAAAAGAAGG	19	59.6777	p53 CDE Pos
CFHR3	AATATAAATAGAGGAAGATT	24	123.026	p53 CDE Neutral		CFHR3	AATATAAATAGAGGAAGATT	41	157.255	p53 CDE Neutral		CFHR3	AATATAAATAGAGGAAGATT	24	66.9994	p53 CDE Neutral		CFHR3	AATATAAATAGAGGAAGATT	7	28.0384	p53 CDE Neutral		CFHR3	AATATAAATAGAGGAAGATT	46	124.707	p53 CDE Neutral		CFHR3	AATATAAATAGAGGAAGATT	11	63.8736	p53 CDE Neutral		CFHR3	AATATAAATAGAGGAAGATT	12	43.9017	p53 CDE Neutral		CFHR3	AATATAAATAGAGGAAGATT	67	210.442	p53 CDE Neutral
CFHR3	AATCACTTACTAATGCAAAT	45	230.675	p53 CDE Neutral		CFHR3	AATCACTTACTAATGCAAAT	35	134.242	p53 CDE Neutral		CFHR3	AATCACTTACTAATGCAAAT	100	279.164	p53 CDE Neutral		CFHR3	AATCACTTACTAATGCAAAT	82	328.449	p53 CDE Neutral		CFHR3	AATCACTTACTAATGCAAAT	53	143.684	p53 CDE Neutral		CFHR3	AATCACTTACTAATGCAAAT	33	191.621	p53 CDE Neutral		CFHR3	AATCACTTACTAATGCAAAT	367	1342.66	p53 CDE Neutral		CFHR3	AATCACTTACTAATGCAAAT	234	734.978	p53 CDE Neutral
CFHR3	GAACATTTTGAGACTCCTTC	0	0	p53 CDE Neutral		CFHR3	GAACATTTTGAGACTCCTTC	0	0	p53 CDE Neutral		CFHR3	GAACATTTTGAGACTCCTTC	0	0	p53 CDE Neutral		CFHR3	GAACATTTTGAGACTCCTTC	0	0	p53 CDE Neutral		CFHR3	GAACATTTTGAGACTCCTTC	0	0	p53 CDE Neutral		CFHR3	GAACATTTTGAGACTCCTTC	0	0	p53 CDE Neutral		CFHR3	GAACATTTTGAGACTCCTTC	0	0	p53 CDE Neutral		CFHR3	GAACATTTTGAGACTCCTTC	0	0	p53 CDE Neutral
CFHR3	GATTTTCCAGACATTAAACA	0	0	p53 CDE Neutral		CFHR3	GATTTTCCAGACATTAAACA	0	0	p53 CDE Neutral		CFHR3	GATTTTCCAGACATTAAACA	0	0	p53 CDE Neutral		CFHR3	GATTTTCCAGACATTAAACA	0	0	p53 CDE Neutral		CFHR3	GATTTTCCAGACATTAAACA	0	0	p53 CDE Neutral		CFHR3	GATTTTCCAGACATTAAACA	0	0	p53 CDE Neutral		CFHR3	GATTTTCCAGACATTAAACA	0	0	p53 CDE Neutral		CFHR3	GATTTTCCAGACATTAAACA	0	0	p53 CDE Neutral
CFHR3	GCTTTTGGAAGACCGTAGCC	0	0	p53 CDE Neutral		CFHR3	GCTTTTGGAAGACCGTAGCC	0	0	p53 CDE Neutral		CFHR3	GCTTTTGGAAGACCGTAGCC	0	0	p53 CDE Neutral		CFHR3	GCTTTTGGAAGACCGTAGCC	0	0	p53 CDE Neutral		CFHR3	GCTTTTGGAAGACCGTAGCC	0	0	p53 CDE Neutral		CFHR3	GCTTTTGGAAGACCGTAGCC	0	0	p53 CDE Neutral		CFHR3	GCTTTTGGAAGACCGTAGCC	0	0	p53 CDE Neutral		CFHR3	GCTTTTGGAAGACCGTAGCC	0	0	p53 CDE Neutral
CFHR3	GTTGCCTGCCATCCTGGCTA	0	0	p53 CDE Neutral		CFHR3	GTTGCCTGCCATCCTGGCTA	0	0	p53 CDE Neutral		CFHR3	GTTGCCTGCCATCCTGGCTA	0	0	p53 CDE Neutral		CFHR3	GTTGCCTGCCATCCTGGCTA	0	0	p53 CDE Neutral		CFHR3	GTTGCCTGCCATCCTGGCTA	0	0	p53 CDE Neutral		CFHR3	GTTGCCTGCCATCCTGGCTA	0	0	p53 CDE Neutral		CFHR3	GTTGCCTGCCATCCTGGCTA	0	0	p53 CDE Neutral		CFHR3	GTTGCCTGCCATCCTGGCTA	0	0	p53 CDE Neutral
CFHR3	GTTGCCTGCCATCCTGGCTA	0	0	p53 CDE Neutral		CFHR3	GTTGCCTGCCATCCTGGCTA	0	0	p53 CDE Neutral		CFHR3	GTTGCCTGCCATCCTGGCTA	0	0	p53 CDE Neutral		CFHR3	GTTGCCTGCCATCCTGGCTA	0	0	p53 CDE Neutral		CFHR3	GTTGCCTGCCATCCTGGCTA	0	0	p53 CDE Neutral		CFHR3	GTTGCCTGCCATCCTGGCTA	0	0	p53 CDE Neutral		CFHR3	GTTGCCTGCCATCCTGGCTA	0	0	p53 CDE Neutral		CFHR3	GTTGCCTGCCATCCTGGCTA	0	0	p53 CDE Neutral
CFHR3	TCAGATATAGAAATTGAAAA	116	594.628	p53 CDE Neutral		CFHR3	TCAGATATAGAAATTGAAAA	113	433.41	p53 CDE Neutral		CFHR3	TCAGATATAGAAATTGAAAA	112	312.664	p53 CDE Neutral		CFHR3	TCAGATATAGAAATTGAAAA	139	556.762	p53 CDE Neutral		CFHR3	TCAGATATAGAAATTGAAAA	150	406.653	p53 CDE Neutral		CFHR3	TCAGATATAGAAATTGAAAA	52	301.948	p53 CDE Neutral		CFHR3	TCAGATATAGAAATTGAAAA	35	128.047	p53 CDE Neutral		CFHR3	TCAGATATAGAAATTGAAAA	25	78.5233	p53 CDE Neutral
CFHR3	TTAATGTCTGGAAAATCACA	51	261.431	p53 CDE Neutral		CFHR3	TTAATGTCTGGAAAATCACA	64	245.471	p53 CDE Neutral		CFHR3	TTAATGTCTGGAAAATCACA	259	723.036	p53 CDE Neutral		CFHR3	TTAATGTCTGGAAAATCACA	183	733.003	p53 CDE Neutral		CFHR3	TTAATGTCTGGAAAATCACA	120	325.322	p53 CDE Neutral		CFHR3	TTAATGTCTGGAAAATCACA	72	418.082	p53 CDE Neutral		CFHR3	TTAATGTCTGGAAAATCACA	86	314.629	p53 CDE Neutral		CFHR3	TTAATGTCTGGAAAATCACA	20	62.8186	p53 CDE Neutral
CFHR3	TTACATGTACGGAGAAAGGC	0	0	p53 CDE Neutral		CFHR3	TTACATGTACGGAGAAAGGC	0	0	p53 CDE Neutral		CFHR3	TTACATGTACGGAGAAAGGC	0	0	p53 CDE Neutral		CFHR3	TTACATGTACGGAGAAAGGC	0	0	p53 CDE Neutral		CFHR3	TTACATGTACGGAGAAAGGC	0	0	p53 CDE Neutral		CFHR3	TTACATGTACGGAGAAAGGC	0	0	p53 CDE Neutral		CFHR3	TTACATGTACGGAGAAAGGC	0	0	p53 CDE Neutral		CFHR3	TTACATGTACGGAGAAAGGC	0	0	p53 CDE Neutral
CFHR3	TTACATGTACGGAGAAAGGC	0	0	p53 CDE Neutral		CFHR3	TTACATGTACGGAGAAAGGC	0	0	p53 CDE Neutral		CFHR3	TTACATGTACGGAGAAAGGC	0	0	p53 CDE Neutral		CFHR3	TTACATGTACGGAGAAAGGC	0	0	p53 CDE Neutral		CFHR3	TTACATGTACGGAGAAAGGC	0	0	p53 CDE Neutral		CFHR3	TTACATGTACGGAGAAAGGC	0	0	p53 CDE Neutral		CFHR3	TTACATGTACGGAGAAAGGC	0	0	p53 CDE Neutral		CFHR3	TTACATGTACGGAGAAAGGC	0	0	p53 CDE Neutral
CFHR3	TTCATTGCACACAAAATGGG	56	287.062	p53 CDE Neutral		CFHR3	TTCATTGCACACAAAATGGG	82	314.51	p53 CDE Neutral		CFHR3	TTCATTGCACACAAAATGGG	80	223.331	p53 CDE Neutral		CFHR3	TTCATTGCACACAAAATGGG	69	276.378	p53 CDE Neutral		CFHR3	TTCATTGCACACAAAATGGG	130	352.432	p53 CDE Neutral		CFHR3	TTCATTGCACACAAAATGGG	49	284.528	p53 CDE Neutral		CFHR3	TTCATTGCACACAAAATGGG	89	325.604	p53 CDE Neutral		CFHR3	TTCATTGCACACAAAATGGG	161	505.69	p53 CDE Neutral
CHCHD3	ACACAGTGCATAATACTTCG	0	0	p53 CDE Pos		CHCHD3	ACACAGTGCATAATACTTCG	0	0	p53 CDE Pos		CHCHD3	ACACAGTGCATAATACTTCG	0	0	p53 CDE Pos		CHCHD3	ACACAGTGCATAATACTTCG	0	0	p53 CDE Pos		CHCHD3	ACACAGTGCATAATACTTCG	0	0	p53 CDE Pos		CHCHD3	ACACAGTGCATAATACTTCG	0	0	p53 CDE Pos		CHCHD3	ACACAGTGCATAATACTTCG	0	0	p53 CDE Pos		CHCHD3	ACACAGTGCATAATACTTCG	0	0	p53 CDE Pos
CHCHD3	AGAACAGCTGGCTAGACTGG	43	220.422	p53 CDE Pos		CHCHD3	AGAACAGCTGGCTAGACTGG	49	187.939	p53 CDE Pos		CHCHD3	AGAACAGCTGGCTAGACTGG	73	203.79	p53 CDE Pos		CHCHD3	AGAACAGCTGGCTAGACTGG	52	208.285	p53 CDE Pos		CHCHD3	AGAACAGCTGGCTAGACTGG	29	78.6195	p53 CDE Pos		CHCHD3	AGAACAGCTGGCTAGACTGG	31	180.008	p53 CDE Pos		CHCHD3	AGAACAGCTGGCTAGACTGG	1	3.65847	p53 CDE Pos		CHCHD3	AGAACAGCTGGCTAGACTGG	0	0	p53 CDE Pos
CHCHD3	AGCTTTCTGATATTGTTCAG	2	10.2522	p53 CDE Pos		CHCHD3	AGCTTTCTGATATTGTTCAG	6	23.0129	p53 CDE Pos		CHCHD3	AGCTTTCTGATATTGTTCAG	19	53.0412	p53 CDE Pos		CHCHD3	AGCTTTCTGATATTGTTCAG	4	16.0219	p53 CDE Pos		CHCHD3	AGCTTTCTGATATTGTTCAG	15	40.6653	p53 CDE Pos		CHCHD3	AGCTTTCTGATATTGTTCAG	10	58.067	p53 CDE Pos		CHCHD3	AGCTTTCTGATATTGTTCAG	0	0	p53 CDE Pos		CHCHD3	AGCTTTCTGATATTGTTCAG	0	0	p53 CDE Pos
CHCHD3	ATATCAGAAAGCTGCTGAAG	103	527.989	p53 CDE Pos		CHCHD3	ATATCAGAAAGCTGCTGAAG	95	364.371	p53 CDE Pos		CHCHD3	ATATCAGAAAGCTGCTGAAG	53	147.957	p53 CDE Pos		CHCHD3	ATATCAGAAAGCTGCTGAAG	28	112.153	p53 CDE Pos		CHCHD3	ATATCAGAAAGCTGCTGAAG	111	300.923	p53 CDE Pos		CHCHD3	ATATCAGAAAGCTGCTGAAG	42	243.881	p53 CDE Pos		CHCHD3	ATATCAGAAAGCTGCTGAAG	7	25.6093	p53 CDE Pos		CHCHD3	ATATCAGAAAGCTGCTGAAG	8	25.1274	p53 CDE Pos
CHCHD3	CATATACTGGGTGGCCAGAG	78	399.836	p53 CDE Pos		CHCHD3	CATATACTGGGTGGCCAGAG	138	529.297	p53 CDE Pos		CHCHD3	CATATACTGGGTGGCCAGAG	121	337.789	p53 CDE Pos		CHCHD3	CATATACTGGGTGGCCAGAG	108	432.592	p53 CDE Pos		CHCHD3	CATATACTGGGTGGCCAGAG	159	431.052	p53 CDE Pos		CHCHD3	CATATACTGGGTGGCCAGAG	58	336.788	p53 CDE Pos		CHCHD3	CATATACTGGGTGGCCAGAG	82	299.995	p53 CDE Pos		CHCHD3	CATATACTGGGTGGCCAGAG	46	144.483	p53 CDE Pos
CHCHD3	CGGAGCATTTGAGGGTCTGG	48	246.053	p53 CDE Pos		CHCHD3	CGGAGCATTTGAGGGTCTGG	35	134.242	p53 CDE Pos		CHCHD3	CGGAGCATTTGAGGGTCTGG	56	156.332	p53 CDE Pos		CHCHD3	CGGAGCATTTGAGGGTCTGG	87	348.477	p53 CDE Pos		CHCHD3	CGGAGCATTTGAGGGTCTGG	92	249.414	p53 CDE Pos		CHCHD3	CGGAGCATTTGAGGGTCTGG	41	238.074	p53 CDE Pos		CHCHD3	CGGAGCATTTGAGGGTCTGG	56	204.875	p53 CDE Pos		CHCHD3	CGGAGCATTTGAGGGTCTGG	58	182.174	p53 CDE Pos
CHCHD3	GACACAGTGCATATACTGGG	83	425.466	p53 CDE Pos		CHCHD3	GACACAGTGCATATACTGGG	95	364.371	p53 CDE Pos		CHCHD3	GACACAGTGCATATACTGGG	160	446.663	p53 CDE Pos		CHCHD3	GACACAGTGCATATACTGGG	67	268.367	p53 CDE Pos		CHCHD3	GACACAGTGCATATACTGGG	150	406.653	p53 CDE Pos		CHCHD3	GACACAGTGCATATACTGGG	45	261.301	p53 CDE Pos		CHCHD3	GACACAGTGCATATACTGGG	7	25.6093	p53 CDE Pos		CHCHD3	GACACAGTGCATATACTGGG	4	12.5637	p53 CDE Pos
CHCHD3	GATCTCACCTTCCACGGCGG	76	389.584	p53 CDE Pos		CHCHD3	GATCTCACCTTCCACGGCGG	108	414.233	p53 CDE Pos		CHCHD3	GATCTCACCTTCCACGGCGG	68	189.832	p53 CDE Pos		CHCHD3	GATCTCACCTTCCACGGCGG	27	108.148	p53 CDE Pos		CHCHD3	GATCTCACCTTCCACGGCGG	98	265.68	p53 CDE Pos		CHCHD3	GATCTCACCTTCCACGGCGG	68	394.855	p53 CDE Pos		CHCHD3	GATCTCACCTTCCACGGCGG	0	0	p53 CDE Pos		CHCHD3	GATCTCACCTTCCACGGCGG	1	3.14093	p53 CDE Pos
CHCHD3	GTGGACCCCCAAAAGTACAA	27	138.405	p53 CDE Pos		CHCHD3	GTGGACCCCCAAAAGTACAA	36	138.078	p53 CDE Pos		CHCHD3	GTGGACCCCCAAAAGTACAA	57	159.124	p53 CDE Pos		CHCHD3	GTGGACCCCCAAAAGTACAA	69	276.378	p53 CDE Pos		CHCHD3	GTGGACCCCCAAAAGTACAA	51	138.262	p53 CDE Pos		CHCHD3	GTGGACCCCCAAAAGTACAA	42	243.881	p53 CDE Pos		CHCHD3	GTGGACCCCCAAAAGTACAA	26	95.1203	p53 CDE Pos		CHCHD3	GTGGACCCCCAAAAGTACAA	18	56.5367	p53 CDE Pos
CHCHD3	TCTGATCTCACCTTCCACGG	23	117.9	p53 CDE Pos		CHCHD3	TCTGATCTCACCTTCCACGG	42	161.091	p53 CDE Pos		CHCHD3	TCTGATCTCACCTTCCACGG	7	19.5415	p53 CDE Pos		CHCHD3	TCTGATCTCACCTTCCACGG	17	68.0932	p53 CDE Pos		CHCHD3	TCTGATCTCACCTTCCACGG	63	170.794	p53 CDE Pos		CHCHD3	TCTGATCTCACCTTCCACGG	31	180.008	p53 CDE Pos		CHCHD3	TCTGATCTCACCTTCCACGG	2	7.31695	p53 CDE Pos		CHCHD3	TCTGATCTCACCTTCCACGG	0	0	p53 CDE Pos
CHD7	CAATGAAGGATCTACCCAGG	53	271.683	p53 CDE Pos		CHD7	CAATGAAGGATCTACCCAGG	19	72.8743	p53 CDE Pos		CHD7	CAATGAAGGATCTACCCAGG	33	92.1242	p53 CDE Pos		CHD7	CAATGAAGGATCTACCCAGG	37	148.203	p53 CDE Pos		CHD7	CAATGAAGGATCTACCCAGG	50	135.551	p53 CDE Pos		CHD7	CAATGAAGGATCTACCCAGG	36	209.041	p53 CDE Pos		CHD7	CAATGAAGGATCTACCCAGG	0	0	p53 CDE Pos		CHD7	CAATGAAGGATCTACCCAGG	0	0	p53 CDE Pos
CHD7	CTCCAATGAAGGATCTACCC	37	189.666	p53 CDE Pos		CHD7	CTCCAATGAAGGATCTACCC	108	414.233	p53 CDE Pos		CHD7	CTCCAATGAAGGATCTACCC	48	133.999	p53 CDE Pos		CHD7	CTCCAATGAAGGATCTACCC	7	28.0384	p53 CDE Pos		CHD7	CTCCAATGAAGGATCTACCC	132	357.854	p53 CDE Pos		CHD7	CTCCAATGAAGGATCTACCC	45	261.301	p53 CDE Pos		CHD7	CTCCAATGAAGGATCTACCC	0	0	p53 CDE Pos		CHD7	CTCCAATGAAGGATCTACCC	0	0	p53 CDE Pos
CHD7	CTGGGTAGATCCTTCATTGG	74	379.332	p53 CDE Pos		CHD7	CTGGGTAGATCCTTCATTGG	51	195.61	p53 CDE Pos		CHD7	CTGGGTAGATCCTTCATTGG	92	256.831	p53 CDE Pos		CHD7	CTGGGTAGATCCTTCATTGG	55	220.301	p53 CDE Pos		CHD7	CTGGGTAGATCCTTCATTGG	110	298.212	p53 CDE Pos		CHD7	CTGGGTAGATCCTTCATTGG	63	365.822	p53 CDE Pos		CHD7	CTGGGTAGATCCTTCATTGG	0	0	p53 CDE Pos		CHD7	CTGGGTAGATCCTTCATTGG	0	0	p53 CDE Pos
CHD7	GCACGTAGCACAGATGACCG	33	169.161	p53 CDE Pos		CHD7	GCACGTAGCACAGATGACCG	45	172.597	p53 CDE Pos		CHD7	GCACGTAGCACAGATGACCG	30	83.7493	p53 CDE Pos		CHD7	GCACGTAGCACAGATGACCG	0	0	p53 CDE Pos		CHD7	GCACGTAGCACAGATGACCG	54	146.395	p53 CDE Pos		CHD7	GCACGTAGCACAGATGACCG	23	133.554	p53 CDE Pos		CHD7	GCACGTAGCACAGATGACCG	0	0	p53 CDE Pos		CHD7	GCACGTAGCACAGATGACCG	0	0	p53 CDE Pos
CHD7	GCATAAATGTGGTTTCTGAA	26	133.279	p53 CDE Pos		CHD7	GCATAAATGTGGTTTCTGAA	31	118.9	p53 CDE Pos		CHD7	GCATAAATGTGGTTTCTGAA	14	39.083	p53 CDE Pos		CHD7	GCATAAATGTGGTTTCTGAA	9	36.0493	p53 CDE Pos		CHD7	GCATAAATGTGGTTTCTGAA	81	219.593	p53 CDE Pos		CHD7	GCATAAATGTGGTTTCTGAA	40	232.268	p53 CDE Pos		CHD7	GCATAAATGTGGTTTCTGAA	9	32.9263	p53 CDE Pos		CHD7	GCATAAATGTGGTTTCTGAA	2	6.28186	p53 CDE Pos
CHD7	GCTGTGCTACAGTCTATGAG	24	123.026	p53 CDE Pos		CHD7	GCTGTGCTACAGTCTATGAG	47	180.268	p53 CDE Pos		CHD7	GCTGTGCTACAGTCTATGAG	45	125.624	p53 CDE Pos		CHD7	GCTGTGCTACAGTCTATGAG	11	44.0603	p53 CDE Pos		CHD7	GCTGTGCTACAGTCTATGAG	53	143.684	p53 CDE Pos		CHD7	GCTGTGCTACAGTCTATGAG	35	203.234	p53 CDE Pos		CHD7	GCTGTGCTACAGTCTATGAG	1	3.65847	p53 CDE Pos		CHD7	GCTGTGCTACAGTCTATGAG	0	0	p53 CDE Pos
CHD7	GTAGGATTCCCATCAAACAG	96	492.106	p53 CDE Pos		CHD7	GTAGGATTCCCATCAAACAG	114	437.246	p53 CDE Pos		CHD7	GTAGGATTCCCATCAAACAG	69	192.623	p53 CDE Pos		CHD7	GTAGGATTCCCATCAAACAG	32	128.175	p53 CDE Pos		CHD7	GTAGGATTCCCATCAAACAG	165	447.318	p53 CDE Pos		CHD7	GTAGGATTCCCATCAAACAG	100	580.67	p53 CDE Pos		CHD7	GTAGGATTCCCATCAAACAG	19	69.511	p53 CDE Pos		CHD7	GTAGGATTCCCATCAAACAG	24	75.3823	p53 CDE Pos
CHD7	TCAATCTTGAAGATGGGACT	30	153.783	p53 CDE Pos		CHD7	TCAATCTTGAAGATGGGACT	65	249.307	p53 CDE Pos		CHD7	TCAATCTTGAAGATGGGACT	30	83.7493	p53 CDE Pos		CHD7	TCAATCTTGAAGATGGGACT	55	220.301	p53 CDE Pos		CHD7	TCAATCTTGAAGATGGGACT	64	173.505	p53 CDE Pos		CHD7	TCAATCTTGAAGATGGGACT	29	168.394	p53 CDE Pos		CHD7	TCAATCTTGAAGATGGGACT	13	47.5602	p53 CDE Pos		CHD7	TCAATCTTGAAGATGGGACT	20	62.8186	p53 CDE Pos
CHD7	TCTTGAAGATGGGACTAGGC	6	30.7566	p53 CDE Pos		CHD7	TCTTGAAGATGGGACTAGGC	25	95.8872	p53 CDE Pos		CHD7	TCTTGAAGATGGGACTAGGC	24	66.9994	p53 CDE Pos		CHD7	TCTTGAAGATGGGACTAGGC	14	56.0767	p53 CDE Pos		CHD7	TCTTGAAGATGGGACTAGGC	41	111.152	p53 CDE Pos		CHD7	TCTTGAAGATGGGACTAGGC	19	110.327	p53 CDE Pos		CHD7	TCTTGAAGATGGGACTAGGC	95	347.555	p53 CDE Pos		CHD7	TCTTGAAGATGGGACTAGGC	1	3.14093	p53 CDE Pos
CHD7	TGAAGATGGGACTAGGCTGG	100	512.61	p53 CDE Pos		CHD7	TGAAGATGGGACTAGGCTGG	88	337.523	p53 CDE Pos		CHD7	TGAAGATGGGACTAGGCTGG	61	170.29	p53 CDE Pos		CHD7	TGAAGATGGGACTAGGCTGG	54	216.296	p53 CDE Pos		CHD7	TGAAGATGGGACTAGGCTGG	137	371.41	p53 CDE Pos		CHD7	TGAAGATGGGACTAGGCTGG	76	441.309	p53 CDE Pos		CHD7	TGAAGATGGGACTAGGCTGG	45	164.631	p53 CDE Pos		CHD7	TGAAGATGGGACTAGGCTGG	20	62.8186	p53 CDE Pos
CHRAC1	ATGACCCGGATGCGGGATAG	50	256.305	p53 CDE Pos		CHRAC1	ATGACCCGGATGCGGGATAG	58	222.458	p53 CDE Pos		CHRAC1	ATGACCCGGATGCGGGATAG	39	108.874	p53 CDE Pos		CHRAC1	ATGACCCGGATGCGGGATAG	46	184.252	p53 CDE Pos		CHRAC1	ATGACCCGGATGCGGGATAG	58	157.239	p53 CDE Pos		CHRAC1	ATGACCCGGATGCGGGATAG	33	191.621	p53 CDE Pos		CHRAC1	ATGACCCGGATGCGGGATAG	6	21.9508	p53 CDE Pos		CHRAC1	ATGACCCGGATGCGGGATAG	1	3.14093	p53 CDE Pos
CHRAC1	CAGCATCAACCAGGAGGCGT	39	199.918	p53 CDE Pos		CHRAC1	CAGCATCAACCAGGAGGCGT	38	145.749	p53 CDE Pos		CHRAC1	CAGCATCAACCAGGAGGCGT	472	1317.66	p53 CDE Pos		CHRAC1	CAGCATCAACCAGGAGGCGT	345	1381.89	p53 CDE Pos		CHRAC1	CAGCATCAACCAGGAGGCGT	114	309.056	p53 CDE Pos		CHRAC1	CAGCATCAACCAGGAGGCGT	55	319.368	p53 CDE Pos		CHRAC1	CAGCATCAACCAGGAGGCGT	518	1895.09	p53 CDE Pos		CHRAC1	CAGCATCAACCAGGAGGCGT	1528	4799.34	p53 CDE Pos
CHRAC1	CATCATGAAGAGCTCCCCCG	20	102.522	p53 CDE Pos		CHRAC1	CATCATGAAGAGCTCCCCCG	42	161.091	p53 CDE Pos		CHRAC1	CATCATGAAGAGCTCCCCCG	228	636.495	p53 CDE Pos		CHRAC1	CATCATGAAGAGCTCCCCCG	300	1201.64	p53 CDE Pos		CHRAC1	CATCATGAAGAGCTCCCCCG	78	211.459	p53 CDE Pos		CHRAC1	CATCATGAAGAGCTCCCCCG	19	110.327	p53 CDE Pos		CHRAC1	CATCATGAAGAGCTCCCCCG	3	10.9754	p53 CDE Pos		CHRAC1	CATCATGAAGAGCTCCCCCG	200	628.186	p53 CDE Pos
CHRAC1	CGAGGTGTCCAGCATCAACC	0	0	p53 CDE Pos		CHRAC1	CGAGGTGTCCAGCATCAACC	0	0	p53 CDE Pos		CHRAC1	CGAGGTGTCCAGCATCAACC	0	0	p53 CDE Pos		CHRAC1	CGAGGTGTCCAGCATCAACC	0	0	p53 CDE Pos		CHRAC1	CGAGGTGTCCAGCATCAACC	0	0	p53 CDE Pos		CHRAC1	CGAGGTGTCCAGCATCAACC	0	0	p53 CDE Pos		CHRAC1	CGAGGTGTCCAGCATCAACC	0	0	p53 CDE Pos		CHRAC1	CGAGGTGTCCAGCATCAACC	0	0	p53 CDE Pos
CHRAC1	CTACAGACACGGCAGTGGAA	31	158.909	p53 CDE Pos		CHRAC1	CTACAGACACGGCAGTGGAA	47	180.268	p53 CDE Pos		CHRAC1	CTACAGACACGGCAGTGGAA	31	86.5409	p53 CDE Pos		CHRAC1	CTACAGACACGGCAGTGGAA	19	76.1041	p53 CDE Pos		CHRAC1	CTACAGACACGGCAGTGGAA	63	170.794	p53 CDE Pos		CHRAC1	CTACAGACACGGCAGTGGAA	38	220.654	p53 CDE Pos		CHRAC1	CTACAGACACGGCAGTGGAA	279	1020.71	p53 CDE Pos		CHRAC1	CTACAGACACGGCAGTGGAA	184	577.931	p53 CDE Pos
CHRAC1	GCCACCTATTCCTACAGACA	43	220.422	p53 CDE Pos		CHRAC1	GCCACCTATTCCTACAGACA	32	122.736	p53 CDE Pos		CHRAC1	GCCACCTATTCCTACAGACA	162	452.246	p53 CDE Pos		CHRAC1	GCCACCTATTCCTACAGACA	124	496.679	p53 CDE Pos		CHRAC1	GCCACCTATTCCTACAGACA	61	165.372	p53 CDE Pos		CHRAC1	GCCACCTATTCCTACAGACA	32	185.814	p53 CDE Pos		CHRAC1	GCCACCTATTCCTACAGACA	682	2495.08	p53 CDE Pos		CHRAC1	GCCACCTATTCCTACAGACA	1408	4422.43	p53 CDE Pos
CHRAC1	GGTGTCCAGCATCAACCAGG	39	199.918	p53 CDE Pos		CHRAC1	GGTGTCCAGCATCAACCAGG	46	176.432	p53 CDE Pos		CHRAC1	GGTGTCCAGCATCAACCAGG	166	463.413	p53 CDE Pos		CHRAC1	GGTGTCCAGCATCAACCAGG	199	797.09	p53 CDE Pos		CHRAC1	GGTGTCCAGCATCAACCAGG	62	168.083	p53 CDE Pos		CHRAC1	GGTGTCCAGCATCAACCAGG	36	209.041	p53 CDE Pos		CHRAC1	GGTGTCCAGCATCAACCAGG	49	179.265	p53 CDE Pos		CHRAC1	GGTGTCCAGCATCAACCAGG	43	135.06	p53 CDE Pos
CHRAC1	GGTTGATGCTGGACACCTCG	0	0	p53 CDE Pos		CHRAC1	GGTTGATGCTGGACACCTCG	0	0	p53 CDE Pos		CHRAC1	GGTTGATGCTGGACACCTCG	0	0	p53 CDE Pos		CHRAC1	GGTTGATGCTGGACACCTCG	0	0	p53 CDE Pos		CHRAC1	GGTTGATGCTGGACACCTCG	0	0	p53 CDE Pos		CHRAC1	GGTTGATGCTGGACACCTCG	0	0	p53 CDE Pos		CHRAC1	GGTTGATGCTGGACACCTCG	0	0	p53 CDE Pos		CHRAC1	GGTTGATGCTGGACACCTCG	0	0	p53 CDE Pos
CHRAC1	GTTGATGCTGGACACCTCGG	71	363.953	p53 CDE Pos		CHRAC1	GTTGATGCTGGACACCTCGG	144	552.31	p53 CDE Pos		CHRAC1	GTTGATGCTGGACACCTCGG	571	1594.03	p53 CDE Pos		CHRAC1	GTTGATGCTGGACACCTCGG	322	1289.76	p53 CDE Pos		CHRAC1	GTTGATGCTGGACACCTCGG	201	544.915	p53 CDE Pos		CHRAC1	GTTGATGCTGGACACCTCGG	69	400.662	p53 CDE Pos		CHRAC1	GTTGATGCTGGACACCTCGG	250	914.619	p53 CDE Pos		CHRAC1	GTTGATGCTGGACACCTCGG	1018	3197.47	p53 CDE Pos
CHRAC1	TATTCCTACAGACACGGCAG	35	179.414	p53 CDE Pos		CHRAC1	TATTCCTACAGACACGGCAG	38	145.749	p53 CDE Pos		CHRAC1	TATTCCTACAGACACGGCAG	90	251.248	p53 CDE Pos		CHRAC1	TATTCCTACAGACACGGCAG	92	368.504	p53 CDE Pos		CHRAC1	TATTCCTACAGACACGGCAG	105	284.657	p53 CDE Pos		CHRAC1	TATTCCTACAGACACGGCAG	43	249.688	p53 CDE Pos		CHRAC1	TATTCCTACAGACACGGCAG	106	387.798	p53 CDE Pos		CHRAC1	TATTCCTACAGACACGGCAG	62	194.738	p53 CDE Pos
CHRM1	ACTAGGAGAAGGCTGCCAAA	23	117.9	p53 CDE Neg		CHRM1	ACTAGGAGAAGGCTGCCAAA	56	214.787	p53 CDE Neg		CHRM1	ACTAGGAGAAGGCTGCCAAA	97	270.789	p53 CDE Neg		CHRM1	ACTAGGAGAAGGCTGCCAAA	50	200.274	p53 CDE Neg		CHRM1	ACTAGGAGAAGGCTGCCAAA	36	97.5967	p53 CDE Neg		CHRM1	ACTAGGAGAAGGCTGCCAAA	27	156.781	p53 CDE Neg		CHRM1	ACTAGGAGAAGGCTGCCAAA	51	186.582	p53 CDE Neg		CHRM1	ACTAGGAGAAGGCTGCCAAA	0	0	p53 CDE Neg
CHRM1	CCAGCGTGCCCAGAGCCCAG	59	302.44	p53 CDE Neg		CHRM1	CCAGCGTGCCCAGAGCCCAG	53	203.281	p53 CDE Neg		CHRM1	CCAGCGTGCCCAGAGCCCAG	68	189.832	p53 CDE Neg		CHRM1	CCAGCGTGCCCAGAGCCCAG	66	264.362	p53 CDE Neg		CHRM1	CCAGCGTGCCCAGAGCCCAG	78	211.459	p53 CDE Neg		CHRM1	CCAGCGTGCCCAGAGCCCAG	48	278.721	p53 CDE Neg		CHRM1	CCAGCGTGCCCAGAGCCCAG	14	51.2186	p53 CDE Neg		CHRM1	CCAGCGTGCCCAGAGCCCAG	15	47.114	p53 CDE Neg
CHRM1	GAAAGGAGCAGCTGGCCAAG	60	307.566	p53 CDE Neg		CHRM1	GAAAGGAGCAGCTGGCCAAG	80	306.839	p53 CDE Neg		CHRM1	GAAAGGAGCAGCTGGCCAAG	66	184.248	p53 CDE Neg		CHRM1	GAAAGGAGCAGCTGGCCAAG	61	244.334	p53 CDE Neg		CHRM1	GAAAGGAGCAGCTGGCCAAG	102	276.524	p53 CDE Neg		CHRM1	GAAAGGAGCAGCTGGCCAAG	85	493.569	p53 CDE Neg		CHRM1	GAAAGGAGCAGCTGGCCAAG	50	182.924	p53 CDE Neg		CHRM1	GAAAGGAGCAGCTGGCCAAG	12	37.6912	p53 CDE Neg
CHRM1	GAGCACAAAGGAAACCAGCC	37	189.666	p53 CDE Neg		CHRM1	GAGCACAAAGGAAACCAGCC	61	233.965	p53 CDE Neg		CHRM1	GAGCACAAAGGAAACCAGCC	157	438.288	p53 CDE Neg		CHRM1	GAGCACAAAGGAAACCAGCC	181	724.992	p53 CDE Neg		CHRM1	GAGCACAAAGGAAACCAGCC	59	159.95	p53 CDE Neg		CHRM1	GAGCACAAAGGAAACCAGCC	34	197.428	p53 CDE Neg		CHRM1	GAGCACAAAGGAAACCAGCC	6	21.9508	p53 CDE Neg		CHRM1	GAGCACAAAGGAAACCAGCC	9	28.2684	p53 CDE Neg
CHRM1	GCATAAATCCGTGCTGTAAA	46	235.801	p53 CDE Neg		CHRM1	GCATAAATCCGTGCTGTAAA	80	306.839	p53 CDE Neg		CHRM1	GCATAAATCCGTGCTGTAAA	109	304.289	p53 CDE Neg		CHRM1	GCATAAATCCGTGCTGTAAA	64	256.351	p53 CDE Neg		CHRM1	GCATAAATCCGTGCTGTAAA	91	246.703	p53 CDE Neg		CHRM1	GCATAAATCCGTGCTGTAAA	25	145.167	p53 CDE Neg		CHRM1	GCATAAATCCGTGCTGTAAA	0	0	p53 CDE Neg		CHRM1	GCATAAATCCGTGCTGTAAA	7	21.9865	p53 CDE Neg
CHRM1	GCTCCCCAAATACAGTCAAG	56	287.062	p53 CDE Neg		CHRM1	GCTCCCCAAATACAGTCAAG	46	176.432	p53 CDE Neg		CHRM1	GCTCCCCAAATACAGTCAAG	107	298.706	p53 CDE Neg		CHRM1	GCTCCCCAAATACAGTCAAG	78	312.427	p53 CDE Neg		CHRM1	GCTCCCCAAATACAGTCAAG	108	292.79	p53 CDE Neg		CHRM1	GCTCCCCAAATACAGTCAAG	37	214.848	p53 CDE Neg		CHRM1	GCTCCCCAAATACAGTCAAG	8	29.2678	p53 CDE Neg		CHRM1	GCTCCCCAAATACAGTCAAG	15	47.114	p53 CDE Neg
CHRM1	GGAATCCTCCCTTTACAGCA	0	0	p53 CDE Neg		CHRM1	GGAATCCTCCCTTTACAGCA	0	0	p53 CDE Neg		CHRM1	GGAATCCTCCCTTTACAGCA	0	0	p53 CDE Neg		CHRM1	GGAATCCTCCCTTTACAGCA	0	0	p53 CDE Neg		CHRM1	GGAATCCTCCCTTTACAGCA	0	0	p53 CDE Neg		CHRM1	GGAATCCTCCCTTTACAGCA	0	0	p53 CDE Neg		CHRM1	GGAATCCTCCCTTTACAGCA	0	0	p53 CDE Neg		CHRM1	GGAATCCTCCCTTTACAGCA	0	0	p53 CDE Neg
CHRM1	GGTGATCAAGATGCCAATGG	42	215.296	p53 CDE Neg		CHRM1	GGTGATCAAGATGCCAATGG	64	245.471	p53 CDE Neg		CHRM1	GGTGATCAAGATGCCAATGG	135	376.872	p53 CDE Neg		CHRM1	GGTGATCAAGATGCCAATGG	135	540.74	p53 CDE Neg		CHRM1	GGTGATCAAGATGCCAATGG	75	203.326	p53 CDE Neg		CHRM1	GGTGATCAAGATGCCAATGG	63	365.822	p53 CDE Neg		CHRM1	GGTGATCAAGATGCCAATGG	105	384.14	p53 CDE Neg		CHRM1	GGTGATCAAGATGCCAATGG	88	276.402	p53 CDE Neg
CHRM1	GTATTTGGGGAGCTCCGTGG	58	297.314	p53 CDE Neg		CHRM1	GTATTTGGGGAGCTCCGTGG	47	180.268	p53 CDE Neg		CHRM1	GTATTTGGGGAGCTCCGTGG	86	240.081	p53 CDE Neg		CHRM1	GTATTTGGGGAGCTCCGTGG	86	344.471	p53 CDE Neg		CHRM1	GTATTTGGGGAGCTCCGTGG	86	233.148	p53 CDE Neg		CHRM1	GTATTTGGGGAGCTCCGTGG	39	226.461	p53 CDE Neg		CHRM1	GTATTTGGGGAGCTCCGTGG	1929	7057.2	p53 CDE Neg		CHRM1	GTATTTGGGGAGCTCCGTGG	2493	7830.34	p53 CDE Neg
CHRM1	TCTTCTGTGAACCCATTGCG	17	87.1437	p53 CDE Neg		CHRM1	TCTTCTGTGAACCCATTGCG	29	111.229	p53 CDE Neg		CHRM1	TCTTCTGTGAACCCATTGCG	59	164.707	p53 CDE Neg		CHRM1	TCTTCTGTGAACCCATTGCG	61	244.334	p53 CDE Neg		CHRM1	TCTTCTGTGAACCCATTGCG	42	113.863	p53 CDE Neg		CHRM1	TCTTCTGTGAACCCATTGCG	11	63.8736	p53 CDE Neg		CHRM1	TCTTCTGTGAACCCATTGCG	49	179.265	p53 CDE Neg		CHRM1	TCTTCTGTGAACCCATTGCG	10	31.4093	p53 CDE Neg
CHTF18	AATGCCGCCAACCTACCGTG	34	174.287	p53 CDE Pos		CHTF18	AATGCCGCCAACCTACCGTG	54	207.116	p53 CDE Pos		CHTF18	AATGCCGCCAACCTACCGTG	36	100.499	p53 CDE Pos		CHTF18	AATGCCGCCAACCTACCGTG	45	180.247	p53 CDE Pos		CHTF18	AATGCCGCCAACCTACCGTG	79	214.17	p53 CDE Pos		CHTF18	AATGCCGCCAACCTACCGTG	18	104.521	p53 CDE Pos		CHTF18	AATGCCGCCAACCTACCGTG	29	106.096	p53 CDE Pos		CHTF18	AATGCCGCCAACCTACCGTG	39	122.496	p53 CDE Pos
CHTF18	AGCGGCTGGAGCACATCATG	78	399.836	p53 CDE Pos		CHTF18	AGCGGCTGGAGCACATCATG	77	295.333	p53 CDE Pos		CHTF18	AGCGGCTGGAGCACATCATG	66	184.248	p53 CDE Pos		CHTF18	AGCGGCTGGAGCACATCATG	68	272.373	p53 CDE Pos		CHTF18	AGCGGCTGGAGCACATCATG	122	330.744	p53 CDE Pos		CHTF18	AGCGGCTGGAGCACATCATG	80	464.536	p53 CDE Pos		CHTF18	AGCGGCTGGAGCACATCATG	56	204.875	p53 CDE Pos		CHTF18	AGCGGCTGGAGCACATCATG	82	257.556	p53 CDE Pos
CHTF18	CATCGGGCGTGCGCTCCTGG	19	97.3959	p53 CDE Pos		CHTF18	CATCGGGCGTGCGCTCCTGG	48	184.103	p53 CDE Pos		CHTF18	CATCGGGCGTGCGCTCCTGG	16	44.6663	p53 CDE Pos		CHTF18	CATCGGGCGTGCGCTCCTGG	11	44.0603	p53 CDE Pos		CHTF18	CATCGGGCGTGCGCTCCTGG	35	94.8857	p53 CDE Pos		CHTF18	CATCGGGCGTGCGCTCCTGG	10	58.067	p53 CDE Pos		CHTF18	CATCGGGCGTGCGCTCCTGG	0	0	p53 CDE Pos		CHTF18	CATCGGGCGTGCGCTCCTGG	27	84.8051	p53 CDE Pos
CHTF18	CCCCACGCAACCATGAGCAG	89	456.223	p53 CDE Pos		CHTF18	CCCCACGCAACCATGAGCAG	52	199.445	p53 CDE Pos		CHTF18	CCCCACGCAACCATGAGCAG	15	41.8746	p53 CDE Pos		CHTF18	CCCCACGCAACCATGAGCAG	35	140.192	p53 CDE Pos		CHTF18	CCCCACGCAACCATGAGCAG	124	336.166	p53 CDE Pos		CHTF18	CCCCACGCAACCATGAGCAG	65	377.435	p53 CDE Pos		CHTF18	CCCCACGCAACCATGAGCAG	7	25.6093	p53 CDE Pos		CHTF18	CCCCACGCAACCATGAGCAG	136	427.167	p53 CDE Pos
CHTF18	CGTGGCCCCAAAGCTCTGCG	30	153.783	p53 CDE Pos		CHTF18	CGTGGCCCCAAAGCTCTGCG	29	111.229	p53 CDE Pos		CHTF18	CGTGGCCCCAAAGCTCTGCG	49	136.791	p53 CDE Pos		CHTF18	CGTGGCCCCAAAGCTCTGCG	58	232.318	p53 CDE Pos		CHTF18	CGTGGCCCCAAAGCTCTGCG	45	121.996	p53 CDE Pos		CHTF18	CGTGGCCCCAAAGCTCTGCG	20	116.134	p53 CDE Pos		CHTF18	CGTGGCCCCAAAGCTCTGCG	3	10.9754	p53 CDE Pos		CHTF18	CGTGGCCCCAAAGCTCTGCG	45	141.342	p53 CDE Pos
CHTF18	GAGGAACCTGATCCAGACGC	7	35.8827	p53 CDE Pos		CHTF18	GAGGAACCTGATCCAGACGC	11	42.1904	p53 CDE Pos		CHTF18	GAGGAACCTGATCCAGACGC	3	8.37493	p53 CDE Pos		CHTF18	GAGGAACCTGATCCAGACGC	7	28.0384	p53 CDE Pos		CHTF18	GAGGAACCTGATCCAGACGC	16	43.3763	p53 CDE Pos		CHTF18	GAGGAACCTGATCCAGACGC	12	69.6803	p53 CDE Pos		CHTF18	GAGGAACCTGATCCAGACGC	6	21.9508	p53 CDE Pos		CHTF18	GAGGAACCTGATCCAGACGC	0	0	p53 CDE Pos
CHTF18	GCAGAGGGCTCTTCTCGGTG	41	210.17	p53 CDE Pos		CHTF18	GCAGAGGGCTCTTCTCGGTG	14	53.6968	p53 CDE Pos		CHTF18	GCAGAGGGCTCTTCTCGGTG	28	78.166	p53 CDE Pos		CHTF18	GCAGAGGGCTCTTCTCGGTG	23	92.126	p53 CDE Pos		CHTF18	GCAGAGGGCTCTTCTCGGTG	44	119.285	p53 CDE Pos		CHTF18	GCAGAGGGCTCTTCTCGGTG	21	121.941	p53 CDE Pos		CHTF18	GCAGAGGGCTCTTCTCGGTG	3	10.9754	p53 CDE Pos		CHTF18	GCAGAGGGCTCTTCTCGGTG	7	21.9865	p53 CDE Pos
CHTF18	GGAGCACATCATGAGGCGAG	35	179.414	p53 CDE Pos		CHTF18	GGAGCACATCATGAGGCGAG	94	360.536	p53 CDE Pos		CHTF18	GGAGCACATCATGAGGCGAG	110	307.081	p53 CDE Pos		CHTF18	GGAGCACATCATGAGGCGAG	57	228.312	p53 CDE Pos		CHTF18	GGAGCACATCATGAGGCGAG	117	317.189	p53 CDE Pos		CHTF18	GGAGCACATCATGAGGCGAG	22	127.747	p53 CDE Pos		CHTF18	GGAGCACATCATGAGGCGAG	70	256.093	p53 CDE Pos		CHTF18	GGAGCACATCATGAGGCGAG	136	427.167	p53 CDE Pos
CHTF18	GGCCTCCTCGAACGTCCGCG	40	205.044	p53 CDE Pos		CHTF18	GGCCTCCTCGAACGTCCGCG	41	157.255	p53 CDE Pos		CHTF18	GGCCTCCTCGAACGTCCGCG	43	120.041	p53 CDE Pos		CHTF18	GGCCTCCTCGAACGTCCGCG	45	180.247	p53 CDE Pos		CHTF18	GGCCTCCTCGAACGTCCGCG	79	214.17	p53 CDE Pos		CHTF18	GGCCTCCTCGAACGTCCGCG	36	209.041	p53 CDE Pos		CHTF18	GGCCTCCTCGAACGTCCGCG	1	3.65847	p53 CDE Pos		CHTF18	GGCCTCCTCGAACGTCCGCG	0	0	p53 CDE Pos
CHTF18	TCAGCCACTTGAGCAGGCAG	49	251.179	p53 CDE Pos		CHTF18	TCAGCCACTTGAGCAGGCAG	69	264.649	p53 CDE Pos		CHTF18	TCAGCCACTTGAGCAGGCAG	52	145.165	p53 CDE Pos		CHTF18	TCAGCCACTTGAGCAGGCAG	13	52.0712	p53 CDE Pos		CHTF18	TCAGCCACTTGAGCAGGCAG	90	243.992	p53 CDE Pos		CHTF18	TCAGCCACTTGAGCAGGCAG	59	342.595	p53 CDE Pos		CHTF18	TCAGCCACTTGAGCAGGCAG	0	0	p53 CDE Pos		CHTF18	TCAGCCACTTGAGCAGGCAG	0	0	p53 CDE Pos
CISD1	ACAAAACATAACGAAGAGAC	0	0	p53 CDE Neutral		CISD1	ACAAAACATAACGAAGAGAC	3	11.5065	p53 CDE Neutral		CISD1	ACAAAACATAACGAAGAGAC	0	0	p53 CDE Neutral		CISD1	ACAAAACATAACGAAGAGAC	6	24.0329	p53 CDE Neutral		CISD1	ACAAAACATAACGAAGAGAC	17	46.0873	p53 CDE Neutral		CISD1	ACAAAACATAACGAAGAGAC	2	11.6134	p53 CDE Neutral		CISD1	ACAAAACATAACGAAGAGAC	0	0	p53 CDE Neutral		CISD1	ACAAAACATAACGAAGAGAC	0	0	p53 CDE Neutral
CISD1	ACTTCCAGTTCCAGCGTACG	46	235.801	p53 CDE Neutral		CISD1	ACTTCCAGTTCCAGCGTACG	85	326.017	p53 CDE Neutral		CISD1	ACTTCCAGTTCCAGCGTACG	33	92.1242	p53 CDE Neutral		CISD1	ACTTCCAGTTCCAGCGTACG	30	120.164	p53 CDE Neutral		CISD1	ACTTCCAGTTCCAGCGTACG	104	281.946	p53 CDE Neutral		CISD1	ACTTCCAGTTCCAGCGTACG	41	238.074	p53 CDE Neutral		CISD1	ACTTCCAGTTCCAGCGTACG	1	3.65847	p53 CDE Neutral		CISD1	ACTTCCAGTTCCAGCGTACG	0	0	p53 CDE Neutral
CISD1	AGTACATGCTTTTGACATGG	0	0	p53 CDE Neutral		CISD1	AGTACATGCTTTTGACATGG	0	0	p53 CDE Neutral		CISD1	AGTACATGCTTTTGACATGG	0	0	p53 CDE Neutral		CISD1	AGTACATGCTTTTGACATGG	0	0	p53 CDE Neutral		CISD1	AGTACATGCTTTTGACATGG	0	0	p53 CDE Neutral		CISD1	AGTACATGCTTTTGACATGG	0	0	p53 CDE Neutral		CISD1	AGTACATGCTTTTGACATGG	0	0	p53 CDE Neutral		CISD1	AGTACATGCTTTTGACATGG	0	0	p53 CDE Neutral
CISD1	CAGCAGTTACCATTGCTGCT	28	143.531	p53 CDE Neutral		CISD1	CAGCAGTTACCATTGCTGCT	25	95.8872	p53 CDE Neutral		CISD1	CAGCAGTTACCATTGCTGCT	37	103.291	p53 CDE Neutral		CISD1	CAGCAGTTACCATTGCTGCT	37	148.203	p53 CDE Neutral		CISD1	CAGCAGTTACCATTGCTGCT	50	135.551	p53 CDE Neutral		CISD1	CAGCAGTTACCATTGCTGCT	23	133.554	p53 CDE Neutral		CISD1	CAGCAGTTACCATTGCTGCT	0	0	p53 CDE Neutral		CISD1	CAGCAGTTACCATTGCTGCT	2	6.28186	p53 CDE Neutral
CISD1	CCCCACTTCACCTCGTACGC	11	56.3871	p53 CDE Neutral		CISD1	CCCCACTTCACCTCGTACGC	17	65.2033	p53 CDE Neutral		CISD1	CCCCACTTCACCTCGTACGC	3	8.37493	p53 CDE Neutral		CISD1	CCCCACTTCACCTCGTACGC	0	0	p53 CDE Neutral		CISD1	CCCCACTTCACCTCGTACGC	26	70.4865	p53 CDE Neutral		CISD1	CCCCACTTCACCTCGTACGC	3	17.4201	p53 CDE Neutral		CISD1	CCCCACTTCACCTCGTACGC	0	0	p53 CDE Neutral		CISD1	CCCCACTTCACCTCGTACGC	4	12.5637	p53 CDE Neutral
CISD1	CCTTCCCTGCTCTAGTTGAA	40	205.044	p53 CDE Neutral		CISD1	CCTTCCCTGCTCTAGTTGAA	46	176.432	p53 CDE Neutral		CISD1	CCTTCCCTGCTCTAGTTGAA	133	371.289	p53 CDE Neutral		CISD1	CCTTCCCTGCTCTAGTTGAA	112	448.614	p53 CDE Neutral		CISD1	CCTTCCCTGCTCTAGTTGAA	138	374.121	p53 CDE Neutral		CISD1	CCTTCCCTGCTCTAGTTGAA	69	400.662	p53 CDE Neutral		CISD1	CCTTCCCTGCTCTAGTTGAA	9	32.9263	p53 CDE Neutral		CISD1	CCTTCCCTGCTCTAGTTGAA	22	69.1005	p53 CDE Neutral
CISD1	CGAAGAGACTGGAGACAATG	90	461.349	p53 CDE Neutral		CISD1	CGAAGAGACTGGAGACAATG	117	448.752	p53 CDE Neutral		CISD1	CGAAGAGACTGGAGACAATG	139	388.038	p53 CDE Neutral		CISD1	CGAAGAGACTGGAGACAATG	126	504.69	p53 CDE Neutral		CISD1	CGAAGAGACTGGAGACAATG	189	512.383	p53 CDE Neutral		CISD1	CGAAGAGACTGGAGACAATG	67	389.049	p53 CDE Neutral		CISD1	CGAAGAGACTGGAGACAATG	89	325.604	p53 CDE Neutral		CISD1	CGAAGAGACTGGAGACAATG	78	244.993	p53 CDE Neutral
CISD1	CTGTGTACTGCCGTTGTTGG	44	225.548	p53 CDE Neutral		CISD1	CTGTGTACTGCCGTTGTTGG	54	207.116	p53 CDE Neutral		CISD1	CTGTGTACTGCCGTTGTTGG	106	295.914	p53 CDE Neutral		CISD1	CTGTGTACTGCCGTTGTTGG	64	256.351	p53 CDE Neutral		CISD1	CTGTGTACTGCCGTTGTTGG	68	184.349	p53 CDE Neutral		CISD1	CTGTGTACTGCCGTTGTTGG	47	272.915	p53 CDE Neutral		CISD1	CTGTGTACTGCCGTTGTTGG	30	109.754	p53 CDE Neutral		CISD1	CTGTGTACTGCCGTTGTTGG	11	34.5502	p53 CDE Neutral
CISD1	GATAGTACATGCTTTTGACA	0	0	p53 CDE Neutral		CISD1	GATAGTACATGCTTTTGACA	0	0	p53 CDE Neutral		CISD1	GATAGTACATGCTTTTGACA	0	0	p53 CDE Neutral		CISD1	GATAGTACATGCTTTTGACA	0	0	p53 CDE Neutral		CISD1	GATAGTACATGCTTTTGACA	0	0	p53 CDE Neutral		CISD1	GATAGTACATGCTTTTGACA	0	0	p53 CDE Neutral		CISD1	GATAGTACATGCTTTTGACA	0	0	p53 CDE Neutral		CISD1	GATAGTACATGCTTTTGACA	0	0	p53 CDE Neutral
CISD1	TCTTTTTTCTTGATGATCAG	0	0	p53 CDE Neutral		CISD1	TCTTTTTTCTTGATGATCAG	0	0	p53 CDE Neutral		CISD1	TCTTTTTTCTTGATGATCAG	0	0	p53 CDE Neutral		CISD1	TCTTTTTTCTTGATGATCAG	0	0	p53 CDE Neutral		CISD1	TCTTTTTTCTTGATGATCAG	0	0	p53 CDE Neutral		CISD1	TCTTTTTTCTTGATGATCAG	0	0	p53 CDE Neutral		CISD1	TCTTTTTTCTTGATGATCAG	0	0	p53 CDE Neutral		CISD1	TCTTTTTTCTTGATGATCAG	0	0	p53 CDE Neutral
COG3	AAAACAATGGCCAGTCAGGG	57	292.188	p53 CDE Pos		COG3	AAAACAATGGCCAGTCAGGG	67	256.978	p53 CDE Pos		COG3	AAAACAATGGCCAGTCAGGG	141	393.622	p53 CDE Pos		COG3	AAAACAATGGCCAGTCAGGG	37	148.203	p53 CDE Pos		COG3	AAAACAATGGCCAGTCAGGG	77	208.748	p53 CDE Pos		COG3	AAAACAATGGCCAGTCAGGG	47	272.915	p53 CDE Pos		COG3	AAAACAATGGCCAGTCAGGG	70	256.093	p53 CDE Pos		COG3	AAAACAATGGCCAGTCAGGG	23	72.2414	p53 CDE Pos
COG3	ACATTGTCGGTGAATAGTGA	8	41.0088	p53 CDE Pos		COG3	ACATTGTCGGTGAATAGTGA	38	145.749	p53 CDE Pos		COG3	ACATTGTCGGTGAATAGTGA	29	80.9576	p53 CDE Pos		COG3	ACATTGTCGGTGAATAGTGA	22	88.1205	p53 CDE Pos		COG3	ACATTGTCGGTGAATAGTGA	29	78.6195	p53 CDE Pos		COG3	ACATTGTCGGTGAATAGTGA	19	110.327	p53 CDE Pos		COG3	ACATTGTCGGTGAATAGTGA	0	0	p53 CDE Pos		COG3	ACATTGTCGGTGAATAGTGA	0	0	p53 CDE Pos
COG3	ACTCTTCCTTTAACAGAGCG	38	194.792	p53 CDE Pos		COG3	ACTCTTCCTTTAACAGAGCG	55	210.952	p53 CDE Pos		COG3	ACTCTTCCTTTAACAGAGCG	52	145.165	p53 CDE Pos		COG3	ACTCTTCCTTTAACAGAGCG	74	296.405	p53 CDE Pos		COG3	ACTCTTCCTTTAACAGAGCG	80	216.882	p53 CDE Pos		COG3	ACTCTTCCTTTAACAGAGCG	55	319.368	p53 CDE Pos		COG3	ACTCTTCCTTTAACAGAGCG	2	7.31695	p53 CDE Pos		COG3	ACTCTTCCTTTAACAGAGCG	10	31.4093	p53 CDE Pos
COG3	AGGTTTAAACAAGATGAACT	92	471.601	p53 CDE Pos		COG3	AGGTTTAAACAAGATGAACT	90	345.194	p53 CDE Pos		COG3	AGGTTTAAACAAGATGAACT	91	254.04	p53 CDE Pos		COG3	AGGTTTAAACAAGATGAACT	129	516.707	p53 CDE Pos		COG3	AGGTTTAAACAAGATGAACT	140	379.543	p53 CDE Pos		COG3	AGGTTTAAACAAGATGAACT	60	348.402	p53 CDE Pos		COG3	AGGTTTAAACAAGATGAACT	139	508.528	p53 CDE Pos		COG3	AGGTTTAAACAAGATGAACT	96	301.529	p53 CDE Pos
COG3	GACATACTTCTCAATGTCAC	10	51.261	p53 CDE Pos		COG3	GACATACTTCTCAATGTCAC	41	157.255	p53 CDE Pos		COG3	GACATACTTCTCAATGTCAC	101	281.956	p53 CDE Pos		COG3	GACATACTTCTCAATGTCAC	33	132.181	p53 CDE Pos		COG3	GACATACTTCTCAATGTCAC	28	75.9085	p53 CDE Pos		COG3	GACATACTTCTCAATGTCAC	14	81.2937	p53 CDE Pos		COG3	GACATACTTCTCAATGTCAC	10	36.5847	p53 CDE Pos		COG3	GACATACTTCTCAATGTCAC	3	9.42279	p53 CDE Pos
COG3	GCTGTTTGTAGAACAGCTGG	80	410.088	p53 CDE Pos		COG3	GCTGTTTGTAGAACAGCTGG	123	471.765	p53 CDE Pos		COG3	GCTGTTTGTAGAACAGCTGG	77	214.957	p53 CDE Pos		COG3	GCTGTTTGTAGAACAGCTGG	69	276.378	p53 CDE Pos		COG3	GCTGTTTGTAGAACAGCTGG	140	379.543	p53 CDE Pos		COG3	GCTGTTTGTAGAACAGCTGG	69	400.662	p53 CDE Pos		COG3	GCTGTTTGTAGAACAGCTGG	13	47.5602	p53 CDE Pos		COG3	GCTGTTTGTAGAACAGCTGG	7	21.9865	p53 CDE Pos
COG3	GGATCGGAGACCGGACACGA	17	87.1437	p53 CDE Pos		COG3	GGATCGGAGACCGGACACGA	20	76.7098	p53 CDE Pos		COG3	GGATCGGAGACCGGACACGA	0	0	p53 CDE Pos		COG3	GGATCGGAGACCGGACACGA	0	0	p53 CDE Pos		COG3	GGATCGGAGACCGGACACGA	42	113.863	p53 CDE Pos		COG3	GGATCGGAGACCGGACACGA	12	69.6803	p53 CDE Pos		COG3	GGATCGGAGACCGGACACGA	0	0	p53 CDE Pos		COG3	GGATCGGAGACCGGACACGA	0	0	p53 CDE Pos
COG3	GGTATTGGAGCTGAAGGCGG	27	138.405	p53 CDE Pos		COG3	GGTATTGGAGCTGAAGGCGG	30	115.065	p53 CDE Pos		COG3	GGTATTGGAGCTGAAGGCGG	41	114.457	p53 CDE Pos		COG3	GGTATTGGAGCTGAAGGCGG	8	32.0438	p53 CDE Pos		COG3	GGTATTGGAGCTGAAGGCGG	44	119.285	p53 CDE Pos		COG3	GGTATTGGAGCTGAAGGCGG	35	203.234	p53 CDE Pos		COG3	GGTATTGGAGCTGAAGGCGG	22	80.4864	p53 CDE Pos		COG3	GGTATTGGAGCTGAAGGCGG	20	62.8186	p53 CDE Pos
COG3	TCTTATATGCAGTTGCCGCA	43	220.422	p53 CDE Pos		COG3	TCTTATATGCAGTTGCCGCA	72	276.155	p53 CDE Pos		COG3	TCTTATATGCAGTTGCCGCA	249	695.119	p53 CDE Pos		COG3	TCTTATATGCAGTTGCCGCA	109	436.597	p53 CDE Pos		COG3	TCTTATATGCAGTTGCCGCA	132	357.854	p53 CDE Pos		COG3	TCTTATATGCAGTTGCCGCA	58	336.788	p53 CDE Pos		COG3	TCTTATATGCAGTTGCCGCA	17	62.1941	p53 CDE Pos		COG3	TCTTATATGCAGTTGCCGCA	22	69.1005	p53 CDE Pos
COG3	TTATTGAACAAATAGAACTG	31	158.909	p53 CDE Pos		COG3	TTATTGAACAAATAGAACTG	30	115.065	p53 CDE Pos		COG3	TTATTGAACAAATAGAACTG	63	175.874	p53 CDE Pos		COG3	TTATTGAACAAATAGAACTG	90	360.493	p53 CDE Pos		COG3	TTATTGAACAAATAGAACTG	53	143.684	p53 CDE Pos		COG3	TTATTGAACAAATAGAACTG	20	116.134	p53 CDE Pos		COG3	TTATTGAACAAATAGAACTG	0	0	p53 CDE Pos		COG3	TTATTGAACAAATAGAACTG	0	0	p53 CDE Pos
COMMD3	AATTCCCTAGAAATCCTACT	14	71.7654	p53 CDE Pos		COMMD3	AATTCCCTAGAAATCCTACT	21	80.5453	p53 CDE Pos		COMMD3	AATTCCCTAGAAATCCTACT	82	228.915	p53 CDE Pos		COMMD3	AATTCCCTAGAAATCCTACT	28	112.153	p53 CDE Pos		COMMD3	AATTCCCTAGAAATCCTACT	41	111.152	p53 CDE Pos		COMMD3	AATTCCCTAGAAATCCTACT	22	127.747	p53 CDE Pos		COMMD3	AATTCCCTAGAAATCCTACT	12	43.9017	p53 CDE Pos		COMMD3	AATTCCCTAGAAATCCTACT	0	0	p53 CDE Pos
COMMD3	ACAACTGAGTTGCTCTTTCC	70	358.827	p53 CDE Pos		COMMD3	ACAACTGAGTTGCTCTTTCC	105	402.726	p53 CDE Pos		COMMD3	ACAACTGAGTTGCTCTTTCC	123	343.372	p53 CDE Pos		COMMD3	ACAACTGAGTTGCTCTTTCC	45	180.247	p53 CDE Pos		COMMD3	ACAACTGAGTTGCTCTTTCC	124	336.166	p53 CDE Pos		COMMD3	ACAACTGAGTTGCTCTTTCC	68	394.855	p53 CDE Pos		COMMD3	ACAACTGAGTTGCTCTTTCC	21	76.828	p53 CDE Pos		COMMD3	ACAACTGAGTTGCTCTTTCC	108	339.22	p53 CDE Pos
COMMD3	CTTCACGCTTCTCCTCCGGG	62	317.818	p53 CDE Pos		COMMD3	CTTCACGCTTCTCCTCCGGG	38	145.749	p53 CDE Pos		COMMD3	CTTCACGCTTCTCCTCCGGG	55	153.54	p53 CDE Pos		COMMD3	CTTCACGCTTCTCCTCCGGG	27	108.148	p53 CDE Pos		COMMD3	CTTCACGCTTCTCCTCCGGG	91	246.703	p53 CDE Pos		COMMD3	CTTCACGCTTCTCCTCCGGG	44	255.495	p53 CDE Pos		COMMD3	CTTCACGCTTCTCCTCCGGG	7	25.6093	p53 CDE Pos		COMMD3	CTTCACGCTTCTCCTCCGGG	14	43.973	p53 CDE Pos
COMMD3	CTTGAAACATATCGACCCAG	0	0	p53 CDE Pos		COMMD3	CTTGAAACATATCGACCCAG	0	0	p53 CDE Pos		COMMD3	CTTGAAACATATCGACCCAG	0	0	p53 CDE Pos		COMMD3	CTTGAAACATATCGACCCAG	0	0	p53 CDE Pos		COMMD3	CTTGAAACATATCGACCCAG	0	0	p53 CDE Pos		COMMD3	CTTGAAACATATCGACCCAG	0	0	p53 CDE Pos		COMMD3	CTTGAAACATATCGACCCAG	0	0	p53 CDE Pos		COMMD3	CTTGAAACATATCGACCCAG	0	0	p53 CDE Pos
COMMD3	GAGTCTGCTGGACGCCCAGG	29	148.657	p53 CDE Pos		COMMD3	GAGTCTGCTGGACGCCCAGG	34	130.407	p53 CDE Pos		COMMD3	GAGTCTGCTGGACGCCCAGG	73	203.79	p53 CDE Pos		COMMD3	GAGTCTGCTGGACGCCCAGG	19	76.1041	p53 CDE Pos		COMMD3	GAGTCTGCTGGACGCCCAGG	76	206.037	p53 CDE Pos		COMMD3	GAGTCTGCTGGACGCCCAGG	32	185.814	p53 CDE Pos		COMMD3	GAGTCTGCTGGACGCCCAGG	1	3.65847	p53 CDE Pos		COMMD3	GAGTCTGCTGGACGCCCAGG	0	0	p53 CDE Pos
COMMD3	GCAGACTCTGGAATGCCGCC	24	123.026	p53 CDE Pos		COMMD3	GCAGACTCTGGAATGCCGCC	23	88.2162	p53 CDE Pos		COMMD3	GCAGACTCTGGAATGCCGCC	17	47.4579	p53 CDE Pos		COMMD3	GCAGACTCTGGAATGCCGCC	16	64.0877	p53 CDE Pos		COMMD3	GCAGACTCTGGAATGCCGCC	46	124.707	p53 CDE Pos		COMMD3	GCAGACTCTGGAATGCCGCC	23	133.554	p53 CDE Pos		COMMD3	GCAGACTCTGGAATGCCGCC	0	0	p53 CDE Pos		COMMD3	GCAGACTCTGGAATGCCGCC	3	9.42279	p53 CDE Pos
COMMD3	TAAAGATGCTTCGAAAAGCC	36	184.54	p53 CDE Pos		COMMD3	TAAAGATGCTTCGAAAAGCC	28	107.394	p53 CDE Pos		COMMD3	TAAAGATGCTTCGAAAAGCC	124	346.164	p53 CDE Pos		COMMD3	TAAAGATGCTTCGAAAAGCC	154	616.844	p53 CDE Pos		COMMD3	TAAAGATGCTTCGAAAAGCC	27	73.1975	p53 CDE Pos		COMMD3	TAAAGATGCTTCGAAAAGCC	27	156.781	p53 CDE Pos		COMMD3	TAAAGATGCTTCGAAAAGCC	4	14.6339	p53 CDE Pos		COMMD3	TAAAGATGCTTCGAAAAGCC	17	53.3958	p53 CDE Pos
COMMD3	CAAGAAACATCCGTTATATG	24	123.026	p53 CDE Pos		COMMD3	CAAGAAACATCCGTTATATG	21	80.5453	p53 CDE Pos		COMMD3	CAAGAAACATCCGTTATATG	6	16.7499	p53 CDE Pos		COMMD3	CAAGAAACATCCGTTATATG	8	32.0438	p53 CDE Pos		COMMD3	CAAGAAACATCCGTTATATG	32	86.7526	p53 CDE Pos		COMMD3	CAAGAAACATCCGTTATATG	21	121.941	p53 CDE Pos		COMMD3	CAAGAAACATCCGTTATATG	0	0	p53 CDE Pos		COMMD3	CAAGAAACATCCGTTATATG	5	15.7047	p53 CDE Pos
COMMD3	AGCTGCAACTTACATACTAG	79	404.962	p53 CDE Pos		COMMD3	AGCTGCAACTTACATACTAG	46	176.432	p53 CDE Pos		COMMD3	AGCTGCAACTTACATACTAG	15	41.8746	p53 CDE Pos		COMMD3	AGCTGCAACTTACATACTAG	30	120.164	p53 CDE Pos		COMMD3	AGCTGCAACTTACATACTAG	102	276.524	p53 CDE Pos		COMMD3	AGCTGCAACTTACATACTAG	36	209.041	p53 CDE Pos		COMMD3	AGCTGCAACTTACATACTAG	6	21.9508	p53 CDE Pos		COMMD3	AGCTGCAACTTACATACTAG	37	116.214	p53 CDE Pos
COMMD3	CTTGAAACATATCGACCCAG	0	0	p53 CDE Pos		COMMD3	CTTGAAACATATCGACCCAG	0	0	p53 CDE Pos		COMMD3	CTTGAAACATATCGACCCAG	0	0	p53 CDE Pos		COMMD3	CTTGAAACATATCGACCCAG	0	0	p53 CDE Pos		COMMD3	CTTGAAACATATCGACCCAG	0	0	p53 CDE Pos		COMMD3	CTTGAAACATATCGACCCAG	0	0	p53 CDE Pos		COMMD3	CTTGAAACATATCGACCCAG	0	0	p53 CDE Pos		COMMD3	CTTGAAACATATCGACCCAG	0	0	p53 CDE Pos
COMMD3	GCGTTGGAGTCGAAGGAGCG	66	338.323	p53 CDE Pos		COMMD3	GCGTTGGAGTCGAAGGAGCG	58	222.458	p53 CDE Pos		COMMD3	GCGTTGGAGTCGAAGGAGCG	59	164.707	p53 CDE Pos		COMMD3	GCGTTGGAGTCGAAGGAGCG	49	196.268	p53 CDE Pos		COMMD3	GCGTTGGAGTCGAAGGAGCG	98	265.68	p53 CDE Pos		COMMD3	GCGTTGGAGTCGAAGGAGCG	58	336.788	p53 CDE Pos		COMMD3	GCGTTGGAGTCGAAGGAGCG	3	10.9754	p53 CDE Pos		COMMD3	GCGTTGGAGTCGAAGGAGCG	3	9.42279	p53 CDE Pos
COMMD3	GCCGAGCGGCTTACCTAACA	57	292.188	p53 CDE Pos		COMMD3	GCCGAGCGGCTTACCTAACA	91	349.029	p53 CDE Pos		COMMD3	GCCGAGCGGCTTACCTAACA	197	549.954	p53 CDE Pos		COMMD3	GCCGAGCGGCTTACCTAACA	84	336.46	p53 CDE Pos		COMMD3	GCCGAGCGGCTTACCTAACA	136	368.699	p53 CDE Pos		COMMD3	GCCGAGCGGCTTACCTAACA	61	354.208	p53 CDE Pos		COMMD3	GCCGAGCGGCTTACCTAACA	179	654.867	p53 CDE Pos		COMMD3	GCCGAGCGGCTTACCTAACA	155	486.844	p53 CDE Pos
COMMD3	GAGCTGACAAGTCAACTCTA	16	82.0176	p53 CDE Pos		COMMD3	GAGCTGACAAGTCAACTCTA	46	176.432	p53 CDE Pos		COMMD3	GAGCTGACAAGTCAACTCTA	36	100.499	p53 CDE Pos		COMMD3	GAGCTGACAAGTCAACTCTA	28	112.153	p53 CDE Pos		COMMD3	GAGCTGACAAGTCAACTCTA	77	208.748	p53 CDE Pos		COMMD3	GAGCTGACAAGTCAACTCTA	49	284.528	p53 CDE Pos		COMMD3	GAGCTGACAAGTCAACTCTA	36	131.705	p53 CDE Pos		COMMD3	GAGCTGACAAGTCAACTCTA	1	3.14093	p53 CDE Pos
COQ2	AAAAGTTGAAATGTCTCCAG	40	205.044	p53 CDE Pos		COQ2	AAAAGTTGAAATGTCTCCAG	51	195.61	p53 CDE Pos		COQ2	AAAAGTTGAAATGTCTCCAG	12	33.4997	p53 CDE Pos		COQ2	AAAAGTTGAAATGTCTCCAG	16	64.0877	p53 CDE Pos		COQ2	AAAAGTTGAAATGTCTCCAG	47	127.418	p53 CDE Pos		COQ2	AAAAGTTGAAATGTCTCCAG	20	116.134	p53 CDE Pos		COQ2	AAAAGTTGAAATGTCTCCAG	0	0	p53 CDE Pos		COQ2	AAAAGTTGAAATGTCTCCAG	0	0	p53 CDE Pos
COQ2	AATACCAAGCCGTGGCTCAG	37	189.666	p53 CDE Pos		COQ2	AATACCAAGCCGTGGCTCAG	41	157.255	p53 CDE Pos		COQ2	AATACCAAGCCGTGGCTCAG	4	11.1666	p53 CDE Pos		COQ2	AATACCAAGCCGTGGCTCAG	7	28.0384	p53 CDE Pos		COQ2	AATACCAAGCCGTGGCTCAG	60	162.661	p53 CDE Pos		COQ2	AATACCAAGCCGTGGCTCAG	27	156.781	p53 CDE Pos		COQ2	AATACCAAGCCGTGGCTCAG	7	25.6093	p53 CDE Pos		COQ2	AATACCAAGCCGTGGCTCAG	0	0	p53 CDE Pos
COQ2	AGCCTAGTGGGTGTGAACAG	95	486.98	p53 CDE Pos		COQ2	AGCCTAGTGGGTGTGAACAG	69	264.649	p53 CDE Pos		COQ2	AGCCTAGTGGGTGTGAACAG	55	153.54	p53 CDE Pos		COQ2	AGCCTAGTGGGTGTGAACAG	43	172.236	p53 CDE Pos		COQ2	AGCCTAGTGGGTGTGAACAG	152	412.075	p53 CDE Pos		COQ2	AGCCTAGTGGGTGTGAACAG	65	377.435	p53 CDE Pos		COQ2	AGCCTAGTGGGTGTGAACAG	7	25.6093	p53 CDE Pos		COQ2	AGCCTAGTGGGTGTGAACAG	4	12.5637	p53 CDE Pos
COQ2	CAGGCCCCGCGCGAACCCCG	26	133.279	p53 CDE Pos		COQ2	CAGGCCCCGCGCGAACCCCG	47	180.268	p53 CDE Pos		COQ2	CAGGCCCCGCGCGAACCCCG	1	2.79164	p53 CDE Pos		COQ2	CAGGCCCCGCGCGAACCCCG	9	36.0493	p53 CDE Pos		COQ2	CAGGCCCCGCGCGAACCCCG	52	140.973	p53 CDE Pos		COQ2	CAGGCCCCGCGCGAACCCCG	23	133.554	p53 CDE Pos		COQ2	CAGGCCCCGCGCGAACCCCG	2	7.31695	p53 CDE Pos		COQ2	CAGGCCCCGCGCGAACCCCG	5	15.7047	p53 CDE Pos
COQ2	CCCGCCTGTCCCGAGCCGCG	24	123.026	p53 CDE Pos		COQ2	CCCGCCTGTCCCGAGCCGCG	67	256.978	p53 CDE Pos		COQ2	CCCGCCTGTCCCGAGCCGCG	32	89.3326	p53 CDE Pos		COQ2	CCCGCCTGTCCCGAGCCGCG	41	164.225	p53 CDE Pos		COQ2	CCCGCCTGTCCCGAGCCGCG	69	187.06	p53 CDE Pos		COQ2	CCCGCCTGTCCCGAGCCGCG	38	220.654	p53 CDE Pos		COQ2	CCCGCCTGTCCCGAGCCGCG	7	25.6093	p53 CDE Pos		COQ2	CCCGCCTGTCCCGAGCCGCG	0	0	p53 CDE Pos
COQ2	CTGTCCCCCAAGAAAAACAA	16	82.0176	p53 CDE Pos		COQ2	CTGTCCCCCAAGAAAAACAA	21	80.5453	p53 CDE Pos		COQ2	CTGTCCCCCAAGAAAAACAA	35	97.7075	p53 CDE Pos		COQ2	CTGTCCCCCAAGAAAAACAA	25	100.137	p53 CDE Pos		COQ2	CTGTCCCCCAAGAAAAACAA	41	111.152	p53 CDE Pos		COQ2	CTGTCCCCCAAGAAAAACAA	24	139.361	p53 CDE Pos		COQ2	CTGTCCCCCAAGAAAAACAA	11	40.2432	p53 CDE Pos		COQ2	CTGTCCCCCAAGAAAAACAA	0	0	p53 CDE Pos
COQ2	GCGCCAGCTCAGTTTGTCCG	21	107.648	p53 CDE Pos		COQ2	GCGCCAGCTCAGTTTGTCCG	37	141.913	p53 CDE Pos		COQ2	GCGCCAGCTCAGTTTGTCCG	72	200.998	p53 CDE Pos		COQ2	GCGCCAGCTCAGTTTGTCCG	12	48.0658	p53 CDE Pos		COQ2	GCGCCAGCTCAGTTTGTCCG	33	89.4636	p53 CDE Pos		COQ2	GCGCCAGCTCAGTTTGTCCG	6	34.8402	p53 CDE Pos		COQ2	GCGCCAGCTCAGTTTGTCCG	0	0	p53 CDE Pos		COQ2	GCGCCAGCTCAGTTTGTCCG	0	0	p53 CDE Pos
COQ2	TAAAGAGGCAGGCAAACAGA	45	230.675	p53 CDE Pos		COQ2	TAAAGAGGCAGGCAAACAGA	42	161.091	p53 CDE Pos		COQ2	TAAAGAGGCAGGCAAACAGA	47	131.207	p53 CDE Pos		COQ2	TAAAGAGGCAGGCAAACAGA	38	152.208	p53 CDE Pos		COQ2	TAAAGAGGCAGGCAAACAGA	64	173.505	p53 CDE Pos		COQ2	TAAAGAGGCAGGCAAACAGA	30	174.201	p53 CDE Pos		COQ2	TAAAGAGGCAGGCAAACAGA	8	29.2678	p53 CDE Pos		COQ2	TAAAGAGGCAGGCAAACAGA	0	0	p53 CDE Pos
COQ2	TCGGAGAAAATACCAAGCCG	46	235.801	p53 CDE Pos		COQ2	TCGGAGAAAATACCAAGCCG	49	187.939	p53 CDE Pos		COQ2	TCGGAGAAAATACCAAGCCG	11	30.7081	p53 CDE Pos		COQ2	TCGGAGAAAATACCAAGCCG	12	48.0658	p53 CDE Pos		COQ2	TCGGAGAAAATACCAAGCCG	82	222.304	p53 CDE Pos		COQ2	TCGGAGAAAATACCAAGCCG	36	209.041	p53 CDE Pos		COQ2	TCGGAGAAAATACCAAGCCG	7	25.6093	p53 CDE Pos		COQ2	TCGGAGAAAATACCAAGCCG	0	0	p53 CDE Pos
COQ2	TGCTGGGCTCGCGAGCCGCG	34	174.287	p53 CDE Pos		COQ2	TGCTGGGCTCGCGAGCCGCG	52	199.445	p53 CDE Pos		COQ2	TGCTGGGCTCGCGAGCCGCG	35	97.7075	p53 CDE Pos		COQ2	TGCTGGGCTCGCGAGCCGCG	34	136.186	p53 CDE Pos		COQ2	TGCTGGGCTCGCGAGCCGCG	59	159.95	p53 CDE Pos		COQ2	TGCTGGGCTCGCGAGCCGCG	30	174.201	p53 CDE Pos		COQ2	TGCTGGGCTCGCGAGCCGCG	0	0	p53 CDE Pos		COQ2	TGCTGGGCTCGCGAGCCGCG	16	50.2549	p53 CDE Pos
COQ4	AACGGAGATACTCGCGACCG	44	225.548	p53 CDE Pos		COQ4	AACGGAGATACTCGCGACCG	77	295.333	p53 CDE Pos		COQ4	AACGGAGATACTCGCGACCG	170	474.579	p53 CDE Pos		COQ4	AACGGAGATACTCGCGACCG	112	448.614	p53 CDE Pos		COQ4	AACGGAGATACTCGCGACCG	130	352.432	p53 CDE Pos		COQ4	AACGGAGATACTCGCGACCG	43	249.688	p53 CDE Pos		COQ4	AACGGAGATACTCGCGACCG	17	62.1941	p53 CDE Pos		COQ4	AACGGAGATACTCGCGACCG	31	97.3688	p53 CDE Pos
COQ4	AAGCTCCAGAGCCTGCCGGA	37	189.666	p53 CDE Pos		COQ4	AAGCTCCAGAGCCTGCCGGA	39	149.584	p53 CDE Pos		COQ4	AAGCTCCAGAGCCTGCCGGA	25	69.7911	p53 CDE Pos		COQ4	AAGCTCCAGAGCCTGCCGGA	45	180.247	p53 CDE Pos		COQ4	AAGCTCCAGAGCCTGCCGGA	68	184.349	p53 CDE Pos		COQ4	AAGCTCCAGAGCCTGCCGGA	19	110.327	p53 CDE Pos		COQ4	AAGCTCCAGAGCCTGCCGGA	0	0	p53 CDE Pos		COQ4	AAGCTCCAGAGCCTGCCGGA	1	3.14093	p53 CDE Pos
COQ4	AGCTAGCGTATGTGATTCAG	81	415.214	p53 CDE Pos		COQ4	AGCTAGCGTATGTGATTCAG	69	264.649	p53 CDE Pos		COQ4	AGCTAGCGTATGTGATTCAG	130	362.914	p53 CDE Pos		COQ4	AGCTAGCGTATGTGATTCAG	73	292.4	p53 CDE Pos		COQ4	AGCTAGCGTATGTGATTCAG	111	300.923	p53 CDE Pos		COQ4	AGCTAGCGTATGTGATTCAG	37	214.848	p53 CDE Pos		COQ4	AGCTAGCGTATGTGATTCAG	0	0	p53 CDE Pos		COQ4	AGCTAGCGTATGTGATTCAG	5	15.7047	p53 CDE Pos
COQ4	AGGGTGGATGTCGAAATCCG	34	174.287	p53 CDE Pos		COQ4	AGGGTGGATGTCGAAATCCG	75	287.662	p53 CDE Pos		COQ4	AGGGTGGATGTCGAAATCCG	70	195.415	p53 CDE Pos		COQ4	AGGGTGGATGTCGAAATCCG	38	152.208	p53 CDE Pos		COQ4	AGGGTGGATGTCGAAATCCG	126	341.588	p53 CDE Pos		COQ4	AGGGTGGATGTCGAAATCCG	31	180.008	p53 CDE Pos		COQ4	AGGGTGGATGTCGAAATCCG	0	0	p53 CDE Pos		COQ4	AGGGTGGATGTCGAAATCCG	5	15.7047	p53 CDE Pos
COQ4	CCTCAGGGACCAGATGAGGA	16	82.0176	p53 CDE Pos		COQ4	CCTCAGGGACCAGATGAGGA	39	149.584	p53 CDE Pos		COQ4	CCTCAGGGACCAGATGAGGA	43	120.041	p53 CDE Pos		COQ4	CCTCAGGGACCAGATGAGGA	37	148.203	p53 CDE Pos		COQ4	CCTCAGGGACCAGATGAGGA	57	154.528	p53 CDE Pos		COQ4	CCTCAGGGACCAGATGAGGA	17	98.7138	p53 CDE Pos		COQ4	CCTCAGGGACCAGATGAGGA	87	318.287	p53 CDE Pos		COQ4	CCTCAGGGACCAGATGAGGA	23	72.2414	p53 CDE Pos
COQ4	CTTCAGGGTGCGGTGTCCTG	44	225.548	p53 CDE Pos		COQ4	CTTCAGGGTGCGGTGTCCTG	66	253.142	p53 CDE Pos		COQ4	CTTCAGGGTGCGGTGTCCTG	50	139.582	p53 CDE Pos		COQ4	CTTCAGGGTGCGGTGTCCTG	30	120.164	p53 CDE Pos		COQ4	CTTCAGGGTGCGGTGTCCTG	91	246.703	p53 CDE Pos		COQ4	CTTCAGGGTGCGGTGTCCTG	45	261.301	p53 CDE Pos		COQ4	CTTCAGGGTGCGGTGTCCTG	0	0	p53 CDE Pos		COQ4	CTTCAGGGTGCGGTGTCCTG	0	0	p53 CDE Pos
COQ4	GCAGTTCTAGGGGAGACCAC	55	281.936	p53 CDE Pos		COQ4	GCAGTTCTAGGGGAGACCAC	99	379.713	p53 CDE Pos		COQ4	GCAGTTCTAGGGGAGACCAC	35	97.7075	p53 CDE Pos		COQ4	GCAGTTCTAGGGGAGACCAC	28	112.153	p53 CDE Pos		COQ4	GCAGTTCTAGGGGAGACCAC	131	355.143	p53 CDE Pos		COQ4	GCAGTTCTAGGGGAGACCAC	39	226.461	p53 CDE Pos		COQ4	GCAGTTCTAGGGGAGACCAC	13	47.5602	p53 CDE Pos		COQ4	GCAGTTCTAGGGGAGACCAC	26	81.6642	p53 CDE Pos
COQ4	GCTGTTGGCCGCCGGCTCCG	66	338.323	p53 CDE Pos		COQ4	GCTGTTGGCCGCCGGCTCCG	60	230.129	p53 CDE Pos		COQ4	GCTGTTGGCCGCCGGCTCCG	4	11.1666	p53 CDE Pos		COQ4	GCTGTTGGCCGCCGGCTCCG	5	20.0274	p53 CDE Pos		COQ4	GCTGTTGGCCGCCGGCTCCG	98	265.68	p53 CDE Pos		COQ4	GCTGTTGGCCGCCGGCTCCG	48	278.721	p53 CDE Pos		COQ4	GCTGTTGGCCGCCGGCTCCG	5	18.2924	p53 CDE Pos		COQ4	GCTGTTGGCCGCCGGCTCCG	0	0	p53 CDE Pos
COQ4	GTTATAGAGCGCCATCGCCG	39	199.918	p53 CDE Pos		COQ4	GTTATAGAGCGCCATCGCCG	78	299.168	p53 CDE Pos		COQ4	GTTATAGAGCGCCATCGCCG	13	36.2914	p53 CDE Pos		COQ4	GTTATAGAGCGCCATCGCCG	2	8.01096	p53 CDE Pos		COQ4	GTTATAGAGCGCCATCGCCG	95	257.547	p53 CDE Pos		COQ4	GTTATAGAGCGCCATCGCCG	40	232.268	p53 CDE Pos		COQ4	GTTATAGAGCGCCATCGCCG	0	0	p53 CDE Pos		COQ4	GTTATAGAGCGCCATCGCCG	3	9.42279	p53 CDE Pos
COQ4	TGTGATTCAGCGGTACCGGG	19	97.3959	p53 CDE Pos		COQ4	TGTGATTCAGCGGTACCGGG	65	249.307	p53 CDE Pos		COQ4	TGTGATTCAGCGGTACCGGG	20	55.8329	p53 CDE Pos		COQ4	TGTGATTCAGCGGTACCGGG	15	60.0822	p53 CDE Pos		COQ4	TGTGATTCAGCGGTACCGGG	76	206.037	p53 CDE Pos		COQ4	TGTGATTCAGCGGTACCGGG	8	46.4536	p53 CDE Pos		COQ4	TGTGATTCAGCGGTACCGGG	3	10.9754	p53 CDE Pos		COQ4	TGTGATTCAGCGGTACCGGG	4	12.5637	p53 CDE Pos
COX11	ATGTGCATGCAAGTCTCCAG	31	158.909	p53 CDE Pos		COX11	ATGTGCATGCAAGTCTCCAG	17	65.2033	p53 CDE Pos		COX11	ATGTGCATGCAAGTCTCCAG	23	64.2078	p53 CDE Pos		COX11	ATGTGCATGCAAGTCTCCAG	60	240.329	p53 CDE Pos		COX11	ATGTGCATGCAAGTCTCCAG	61	165.372	p53 CDE Pos		COX11	ATGTGCATGCAAGTCTCCAG	11	63.8736	p53 CDE Pos		COX11	ATGTGCATGCAAGTCTCCAG	0	0	p53 CDE Pos		COX11	ATGTGCATGCAAGTCTCCAG	10	31.4093	p53 CDE Pos
COX11	CATGTTTTCAATCTTGTCTG	0	0	p53 CDE Pos		COX11	CATGTTTTCAATCTTGTCTG	0	0	p53 CDE Pos		COX11	CATGTTTTCAATCTTGTCTG	0	0	p53 CDE Pos		COX11	CATGTTTTCAATCTTGTCTG	0	0	p53 CDE Pos		COX11	CATGTTTTCAATCTTGTCTG	0	0	p53 CDE Pos		COX11	CATGTTTTCAATCTTGTCTG	0	0	p53 CDE Pos		COX11	CATGTTTTCAATCTTGTCTG	0	0	p53 CDE Pos		COX11	CATGTTTTCAATCTTGTCTG	0	0	p53 CDE Pos
COX11	CTCAGACAAGATTGAAAACA	68	348.575	p53 CDE Pos		COX11	CTCAGACAAGATTGAAAACA	150	575.323	p53 CDE Pos		COX11	CTCAGACAAGATTGAAAACA	103	287.539	p53 CDE Pos		COX11	CTCAGACAAGATTGAAAACA	83	332.455	p53 CDE Pos		COX11	CTCAGACAAGATTGAAAACA	171	463.584	p53 CDE Pos		COX11	CTCAGACAAGATTGAAAACA	79	458.729	p53 CDE Pos		COX11	CTCAGACAAGATTGAAAACA	158	578.039	p53 CDE Pos		COX11	CTCAGACAAGATTGAAAACA	332	1042.79	p53 CDE Pos
COX11	CTCCACTCTGGCCTAAGAAA	38	194.792	p53 CDE Pos		COX11	CTCCACTCTGGCCTAAGAAA	62	237.8	p53 CDE Pos		COX11	CTCCACTCTGGCCTAAGAAA	43	120.041	p53 CDE Pos		COX11	CTCCACTCTGGCCTAAGAAA	22	88.1205	p53 CDE Pos		COX11	CTCCACTCTGGCCTAAGAAA	90	243.992	p53 CDE Pos		COX11	CTCCACTCTGGCCTAAGAAA	41	238.074	p53 CDE Pos		COX11	CTCCACTCTGGCCTAAGAAA	7	25.6093	p53 CDE Pos		COX11	CTCCACTCTGGCCTAAGAAA	10	31.4093	p53 CDE Pos
COX11	CTTGGAGGATCAGCAGTTGC	80	410.088	p53 CDE Pos		COX11	CTTGGAGGATCAGCAGTTGC	117	448.752	p53 CDE Pos		COX11	CTTGGAGGATCAGCAGTTGC	154	429.913	p53 CDE Pos		COX11	CTTGGAGGATCAGCAGTTGC	85	340.466	p53 CDE Pos		COX11	CTTGGAGGATCAGCAGTTGC	140	379.543	p53 CDE Pos		COX11	CTTGGAGGATCAGCAGTTGC	67	389.049	p53 CDE Pos		COX11	CTTGGAGGATCAGCAGTTGC	36	131.705	p53 CDE Pos		COX11	CTTGGAGGATCAGCAGTTGC	54	169.61	p53 CDE Pos
COX11	GACAGCGGCCACGTAAGTGA	90	461.349	p53 CDE Pos		COX11	GACAGCGGCCACGTAAGTGA	68	260.813	p53 CDE Pos		COX11	GACAGCGGCCACGTAAGTGA	6	16.7499	p53 CDE Pos		COX11	GACAGCGGCCACGTAAGTGA	1	4.00548	p53 CDE Pos		COX11	GACAGCGGCCACGTAAGTGA	122	330.744	p53 CDE Pos		COX11	GACAGCGGCCACGTAAGTGA	73	423.889	p53 CDE Pos		COX11	GACAGCGGCCACGTAAGTGA	6	21.9508	p53 CDE Pos		COX11	GACAGCGGCCACGTAAGTGA	1	3.14093	p53 CDE Pos
COX11	GAGCTCTTAGGCCGCCGCGG	37	189.666	p53 CDE Pos		COX11	GAGCTCTTAGGCCGCCGCGG	13	49.8613	p53 CDE Pos		COX11	GAGCTCTTAGGCCGCCGCGG	32	89.3326	p53 CDE Pos		COX11	GAGCTCTTAGGCCGCCGCGG	7	28.0384	p53 CDE Pos		COX11	GAGCTCTTAGGCCGCCGCGG	43	116.574	p53 CDE Pos		COX11	GAGCTCTTAGGCCGCCGCGG	40	232.268	p53 CDE Pos		COX11	GAGCTCTTAGGCCGCCGCGG	0	0	p53 CDE Pos		COX11	GAGCTCTTAGGCCGCCGCGG	3	9.42279	p53 CDE Pos
COX11	GCTGAGGTCTAAAGTTCCAC	96	492.106	p53 CDE Pos		COX11	GCTGAGGTCTAAAGTTCCAC	110	421.904	p53 CDE Pos		COX11	GCTGAGGTCTAAAGTTCCAC	56	156.332	p53 CDE Pos		COX11	GCTGAGGTCTAAAGTTCCAC	57	228.312	p53 CDE Pos		COX11	GCTGAGGTCTAAAGTTCCAC	208	563.892	p53 CDE Pos		COX11	GCTGAGGTCTAAAGTTCCAC	82	476.149	p53 CDE Pos		COX11	GCTGAGGTCTAAAGTTCCAC	2	7.31695	p53 CDE Pos		COX11	GCTGAGGTCTAAAGTTCCAC	3	9.42279	p53 CDE Pos
COX11	TTAATGATTCGATCTTTAAC	15	76.8915	p53 CDE Pos		COX11	TTAATGATTCGATCTTTAAC	44	168.761	p53 CDE Pos		COX11	TTAATGATTCGATCTTTAAC	28	78.166	p53 CDE Pos		COX11	TTAATGATTCGATCTTTAAC	3	12.0164	p53 CDE Pos		COX11	TTAATGATTCGATCTTTAAC	40	108.441	p53 CDE Pos		COX11	TTAATGATTCGATCTTTAAC	10	58.067	p53 CDE Pos		COX11	TTAATGATTCGATCTTTAAC	4	14.6339	p53 CDE Pos		COX11	TTAATGATTCGATCTTTAAC	5	15.7047	p53 CDE Pos
COX11	TTCGAGCTCTTAGGCCGCCG	29	148.657	p53 CDE Pos		COX11	TTCGAGCTCTTAGGCCGCCG	57	218.623	p53 CDE Pos		COX11	TTCGAGCTCTTAGGCCGCCG	45	125.624	p53 CDE Pos		COX11	TTCGAGCTCTTAGGCCGCCG	39	156.214	p53 CDE Pos		COX11	TTCGAGCTCTTAGGCCGCCG	57	154.528	p53 CDE Pos		COX11	TTCGAGCTCTTAGGCCGCCG	19	110.327	p53 CDE Pos		COX11	TTCGAGCTCTTAGGCCGCCG	20	73.1695	p53 CDE Pos		COX11	TTCGAGCTCTTAGGCCGCCG	35	109.933	p53 CDE Pos
COX4I1	AAATTGCTCGCTTGCCAACT	31	158.909	p53 CDE Pos		COX4I1	AAATTGCTCGCTTGCCAACT	65	249.307	p53 CDE Pos		COX4I1	AAATTGCTCGCTTGCCAACT	227	633.703	p53 CDE Pos		COX4I1	AAATTGCTCGCTTGCCAACT	160	640.877	p53 CDE Pos		COX4I1	AAATTGCTCGCTTGCCAACT	79	214.17	p53 CDE Pos		COX4I1	AAATTGCTCGCTTGCCAACT	34	197.428	p53 CDE Pos		COX4I1	AAATTGCTCGCTTGCCAACT	4	14.6339	p53 CDE Pos		COX4I1	AAATTGCTCGCTTGCCAACT	7	21.9865	p53 CDE Pos
COX4I1	ATGAGCTCGTACACACACAG	0	0	p53 CDE Pos		COX4I1	ATGAGCTCGTACACACACAG	0	0	p53 CDE Pos		COX4I1	ATGAGCTCGTACACACACAG	0	0	p53 CDE Pos		COX4I1	ATGAGCTCGTACACACACAG	0	0	p53 CDE Pos		COX4I1	ATGAGCTCGTACACACACAG	0	0	p53 CDE Pos		COX4I1	ATGAGCTCGTACACACACAG	0	0	p53 CDE Pos		COX4I1	ATGAGCTCGTACACACACAG	0	0	p53 CDE Pos		COX4I1	ATGAGCTCGTACACACACAG	0	0	p53 CDE Pos
COX4I1	ATGAGCTCGTACACACACAG	0	0	p53 CDE Pos		COX4I1	ATGAGCTCGTACACACACAG	0	0	p53 CDE Pos		COX4I1	ATGAGCTCGTACACACACAG	0	0	p53 CDE Pos		COX4I1	ATGAGCTCGTACACACACAG	0	0	p53 CDE Pos		COX4I1	ATGAGCTCGTACACACACAG	0	0	p53 CDE Pos		COX4I1	ATGAGCTCGTACACACACAG	0	0	p53 CDE Pos		COX4I1	ATGAGCTCGTACACACACAG	0	0	p53 CDE Pos		COX4I1	ATGAGCTCGTACACACACAG	0	0	p53 CDE Pos
COX4I1	CGACTTTCTCATCCATGGAG	0	0	p53 CDE Pos		COX4I1	CGACTTTCTCATCCATGGAG	0	0	p53 CDE Pos		COX4I1	CGACTTTCTCATCCATGGAG	0	0	p53 CDE Pos		COX4I1	CGACTTTCTCATCCATGGAG	0	0	p53 CDE Pos		COX4I1	CGACTTTCTCATCCATGGAG	0	0	p53 CDE Pos		COX4I1	CGACTTTCTCATCCATGGAG	0	0	p53 CDE Pos		COX4I1	CGACTTTCTCATCCATGGAG	0	0	p53 CDE Pos		COX4I1	CGACTTTCTCATCCATGGAG	0	0	p53 CDE Pos
COX4I1	CGACTTTCTCATCCATGGAG	0	0	p53 CDE Pos		COX4I1	CGACTTTCTCATCCATGGAG	0	0	p53 CDE Pos		COX4I1	CGACTTTCTCATCCATGGAG	0	0	p53 CDE Pos		COX4I1	CGACTTTCTCATCCATGGAG	0	0	p53 CDE Pos		COX4I1	CGACTTTCTCATCCATGGAG	0	0	p53 CDE Pos		COX4I1	CGACTTTCTCATCCATGGAG	0	0	p53 CDE Pos		COX4I1	CGACTTTCTCATCCATGGAG	0	0	p53 CDE Pos		COX4I1	CGACTTTCTCATCCATGGAG	0	0	p53 CDE Pos
COX4I1	GCACCTGTCTGCCAGCCAGA	58	297.314	p53 CDE Pos		COX4I1	GCACCTGTCTGCCAGCCAGA	85	326.017	p53 CDE Pos		COX4I1	GCACCTGTCTGCCAGCCAGA	108	301.497	p53 CDE Pos		COX4I1	GCACCTGTCTGCCAGCCAGA	38	152.208	p53 CDE Pos		COX4I1	GCACCTGTCTGCCAGCCAGA	132	357.854	p53 CDE Pos		COX4I1	GCACCTGTCTGCCAGCCAGA	59	342.595	p53 CDE Pos		COX4I1	GCACCTGTCTGCCAGCCAGA	23	84.1449	p53 CDE Pos		COX4I1	GCACCTGTCTGCCAGCCAGA	56	175.892	p53 CDE Pos
COX4I1	GCCAACTAGGCTAAATACCC	18	92.2698	p53 CDE Pos		COX4I1	GCCAACTAGGCTAAATACCC	33	126.571	p53 CDE Pos		COX4I1	GCCAACTAGGCTAAATACCC	37	103.291	p53 CDE Pos		COX4I1	GCCAACTAGGCTAAATACCC	15	60.0822	p53 CDE Pos		COX4I1	GCCAACTAGGCTAAATACCC	36	97.5967	p53 CDE Pos		COX4I1	GCCAACTAGGCTAAATACCC	27	156.781	p53 CDE Pos		COX4I1	GCCAACTAGGCTAAATACCC	0	0	p53 CDE Pos		COX4I1	GCCAACTAGGCTAAATACCC	4	12.5637	p53 CDE Pos
COX4I1	GCGTGACCACCCCTTGCCGG	0	0	p53 CDE Pos		COX4I1	GCGTGACCACCCCTTGCCGG	0	0	p53 CDE Pos		COX4I1	GCGTGACCACCCCTTGCCGG	0	0	p53 CDE Pos		COX4I1	GCGTGACCACCCCTTGCCGG	0	0	p53 CDE Pos		COX4I1	GCGTGACCACCCCTTGCCGG	0	0	p53 CDE Pos		COX4I1	GCGTGACCACCCCTTGCCGG	0	0	p53 CDE Pos		COX4I1	GCGTGACCACCCCTTGCCGG	0	0	p53 CDE Pos		COX4I1	GCGTGACCACCCCTTGCCGG	0	0	p53 CDE Pos
COX4I1	GCGTGACCACCCCTTGCCGG	0	0	p53 CDE Pos		COX4I1	GCGTGACCACCCCTTGCCGG	0	0	p53 CDE Pos		COX4I1	GCGTGACCACCCCTTGCCGG	0	0	p53 CDE Pos		COX4I1	GCGTGACCACCCCTTGCCGG	0	0	p53 CDE Pos		COX4I1	GCGTGACCACCCCTTGCCGG	0	0	p53 CDE Pos		COX4I1	GCGTGACCACCCCTTGCCGG	0	0	p53 CDE Pos		COX4I1	GCGTGACCACCCCTTGCCGG	0	0	p53 CDE Pos		COX4I1	GCGTGACCACCCCTTGCCGG	0	0	p53 CDE Pos
COX4I1	GGGCCACCTCCGGCAAGGGG	15	76.8915	p53 CDE Pos		COX4I1	GGGCCACCTCCGGCAAGGGG	15	57.5323	p53 CDE Pos		COX4I1	GGGCCACCTCCGGCAAGGGG	98	273.581	p53 CDE Pos		COX4I1	GGGCCACCTCCGGCAAGGGG	32	128.175	p53 CDE Pos		COX4I1	GGGCCACCTCCGGCAAGGGG	32	86.7526	p53 CDE Pos		COX4I1	GGGCCACCTCCGGCAAGGGG	27	156.781	p53 CDE Pos		COX4I1	GGGCCACCTCCGGCAAGGGG	0	0	p53 CDE Pos		COX4I1	GGGCCACCTCCGGCAAGGGG	0	0	p53 CDE Pos
CR1	GCCGTCCTGAGTACTACGGG	46	235.801	p53 CDE Pos		CR1	GCCGTCCTGAGTACTACGGG	32	122.736	p53 CDE Pos		CR1	GCCGTCCTGAGTACTACGGG	56	156.332	p53 CDE Pos		CR1	GCCGTCCTGAGTACTACGGG	46	184.252	p53 CDE Pos		CR1	GCCGTCCTGAGTACTACGGG	36	97.5967	p53 CDE Pos		CR1	GCCGTCCTGAGTACTACGGG	35	203.234	p53 CDE Pos		CR1	GCCGTCCTGAGTACTACGGG	4	14.6339	p53 CDE Pos		CR1	GCCGTCCTGAGTACTACGGG	3	9.42279	p53 CDE Pos
CR1	GCCTCCCGTAGTACTCAGGA	55	281.936	p53 CDE Pos		CR1	GCCTCCCGTAGTACTCAGGA	63	241.636	p53 CDE Pos		CR1	GCCTCCCGTAGTACTCAGGA	43	120.041	p53 CDE Pos		CR1	GCCTCCCGTAGTACTCAGGA	13	52.0712	p53 CDE Pos		CR1	GCCTCCCGTAGTACTCAGGA	90	243.992	p53 CDE Pos		CR1	GCCTCCCGTAGTACTCAGGA	30	174.201	p53 CDE Pos		CR1	GCCTCCCGTAGTACTCAGGA	50	182.924	p53 CDE Pos		CR1	GCCTCCCGTAGTACTCAGGA	44	138.201	p53 CDE Pos
CR1	GCCCGGCTACGACCTCAGAG	97	497.232	p53 CDE Pos		CR1	GCCCGGCTACGACCTCAGAG	86	329.852	p53 CDE Pos		CR1	GCCCGGCTACGACCTCAGAG	85	237.29	p53 CDE Pos		CR1	GCCCGGCTACGACCTCAGAG	107	428.586	p53 CDE Pos		CR1	GCCCGGCTACGACCTCAGAG	134	363.277	p53 CDE Pos		CR1	GCCCGGCTACGACCTCAGAG	51	296.141	p53 CDE Pos		CR1	GCCCGGCTACGACCTCAGAG	60	219.508	p53 CDE Pos		CR1	GCCCGGCTACGACCTCAGAG	51	160.187	p53 CDE Pos
CR1	ATCACCTGAGATGATGCATG	54	276.81	p53 CDE Pos		CR1	ATCACCTGAGATGATGCATG	54	207.116	p53 CDE Pos		CR1	ATCACCTGAGATGATGCATG	81	226.123	p53 CDE Pos		CR1	ATCACCTGAGATGATGCATG	65	260.356	p53 CDE Pos		CR1	ATCACCTGAGATGATGCATG	89	241.281	p53 CDE Pos		CR1	ATCACCTGAGATGATGCATG	42	243.881	p53 CDE Pos		CR1	ATCACCTGAGATGATGCATG	33	120.73	p53 CDE Pos		CR1	ATCACCTGAGATGATGCATG	3	9.42279	p53 CDE Pos
CR1	GATTTACTGGAAATAGCACA	44	225.548	p53 CDE Pos		CR1	GATTTACTGGAAATAGCACA	48	184.103	p53 CDE Pos		CR1	GATTTACTGGAAATAGCACA	57	159.124	p53 CDE Pos		CR1	GATTTACTGGAAATAGCACA	6	24.0329	p53 CDE Pos		CR1	GATTTACTGGAAATAGCACA	38	103.019	p53 CDE Pos		CR1	GATTTACTGGAAATAGCACA	19	110.327	p53 CDE Pos		CR1	GATTTACTGGAAATAGCACA	0	0	p53 CDE Pos		CR1	GATTTACTGGAAATAGCACA	6	18.8456	p53 CDE Pos
CR1	TAACCCAGAATTCCACAGCG	40	205.044	p53 CDE Pos		CR1	TAACCCAGAATTCCACAGCG	98	375.878	p53 CDE Pos		CR1	TAACCCAGAATTCCACAGCG	68	189.832	p53 CDE Pos		CR1	TAACCCAGAATTCCACAGCG	39	156.214	p53 CDE Pos		CR1	TAACCCAGAATTCCACAGCG	111	300.923	p53 CDE Pos		CR1	TAACCCAGAATTCCACAGCG	52	301.948	p53 CDE Pos		CR1	TAACCCAGAATTCCACAGCG	1	3.65847	p53 CDE Pos		CR1	TAACCCAGAATTCCACAGCG	10	31.4093	p53 CDE Pos
CR1	GCATAGACGCAGCCCCTCTG	21	107.648	p53 CDE Pos		CR1	GCATAGACGCAGCCCCTCTG	35	134.242	p53 CDE Pos		CR1	GCATAGACGCAGCCCCTCTG	48	133.999	p53 CDE Pos		CR1	GCATAGACGCAGCCCCTCTG	31	124.17	p53 CDE Pos		CR1	GCATAGACGCAGCCCCTCTG	53	143.684	p53 CDE Pos		CR1	GCATAGACGCAGCCCCTCTG	11	63.8736	p53 CDE Pos		CR1	GCATAGACGCAGCCCCTCTG	0	0	p53 CDE Pos		CR1	GCATAGACGCAGCCCCTCTG	6	18.8456	p53 CDE Pos
CR1	ACCAGCAATGACGATCAAGT	53	271.683	p53 CDE Pos		CR1	ACCAGCAATGACGATCAAGT	64	245.471	p53 CDE Pos		CR1	ACCAGCAATGACGATCAAGT	122	340.58	p53 CDE Pos		CR1	ACCAGCAATGACGATCAAGT	31	124.17	p53 CDE Pos		CR1	ACCAGCAATGACGATCAAGT	51	138.262	p53 CDE Pos		CR1	ACCAGCAATGACGATCAAGT	19	110.327	p53 CDE Pos		CR1	ACCAGCAATGACGATCAAGT	2	7.31695	p53 CDE Pos		CR1	ACCAGCAATGACGATCAAGT	3	9.42279	p53 CDE Pos
CR1	CTCCGCTTCCAGGATTGCAG	38	194.792	p53 CDE Pos		CR1	CTCCGCTTCCAGGATTGCAG	50	191.774	p53 CDE Pos		CR1	CTCCGCTTCCAGGATTGCAG	65	181.457	p53 CDE Pos		CR1	CTCCGCTTCCAGGATTGCAG	13	52.0712	p53 CDE Pos		CR1	CTCCGCTTCCAGGATTGCAG	96	260.258	p53 CDE Pos		CR1	CTCCGCTTCCAGGATTGCAG	24	139.361	p53 CDE Pos		CR1	CTCCGCTTCCAGGATTGCAG	5	18.2924	p53 CDE Pos		CR1	CTCCGCTTCCAGGATTGCAG	22	69.1005	p53 CDE Pos
CR1	CACCAGCAATGACGATCAAG	11	56.3871	p53 CDE Pos		CR1	CACCAGCAATGACGATCAAG	15	57.5323	p53 CDE Pos		CR1	CACCAGCAATGACGATCAAG	8	22.3331	p53 CDE Pos		CR1	CACCAGCAATGACGATCAAG	0	0	p53 CDE Pos		CR1	CACCAGCAATGACGATCAAG	10	27.1102	p53 CDE Pos		CR1	CACCAGCAATGACGATCAAG	12	69.6803	p53 CDE Pos		CR1	CACCAGCAATGACGATCAAG	0	0	p53 CDE Pos		CR1	CACCAGCAATGACGATCAAG	0	0	p53 CDE Pos
CRIPT	AAAAGTTCTGTGCACCAACC	59	302.44	p53 CDE Neutral		CRIPT	AAAAGTTCTGTGCACCAACC	94	360.536	p53 CDE Neutral		CRIPT	AAAAGTTCTGTGCACCAACC	110	307.081	p53 CDE Neutral		CRIPT	AAAAGTTCTGTGCACCAACC	135	540.74	p53 CDE Neutral		CRIPT	AAAAGTTCTGTGCACCAACC	104	281.946	p53 CDE Neutral		CRIPT	AAAAGTTCTGTGCACCAACC	64	371.628	p53 CDE Neutral		CRIPT	AAAAGTTCTGTGCACCAACC	21	76.828	p53 CDE Neutral		CRIPT	AAAAGTTCTGTGCACCAACC	95	298.388	p53 CDE Neutral
CRIPT	ACTCCAGATACATGGAAAGA	78	399.836	p53 CDE Neutral		CRIPT	ACTCCAGATACATGGAAAGA	110	421.904	p53 CDE Neutral		CRIPT	ACTCCAGATACATGGAAAGA	74	206.582	p53 CDE Neutral		CRIPT	ACTCCAGATACATGGAAAGA	66	264.362	p53 CDE Neutral		CRIPT	ACTCCAGATACATGGAAAGA	84	227.726	p53 CDE Neutral		CRIPT	ACTCCAGATACATGGAAAGA	54	313.562	p53 CDE Neutral		CRIPT	ACTCCAGATACATGGAAAGA	6	21.9508	p53 CDE Neutral		CRIPT	ACTCCAGATACATGGAAAGA	6	18.8456	p53 CDE Neutral
CRIPT	ACTTTTACAAATTCTACAAG	0	0	p53 CDE Neutral		CRIPT	ACTTTTACAAATTCTACAAG	0	0	p53 CDE Neutral		CRIPT	ACTTTTACAAATTCTACAAG	0	0	p53 CDE Neutral		CRIPT	ACTTTTACAAATTCTACAAG	0	0	p53 CDE Neutral		CRIPT	ACTTTTACAAATTCTACAAG	0	0	p53 CDE Neutral		CRIPT	ACTTTTACAAATTCTACAAG	0	0	p53 CDE Neutral		CRIPT	ACTTTTACAAATTCTACAAG	0	0	p53 CDE Neutral		CRIPT	ACTTTTACAAATTCTACAAG	0	0	p53 CDE Neutral
CRIPT	ATACATGGAAAGATGGTGCT	0	0	p53 CDE Neutral		CRIPT	ATACATGGAAAGATGGTGCT	0	0	p53 CDE Neutral		CRIPT	ATACATGGAAAGATGGTGCT	0	0	p53 CDE Neutral		CRIPT	ATACATGGAAAGATGGTGCT	0	0	p53 CDE Neutral		CRIPT	ATACATGGAAAGATGGTGCT	0	0	p53 CDE Neutral		CRIPT	ATACATGGAAAGATGGTGCT	0	0	p53 CDE Neutral		CRIPT	ATACATGGAAAGATGGTGCT	0	0	p53 CDE Neutral		CRIPT	ATACATGGAAAGATGGTGCT	0	0	p53 CDE Neutral
CRIPT	ATACATGGAAAGATGGTGCT	0	0	p53 CDE Neutral		CRIPT	ATACATGGAAAGATGGTGCT	0	0	p53 CDE Neutral		CRIPT	ATACATGGAAAGATGGTGCT	0	0	p53 CDE Neutral		CRIPT	ATACATGGAAAGATGGTGCT	0	0	p53 CDE Neutral		CRIPT	ATACATGGAAAGATGGTGCT	0	0	p53 CDE Neutral		CRIPT	ATACATGGAAAGATGGTGCT	0	0	p53 CDE Neutral		CRIPT	ATACATGGAAAGATGGTGCT	0	0	p53 CDE Neutral		CRIPT	ATACATGGAAAGATGGTGCT	0	0	p53 CDE Neutral
CRIPT	CTAACAGGTGAAAAGAAACT	65	333.197	p53 CDE Neutral		CRIPT	CTAACAGGTGAAAAGAAACT	68	260.813	p53 CDE Neutral		CRIPT	CTAACAGGTGAAAAGAAACT	115	321.039	p53 CDE Neutral		CRIPT	CTAACAGGTGAAAAGAAACT	81	324.444	p53 CDE Neutral		CRIPT	CTAACAGGTGAAAAGAAACT	119	322.611	p53 CDE Neutral		CRIPT	CTAACAGGTGAAAAGAAACT	63	365.822	p53 CDE Neutral		CRIPT	CTAACAGGTGAAAAGAAACT	240	878.034	p53 CDE Neutral		CRIPT	CTAACAGGTGAAAAGAAACT	202	634.468	p53 CDE Neutral
CRIPT	CTGTTATCACTCCAGATACA	52	266.557	p53 CDE Neutral		CRIPT	CTGTTATCACTCCAGATACA	40	153.42	p53 CDE Neutral		CRIPT	CTGTTATCACTCCAGATACA	73	203.79	p53 CDE Neutral		CRIPT	CTGTTATCACTCCAGATACA	60	240.329	p53 CDE Neutral		CRIPT	CTGTTATCACTCCAGATACA	72	195.193	p53 CDE Neutral		CRIPT	CTGTTATCACTCCAGATACA	41	238.074	p53 CDE Neutral		CRIPT	CTGTTATCACTCCAGATACA	38	139.022	p53 CDE Neutral		CRIPT	CTGTTATCACTCCAGATACA	24	75.3823	p53 CDE Neutral
CRIPT	GATGGTGCTAGGAATACCAC	36	184.54	p53 CDE Neutral		CRIPT	GATGGTGCTAGGAATACCAC	46	176.432	p53 CDE Neutral		CRIPT	GATGGTGCTAGGAATACCAC	163	455.038	p53 CDE Neutral		CRIPT	GATGGTGCTAGGAATACCAC	83	332.455	p53 CDE Neutral		CRIPT	GATGGTGCTAGGAATACCAC	79	214.17	p53 CDE Neutral		CRIPT	GATGGTGCTAGGAATACCAC	41	238.074	p53 CDE Neutral		CRIPT	GATGGTGCTAGGAATACCAC	13	47.5602	p53 CDE Neutral		CRIPT	GATGGTGCTAGGAATACCAC	3	9.42279	p53 CDE Neutral
CRIPT	GGCAGTAATGAGAACCTGGT	68	348.575	p53 CDE Neutral		CRIPT	GGCAGTAATGAGAACCTGGT	75	287.662	p53 CDE Neutral		CRIPT	GGCAGTAATGAGAACCTGGT	53	147.957	p53 CDE Neutral		CRIPT	GGCAGTAATGAGAACCTGGT	59	236.323	p53 CDE Neutral		CRIPT	GGCAGTAATGAGAACCTGGT	91	246.703	p53 CDE Neutral		CRIPT	GGCAGTAATGAGAACCTGGT	48	278.721	p53 CDE Neutral		CRIPT	GGCAGTAATGAGAACCTGGT	58	212.191	p53 CDE Neutral		CRIPT	GGCAGTAATGAGAACCTGGT	38	119.355	p53 CDE Neutral
CRIPT	TATTCTGATACAGAAAGTGG	41	210.17	p53 CDE Neutral		CRIPT	TATTCTGATACAGAAAGTGG	100	383.549	p53 CDE Neutral		CRIPT	TATTCTGATACAGAAAGTGG	99	276.373	p53 CDE Neutral		CRIPT	TATTCTGATACAGAAAGTGG	48	192.263	p53 CDE Neutral		CRIPT	TATTCTGATACAGAAAGTGG	103	279.235	p53 CDE Neutral		CRIPT	TATTCTGATACAGAAAGTGG	20	116.134	p53 CDE Neutral		CRIPT	TATTCTGATACAGAAAGTGG	32	117.071	p53 CDE Neutral		CRIPT	TATTCTGATACAGAAAGTGG	35	109.933	p53 CDE Neutral
CRISPLD1	ACGCCAAGATCCCATCCACA	65	333.197	p53 CDE Neg		CRISPLD1	ACGCCAAGATCCCATCCACA	80	306.839	p53 CDE Neg		CRISPLD1	ACGCCAAGATCCCATCCACA	146	407.58	p53 CDE Neg		CRISPLD1	ACGCCAAGATCCCATCCACA	73	292.4	p53 CDE Neg		CRISPLD1	ACGCCAAGATCCCATCCACA	124	336.166	p53 CDE Neg		CRISPLD1	ACGCCAAGATCCCATCCACA	53	307.755	p53 CDE Neg		CRISPLD1	ACGCCAAGATCCCATCCACA	308	1126.81	p53 CDE Neg		CRISPLD1	ACGCCAAGATCCCATCCACA	382	1199.84	p53 CDE Neg
CRISPLD1	AGAGTGTTCAAGGGTCACGG	0	0	p53 CDE Neg		CRISPLD1	AGAGTGTTCAAGGGTCACGG	0	0	p53 CDE Neg		CRISPLD1	AGAGTGTTCAAGGGTCACGG	0	0	p53 CDE Neg		CRISPLD1	AGAGTGTTCAAGGGTCACGG	0	0	p53 CDE Neg		CRISPLD1	AGAGTGTTCAAGGGTCACGG	0	0	p53 CDE Neg		CRISPLD1	AGAGTGTTCAAGGGTCACGG	0	0	p53 CDE Neg		CRISPLD1	AGAGTGTTCAAGGGTCACGG	0	0	p53 CDE Neg		CRISPLD1	AGAGTGTTCAAGGGTCACGG	0	0	p53 CDE Neg
CRISPLD1	AGCAGCAGTACATGCTGGAG	17	87.1437	p53 CDE Neg		CRISPLD1	AGCAGCAGTACATGCTGGAG	54	207.116	p53 CDE Neg		CRISPLD1	AGCAGCAGTACATGCTGGAG	39	108.874	p53 CDE Neg		CRISPLD1	AGCAGCAGTACATGCTGGAG	32	128.175	p53 CDE Neg		CRISPLD1	AGCAGCAGTACATGCTGGAG	32	86.7526	p53 CDE Neg		CRISPLD1	AGCAGCAGTACATGCTGGAG	19	110.327	p53 CDE Neg		CRISPLD1	AGCAGCAGTACATGCTGGAG	0	0	p53 CDE Neg		CRISPLD1	AGCAGCAGTACATGCTGGAG	6	18.8456	p53 CDE Neg
CRISPLD1	CCAATTACACGAGCATAATG	21	107.648	p53 CDE Neg		CRISPLD1	CCAATTACACGAGCATAATG	28	107.394	p53 CDE Neg		CRISPLD1	CCAATTACACGAGCATAATG	30	83.7493	p53 CDE Neg		CRISPLD1	CCAATTACACGAGCATAATG	35	140.192	p53 CDE Neg		CRISPLD1	CCAATTACACGAGCATAATG	68	184.349	p53 CDE Neg		CRISPLD1	CCAATTACACGAGCATAATG	40	232.268	p53 CDE Neg		CRISPLD1	CCAATTACACGAGCATAATG	0	0	p53 CDE Neg		CRISPLD1	CCAATTACACGAGCATAATG	5	15.7047	p53 CDE Neg
CRISPLD1	GGAGTGGTTCGAAATCACGG	18	92.2698	p53 CDE Neg		CRISPLD1	GGAGTGGTTCGAAATCACGG	35	134.242	p53 CDE Neg		CRISPLD1	GGAGTGGTTCGAAATCACGG	29	80.9576	p53 CDE Neg		CRISPLD1	GGAGTGGTTCGAAATCACGG	12	48.0658	p53 CDE Neg		CRISPLD1	GGAGTGGTTCGAAATCACGG	14	37.9543	p53 CDE Neg		CRISPLD1	GGAGTGGTTCGAAATCACGG	14	81.2937	p53 CDE Neg		CRISPLD1	GGAGTGGTTCGAAATCACGG	11	40.2432	p53 CDE Neg		CRISPLD1	GGAGTGGTTCGAAATCACGG	2	6.28186	p53 CDE Neg
CRISPLD1	GGGCTACCTGACCCACAGAA	29	148.657	p53 CDE Neg		CRISPLD1	GGGCTACCTGACCCACAGAA	28	107.394	p53 CDE Neg		CRISPLD1	GGGCTACCTGACCCACAGAA	33	92.1242	p53 CDE Neg		CRISPLD1	GGGCTACCTGACCCACAGAA	14	56.0767	p53 CDE Neg		CRISPLD1	GGGCTACCTGACCCACAGAA	54	146.395	p53 CDE Neg		CRISPLD1	GGGCTACCTGACCCACAGAA	33	191.621	p53 CDE Neg		CRISPLD1	GGGCTACCTGACCCACAGAA	7	25.6093	p53 CDE Neg		CRISPLD1	GGGCTACCTGACCCACAGAA	1	3.14093	p53 CDE Neg
CRISPLD1	TTACTATCCAAACAGCCAGC	0	0	p53 CDE Neg		CRISPLD1	TTACTATCCAAACAGCCAGC	0	0	p53 CDE Neg		CRISPLD1	TTACTATCCAAACAGCCAGC	0	0	p53 CDE Neg		CRISPLD1	TTACTATCCAAACAGCCAGC	0	0	p53 CDE Neg		CRISPLD1	TTACTATCCAAACAGCCAGC	0	0	p53 CDE Neg		CRISPLD1	TTACTATCCAAACAGCCAGC	0	0	p53 CDE Neg		CRISPLD1	TTACTATCCAAACAGCCAGC	0	0	p53 CDE Neg		CRISPLD1	TTACTATCCAAACAGCCAGC	0	0	p53 CDE Neg
CRISPLD1	TTATGTTGATGTAATGCCTG	37	189.666	p53 CDE Neg		CRISPLD1	TTATGTTGATGTAATGCCTG	55	210.952	p53 CDE Neg		CRISPLD1	TTATGTTGATGTAATGCCTG	22	61.4161	p53 CDE Neg		CRISPLD1	TTATGTTGATGTAATGCCTG	47	188.258	p53 CDE Neg		CRISPLD1	TTATGTTGATGTAATGCCTG	53	143.684	p53 CDE Neg		CRISPLD1	TTATGTTGATGTAATGCCTG	45	261.301	p53 CDE Neg		CRISPLD1	TTATGTTGATGTAATGCCTG	3	10.9754	p53 CDE Neg		CRISPLD1	TTATGTTGATGTAATGCCTG	9	28.2684	p53 CDE Neg
CRISPLD1	TTTGCTTGCATACAGTTACG	29	148.657	p53 CDE Neg		CRISPLD1	TTTGCTTGCATACAGTTACG	35	134.242	p53 CDE Neg		CRISPLD1	TTTGCTTGCATACAGTTACG	58	161.915	p53 CDE Neg		CRISPLD1	TTTGCTTGCATACAGTTACG	48	192.263	p53 CDE Neg		CRISPLD1	TTTGCTTGCATACAGTTACG	68	184.349	p53 CDE Neg		CRISPLD1	TTTGCTTGCATACAGTTACG	19	110.327	p53 CDE Neg		CRISPLD1	TTTGCTTGCATACAGTTACG	3	10.9754	p53 CDE Neg		CRISPLD1	TTTGCTTGCATACAGTTACG	9	28.2684	p53 CDE Neg
CSH2	AAAAAGCCTGGATAACGGAA	0	0	p53 CDE Pos		CSH2	AAAAAGCCTGGATAACGGAA	0	0	p53 CDE Pos		CSH2	AAAAAGCCTGGATAACGGAA	0	0	p53 CDE Pos		CSH2	AAAAAGCCTGGATAACGGAA	0	0	p53 CDE Pos		CSH2	AAAAAGCCTGGATAACGGAA	0	0	p53 CDE Pos		CSH2	AAAAAGCCTGGATAACGGAA	0	0	p53 CDE Pos		CSH2	AAAAAGCCTGGATAACGGAA	0	0	p53 CDE Pos		CSH2	AAAAAGCCTGGATAACGGAA	0	0	p53 CDE Pos
CSH2	AAAAAGCCTGGATAACGGAA	0	0	p53 CDE Pos		CSH2	AAAAAGCCTGGATAACGGAA	0	0	p53 CDE Pos		CSH2	AAAAAGCCTGGATAACGGAA	0	0	p53 CDE Pos		CSH2	AAAAAGCCTGGATAACGGAA	0	0	p53 CDE Pos		CSH2	AAAAAGCCTGGATAACGGAA	0	0	p53 CDE Pos		CSH2	AAAAAGCCTGGATAACGGAA	0	0	p53 CDE Pos		CSH2	AAAAAGCCTGGATAACGGAA	0	0	p53 CDE Pos		CSH2	AAAAAGCCTGGATAACGGAA	0	0	p53 CDE Pos
CSH2	AGAGTCTGAGAAGCAGAAGG	16	82.0176	p53 CDE Pos		CSH2	AGAGTCTGAGAAGCAGAAGG	27	103.558	p53 CDE Pos		CSH2	AGAGTCTGAGAAGCAGAAGG	71	198.207	p53 CDE Pos		CSH2	AGAGTCTGAGAAGCAGAAGG	21	84.1151	p53 CDE Pos		CSH2	AGAGTCTGAGAAGCAGAAGG	16	43.3763	p53 CDE Pos		CSH2	AGAGTCTGAGAAGCAGAAGG	16	92.9071	p53 CDE Pos		CSH2	AGAGTCTGAGAAGCAGAAGG	19	69.511	p53 CDE Pos		CSH2	AGAGTCTGAGAAGCAGAAGG	0	0	p53 CDE Pos
CSH2	CACAGCTACCCTCTACAGAG	18	92.2698	p53 CDE Pos		CSH2	CACAGCTACCCTCTACAGAG	28	107.394	p53 CDE Pos		CSH2	CACAGCTACCCTCTACAGAG	76	212.165	p53 CDE Pos		CSH2	CACAGCTACCCTCTACAGAG	24	96.1315	p53 CDE Pos		CSH2	CACAGCTACCCTCTACAGAG	75	203.326	p53 CDE Pos		CSH2	CACAGCTACCCTCTACAGAG	18	104.521	p53 CDE Pos		CSH2	CACAGCTACCCTCTACAGAG	71	259.752	p53 CDE Pos		CSH2	CACAGCTACCCTCTACAGAG	71	223.006	p53 CDE Pos
CSH2	CGCTCTGTAGAGGGTAGCTG	37	189.666	p53 CDE Pos		CSH2	CGCTCTGTAGAGGGTAGCTG	12	46.0259	p53 CDE Pos		CSH2	CGCTCTGTAGAGGGTAGCTG	23	64.2078	p53 CDE Pos		CSH2	CGCTCTGTAGAGGGTAGCTG	15	60.0822	p53 CDE Pos		CSH2	CGCTCTGTAGAGGGTAGCTG	73	197.904	p53 CDE Pos		CSH2	CGCTCTGTAGAGGGTAGCTG	38	220.654	p53 CDE Pos		CSH2	CGCTCTGTAGAGGGTAGCTG	60	219.508	p53 CDE Pos		CSH2	CGCTCTGTAGAGGGTAGCTG	12	37.6912	p53 CDE Pos
CSH2	GCACCAGCCTCTTGAAGCCA	29	148.657	p53 CDE Pos		CSH2	GCACCAGCCTCTTGAAGCCA	32	122.736	p53 CDE Pos		CSH2	GCACCAGCCTCTTGAAGCCA	66	184.248	p53 CDE Pos		CSH2	GCACCAGCCTCTTGAAGCCA	28	112.153	p53 CDE Pos		CSH2	GCACCAGCCTCTTGAAGCCA	93	252.125	p53 CDE Pos		CSH2	GCACCAGCCTCTTGAAGCCA	26	150.974	p53 CDE Pos		CSH2	GCACCAGCCTCTTGAAGCCA	33	120.73	p53 CDE Pos		CSH2	GCACCAGCCTCTTGAAGCCA	18	56.5367	p53 CDE Pos
CSH2	GCCTGGATAACGGAACGGTT	0	0	p53 CDE Pos		CSH2	GCCTGGATAACGGAACGGTT	0	0	p53 CDE Pos		CSH2	GCCTGGATAACGGAACGGTT	0	0	p53 CDE Pos		CSH2	GCCTGGATAACGGAACGGTT	0	0	p53 CDE Pos		CSH2	GCCTGGATAACGGAACGGTT	0	0	p53 CDE Pos		CSH2	GCCTGGATAACGGAACGGTT	0	0	p53 CDE Pos		CSH2	GCCTGGATAACGGAACGGTT	0	0	p53 CDE Pos		CSH2	GCCTGGATAACGGAACGGTT	0	0	p53 CDE Pos
CSH2	GCCTGGATAACGGAACGGTT	0	0	p53 CDE Pos		CSH2	GCCTGGATAACGGAACGGTT	0	0	p53 CDE Pos		CSH2	GCCTGGATAACGGAACGGTT	0	0	p53 CDE Pos		CSH2	GCCTGGATAACGGAACGGTT	0	0	p53 CDE Pos		CSH2	GCCTGGATAACGGAACGGTT	0	0	p53 CDE Pos		CSH2	GCCTGGATAACGGAACGGTT	0	0	p53 CDE Pos		CSH2	GCCTGGATAACGGAACGGTT	0	0	p53 CDE Pos		CSH2	GCCTGGATAACGGAACGGTT	0	0	p53 CDE Pos
CSH2	GGAAGAAACCTATATCCCAA	42	215.296	p53 CDE Pos		CSH2	GGAAGAAACCTATATCCCAA	49	187.939	p53 CDE Pos		CSH2	GGAAGAAACCTATATCCCAA	53	147.957	p53 CDE Pos		CSH2	GGAAGAAACCTATATCCCAA	66	264.362	p53 CDE Pos		CSH2	GGAAGAAACCTATATCCCAA	70	189.771	p53 CDE Pos		CSH2	GGAAGAAACCTATATCCCAA	35	203.234	p53 CDE Pos		CSH2	GGAAGAAACCTATATCCCAA	5	18.2924	p53 CDE Pos		CSH2	GGAAGAAACCTATATCCCAA	155	486.844	p53 CDE Pos
CSH2	GGATAACGGAACGGTTTGGA	0	0	p53 CDE Pos		CSH2	GGATAACGGAACGGTTTGGA	0	0	p53 CDE Pos		CSH2	GGATAACGGAACGGTTTGGA	0	0	p53 CDE Pos		CSH2	GGATAACGGAACGGTTTGGA	0	0	p53 CDE Pos		CSH2	GGATAACGGAACGGTTTGGA	0	0	p53 CDE Pos		CSH2	GGATAACGGAACGGTTTGGA	0	0	p53 CDE Pos		CSH2	GGATAACGGAACGGTTTGGA	0	0	p53 CDE Pos		CSH2	GGATAACGGAACGGTTTGGA	0	0	p53 CDE Pos
CSH2	GGATAACGGAACGGTTTGGA	0	0	p53 CDE Pos		CSH2	GGATAACGGAACGGTTTGGA	0	0	p53 CDE Pos		CSH2	GGATAACGGAACGGTTTGGA	0	0	p53 CDE Pos		CSH2	GGATAACGGAACGGTTTGGA	0	0	p53 CDE Pos		CSH2	GGATAACGGAACGGTTTGGA	0	0	p53 CDE Pos		CSH2	GGATAACGGAACGGTTTGGA	0	0	p53 CDE Pos		CSH2	GGATAACGGAACGGTTTGGA	0	0	p53 CDE Pos		CSH2	GGATAACGGAACGGTTTGGA	0	0	p53 CDE Pos
CSH2	GGTGCAGTGCCGCTCTGTAG	16	82.0176	p53 CDE Pos		CSH2	GGTGCAGTGCCGCTCTGTAG	32	122.736	p53 CDE Pos		CSH2	GGTGCAGTGCCGCTCTGTAG	15	41.8746	p53 CDE Pos		CSH2	GGTGCAGTGCCGCTCTGTAG	36	144.197	p53 CDE Pos		CSH2	GGTGCAGTGCCGCTCTGTAG	31	84.0416	p53 CDE Pos		CSH2	GGTGCAGTGCCGCTCTGTAG	22	127.747	p53 CDE Pos		CSH2	GGTGCAGTGCCGCTCTGTAG	20	73.1695	p53 CDE Pos		CSH2	GGTGCAGTGCCGCTCTGTAG	7	21.9865	p53 CDE Pos
CSH2	TGCCTGCCCTGGCTTCAAGA	33	169.161	p53 CDE Pos		CSH2	TGCCTGCCCTGGCTTCAAGA	21	80.5453	p53 CDE Pos		CSH2	TGCCTGCCCTGGCTTCAAGA	32	89.3326	p53 CDE Pos		CSH2	TGCCTGCCCTGGCTTCAAGA	15	60.0822	p53 CDE Pos		CSH2	TGCCTGCCCTGGCTTCAAGA	60	162.661	p53 CDE Pos		CSH2	TGCCTGCCCTGGCTTCAAGA	31	180.008	p53 CDE Pos		CSH2	TGCCTGCCCTGGCTTCAAGA	0	0	p53 CDE Pos		CSH2	TGCCTGCCCTGGCTTCAAGA	0	0	p53 CDE Pos
CSH2	TGCGTTTCCTCCATGTTGGA	34	174.287	p53 CDE Pos		CSH2	TGCGTTTCCTCCATGTTGGA	25	95.8872	p53 CDE Pos		CSH2	TGCGTTTCCTCCATGTTGGA	111	309.872	p53 CDE Pos		CSH2	TGCGTTTCCTCCATGTTGGA	84	336.46	p53 CDE Pos		CSH2	TGCGTTTCCTCCATGTTGGA	61	165.372	p53 CDE Pos		CSH2	TGCGTTTCCTCCATGTTGGA	52	301.948	p53 CDE Pos		CSH2	TGCGTTTCCTCCATGTTGGA	13	47.5602	p53 CDE Pos		CSH2	TGCGTTTCCTCCATGTTGGA	52	163.328	p53 CDE Pos
CSH2	TTGCGTTTCCTCCATGTTGG	85	435.719	p53 CDE Pos		CSH2	TTGCGTTTCCTCCATGTTGG	106	406.562	p53 CDE Pos		CSH2	TTGCGTTTCCTCCATGTTGG	71	198.207	p53 CDE Pos		CSH2	TTGCGTTTCCTCCATGTTGG	135	540.74	p53 CDE Pos		CSH2	TTGCGTTTCCTCCATGTTGG	158	428.341	p53 CDE Pos		CSH2	TTGCGTTTCCTCCATGTTGG	72	418.082	p53 CDE Pos		CSH2	TTGCGTTTCCTCCATGTTGG	42	153.656	p53 CDE Pos		CSH2	TTGCGTTTCCTCCATGTTGG	110	345.502	p53 CDE Pos
CSNK2A2	ACAATGTTCGTGTAGCCTCA	50	256.305	p53 CDE Neg		CSNK2A2	ACAATGTTCGTGTAGCCTCA	12	46.0259	p53 CDE Neg		CSNK2A2	ACAATGTTCGTGTAGCCTCA	55	153.54	p53 CDE Neg		CSNK2A2	ACAATGTTCGTGTAGCCTCA	42	168.23	p53 CDE Neg		CSNK2A2	ACAATGTTCGTGTAGCCTCA	78	211.459	p53 CDE Neg		CSNK2A2	ACAATGTTCGTGTAGCCTCA	44	255.495	p53 CDE Neg		CSNK2A2	ACAATGTTCGTGTAGCCTCA	0	0	p53 CDE Neg		CSNK2A2	ACAATGTTCGTGTAGCCTCA	15	47.114	p53 CDE Neg
CSNK2A2	ACAGAGACTGACTGCCAAAG	86	440.845	p53 CDE Neg		CSNK2A2	ACAGAGACTGACTGCCAAAG	86	329.852	p53 CDE Neg		CSNK2A2	ACAGAGACTGACTGCCAAAG	197	549.954	p53 CDE Neg		CSNK2A2	ACAGAGACTGACTGCCAAAG	53	212.29	p53 CDE Neg		CSNK2A2	ACAGAGACTGACTGCCAAAG	164	444.607	p53 CDE Neg		CSNK2A2	ACAGAGACTGACTGCCAAAG	64	371.628	p53 CDE Neg		CSNK2A2	ACAGAGACTGACTGCCAAAG	42	153.656	p53 CDE Neg		CSNK2A2	ACAGAGACTGACTGCCAAAG	120	376.912	p53 CDE Neg
CSNK2A2	CAAGGGACCAGAGCTCCTCG	15	76.8915	p53 CDE Neg		CSNK2A2	CAAGGGACCAGAGCTCCTCG	28	107.394	p53 CDE Neg		CSNK2A2	CAAGGGACCAGAGCTCCTCG	61	170.29	p53 CDE Neg		CSNK2A2	CAAGGGACCAGAGCTCCTCG	24	96.1315	p53 CDE Neg		CSNK2A2	CAAGGGACCAGAGCTCCTCG	34	92.1746	p53 CDE Neg		CSNK2A2	CAAGGGACCAGAGCTCCTCG	13	75.487	p53 CDE Neg		CSNK2A2	CAAGGGACCAGAGCTCCTCG	62	226.825	p53 CDE Neg		CSNK2A2	CAAGGGACCAGAGCTCCTCG	95	298.388	p53 CDE Neg
CSNK2A2	CAGACACCTTGTCAGCCCTG	25	128.153	p53 CDE Neg		CSNK2A2	CAGACACCTTGTCAGCCCTG	45	172.597	p53 CDE Neg		CSNK2A2	CAGACACCTTGTCAGCCCTG	56	156.332	p53 CDE Neg		CSNK2A2	CAGACACCTTGTCAGCCCTG	52	208.285	p53 CDE Neg		CSNK2A2	CAGACACCTTGTCAGCCCTG	49	132.84	p53 CDE Neg		CSNK2A2	CAGACACCTTGTCAGCCCTG	14	81.2937	p53 CDE Neg		CSNK2A2	CAGACACCTTGTCAGCCCTG	159	581.697	p53 CDE Neg		CSNK2A2	CAGACACCTTGTCAGCCCTG	16	50.2549	p53 CDE Neg
CSNK2A2	CCCAGGATATCGTTGAAGTG	56	287.062	p53 CDE Neg		CSNK2A2	CCCAGGATATCGTTGAAGTG	42	161.091	p53 CDE Neg		CSNK2A2	CCCAGGATATCGTTGAAGTG	125	348.955	p53 CDE Neg		CSNK2A2	CCCAGGATATCGTTGAAGTG	37	148.203	p53 CDE Neg		CSNK2A2	CCCAGGATATCGTTGAAGTG	100	271.102	p53 CDE Neg		CSNK2A2	CCCAGGATATCGTTGAAGTG	45	261.301	p53 CDE Neg		CSNK2A2	CCCAGGATATCGTTGAAGTG	91	332.921	p53 CDE Neg		CSNK2A2	CCCAGGATATCGTTGAAGTG	189	593.636	p53 CDE Neg
CSNK2A2	GCCCGGATGACTCCTGGCCG	45	230.675	p53 CDE Neg		CSNK2A2	GCCCGGATGACTCCTGGCCG	40	153.42	p53 CDE Neg		CSNK2A2	GCCCGGATGACTCCTGGCCG	137	382.455	p53 CDE Neg		CSNK2A2	GCCCGGATGACTCCTGGCCG	107	428.586	p53 CDE Neg		CSNK2A2	GCCCGGATGACTCCTGGCCG	42	113.863	p53 CDE Neg		CSNK2A2	GCCCGGATGACTCCTGGCCG	32	185.814	p53 CDE Neg		CSNK2A2	GCCCGGATGACTCCTGGCCG	11	40.2432	p53 CDE Neg		CSNK2A2	GCCCGGATGACTCCTGGCCG	25	78.5233	p53 CDE Neg
CSNK2A2	TATTCCTTAGAAGTTCCACC	35	179.414	p53 CDE Neg		CSNK2A2	TATTCCTTAGAAGTTCCACC	24	92.0517	p53 CDE Neg		CSNK2A2	TATTCCTTAGAAGTTCCACC	15	41.8746	p53 CDE Neg		CSNK2A2	TATTCCTTAGAAGTTCCACC	63	252.345	p53 CDE Neg		CSNK2A2	TATTCCTTAGAAGTTCCACC	36	97.5967	p53 CDE Neg		CSNK2A2	TATTCCTTAGAAGTTCCACC	9	52.2603	p53 CDE Neg		CSNK2A2	TATTCCTTAGAAGTTCCACC	7	25.6093	p53 CDE Neg		CSNK2A2	TATTCCTTAGAAGTTCCACC	34	106.792	p53 CDE Neg
CSNK2A2	TCACCCCCAGATCAGCCCGG	10	51.261	p53 CDE Neg		CSNK2A2	TCACCCCCAGATCAGCCCGG	21	80.5453	p53 CDE Neg		CSNK2A2	TCACCCCCAGATCAGCCCGG	18	50.2496	p53 CDE Neg		CSNK2A2	TCACCCCCAGATCAGCCCGG	31	124.17	p53 CDE Neg		CSNK2A2	TCACCCCCAGATCAGCCCGG	23	62.3534	p53 CDE Neg		CSNK2A2	TCACCCCCAGATCAGCCCGG	9	52.2603	p53 CDE Neg		CSNK2A2	TCACCCCCAGATCAGCCCGG	2	7.31695	p53 CDE Neg		CSNK2A2	TCACCCCCAGATCAGCCCGG	0	0	p53 CDE Neg
CSNK2A2	TGGTCCCTTGAAGTACCTTG	9	46.1349	p53 CDE Neg		CSNK2A2	TGGTCCCTTGAAGTACCTTG	26	99.7227	p53 CDE Neg		CSNK2A2	TGGTCCCTTGAAGTACCTTG	9	25.1248	p53 CDE Neg		CSNK2A2	TGGTCCCTTGAAGTACCTTG	6	24.0329	p53 CDE Neg		CSNK2A2	TGGTCCCTTGAAGTACCTTG	48	130.129	p53 CDE Neg		CSNK2A2	TGGTCCCTTGAAGTACCTTG	20	116.134	p53 CDE Neg		CSNK2A2	TGGTCCCTTGAAGTACCTTG	31	113.413	p53 CDE Neg		CSNK2A2	TGGTCCCTTGAAGTACCTTG	71	223.006	p53 CDE Neg
CSNK2A2	TGTTGATGCTTGGCACCAGG	74	379.332	p53 CDE Neg		CSNK2A2	TGTTGATGCTTGGCACCAGG	79	303.004	p53 CDE Neg		CSNK2A2	TGTTGATGCTTGGCACCAGG	147	410.372	p53 CDE Neg		CSNK2A2	TGTTGATGCTTGGCACCAGG	131	524.718	p53 CDE Neg		CSNK2A2	TGTTGATGCTTGGCACCAGG	155	420.208	p53 CDE Neg		CSNK2A2	TGTTGATGCTTGGCACCAGG	50	290.335	p53 CDE Neg		CSNK2A2	TGTTGATGCTTGGCACCAGG	58	212.191	p53 CDE Neg		CSNK2A2	TGTTGATGCTTGGCACCAGG	25	78.5233	p53 CDE Neg
CSPP1	AGGACGTCATCTTCAATGGC	39	199.918	p53 CDE Pos		CSPP1	AGGACGTCATCTTCAATGGC	44	168.761	p53 CDE Pos		CSPP1	AGGACGTCATCTTCAATGGC	147	410.372	p53 CDE Pos		CSPP1	AGGACGTCATCTTCAATGGC	64	256.351	p53 CDE Pos		CSPP1	AGGACGTCATCTTCAATGGC	32	86.7526	p53 CDE Pos		CSPP1	AGGACGTCATCTTCAATGGC	17	98.7138	p53 CDE Pos		CSPP1	AGGACGTCATCTTCAATGGC	36	131.705	p53 CDE Pos		CSPP1	AGGACGTCATCTTCAATGGC	61	191.597	p53 CDE Pos
CSPP1	AGTGCTCTAGAGGATCGTCG	16	82.0176	p53 CDE Pos		CSPP1	AGTGCTCTAGAGGATCGTCG	22	84.3807	p53 CDE Pos		CSPP1	AGTGCTCTAGAGGATCGTCG	107	298.706	p53 CDE Pos		CSPP1	AGTGCTCTAGAGGATCGTCG	34	136.186	p53 CDE Pos		CSPP1	AGTGCTCTAGAGGATCGTCG	29	78.6195	p53 CDE Pos		CSPP1	AGTGCTCTAGAGGATCGTCG	9	52.2603	p53 CDE Pos		CSPP1	AGTGCTCTAGAGGATCGTCG	2	7.31695	p53 CDE Pos		CSPP1	AGTGCTCTAGAGGATCGTCG	6	18.8456	p53 CDE Pos
CSPP1	CCAAATAGTCAACAGACCAG	40	205.044	p53 CDE Pos		CSPP1	CCAAATAGTCAACAGACCAG	123	471.765	p53 CDE Pos		CSPP1	CCAAATAGTCAACAGACCAG	112	312.664	p53 CDE Pos		CSPP1	CCAAATAGTCAACAGACCAG	195	781.069	p53 CDE Pos		CSPP1	CCAAATAGTCAACAGACCAG	158	428.341	p53 CDE Pos		CSPP1	CCAAATAGTCAACAGACCAG	67	389.049	p53 CDE Pos		CSPP1	CCAAATAGTCAACAGACCAG	11	40.2432	p53 CDE Pos		CSPP1	CCAAATAGTCAACAGACCAG	7	21.9865	p53 CDE Pos
CSPP1	CGCAGGAGGAACAAATGGAA	23	117.9	p53 CDE Pos		CSPP1	CGCAGGAGGAACAAATGGAA	29	111.229	p53 CDE Pos		CSPP1	CGCAGGAGGAACAAATGGAA	55	153.54	p53 CDE Pos		CSPP1	CGCAGGAGGAACAAATGGAA	42	168.23	p53 CDE Pos		CSPP1	CGCAGGAGGAACAAATGGAA	35	94.8857	p53 CDE Pos		CSPP1	CGCAGGAGGAACAAATGGAA	20	116.134	p53 CDE Pos		CSPP1	CGCAGGAGGAACAAATGGAA	9	32.9263	p53 CDE Pos		CSPP1	CGCAGGAGGAACAAATGGAA	2	6.28186	p53 CDE Pos
CSPP1	CGTCCTAATGTAGCACCAGA	30	153.783	p53 CDE Pos		CSPP1	CGTCCTAATGTAGCACCAGA	70	268.484	p53 CDE Pos		CSPP1	CGTCCTAATGTAGCACCAGA	83	231.706	p53 CDE Pos		CSPP1	CGTCCTAATGTAGCACCAGA	61	244.334	p53 CDE Pos		CSPP1	CGTCCTAATGTAGCACCAGA	99	268.391	p53 CDE Pos		CSPP1	CGTCCTAATGTAGCACCAGA	34	197.428	p53 CDE Pos		CSPP1	CGTCCTAATGTAGCACCAGA	25	91.4619	p53 CDE Pos		CSPP1	CGTCCTAATGTAGCACCAGA	6	18.8456	p53 CDE Pos
CSPP1	GCAGAGGGCAACTGTGATGG	36	184.54	p53 CDE Pos		CSPP1	GCAGAGGGCAACTGTGATGG	33	126.571	p53 CDE Pos		CSPP1	GCAGAGGGCAACTGTGATGG	37	103.291	p53 CDE Pos		CSPP1	GCAGAGGGCAACTGTGATGG	65	260.356	p53 CDE Pos		CSPP1	GCAGAGGGCAACTGTGATGG	65	176.216	p53 CDE Pos		CSPP1	GCAGAGGGCAACTGTGATGG	26	150.974	p53 CDE Pos		CSPP1	GCAGAGGGCAACTGTGATGG	13	47.5602	p53 CDE Pos		CSPP1	GCAGAGGGCAACTGTGATGG	11	34.5502	p53 CDE Pos
CSPP1	GCAGGTGGAAAAGAGTACTG	24	123.026	p53 CDE Pos		CSPP1	GCAGGTGGAAAAGAGTACTG	15	57.5323	p53 CDE Pos		CSPP1	GCAGGTGGAAAAGAGTACTG	56	156.332	p53 CDE Pos		CSPP1	GCAGGTGGAAAAGAGTACTG	10	40.0548	p53 CDE Pos		CSPP1	GCAGGTGGAAAAGAGTACTG	29	78.6195	p53 CDE Pos		CSPP1	GCAGGTGGAAAAGAGTACTG	18	104.521	p53 CDE Pos		CSPP1	GCAGGTGGAAAAGAGTACTG	0	0	p53 CDE Pos		CSPP1	GCAGGTGGAAAAGAGTACTG	0	0	p53 CDE Pos
CSPP1	GGATGCACAGGAACAAACGA	42	215.296	p53 CDE Pos		CSPP1	GGATGCACAGGAACAAACGA	61	233.965	p53 CDE Pos		CSPP1	GGATGCACAGGAACAAACGA	61	170.29	p53 CDE Pos		CSPP1	GGATGCACAGGAACAAACGA	78	312.427	p53 CDE Pos		CSPP1	GGATGCACAGGAACAAACGA	83	225.015	p53 CDE Pos		CSPP1	GGATGCACAGGAACAAACGA	27	156.781	p53 CDE Pos		CSPP1	GGATGCACAGGAACAAACGA	42	153.656	p53 CDE Pos		CSPP1	GGATGCACAGGAACAAACGA	55	172.751	p53 CDE Pos
CSPP1	TCGTACTTTAGCACTTGGGA	69	353.701	p53 CDE Pos		CSPP1	TCGTACTTTAGCACTTGGGA	84	322.181	p53 CDE Pos		CSPP1	TCGTACTTTAGCACTTGGGA	78	217.748	p53 CDE Pos		CSPP1	TCGTACTTTAGCACTTGGGA	60	240.329	p53 CDE Pos		CSPP1	TCGTACTTTAGCACTTGGGA	87	235.859	p53 CDE Pos		CSPP1	TCGTACTTTAGCACTTGGGA	36	209.041	p53 CDE Pos		CSPP1	TCGTACTTTAGCACTTGGGA	0	0	p53 CDE Pos		CSPP1	TCGTACTTTAGCACTTGGGA	1	3.14093	p53 CDE Pos
CSPP1	TGAGCTTAGAGTGAGAAATG	43	220.422	p53 CDE Pos		CSPP1	TGAGCTTAGAGTGAGAAATG	61	233.965	p53 CDE Pos		CSPP1	TGAGCTTAGAGTGAGAAATG	76	212.165	p53 CDE Pos		CSPP1	TGAGCTTAGAGTGAGAAATG	51	204.279	p53 CDE Pos		CSPP1	TGAGCTTAGAGTGAGAAATG	72	195.193	p53 CDE Pos		CSPP1	TGAGCTTAGAGTGAGAAATG	34	197.428	p53 CDE Pos		CSPP1	TGAGCTTAGAGTGAGAAATG	0	0	p53 CDE Pos		CSPP1	TGAGCTTAGAGTGAGAAATG	15	47.114	p53 CDE Pos
CTAGE4	ACTCTACAGGAAATTAACAG	64	328.071	p53 CDE Pos		CTAGE4	ACTCTACAGGAAATTAACAG	35	134.242	p53 CDE Pos		CTAGE4	ACTCTACAGGAAATTAACAG	67	187.04	p53 CDE Pos		CTAGE4	ACTCTACAGGAAATTAACAG	24	96.1315	p53 CDE Pos		CTAGE4	ACTCTACAGGAAATTAACAG	79	214.17	p53 CDE Pos		CTAGE4	ACTCTACAGGAAATTAACAG	58	336.788	p53 CDE Pos		CTAGE4	ACTCTACAGGAAATTAACAG	45	164.631	p53 CDE Pos		CTAGE4	ACTCTACAGGAAATTAACAG	13	40.8321	p53 CDE Pos
CTAGE4	AGGTAAGGAGGTAAACCCCT	20	102.522	p53 CDE Pos		CTAGE4	AGGTAAGGAGGTAAACCCCT	38	145.749	p53 CDE Pos		CTAGE4	AGGTAAGGAGGTAAACCCCT	54	150.749	p53 CDE Pos		CTAGE4	AGGTAAGGAGGTAAACCCCT	49	196.268	p53 CDE Pos		CTAGE4	AGGTAAGGAGGTAAACCCCT	54	146.395	p53 CDE Pos		CTAGE4	AGGTAAGGAGGTAAACCCCT	27	156.781	p53 CDE Pos		CTAGE4	AGGTAAGGAGGTAAACCCCT	0	0	p53 CDE Pos		CTAGE4	AGGTAAGGAGGTAAACCCCT	2	6.28186	p53 CDE Pos
CTAGE4	GCTCCAAACATGGTTCCTGG	47	240.927	p53 CDE Pos		CTAGE4	GCTCCAAACATGGTTCCTGG	85	326.017	p53 CDE Pos		CTAGE4	GCTCCAAACATGGTTCCTGG	127	354.539	p53 CDE Pos		CTAGE4	GCTCCAAACATGGTTCCTGG	46	184.252	p53 CDE Pos		CTAGE4	GCTCCAAACATGGTTCCTGG	150	406.653	p53 CDE Pos		CTAGE4	GCTCCAAACATGGTTCCTGG	39	226.461	p53 CDE Pos		CTAGE4	GCTCCAAACATGGTTCCTGG	15	54.8771	p53 CDE Pos		CTAGE4	GCTCCAAACATGGTTCCTGG	42	131.919	p53 CDE Pos
CTAGE4	GTTAGGAGTCGGCTTTACGT	15	76.8915	p53 CDE Pos		CTAGE4	GTTAGGAGTCGGCTTTACGT	11	42.1904	p53 CDE Pos		CTAGE4	GTTAGGAGTCGGCTTTACGT	35	97.7075	p53 CDE Pos		CTAGE4	GTTAGGAGTCGGCTTTACGT	15	60.0822	p53 CDE Pos		CTAGE4	GTTAGGAGTCGGCTTTACGT	44	119.285	p53 CDE Pos		CTAGE4	GTTAGGAGTCGGCTTTACGT	16	92.9071	p53 CDE Pos		CTAGE4	GTTAGGAGTCGGCTTTACGT	0	0	p53 CDE Pos		CTAGE4	GTTAGGAGTCGGCTTTACGT	0	0	p53 CDE Pos
CTAGE4	TAAGGAGGTAAACCCCTCGG	24	123.026	p53 CDE Pos		CTAGE4	TAAGGAGGTAAACCCCTCGG	32	122.736	p53 CDE Pos		CTAGE4	TAAGGAGGTAAACCCCTCGG	14	39.083	p53 CDE Pos		CTAGE4	TAAGGAGGTAAACCCCTCGG	8	32.0438	p53 CDE Pos		CTAGE4	TAAGGAGGTAAACCCCTCGG	62	168.083	p53 CDE Pos		CTAGE4	TAAGGAGGTAAACCCCTCGG	50	290.335	p53 CDE Pos		CTAGE4	TAAGGAGGTAAACCCCTCGG	0	0	p53 CDE Pos		CTAGE4	TAAGGAGGTAAACCCCTCGG	4	12.5637	p53 CDE Pos
CTAGE4	TCAACAAGATGAATTGATGG	9	46.1349	p53 CDE Pos		CTAGE4	TCAACAAGATGAATTGATGG	18	69.0388	p53 CDE Pos		CTAGE4	TCAACAAGATGAATTGATGG	28	78.166	p53 CDE Pos		CTAGE4	TCAACAAGATGAATTGATGG	64	256.351	p53 CDE Pos		CTAGE4	TCAACAAGATGAATTGATGG	30	81.3306	p53 CDE Pos		CTAGE4	TCAACAAGATGAATTGATGG	21	121.941	p53 CDE Pos		CTAGE4	TCAACAAGATGAATTGATGG	41	149.997	p53 CDE Pos		CTAGE4	TCAACAAGATGAATTGATGG	27	84.8051	p53 CDE Pos
CTAGE4	TGAGAAACATCTATCCACCG	24	123.026	p53 CDE Pos		CTAGE4	TGAGAAACATCTATCCACCG	21	80.5453	p53 CDE Pos		CTAGE4	TGAGAAACATCTATCCACCG	25	69.7911	p53 CDE Pos		CTAGE4	TGAGAAACATCTATCCACCG	25	100.137	p53 CDE Pos		CTAGE4	TGAGAAACATCTATCCACCG	50	135.551	p53 CDE Pos		CTAGE4	TGAGAAACATCTATCCACCG	8	46.4536	p53 CDE Pos		CTAGE4	TGAGAAACATCTATCCACCG	14	51.2186	p53 CDE Pos		CTAGE4	TGAGAAACATCTATCCACCG	24	75.3823	p53 CDE Pos
CTAGE4	TGTGCTTGAAGAAGACACAA	0	0	p53 CDE Pos		CTAGE4	TGTGCTTGAAGAAGACACAA	0	0	p53 CDE Pos		CTAGE4	TGTGCTTGAAGAAGACACAA	0	0	p53 CDE Pos		CTAGE4	TGTGCTTGAAGAAGACACAA	0	0	p53 CDE Pos		CTAGE4	TGTGCTTGAAGAAGACACAA	0	0	p53 CDE Pos		CTAGE4	TGTGCTTGAAGAAGACACAA	0	0	p53 CDE Pos		CTAGE4	TGTGCTTGAAGAAGACACAA	0	0	p53 CDE Pos		CTAGE4	TGTGCTTGAAGAAGACACAA	0	0	p53 CDE Pos
CTAGE4	TGTGCTTGAAGAAGACACAA	0	0	p53 CDE Pos		CTAGE4	TGTGCTTGAAGAAGACACAA	0	0	p53 CDE Pos		CTAGE4	TGTGCTTGAAGAAGACACAA	0	0	p53 CDE Pos		CTAGE4	TGTGCTTGAAGAAGACACAA	0	0	p53 CDE Pos		CTAGE4	TGTGCTTGAAGAAGACACAA	0	0	p53 CDE Pos		CTAGE4	TGTGCTTGAAGAAGACACAA	0	0	p53 CDE Pos		CTAGE4	TGTGCTTGAAGAAGACACAA	0	0	p53 CDE Pos		CTAGE4	TGTGCTTGAAGAAGACACAA	0	0	p53 CDE Pos
CTAGE4	TTAAAATGAGTGAAGAACGA	34	174.287	p53 CDE Pos		CTAGE4	TTAAAATGAGTGAAGAACGA	49	187.939	p53 CDE Pos		CTAGE4	TTAAAATGAGTGAAGAACGA	52	145.165	p53 CDE Pos		CTAGE4	TTAAAATGAGTGAAGAACGA	115	460.63	p53 CDE Pos		CTAGE4	TTAAAATGAGTGAAGAACGA	50	135.551	p53 CDE Pos		CTAGE4	TTAAAATGAGTGAAGAACGA	29	168.394	p53 CDE Pos		CTAGE4	TTAAAATGAGTGAAGAACGA	5	18.2924	p53 CDE Pos		CTAGE4	TTAAAATGAGTGAAGAACGA	3	9.42279	p53 CDE Pos
CTNNB1	AAGGTTATGCAAGGTCCCAG	21	107.648	p53 CDE Pos		CTNNB1	AAGGTTATGCAAGGTCCCAG	27	103.558	p53 CDE Pos		CTNNB1	AAGGTTATGCAAGGTCCCAG	19	53.0412	p53 CDE Pos		CTNNB1	AAGGTTATGCAAGGTCCCAG	28	112.153	p53 CDE Pos		CTNNB1	AAGGTTATGCAAGGTCCCAG	73	197.904	p53 CDE Pos		CTNNB1	AAGGTTATGCAAGGTCCCAG	24	139.361	p53 CDE Pos		CTNNB1	AAGGTTATGCAAGGTCCCAG	222	812.181	p53 CDE Pos		CTNNB1	AAGGTTATGCAAGGTCCCAG	371	1165.29	p53 CDE Pos
CTNNB1	ATGATGGTCTGCCAAGTGGG	79	404.962	p53 CDE Pos		CTNNB1	ATGATGGTCTGCCAAGTGGG	146	559.981	p53 CDE Pos		CTNNB1	ATGATGGTCTGCCAAGTGGG	99	276.373	p53 CDE Pos		CTNNB1	ATGATGGTCTGCCAAGTGGG	134	536.734	p53 CDE Pos		CTNNB1	ATGATGGTCTGCCAAGTGGG	223	604.557	p53 CDE Pos		CTNNB1	ATGATGGTCTGCCAAGTGGG	48	278.721	p53 CDE Pos		CTNNB1	ATGATGGTCTGCCAAGTGGG	59	215.85	p53 CDE Pos		CTNNB1	ATGATGGTCTGCCAAGTGGG	42	131.919	p53 CDE Pos
CTNNB1	CACAACCGAATTGTTATCAG	24	123.026	p53 CDE Pos		CTNNB1	CACAACCGAATTGTTATCAG	49	187.939	p53 CDE Pos		CTNNB1	CACAACCGAATTGTTATCAG	40	111.666	p53 CDE Pos		CTNNB1	CACAACCGAATTGTTATCAG	23	92.126	p53 CDE Pos		CTNNB1	CACAACCGAATTGTTATCAG	66	178.927	p53 CDE Pos		CTNNB1	CACAACCGAATTGTTATCAG	23	133.554	p53 CDE Pos		CTNNB1	CACAACCGAATTGTTATCAG	1	3.65847	p53 CDE Pos		CTNNB1	CACAACCGAATTGTTATCAG	0	0	p53 CDE Pos
CTNNB1	CATGGAACCAGACAGAAAAG	45	230.675	p53 CDE Pos		CTNNB1	CATGGAACCAGACAGAAAAG	76	291.497	p53 CDE Pos		CTNNB1	CATGGAACCAGACAGAAAAG	86	240.081	p53 CDE Pos		CTNNB1	CATGGAACCAGACAGAAAAG	88	352.482	p53 CDE Pos		CTNNB1	CATGGAACCAGACAGAAAAG	146	395.809	p53 CDE Pos		CTNNB1	CATGGAACCAGACAGAAAAG	47	272.915	p53 CDE Pos		CTNNB1	CATGGAACCAGACAGAAAAG	114	417.066	p53 CDE Pos		CTNNB1	CATGGAACCAGACAGAAAAG	84	263.838	p53 CDE Pos
CTNNB1	CCACTCATACAGGACTTGGG	36	184.54	p53 CDE Pos		CTNNB1	CCACTCATACAGGACTTGGG	32	122.736	p53 CDE Pos		CTNNB1	CCACTCATACAGGACTTGGG	75	209.373	p53 CDE Pos		CTNNB1	CCACTCATACAGGACTTGGG	37	148.203	p53 CDE Pos		CTNNB1	CCACTCATACAGGACTTGGG	74	200.615	p53 CDE Pos		CTNNB1	CCACTCATACAGGACTTGGG	15	87.1004	p53 CDE Pos		CTNNB1	CCACTCATACAGGACTTGGG	37	135.364	p53 CDE Pos		CTNNB1	CCACTCATACAGGACTTGGG	137	430.307	p53 CDE Pos
CTNNB1	GAAATAGTTGAAGGTTGTAC	64	328.071	p53 CDE Pos		CTNNB1	GAAATAGTTGAAGGTTGTAC	61	233.965	p53 CDE Pos		CTNNB1	GAAATAGTTGAAGGTTGTAC	163	455.038	p53 CDE Pos		CTNNB1	GAAATAGTTGAAGGTTGTAC	178	712.975	p53 CDE Pos		CTNNB1	GAAATAGTTGAAGGTTGTAC	93	252.125	p53 CDE Pos		CTNNB1	GAAATAGTTGAAGGTTGTAC	48	278.721	p53 CDE Pos		CTNNB1	GAAATAGTTGAAGGTTGTAC	112	409.749	p53 CDE Pos		CTNNB1	GAAATAGTTGAAGGTTGTAC	103	323.516	p53 CDE Pos
CTNNB1	GAGCCTCTATACCACCCACT	65	333.197	p53 CDE Pos		CTNNB1	GAGCCTCTATACCACCCACT	61	233.965	p53 CDE Pos		CTNNB1	GAGCCTCTATACCACCCACT	128	357.33	p53 CDE Pos		CTNNB1	GAGCCTCTATACCACCCACT	69	276.378	p53 CDE Pos		CTNNB1	GAGCCTCTATACCACCCACT	95	257.547	p53 CDE Pos		CTNNB1	GAGCCTCTATACCACCCACT	35	203.234	p53 CDE Pos		CTNNB1	GAGCCTCTATACCACCCACT	520	1902.41	p53 CDE Pos		CTNNB1	GAGCCTCTATACCACCCACT	548	1721.23	p53 CDE Pos
CTNNB1	GGGTTCAGATGATATAAATG	62	317.818	p53 CDE Pos		CTNNB1	GGGTTCAGATGATATAAATG	82	314.51	p53 CDE Pos		CTNNB1	GGGTTCAGATGATATAAATG	134	374.08	p53 CDE Pos		CTNNB1	GGGTTCAGATGATATAAATG	67	268.367	p53 CDE Pos		CTNNB1	GGGTTCAGATGATATAAATG	106	287.368	p53 CDE Pos		CTNNB1	GGGTTCAGATGATATAAATG	58	336.788	p53 CDE Pos		CTNNB1	GGGTTCAGATGATATAAATG	26	95.1203	p53 CDE Pos		CTNNB1	GGGTTCAGATGATATAAATG	4	12.5637	p53 CDE Pos
CTNNB1	TGTCTGCTCTAGTAATAAGC	56	287.062	p53 CDE Pos		CTNNB1	TGTCTGCTCTAGTAATAAGC	64	245.471	p53 CDE Pos		CTNNB1	TGTCTGCTCTAGTAATAAGC	107	298.706	p53 CDE Pos		CTNNB1	TGTCTGCTCTAGTAATAAGC	114	456.625	p53 CDE Pos		CTNNB1	TGTCTGCTCTAGTAATAAGC	104	281.946	p53 CDE Pos		CTNNB1	TGTCTGCTCTAGTAATAAGC	42	243.881	p53 CDE Pos		CTNNB1	TGTCTGCTCTAGTAATAAGC	27	98.7788	p53 CDE Pos		CTNNB1	TGTCTGCTCTAGTAATAAGC	14	43.973	p53 CDE Pos
CTNNB1	TTAGTCCTCTGATAACAATT	95	486.98	p53 CDE Pos		CTNNB1	TTAGTCCTCTGATAACAATT	113	433.41	p53 CDE Pos		CTNNB1	TTAGTCCTCTGATAACAATT	140	390.83	p53 CDE Pos		CTNNB1	TTAGTCCTCTGATAACAATT	109	436.597	p53 CDE Pos		CTNNB1	TTAGTCCTCTGATAACAATT	183	496.116	p53 CDE Pos		CTNNB1	TTAGTCCTCTGATAACAATT	102	592.283	p53 CDE Pos		CTNNB1	TTAGTCCTCTGATAACAATT	188	687.793	p53 CDE Pos		CTNNB1	TTAGTCCTCTGATAACAATT	111	348.643	p53 CDE Pos
CTSC	AAATGAGTAGCAGCTGCCAC	61	312.692	p53 CDE Neutral		CTSC	AAATGAGTAGCAGCTGCCAC	59	226.294	p53 CDE Neutral		CTSC	AAATGAGTAGCAGCTGCCAC	64	178.665	p53 CDE Neutral		CTSC	AAATGAGTAGCAGCTGCCAC	52	208.285	p53 CDE Neutral		CTSC	AAATGAGTAGCAGCTGCCAC	57	154.528	p53 CDE Neutral		CTSC	AAATGAGTAGCAGCTGCCAC	61	354.208	p53 CDE Neutral		CTSC	AAATGAGTAGCAGCTGCCAC	27	98.7788	p53 CDE Neutral		CTSC	AAATGAGTAGCAGCTGCCAC	757	2377.68	p53 CDE Neutral
CTSC	ACCACAAGAAAAAAAAGTAG	83	425.466	p53 CDE Neutral		CTSC	ACCACAAGAAAAAAAAGTAG	85	326.017	p53 CDE Neutral		CTSC	ACCACAAGAAAAAAAAGTAG	76	212.165	p53 CDE Neutral		CTSC	ACCACAAGAAAAAAAAGTAG	47	188.258	p53 CDE Neutral		CTSC	ACCACAAGAAAAAAAAGTAG	86	233.148	p53 CDE Neutral		CTSC	ACCACAAGAAAAAAAAGTAG	68	394.855	p53 CDE Neutral		CTSC	ACCACAAGAAAAAAAAGTAG	167	610.965	p53 CDE Neutral		CTSC	ACCACAAGAAAAAAAAGTAG	96	301.529	p53 CDE Neutral
CTSC	ATTTGCCAACATCTTGGGAC	42	215.296	p53 CDE Neutral		CTSC	ATTTGCCAACATCTTGGGAC	43	164.926	p53 CDE Neutral		CTSC	ATTTGCCAACATCTTGGGAC	46	128.416	p53 CDE Neutral		CTSC	ATTTGCCAACATCTTGGGAC	85	340.466	p53 CDE Neutral		CTSC	ATTTGCCAACATCTTGGGAC	67	181.638	p53 CDE Neutral		CTSC	ATTTGCCAACATCTTGGGAC	24	139.361	p53 CDE Neutral		CTSC	ATTTGCCAACATCTTGGGAC	50	182.924	p53 CDE Neutral		CTSC	ATTTGCCAACATCTTGGGAC	65	204.16	p53 CDE Neutral
CTSC	CCAGCGCGATGTCAACTGCT	29	148.657	p53 CDE Neutral		CTSC	CCAGCGCGATGTCAACTGCT	44	168.761	p53 CDE Neutral		CTSC	CCAGCGCGATGTCAACTGCT	52	145.165	p53 CDE Neutral		CTSC	CCAGCGCGATGTCAACTGCT	52	208.285	p53 CDE Neutral		CTSC	CCAGCGCGATGTCAACTGCT	73	197.904	p53 CDE Neutral		CTSC	CCAGCGCGATGTCAACTGCT	41	238.074	p53 CDE Neutral		CTSC	CCAGCGCGATGTCAACTGCT	1334	4880.4	p53 CDE Neutral		CTSC	CCAGCGCGATGTCAACTGCT	2098	6589.67	p53 CDE Neutral
CTSC	CTACAAGACACAACCTCCTG	91	466.475	p53 CDE Neutral		CTSC	CTACAAGACACAACCTCCTG	54	207.116	p53 CDE Neutral		CTSC	CTACAAGACACAACCTCCTG	182	508.079	p53 CDE Neutral		CTSC	CTACAAGACACAACCTCCTG	64	256.351	p53 CDE Neutral		CTSC	CTACAAGACACAACCTCCTG	125	338.877	p53 CDE Neutral		CTSC	CTACAAGACACAACCTCCTG	27	156.781	p53 CDE Neutral		CTSC	CTACAAGACACAACCTCCTG	2	7.31695	p53 CDE Neutral		CTSC	CTACAAGACACAACCTCCTG	1	3.14093	p53 CDE Neutral
CTSC	GACCCCAATCCTAAGCCCTC	32	164.035	p53 CDE Neutral		CTSC	GACCCCAATCCTAAGCCCTC	29	111.229	p53 CDE Neutral		CTSC	GACCCCAATCCTAAGCCCTC	28	78.166	p53 CDE Neutral		CTSC	GACCCCAATCCTAAGCCCTC	12	48.0658	p53 CDE Neutral		CTSC	GACCCCAATCCTAAGCCCTC	79	214.17	p53 CDE Neutral		CTSC	GACCCCAATCCTAAGCCCTC	38	220.654	p53 CDE Neutral		CTSC	GACCCCAATCCTAAGCCCTC	17	62.1941	p53 CDE Neutral		CTSC	GACCCCAATCCTAAGCCCTC	13	40.8321	p53 CDE Neutral
CTSC	GGTGCCCAGCAGGTCAAGAT	33	169.161	p53 CDE Neutral		CTSC	GGTGCCCAGCAGGTCAAGAT	54	207.116	p53 CDE Neutral		CTSC	GGTGCCCAGCAGGTCAAGAT	72	200.998	p53 CDE Neutral		CTSC	GGTGCCCAGCAGGTCAAGAT	79	316.433	p53 CDE Neutral		CTSC	GGTGCCCAGCAGGTCAAGAT	50	135.551	p53 CDE Neutral		CTSC	GGTGCCCAGCAGGTCAAGAT	19	110.327	p53 CDE Neutral		CTSC	GGTGCCCAGCAGGTCAAGAT	5	18.2924	p53 CDE Neutral		CTSC	GGTGCCCAGCAGGTCAAGAT	0	0	p53 CDE Neutral
CTSC	TGGGACTGGAGAAATGTTCA	70	358.827	p53 CDE Neutral		CTSC	TGGGACTGGAGAAATGTTCA	64	245.471	p53 CDE Neutral		CTSC	TGGGACTGGAGAAATGTTCA	122	340.58	p53 CDE Neutral		CTSC	TGGGACTGGAGAAATGTTCA	102	408.559	p53 CDE Neutral		CTSC	TGGGACTGGAGAAATGTTCA	79	214.17	p53 CDE Neutral		CTSC	TGGGACTGGAGAAATGTTCA	47	272.915	p53 CDE Neutral		CTSC	TGGGACTGGAGAAATGTTCA	56	204.875	p53 CDE Neutral		CTSC	TGGGACTGGAGAAATGTTCA	81	254.415	p53 CDE Neutral
CTSC	TTTCTCCAGTCCCAAGATGT	72	369.079	p53 CDE Neutral		CTSC	TTTCTCCAGTCCCAAGATGT	92	352.865	p53 CDE Neutral		CTSC	TTTCTCCAGTCCCAAGATGT	164	457.829	p53 CDE Neutral		CTSC	TTTCTCCAGTCCCAAGATGT	78	312.427	p53 CDE Neutral		CTSC	TTTCTCCAGTCCCAAGATGT	176	477.139	p53 CDE Neutral		CTSC	TTTCTCCAGTCCCAAGATGT	78	452.922	p53 CDE Neutral		CTSC	TTTCTCCAGTCCCAAGATGT	70	256.093	p53 CDE Neutral		CTSC	TTTCTCCAGTCCCAAGATGT	81	254.415	p53 CDE Neutral
CTSG	ACCCGGGACGCTGTGCACTG	122	625.384	p53 CDE Neutral		CTSG	ACCCGGGACGCTGTGCACTG	201	770.933	p53 CDE Neutral		CTSG	ACCCGGGACGCTGTGCACTG	328	915.659	p53 CDE Neutral		CTSG	ACCCGGGACGCTGTGCACTG	292	1169.6	p53 CDE Neutral		CTSG	ACCCGGGACGCTGTGCACTG	215	582.869	p53 CDE Neutral		CTSG	ACCCGGGACGCTGTGCACTG	95	551.636	p53 CDE Neutral		CTSG	ACCCGGGACGCTGTGCACTG	199	728.036	p53 CDE Neutral		CTSG	ACCCGGGACGCTGTGCACTG	218	684.723	p53 CDE Neutral
CTSG	AGCTGAGCAGAAGAGTCAGA	35	179.414	p53 CDE Neutral		CTSG	AGCTGAGCAGAAGAGTCAGA	62	237.8	p53 CDE Neutral		CTSG	AGCTGAGCAGAAGAGTCAGA	51	142.374	p53 CDE Neutral		CTSG	AGCTGAGCAGAAGAGTCAGA	50	200.274	p53 CDE Neutral		CTSG	AGCTGAGCAGAAGAGTCAGA	50	135.551	p53 CDE Neutral		CTSG	AGCTGAGCAGAAGAGTCAGA	33	191.621	p53 CDE Neutral		CTSG	AGCTGAGCAGAAGAGTCAGA	82	299.995	p53 CDE Neutral		CTSG	AGCTGAGCAGAAGAGTCAGA	15	47.114	p53 CDE Neutral
CTSG	CCAGCAGGTCAGAGCAGATG	17	87.1437	p53 CDE Neutral		CTSG	CCAGCAGGTCAGAGCAGATG	5	19.1774	p53 CDE Neutral		CTSG	CCAGCAGGTCAGAGCAGATG	6	16.7499	p53 CDE Neutral		CTSG	CCAGCAGGTCAGAGCAGATG	1	4.00548	p53 CDE Neutral		CTSG	CCAGCAGGTCAGAGCAGATG	40	108.441	p53 CDE Neutral		CTSG	CCAGCAGGTCAGAGCAGATG	15	87.1004	p53 CDE Neutral		CTSG	CCAGCAGGTCAGAGCAGATG	16	58.5356	p53 CDE Neutral		CTSG	CCAGCAGGTCAGAGCAGATG	14	43.973	p53 CDE Neutral
CTSG	CTTCAGATCCAGAGTCCAGC	22	112.774	p53 CDE Neutral		CTSG	CTTCAGATCCAGAGTCCAGC	41	157.255	p53 CDE Neutral		CTSG	CTTCAGATCCAGAGTCCAGC	46	128.416	p53 CDE Neutral		CTSG	CTTCAGATCCAGAGTCCAGC	18	72.0986	p53 CDE Neutral		CTSG	CTTCAGATCCAGAGTCCAGC	39	105.73	p53 CDE Neutral		CTSG	CTTCAGATCCAGAGTCCAGC	26	150.974	p53 CDE Neutral		CTSG	CTTCAGATCCAGAGTCCAGC	25	91.4619	p53 CDE Neutral		CTSG	CTTCAGATCCAGAGTCCAGC	11	34.5502	p53 CDE Neutral
CTSG	GAATCGAAACGTGAACCCAG	16	82.0176	p53 CDE Neutral		CTSG	GAATCGAAACGTGAACCCAG	22	84.3807	p53 CDE Neutral		CTSG	GAATCGAAACGTGAACCCAG	5	13.9582	p53 CDE Neutral		CTSG	GAATCGAAACGTGAACCCAG	12	48.0658	p53 CDE Neutral		CTSG	GAATCGAAACGTGAACCCAG	48	130.129	p53 CDE Neutral		CTSG	GAATCGAAACGTGAACCCAG	5	29.0335	p53 CDE Neutral		CTSG	GAATCGAAACGTGAACCCAG	63	230.484	p53 CDE Neutral		CTSG	GAATCGAAACGTGAACCCAG	47	147.624	p53 CDE Neutral
CTSG	GCCACCCTCAATATAATCAG	0	0	p53 CDE Neutral		CTSG	GCCACCCTCAATATAATCAG	0	0	p53 CDE Neutral		CTSG	GCCACCCTCAATATAATCAG	0	0	p53 CDE Neutral		CTSG	GCCACCCTCAATATAATCAG	0	0	p53 CDE Neutral		CTSG	GCCACCCTCAATATAATCAG	0	0	p53 CDE Neutral		CTSG	GCCACCCTCAATATAATCAG	0	0	p53 CDE Neutral		CTSG	GCCACCCTCAATATAATCAG	0	0	p53 CDE Neutral		CTSG	GCCACCCTCAATATAATCAG	0	0	p53 CDE Neutral
CTSG	GCCACCCTCAATATAATCAG	0	0	p53 CDE Neutral		CTSG	GCCACCCTCAATATAATCAG	0	0	p53 CDE Neutral		CTSG	GCCACCCTCAATATAATCAG	0	0	p53 CDE Neutral		CTSG	GCCACCCTCAATATAATCAG	0	0	p53 CDE Neutral		CTSG	GCCACCCTCAATATAATCAG	0	0	p53 CDE Neutral		CTSG	GCCACCCTCAATATAATCAG	0	0	p53 CDE Neutral		CTSG	GCCACCCTCAATATAATCAG	0	0	p53 CDE Neutral		CTSG	GCCACCCTCAATATAATCAG	0	0	p53 CDE Neutral
CTSG	GCGCGCAGTGATGTGTTGCT	11	56.3871	p53 CDE Neutral		CTSG	GCGCGCAGTGATGTGTTGCT	48	184.103	p53 CDE Neutral		CTSG	GCGCGCAGTGATGTGTTGCT	81	226.123	p53 CDE Neutral		CTSG	GCGCGCAGTGATGTGTTGCT	68	272.373	p53 CDE Neutral		CTSG	GCGCGCAGTGATGTGTTGCT	94	254.836	p53 CDE Neutral		CTSG	GCGCGCAGTGATGTGTTGCT	45	261.301	p53 CDE Neutral		CTSG	GCGCGCAGTGATGTGTTGCT	16	58.5356	p53 CDE Neutral		CTSG	GCGCGCAGTGATGTGTTGCT	0	0	p53 CDE Neutral
CTSG	GGGAACAGATACACTCCGAG	35	179.414	p53 CDE Neutral		CTSG	GGGAACAGATACACTCCGAG	50	191.774	p53 CDE Neutral		CTSG	GGGAACAGATACACTCCGAG	61	170.29	p53 CDE Neutral		CTSG	GGGAACAGATACACTCCGAG	31	124.17	p53 CDE Neutral		CTSG	GGGAACAGATACACTCCGAG	75	203.326	p53 CDE Neutral		CTSG	GGGAACAGATACACTCCGAG	61	354.208	p53 CDE Neutral		CTSG	GGGAACAGATACACTCCGAG	19	69.511	p53 CDE Neutral		CTSG	GGGAACAGATACACTCCGAG	15	47.114	p53 CDE Neutral
CTSG	TCCGCTGATTATATTGAGGG	84	430.593	p53 CDE Neutral		CTSG	TCCGCTGATTATATTGAGGG	127	487.107	p53 CDE Neutral		CTSG	TCCGCTGATTATATTGAGGG	295	823.535	p53 CDE Neutral		CTSG	TCCGCTGATTATATTGAGGG	186	745.019	p53 CDE Neutral		CTSG	TCCGCTGATTATATTGAGGG	142	384.965	p53 CDE Neutral		CTSG	TCCGCTGATTATATTGAGGG	49	284.528	p53 CDE Neutral		CTSG	TCCGCTGATTATATTGAGGG	43	157.314	p53 CDE Neutral		CTSG	TCCGCTGATTATATTGAGGG	41	128.778	p53 CDE Neutral
CX3CR1	AAAGCCGATGAAGAAGAAGG	22	112.774	p53 CDE Neg		CX3CR1	AAAGCCGATGAAGAAGAAGG	58	222.458	p53 CDE Neg		CX3CR1	AAAGCCGATGAAGAAGAAGG	44	122.832	p53 CDE Neg		CX3CR1	AAAGCCGATGAAGAAGAAGG	41	164.225	p53 CDE Neg		CX3CR1	AAAGCCGATGAAGAAGAAGG	51	138.262	p53 CDE Neg		CX3CR1	AAAGCCGATGAAGAAGAAGG	19	110.327	p53 CDE Neg		CX3CR1	AAAGCCGATGAAGAAGAAGG	0	0	p53 CDE Neg		CX3CR1	AAAGCCGATGAAGAAGAAGG	27	84.8051	p53 CDE Neg
CX3CR1	AGAGCTCTCTGGCTTCTGGG	58	297.314	p53 CDE Neg		CX3CR1	AGAGCTCTCTGGCTTCTGGG	64	245.471	p53 CDE Neg		CX3CR1	AGAGCTCTCTGGCTTCTGGG	129	360.122	p53 CDE Neg		CX3CR1	AGAGCTCTCTGGCTTCTGGG	85	340.466	p53 CDE Neg		CX3CR1	AGAGCTCTCTGGCTTCTGGG	43	116.574	p53 CDE Neg		CX3CR1	AGAGCTCTCTGGCTTCTGGG	57	330.982	p53 CDE Neg		CX3CR1	AGAGCTCTCTGGCTTCTGGG	90	329.263	p53 CDE Neg		CX3CR1	AGAGCTCTCTGGCTTCTGGG	34	106.792	p53 CDE Neg
CX3CR1	ATGCCTTGGTGACTACCCCG	8	41.0088	p53 CDE Neg		CX3CR1	ATGCCTTGGTGACTACCCCG	24	92.0517	p53 CDE Neg		CX3CR1	ATGCCTTGGTGACTACCCCG	15	41.8746	p53 CDE Neg		CX3CR1	ATGCCTTGGTGACTACCCCG	5	20.0274	p53 CDE Neg		CX3CR1	ATGCCTTGGTGACTACCCCG	65	176.216	p53 CDE Neg		CX3CR1	ATGCCTTGGTGACTACCCCG	23	133.554	p53 CDE Neg		CX3CR1	ATGCCTTGGTGACTACCCCG	26	95.1203	p53 CDE Neg		CX3CR1	ATGCCTTGGTGACTACCCCG	21	65.9595	p53 CDE Neg
CX3CR1	GCACGGGCCAGATTTCCTGG	42	215.296	p53 CDE Neg		CX3CR1	GCACGGGCCAGATTTCCTGG	73	279.991	p53 CDE Neg		CX3CR1	GCACGGGCCAGATTTCCTGG	105	293.123	p53 CDE Neg		CX3CR1	GCACGGGCCAGATTTCCTGG	132	528.723	p53 CDE Neg		CX3CR1	GCACGGGCCAGATTTCCTGG	123	333.455	p53 CDE Neg		CX3CR1	GCACGGGCCAGATTTCCTGG	32	185.814	p53 CDE Neg		CX3CR1	GCACGGGCCAGATTTCCTGG	15	54.8771	p53 CDE Neg		CX3CR1	GCACGGGCCAGATTTCCTGG	67	210.442	p53 CDE Neg
CX3CR1	GGAGAAGCTGCTGCAGCCAG	25	128.153	p53 CDE Neg		CX3CR1	GGAGAAGCTGCTGCAGCCAG	70	268.484	p53 CDE Neg		CX3CR1	GGAGAAGCTGCTGCAGCCAG	38	106.082	p53 CDE Neg		CX3CR1	GGAGAAGCTGCTGCAGCCAG	51	204.279	p53 CDE Neg		CX3CR1	GGAGAAGCTGCTGCAGCCAG	66	178.927	p53 CDE Neg		CX3CR1	GGAGAAGCTGCTGCAGCCAG	17	98.7138	p53 CDE Neg		CX3CR1	GGAGAAGCTGCTGCAGCCAG	31	113.413	p53 CDE Neg		CX3CR1	GGAGAAGCTGCTGCAGCCAG	55	172.751	p53 CDE Neg
CX3CR1	GGAGAGCCTGAAGCAGCGCG	16	82.0176	p53 CDE Neg		CX3CR1	GGAGAGCCTGAAGCAGCGCG	35	134.242	p53 CDE Neg		CX3CR1	GGAGAGCCTGAAGCAGCGCG	43	120.041	p53 CDE Neg		CX3CR1	GGAGAGCCTGAAGCAGCGCG	44	176.241	p53 CDE Neg		CX3CR1	GGAGAGCCTGAAGCAGCGCG	47	127.418	p53 CDE Neg		CX3CR1	GGAGAGCCTGAAGCAGCGCG	17	98.7138	p53 CDE Neg		CX3CR1	GGAGAGCCTGAAGCAGCGCG	27	98.7788	p53 CDE Neg		CX3CR1	GGAGAGCCTGAAGCAGCGCG	22	69.1005	p53 CDE Neg
CX3CR1	GTGGAGAGCCTGAAGCAGCG	23	117.9	p53 CDE Neg		CX3CR1	GTGGAGAGCCTGAAGCAGCG	27	103.558	p53 CDE Neg		CX3CR1	GTGGAGAGCCTGAAGCAGCG	65	181.457	p53 CDE Neg		CX3CR1	GTGGAGAGCCTGAAGCAGCG	3	12.0164	p53 CDE Neg		CX3CR1	GTGGAGAGCCTGAAGCAGCG	45	121.996	p53 CDE Neg		CX3CR1	GTGGAGAGCCTGAAGCAGCG	37	214.848	p53 CDE Neg		CX3CR1	GTGGAGAGCCTGAAGCAGCG	5	18.2924	p53 CDE Neg		CX3CR1	GTGGAGAGCCTGAAGCAGCG	0	0	p53 CDE Neg
CX3CR1	TCAACTTCACCCAGCAGCAG	69	353.701	p53 CDE Neg		CX3CR1	TCAACTTCACCCAGCAGCAG	86	329.852	p53 CDE Neg		CX3CR1	TCAACTTCACCCAGCAGCAG	133	371.289	p53 CDE Neg		CX3CR1	TCAACTTCACCCAGCAGCAG	59	236.323	p53 CDE Neg		CX3CR1	TCAACTTCACCCAGCAGCAG	113	306.345	p53 CDE Neg		CX3CR1	TCAACTTCACCCAGCAGCAG	62	360.015	p53 CDE Neg		CX3CR1	TCAACTTCACCCAGCAGCAG	219	801.206	p53 CDE Neg		CX3CR1	TCAACTTCACCCAGCAGCAG	314	986.252	p53 CDE Neg
CX3CR1	TCTGGCTTCTGGGTGGAGAA	73	374.205	p53 CDE Neg		CX3CR1	TCTGGCTTCTGGGTGGAGAA	88	337.523	p53 CDE Neg		CX3CR1	TCTGGCTTCTGGGTGGAGAA	203	566.704	p53 CDE Neg		CX3CR1	TCTGGCTTCTGGGTGGAGAA	184	737.008	p53 CDE Neg		CX3CR1	TCTGGCTTCTGGGTGGAGAA	63	170.794	p53 CDE Neg		CX3CR1	TCTGGCTTCTGGGTGGAGAA	49	284.528	p53 CDE Neg		CX3CR1	TCTGGCTTCTGGGTGGAGAA	23	84.1449	p53 CDE Neg		CX3CR1	TCTGGCTTCTGGGTGGAGAA	8	25.1274	p53 CDE Neg
CX3CR1	TCTGGGTGGAGAATGGCCAG	21	107.648	p53 CDE Neg		CX3CR1	TCTGGGTGGAGAATGGCCAG	17	65.2033	p53 CDE Neg		CX3CR1	TCTGGGTGGAGAATGGCCAG	45	125.624	p53 CDE Neg		CX3CR1	TCTGGGTGGAGAATGGCCAG	15	60.0822	p53 CDE Neg		CX3CR1	TCTGGGTGGAGAATGGCCAG	32	86.7526	p53 CDE Neg		CX3CR1	TCTGGGTGGAGAATGGCCAG	12	69.6803	p53 CDE Neg		CX3CR1	TCTGGGTGGAGAATGGCCAG	36	131.705	p53 CDE Neg		CX3CR1	TCTGGGTGGAGAATGGCCAG	39	122.496	p53 CDE Neg
CYP26B1	ACCACCTCGTGAGCACCGAG	83	425.466	p53 CDE Neutral		CYP26B1	ACCACCTCGTGAGCACCGAG	93	356.7	p53 CDE Neutral		CYP26B1	ACCACCTCGTGAGCACCGAG	215	600.203	p53 CDE Neutral		CYP26B1	ACCACCTCGTGAGCACCGAG	76	304.416	p53 CDE Neutral		CYP26B1	ACCACCTCGTGAGCACCGAG	136	368.699	p53 CDE Neutral		CYP26B1	ACCACCTCGTGAGCACCGAG	75	435.502	p53 CDE Neutral		CYP26B1	ACCACCTCGTGAGCACCGAG	36	131.705	p53 CDE Neutral		CYP26B1	ACCACCTCGTGAGCACCGAG	74	232.429	p53 CDE Neutral
CYP26B1	ACTGCTGGTAGACCTCAAAG	25	128.153	p53 CDE Neutral		CYP26B1	ACTGCTGGTAGACCTCAAAG	35	134.242	p53 CDE Neutral		CYP26B1	ACTGCTGGTAGACCTCAAAG	36	100.499	p53 CDE Neutral		CYP26B1	ACTGCTGGTAGACCTCAAAG	57	228.312	p53 CDE Neutral		CYP26B1	ACTGCTGGTAGACCTCAAAG	40	108.441	p53 CDE Neutral		CYP26B1	ACTGCTGGTAGACCTCAAAG	18	104.521	p53 CDE Neutral		CYP26B1	ACTGCTGGTAGACCTCAAAG	7	25.6093	p53 CDE Neutral		CYP26B1	ACTGCTGGTAGACCTCAAAG	0	0	p53 CDE Neutral
CYP26B1	CTGTTCACGCCCATTTCCGG	18	92.2698	p53 CDE Neutral		CYP26B1	CTGTTCACGCCCATTTCCGG	37	141.913	p53 CDE Neutral		CYP26B1	CTGTTCACGCCCATTTCCGG	43	120.041	p53 CDE Neutral		CYP26B1	CTGTTCACGCCCATTTCCGG	57	228.312	p53 CDE Neutral		CYP26B1	CTGTTCACGCCCATTTCCGG	51	138.262	p53 CDE Neutral		CYP26B1	CTGTTCACGCCCATTTCCGG	34	197.428	p53 CDE Neutral		CYP26B1	CTGTTCACGCCCATTTCCGG	0	0	p53 CDE Neutral		CYP26B1	CTGTTCACGCCCATTTCCGG	4	12.5637	p53 CDE Neutral
CYP26B1	GCAGAAGCTGACCTTCCGCA	62	317.818	p53 CDE Neutral		CYP26B1	GCAGAAGCTGACCTTCCGCA	75	287.662	p53 CDE Neutral		CYP26B1	GCAGAAGCTGACCTTCCGCA	93	259.623	p53 CDE Neutral		CYP26B1	GCAGAAGCTGACCTTCCGCA	72	288.395	p53 CDE Neutral		CYP26B1	GCAGAAGCTGACCTTCCGCA	94	254.836	p53 CDE Neutral		CYP26B1	GCAGAAGCTGACCTTCCGCA	81	470.342	p53 CDE Neutral		CYP26B1	GCAGAAGCTGACCTTCCGCA	98	358.53	p53 CDE Neutral		CYP26B1	GCAGAAGCTGACCTTCCGCA	79	248.134	p53 CDE Neutral
CYP26B1	GCTCATGGCATCCTGCACAG	99	507.484	p53 CDE Neutral		CYP26B1	GCTCATGGCATCCTGCACAG	131	502.449	p53 CDE Neutral		CYP26B1	GCTCATGGCATCCTGCACAG	136	379.663	p53 CDE Neutral		CYP26B1	GCTCATGGCATCCTGCACAG	79	316.433	p53 CDE Neutral		CYP26B1	GCTCATGGCATCCTGCACAG	175	474.428	p53 CDE Neutral		CYP26B1	GCTCATGGCATCCTGCACAG	64	371.628	p53 CDE Neutral		CYP26B1	GCTCATGGCATCCTGCACAG	7	25.6093	p53 CDE Neutral		CYP26B1	GCTCATGGCATCCTGCACAG	15	47.114	p53 CDE Neutral
CYP26B1	GCTCTCAATGAGGAGGTCCA	20	102.522	p53 CDE Neutral		CYP26B1	GCTCTCAATGAGGAGGTCCA	7	26.8484	p53 CDE Neutral		CYP26B1	GCTCTCAATGAGGAGGTCCA	117	326.622	p53 CDE Neutral		CYP26B1	GCTCTCAATGAGGAGGTCCA	59	236.323	p53 CDE Neutral		CYP26B1	GCTCTCAATGAGGAGGTCCA	29	78.6195	p53 CDE Neutral		CYP26B1	GCTCTCAATGAGGAGGTCCA	25	145.167	p53 CDE Neutral		CYP26B1	GCTCTCAATGAGGAGGTCCA	2	7.31695	p53 CDE Neutral		CYP26B1	GCTCTCAATGAGGAGGTCCA	10	31.4093	p53 CDE Neutral
CYP26B1	GCTGATACGCGTGACCGGCG	68	348.575	p53 CDE Neutral		CYP26B1	GCTGATACGCGTGACCGGCG	51	195.61	p53 CDE Neutral		CYP26B1	GCTGATACGCGTGACCGGCG	247	689.536	p53 CDE Neutral		CYP26B1	GCTGATACGCGTGACCGGCG	265	1061.45	p53 CDE Neutral		CYP26B1	GCTGATACGCGTGACCGGCG	98	265.68	p53 CDE Neutral		CYP26B1	GCTGATACGCGTGACCGGCG	40	232.268	p53 CDE Neutral		CYP26B1	GCTGATACGCGTGACCGGCG	18	65.8525	p53 CDE Neutral		CYP26B1	GCTGATACGCGTGACCGGCG	45	141.342	p53 CDE Neutral
CYP26B1	GGCCATCAACGTGTACCAGG	78	399.836	p53 CDE Neutral		CYP26B1	GGCCATCAACGTGTACCAGG	61	233.965	p53 CDE Neutral		CYP26B1	GGCCATCAACGTGTACCAGG	138	385.247	p53 CDE Neutral		CYP26B1	GGCCATCAACGTGTACCAGG	73	292.4	p53 CDE Neutral		CYP26B1	GGCCATCAACGTGTACCAGG	133	360.566	p53 CDE Neutral		CYP26B1	GGCCATCAACGTGTACCAGG	69	400.662	p53 CDE Neutral		CYP26B1	GGCCATCAACGTGTACCAGG	41	149.997	p53 CDE Neutral		CYP26B1	GGCCATCAACGTGTACCAGG	39	122.496	p53 CDE Neutral
CYP26B1	GTTCTGGCTTCCAGTCGTCG	57	292.188	p53 CDE Neutral		CYP26B1	GTTCTGGCTTCCAGTCGTCG	91	349.029	p53 CDE Neutral		CYP26B1	GTTCTGGCTTCCAGTCGTCG	98	273.581	p53 CDE Neutral		CYP26B1	GTTCTGGCTTCCAGTCGTCG	117	468.641	p53 CDE Neutral		CYP26B1	GTTCTGGCTTCCAGTCGTCG	101	273.813	p53 CDE Neutral		CYP26B1	GTTCTGGCTTCCAGTCGTCG	60	348.402	p53 CDE Neutral		CYP26B1	GTTCTGGCTTCCAGTCGTCG	33	120.73	p53 CDE Neutral		CYP26B1	GTTCTGGCTTCCAGTCGTCG	34	106.792	p53 CDE Neutral
CYP26B1	TTACCTGCCCAAGATCCAGC	88	451.097	p53 CDE Neutral		CYP26B1	TTACCTGCCCAAGATCCAGC	67	256.978	p53 CDE Neutral		CYP26B1	TTACCTGCCCAAGATCCAGC	131	365.705	p53 CDE Neutral		CYP26B1	TTACCTGCCCAAGATCCAGC	68	272.373	p53 CDE Neutral		CYP26B1	TTACCTGCCCAAGATCCAGC	123	333.455	p53 CDE Neutral		CYP26B1	TTACCTGCCCAAGATCCAGC	67	389.049	p53 CDE Neutral		CYP26B1	TTACCTGCCCAAGATCCAGC	18	65.8525	p53 CDE Neutral		CYP26B1	TTACCTGCCCAAGATCCAGC	4	12.5637	p53 CDE Neutral
CYP27C1	GATGGCGCCTGCATACATGG	74	379.332	p53 CDE Neg		CYP27C1	GATGGCGCCTGCATACATGG	146	559.981	p53 CDE Neg		CYP27C1	GATGGCGCCTGCATACATGG	245	683.953	p53 CDE Neg		CYP27C1	GATGGCGCCTGCATACATGG	261	1045.43	p53 CDE Neg		CYP27C1	GATGGCGCCTGCATACATGG	193	523.227	p53 CDE Neg		CYP27C1	GATGGCGCCTGCATACATGG	59	342.595	p53 CDE Neg		CYP27C1	GATGGCGCCTGCATACATGG	272	995.105	p53 CDE Neg		CYP27C1	GATGGCGCCTGCATACATGG	364	1143.3	p53 CDE Neg
CYP27C1	CAGACTCACCGTGTCGACGC	7	35.8827	p53 CDE Neg		CYP27C1	CAGACTCACCGTGTCGACGC	33	126.571	p53 CDE Neg		CYP27C1	CAGACTCACCGTGTCGACGC	13	36.2914	p53 CDE Neg		CYP27C1	CAGACTCACCGTGTCGACGC	9	36.0493	p53 CDE Neg		CYP27C1	CAGACTCACCGTGTCGACGC	20	54.2204	p53 CDE Neg		CYP27C1	CAGACTCACCGTGTCGACGC	8	46.4536	p53 CDE Neg		CYP27C1	CAGACTCACCGTGTCGACGC	0	0	p53 CDE Neg		CYP27C1	CAGACTCACCGTGTCGACGC	0	0	p53 CDE Neg
CYP27C1	CAGCAGCATCTCAGTCACGT	3	15.3783	p53 CDE Neg		CYP27C1	CAGCAGCATCTCAGTCACGT	7	26.8484	p53 CDE Neg		CYP27C1	CAGCAGCATCTCAGTCACGT	95	265.206	p53 CDE Neg		CYP27C1	CAGCAGCATCTCAGTCACGT	86	344.471	p53 CDE Neg		CYP27C1	CAGCAGCATCTCAGTCACGT	2	5.42204	p53 CDE Neg		CYP27C1	CAGCAGCATCTCAGTCACGT	4	23.2268	p53 CDE Neg		CYP27C1	CAGCAGCATCTCAGTCACGT	0	0	p53 CDE Neg		CYP27C1	CAGCAGCATCTCAGTCACGT	0	0	p53 CDE Neg
CYP27C1	CCAAATGGACCGAGGCCGGA	50	256.305	p53 CDE Neg		CYP27C1	CCAAATGGACCGAGGCCGGA	82	314.51	p53 CDE Neg		CYP27C1	CCAAATGGACCGAGGCCGGA	77	214.957	p53 CDE Neg		CYP27C1	CCAAATGGACCGAGGCCGGA	118	472.647	p53 CDE Neg		CYP27C1	CCAAATGGACCGAGGCCGGA	123	333.455	p53 CDE Neg		CYP27C1	CCAAATGGACCGAGGCCGGA	73	423.889	p53 CDE Neg		CYP27C1	CCAAATGGACCGAGGCCGGA	56	204.875	p53 CDE Neg		CYP27C1	CCAAATGGACCGAGGCCGGA	87	273.261	p53 CDE Neg
CYP27C1	CAAATATTCAATGGAAGGTG	48	246.053	p53 CDE Neg		CYP27C1	CAAATATTCAATGGAAGGTG	81	310.675	p53 CDE Neg		CYP27C1	CAAATATTCAATGGAAGGTG	61	170.29	p53 CDE Neg		CYP27C1	CAAATATTCAATGGAAGGTG	48	192.263	p53 CDE Neg		CYP27C1	CAAATATTCAATGGAAGGTG	63	170.794	p53 CDE Neg		CYP27C1	CAAATATTCAATGGAAGGTG	50	290.335	p53 CDE Neg		CYP27C1	CAAATATTCAATGGAAGGTG	13	47.5602	p53 CDE Neg		CYP27C1	CAAATATTCAATGGAAGGTG	26	81.6642	p53 CDE Neg
CYP27C1	ATGTATTCCACAGTCAGCTG	10	51.261	p53 CDE Neg		CYP27C1	ATGTATTCCACAGTCAGCTG	35	134.242	p53 CDE Neg		CYP27C1	ATGTATTCCACAGTCAGCTG	77	214.957	p53 CDE Neg		CYP27C1	ATGTATTCCACAGTCAGCTG	90	360.493	p53 CDE Neg		CYP27C1	ATGTATTCCACAGTCAGCTG	45	121.996	p53 CDE Neg		CYP27C1	ATGTATTCCACAGTCAGCTG	15	87.1004	p53 CDE Neg		CYP27C1	ATGTATTCCACAGTCAGCTG	2	7.31695	p53 CDE Neg		CYP27C1	ATGTATTCCACAGTCAGCTG	20	62.8186	p53 CDE Neg
CYP27C1	GGAGATTGTGAAGAATTTAG	64	328.071	p53 CDE Neg		CYP27C1	GGAGATTGTGAAGAATTTAG	41	157.255	p53 CDE Neg		CYP27C1	GGAGATTGTGAAGAATTTAG	27	75.3744	p53 CDE Neg		CYP27C1	GGAGATTGTGAAGAATTTAG	39	156.214	p53 CDE Neg		CYP27C1	GGAGATTGTGAAGAATTTAG	94	254.836	p53 CDE Neg		CYP27C1	GGAGATTGTGAAGAATTTAG	59	342.595	p53 CDE Neg		CYP27C1	GGAGATTGTGAAGAATTTAG	27	98.7788	p53 CDE Neg		CYP27C1	GGAGATTGTGAAGAATTTAG	52	163.328	p53 CDE Neg
CYP27C1	GAATTTGAAGAGTCCATCCC	23	117.9	p53 CDE Neg		CYP27C1	GAATTTGAAGAGTCCATCCC	25	95.8872	p53 CDE Neg		CYP27C1	GAATTTGAAGAGTCCATCCC	8	22.3331	p53 CDE Neg		CYP27C1	GAATTTGAAGAGTCCATCCC	32	128.175	p53 CDE Neg		CYP27C1	GAATTTGAAGAGTCCATCCC	39	105.73	p53 CDE Neg		CYP27C1	GAATTTGAAGAGTCCATCCC	41	238.074	p53 CDE Neg		CYP27C1	GAATTTGAAGAGTCCATCCC	18	65.8525	p53 CDE Neg		CYP27C1	GAATTTGAAGAGTCCATCCC	1	3.14093	p53 CDE Neg
CYP27C1	TAATTAAGTCAGCAATAACT	121	620.258	p53 CDE Neg		CYP27C1	TAATTAAGTCAGCAATAACT	101	387.384	p53 CDE Neg		CYP27C1	TAATTAAGTCAGCAATAACT	258	720.244	p53 CDE Neg		CYP27C1	TAATTAAGTCAGCAATAACT	166	664.91	p53 CDE Neg		CYP27C1	TAATTAAGTCAGCAATAACT	194	525.938	p53 CDE Neg		CYP27C1	TAATTAAGTCAGCAATAACT	80	464.536	p53 CDE Neg		CYP27C1	TAATTAAGTCAGCAATAACT	119	435.358	p53 CDE Neg		CYP27C1	TAATTAAGTCAGCAATAACT	274	860.615	p53 CDE Neg
CYP27C1	CTCTCCTTAAGGAAACCCTG	23	117.9	p53 CDE Neg		CYP27C1	CTCTCCTTAAGGAAACCCTG	52	199.445	p53 CDE Neg		CYP27C1	CTCTCCTTAAGGAAACCCTG	29	80.9576	p53 CDE Neg		CYP27C1	CTCTCCTTAAGGAAACCCTG	54	216.296	p53 CDE Neg		CYP27C1	CTCTCCTTAAGGAAACCCTG	67	181.638	p53 CDE Neg		CYP27C1	CTCTCCTTAAGGAAACCCTG	14	81.2937	p53 CDE Neg		CYP27C1	CTCTCCTTAAGGAAACCCTG	0	0	p53 CDE Neg		CYP27C1	CTCTCCTTAAGGAAACCCTG	0	0	p53 CDE Neg
CYP2A13	AAAACCCCTTAGGGTGGCGA	52	266.557	p53 CDE Pos		CYP2A13	AAAACCCCTTAGGGTGGCGA	42	161.091	p53 CDE Pos		CYP2A13	AAAACCCCTTAGGGTGGCGA	63	175.874	p53 CDE Pos		CYP2A13	AAAACCCCTTAGGGTGGCGA	21	84.1151	p53 CDE Pos		CYP2A13	AAAACCCCTTAGGGTGGCGA	71	192.482	p53 CDE Pos		CYP2A13	AAAACCCCTTAGGGTGGCGA	30	174.201	p53 CDE Pos		CYP2A13	AAAACCCCTTAGGGTGGCGA	28	102.437	p53 CDE Pos		CYP2A13	AAAACCCCTTAGGGTGGCGA	11	34.5502	p53 CDE Pos
CYP2A13	ACCACAGCAACAGGCCTTTA	72	369.079	p53 CDE Pos		CYP2A13	ACCACAGCAACAGGCCTTTA	105	402.726	p53 CDE Pos		CYP2A13	ACCACAGCAACAGGCCTTTA	156	435.496	p53 CDE Pos		CYP2A13	ACCACAGCAACAGGCCTTTA	88	352.482	p53 CDE Pos		CYP2A13	ACCACAGCAACAGGCCTTTA	166	450.029	p53 CDE Pos		CYP2A13	ACCACAGCAACAGGCCTTTA	64	371.628	p53 CDE Pos		CYP2A13	ACCACAGCAACAGGCCTTTA	58	212.191	p53 CDE Pos		CYP2A13	ACCACAGCAACAGGCCTTTA	69	216.724	p53 CDE Pos
CYP2A13	AGTTCACGGCAACCTCCACG	6	30.7566	p53 CDE Pos		CYP2A13	AGTTCACGGCAACCTCCACG	26	99.7227	p53 CDE Pos		CYP2A13	AGTTCACGGCAACCTCCACG	0	0	p53 CDE Pos		CYP2A13	AGTTCACGGCAACCTCCACG	2	8.01096	p53 CDE Pos		CYP2A13	AGTTCACGGCAACCTCCACG	35	94.8857	p53 CDE Pos		CYP2A13	AGTTCACGGCAACCTCCACG	21	121.941	p53 CDE Pos		CYP2A13	AGTTCACGGCAACCTCCACG	0	0	p53 CDE Pos		CYP2A13	AGTTCACGGCAACCTCCACG	0	0	p53 CDE Pos
CYP2A13	CACGCCAAAACCCCTTAGGG	18	92.2698	p53 CDE Pos		CYP2A13	CACGCCAAAACCCCTTAGGG	25	95.8872	p53 CDE Pos		CYP2A13	CACGCCAAAACCCCTTAGGG	19	53.0412	p53 CDE Pos		CYP2A13	CACGCCAAAACCCCTTAGGG	17	68.0932	p53 CDE Pos		CYP2A13	CACGCCAAAACCCCTTAGGG	43	116.574	p53 CDE Pos		CYP2A13	CACGCCAAAACCCCTTAGGG	17	98.7138	p53 CDE Pos		CYP2A13	CACGCCAAAACCCCTTAGGG	29	106.096	p53 CDE Pos		CYP2A13	CACGCCAAAACCCCTTAGGG	47	147.624	p53 CDE Pos
CYP2A13	CATCGAGGAACGCATCCAGG	41	210.17	p53 CDE Pos		CYP2A13	CATCGAGGAACGCATCCAGG	39	149.584	p53 CDE Pos		CYP2A13	CATCGAGGAACGCATCCAGG	64	178.665	p53 CDE Pos		CYP2A13	CATCGAGGAACGCATCCAGG	15	60.0822	p53 CDE Pos		CYP2A13	CATCGAGGAACGCATCCAGG	32	86.7526	p53 CDE Pos		CYP2A13	CATCGAGGAACGCATCCAGG	47	272.915	p53 CDE Pos		CYP2A13	CATCGAGGAACGCATCCAGG	0	0	p53 CDE Pos		CYP2A13	CATCGAGGAACGCATCCAGG	6	18.8456	p53 CDE Pos
CYP2A13	GCCTTAGGACACCTTCATGA	24	123.026	p53 CDE Pos		CYP2A13	GCCTTAGGACACCTTCATGA	29	111.229	p53 CDE Pos		CYP2A13	GCCTTAGGACACCTTCATGA	39	108.874	p53 CDE Pos		CYP2A13	GCCTTAGGACACCTTCATGA	2	8.01096	p53 CDE Pos		CYP2A13	GCCTTAGGACACCTTCATGA	45	121.996	p53 CDE Pos		CYP2A13	GCCTTAGGACACCTTCATGA	18	104.521	p53 CDE Pos		CYP2A13	GCCTTAGGACACCTTCATGA	2	7.31695	p53 CDE Pos		CYP2A13	GCCTTAGGACACCTTCATGA	0	0	p53 CDE Pos
CYP2A13	GCTGGGAAGCTTCCAGTTCA	18	92.2698	p53 CDE Pos		CYP2A13	GCTGGGAAGCTTCCAGTTCA	31	118.9	p53 CDE Pos		CYP2A13	GCTGGGAAGCTTCCAGTTCA	93	259.623	p53 CDE Pos		CYP2A13	GCTGGGAAGCTTCCAGTTCA	59	236.323	p53 CDE Pos		CYP2A13	GCTGGGAAGCTTCCAGTTCA	33	89.4636	p53 CDE Pos		CYP2A13	GCTGGGAAGCTTCCAGTTCA	20	116.134	p53 CDE Pos		CYP2A13	GCTGGGAAGCTTCCAGTTCA	0	0	p53 CDE Pos		CYP2A13	GCTGGGAAGCTTCCAGTTCA	0	0	p53 CDE Pos
CYP2A13	GGTTTTGGCGTGGGCAAGCG	0	0	p53 CDE Pos		CYP2A13	GGTTTTGGCGTGGGCAAGCG	0	0	p53 CDE Pos		CYP2A13	GGTTTTGGCGTGGGCAAGCG	0	0	p53 CDE Pos		CYP2A13	GGTTTTGGCGTGGGCAAGCG	0	0	p53 CDE Pos		CYP2A13	GGTTTTGGCGTGGGCAAGCG	0	0	p53 CDE Pos		CYP2A13	GGTTTTGGCGTGGGCAAGCG	0	0	p53 CDE Pos		CYP2A13	GGTTTTGGCGTGGGCAAGCG	0	0	p53 CDE Pos		CYP2A13	GGTTTTGGCGTGGGCAAGCG	0	0	p53 CDE Pos
CYP2A13	GTTCAGCGGGCGAGGCGAGC	6	30.7566	p53 CDE Pos		CYP2A13	GTTCAGCGGGCGAGGCGAGC	35	134.242	p53 CDE Pos		CYP2A13	GTTCAGCGGGCGAGGCGAGC	13	36.2914	p53 CDE Pos		CYP2A13	GTTCAGCGGGCGAGGCGAGC	30	120.164	p53 CDE Pos		CYP2A13	GTTCAGCGGGCGAGGCGAGC	46	124.707	p53 CDE Pos		CYP2A13	GTTCAGCGGGCGAGGCGAGC	16	92.9071	p53 CDE Pos		CYP2A13	GTTCAGCGGGCGAGGCGAGC	111	406.091	p53 CDE Pos		CYP2A13	GTTCAGCGGGCGAGGCGAGC	6	18.8456	p53 CDE Pos
CYP2A13	TGGTCTTGATGTCAGTCTGG	41	210.17	p53 CDE Pos		CYP2A13	TGGTCTTGATGTCAGTCTGG	70	268.484	p53 CDE Pos		CYP2A13	TGGTCTTGATGTCAGTCTGG	48	133.999	p53 CDE Pos		CYP2A13	TGGTCTTGATGTCAGTCTGG	74	296.405	p53 CDE Pos		CYP2A13	TGGTCTTGATGTCAGTCTGG	94	254.836	p53 CDE Pos		CYP2A13	TGGTCTTGATGTCAGTCTGG	32	185.814	p53 CDE Pos		CYP2A13	TGGTCTTGATGTCAGTCTGG	2	7.31695	p53 CDE Pos		CYP2A13	TGGTCTTGATGTCAGTCTGG	16	50.2549	p53 CDE Pos
CYP4V2	AACGCCAATGAAGACTGTAG	111	568.997	p53 CDE Neutral		CYP4V2	AACGCCAATGAAGACTGTAG	190	728.743	p53 CDE Neutral		CYP4V2	AACGCCAATGAAGACTGTAG	266	742.577	p53 CDE Neutral		CYP4V2	AACGCCAATGAAGACTGTAG	149	596.816	p53 CDE Neutral		CYP4V2	AACGCCAATGAAGACTGTAG	282	764.507	p53 CDE Neutral		CYP4V2	AACGCCAATGAAGACTGTAG	110	638.736	p53 CDE Neutral		CYP4V2	AACGCCAATGAAGACTGTAG	42	153.656	p53 CDE Neutral		CYP4V2	AACGCCAATGAAGACTGTAG	107	336.08	p53 CDE Neutral
CYP4V2	ACTTAAAAGCAAGTCAAGAA	20	102.522	p53 CDE Neutral		CYP4V2	ACTTAAAAGCAAGTCAAGAA	54	207.116	p53 CDE Neutral		CYP4V2	ACTTAAAAGCAAGTCAAGAA	94	262.414	p53 CDE Neutral		CYP4V2	ACTTAAAAGCAAGTCAAGAA	20	80.1096	p53 CDE Neutral		CYP4V2	ACTTAAAAGCAAGTCAAGAA	62	168.083	p53 CDE Neutral		CYP4V2	ACTTAAAAGCAAGTCAAGAA	17	98.7138	p53 CDE Neutral		CYP4V2	ACTTAAAAGCAAGTCAAGAA	7	25.6093	p53 CDE Neutral		CYP4V2	ACTTAAAAGCAAGTCAAGAA	5	15.7047	p53 CDE Neutral
CYP4V2	ATAAACTGCACGGACATACT	48	246.053	p53 CDE Neutral		CYP4V2	ATAAACTGCACGGACATACT	70	268.484	p53 CDE Neutral		CYP4V2	ATAAACTGCACGGACATACT	230	642.078	p53 CDE Neutral		CYP4V2	ATAAACTGCACGGACATACT	54	216.296	p53 CDE Neutral		CYP4V2	ATAAACTGCACGGACATACT	125	338.877	p53 CDE Neutral		CYP4V2	ATAAACTGCACGGACATACT	33	191.621	p53 CDE Neutral		CYP4V2	ATAAACTGCACGGACATACT	1	3.65847	p53 CDE Neutral		CYP4V2	ATAAACTGCACGGACATACT	34	106.792	p53 CDE Neutral
CYP4V2	ATCTAAGAAATCTTCCAGAA	69	353.701	p53 CDE Neutral		CYP4V2	ATCTAAGAAATCTTCCAGAA	169	648.198	p53 CDE Neutral		CYP4V2	ATCTAAGAAATCTTCCAGAA	317	884.951	p53 CDE Neutral		CYP4V2	ATCTAAGAAATCTTCCAGAA	250	1001.37	p53 CDE Neutral		CYP4V2	ATCTAAGAAATCTTCCAGAA	205	555.759	p53 CDE Neutral		CYP4V2	ATCTAAGAAATCTTCCAGAA	78	452.922	p53 CDE Neutral		CYP4V2	ATCTAAGAAATCTTCCAGAA	17	62.1941	p53 CDE Neutral		CYP4V2	ATCTAAGAAATCTTCCAGAA	40	125.637	p53 CDE Neutral
CYP4V2	GCAGATCATTGAGTACACAG	27	138.405	p53 CDE Neutral		CYP4V2	GCAGATCATTGAGTACACAG	52	199.445	p53 CDE Neutral		CYP4V2	GCAGATCATTGAGTACACAG	72	200.998	p53 CDE Neutral		CYP4V2	GCAGATCATTGAGTACACAG	51	204.279	p53 CDE Neutral		CYP4V2	GCAGATCATTGAGTACACAG	93	252.125	p53 CDE Neutral		CYP4V2	GCAGATCATTGAGTACACAG	50	290.335	p53 CDE Neutral		CYP4V2	GCAGATCATTGAGTACACAG	7	25.6093	p53 CDE Neutral		CYP4V2	GCAGATCATTGAGTACACAG	15	47.114	p53 CDE Neutral
CYP4V2	GCAGATGCGGCCCATCCCCA	47	240.927	p53 CDE Neutral		CYP4V2	GCAGATGCGGCCCATCCCCA	75	287.662	p53 CDE Neutral		CYP4V2	GCAGATGCGGCCCATCCCCA	54	150.749	p53 CDE Neutral		CYP4V2	GCAGATGCGGCCCATCCCCA	34	136.186	p53 CDE Neutral		CYP4V2	GCAGATGCGGCCCATCCCCA	96	260.258	p53 CDE Neutral		CYP4V2	GCAGATGCGGCCCATCCCCA	34	197.428	p53 CDE Neutral		CYP4V2	GCAGATGCGGCCCATCCCCA	0	0	p53 CDE Neutral		CYP4V2	GCAGATGCGGCCCATCCCCA	1	3.14093	p53 CDE Neutral
CYP4V2	GCAGCGCGTGGCCCACCAGT	56	287.062	p53 CDE Neutral		CYP4V2	GCAGCGCGTGGCCCACCAGT	71	272.32	p53 CDE Neutral		CYP4V2	GCAGCGCGTGGCCCACCAGT	61	170.29	p53 CDE Neutral		CYP4V2	GCAGCGCGTGGCCCACCAGT	55	220.301	p53 CDE Neutral		CYP4V2	GCAGCGCGTGGCCCACCAGT	96	260.258	p53 CDE Neutral		CYP4V2	GCAGCGCGTGGCCCACCAGT	47	272.915	p53 CDE Neutral		CYP4V2	GCAGCGCGTGGCCCACCAGT	138	504.869	p53 CDE Neutral		CYP4V2	GCAGCGCGTGGCCCACCAGT	347	1089.9	p53 CDE Neutral
CYP4V2	TGGTACCTTATGTTTAAAGA	33	169.161	p53 CDE Neutral		CYP4V2	TGGTACCTTATGTTTAAAGA	96	368.207	p53 CDE Neutral		CYP4V2	TGGTACCTTATGTTTAAAGA	50	139.582	p53 CDE Neutral		CYP4V2	TGGTACCTTATGTTTAAAGA	42	168.23	p53 CDE Neutral		CYP4V2	TGGTACCTTATGTTTAAAGA	64	173.505	p53 CDE Neutral		CYP4V2	TGGTACCTTATGTTTAAAGA	73	423.889	p53 CDE Neutral		CYP4V2	TGGTACCTTATGTTTAAAGA	14	51.2186	p53 CDE Neutral		CYP4V2	TGGTACCTTATGTTTAAAGA	0	0	p53 CDE Neutral
CYP4V2	TTAAGTGTGACTGATGACGA	50	256.305	p53 CDE Neutral		CYP4V2	TTAAGTGTGACTGATGACGA	35	134.242	p53 CDE Neutral		CYP4V2	TTAAGTGTGACTGATGACGA	86	240.081	p53 CDE Neutral		CYP4V2	TTAAGTGTGACTGATGACGA	80	320.438	p53 CDE Neutral		CYP4V2	TTAAGTGTGACTGATGACGA	51	138.262	p53 CDE Neutral		CYP4V2	TTAAGTGTGACTGATGACGA	29	168.394	p53 CDE Neutral		CYP4V2	TTAAGTGTGACTGATGACGA	2	7.31695	p53 CDE Neutral		CYP4V2	TTAAGTGTGACTGATGACGA	10	31.4093	p53 CDE Neutral
CYSTM1	ACTGTGGGTATCCTTGGTAG	109	558.745	p53 CDE Neg		CYSTM1	ACTGTGGGTATCCTTGGTAG	87	333.687	p53 CDE Neg		CYSTM1	ACTGTGGGTATCCTTGGTAG	158	441.08	p53 CDE Neg		CYSTM1	ACTGTGGGTATCCTTGGTAG	182	728.997	p53 CDE Neg		CYSTM1	ACTGTGGGTATCCTTGGTAG	178	482.561	p53 CDE Neg		CYSTM1	ACTGTGGGTATCCTTGGTAG	105	609.703	p53 CDE Neg		CYSTM1	ACTGTGGGTATCCTTGGTAG	57	208.533	p53 CDE Neg		CYSTM1	ACTGTGGGTATCCTTGGTAG	171	537.099	p53 CDE Neg
CYSTM1	AGGGTTCTCTTGGTTCATCG	59	302.44	p53 CDE Neg		CYSTM1	AGGGTTCTCTTGGTTCATCG	83	318.346	p53 CDE Neg		CYSTM1	AGGGTTCTCTTGGTTCATCG	124	346.164	p53 CDE Neg		CYSTM1	AGGGTTCTCTTGGTTCATCG	101	404.553	p53 CDE Neg		CYSTM1	AGGGTTCTCTTGGTTCATCG	104	281.946	p53 CDE Neg		CYSTM1	AGGGTTCTCTTGGTTCATCG	29	168.394	p53 CDE Neg		CYSTM1	AGGGTTCTCTTGGTTCATCG	17	62.1941	p53 CDE Neg		CYSTM1	AGGGTTCTCTTGGTTCATCG	24	75.3823	p53 CDE Neg
CYSTM1	ATATCCAGGCCCTGGTCCAA	51	261.431	p53 CDE Neg		CYSTM1	ATATCCAGGCCCTGGTCCAA	106	406.562	p53 CDE Neg		CYSTM1	ATATCCAGGCCCTGGTCCAA	92	256.831	p53 CDE Neg		CYSTM1	ATATCCAGGCCCTGGTCCAA	78	312.427	p53 CDE Neg		CYSTM1	ATATCCAGGCCCTGGTCCAA	161	436.474	p53 CDE Neg		CYSTM1	ATATCCAGGCCCTGGTCCAA	109	632.93	p53 CDE Neg		CYSTM1	ATATCCAGGCCCTGGTCCAA	136	497.552	p53 CDE Neg		CYSTM1	ATATCCAGGCCCTGGTCCAA	254	797.796	p53 CDE Neg
CYSTM1	CCACAGTACGGCTGGCAGGG	39	199.918	p53 CDE Neg		CYSTM1	CCACAGTACGGCTGGCAGGG	107	410.397	p53 CDE Neg		CYSTM1	CCACAGTACGGCTGGCAGGG	112	312.664	p53 CDE Neg		CYSTM1	CCACAGTACGGCTGGCAGGG	62	248.34	p53 CDE Neg		CYSTM1	CCACAGTACGGCTGGCAGGG	152	412.075	p53 CDE Neg		CYSTM1	CCACAGTACGGCTGGCAGGG	37	214.848	p53 CDE Neg		CYSTM1	CCACAGTACGGCTGGCAGGG	147	537.796	p53 CDE Neg		CYSTM1	CCACAGTACGGCTGGCAGGG	387	1215.54	p53 CDE Neg
CYSTM1	CCTTATCCACCACAACCAAT	34	174.287	p53 CDE Neg		CYSTM1	CCTTATCCACCACAACCAAT	59	226.294	p53 CDE Neg		CYSTM1	CCTTATCCACCACAACCAAT	100	279.164	p53 CDE Neg		CYSTM1	CCTTATCCACCACAACCAAT	37	148.203	p53 CDE Neg		CYSTM1	CCTTATCCACCACAACCAAT	57	154.528	p53 CDE Neg		CYSTM1	CCTTATCCACCACAACCAAT	19	110.327	p53 CDE Neg		CYSTM1	CCTTATCCACCACAACCAAT	0	0	p53 CDE Neg		CYSTM1	CCTTATCCACCACAACCAAT	0	0	p53 CDE Neg
CYSTM1	CCTTGGTAGGGGTACCCTTG	90	461.349	p53 CDE Neg		CYSTM1	CCTTGGTAGGGGTACCCTTG	70	268.484	p53 CDE Neg		CYSTM1	CCTTGGTAGGGGTACCCTTG	40	111.666	p53 CDE Neg		CYSTM1	CCTTGGTAGGGGTACCCTTG	40	160.219	p53 CDE Neg		CYSTM1	CCTTGGTAGGGGTACCCTTG	122	330.744	p53 CDE Neg		CYSTM1	CCTTGGTAGGGGTACCCTTG	73	423.889	p53 CDE Neg		CYSTM1	CCTTGGTAGGGGTACCCTTG	139	508.528	p53 CDE Neg		CYSTM1	CCTTGGTAGGGGTACCCTTG	44	138.201	p53 CDE Neg
CYSTM1	CTCTCTGTTGCTGCTGTCTC	35	179.414	p53 CDE Neg		CYSTM1	CTCTCTGTTGCTGCTGTCTC	47	180.268	p53 CDE Neg		CYSTM1	CTCTCTGTTGCTGCTGTCTC	221	616.953	p53 CDE Neg		CYSTM1	CTCTCTGTTGCTGCTGTCTC	102	408.559	p53 CDE Neg		CYSTM1	CTCTCTGTTGCTGCTGTCTC	79	214.17	p53 CDE Neg		CYSTM1	CTCTCTGTTGCTGCTGTCTC	28	162.587	p53 CDE Neg		CYSTM1	CTCTCTGTTGCTGCTGTCTC	28	102.437	p53 CDE Neg		CYSTM1	CTCTCTGTTGCTGCTGTCTC	16	50.2549	p53 CDE Neg
CYSTM1	GACCAAAGAAGAGATGAGCT	72	369.079	p53 CDE Neg		CYSTM1	GACCAAAGAAGAGATGAGCT	114	437.246	p53 CDE Neg		CYSTM1	GACCAAAGAAGAGATGAGCT	365	1018.95	p53 CDE Neg		CYSTM1	GACCAAAGAAGAGATGAGCT	437	1750.39	p53 CDE Neg		CYSTM1	GACCAAAGAAGAGATGAGCT	153	414.786	p53 CDE Neg		CYSTM1	GACCAAAGAAGAGATGAGCT	62	360.015	p53 CDE Neg		CYSTM1	GACCAAAGAAGAGATGAGCT	274	1002.42	p53 CDE Neg		CYSTM1	GACCAAAGAAGAGATGAGCT	90	282.684	p53 CDE Neg
CYSTM1	GACCCTACCCACCTCCTCAA	55	281.936	p53 CDE Neg		CYSTM1	GACCCTACCCACCTCCTCAA	96	368.207	p53 CDE Neg		CYSTM1	GACCCTACCCACCTCCTCAA	88	245.665	p53 CDE Neg		CYSTM1	GACCCTACCCACCTCCTCAA	31	124.17	p53 CDE Neg		CYSTM1	GACCCTACCCACCTCCTCAA	112	303.634	p53 CDE Neg		CYSTM1	GACCCTACCCACCTCCTCAA	49	284.528	p53 CDE Neg		CYSTM1	GACCCTACCCACCTCCTCAA	1780	6512.08	p53 CDE Neg		CYSTM1	GACCCTACCCACCTCCTCAA	1467	4607.74	p53 CDE Neg
CYSTM1	GCAACAGAGAGCCGTCCAGC	13	66.6393	p53 CDE Neg		CYSTM1	GCAACAGAGAGCCGTCCAGC	12	46.0259	p53 CDE Neg		CYSTM1	GCAACAGAGAGCCGTCCAGC	7	19.5415	p53 CDE Neg		CYSTM1	GCAACAGAGAGCCGTCCAGC	3	12.0164	p53 CDE Neg		CYSTM1	GCAACAGAGAGCCGTCCAGC	27	73.1975	p53 CDE Neg		CYSTM1	GCAACAGAGAGCCGTCCAGC	20	116.134	p53 CDE Neg		CYSTM1	GCAACAGAGAGCCGTCCAGC	472	1726.8	p53 CDE Neg		CYSTM1	GCAACAGAGAGCCGTCCAGC	1090	3423.61	p53 CDE Neg
DAPK1	ATATCTGCCTCAAGACCAAG	28	143.531	p53 CDE Neg		DAPK1	ATATCTGCCTCAAGACCAAG	66	253.142	p53 CDE Neg		DAPK1	ATATCTGCCTCAAGACCAAG	87	242.873	p53 CDE Neg		DAPK1	ATATCTGCCTCAAGACCAAG	88	352.482	p53 CDE Neg		DAPK1	ATATCTGCCTCAAGACCAAG	75	203.326	p53 CDE Neg		DAPK1	ATATCTGCCTCAAGACCAAG	24	139.361	p53 CDE Neg		DAPK1	ATATCTGCCTCAAGACCAAG	19	69.511	p53 CDE Neg		DAPK1	ATATCTGCCTCAAGACCAAG	31	97.3688	p53 CDE Neg
DAPK1	CCGGCTCGAACATCATGCTG	58	297.314	p53 CDE Neg		DAPK1	CCGGCTCGAACATCATGCTG	74	283.826	p53 CDE Neg		DAPK1	CCGGCTCGAACATCATGCTG	65	181.457	p53 CDE Neg		DAPK1	CCGGCTCGAACATCATGCTG	56	224.307	p53 CDE Neg		DAPK1	CCGGCTCGAACATCATGCTG	84	227.726	p53 CDE Neg		DAPK1	CCGGCTCGAACATCATGCTG	50	290.335	p53 CDE Neg		DAPK1	CCGGCTCGAACATCATGCTG	12	43.9017	p53 CDE Neg		DAPK1	CCGGCTCGAACATCATGCTG	30	94.2279	p53 CDE Neg
DAPK1	CGAGGTCTATGAGAACAAGA	38	194.792	p53 CDE Neg		DAPK1	CGAGGTCTATGAGAACAAGA	47	180.268	p53 CDE Neg		DAPK1	CGAGGTCTATGAGAACAAGA	48	133.999	p53 CDE Neg		DAPK1	CGAGGTCTATGAGAACAAGA	34	136.186	p53 CDE Neg		DAPK1	CGAGGTCTATGAGAACAAGA	65	176.216	p53 CDE Neg		DAPK1	CGAGGTCTATGAGAACAAGA	28	162.587	p53 CDE Neg		DAPK1	CGAGGTCTATGAGAACAAGA	5	18.2924	p53 CDE Neg		DAPK1	CGAGGTCTATGAGAACAAGA	15	47.114	p53 CDE Neg
DAPK1	CTTCCTCCAGGAAGGCAGCG	50	256.305	p53 CDE Neg		DAPK1	CTTCCTCCAGGAAGGCAGCG	68	260.813	p53 CDE Neg		DAPK1	CTTCCTCCAGGAAGGCAGCG	93	259.623	p53 CDE Neg		DAPK1	CTTCCTCCAGGAAGGCAGCG	34	136.186	p53 CDE Neg		DAPK1	CTTCCTCCAGGAAGGCAGCG	75	203.326	p53 CDE Neg		DAPK1	CTTCCTCCAGGAAGGCAGCG	39	226.461	p53 CDE Neg		DAPK1	CTTCCTCCAGGAAGGCAGCG	15	54.8771	p53 CDE Neg		DAPK1	CTTCCTCCAGGAAGGCAGCG	69	216.724	p53 CDE Neg
DAPK1	GCACAGTGATATCAAGCGAA	29	148.657	p53 CDE Neg		DAPK1	GCACAGTGATATCAAGCGAA	67	256.978	p53 CDE Neg		DAPK1	GCACAGTGATATCAAGCGAA	89	248.456	p53 CDE Neg		DAPK1	GCACAGTGATATCAAGCGAA	20	80.1096	p53 CDE Neg		DAPK1	GCACAGTGATATCAAGCGAA	115	311.767	p53 CDE Neg		DAPK1	GCACAGTGATATCAAGCGAA	40	232.268	p53 CDE Neg		DAPK1	GCACAGTGATATCAAGCGAA	314	1148.76	p53 CDE Neg		DAPK1	GCACAGTGATATCAAGCGAA	329	1033.37	p53 CDE Neg
DAPK1	GTTCTCATAGACCTCGTGCA	48	246.053	p53 CDE Neg		DAPK1	GTTCTCATAGACCTCGTGCA	40	153.42	p53 CDE Neg		DAPK1	GTTCTCATAGACCTCGTGCA	95	265.206	p53 CDE Neg		DAPK1	GTTCTCATAGACCTCGTGCA	42	168.23	p53 CDE Neg		DAPK1	GTTCTCATAGACCTCGTGCA	84	227.726	p53 CDE Neg		DAPK1	GTTCTCATAGACCTCGTGCA	34	197.428	p53 CDE Neg		DAPK1	GTTCTCATAGACCTCGTGCA	28	102.437	p53 CDE Neg		DAPK1	GTTCTCATAGACCTCGTGCA	41	128.778	p53 CDE Neg
DAPK1	TCACACAGGTGAGTCATGGG	154	789.42	p53 CDE Neg		DAPK1	TCACACAGGTGAGTCATGGG	130	498.613	p53 CDE Neg		DAPK1	TCACACAGGTGAGTCATGGG	310	865.409	p53 CDE Neg		DAPK1	TCACACAGGTGAGTCATGGG	124	496.679	p53 CDE Neg		DAPK1	TCACACAGGTGAGTCATGGG	295	799.751	p53 CDE Neg		DAPK1	TCACACAGGTGAGTCATGGG	113	656.157	p53 CDE Neg		DAPK1	TCACACAGGTGAGTCATGGG	27	98.7788	p53 CDE Neg		DAPK1	TCACACAGGTGAGTCATGGG	70	219.865	p53 CDE Neg
DAPK1	TCTCCACGCTGCCTTCCTGG	0	0	p53 CDE Neg		DAPK1	TCTCCACGCTGCCTTCCTGG	0	0	p53 CDE Neg		DAPK1	TCTCCACGCTGCCTTCCTGG	13	36.2914	p53 CDE Neg		DAPK1	TCTCCACGCTGCCTTCCTGG	0	0	p53 CDE Neg		DAPK1	TCTCCACGCTGCCTTCCTGG	0	0	p53 CDE Neg		DAPK1	TCTCCACGCTGCCTTCCTGG	1	5.8067	p53 CDE Neg		DAPK1	TCTCCACGCTGCCTTCCTGG	0	0	p53 CDE Neg		DAPK1	TCTCCACGCTGCCTTCCTGG	0	0	p53 CDE Neg
DAPK1	TCTTACCAAAGGGATGCTGG	50	256.305	p53 CDE Neg		DAPK1	TCTTACCAAAGGGATGCTGG	50	191.774	p53 CDE Neg		DAPK1	TCTTACCAAAGGGATGCTGG	24	66.9994	p53 CDE Neg		DAPK1	TCTTACCAAAGGGATGCTGG	36	144.197	p53 CDE Neg		DAPK1	TCTTACCAAAGGGATGCTGG	74	200.615	p53 CDE Neg		DAPK1	TCTTACCAAAGGGATGCTGG	33	191.621	p53 CDE Neg		DAPK1	TCTTACCAAAGGGATGCTGG	0	0	p53 CDE Neg		DAPK1	TCTTACCAAAGGGATGCTGG	0	0	p53 CDE Neg
DAPK1	TGGTCATCGGCCGAGCAGTG	40	205.044	p53 CDE Neg		DAPK1	TGGTCATCGGCCGAGCAGTG	65	249.307	p53 CDE Neg		DAPK1	TGGTCATCGGCCGAGCAGTG	147	410.372	p53 CDE Neg		DAPK1	TGGTCATCGGCCGAGCAGTG	59	236.323	p53 CDE Neg		DAPK1	TGGTCATCGGCCGAGCAGTG	103	279.235	p53 CDE Neg		DAPK1	TGGTCATCGGCCGAGCAGTG	60	348.402	p53 CDE Neg		DAPK1	TGGTCATCGGCCGAGCAGTG	83	303.653	p53 CDE Neg		DAPK1	TGGTCATCGGCCGAGCAGTG	128	402.039	p53 CDE Neg
DAZAP1	AGGGAATACTTCAAGAAGTT	41	210.17	p53 CDE Pos		DAZAP1	AGGGAATACTTCAAGAAGTT	54	207.116	p53 CDE Pos		DAZAP1	AGGGAATACTTCAAGAAGTT	58	161.915	p53 CDE Pos		DAZAP1	AGGGAATACTTCAAGAAGTT	129	516.707	p53 CDE Pos		DAZAP1	AGGGAATACTTCAAGAAGTT	87	235.859	p53 CDE Pos		DAZAP1	AGGGAATACTTCAAGAAGTT	35	203.234	p53 CDE Pos		DAZAP1	AGGGAATACTTCAAGAAGTT	33	120.73	p53 CDE Pos		DAZAP1	AGGGAATACTTCAAGAAGTT	12	37.6912	p53 CDE Pos
DAZAP1	ATACTTCAAGAAGTTCGGAG	25	128.153	p53 CDE Pos		DAZAP1	ATACTTCAAGAAGTTCGGAG	35	134.242	p53 CDE Pos		DAZAP1	ATACTTCAAGAAGTTCGGAG	28	78.166	p53 CDE Pos		DAZAP1	ATACTTCAAGAAGTTCGGAG	55	220.301	p53 CDE Pos		DAZAP1	ATACTTCAAGAAGTTCGGAG	41	111.152	p53 CDE Pos		DAZAP1	ATACTTCAAGAAGTTCGGAG	10	58.067	p53 CDE Pos		DAZAP1	ATACTTCAAGAAGTTCGGAG	25	91.4619	p53 CDE Pos		DAZAP1	ATACTTCAAGAAGTTCGGAG	22	69.1005	p53 CDE Pos
DAZAP1	ATTGTGGTGAGACAGAGCTC	17	87.1437	p53 CDE Pos		DAZAP1	ATTGTGGTGAGACAGAGCTC	54	207.116	p53 CDE Pos		DAZAP1	ATTGTGGTGAGACAGAGCTC	40	111.666	p53 CDE Pos		DAZAP1	ATTGTGGTGAGACAGAGCTC	3	12.0164	p53 CDE Pos		DAZAP1	ATTGTGGTGAGACAGAGCTC	58	157.239	p53 CDE Pos		DAZAP1	ATTGTGGTGAGACAGAGCTC	22	127.747	p53 CDE Pos		DAZAP1	ATTGTGGTGAGACAGAGCTC	0	0	p53 CDE Pos		DAZAP1	ATTGTGGTGAGACAGAGCTC	16	50.2549	p53 CDE Pos
DAZAP1	CCAAGCCATGCACACCCCGG	0	0	p53 CDE Pos		DAZAP1	CCAAGCCATGCACACCCCGG	0	0	p53 CDE Pos		DAZAP1	CCAAGCCATGCACACCCCGG	0	0	p53 CDE Pos		DAZAP1	CCAAGCCATGCACACCCCGG	0	0	p53 CDE Pos		DAZAP1	CCAAGCCATGCACACCCCGG	0	0	p53 CDE Pos		DAZAP1	CCAAGCCATGCACACCCCGG	0	0	p53 CDE Pos		DAZAP1	CCAAGCCATGCACACCCCGG	0	0	p53 CDE Pos		DAZAP1	CCAAGCCATGCACACCCCGG	0	0	p53 CDE Pos
DAZAP1	CCAAGCCATGCACACCCCGG	0	0	p53 CDE Pos		DAZAP1	CCAAGCCATGCACACCCCGG	0	0	p53 CDE Pos		DAZAP1	CCAAGCCATGCACACCCCGG	0	0	p53 CDE Pos		DAZAP1	CCAAGCCATGCACACCCCGG	0	0	p53 CDE Pos		DAZAP1	CCAAGCCATGCACACCCCGG	0	0	p53 CDE Pos		DAZAP1	CCAAGCCATGCACACCCCGG	0	0	p53 CDE Pos		DAZAP1	CCAAGCCATGCACACCCCGG	0	0	p53 CDE Pos		DAZAP1	CCAAGCCATGCACACCCCGG	0	0	p53 CDE Pos
DAZAP1	CTAGATCTGCCCTTACCTCG	60	307.566	p53 CDE Pos		DAZAP1	CTAGATCTGCCCTTACCTCG	127	487.107	p53 CDE Pos		DAZAP1	CTAGATCTGCCCTTACCTCG	46	128.416	p53 CDE Pos		DAZAP1	CTAGATCTGCCCTTACCTCG	8	32.0438	p53 CDE Pos		DAZAP1	CTAGATCTGCCCTTACCTCG	165	447.318	p53 CDE Pos		DAZAP1	CTAGATCTGCCCTTACCTCG	83	481.956	p53 CDE Pos		DAZAP1	CTAGATCTGCCCTTACCTCG	49	179.265	p53 CDE Pos		DAZAP1	CTAGATCTGCCCTTACCTCG	56	175.892	p53 CDE Pos
DAZAP1	GCTCAGCCAGACTTCCCCTA	30	153.783	p53 CDE Pos		DAZAP1	GCTCAGCCAGACTTCCCCTA	72	276.155	p53 CDE Pos		DAZAP1	GCTCAGCCAGACTTCCCCTA	143	399.205	p53 CDE Pos		DAZAP1	GCTCAGCCAGACTTCCCCTA	115	460.63	p53 CDE Pos		DAZAP1	GCTCAGCCAGACTTCCCCTA	103	279.235	p53 CDE Pos		DAZAP1	GCTCAGCCAGACTTCCCCTA	35	203.234	p53 CDE Pos		DAZAP1	GCTCAGCCAGACTTCCCCTA	71	259.752	p53 CDE Pos		DAZAP1	GCTCAGCCAGACTTCCCCTA	53	166.469	p53 CDE Pos
DAZAP1	GGAGGGGCAAACTGATCTGG	86	440.845	p53 CDE Pos		DAZAP1	GGAGGGGCAAACTGATCTGG	114	437.246	p53 CDE Pos		DAZAP1	GGAGGGGCAAACTGATCTGG	36	100.499	p53 CDE Pos		DAZAP1	GGAGGGGCAAACTGATCTGG	16	64.0877	p53 CDE Pos		DAZAP1	GGAGGGGCAAACTGATCTGG	145	393.098	p53 CDE Pos		DAZAP1	GGAGGGGCAAACTGATCTGG	74	429.695	p53 CDE Pos		DAZAP1	GGAGGGGCAAACTGATCTGG	31	113.413	p53 CDE Pos		DAZAP1	GGAGGGGCAAACTGATCTGG	324	1017.66	p53 CDE Pos
DAZAP1	GGTGGAATTCCTCACAATTG	57	292.188	p53 CDE Pos		DAZAP1	GGTGGAATTCCTCACAATTG	61	233.965	p53 CDE Pos		DAZAP1	GGTGGAATTCCTCACAATTG	187	522.037	p53 CDE Pos		DAZAP1	GGTGGAATTCCTCACAATTG	148	592.811	p53 CDE Pos		DAZAP1	GGTGGAATTCCTCACAATTG	122	330.744	p53 CDE Pos		DAZAP1	GGTGGAATTCCTCACAATTG	44	255.495	p53 CDE Pos		DAZAP1	GGTGGAATTCCTCACAATTG	12	43.9017	p53 CDE Pos		DAZAP1	GGTGGAATTCCTCACAATTG	10	31.4093	p53 CDE Pos
DAZAP1	TCTATGACGCCGAGAAGCAG	40	205.044	p53 CDE Pos		DAZAP1	TCTATGACGCCGAGAAGCAG	52	199.445	p53 CDE Pos		DAZAP1	TCTATGACGCCGAGAAGCAG	57	159.124	p53 CDE Pos		DAZAP1	TCTATGACGCCGAGAAGCAG	59	236.323	p53 CDE Pos		DAZAP1	TCTATGACGCCGAGAAGCAG	84	227.726	p53 CDE Pos		DAZAP1	TCTATGACGCCGAGAAGCAG	37	214.848	p53 CDE Pos		DAZAP1	TCTATGACGCCGAGAAGCAG	6	21.9508	p53 CDE Pos		DAZAP1	TCTATGACGCCGAGAAGCAG	0	0	p53 CDE Pos
DBNDD2	GGGCATACCAGACGACTGGG	31	158.909	p53 CDE Neg		DBNDD2	GGGCATACCAGACGACTGGG	44	168.761	p53 CDE Neg		DBNDD2	GGGCATACCAGACGACTGGG	124	346.164	p53 CDE Neg		DBNDD2	GGGCATACCAGACGACTGGG	139	556.762	p53 CDE Neg		DBNDD2	GGGCATACCAGACGACTGGG	70	189.771	p53 CDE Neg		DBNDD2	GGGCATACCAGACGACTGGG	24	139.361	p53 CDE Neg		DBNDD2	GGGCATACCAGACGACTGGG	18	65.8525	p53 CDE Neg		DBNDD2	GGGCATACCAGACGACTGGG	72	226.147	p53 CDE Neg
DBNDD2	AGGGGCATACCAGACGACTG	65	333.197	p53 CDE Neg		DBNDD2	AGGGGCATACCAGACGACTG	69	264.649	p53 CDE Neg		DBNDD2	AGGGGCATACCAGACGACTG	93	259.623	p53 CDE Neg		DBNDD2	AGGGGCATACCAGACGACTG	88	352.482	p53 CDE Neg		DBNDD2	AGGGGCATACCAGACGACTG	106	287.368	p53 CDE Neg		DBNDD2	AGGGGCATACCAGACGACTG	34	197.428	p53 CDE Neg		DBNDD2	AGGGGCATACCAGACGACTG	65	237.801	p53 CDE Neg		DBNDD2	AGGGGCATACCAGACGACTG	80	251.274	p53 CDE Neg
DBNDD2	GGGGCATACCAGACGACTGG	54	276.81	p53 CDE Neg		DBNDD2	GGGGCATACCAGACGACTGG	59	226.294	p53 CDE Neg		DBNDD2	GGGGCATACCAGACGACTGG	23	64.2078	p53 CDE Neg		DBNDD2	GGGGCATACCAGACGACTGG	42	168.23	p53 CDE Neg		DBNDD2	GGGGCATACCAGACGACTGG	97	262.969	p53 CDE Neg		DBNDD2	GGGGCATACCAGACGACTGG	47	272.915	p53 CDE Neg		DBNDD2	GGGGCATACCAGACGACTGG	93	340.238	p53 CDE Neg		DBNDD2	GGGGCATACCAGACGACTGG	46	144.483	p53 CDE Neg
DBNDD2	GGAAGTGAATGTGGACACAC	20	102.522	p53 CDE Neg		DBNDD2	GGAAGTGAATGTGGACACAC	29	111.229	p53 CDE Neg		DBNDD2	GGAAGTGAATGTGGACACAC	61	170.29	p53 CDE Neg		DBNDD2	GGAAGTGAATGTGGACACAC	32	128.175	p53 CDE Neg		DBNDD2	GGAAGTGAATGTGGACACAC	40	108.441	p53 CDE Neg		DBNDD2	GGAAGTGAATGTGGACACAC	19	110.327	p53 CDE Neg		DBNDD2	GGAAGTGAATGTGGACACAC	22	80.4864	p53 CDE Neg		DBNDD2	GGAAGTGAATGTGGACACAC	18	56.5367	p53 CDE Neg
DBNDD2	AGTAGAACTTATTGACCTTG	77	394.71	p53 CDE Neg		DBNDD2	AGTAGAACTTATTGACCTTG	140	536.968	p53 CDE Neg		DBNDD2	AGTAGAACTTATTGACCTTG	142	396.413	p53 CDE Neg		DBNDD2	AGTAGAACTTATTGACCTTG	146	584.8	p53 CDE Neg		DBNDD2	AGTAGAACTTATTGACCTTG	139	376.832	p53 CDE Neg		DBNDD2	AGTAGAACTTATTGACCTTG	84	487.762	p53 CDE Neg		DBNDD2	AGTAGAACTTATTGACCTTG	42	153.656	p53 CDE Neg		DBNDD2	AGTAGAACTTATTGACCTTG	65	204.16	p53 CDE Neg
DBNDD2	GGATGAGATACTACCTATGG	39	199.918	p53 CDE Neg		DBNDD2	GGATGAGATACTACCTATGG	91	349.029	p53 CDE Neg		DBNDD2	GGATGAGATACTACCTATGG	101	281.956	p53 CDE Neg		DBNDD2	GGATGAGATACTACCTATGG	43	172.236	p53 CDE Neg		DBNDD2	GGATGAGATACTACCTATGG	103	279.235	p53 CDE Neg		DBNDD2	GGATGAGATACTACCTATGG	31	180.008	p53 CDE Neg		DBNDD2	GGATGAGATACTACCTATGG	56	204.875	p53 CDE Neg		DBNDD2	GGATGAGATACTACCTATGG	55	172.751	p53 CDE Neg
DBNDD2	GGAGCGGCAAAAATTCTTCG	48	246.053	p53 CDE Neg		DBNDD2	GGAGCGGCAAAAATTCTTCG	104	398.891	p53 CDE Neg		DBNDD2	GGAGCGGCAAAAATTCTTCG	125	348.955	p53 CDE Neg		DBNDD2	GGAGCGGCAAAAATTCTTCG	102	408.559	p53 CDE Neg		DBNDD2	GGAGCGGCAAAAATTCTTCG	133	360.566	p53 CDE Neg		DBNDD2	GGAGCGGCAAAAATTCTTCG	56	325.175	p53 CDE Neg		DBNDD2	GGAGCGGCAAAAATTCTTCG	23	84.1449	p53 CDE Neg		DBNDD2	GGAGCGGCAAAAATTCTTCG	44	138.201	p53 CDE Neg
DBNDD2	CTGCGACTCGAGATGCAGAT	80	410.088	p53 CDE Neg		DBNDD2	CTGCGACTCGAGATGCAGAT	152	582.994	p53 CDE Neg		DBNDD2	CTGCGACTCGAGATGCAGAT	122	340.58	p53 CDE Neg		DBNDD2	CTGCGACTCGAGATGCAGAT	84	336.46	p53 CDE Neg		DBNDD2	CTGCGACTCGAGATGCAGAT	151	409.364	p53 CDE Neg		DBNDD2	CTGCGACTCGAGATGCAGAT	91	528.409	p53 CDE Neg		DBNDD2	CTGCGACTCGAGATGCAGAT	34	124.388	p53 CDE Neg		DBNDD2	CTGCGACTCGAGATGCAGAT	74	232.429	p53 CDE Neg
DBNDD2	TGTCTGATGTAGGCACCGGC	61	312.692	p53 CDE Neg		DBNDD2	TGTCTGATGTAGGCACCGGC	47	180.268	p53 CDE Neg		DBNDD2	TGTCTGATGTAGGCACCGGC	179	499.704	p53 CDE Neg		DBNDD2	TGTCTGATGTAGGCACCGGC	79	316.433	p53 CDE Neg		DBNDD2	TGTCTGATGTAGGCACCGGC	122	330.744	p53 CDE Neg		DBNDD2	TGTCTGATGTAGGCACCGGC	37	214.848	p53 CDE Neg		DBNDD2	TGTCTGATGTAGGCACCGGC	373	1364.61	p53 CDE Neg		DBNDD2	TGTCTGATGTAGGCACCGGC	510	1601.87	p53 CDE Neg
DBNDD2	GAGCTGCTGGCGCTCCAGGG	7	35.8827	p53 CDE Neg		DBNDD2	GAGCTGCTGGCGCTCCAGGG	43	164.926	p53 CDE Neg		DBNDD2	GAGCTGCTGGCGCTCCAGGG	16	44.6663	p53 CDE Neg		DBNDD2	GAGCTGCTGGCGCTCCAGGG	13	52.0712	p53 CDE Neg		DBNDD2	GAGCTGCTGGCGCTCCAGGG	46	124.707	p53 CDE Neg		DBNDD2	GAGCTGCTGGCGCTCCAGGG	7	40.6469	p53 CDE Neg		DBNDD2	GAGCTGCTGGCGCTCCAGGG	36	131.705	p53 CDE Neg		DBNDD2	GAGCTGCTGGCGCTCCAGGG	18	56.5367	p53 CDE Neg
DDAH2	AGAGGCCTACGAAAAACTCC	31	158.909	p53 CDE Neg		DDAH2	AGAGGCCTACGAAAAACTCC	38	145.749	p53 CDE Neg		DDAH2	AGAGGCCTACGAAAAACTCC	6	16.7499	p53 CDE Neg		DDAH2	AGAGGCCTACGAAAAACTCC	10	40.0548	p53 CDE Neg		DDAH2	AGAGGCCTACGAAAAACTCC	61	165.372	p53 CDE Neg		DDAH2	AGAGGCCTACGAAAAACTCC	48	278.721	p53 CDE Neg		DDAH2	AGAGGCCTACGAAAAACTCC	91	332.921	p53 CDE Neg		DDAH2	AGAGGCCTACGAAAAACTCC	175	549.663	p53 CDE Neg
DDAH2	CCACGGTGCAGGAGGAAAGG	7	35.8827	p53 CDE Neg		DDAH2	CCACGGTGCAGGAGGAAAGG	16	61.3678	p53 CDE Neg		DDAH2	CCACGGTGCAGGAGGAAAGG	20	55.8329	p53 CDE Neg		DDAH2	CCACGGTGCAGGAGGAAAGG	3	12.0164	p53 CDE Neg		DDAH2	CCACGGTGCAGGAGGAAAGG	36	97.5967	p53 CDE Neg		DDAH2	CCACGGTGCAGGAGGAAAGG	10	58.067	p53 CDE Neg		DDAH2	CCACGGTGCAGGAGGAAAGG	0	0	p53 CDE Neg		DDAH2	CCACGGTGCAGGAGGAAAGG	0	0	p53 CDE Neg
DDAH2	CCATGCCGCAGAGACCGCGC	23	117.9	p53 CDE Neg		DDAH2	CCATGCCGCAGAGACCGCGC	40	153.42	p53 CDE Neg		DDAH2	CCATGCCGCAGAGACCGCGC	41	114.457	p53 CDE Neg		DDAH2	CCATGCCGCAGAGACCGCGC	16	64.0877	p53 CDE Neg		DDAH2	CCATGCCGCAGAGACCGCGC	57	154.528	p53 CDE Neg		DDAH2	CCATGCCGCAGAGACCGCGC	14	81.2937	p53 CDE Neg		DDAH2	CCATGCCGCAGAGACCGCGC	4	14.6339	p53 CDE Neg		DDAH2	CCATGCCGCAGAGACCGCGC	13	40.8321	p53 CDE Neg
DDAH2	CCGAGGAGCTGAGATCGTGG	32	164.035	p53 CDE Neg		DDAH2	CCGAGGAGCTGAGATCGTGG	76	291.497	p53 CDE Neg		DDAH2	CCGAGGAGCTGAGATCGTGG	173	482.954	p53 CDE Neg		DDAH2	CCGAGGAGCTGAGATCGTGG	86	344.471	p53 CDE Neg		DDAH2	CCGAGGAGCTGAGATCGTGG	92	249.414	p53 CDE Neg		DDAH2	CCGAGGAGCTGAGATCGTGG	50	290.335	p53 CDE Neg		DDAH2	CCGAGGAGCTGAGATCGTGG	33	120.73	p53 CDE Neg		DDAH2	CCGAGGAGCTGAGATCGTGG	16	50.2549	p53 CDE Neg
DDAH2	CGACACGGCCGTGATCCAAG	95	486.98	p53 CDE Neg		DDAH2	CGACACGGCCGTGATCCAAG	109	418.068	p53 CDE Neg		DDAH2	CGACACGGCCGTGATCCAAG	116	323.831	p53 CDE Neg		DDAH2	CGACACGGCCGTGATCCAAG	80	320.438	p53 CDE Neg		DDAH2	CGACACGGCCGTGATCCAAG	104	281.946	p53 CDE Neg		DDAH2	CGACACGGCCGTGATCCAAG	54	313.562	p53 CDE Neg		DDAH2	CGACACGGCCGTGATCCAAG	114	417.066	p53 CDE Neg		DDAH2	CGACACGGCCGTGATCCAAG	187	587.354	p53 CDE Neg
DDAH2	GCAAAGCCCTGCAAGACCTG	38	194.792	p53 CDE Neg		DDAH2	GCAAAGCCCTGCAAGACCTG	58	222.458	p53 CDE Neg		DDAH2	GCAAAGCCCTGCAAGACCTG	93	259.623	p53 CDE Neg		DDAH2	GCAAAGCCCTGCAAGACCTG	76	304.416	p53 CDE Neg		DDAH2	GCAAAGCCCTGCAAGACCTG	86	233.148	p53 CDE Neg		DDAH2	GCAAAGCCCTGCAAGACCTG	34	197.428	p53 CDE Neg		DDAH2	GCAAAGCCCTGCAAGACCTG	3	10.9754	p53 CDE Neg		DDAH2	GCAAAGCCCTGCAAGACCTG	0	0	p53 CDE Neg
DDAH2	GCTCACCTCTGGCCTACGAG	24	123.026	p53 CDE Neg		DDAH2	GCTCACCTCTGGCCTACGAG	41	157.255	p53 CDE Neg		DDAH2	GCTCACCTCTGGCCTACGAG	75	209.373	p53 CDE Neg		DDAH2	GCTCACCTCTGGCCTACGAG	48	192.263	p53 CDE Neg		DDAH2	GCTCACCTCTGGCCTACGAG	89	241.281	p53 CDE Neg		DDAH2	GCTCACCTCTGGCCTACGAG	45	261.301	p53 CDE Neg		DDAH2	GCTCACCTCTGGCCTACGAG	34	124.388	p53 CDE Neg		DDAH2	GCTCACCTCTGGCCTACGAG	32	100.51	p53 CDE Neg
DDAH2	GGATCTGGCCAAAGCTCAAA	120	615.132	p53 CDE Neg		DDAH2	GGATCTGGCCAAAGCTCAAA	231	885.998	p53 CDE Neg		DDAH2	GGATCTGGCCAAAGCTCAAA	292	815.16	p53 CDE Neg		DDAH2	GGATCTGGCCAAAGCTCAAA	367	1470.01	p53 CDE Neg		DDAH2	GGATCTGGCCAAAGCTCAAA	294	797.04	p53 CDE Neg		DDAH2	GGATCTGGCCAAAGCTCAAA	122	708.417	p53 CDE Neg		DDAH2	GGATCTGGCCAAAGCTCAAA	34	124.388	p53 CDE Neg		DDAH2	GGATCTGGCCAAAGCTCAAA	23	72.2414	p53 CDE Neg
DDAH2	GGGACCCGAGACTGGCACAG	53	271.683	p53 CDE Neg		DDAH2	GGGACCCGAGACTGGCACAG	73	279.991	p53 CDE Neg		DDAH2	GGGACCCGAGACTGGCACAG	92	256.831	p53 CDE Neg		DDAH2	GGGACCCGAGACTGGCACAG	38	152.208	p53 CDE Neg		DDAH2	GGGACCCGAGACTGGCACAG	77	208.748	p53 CDE Neg		DDAH2	GGGACCCGAGACTGGCACAG	35	203.234	p53 CDE Neg		DDAH2	GGGACCCGAGACTGGCACAG	2	7.31695	p53 CDE Neg		DDAH2	GGGACCCGAGACTGGCACAG	4	12.5637	p53 CDE Neg
DDAH2	TCGGGTCCCTCCCACCTGCG	52	266.557	p53 CDE Neg		DDAH2	TCGGGTCCCTCCCACCTGCG	73	279.991	p53 CDE Neg		DDAH2	TCGGGTCCCTCCCACCTGCG	168	468.996	p53 CDE Neg		DDAH2	TCGGGTCCCTCCCACCTGCG	96	384.526	p53 CDE Neg		DDAH2	TCGGGTCCCTCCCACCTGCG	93	252.125	p53 CDE Neg		DDAH2	TCGGGTCCCTCCCACCTGCG	37	214.848	p53 CDE Neg		DDAH2	TCGGGTCCCTCCCACCTGCG	64	234.142	p53 CDE Neg		DDAH2	TCGGGTCCCTCCCACCTGCG	211	662.736	p53 CDE Neg
DDX21	ACATCTGGTCCACTTCATCC	19	97.3959	p53 CDE Pos		DDX21	ACATCTGGTCCACTTCATCC	40	153.42	p53 CDE Pos		DDX21	ACATCTGGTCCACTTCATCC	10	27.9164	p53 CDE Pos		DDX21	ACATCTGGTCCACTTCATCC	6	24.0329	p53 CDE Pos		DDX21	ACATCTGGTCCACTTCATCC	48	130.129	p53 CDE Pos		DDX21	ACATCTGGTCCACTTCATCC	20	116.134	p53 CDE Pos		DDX21	ACATCTGGTCCACTTCATCC	0	0	p53 CDE Pos		DDX21	ACATCTGGTCCACTTCATCC	0	0	p53 CDE Pos
DDX21	AGACACCGCAATGAAAAAAG	33	169.161	p53 CDE Pos		DDX21	AGACACCGCAATGAAAAAAG	49	187.939	p53 CDE Pos		DDX21	AGACACCGCAATGAAAAAAG	63	175.874	p53 CDE Pos		DDX21	AGACACCGCAATGAAAAAAG	46	184.252	p53 CDE Pos		DDX21	AGACACCGCAATGAAAAAAG	76	206.037	p53 CDE Pos		DDX21	AGACACCGCAATGAAAAAAG	47	272.915	p53 CDE Pos		DDX21	AGACACCGCAATGAAAAAAG	85	310.97	p53 CDE Pos		DDX21	AGACACCGCAATGAAAAAAG	41	128.778	p53 CDE Pos
DDX21	AGTGGAAGAGATTTTAAGTG	0	0	p53 CDE Pos		DDX21	AGTGGAAGAGATTTTAAGTG	0	0	p53 CDE Pos		DDX21	AGTGGAAGAGATTTTAAGTG	0	0	p53 CDE Pos		DDX21	AGTGGAAGAGATTTTAAGTG	0	0	p53 CDE Pos		DDX21	AGTGGAAGAGATTTTAAGTG	0	0	p53 CDE Pos		DDX21	AGTGGAAGAGATTTTAAGTG	0	0	p53 CDE Pos		DDX21	AGTGGAAGAGATTTTAAGTG	0	0	p53 CDE Pos		DDX21	AGTGGAAGAGATTTTAAGTG	0	0	p53 CDE Pos
DDX21	ATACCTGTGGAACAAAAAGA	51	261.431	p53 CDE Pos		DDX21	ATACCTGTGGAACAAAAAGA	22	84.3807	p53 CDE Pos		DDX21	ATACCTGTGGAACAAAAAGA	48	133.999	p53 CDE Pos		DDX21	ATACCTGTGGAACAAAAAGA	7	28.0384	p53 CDE Pos		DDX21	ATACCTGTGGAACAAAAAGA	59	159.95	p53 CDE Pos		DDX21	ATACCTGTGGAACAAAAAGA	21	121.941	p53 CDE Pos		DDX21	ATACCTGTGGAACAAAAAGA	21	76.828	p53 CDE Pos		DDX21	ATACCTGTGGAACAAAAAGA	16	50.2549	p53 CDE Pos
DDX21	ATTTCTGTTACTGATGCGGT	82	420.34	p53 CDE Pos		DDX21	ATTTCTGTTACTGATGCGGT	82	314.51	p53 CDE Pos		DDX21	ATTTCTGTTACTGATGCGGT	41	114.457	p53 CDE Pos		DDX21	ATTTCTGTTACTGATGCGGT	17	68.0932	p53 CDE Pos		DDX21	ATTTCTGTTACTGATGCGGT	126	341.588	p53 CDE Pos		DDX21	ATTTCTGTTACTGATGCGGT	43	249.688	p53 CDE Pos		DDX21	ATTTCTGTTACTGATGCGGT	0	0	p53 CDE Pos		DDX21	ATTTCTGTTACTGATGCGGT	6	18.8456	p53 CDE Pos
DDX21	CTGTATTTCTGTTACTGATG	128	656.141	p53 CDE Pos		DDX21	CTGTATTTCTGTTACTGATG	125	479.436	p53 CDE Pos		DDX21	CTGTATTTCTGTTACTGATG	141	393.622	p53 CDE Pos		DDX21	CTGTATTTCTGTTACTGATG	148	592.811	p53 CDE Pos		DDX21	CTGTATTTCTGTTACTGATG	171	463.584	p53 CDE Pos		DDX21	CTGTATTTCTGTTACTGATG	69	400.662	p53 CDE Pos		DDX21	CTGTATTTCTGTTACTGATG	42	153.656	p53 CDE Pos		DDX21	CTGTATTTCTGTTACTGATG	22	69.1005	p53 CDE Pos
DDX21	GACACTGCGAAAGCAAACCG	40	205.044	p53 CDE Pos		DDX21	GACACTGCGAAAGCAAACCG	79	303.004	p53 CDE Pos		DDX21	GACACTGCGAAAGCAAACCG	91	254.04	p53 CDE Pos		DDX21	GACACTGCGAAAGCAAACCG	51	204.279	p53 CDE Pos		DDX21	GACACTGCGAAAGCAAACCG	74	200.615	p53 CDE Pos		DDX21	GACACTGCGAAAGCAAACCG	43	249.688	p53 CDE Pos		DDX21	GACACTGCGAAAGCAAACCG	8	29.2678	p53 CDE Pos		DDX21	GACACTGCGAAAGCAAACCG	0	0	p53 CDE Pos
DDX21	GCAACATTAAATACCCAATG	36	184.54	p53 CDE Pos		DDX21	GCAACATTAAATACCCAATG	37	141.913	p53 CDE Pos		DDX21	GCAACATTAAATACCCAATG	86	240.081	p53 CDE Pos		DDX21	GCAACATTAAATACCCAATG	46	184.252	p53 CDE Pos		DDX21	GCAACATTAAATACCCAATG	65	176.216	p53 CDE Pos		DDX21	GCAACATTAAATACCCAATG	36	209.041	p53 CDE Pos		DDX21	GCAACATTAAATACCCAATG	0	0	p53 CDE Pos		DDX21	GCAACATTAAATACCCAATG	1	3.14093	p53 CDE Pos
DDX21	GTTAATTTGTTCATAGGCCG	46	235.801	p53 CDE Pos		DDX21	GTTAATTTGTTCATAGGCCG	83	318.346	p53 CDE Pos		DDX21	GTTAATTTGTTCATAGGCCG	55	153.54	p53 CDE Pos		DDX21	GTTAATTTGTTCATAGGCCG	35	140.192	p53 CDE Pos		DDX21	GTTAATTTGTTCATAGGCCG	83	225.015	p53 CDE Pos		DDX21	GTTAATTTGTTCATAGGCCG	45	261.301	p53 CDE Pos		DDX21	GTTAATTTGTTCATAGGCCG	229	837.791	p53 CDE Pos		DDX21	GTTAATTTGTTCATAGGCCG	736	2311.72	p53 CDE Pos
DDX21	TATGGGATTTGCTGATCAAG	69	353.701	p53 CDE Pos		DDX21	TATGGGATTTGCTGATCAAG	136	521.626	p53 CDE Pos		DDX21	TATGGGATTTGCTGATCAAG	139	388.038	p53 CDE Pos		DDX21	TATGGGATTTGCTGATCAAG	62	248.34	p53 CDE Pos		DDX21	TATGGGATTTGCTGATCAAG	199	539.493	p53 CDE Pos		DDX21	TATGGGATTTGCTGATCAAG	71	412.275	p53 CDE Pos		DDX21	TATGGGATTTGCTGATCAAG	34	124.388	p53 CDE Pos		DDX21	TATGGGATTTGCTGATCAAG	10	31.4093	p53 CDE Pos
DDX31	ACATTCATTTTAGTCGGCTG	0	0	p53 CDE Pos		DDX31	ACATTCATTTTAGTCGGCTG	0	0	p53 CDE Pos		DDX31	ACATTCATTTTAGTCGGCTG	0	0	p53 CDE Pos		DDX31	ACATTCATTTTAGTCGGCTG	0	0	p53 CDE Pos		DDX31	ACATTCATTTTAGTCGGCTG	0	0	p53 CDE Pos		DDX31	ACATTCATTTTAGTCGGCTG	0	0	p53 CDE Pos		DDX31	ACATTCATTTTAGTCGGCTG	0	0	p53 CDE Pos		DDX31	ACATTCATTTTAGTCGGCTG	0	0	p53 CDE Pos
DDX31	ACTCGTCCCGAGGGGAGCCG	22	112.774	p53 CDE Pos		DDX31	ACTCGTCCCGAGGGGAGCCG	9	34.5194	p53 CDE Pos		DDX31	ACTCGTCCCGAGGGGAGCCG	36	100.499	p53 CDE Pos		DDX31	ACTCGTCCCGAGGGGAGCCG	11	44.0603	p53 CDE Pos		DDX31	ACTCGTCCCGAGGGGAGCCG	12	32.5322	p53 CDE Pos		DDX31	ACTCGTCCCGAGGGGAGCCG	3	17.4201	p53 CDE Pos		DDX31	ACTCGTCCCGAGGGGAGCCG	0	0	p53 CDE Pos		DDX31	ACTCGTCCCGAGGGGAGCCG	0	0	p53 CDE Pos
DDX31	CTAGTGTTAAAGAAACTCAG	58	297.314	p53 CDE Pos		DDX31	CTAGTGTTAAAGAAACTCAG	61	233.965	p53 CDE Pos		DDX31	CTAGTGTTAAAGAAACTCAG	144	401.997	p53 CDE Pos		DDX31	CTAGTGTTAAAGAAACTCAG	90	360.493	p53 CDE Pos		DDX31	CTAGTGTTAAAGAAACTCAG	90	243.992	p53 CDE Pos		DDX31	CTAGTGTTAAAGAAACTCAG	44	255.495	p53 CDE Pos		DDX31	CTAGTGTTAAAGAAACTCAG	14	51.2186	p53 CDE Pos		DDX31	CTAGTGTTAAAGAAACTCAG	8	25.1274	p53 CDE Pos
DDX31	CTCAACTCCTGGACGCCTGG	71	363.953	p53 CDE Pos		DDX31	CTCAACTCCTGGACGCCTGG	94	360.536	p53 CDE Pos		DDX31	CTCAACTCCTGGACGCCTGG	193	538.787	p53 CDE Pos		DDX31	CTCAACTCCTGGACGCCTGG	94	376.515	p53 CDE Pos		DDX31	CTCAACTCCTGGACGCCTGG	95	257.547	p53 CDE Pos		DDX31	CTCAACTCCTGGACGCCTGG	57	330.982	p53 CDE Pos		DDX31	CTCAACTCCTGGACGCCTGG	0	0	p53 CDE Pos		DDX31	CTCAACTCCTGGACGCCTGG	15	47.114	p53 CDE Pos
DDX31	CTGGACCACAGGGATGCAAT	28	143.531	p53 CDE Pos		DDX31	CTGGACCACAGGGATGCAAT	52	199.445	p53 CDE Pos		DDX31	CTGGACCACAGGGATGCAAT	78	217.748	p53 CDE Pos		DDX31	CTGGACCACAGGGATGCAAT	59	236.323	p53 CDE Pos		DDX31	CTGGACCACAGGGATGCAAT	101	273.813	p53 CDE Pos		DDX31	CTGGACCACAGGGATGCAAT	41	238.074	p53 CDE Pos		DDX31	CTGGACCACAGGGATGCAAT	14	51.2186	p53 CDE Pos		DDX31	CTGGACCACAGGGATGCAAT	26	81.6642	p53 CDE Pos
DDX31	GCTTGAAGGGACTGGACCAC	17	87.1437	p53 CDE Pos		DDX31	GCTTGAAGGGACTGGACCAC	47	180.268	p53 CDE Pos		DDX31	GCTTGAAGGGACTGGACCAC	57	159.124	p53 CDE Pos		DDX31	GCTTGAAGGGACTGGACCAC	52	208.285	p53 CDE Pos		DDX31	GCTTGAAGGGACTGGACCAC	29	78.6195	p53 CDE Pos		DDX31	GCTTGAAGGGACTGGACCAC	16	92.9071	p53 CDE Pos		DDX31	GCTTGAAGGGACTGGACCAC	10	36.5847	p53 CDE Pos		DDX31	GCTTGAAGGGACTGGACCAC	16	50.2549	p53 CDE Pos
DDX31	TCTTGCCTATTGCATCCCTG	0	0	p53 CDE Pos		DDX31	TCTTGCCTATTGCATCCCTG	0	0	p53 CDE Pos		DDX31	TCTTGCCTATTGCATCCCTG	0	0	p53 CDE Pos		DDX31	TCTTGCCTATTGCATCCCTG	0	0	p53 CDE Pos		DDX31	TCTTGCCTATTGCATCCCTG	0	0	p53 CDE Pos		DDX31	TCTTGCCTATTGCATCCCTG	0	0	p53 CDE Pos		DDX31	TCTTGCCTATTGCATCCCTG	0	0	p53 CDE Pos		DDX31	TCTTGCCTATTGCATCCCTG	0	0	p53 CDE Pos
DDX31	TCTTGCCTATTGCATCCCTG	0	0	p53 CDE Pos		DDX31	TCTTGCCTATTGCATCCCTG	0	0	p53 CDE Pos		DDX31	TCTTGCCTATTGCATCCCTG	0	0	p53 CDE Pos		DDX31	TCTTGCCTATTGCATCCCTG	0	0	p53 CDE Pos		DDX31	TCTTGCCTATTGCATCCCTG	0	0	p53 CDE Pos		DDX31	TCTTGCCTATTGCATCCCTG	0	0	p53 CDE Pos		DDX31	TCTTGCCTATTGCATCCCTG	0	0	p53 CDE Pos		DDX31	TCTTGCCTATTGCATCCCTG	0	0	p53 CDE Pos
DDX31	TGGATTTTATATGATCCACC	0	0	p53 CDE Pos		DDX31	TGGATTTTATATGATCCACC	0	0	p53 CDE Pos		DDX31	TGGATTTTATATGATCCACC	0	0	p53 CDE Pos		DDX31	TGGATTTTATATGATCCACC	0	0	p53 CDE Pos		DDX31	TGGATTTTATATGATCCACC	0	0	p53 CDE Pos		DDX31	TGGATTTTATATGATCCACC	0	0	p53 CDE Pos		DDX31	TGGATTTTATATGATCCACC	0	0	p53 CDE Pos		DDX31	TGGATTTTATATGATCCACC	0	0	p53 CDE Pos
DDX31	TGGTCTGCGTGGGTGACGCG	19	97.3959	p53 CDE Pos		DDX31	TGGTCTGCGTGGGTGACGCG	29	111.229	p53 CDE Pos		DDX31	TGGTCTGCGTGGGTGACGCG	102	284.748	p53 CDE Pos		DDX31	TGGTCTGCGTGGGTGACGCG	47	188.258	p53 CDE Pos		DDX31	TGGTCTGCGTGGGTGACGCG	69	187.06	p53 CDE Pos		DDX31	TGGTCTGCGTGGGTGACGCG	22	127.747	p53 CDE Pos		DDX31	TGGTCTGCGTGGGTGACGCG	12	43.9017	p53 CDE Pos		DDX31	TGGTCTGCGTGGGTGACGCG	2	6.28186	p53 CDE Pos
DDX41	AAGCGATGCCTATCATGTCA	36	184.54	p53 CDE Neutral		DDX41	AAGCGATGCCTATCATGTCA	96	368.207	p53 CDE Neutral		DDX41	AAGCGATGCCTATCATGTCA	39	108.874	p53 CDE Neutral		DDX41	AAGCGATGCCTATCATGTCA	36	144.197	p53 CDE Neutral		DDX41	AAGCGATGCCTATCATGTCA	123	333.455	p53 CDE Neutral		DDX41	AAGCGATGCCTATCATGTCA	37	214.848	p53 CDE Neutral		DDX41	AAGCGATGCCTATCATGTCA	3	10.9754	p53 CDE Neutral		DDX41	AAGCGATGCCTATCATGTCA	0	0	p53 CDE Neutral
DDX41	ATGTCGTCCTCATCTCCCCG	50	256.305	p53 CDE Neutral		DDX41	ATGTCGTCCTCATCTCCCCG	92	352.865	p53 CDE Neutral		DDX41	ATGTCGTCCTCATCTCCCCG	80	223.331	p53 CDE Neutral		DDX41	ATGTCGTCCTCATCTCCCCG	76	304.416	p53 CDE Neutral		DDX41	ATGTCGTCCTCATCTCCCCG	150	406.653	p53 CDE Neutral		DDX41	ATGTCGTCCTCATCTCCCCG	45	261.301	p53 CDE Neutral		DDX41	ATGTCGTCCTCATCTCCCCG	1	3.65847	p53 CDE Neutral		DDX41	ATGTCGTCCTCATCTCCCCG	3	9.42279	p53 CDE Neutral
DDX41	CATCAATTATGACATGCCAG	64	328.071	p53 CDE Neutral		DDX41	CATCAATTATGACATGCCAG	89	341.358	p53 CDE Neutral		DDX41	CATCAATTATGACATGCCAG	124	346.164	p53 CDE Neutral		DDX41	CATCAATTATGACATGCCAG	123	492.674	p53 CDE Neutral		DDX41	CATCAATTATGACATGCCAG	156	422.919	p53 CDE Neutral		DDX41	CATCAATTATGACATGCCAG	66	383.242	p53 CDE Neutral		DDX41	CATCAATTATGACATGCCAG	76	278.044	p53 CDE Neutral		DDX41	CATCAATTATGACATGCCAG	63	197.879	p53 CDE Neutral
DDX41	GACATGCTCAGAACATAACG	79	404.962	p53 CDE Neutral		DDX41	GACATGCTCAGAACATAACG	100	383.549	p53 CDE Neutral		DDX41	GACATGCTCAGAACATAACG	40	111.666	p53 CDE Neutral		DDX41	GACATGCTCAGAACATAACG	36	144.197	p53 CDE Neutral		DDX41	GACATGCTCAGAACATAACG	140	379.543	p53 CDE Neutral		DDX41	GACATGCTCAGAACATAACG	56	325.175	p53 CDE Neutral		DDX41	GACATGCTCAGAACATAACG	10	36.5847	p53 CDE Neutral		DDX41	GACATGCTCAGAACATAACG	0	0	p53 CDE Neutral
DDX41	GGAACGGACTAAGGCCATCG	41	210.17	p53 CDE Neutral		DDX41	GGAACGGACTAAGGCCATCG	44	168.761	p53 CDE Neutral		DDX41	GGAACGGACTAAGGCCATCG	60	167.499	p53 CDE Neutral		DDX41	GGAACGGACTAAGGCCATCG	34	136.186	p53 CDE Neutral		DDX41	GGAACGGACTAAGGCCATCG	40	108.441	p53 CDE Neutral		DDX41	GGAACGGACTAAGGCCATCG	22	127.747	p53 CDE Neutral		DDX41	GGAACGGACTAAGGCCATCG	2	7.31695	p53 CDE Neutral		DDX41	GGAACGGACTAAGGCCATCG	0	0	p53 CDE Neutral
DDX41	GGCCAGCCTATCTTACCGAG	33	169.161	p53 CDE Neutral		DDX41	GGCCAGCCTATCTTACCGAG	26	99.7227	p53 CDE Neutral		DDX41	GGCCAGCCTATCTTACCGAG	23	64.2078	p53 CDE Neutral		DDX41	GGCCAGCCTATCTTACCGAG	9	36.0493	p53 CDE Neutral		DDX41	GGCCAGCCTATCTTACCGAG	77	208.748	p53 CDE Neutral		DDX41	GGCCAGCCTATCTTACCGAG	22	127.747	p53 CDE Neutral		DDX41	GGCCAGCCTATCTTACCGAG	2	7.31695	p53 CDE Neutral		DDX41	GGCCAGCCTATCTTACCGAG	2	6.28186	p53 CDE Neutral
DDX41	GGCCATCGAGGCATTCCGGG	36	184.54	p53 CDE Neutral		DDX41	GGCCATCGAGGCATTCCGGG	51	195.61	p53 CDE Neutral		DDX41	GGCCATCGAGGCATTCCGGG	58	161.915	p53 CDE Neutral		DDX41	GGCCATCGAGGCATTCCGGG	19	76.1041	p53 CDE Neutral		DDX41	GGCCATCGAGGCATTCCGGG	74	200.615	p53 CDE Neutral		DDX41	GGCCATCGAGGCATTCCGGG	30	174.201	p53 CDE Neutral		DDX41	GGCCATCGAGGCATTCCGGG	10	36.5847	p53 CDE Neutral		DDX41	GGCCATCGAGGCATTCCGGG	230	722.414	p53 CDE Neutral
DDX41	GTTACCCTTCTCAAAGCGCG	18	92.2698	p53 CDE Neutral		DDX41	GTTACCCTTCTCAAAGCGCG	16	61.3678	p53 CDE Neutral		DDX41	GTTACCCTTCTCAAAGCGCG	43	120.041	p53 CDE Neutral		DDX41	GTTACCCTTCTCAAAGCGCG	38	152.208	p53 CDE Neutral		DDX41	GTTACCCTTCTCAAAGCGCG	20	54.2204	p53 CDE Neutral		DDX41	GTTACCCTTCTCAAAGCGCG	16	92.9071	p53 CDE Neutral		DDX41	GTTACCCTTCTCAAAGCGCG	17	62.1941	p53 CDE Neutral		DDX41	GTTACCCTTCTCAAAGCGCG	16	50.2549	p53 CDE Neutral
DDX41	TGTTTCCCGAGCGCCCGGTG	27	138.405	p53 CDE Neutral		DDX41	TGTTTCCCGAGCGCCCGGTG	55	210.952	p53 CDE Neutral		DDX41	TGTTTCCCGAGCGCCCGGTG	130	362.914	p53 CDE Neutral		DDX41	TGTTTCCCGAGCGCCCGGTG	72	288.395	p53 CDE Neutral		DDX41	TGTTTCCCGAGCGCCCGGTG	53	143.684	p53 CDE Neutral		DDX41	TGTTTCCCGAGCGCCCGGTG	22	127.747	p53 CDE Neutral		DDX41	TGTTTCCCGAGCGCCCGGTG	0	0	p53 CDE Neutral		DDX41	TGTTTCCCGAGCGCCCGGTG	2	6.28186	p53 CDE Neutral
DDX41	TTACCCTTCTCAAAGCGCGA	30	153.783	p53 CDE Neutral		DDX41	TTACCCTTCTCAAAGCGCGA	51	195.61	p53 CDE Neutral		DDX41	TTACCCTTCTCAAAGCGCGA	96	267.998	p53 CDE Neutral		DDX41	TTACCCTTCTCAAAGCGCGA	82	328.449	p53 CDE Neutral		DDX41	TTACCCTTCTCAAAGCGCGA	64	173.505	p53 CDE Neutral		DDX41	TTACCCTTCTCAAAGCGCGA	7	40.6469	p53 CDE Neutral		DDX41	TTACCCTTCTCAAAGCGCGA	12	43.9017	p53 CDE Neutral		DDX41	TTACCCTTCTCAAAGCGCGA	48	150.765	p53 CDE Neutral
DEPDC1B	CGACAGCGATGTTTCCGTAA	32	164.035	p53 CDE Neg		DEPDC1B	CGACAGCGATGTTTCCGTAA	26	99.7227	p53 CDE Neg		DEPDC1B	CGACAGCGATGTTTCCGTAA	75	209.373	p53 CDE Neg		DEPDC1B	CGACAGCGATGTTTCCGTAA	91	364.499	p53 CDE Neg		DEPDC1B	CGACAGCGATGTTTCCGTAA	63	170.794	p53 CDE Neg		DEPDC1B	CGACAGCGATGTTTCCGTAA	16	92.9071	p53 CDE Neg		DEPDC1B	CGACAGCGATGTTTCCGTAA	17	62.1941	p53 CDE Neg		DEPDC1B	CGACAGCGATGTTTCCGTAA	22	69.1005	p53 CDE Neg
DEPDC1B	GTATATAGTGTTAGCAAGCA	15	76.8915	p53 CDE Neg		DEPDC1B	GTATATAGTGTTAGCAAGCA	26	99.7227	p53 CDE Neg		DEPDC1B	GTATATAGTGTTAGCAAGCA	42	117.249	p53 CDE Neg		DEPDC1B	GTATATAGTGTTAGCAAGCA	26	104.142	p53 CDE Neg		DEPDC1B	GTATATAGTGTTAGCAAGCA	48	130.129	p53 CDE Neg		DEPDC1B	GTATATAGTGTTAGCAAGCA	21	121.941	p53 CDE Neg		DEPDC1B	GTATATAGTGTTAGCAAGCA	0	0	p53 CDE Neg		DEPDC1B	GTATATAGTGTTAGCAAGCA	8	25.1274	p53 CDE Neg
DEPDC1B	TCACAGTATTGCAATTGGAG	40	205.044	p53 CDE Neg		DEPDC1B	TCACAGTATTGCAATTGGAG	131	502.449	p53 CDE Neg		DEPDC1B	TCACAGTATTGCAATTGGAG	162	452.246	p53 CDE Neg		DEPDC1B	TCACAGTATTGCAATTGGAG	97	388.532	p53 CDE Neg		DEPDC1B	TCACAGTATTGCAATTGGAG	189	512.383	p53 CDE Neg		DEPDC1B	TCACAGTATTGCAATTGGAG	51	296.141	p53 CDE Neg		DEPDC1B	TCACAGTATTGCAATTGGAG	63	230.484	p53 CDE Neg		DEPDC1B	TCACAGTATTGCAATTGGAG	205	643.891	p53 CDE Neg
DEPDC1B	TAAATCAGGTTTGTTACAGA	31	158.909	p53 CDE Neg		DEPDC1B	TAAATCAGGTTTGTTACAGA	59	226.294	p53 CDE Neg		DEPDC1B	TAAATCAGGTTTGTTACAGA	78	217.748	p53 CDE Neg		DEPDC1B	TAAATCAGGTTTGTTACAGA	25	100.137	p53 CDE Neg		DEPDC1B	TAAATCAGGTTTGTTACAGA	96	260.258	p53 CDE Neg		DEPDC1B	TAAATCAGGTTTGTTACAGA	33	191.621	p53 CDE Neg		DEPDC1B	TAAATCAGGTTTGTTACAGA	416	1521.93	p53 CDE Neg		DEPDC1B	TAAATCAGGTTTGTTACAGA	723	2270.89	p53 CDE Neg
DEPDC1B	GTGACCATAGTAATCAGCTA	23	117.9	p53 CDE Neg		DEPDC1B	GTGACCATAGTAATCAGCTA	54	207.116	p53 CDE Neg		DEPDC1B	GTGACCATAGTAATCAGCTA	54	150.749	p53 CDE Neg		DEPDC1B	GTGACCATAGTAATCAGCTA	24	96.1315	p53 CDE Neg		DEPDC1B	GTGACCATAGTAATCAGCTA	77	208.748	p53 CDE Neg		DEPDC1B	GTGACCATAGTAATCAGCTA	29	168.394	p53 CDE Neg		DEPDC1B	GTGACCATAGTAATCAGCTA	39	142.68	p53 CDE Neg		DEPDC1B	GTGACCATAGTAATCAGCTA	93	292.107	p53 CDE Neg
DEPDC1B	TGAAGTGACCCGCAAACAAA	38	194.792	p53 CDE Neg		DEPDC1B	TGAAGTGACCCGCAAACAAA	67	256.978	p53 CDE Neg		DEPDC1B	TGAAGTGACCCGCAAACAAA	56	156.332	p53 CDE Neg		DEPDC1B	TGAAGTGACCCGCAAACAAA	77	308.422	p53 CDE Neg		DEPDC1B	TGAAGTGACCCGCAAACAAA	68	184.349	p53 CDE Neg		DEPDC1B	TGAAGTGACCCGCAAACAAA	38	220.654	p53 CDE Neg		DEPDC1B	TGAAGTGACCCGCAAACAAA	165	603.648	p53 CDE Neg		DEPDC1B	TGAAGTGACCCGCAAACAAA	367	1152.72	p53 CDE Neg
DEPDC1B	GAATGGAATGATCTCCCACC	30	153.783	p53 CDE Neg		DEPDC1B	GAATGGAATGATCTCCCACC	31	118.9	p53 CDE Neg		DEPDC1B	GAATGGAATGATCTCCCACC	59	164.707	p53 CDE Neg		DEPDC1B	GAATGGAATGATCTCCCACC	73	292.4	p53 CDE Neg		DEPDC1B	GAATGGAATGATCTCCCACC	52	140.973	p53 CDE Neg		DEPDC1B	GAATGGAATGATCTCCCACC	27	156.781	p53 CDE Neg		DEPDC1B	GAATGGAATGATCTCCCACC	5	18.2924	p53 CDE Neg		DEPDC1B	GAATGGAATGATCTCCCACC	0	0	p53 CDE Neg
DEPDC1B	GAAAGTTACAGCTATTGATG	77	394.71	p53 CDE Neg		DEPDC1B	GAAAGTTACAGCTATTGATG	114	437.246	p53 CDE Neg		DEPDC1B	GAAAGTTACAGCTATTGATG	32	89.3326	p53 CDE Neg		DEPDC1B	GAAAGTTACAGCTATTGATG	62	248.34	p53 CDE Neg		DEPDC1B	GAAAGTTACAGCTATTGATG	128	347.01	p53 CDE Neg		DEPDC1B	GAAAGTTACAGCTATTGATG	50	290.335	p53 CDE Neg		DEPDC1B	GAAAGTTACAGCTATTGATG	55	201.216	p53 CDE Neg		DEPDC1B	GAAAGTTACAGCTATTGATG	46	144.483	p53 CDE Neg
DEPDC1B	AAGACAATCGTCACTTATAC	12	61.5132	p53 CDE Neg		DEPDC1B	AAGACAATCGTCACTTATAC	38	145.749	p53 CDE Neg		DEPDC1B	AAGACAATCGTCACTTATAC	40	111.666	p53 CDE Neg		DEPDC1B	AAGACAATCGTCACTTATAC	34	136.186	p53 CDE Neg		DEPDC1B	AAGACAATCGTCACTTATAC	60	162.661	p53 CDE Neg		DEPDC1B	AAGACAATCGTCACTTATAC	50	290.335	p53 CDE Neg		DEPDC1B	AAGACAATCGTCACTTATAC	11	40.2432	p53 CDE Neg		DEPDC1B	AAGACAATCGTCACTTATAC	5	15.7047	p53 CDE Neg
DEPDC1B	CTTACAGAAAATTCTTGGCC	64	328.071	p53 CDE Neg		DEPDC1B	CTTACAGAAAATTCTTGGCC	80	306.839	p53 CDE Neg		DEPDC1B	CTTACAGAAAATTCTTGGCC	95	265.206	p53 CDE Neg		DEPDC1B	CTTACAGAAAATTCTTGGCC	134	536.734	p53 CDE Neg		DEPDC1B	CTTACAGAAAATTCTTGGCC	134	363.277	p53 CDE Neg		DEPDC1B	CTTACAGAAAATTCTTGGCC	44	255.495	p53 CDE Neg		DEPDC1B	CTTACAGAAAATTCTTGGCC	131	479.26	p53 CDE Neg		DEPDC1B	CTTACAGAAAATTCTTGGCC	34	106.792	p53 CDE Neg
[truncated: 3,759 more rows]

## Sheet: B_CRISPRi
D0_MNC1						D0_MNC2						D30_MNC1						D30_MNC2						D0_MUT1						D0_MUT2						D30_MUT1						D30_MUT2
[truncated: 4,672 more rows]
