# Supplementary material for: A systematic genome-wide mapping of oncogenic mutation selection during CRISPR-Cas9 genome editing
Source: Research Square preprint supplement (doi:10.21203/rs.3.rs-199044/v1), 2021-02-10
Supplement: Supplementary file 3 [file 4d61d5ae1cf392919f420737.xlsx]

## Sheet: readme
This document contains the data for CRISPR-KO and CRISPRi screens of CDE genes in KRAS isogenic MOLM13 cell lines.
Worksheet A: CRISPR-KO data
Worksheet B: CRISPRi data
Group names:
BD0_NC1, BD0_NC2: two replicates of Day 0 in KRAS wildtype cells
BD30_NC1, BD30_NC2: two replicates of Day 30 in KRAS wildtype cells
BD0_G1, BD0_G2: two replicates of Day 0 in KRAS mutant cells
BD30_G1, BD30_G2: two replicates of Day 30 in KRAS mutant cells

## Sheet: A_CRISPR-KO
KRAS wildtype											KRAS mutant
Gene group	Gene	sgRNA	BD0_NC1	BD0_NC2	BD30_NC1	BD30_NC2	Avg D0	Avg D30	Fold change D30/D0		Gene group	Gene	sgRNA	BD0_G1	BD0_G2	BD30_G1	BD30_G2	Avg D0	Avg D30	Fold change D30/D0	Enriched/Depleted
KRAS CDE Neg	CPEB1	TGCACTACACCTATAAACCG	156.793	93.0925	19776.5	31344.9	124.943	25560.7	204.579		KRAS CDE Pos	RBP1	CAGCGGCTGCCGGTGCTACG	190.698	144.366	25920.4	40482.6	167.532	33201.5	198.18	enriched
KRAS CDE Neutral	DUOXA2	CAGTGCGTTCGCGTACTCCG	36.5407	4.50448	2816.36	3354.49	20.5226	3085.42	150.343		KRAS CDE Pos	LOR	GGGAGCGTCAAGTACTCCGG	152.13	128.81	20955	27806.6	140.47	24380.8	173.566	enriched
KRAS CDE Pos	DBNDD2	GCGGAGCTGCTGGCGCTCCA	225.888	227.476	28465.6	26794.4	226.682	27630	121.889		KRAS CDE Pos	NKTR	GTGCCTGAAATGAAACCACA	295.689	208.46	45479.5	39152.9	252.075	42316.2	167.872	enriched
KRAS CDE Neg	LIG4	TGGTTAATAATAAAAAGCTA	149.485	89.3388	11409.1	12334.1	119.412	11871.6	99.4174		KRAS CDE Neutral	NKX2-5	GGCACGTGGATAGAAGGCGG	584.951	411.319	82345.1	76966.7	498.135	79655.9	159.908	enriched
KRAS CDE Neutral	ST3GAL6	AAACTTATCGCTACCATACA	400.619	278.527	26552.2	24372.5	339.573	25462.4	74.9835		KRAS CDE Pos	PDZRN3	AAGTGCGCGTACGCGACGCG	683.514	388.918	109510	52504.4	536.216	81007	151.072	enriched
KRAS CDE Neutral	LARP1B	CACGCTGAAAACCAGCAATC	67.102	212.461	9476.34	10932.9	139.782	10204.6	73.0041		KRAS CDE Neutral	CA8	AAAGTGTTAGGATTAAAGCA	578.523	415.053	75379.4	69868	496.788	72623.7	146.187	enriched
KRAS CDE Pos	FN1	CATACCACGTAGGAGAACAG	141.512	102.101	7042.84	8396.44	121.807	7719.64	63.3761		KRAS CDE Neutral	SLC9B1	TCAGGCTTTGAGGCATTTGA	332.115	248.285	40936.4	38390	290.2	39663.2	136.675	enriched
KRAS CDE Pos	GMPPA	CCTGCAAAGTGGCTCCATGG	306.942	230.479	16442.2	16494.8	268.71	16468.5	61.2871		KRAS CDE Neutral	C1orf87	AACCAATGACTGATAATGCA	426.393	293.088	36641.9	28417.1	359.74	32529.5	90.4248	enriched
KRAS CDE Neg	SCN10A	CCAGTTTGCAGCAGGGACAG	188.018	205.704	9906.08	7854.19	196.861	8880.14	45.1086		KRAS CDE Neutral	AXIN2	GCTTCCGTGAGGATGCCCCG	612.805	351.582	46448.2	40504	482.194	43476.1	90.1632	enriched
KRAS CDE Neutral	ELF2	TTACAGATACTACTACCAAA	269.072	385.884	13676.6	14589.2	327.478	14132.9	43.1568		KRAS CDE Neg	DPPA2	GGCCTCAACAGAAACAGGAA	323.544	426.876	39970.4	25109.6	375.21	32540	86.7248	enriched
KRAS CDE Pos	OBSCN	CTGGTTGTGCAGGTACTGGG	330.195	150.149	11019.4	8985.16	240.172	10002.3	41.6463		KRAS CDE Neg	STAT5A	ACCTGAAACCATTCACCACG	338.543	273.798	27961	13424.3	306.17	20692.6	67.5854	enriched
KRAS CDE Neg	ST8SIA4	GTTGTACAAAGAGCATTTGG	164.765	155.404	7836.08	5418.74	160.085	6627.41	41.3993		KRAS CDE Neutral	ELOVL3	TTGCAAGGCAGAAGGACCAG	265.692	171.746	9492.86	16438.9	218.719	12965.9	59.2811	enriched
KRAS CDE Neg	KRTAP4-2	CAAGAGCCACTAGAGCAGGT	177.388	149.399	7447.63	6065.09	163.393	6756.36	41.3503		KRAS CDE Pos	LEPROT	GATGTGCCTTAGAGGATTAT	1015.63	881.754	70426.8	38070.7	948.691	54248.7	57.1827	enriched
KRAS CDE Pos	LGALS2	ATCACAGGCAGCATCGCCGA	0	8.25821	202.183	104.111	4.1291	153.147	37.0896		KRAS CDE Neutral	ELF2	TAAAAGAAACTCCCACAAAT	70.7083	259.486	10385.4	6484.82	165.097	8435.1	51.0917	enriched
KRAS CDE Neg	P2RY12	TGTGAAATAAAATATGACGG	75.7389	274.773	6667.72	5725.49	175.256	6196.61	35.3575		KRAS CDE Neutral	CXCR5	AGGTCCATTTCCAGCGTTAG	518.528	250.774	10158.7	21897.2	384.651	16027.9	41.6688	enriched
KRAS CDE Pos	YWHAQ	GCTGAGATCCATCTGCACCA	337.503	392.64	12966.8	12448.1	365.072	12707.4	34.8081		KRAS CDE Neg	KBTBD3	AATCAACGAAGCACATGTAA	404.966	363.405	9065.67	19899.7	384.185	14482.7	37.6971	enriched
KRAS CDE Neutral	CROT	CCTGTACCTGGAAAACCACC	174.066	362.61	11382.9	6693.48	268.338	9038.18	33.682		KRAS CDE Pos	PDZD8	CAACAATGGGCACTTACTGA	372.826	210.949	12431.7	9025.15	291.887	10728.4	36.7553	enriched
KRAS CDE Neg	TTC26	TAAATACCTTGTGAGCCAAG	259.771	359.607	10535.9	9024.21	309.689	9780.03	31.5802		KRAS CDE Neg	ACTL7A	CACCCACAAGATCTCAACAA	164.986	232.728	5625.53	6394.06	198.857	6009.8	30.2217	enriched
KRAS CDE Neutral	WFDC12	TAACTCCTTCCACAGCCACC	195.327	189.939	5812.53	6299.34	192.633	6055.94	31.4378		KRAS CDE Neutral	POLR1D	CAAAGAACTTACCAACCCAT	47.1389	2.48907	1009.73	462.345	24.814	736.037	29.6622	enriched
KRAS CDE Pos	ARHGEF1	GGTTCCCGTCAGCATCATCG	336.174	478.976	10538.9	15027.9	407.575	12783.4	31.3645		KRAS CDE Neutral	SLC35G3	TGTCAGGAGTTCCCAGAAGG	128.561	215.927	4716.07	5144.87	172.244	4930.47	28.6249	enriched
KRAS CDE Pos	FN1	CACTTCCAAAGCCTAAGCAC	6.64376	157.657	2226.59	2753.37	82.1502	2489.98	30.3101		KRAS CDE Neg	NDRG4	AACTAGCACTTTACCCGACA	162.843	97.0738	3249.49	4153.4	129.959	3701.44	28.4817	enriched
KRAS CDE Neg	VDAC1	ACTAGGCACCGAGATTACTG	116.93	45.7955	2688.17	2234.67	81.3628	2461.42	30.2524		NTC	NTC	GCGTGCCATGGGAGGCCGTT	51.4242	189.17	3207.83	3590.02	120.297	3398.93	28.2545	enriched
NTC	NTC	GACTCCGGGTACTAAATGTC	647.102	624.621	15979.3	22217.2	635.861	19098.2	30.0352		KRAS CDE Pos	LRP10	GCAGTGCTCTTAGAAGTGCA	297.832	176.102	6236.31	5840.1	236.967	6038.21	25.4812	enriched
KRAS CDE Pos	KIF17	CAGAACTCGGATGAGGACAG	248.477	246.245	6396.71	8278.08	247.361	7337.39	29.6627		KRAS CDE Neutral	C14orf93	AGAGTTGCTTGGCATAAGCA	212.125	97.6961	2829.36	4149.97	154.911	3489.67	22.527	enriched
KRAS CDE Pos	DDAH1	GAAAATGCAACTTTAGATGG	212.6	202.701	7415.8	4885.79	207.651	6150.79	29.6208		KRAS CDE Neutral	CLEC3A	TCTTGTGAACTTTAGTGCCT	762.793	600.489	10516.7	18755.8	681.641	14636.3	21.4721	enriched
NTC	NTC	GATGGCCAGTAACGGCGTCA	215.258	250.749	6091.29	7709.18	233.004	6900.23	29.6143		KRAS CDE Neutral	ISL2	TCCACGACCAGTTTATCCTG	119.99	128.81	1628.28	3250.97	124.4	2439.62	19.6112	enriched
KRAS CDE Neutral	HAL	GTTCCTTTCTCTGGGACATA	535.487	490.988	16496.4	13611.3	513.238	15053.8	29.3311		KRAS CDE Neutral	C1orf87	GGCATTGCATCTGATCCACG	167.129	136.277	2398.64	3328.88	151.703	2863.76	18.8774	enriched
KRAS CDE Pos	MARVELD3	GCAGGAAGCGAAGCAGCGAC	133.54	187.687	4583.09	4693.68	160.613	4638.38	28.8792		KRAS CDE Neutral	NCALD	GCCTTGAGTGTAACTTCGAG	199.269	121.965	1964.38	3797.22	160.617	2880.8	17.9359	enriched
KRAS CDE Pos	GFI1	GCACGGCTTTGTGCTGCTCC	109.622	181.681	4357.25	4041.74	145.651	4199.5	28.8325		KRAS CDE Neg	KAT8	GTCTCGAGTGAACGACCAGG	282.833	271.931	4740.78	4870.03	277.382	4805.41	17.3241	enriched
KRAS CDE Pos	SCUBE2	ACAAGATGCACACAGATGGG	237.182	473.721	9923.72	10497.9	355.452	10210.8	28.7263		KRAS CDE Pos	GOLGA8O	GACGAAACAGAAGACCCGAA	259.264	56.0041	1669.23	3529.23	157.634	2599.23	16.489	enriched
KRAS CDE Neutral	DNAJC6	CCCAGGCATTACGGACAAAG	192.005	128.378	4841.63	4181.8	160.191	4511.71	28.1646		KRAS CDE Neutral	PCDHA6	GTCAGGAATAAGTTGTGTGC	190.698	425.009	6378.24	3584.03	307.854	4981.13	16.1802	enriched
KRAS CDE Neutral	PRDM9	TTTCCTGGTGACAGGTGTCG	126.231	276.275	3524.86	6666.83	201.253	5095.85	25.3206		KRAS CDE Pos	PRTN3	GTTCCCCCGCATCTGCAGGG	233.552	247.04	2362.62	4618.31	240.296	3490.47	14.5257	enriched
KRAS CDE Pos	GRPEL2	TAGCTGATTGTGAAAACATA	430.516	384.382	9124.45	10549.3	407.449	9836.88	24.1426		KRAS CDE Neutral	BASP1	AGGGGAACCCAAAAAGACTG	6.42803	0	0	93.3252	3.21401	46.6626	14.5185	enriched
KRAS CDE Pos	SERPINH1	GAAGGCGCTGAGAAGCAGGA	265.086	209.458	5013.27	6412.13	237.272	5712.7	24.0766		KRAS CDE Neg	CPEB1	TCAGACCCAAGGGGATCCAG	141.417	347.848	5287.31	1807.43	244.632	3547.37	14.5008	enriched
KRAS CDE Neg	IL11RA	GTACCGGATTAATGTGACTG	595.945	587.084	13233.9	14607.2	591.514	13920.5	23.5337		KRAS CDE Neutral	ZNF141	TCGTAGCCAGACCCCCAGGT	34.2828	67.205	649.616	672.969	50.7439	661.292	13.032	enriched
KRAS CDE Pos	INPP5F	TTCTAACTCTGCCTACTACG	436.495	563.81	14937.4	8248.95	500.153	11593.2	23.1793		KRAS CDE Pos	ASB18	GCCTCTGCACCTCTGCCGCA	473.532	408.83	6042.13	5156.86	441.181	5599.5	12.6921	enriched
KRAS CDE Neutral	TATDN1	TAATGAAAAGAAATAGAGAT	214.593	201.951	3784.25	5648.03	208.272	4716.14	22.6441		KRAS CDE Neutral	INS	GCACAGGTGTTGGTTCACAA	212.125	203.482	2095.72	3149.94	207.803	2622.83	12.6217	enriched
KRAS CDE Neutral	ALOX15B	GCTTCTCTGAGTTGATACAG	397.961	620.867	14186.8	8578.02	509.414	11382.4	22.3441		KRAS CDE Neutral	SAR1B	TTATTCCCAAGAATCAGTAT	424.25	270.687	4466.11	4251.01	347.468	4358.56	12.5438	enriched
KRAS CDE Neutral	ZNF195	CCTCACACCTCAGTGAACAC	143.505	72.0716	1977.52	2726.1	107.788	2351.81	21.8188		KRAS CDE Neutral	NAGPA	CCATTTGTGCAGCTGCTGAG	134.989	113.875	1134	1843.39	124.432	1488.69	11.9639	enriched
KRAS CDE Neg	C2orf16	ATAAATTACAGACCACTTCG	49.8282	66.8164	1301.71	1174.35	58.3223	1238.03	21.2274		KRAS CDE Pos	NPTXR	CCCCTGAGCCTGAAGGACAA	441.391	688.229	5424.29	7996.86	564.81	6710.57	11.8811	enriched
KRAS CDE Neutral	INHBB	CCAGGAAGTCGCCGTCCACT	136.197	108.107	3302.03	1693.05	122.152	2497.54	20.4461		KRAS CDE Pos	SCRG1	TAGCAGCAAAGTTAGCCCAA	419.965	697.563	5569.75	6740.82	558.764	6155.28	11.0159	enriched
KRAS CDE Neg	RIN2	ATAGTCTCCACACAAGCCCT	266.415	192.942	3443.56	5944.87	229.678	4694.21	20.4382		KRAS CDE Neg	RPAP1	CCAGGGTATTAAGAAGAGAG	25.7121	13.0676	199.121	219.186	19.3899	209.154	10.7867	enriched
KRAS CDE Pos	LOR	GTCCAGTGCCAGAGCTACGG	192.669	141.14	3510.23	3184.07	166.905	3347.15	20.0543		KRAS CDE Pos	TMEM246	GAGTCCTTCCCTGTACAGTG	128.561	356.56	2400.75	2756.09	242.56	2578.42	10.63	enriched
KRAS CDE Pos	TGOLN2	TAAAGTCACCCGGCGGCCAA	173.402	191.44	2942.83	4264.22	182.421	3603.53	19.7539		KRAS CDE Neutral	AKAP13	GCGTTTGGCTGCAATGAGCT	242.122	185.436	1615.57	2847.7	213.779	2231.63	10.439	enriched
KRAS CDE Neg	CFLAR	TGCCAATGCAATCGATTATC	237.847	89.3388	3253.42	3044.01	163.593	3148.71	19.2473		KRAS CDE Neg	CDC40	AGCAGGCTATGCTTGTCAGG	561.381	691.34	3776.95	9285.43	626.361	6531.19	10.4272	enriched
KRAS CDE Neg	HIST1H3E	CCTGGTGCGAGAAATAGCTC	164.101	106.606	3160.07	1978.11	135.353	2569.09	18.9806		KRAS CDE Neutral	CORT	GGCCGGTGGGGCCACCCTCC	265.692	246.418	4134.24	1171.27	256.055	2652.76	10.3601	enriched
KRAS CDE Neg	GRB10	AGATGGGACAAGCAAAGTGG	174.066	143.393	3815.23	2069.83	158.73	2942.53	18.538		KRAS CDE Neutral	NEK2	TTTCAGATCCCGATGCAATA	385.682	400.741	4494.35	3498.41	393.211	3996.38	10.1634	enriched
KRAS CDE Neg	MAP3K2	TCAACAGGCAACGTCAAACT	58.4651	111.11	1508.63	1528.82	84.7878	1518.72	17.9121		KRAS CDE Neg	XYLT1	AATGATTTCCTGATTCACCA	497.101	288.732	2776.4	5208.23	392.917	3992.32	10.1607	enriched
KRAS CDE Pos	PAPOLG	AAGTCTGATAGCCCTTCTGT	363.414	310.058	4893.68	6976.07	336.736	5934.87	17.6247		KRAS CDE Neutral	AKAP13	CAGCCCCATTGAGCAAGATG	179.985	185.436	1890.95	1712.39	182.71	1801.67	9.86078	enriched
NTC	NTC	TCCCGGGAGGTACGGTGTAC	59.1295	18.7687	672.364	673.624	38.9491	672.994	17.2788		KRAS CDE Neg	SPG21	TGTCACTGAAGGAATTGCAG	203.554	256.997	1751.14	2768.08	230.276	2259.61	9.81262	enriched
KRAS CDE Neg	ID1	CCGAGTTCAGCTCCAACTGA	593.288	698.945	11847	9798.84	646.116	10822.9	16.7508		KRAS CDE Neg	PKIG	AATGCGGTCCCTGACATCCA	368.54	500.926	3427.43	5036.14	434.733	4231.78	9.73421	enriched
KRAS CDE Pos	CREM	GCAGCCATCACCACTCCCTG	22.5888	68.3179	884.871	622.188	45.4533	753.53	16.5781		KRAS CDE Neg	WASF3	TGTGCTGAGGGAATCACAGG	203.554	230.862	1863.41	2263.78	217.208	2063.59	9.50054	enriched
KRAS CDE Pos	HOXA4	GGCCGCCTCGCAGCGCCGCG	186.69	129.128	2346.18	2819.06	157.909	2582.62	16.3551		KRAS CDE Pos	CDHR2	AGTTGGCACCACTCCCCGAC	355.684	217.172	2496.08	2902.5	286.428	2699.29	9.42397	enriched
KRAS CDE Pos	SLC28A1	AGCTGCTCCTGATCTCTGCG	307.606	388.136	5932.98	5429.27	347.871	5681.13	16.3311		NTC	NTC	TAATGGAAGATGCGCGATAC	81.4217	158.678	1220.15	845.92	120.05	1033.03	8.60503	enriched
KRAS CDE Neg	LTA4H	CACATGAAATATCTCATAGC	239.175	155.404	2833.14	3609.81	197.29	3221.47	16.3286		KRAS CDE Neg	STAT5A	GGATCAAGCGTGCTGACCGG	0	53.5151	117.213	339.909	26.7575	228.561	8.54194	enriched
KRAS CDE Pos	CCDC3	ATAGGAGTAGTCCTGGACCA	384.009	425.673	6490.49	6275.8	404.841	6383.14	15.767		KRAS CDE Neg	BCAR1	GGCACATCATAGATGTCCTG	23.5694	55.3819	444.139	215.761	39.4757	329.95	8.35832	enriched
KRAS CDE Neutral	HORMAD1	TCTTCACTAACACCAAAGAC	149.485	295.043	3403.55	3603.61	222.264	3503.58	15.7631		KRAS CDE Neg	CFLAR	TGCCAATGCAATCGATTATC	96.4204	66.5827	598.776	752.595	81.5016	675.686	8.29046	enriched
KRAS CDE Neutral	DNAJC6	GCCTTCTGTGGCGAGCTGAG	97.6633	83.3328	1755.98	1087.59	90.498	1421.78	15.7107		KRAS CDE Neg	RAF1	ATTGTATGAACTGATGACGG	272.12	282.51	1926.96	2587.42	277.315	2257.19	8.13944	enriched
KRAS CDE Neg	PELI2	GTAGATTTGCCCTCTACAAG	385.338	472.97	6810.97	6617.26	429.154	6714.11	15.645		KRAS CDE Pos	TSC22D4	CCCTTCCTCCCGTTTCCGGG	342.828	429.987	2654.95	3592.59	386.408	3123.77	8.08413	enriched
KRAS CDE Pos	FOXG1	CCTTGCCCGGGTCGTCGTAG	205.292	317.566	3327.41	4549.29	261.429	3938.35	15.0647		KRAS CDE Neutral	AFP	AATTGTAGGTGCATACAGGA	413.537	212.193	2643.65	2406.76	312.865	2525.21	8.07124	enriched
KRAS CDE Neg	MAP2K1	GAGTTGACTAGGATGTTGGA	250.47	219.218	3095.11	3979.15	234.844	3537.13	15.0616		KRAS CDE Pos	TGOLN2	GAAAAAGATCTAAAGTCACC	387.824	150.589	2729.09	1536.01	269.207	2132.55	7.92162	enriched
KRAS CDE Pos	ITGB4	CGTCTTCTGGAACATCTTGG	471.043	454.952	9141.66	4667.65	462.997	6904.66	14.9129		KRAS CDE Neg	SLC12A6	GAGTCAGAACTCCATCACAG	177.842	200.993	1185.55	1744.07	189.417	1464.81	7.73323	enriched
KRAS CDE Pos	CNR2	TACAAAGCTCTGCTCACCCG	44.5132	265.764	2129.8	2457.77	155.139	2293.78	14.7854		KRAS CDE Pos	GPN3	GCAGCTGGTCATGGGCCCCG	10.7134	19.2903	0.706104	226.035	15.0018	113.371	7.55712	enriched
KRAS CDE Neg	SPG21	TGAAGGAATTGCAGAGGATT	403.276	515.763	6376.92	7163.22	459.519	6770.07	14.7329		KRAS CDE Neutral	BASP1	AGCGCCTAGTTCCACACCCA	415.679	344.114	2969.17	2762.94	379.897	2866.05	7.54429	enriched
KRAS CDE Neg	OR1A1	AATACAAAGAGACAACCGTG	365.407	232.731	5089.84	3689.75	299.069	4389.79	14.6782		KRAS CDE Neg	ABCD4	GTATGATGTTCTGTCCCCGG	389.967	383.94	2529.97	3259.53	386.953	2894.75	7.48088	enriched
KRAS CDE Pos	NPTXR	GGCAGCTGAGAGGTTCACAC	205.292	144.143	1945.68	3133.25	174.718	2539.47	14.5347		KRAS CDE Neutral	CXCR5	GAAGCCCTCGATCTTGTCAG	222.838	270.064	2489.02	1172.13	246.451	1830.57	7.42773	enriched
KRAS CDE Pos	ZNF408	AGGGCGAGGGAGTAAAGCCA	182.039	175.675	3714.14	1471.19	178.857	2592.66	14.4957		KRAS CDE Pos	C5orf46	GAGTCGTCTGGCTTGTCGTC	53.5669	95.207	442.727	653.276	74.387	548.002	7.3669	enriched
KRAS CDE Neutral	U2SURP	AAGATGAGTGTACTCCGACA	244.49	286.034	2893.36	4777.34	265.262	3835.35	14.4587		KRAS CDE Neg	SLC2A13	TACCAAAGGTAAGCTTTCTG	419.965	291.222	2068.88	3044.63	355.593	2556.76	7.19012	enriched
KRAS CDE Neg	RCBTB2	TATCAAGCAAGGCATCTGCG	110.951	111.11	1607.57	1556.09	111.031	1581.83	14.2468		KRAS CDE Neg	FAR2	AGTTATCTATCCGTGCCCTG	344.971	356.56	2272.95	2709	350.765	2490.97	7.10154	enriched
KRAS CDE Neg	GABPA	GACCAAGGAGTAAAAACAGA	292.99	307.806	4512.11	3956.22	300.398	4234.17	14.0952		KRAS CDE Neg	ZFP3	TACAGTGAACACTTTGATGT	265.692	512.749	2541.27	2681.6	389.22	2611.43	6.7094	enriched
KRAS CDE Neutral	ISL2	CTGGGGACGAGTTCTCGCTG	69.7595	168.167	1344.3	1914.9	118.963	1629.6	13.6983		KRAS CDE Pos	C5orf46	GACGACAAGCCAGACGACTC	2.14268	30.4911	105.916	113.018	16.3169	109.467	6.70878	enriched
KRAS CDE Pos	CNRIP1	CTTCACCTCAACCTTGTAGG	101.65	69.0687	1189.87	1114.86	85.3591	1152.36	13.5002		KRAS CDE Neutral	MS4A1	ATGGGTGCATAGATCCCTGC	229.266	362.16	1762.44	2107.95	295.713	1935.19	6.54415	enriched
KRAS CDE Pos	KIF17	GCTACAGGCTCATGCTCAGT	18.6025	30.7806	179.813	475.937	24.6916	327.875	13.2788		KRAS CDE Neutral	SLC6A6	CATCCGCCTCTGCCAGACTG	304.26	492.214	2867.49	2333.13	398.237	2600.31	6.52955	enriched
KRAS CDE Neutral	PFDN6	AAGTTTCTGCCTCCCCGACA	125.567	140.39	1882.88	1566.01	132.978	1724.44	12.9678		KRAS CDE Neg	SPG21	TCTGCAGTTCCACTGACAGG	51.4242	108.897	354.464	680.675	80.1606	517.569	6.45666	enriched
KRAS CDE Neg	MGAT2	GTGAGTCCAGCAGCAGTCTG	308.27	204.203	2559.11	4047.94	256.237	3303.53	12.8925		KRAS CDE Neutral	UBN1	AGCGCCTCTCCCACACGCTG	175.699	204.104	850.855	1529.16	189.902	1190.01	6.26645	enriched
KRAS CDE Pos	DEGS1	CAGGATCTCCCGGCGCCGGT	291.661	168.167	2793.13	3126.43	229.914	2959.78	12.8734		KRAS CDE Neg	ARID3B	GGTTGCCATCAATTGCTGCC	462.818	297.444	2990.35	1721.81	380.131	2356.08	6.19807	enriched
KRAS CDE Neutral	OTUD4	ACAGGAATGGGTAGGACAAG	308.935	153.152	2210.67	3693.47	231.044	2952.07	12.7771		KRAS CDE Neg	TAF13	CTGACTCAGTATAAGGATTC	0	39.8252	84.7325	161.821	19.9126	123.277	6.19089	enriched
KRAS CDE Neg	OR1A1	AGAAGATGTCAACCAAGGAG	218.58	240.239	3682.73	2167.12	229.409	2924.93	12.7498		KRAS CDE Neutral	NLGN1	GTTTGAGTGAAGATCCGCTG	323.544	187.303	1230.74	1852.8	255.423	1541.77	6.03614	enriched
KRAS CDE Pos	CCSER2	TAGCTTTCAAAATGACCCAA	227.217	163.663	2430.92	2400.75	195.44	2415.84	12.361		KRAS CDE Neutral	FAM105A	AGGGCACAAGCTGAAATGGT	355.684	292.466	1165.78	2739.82	324.075	1952.8	6.02576	enriched
KRAS CDE Neutral	UBTD2	GGGCAGCCTCAACGAGAACT	148.82	77.3269	1338.71	1453.84	113.074	1396.27	12.3484		KRAS CDE Neg	LTF	GGACCCGTCCAATTCAAGAA	179.985	226.506	910.874	1522.31	203.245	1216.59	5.98584	enriched
KRAS CDE Pos	MAP2K2	GCTCCCCTGCAGGTTCTCCG	247.812	328.076	4461.35	2540.81	287.944	3501.08	12.1589		KRAS CDE Neutral	IAPP	GATCCAATACATATGGCAAG	98.5631	232.106	388.357	1571.97	165.335	980.165	5.92837	enriched
KRAS CDE Neutral	RBCK1	CCTTCATCAACAAGCCCACG	458.419	391.89	5009.4	5134.91	425.154	5072.15	11.9301		KRAS CDE Neg	LENG8	GTAGGAGTCGTCATACATGG	681.371	481.636	3322.93	3571.19	581.503	3447.06	5.92784	enriched
KRAS CDE Neutral	C2orf71	AGAACGAACATTTCAGTACC	457.091	380.628	4518.99	5436.71	418.859	4977.85	11.8843		KRAS CDE Pos	LGALS2	CAATGAGTTGCAGACAATGG	164.986	67.205	442.021	903.285	116.096	672.653	5.79396	enriched
KRAS CDE Pos	RXFP3	CACAAGATAATGATGCCCAG	181.375	183.933	2383.17	1865.32	182.654	2124.25	11.6299		KRAS CDE Pos	TCF12	GTTGGTGAAACTGAGTGTGG	175.699	91.4734	582.536	963.219	133.586	772.877	5.7856	enriched
KRAS CDE Pos	EZH2	CATCTGACGTGGCAGGCTGG	209.278	177.176	2016.66	2439.18	193.227	2227.92	11.53		KRAS CDE Neutral	APEH	AAAGCCCATCTTGCAAAGCA	302.117	380.206	1277.34	2506.08	341.162	1891.71	5.54491	enriched
KRAS CDE Neutral	GOLGB1	TATCGCAGAGCTGAATGGAA	182.039	142.642	1469.48	2247.69	162.34	1858.58	11.4487		KRAS CDE Neutral	KIF3B	GGATGAAGATGAGATACAGG	319.259	601.111	1833.05	3253.54	460.185	2543.29	5.52667	enriched
KRAS CDE Neutral	ABCF3	TGCCCAGGCGTCTTGCACAG	40.5269	123.873	1056.08	824.833	82.2	940.457	11.4411		KRAS CDE Pos	BTNL9	AGCATCATCCCCTCTGACAA	535.669	273.176	2054.06	2225.25	404.422	2139.65	5.29064	enriched
KRAS CDE Neutral	MOK	ACACGTACAAGATGGACCTG	422.543	386.634	5055.42	4017.57	404.589	4536.5	11.2126		KRAS CDE Pos	PTGIR	GCTGCCATCTTCCTCTGCAA	497.101	337.892	2157.15	2150.76	417.496	2153.95	5.15922	enriched
KRAS CDE Neg	CCR2	CCACTCCAAAAACCAGTGTG	104.971	153.903	804.859	2063.01	129.437	1433.94	11.0782		KRAS CDE Neg	P2RY12	TGTGAAATAAAATATGACGG	222.838	86.4953	571.238	1019.73	154.667	795.483	5.1432	enriched
KRAS CDE Neutral	NLGN1	CCAAAGTTGGTAGCCACCAG	322.887	373.121	4960.36	2682.1	348.004	3821.23	10.9804		KRAS CDE Neutral	DCAKD	TCTTGGTCTCAAACAGCAGG	2.14268	74.0499	9.17935	379.294	38.0963	194.237	5.09857	enriched
KRAS CDE Neutral	WFDC9	TCTGGAACAAAGATCCCTGT	215.922	72.0716	1748.23	1375.75	143.997	1561.99	10.8474		KRAS CDE Neg	LZTFL1	AACAGCAGAACTCCTAAACA	374.968	516.483	1583.79	2804.04	445.726	2193.91	4.92212	enriched
KRAS CDE Neutral	TATDN1	ACTCCTTTAAGTAAAGATCA	409.256	346.845	3316.65	4851.08	378.05	4083.87	10.8025		KRAS CDE Pos	IL36RN	GCAGCCCTCCAGCTAGAAGC	304.26	469.813	1373.37	2394.78	387.036	1884.07	4.86795	enriched
KRAS CDE Neg	IL11RA	GTAGGAGGTGAGGTAGCGGG	59.1295	51.0507	693.443	483.373	55.0901	588.408	10.6808		KRAS CDE Neg	IYD	CTGGACCTTCGTGGTTGTGA	139.274	393.274	1126.94	1433.27	266.274	1280.11	4.80748	enriched
KRAS CDE Pos	SCRG1	GGAATCACGAAAGAGATCTT	150.813	351.349	3212.98	2094.62	251.081	2653.8	10.5695		KRAS CDE Neutral	ELF2	AAGATAAAAATACTTGTCCC	269.977	308.023	691.982	2048.87	289	1370.43	4.74196	enriched
KRAS CDE Neg	DUSP11	TGATTGATGTAGAAGGCGTG	125.567	127.627	759.26	1906.23	126.597	1332.74	10.5274		KRAS CDE Neg	ID1	GTGCTGCTCTACGACATGAA	722.082	470.435	2944.45	2485.53	596.258	2714.99	4.55338	enriched
KRAS CDE Neg	TTBK1	GCCTGCATGCTGCGTCCCCG	11.2944	24.0239	169.059	202.645	17.6591	185.852	10.5244		KRAS CDE Pos	PRMT8	GTAATCTTCCAAGTAGAAGA	38.5682	131.299	467.441	282.544	84.9334	374.993	4.41514	enriched
KRAS CDE Neg	PIEZO1	GTACTGGCTGATGAACTGCA	177.388	114.864	1553.79	1515.19	146.126	1534.49	10.5011		KRAS CDE Pos	ALPP	TCCATGGCCAGGGGTATCTC	432.821	260.108	749.882	2229.53	346.464	1489.71	4.29974	enriched
KRAS CDE Pos	FEM1B	GGGGGTTGAATTAGTTACTG	181.375	230.479	2284.23	1973.15	205.927	2128.69	10.3371		KRAS CDE Neutral	ZNF705A	CTAATTGCTTTCGCCTTAGA	177.842	90.2289	468.147	673.825	134.036	570.986	4.25996	enriched
KRAS CDE Neg	MAP2K1	AATCCGGAACCAGATCATAA	366.071	328.827	3931.81	3180.97	347.449	3556.39	10.2357		KRAS CDE Pos	PXDNL	GCAGGGTGTACAGATGTTAG	338.543	362.16	1061.27	1875.92	350.352	1468.6	4.19178	enriched
KRAS CDE Neutral	DNAH9	TGGCAGTCAGGAACGACTGG	157.457	45.0448	1031.99	1029.96	101.251	1030.97	10.1824		KRAS CDE Pos	PPTC7	CAGCAACTCACAGTAGCTTG	199.269	209.082	857.916	830.509	204.176	844.212	4.13474	enriched
KRAS CDE Neg	EXOC5	CAGCTTGCTGGAAAGATTGG	104.971	102.852	1175.24	940.099	103.912	1057.67	10.1785		KRAS CDE Pos	EN1	GCTACATCACGGAGCAGCGG	102.848	51.6483	185.705	430.666	77.2484	308.186	3.98954	enriched
KRAS CDE Neutral	CROT	ATGATCGCATAGTCTCTGTA	179.381	222.972	2090.65	1956.42	201.177	2023.54	10.0585		KRAS CDE Pos	PTGIR	AGGCGTAGAAGCGGAAGGCA	394.252	594.888	824.023	3091.72	494.57	1957.87	3.95873	enriched
KRAS CDE Pos	TCF3	GATAGAAGACCACCTGGACG	407.262	440.688	3549.38	4938.46	423.975	4243.92	10.0098		KRAS CDE Pos	ITGB4	GCCAGCCACCGCATTCCGGG	113.562	138.766	411.659	582.212	126.164	496.935	3.93881	enriched
KRAS CDE Neg	WDR93	CCTGGATTTCTCCAAGTGGA	105.636	165.915	998.007	1665.78	135.775	1331.89	9.80953		KRAS CDE Neg	SPACA7	AATACCATTCAGTTCAAAAC	154.273	102.674	463.91	543.683	128.473	503.797	3.92141	enriched
KRAS CDE Pos	DEF6	GCTGGATGCACACTGCTGCG	299.634	168.167	2472.65	2109.49	233.9	2291.07	9.79507		KRAS CDE Neutral	SLC22A8	TATCCGGAACAGGTCACTTG	370.683	417.542	1293.58	1696.12	394.113	1494.85	3.79296	enriched
NTC	NTC	TATCGAACTGCACACGCAAC	11.2944	27.0269	0.860351	361.91	19.1606	181.385	9.46656		KRAS CDE Neg	DCAF6	GTATTCAGGAGTTCTTCAGA	392.11	509.015	1210.26	2202.13	450.563	1706.2	3.78681	enriched
KRAS CDE Neg	LENG8	AGGGCGCACGGTGGACGGGT	93.0126	100.6	1023.39	805.622	96.8063	914.505	9.44675		KRAS CDE Neutral	TSPAN8	GTGGACATATTGATTGCTGT	55.7096	27.3798	225.247	86.4756	41.5447	155.861	3.75166	enriched
KRAS CDE Pos	B3GAT1	GCACCGAGTACGTGTACACG	210.607	274.773	2091.51	2401.37	242.69	2246.44	9.25643		KRAS CDE Neg	TCF7L2	ATAAAGCCAAGAGTGTCAGA	51.4242	269.442	468.147	724.34	160.433	596.244	3.71646	enriched
KRAS CDE Pos	BTNL9	AGCATCATCCCCTCTGACAA	760.71	387.385	6767.95	3790.14	574.048	5279.05	9.19618		KRAS CDE Neg	SCN5A	CGGAGAATTGTACTGGACCA	62.1376	186.68	473.796	443.509	124.409	458.652	3.68665	enriched
KRAS CDE Neg	DIRAS2	AACACCGCCAGCCCCAAACA	286.346	554.051	3027.58	4672.61	420.198	3850.09	9.16256		KRAS CDE Pos	PEAK1	CAGAGACAAGCACTTTATCG	353.542	446.166	1189.79	1738.07	399.854	1463.93	3.66116	enriched
KRAS CDE Pos	AGFG1	CCAACACTGCACTTAAATAA	293.654	151.651	2169.81	1852.31	222.652	2011.06	9.03228		KRAS CDE Neg	PELI2	TAGTAGTGAGCCCATCCATG	102.848	188.547	454.731	609.61	145.698	532.171	3.65256	enriched
KRAS CDE Neutral	ITGBL1	GGCCACGGCACATGTTCCTG	111.615	179.428	1503.89	1118.58	145.522	1311.23	9.01057		KRAS CDE Pos	FZD9	CACAGAGCAGCCATGCGCAG	38.5682	0.622268	141.927	0	19.5952	70.9635	3.62147	enriched
KRAS CDE Pos	CCDC7	TGAAGAATCGCCTTAAACAG	283.024	222.221	2244.23	2287.35	252.623	2265.79	8.96906		KRAS CDE Neutral	SLC6A12	AGACCACTTCAAACAATGAC	432.821	802.726	1717.24	2607.11	617.773	2162.18	3.49995	enriched
KRAS CDE Pos	RCN2	GTTAGTTTGGAAGAATTTCT	45.8419	174.173	1069.85	902.297	110.008	986.072	8.96367		KRAS CDE Neg	REV3L	TCCTCGCGAAGTGAACCTGA	124.275	186.058	708.928	369.02	155.167	538.974	3.47352	enriched
KRAS CDE Neutral	MPC2	AATTTCTTTGTGGGGGCAGC	20.5957	14.2642	135.505	161.124	17.4299	148.315	8.50921		KRAS CDE Neutral	FILIP1L	GAGTAAAGACTTTAAACTAG	239.98	202.859	560.647	972.637	221.42	766.642	3.46239	enriched
KRAS CDE Neg	MAP2K1	TATGGTGCGTTCTACAGCGA	313.585	311.56	3218.57	2095.24	312.573	2656.91	8.50012		KRAS CDE Neutral	IMPACT	GAATGTGAAGAATGTCATGG	207.84	90.8512	1004.79	15.4115	149.345	510.099	3.41556	enriched
KRAS CDE Neutral	SMOX	GCCGAGCGCAAGATTCGCCG	14.6163	34.5343	112.276	303.658	24.5753	207.967	8.46243		KRAS CDE Pos	CDCA4	TGCACGGCACAGGATCTCCG	115.705	228.372	276.793	898.148	172.038	587.47	3.41476	enriched
KRAS CDE Neg	DUSP11	AGCCTGTTAAACAAGGACCT	90.3551	187.687	1466.47	853.34	139.021	1159.9	8.34338		KRAS CDE Neg	NR1H2	TCACCCACTGTAAAGGAGGA	317.116	377.717	1091.64	1253.47	347.416	1172.55	3.37506	enriched
KRAS CDE Pos	KIF17	GCTGCTTCGCGAGTACCAGG	144.17	168.167	983.812	1619.3	156.168	1301.56	8.33431		NTC	NTC	TGTGCCACGCCGCTGCAACG	66.423	85.873	115.801	398.13	76.148	256.966	3.37456	enriched
KRAS CDE Neg	ZMYND15	GTCACTGAAGATCCACGTGG	195.327	201.951	1474.64	1817.61	198.639	1646.12	8.28703		KRAS CDE Neutral	CLEC3A	GACAGAAGTCAATGCCTTGA	154.273	241.44	496.391	821.947	197.856	659.169	3.33155	enriched
KRAS CDE Neutral	CLEC3A	CAGGGCTTGAATTTCCTTCA	140.848	263.512	1352.04	1944.03	202.18	1648.03	8.15133		KRAS CDE Pos	SCUBE2	CTGCAAGCCTGGCTACCAAG	306.403	160.545	1100.82	431.522	233.474	766.169	3.2816	enriched
KRAS CDE Neg	PGBD1	TGGAGGTTCACACTTCAGGG	162.772	62.3119	605.257	1220.21	112.542	912.732	8.11015		KRAS CDE Neg	CSGALNACT2	TTCCTGGTTGGCATAAACAA	437.106	391.407	999.137	1711.53	414.256	1355.33	3.27173	enriched
KRAS CDE Neutral	CSN3	AAATAGCCACCCACCCACTG	393.311	424.172	3543.79	2999.39	408.741	3271.59	8.00406		KRAS CDE Neutral	AT5L2	CGTGGTGTAGTACCAAAATG	336.4	233.351	419.426	1392.17	284.875	905.799	3.17963	enriched
KRAS CDE Neg	C10orf99	AGAGAAGCAGGATACAGAGC	469.714	564.561	3601.86	4652.16	517.137	4127.01	7.98049		KRAS CDE Pos	NKD2	GCAAACCGCGAGGGCCCGCG	87.8497	82.1394	345.285	191.788	84.9946	268.536	3.15945	enriched
KRAS CDE Pos	CR1	GCTATCCATTTACATTCTCA	581.993	336.334	3364.4	3891.77	459.164	3628.09	7.90151		KRAS CDE Neg	TTC26	GGATATTGTGCCTTTCACCT	404.966	329.18	852.268	1440.98	367.073	1146.62	3.12369	enriched
KRAS CDE Neutral	DEFA6	AGCTGAGGATGATCCACTGC	60.4582	69.8194	468.891	550.922	65.1388	509.906	7.828		KRAS CDE Neutral	UGT2B4	TTAAGAGTAGATGGGCTGTT	203.554	292.466	540.17	1003.46	248.01	771.815	3.11203	enriched
KRAS CDE Pos	JAM3	CAATGATGTACCACTGCCCA	212.6	262.01	1626.92	2085.32	237.305	1856.12	7.82166		KRAS CDE Pos	SIAH2	GGTGCCAATGAGCAGGACGA	29.9975	47.2924	0	239.734	38.6449	119.867	3.10176	enriched
KRAS CDE Neg	MMAB	GGGAGAGACCGATGCGAACG	231.203	235.734	2467.49	1183.02	233.469	1825.26	7.818		KRAS CDE Neutral	CABLES2	GCGGGAGATGCGGAGCCTGT	42.8535	100.807	230.896	207.199	71.8305	219.048	3.04951	enriched
KRAS CDE Neutral	GNPNAT1	TCTAGGACAGATTGTTGCTA	245.819	143.393	1587.78	1435.25	194.606	1511.51	7.76705		KRAS CDE Pos	FZD9	TCTGCGCTCCGGCCACCGCA	119.99	233.973	562.059	517.141	176.981	539.6	3.04891	enriched
KRAS CDE Neg	MAP3K2	CTGTATCAACATCATAACAG	393.975	265.013	3142	1950.84	329.494	2546.42	7.72828		KRAS CDE Neg	IGFL2	CAGCACACTCCTGGGGTAGT	38.5682	46.6701	5.64883	249.153	42.6191	127.401	2.98928	enriched
KRAS CDE Neutral	ACOX3	TCAGTGCTCTGTACGCCCTG	164.765	278.527	2092.37	1326.8	221.646	1709.59	7.71314		KRAS CDE Neutral	PCDH9	GATCACAACAATGACCACCA	237.837	339.758	1028.09	689.237	288.798	858.662	2.97323	enriched
KRAS CDE Neg	PRH2	GCTGGCCTTCAGCTCAGCTC	214.593	99.8493	1159.32	1251.81	157.221	1205.57	7.66797		KRAS CDE Pos	ZIC1	GACTTTCTGTTCCGCAACCG	0	17.4235	22.5953	29.1106	8.71176	25.853	2.9676	enriched
KRAS CDE Neg	HIST1H3E	TCGCAAGAGCGCTCCGGCCA	125.567	111.861	1153.3	662.469	118.714	907.885	7.64766		KRAS CDE Pos	GIPC1	CTGCTCAAGGAGCTGCCCCG	115.705	89.6066	387.651	220.042	102.656	303.847	2.95986	enriched
KRAS CDE Pos	PTGIR	GCCCGTCCAGCTGCGCGTAG	77.0676	135.134	740.332	879.987	106.101	810.16	7.63574		KRAS CDE Pos	GH1	CAACGTCTATGACCTCCTAA	569.952	614.801	1122.71	2343.4	592.376	1733.05	2.9256	enriched
KRAS CDE Neg	ZBTB2	AGATGGACTCAAATTTGCCG	96.3345	167.416	856.48	1156.38	131.875	1006.43	7.63166		KRAS CDE Neg	TAF6	GTTGTGCCTGCGACCAGATG	477.817	465.457	504.158	2252.65	471.637	1378.4	2.92259	enriched
KRAS CDE Pos	ZNF408	GGTGAGACTTGGGCCCTCAG	62.4513	219.218	1503.03	638.301	140.835	1070.67	7.6023		KRAS CDE Neg	MGAT2	GACTCTTACCCGAATCACAG	263.549	286.243	336.105	1242.34	274.896	789.222	2.87098	enriched
KRAS CDE Neutral	HSF2BP	CAGCATCACTGGTCAAACAA	277.709	322.07	2103.13	2451.57	299.89	2277.35	7.59396		KRAS CDE Neutral	SLC35G3	CTTTCTCGTATGGCTTACCA	449.962	364.649	904.519	1418.71	407.306	1161.62	2.85195	enriched
KRAS CDE Neutral	RGMA	AGGGGCAGGACGTTCAGCCC	244.49	219.969	1770.17	1739.52	232.229	1754.85	7.55653		KRAS CDE Neutral	VGLL2	CGCGTAGACTTCGTGCACGG	227.124	196.637	706.104	479.469	211.88	592.786	2.79774	enriched
KRAS CDE Pos	CCDC7	GTTGACCACCAGTAACAAAT	121.581	156.155	1020.38	1046.69	138.868	1033.53	7.44255		KRAS CDE Pos	FRMD3	ACGAAGCCTCCAATTGCACA	415.679	314.245	425.075	1609.65	364.962	1017.36	2.78758	enriched
KRAS CDE Pos	RBP1	GCTGGAGACTGCCGGGACAG	100.321	17.2672	326.073	541.006	58.794	433.54	7.37388		KRAS CDE Neutral	IKZF3	CAAGCAGAGAAGTTCCCTTG	229.266	239.573	667.974	620.741	234.42	644.358	2.74873	enriched
KRAS CDE Neutral	ABCF3	GCGAGAGGATTTGCTACGGA	263.757	69.8194	1834.27	605.456	166.788	1219.86	7.31384		KRAS CDE Pos	DEF6	GCACATCCCCCATGACCCCG	353.542	452.389	912.992	1289.43	402.965	1101.21	2.73277	enriched
KRAS CDE Pos	C5orf52	AGCCGCAGATCTGCTTTCCG	305.613	147.146	2087.21	1203.48	226.38	1645.34	7.26807		KRAS CDE Neutral	NOSTRIN	AGAGGGAATGAAATCCACAG	47.1389	215.927	351.64	357.889	131.533	354.765	2.69715	enriched
NTC	NTC	CGTCACCGCTAGTAATGATG	192.669	77.3269	1262.57	659.371	134.998	960.968	7.11839		KRAS CDE Pos	SERPINH1	CGACACGAGCCCTAGCGACG	201.412	50.4037	502.04	174.664	125.908	338.352	2.6873	enriched
KRAS CDE Neutral	ZCCHC6	CATAAGCTGCACACTACCGT	292.99	236.485	1820.5	1944.03	264.737	1882.27	7.10993		KRAS CDE Neg	C3orf56	GGAACCATAGGCAGAGCCCA	1120.62	548.218	1245.57	3229.57	834.419	2237.57	2.68159	enriched
KRAS CDE Pos	SIAH2	GGTCAGCTCGTGGTGCTGCG	201.306	221.47	2070.01	919.029	211.388	1494.52	7.07002		KRAS CDE Neg	OR5C1	AGAGAACCTCACCCGGGCCG	434.963	454.256	1319	1059.11	444.61	1189.06	2.67439	enriched
KRAS CDE Neutral	EMILIN3	ACACGACGGGATGGCGCCCG	104.307	171.17	810.881	1134.07	137.739	972.474	7.06029		KRAS CDE Pos	C5orf52	CGCCCAGAAATCGGCGTAGG	237.837	266.953	521.105	822.803	252.395	671.954	2.66231	enriched
KRAS CDE Neg	RAP1B	GTCAAAATCTAGCAAGACAA	165.43	94.594	634.509	1160.72	130.012	897.612	6.90408		KRAS CDE Neg	C10orf99	GGCAGGACGCCTCTTCCCTG	117.847	316.112	571.944	578.787	216.98	575.366	2.6517	enriched
KRAS CDE Neg	XYLT1	CAGGACAAATGACCAGTTGG	224.559	258.257	1989.56	1332.99	241.408	1661.28	6.88162		KRAS CDE Neutral	MS4A1	TGAAGCATATGAAGAAGACA	254.979	219.661	511.925	746.602	237.32	629.263	2.65154	enriched
KRAS CDE Neg	LTF	GTAATGCCTGCGACATACTG	138.855	260.509	1028.98	1696.76	199.682	1362.87	6.82522		KRAS CDE Pos	TRIM24	ACAAGAAAGATGGAATACTT	137.131	73.4277	203.358	353.608	105.279	278.483	2.64518	enriched
KRAS CDE Neutral	TSPAN8	GTACCCATATTGCTAATGCT	340.825	437.685	2580.19	2667.85	389.255	2624.02	6.74114		KRAS CDE Neg	POLR3F	ACTTGGTCTGTGATTCCATG	295.689	278.776	856.504	657.557	287.233	757.031	2.6356	enriched
KRAS CDE Neg	DIRAS2	CAAGCTCAACCATAACGTGA	451.111	363.361	3052.53	2395.18	407.236	2723.85	6.68863		KRAS CDE Neutral	ZNF195	CATTGAGGCCTGGCTGGGCA	409.251	384.562	1029.5	1059.97	396.906	1044.73	2.63219	enriched
KRAS CDE Pos	PRTN3	AACCCGGGCAGCCACTTCTG	211.936	340.839	2328.11	1368.32	276.387	1848.21	6.68704		KRAS CDE Pos	BTNL9	GCAGACACAATACCTGAGCT	207.84	225.261	363.644	766.294	216.55	564.969	2.60895	enriched
KRAS CDE Pos	ADPRHL2	GGCTAGCAGGGACTGCACCA	236.518	192.191	1672.95	1181.79	214.354	1427.37	6.65892		KRAS CDE Pos	FRMD3	GCTCAAACTCTGGTGTCTGG	272.12	351.582	504.864	1118.19	311.851	811.527	2.60229	enriched
KRAS CDE Neg	CPEB1	ACAAGTCATTTGCATCTGGG	158.121	123.122	1147.28	723.82	140.622	935.549	6.65294		KRAS CDE Pos	EMB	TTCGAGAGGAAAAGGAACAA	117.847	212.816	592.421	261.995	165.331	427.208	2.58395	enriched
KRAS CDE Neg	PANK3	TTGGCATCGCTCAGGTTCTG	271.065	155.404	1460.88	1362.74	213.235	1411.81	6.62091		KRAS CDE Neutral	PCARE	ATAGGTGTAAGCCTGCTGGT	257.121	126.943	165.228	822.803	192.032	494.016	2.57257	enriched
KRAS CDE Neg	HSF2	TTATGATGATGATTATCAGT	265.086	335.584	1853.63	2085.94	300.335	1969.78	6.55863		KRAS CDE Neg	SLC1A3	CAGGAAGAGAATACCCACGG	19.2841	52.2705	165.934	17.9801	35.7773	91.9573	2.57027	enriched
KRAS CDE Pos	NAGK	CGCGGGGAGGATCCTGATCG	144.17	159.909	993.706	998.352	152.039	996.029	6.55113		KRAS CDE Neutral	XCL2	AATACAGCTGTGACCCTGAC	182.128	232.728	546.524	519.71	207.428	533.117	2.57013	enriched
KRAS CDE Pos	CDK7	AGCTCCAAATAGTAACTCGG	253.792	210.96	1411.84	1627.98	232.376	1519.91	6.54073		KRAS CDE Neg	OLA1	ACTAAGGCTCCTCAGGCTGC	167.129	133.165	566.295	203.774	150.147	385.035	2.56438	enriched
KRAS CDE Neutral	LYZ	TGAAGGCTCTCATTGTTCTG	72.417	172.672	860.351	698.412	122.544	779.382	6.36		KRAS CDE Pos	LMO4	GAGGGAGCCGGCCGTCACCG	0	69.694	0.706104	177.232	34.847	88.9692	2.55314	enriched
KRAS CDE Neg	TESK1	AACAAGCTCCCCAGTAACCG	8.63689	90.8403	150.131	475.317	49.7386	312.724	6.28735		KRAS CDE Neg	NARS	AATGCTAAATCTTACCCCAA	164.986	169.257	258.434	585.637	167.122	422.036	2.52532	enriched
KRAS CDE Neg	HSP90B1	GTACCCACATCTGCTCCACG	182.039	368.616	1747.37	1709.16	275.328	1728.27	6.27712		NTC	NTC	ACCAGGACTGCCGCGTGAGG	149.987	224.017	382.708	553.102	187.002	467.905	2.50214	enriched
KRAS CDE Neutral	GPR150	GTGCTGTGCCGCCTGTGCGG	33.2188	44.294	261.117	223.715	38.7564	242.416	6.25486		KRAS CDE Neg	ACRBP	CAATCCTCCTTGTCCCTGGG	567.809	433.721	1206.03	1246.62	500.765	1226.32	2.4489	enriched
KRAS CDE Pos	CAPN2	TGTCTTTCAGTGACTTCCTG	417.892	409.907	2082.48	3070.04	413.9	2576.26	6.22435		KRAS CDE Neg	IGSF10	GAGAGCCCCTTATGTCAGTG	134.989	142.499	234.427	439.228	138.744	336.827	2.42769	enriched
KRAS CDE Neutral	SLC27A3	CCATCAACTACACAGGACAG	158.786	259.758	1203.63	1400.54	209.272	1302.09	6.22198		KRAS CDE Pos	ADPRHL2	AAAGGCTCCTATGGCAATGG	2.14268	94.5848	168.759	65.927	48.3637	117.343	2.42626	enriched
KRAS CDE Neg	NANOG	GATGGGGACTGAGAACAAGG	441.146	418.166	2950.14	2349.94	429.656	2650.04	6.16783		KRAS CDE Neutral	ZBBX	AGAACACTGTGCATCACCAG	197.126	165.523	225.953	645.571	181.325	435.762	2.40321	enriched
KRAS CDE Pos	LBH	GATGAACACCCAGCCCATGG	259.107	382.881	2487.71	1437.73	320.994	1962.72	6.1145		KRAS CDE Neg	LIG4	TCTGCAATAGCAGCTAGCAT	143.559	184.191	276.087	511.148	163.875	393.617	2.40193	enriched
KRAS CDE Pos	INPP5F	CTTTGGCTTACCAAAAAGAG	91.6839	22.5224	407.806	289.404	57.1031	348.605	6.10484		KRAS CDE Neutral	C14orf93	GCATGTCCCTCTGAGTTGCT	137.131	161.167	139.809	575.363	149.149	357.586	2.3975	enriched
KRAS CDE Pos	C5orf52	TGCTGCGCGGACCTCGGCCG	84.3757	239.488	1036.29	932.662	161.932	984.478	6.07958		KRAS CDE Neutral	NEK2	AGTGATGACTCAGTTGACTC	224.981	240.196	409.54	703.792	232.588	556.666	2.39335	enriched
KRAS CDE Neg	ZBTB3	TGCTTAGGGAGTTCTCGAAG	81.7182	168.918	868.094	626.526	125.318	747.31	5.96331		KRAS CDE Neg	PKIG	TGTCAGGGACCGCATTCCGA	587.093	397.007	1161.54	1184.12	492.05	1172.83	2.38356	enriched
KRAS CDE Neg	TCF7L2	ATAGAGATATACTCACGCCA	234.525	436.184	1336.99	2639.96	335.354	1988.47	5.92947		KRAS CDE Neutral	ELOVL3	GCAAGGGCTTCAACCTGCAA	10.7134	102.674	218.186	49.6593	56.6938	133.923	2.36221	enriched
KRAS CDE Neg	IGFL2	CTGAGCGAGACCCGCCAATG	51.1569	6.75672	104.533	238.588	28.9568	171.56	5.92469		KRAS CDE Pos	SIAE	TTTCAGCTCACTCTGATACG	34.2828	95.207	0	301.38	64.7449	150.69	2.32744	enriched
KRAS CDE Neutral	ARID3C	GCGCCGATTGCTGTCTATGG	152.142	53.303	552.776	656.892	102.723	604.834	5.88803		KRAS CDE Pos	CR1	GCTTTAGAATTATCCAAGAG	139.274	114.497	142.633	446.077	126.886	294.355	2.31985	enriched
KRAS CDE Neg	DCAF6	TGCGGAAGAGAGAAGAGAAG	300.298	99.0985	1356.77	990.915	199.698	1173.84	5.87809		KRAS CDE Pos	HOXA4	GCTCTCGAACCGCCTACACC	36.4255	34.2248	71.3165	89.9004	35.3251	80.6085	2.2819	enriched
KRAS CDE Neg	MMAA	GAAAAATGCTTACTGAGAGA	42.5201	64.5642	222.401	406.529	53.5421	314.465	5.87323		KRAS CDE Neutral	RAD18	GGAATGTTAACCCCGCAAAC	107.134	153.078	412.365	180.657	130.106	296.511	2.279	enriched
KRAS CDE Neutral	ZNF133	ACCAGAACTCATCACCCAGC	261.764	366.364	1659.62	1975.01	314.064	1817.32	5.78645		KRAS CDE Neutral	GPR139	GTTTGCCAACCCTATCCATG	173.557	186.68	663.738	155.827	180.119	409.783	2.27507	enriched
KRAS CDE Pos	ICA1L	TTGAGAGCTACAAAATCATA	196.655	254.503	1185.13	1407.98	225.579	1296.56	5.74768		KRAS CDE Pos	TRIM24	CTTCTGGTTTAGATAAGTCT	374.968	195.392	192.766	1088.22	285.18	640.495	2.24593	enriched
KRAS CDE Neg	DDX23	TGATGCATCACCTTCCAAGG	164.101	231.23	1097.38	1156.38	197.665	1126.88	5.70094		NTC	NTC	GTTACCGTGACGATAAGAAT	81.4217	164.901	262.671	290.25	123.161	276.46	2.2447	enriched
KRAS CDE Neutral	CXCR5	CATGAACTACCCGCTAACGC	89.0264	179.428	1050.92	475.937	134.227	763.428	5.68757		KRAS CDE Neg	POLR3F	AATCCAATCATCCCTCCCAC	308.545	311.756	875.569	511.148	310.151	693.359	2.23555	enriched
KRAS CDE Neutral	DDX52	TTGCATATGATGTTGAACAG	619.863	573.57	3826.41	2928.75	596.716	3377.58	5.66027		KRAS CDE Pos	LAMB1	GGAATGTGGAAGAACTTAAG	0	41.0697	0	91.6128	20.5349	45.8064	2.23067	enriched
KRAS CDE Neg	C3orf56	GGAACCATAGGCAGAGCCCA	447.125	313.812	1706.51	2566.84	380.468	2136.67	5.6159		KRAS CDE Pos	ALDH8A1	CTGAAGTTCTGCACAGACCG	327.83	284.999	815.55	551.389	306.414	683.47	2.23054	enriched
KRAS CDE Neutral	NAAA	CCACTGGAAGCCAGCACCCA	39.8626	156.155	403.075	696.553	98.0089	549.814	5.60984		KRAS CDE Neg	GRB10	GTAGTTGTCCTGAAATTCAA	494.958	433.721	1116.35	939.245	464.34	1027.8	2.21346	enriched
NTC	NTC	TCAACTATGAACCGCCGTGC	138.855	204.954	1557.67	369.966	171.904	963.816	5.60671		KRAS CDE Neg	PGBD1	TGGAGGTTCACACTTCAGGG	207.84	181.08	39.5418	816.809	194.46	428.176	2.20187	enriched
KRAS CDE Pos	SYNJ1	TCTTCCTTCATACAAATCCG	217.915	152.401	519.222	1542.46	185.158	1030.84	5.56734		KRAS CDE Neg	TAF13	GAATCCTTATACTGAGTCAG	109.277	55.3819	239.369	122.436	82.3292	180.903	2.19731	enriched
KRAS CDE Neutral	GPR150	GCAGGTCTACGCGTTCTACG	285.682	444.442	2269.18	1737.04	365.062	2003.11	5.48705		KRAS CDE Pos	SLC30A10	TGTGCTTCCCCTGAAGAGTG	190.698	82.1394	408.128	189.219	136.419	298.674	2.18939	enriched
KRAS CDE Neutral	SLC6A12	AAGGACCCCGAGTCTTCAGG	242.497	87.8373	791.093	1011.99	165.167	901.539	5.45834		KRAS CDE Neutral	PRDM11	GCGGCGCTCACCATCCCACA	242.122	481.636	379.884	1196.1	361.879	787.994	2.17751	enriched
KRAS CDE Pos	SLC6A4	TACATATGTTACCAGAATGG	90.3551	210.96	1030.27	603.597	150.657	816.934	5.42246		KRAS CDE Neg	CD200R1	TACTGATGAGAGAATAACCT	317.116	140.01	108.74	883.593	228.563	496.166	2.17081	enriched
KRAS CDE Pos	LBH	CTTGGCCGATCTCAGATAGT	25.2463	26.2761	166.908	111.548	25.7612	139.228	5.40456		NTC	NTC	TTACAGTTCATACCGTCGCC	531.384	545.107	39.5418	2284.33	538.245	1161.93	2.15874	enriched
KRAS CDE Neutral	HADHA	GCAACAGGTTTACAAAAAAG	35.2119	78.8284	308.006	307.995	57.0201	308.001	5.40161		KRAS CDE Pos	GPR158	TGAGCACAGCTTGGATCCAG	188.556	163.034	391.182	366.451	175.795	378.816	2.15488	enriched
KRAS CDE Neg	PANK3	ATGCCAAAAGTTTCATTGAG	89.6907	32.2821	203.043	449.289	60.9864	326.166	5.34818		KRAS CDE Neg	ITPR2	CAGGAATGGCGGTGGTGTGG	175.699	208.46	394.712	432.378	192.08	413.545	2.15299	enriched
KRAS CDE Neg	UROC1	CCGCTGGGTGTGCACATCGG	227.881	277.776	1327.95	1347.87	252.829	1337.91	5.29177		KRAS CDE Neg	WDR46	AGAGTAATCCATACAGAAGC	40.7109	47.9147	154.637	35.9602	44.3128	95.2985	2.15059	enriched
KRAS CDE Neutral	XRCC2	TTCTACCTTCAAGTCGGGCA	276.38	374.622	1698.76	1686.23	325.501	1692.5	5.19966		KRAS CDE Neg	SLC12A6	AGAGCCTCACAGGTGCACCG	100.706	219.038	181.469	504.299	159.872	342.884	2.14474	enriched
KRAS CDE Pos	C5orf46	GCAGTCCCAGGACAACTGTC	201.306	153.152	1175.67	664.948	177.229	920.309	5.19277		KRAS CDE Neutral	POLR1D	AATAGAAGAACTGCTTAAGG	394.252	387.051	590.303	1057.4	390.652	823.852	2.10892	enriched
KRAS CDE Neutral	ELF2	GAGGCTTGTATATCAGTTCA	199.977	264.263	1592.08	788.89	232.12	1190.48	5.12875		KRAS CDE Neg	BMPR1A	TGTGCCCTTGAATACCAGGG	171.414	140.01	389.063	260.283	155.712	324.673	2.08508	enriched
KRAS CDE Neutral	UGT2B4	TTAAGAGTAGATGGGCTGTT	318.236	331.83	1808.03	1518.91	325.033	1663.47	5.11784		KRAS CDE Neutral	CSN3	CATGTGGCCTAACTACAGCT	124.275	326.069	539.463	393.849	225.172	466.656	2.07245	enriched
KRAS CDE Pos	SLC26A9	GATGAGAGCGAAGATGAGCG	147.491	195.194	610.849	1142.74	171.343	876.797	5.11721		KRAS CDE Neutral	RP1	AGCTCAGGATCACTGCCTGG	94.2778	98.3184	184.999	210.624	96.2981	197.812	2.05416	enriched
KRAS CDE Neg	BCAR1	CAAAGCGCTCTATGACAATG	212.6	256.755	1260.41	1116.1	234.678	1188.26	5.06335		KRAS CDE Neutral	PFDN6	TCTGGTATAGAACAGCTGTA	190.698	245.174	471.677	418.679	217.936	445.178	2.0427	enriched
NTC	NTC	CATACCCGCGCCGTGACTCC	391.982	550.297	1862.66	2846.32	471.139	2354.49	4.99744		KRAS CDE Neg	HIST1H3E	TCGCAAGAGCGCTCCGGCCA	209.982	247.663	463.91	464.057	228.823	463.984	2.0277	enriched
KRAS CDE Neg	DUSP11	TACATTGAAGACCTTCAGAA	136.197	200.449	1266.87	412.726	168.323	839.797	4.98919		KRAS CDE Pos	PRTN3	CAGCAGCAAGGCCAGCAGCA	205.697	232.728	557.116	330.491	219.213	443.804	2.02453	enriched
KRAS CDE Pos	SNRPF	AATACAGAAGAATACATAGA	459.748	853.598	2722.15	3829.8	656.673	3275.98	4.98875		KRAS CDE Pos	MAGOHB	TGATGTCATGATCAGAAAAG	81.4217	156.189	213.95	266.276	118.806	240.113	2.02106	enriched
KRAS CDE Neg	FURIN	CCAGTCATTAAACCCATCTG	296.976	387.385	1770.17	1631.69	342.181	1700.93	4.97087		KRAS CDE Pos	ALDH8A1	GCCAAATAGTGGAAAAGACG	117.847	110.141	230.19	227.748	113.994	228.969	2.0086	enriched
KRAS CDE Pos	CELA3B	CCCTGCTACATCACCGGCTG	25.2463	89.3388	377.264	191.49	57.2925	284.377	4.9636		KRAS CDE Pos	PBXIP1	GCAGGTCCTCCCAGACCCCG	53.5669	148.1	0.706104	404.124	100.833	202.415	2.00742	enriched
KRAS CDE Pos	TARBP1	TCAGTGTCTCTGCAGAACAG	255.785	154.654	972.627	1057.84	205.219	1015.24	4.94708		KRAS CDE Neutral	POLR1D	TGGTCTTGCTCTTTATGAGA	344.971	169.257	417.307	613.035	257.114	515.171	2.00367	enriched
KRAS CDE Neutral	POGK	CAAAACTTCCCATTCCTCAT	503.597	274.022	2303.16	1536.26	388.81	1919.71	4.9374		KRAS CDE Pos	ROBO3	GTCGGGGTCGGCCTTCAGCG	179.985	197.259	0	188.363	188.622	94.1814	0.499313	depleted
KRAS CDE Pos	TNFSF18	GAGCTCCTTGAGTTCTTGAA	233.196	350.598	1488.84	1360.26	291.897	1424.55	4.88031		KRAS CDE Pos	SLC35B4	ATGGATTCCAGGCATTTGTG	430.678	449.9	329.044	110.449	440.289	219.747	0.499097	depleted
KRAS CDE Neg	STAT5A	GTTGCTTATTCACAAAACCT	306.942	431.679	1187.71	2406.95	369.31	1797.33	4.86673		KRAS CDE Neutral	ATP5L2	GACTTACTTGAAGCCTCGAT	124.275	117.609	0	120.723	120.942	60.3617	0.499096	depleted
KRAS CDE Neutral	IKZF3	GCAGTTTAATGTGGCGGAGG	221.902	274.773	1345.59	1066.52	248.337	1206.05	4.85652		KRAS CDE Neutral	RFWD3	CTGTTGCTGGTGTCTTGATG	167.129	453.634	4.94273	304.805	310.381	154.874	0.49898	depleted
KRAS CDE Pos	CDHR2	GTAGCCAGTGAAGTTCACTT	114.937	114.864	708.929	393.515	114.901	551.222	4.79738		KRAS CDE Pos	YWHAQ	AGTTAAGAGCAAGCCCCAGG	194.984	383.94	0.706104	287.681	289.462	144.194	0.498145	depleted
NTC	NTC	CGTTACGTTTCTTGCCAGGA	249.805	399.397	1099.53	2001.66	324.601	1550.59	4.77692		KRAS CDE Neutral	PARP8	CCTCTGACTTAACAGCTGCA	404.966	635.336	1.41221	512.004	520.151	256.708	0.493527	depleted
KRAS CDE Neg	BORA	ATAGTGGTGGTACTCAGTAT	132.211	197.446	1207.5	329.066	164.829	768.284	4.66111		KRAS CDE Pos	GPR158	GGCCTCTTACCTCTACACCG	0	87.7398	0	42.8097	43.8699	21.4049	0.487917	depleted
KRAS CDE Neg	ITPR2	GTTCATGAAGATGTGCCGCA	155.464	152.401	819.485	595.541	153.933	707.513	4.59625		NTC	NTC	GCCCTCGAGCTCACGATGAG	334.258	341.625	12.0038	316.792	337.941	164.398	0.486469	depleted
KRAS CDE Neg	OR2L13	CCGAGGCCAGAAAGAATATG	360.092	206.455	627.626	1971.3	283.273	1299.46	4.5873		KRAS CDE Neutral	ZNF730	AAGAAAAGGCTGTAAAAATG	156.415	112.008	0	130.142	134.212	65.0708	0.484836	depleted
KRAS CDE Neg	SCN5A	AGTCAACTTTGACAACGTGG	237.847	279.278	1142.55	1217.73	258.562	1180.14	4.56423		KRAS CDE Neg	DUSP11	TGATTGATGTAGAAGGCGTG	194.984	199.748	2.11831	188.363	197.366	95.2405	0.482558	depleted
KRAS CDE Neutral	RABL2A	GCATGCCTCCTACTACCACA	89.0264	161.41	695.594	440.613	125.218	568.104	4.5369		KRAS CDE Neg	NCOA6	ACAGGCTGCTGAAATCCCTG	147.845	189.17	0.706104	160.965	168.507	80.8353	0.479715	depleted
KRAS CDE Neg	PKIG	AATGCGGTCCCTGACATCCA	366.071	495.493	2011.5	1890.11	430.782	1950.81	4.52853		KRAS CDE Pos	CDCA4	GGATGGGACGTGGCGCACAG	209.982	203.482	0.706104	196.069	206.732	98.3873	0.475917	depleted
KRAS CDE Pos	FEZ2	GAGCCTGTGCTTCCGCCCCT	326.209	295.043	1434.64	1342.29	310.626	1388.46	4.46989		KRAS CDE Neg	KBTBD3	TCTGTTAGCCCATTACCCAG	293.547	205.349	0	237.166	249.448	118.583	0.475382	depleted
KRAS CDE Neg	C10orf99	GGCAGGACGCCTCTTCCCTG	162.772	464.712	1131.79	1663.92	313.742	1397.86	4.45543		KRAS CDE Neutral	CA8	TGGGGAAGAGAAAACCAGCG	92.1351	45.4256	0	65.0708	68.7803	32.5354	0.473033	depleted
KRAS CDE Neutral	RP1L1	AATCAGCAGTATCCTCCGGG	471.707	403.151	1810.61	2077.89	437.429	1944.25	4.44472		KRAS CDE Neutral	OR7D2	TCCAGGCTCACGTTGAAGCG	308.545	194.148	211.125	24.8296	251.347	117.977	0.469381	depleted
KRAS CDE Pos	BTNL9	GTTCAGTCTGGAAACATCTG	262.428	298.046	1272.89	1202.86	280.237	1237.87	4.41723		KRAS CDE Pos	PPTC7	GGTTTGCTGTGTGTAAGCGG	387.824	283.754	126.393	187.507	335.789	156.95	0.467405	depleted
KRAS CDE Neutral	RP1	ATTTCTACAGCACCTGACAG	310.264	530.027	2044.62	1616.82	420.145	1830.72	4.35736		KRAS CDE Pos	OR52E8	ACAAGAGAGCAGTGTTTCCC	400.681	295.577	134.16	190.931	348.129	162.546	0.466912	depleted
KRAS CDE Pos	AGFG1	CCCCACCTACGTTAACATGA	300.962	283.782	1016.94	1500.32	292.372	1258.63	4.30487		KRAS CDE Neg	AMFR	GGACCTCAGTCCTCGCCTGG	257.121	203.482	206.182	7.70575	230.301	106.944	0.464366	depleted
NTC	NTC	GCGCGAGGGCACCGACAAGT	207.285	212.461	651.286	1146.46	209.873	898.874	4.28294		KRAS CDE Neutral	SLC1A2	GAATCTGCTGCTCACCCTGA	1388.45	1042.92	382.708	740.608	1215.69	561.658	0.462009	depleted
KRAS CDE Neutral	IMPACT	GGATTTATCAAATAGCCTTG	231.203	322.821	946.386	1422.23	277.012	1184.31	4.2753		NTC	NTC	GCGGATCTGACGGTTACTTA	130.703	313.623	158.167	47.0907	222.163	102.629	0.461953	depleted
KRAS CDE Neutral	PRDM9	GAAGTGTTCTCTGCAGCACG	256.449	209.458	978.65	1010.13	232.954	994.388	4.26861		KRAS CDE Neutral	HAL	AGCGAGCCAGTGCTATTGCA	368.54	433.099	197.003	172.951	400.82	184.977	0.461497	depleted
KRAS CDE Neutral	KCNAB3	GCTCTTGAGGATGTTCCCTA	245.819	329.578	1155.45	1296.43	287.698	1225.94	4.26121		KRAS CDE Neutral	DCAKD	GGATATCCAGAATCACGTAG	250.693	469.19	74.847	256.858	359.942	165.853	0.460776	depleted
NTC	NTC	TGGCACGGAGTTGCATACGC	377.366	501.498	2224.44	1498.46	439.432	1861.45	4.23603		KRAS CDE Pos	CREM	CAACACGCAAACGAGAGCTG	214.268	92.0957	0	138.703	153.182	69.3517	0.452742	depleted
KRAS CDE Neg	BCAR1	ATAGATGTCCTGTGGCCCCG	486.323	270.269	1766.3	1417.28	378.296	1591.79	4.20779		KRAS CDE Neutral	ADRB1	TACGGACGAGGCGATGGCGT	143.559	93.3402	3.53052	103.6	118.45	53.565	0.452217	depleted
NTC	NTC	ACCGGACTGCGATATGCCGT	290.332	424.922	1740.92	1230.12	357.627	1485.52	4.15383		KRAS CDE Neutral	ZNF141	AAGATCGTAGCCAGACCCCC	0	56.6264	0.706104	24.8296	28.3132	12.7679	0.450951	depleted
KRAS CDE Neg	UPK1A	GTACCGTGTATACCCACTGA	221.902	286.785	1312.9	788.27	254.343	1050.58	4.13057		KRAS CDE Neg	ATP6V1C1	TGACTTCCAGTATAATGAAG	212.125	334.158	127.805	117.299	273.142	122.552	0.448675	depleted
NTC	NTC	TCGTGCCGGAATAACCACTA	101.65	117.116	389.739	506.922	109.383	448.331	4.09872		KRAS CDE Neg	TLN2	CTATTCAGTACAAACCACCG	239.98	261.353	166.641	58.2212	250.666	112.431	0.448528	depleted
KRAS CDE Neutral	DHODH	GGATGCTGTGATCATCCTGG	117.595	84.8343	298.112	524.894	101.214	411.503	4.06565		KRAS CDE Neg	OLFM4	AAAACTGGTCATACAGCTGA	192.841	355.315	0	245.728	274.078	122.864	0.448281	depleted
KRAS CDE Neg	ZBTB3	CTGGGTACTACCCACCATCA	190.012	177.176	622.464	862.635	183.594	742.55	4.04452		NTC	NTC	GCAAATAGGTCGGAGCGTGT	248.55	195.392	0.706104	196.925	221.971	98.8154	0.445172	depleted
KRAS CDE Neutral	TATDN1	TCAAATTCACCACATCTTGT	139.519	168.167	593.212	635.822	153.843	614.517	3.99444		KRAS CDE Pos	EMB	CGCCTAATTGGAATAGTGCA	2.14268	16.8012	0.706104	7.70575	9.47196	4.20593	0.44404	depleted
NTC	NTC	CGGTGAGGATCCCTCTTGCG	11.2944	23.2731	45.5986	92.3367	17.2838	68.9676	3.99031		NTC	NTC	CTTAAGTTCGCGACGGAATG	282.833	208.46	0	217.473	245.647	108.737	0.442655	depleted
KRAS CDE Neutral	SLC1A2	CGTGGACATGTAATACACCA	100.985	63.0627	301.553	351.995	82.0239	326.774	3.98389		KRAS CDE Pos	KIF17	TCAGCGTGTAGCCGACCGAA	349.256	420.031	235.133	104.456	384.644	169.794	0.441432	depleted
KRAS CDE Neg	NANOG	CATCAGGGAGATACAACAGA	104.307	114.864	408.237	464.162	109.586	436.199	3.98045		KRAS CDE Neg	CPD	CGCCCATCTGGATTTAGAGA	289.261	495.948	180.057	164.389	392.605	172.223	0.438668	depleted
KRAS CDE Neutral	AT5L2	GGGAGGAACCAGCTCAACCG	192.669	125.375	835.831	429.458	159.022	632.645	3.97835		KRAS CDE Neg	OSTC	AATGGACAATATATTATGGA	257.121	151.833	179.35	0	204.477	89.6752	0.438558	depleted
KRAS CDE Pos	GH1	GTCATAGACGTTGCTGTCAG	267.743	137.387	769.584	837.847	202.565	803.716	3.96769		KRAS CDE Neutral	ZNF141	TTATGTATCTTCACATTGTA	394.252	112.008	153.225	68.4956	253.13	110.86	0.437956	depleted
NTC	NTC	TCTGCACCGCGACTTAGCTT	159.45	435.433	1439.37	918.409	297.442	1178.89	3.96343		KRAS CDE Pos	EN1	CCTGGCGCCCGGGTGCCCAA	205.697	286.243	154.637	59.9336	245.97	107.285	0.436172	depleted
KRAS CDE Neg	CD2BP2	ATGGTCTGGTGGATGTGATG	236.518	340.839	905.95	1373.28	288.678	1139.61	3.94769		KRAS CDE Neg	C3orf56	AGGTGGGTGGGAATTTCATG	377.111	217.794	228.072	30.823	297.452	129.447	0.435186	depleted
NTC	NTC	CAGGGACGTAGCCGCCGTTA	2.6575	21.0209	93.3481	0	11.8392	46.6741	3.94233		KRAS CDE Neg	RASSF8	CATGGAACTTAAAGTATGGG	94.2778	233.973	0.706104	142.128	164.125	71.4172	0.435138	depleted
KRAS CDE Pos	CDHR2	AGTTGGCACCACTCCCCGAC	384.674	169.669	1195.89	980.38	277.171	1088.13	3.92586		KRAS CDE Neg	DHX8	ACACAGCTAGCAGGGTGAGG	216.41	148.722	0.706104	157.54	182.566	79.1229	0.433393	depleted
KRAS CDE Pos	RFX4	ATGCGAGCCATGAAGGGAGA	206.621	96.8463	577.726	609.794	151.734	593.76	3.91317		KRAS CDE Neg	LENG8	CGTCTGAGTCCAGAGATGGG	167.129	319.224	0.706104	209.768	243.176	105.237	0.43276	depleted
KRAS CDE Neutral	SMOX	GAATGACCCTGACGACCCAG	235.189	217.716	927.028	816.777	226.453	871.903	3.85026		KRAS CDE Neutral	ITGBL1	GGCAAAATCTGCAGTAACAG	34.2828	9.33402	0	18.8363	21.8084	9.41814	0.431858	depleted
KRAS CDE Neutral	OTUD4	GTCTGACACAGTGAATAAGG	129.553	123.122	337.258	617.85	126.338	477.554	3.77998		KRAS CDE Pos	HOXA4	GCGGTAGCCATAGGGGTAGG	160.701	504.66	235.839	50.5155	332.68	143.177	0.430375	depleted
KRAS CDE Neg	TTBK1	TGTGGCCGGGTTTCGAGGAA	248.477	214.713	638.811	1105.56	231.595	872.186	3.766		KRAS CDE Neg	IGFL2	CTTCCCTTGGACACAAGAGG	302.117	372.116	50.8395	238.878	337.117	144.859	0.429699	depleted
KRAS CDE Pos	FEM1B	AGACCGGTTGAGAAGCAAGG	94.3414	93.0925	441.79	261.517	93.717	351.654	3.7523		KRAS CDE Neutral	EFTUD2	ACAGAGAAAAGGCTTGTCCC	158.558	184.191	0	147.265	171.375	73.6327	0.429659	depleted
KRAS CDE Neg	CACNB3	GCTGGTTCAGAAGGCCAAAC	119.588	61.5612	345.431	321.629	90.5744	333.53	3.68239		KRAS CDE Neutral	CDH12	TGCATATGTACTCCAGGTCA	259.264	490.97	126.393	195.212	375.117	160.802	0.428673	depleted
KRAS CDE Pos	LBH	GGACCGTCTGCCCTCCATAG	140.848	103.603	497.283	397.853	122.225	447.568	3.66183		KRAS CDE Neutral	LYZ	AGGGTTGTCCGTGATCCACA	1157.05	769.124	244.312	577.075	963.084	410.694	0.426436	depleted
NTC	NTC	GCCCTCGAGCTCACGATGAG	183.368	78.0776	414.689	541.006	130.723	477.848	3.65543		KRAS CDE Neutral	FAM105A	TTATTTCAGATATTCAGCCA	312.831	520.839	254.197	100.175	416.835	177.186	0.425075	depleted
NTC	NTC	CGAAACCATACCTCCTTCGA	378.694	300.298	1381.72	1093.79	339.496	1237.76	3.64586		KRAS CDE Pos	TCF12	TCAAATCCATCAACACCAGT	44.9962	29.2466	0.706104	30.823	37.1214	15.7646	0.424675	depleted
KRAS CDE Neutral	AXIN2	TTTGCTGGACAAGCCAACCA	146.163	102.101	365.649	526.133	124.132	445.891	3.59207		KRAS CDE Pos	HLA-DQB1	TCGGTGACAGATTTCTATCC	222.838	113.253	142.633	0	168.046	71.3165	0.424388	depleted
KRAS CDE Neg	KBTBD3	CTAACACACAACGATGACAC	117.595	113.363	414.259	414.585	115.479	414.422	3.58874		NTC	NTC	GACTCCGGGTACTAAATGTC	2629.06	468.568	1078.93	231.172	1548.82	655.05	0.422936	depleted
KRAS CDE Neg	CPAMD8	TGTAGGGTACTACAGCCACG	41.8557	111.861	128.192	423.261	76.8584	275.727	3.58746		KRAS CDE Pos	LOR	GTCCAGTGCCAGAGCTACGG	17.1414	7.46722	3.53052	6.84956	12.3043	5.19004	0.421806	depleted
KRAS CDE Pos	PCYOX1	GGTCAATTATGGCCAAAGCA	207.95	150.9	512.339	774.637	179.425	643.488	3.58639		KRAS CDE Neutral	U2SURP	ATCTCGCTCCAAAGACAAGA	0	70.3163	0	29.1106	35.1582	14.5553	0.413995	depleted
KRAS CDE Neg	PIEZO1	CAGCCTGCTCGAGGGCACCT	132.875	268.016	565.251	867.593	200.446	716.422	3.57414		KRAS CDE Neutral	DNAJC6	AATAGCTGAGATGAGAAAGG	239.98	80.8949	0	132.71	160.437	66.3551	0.413589	depleted
KRAS CDE Neg	KBTBD12	GATGTGGTACTCACAGCAGA	369.393	404.652	1607.14	1126.63	387.023	1366.88	3.53179		NTC	NTC	CATATGCCTATAACCGGCGG	205.697	297.444	129.923	77.0575	251.571	103.49	0.411377	depleted
KRAS CDE Neg	OSTC	CGAGCACTAAGAACGGGACA	152.806	112.612	555.787	377.403	132.709	466.595	3.51592		KRAS CDE Neg	ARNTL2	ATAGCCAAACTGAAAAGCGG	0	41.692	0	17.1239	20.846	8.56194	0.410724	depleted
KRAS CDE Pos	RAPGEF3	GGAAGGATATTGGTGCAGAA	273.058	260.509	739.902	1124.77	266.784	932.337	3.49473		KRAS CDE Neg	SEMA5B	TGGAGTAAGTGCACTGACGA	36.4255	138.766	0	71.9203	87.5957	35.9602	0.410525	depleted
KRAS CDE Neutral	OTUD4	GTTAGAGTGCCCTTCTCCTG	346.804	391.139	1258.26	1302.63	368.972	1280.45	3.47031		KRAS CDE Pos	TNFSF9	CCAGGGCCCAAGGCAGTACG	325.687	322.335	164.522	99.3186	324.011	131.92	0.407148	depleted
KRAS CDE Neutral	AXIN2	ACACCAGGCGGAACGAAGAT	58.4651	96.8463	145.83	391.656	77.6557	268.743	3.4607		KRAS CDE Neutral	ISL2	CTGGGGACGAGTTCTCGCTG	111.419	180.458	3.53052	114.73	145.938	59.1303	0.405173	depleted
KRAS CDE Neutral	MOK	CCATTGCGTGCAGGAGGGAG	287.01	192.942	433.187	1219.59	239.976	826.387	3.44362		KRAS CDE Neg	IL11RA	GGATCCTGTGGGCATGGCCA	379.254	77.1613	0	183.226	228.208	91.6128	0.401445	depleted
KRAS CDE Neutral	XCL2	TAGGGAGTGAAGTCTCACAT	96.9989	51.8015	261.977	246.025	74.4002	254.001	3.41398		KRAS CDE Neutral	GYS2	TCCAGAGGAACAGAACTGAG	2.14268	0	0	0.856194	1.07134	0.428097	0.399591	depleted
KRAS CDE Neg	ARNTL2	GAGTTTCCACGAAAACGCAA	17.2738	87.8373	284.776	73.1257	52.5555	178.951	3.40499		KRAS CDE Pos	LBH	GGACCGTCTGCCCTCCATAG	4.28535	0	0	1.71239	2.14268	0.856194	0.399591	depleted
KRAS CDE Neg	NACC1	GTACTGTGACGTGTCAGTGG	152.806	95.3448	524.814	307.376	124.076	416.095	3.35356		KRAS CDE Pos	OCEL1	AAGTTGCAGCCCGGGTTTGG	557.096	487.236	361.525	52.2279	522.166	206.877	0.396189	depleted
KRAS CDE Pos	TAS2R9	TAAAGGGAACCATCACCCCC	90.3551	57.0567	351.884	140.674	73.7059	246.279	3.34137		KRAS CDE Neg	VDAC1	AACCTAGCACCAGAGCACCC	126.418	116.986	2.11831	94.1814	121.702	48.1499	0.395637	depleted
KRAS CDE Pos	SLC39A4	GGGCAGAGACAAGTGAGCAG	51.1569	27.0269	187.987	71.8863	39.0919	129.937	3.32387		KRAS CDE Neutral	U2SURP	AAGATGAGTGTACTCCGACA	205.697	239.573	7.76714	167.814	222.635	87.7906	0.394325	depleted
KRAS CDE Neutral	ZNF705A	AAGGTCGGAAGACAGACTGA	243.162	80.3298	561.379	493.908	161.746	527.644	3.26218		KRAS CDE Neg	OR5C1	GGTGAGGGTTGTGTGAACAA	387.824	256.375	185.705	67.6394	322.099	126.672	0.393271	depleted
KRAS CDE Neg	GRB10	TTGGATTACTCTGGCTGTCA	338.167	237.236	823.356	1038.01	287.702	930.685	3.2349		KRAS CDE Neg	RCBTB2	AGATTAGTAGAGATATGACA	2.14268	257.619	3.53052	98.4624	129.881	50.9964	0.39264	depleted
KRAS CDE Pos	DRAXIN	CCAGGCTGCCAGAGGCTGAG	91.0195	175.675	341.559	513.739	133.347	427.649	3.20704		KRAS CDE Pos	HLA-DRB5	AGAAGGACTTCCTGGAAGAC	130.703	116.986	0.706104	95.8938	123.845	48.2999	0.390004	depleted
KRAS CDE Neutral	IKZF3	GTATCCCATAGCCCTCACCC	451.776	312.31	1464.75	984.098	382.043	1224.42	3.20494		KRAS CDE Pos	ICA1L	TTGAGAGCTACAAAATCATA	295.689	271.309	216.774	4.28097	283.499	110.527	0.389869	depleted
KRAS CDE Neutral	PTGIS	TGACCGCATAACTCCTCCCC	303.62	330.328	1088.34	919.029	316.974	1003.69	3.16646		KRAS CDE Pos	TARBP1	GGTCGGTTTGTCGATGAGCG	158.558	210.949	0	143.841	184.753	71.9203	0.389277	depleted
NTC	NTC	TCCTATAATTGAGCGAACGG	98.3276	168.918	342.42	493.908	133.623	418.164	3.12944		NTC	NTC	TGTCCTACCGAATGAACCGT	77.1364	476.657	1.41221	214.049	276.897	107.73	0.389063	depleted
KRAS CDE Neutral	OGFR	TGTGGGCCAGAGCATAGCAA	114.273	102.101	431.036	243.546	108.187	337.291	3.11766		NTC	NTC	GCGAGGTATTCGGCTCCGCG	1268.46	88.9844	462.498	65.0708	678.724	263.784	0.388647	depleted
KRAS CDE Neg	ZBTB3	TGTGACTGCACCGTGATGGT	322.887	281.53	1131.79	732.496	302.208	932.144	3.08444		KRAS CDE Neg	KRTAP4-2	CAAGAGCCACTAGAGCAGGT	197.126	64.0936	10.5916	90.7566	130.61	50.6741	0.38798	depleted
NTC	NTC	TTGGACGTACACTTTCGTTC	393.311	344.593	1438.51	826.072	368.952	1132.29	3.06894		KRAS CDE Neg	CD2BP2	ACCCCAACCCCTACCCAGAG	47.1389	107.03	0	59.0774	77.0845	29.5387	0.383199	depleted
KRAS CDE Pos	CNR2	ACAGGTATGAGGGCTTCCGG	19.9313	129.128	68.8281	387.318	74.5298	228.073	3.06016		KRAS CDE Pos	RERGL	CCAGTGAAGCTCACTTGTGA	169.271	92.718	0	99.3186	130.995	49.6593	0.379094	depleted
KRAS CDE Neutral	LYZ	AGGGTTGTCCGTGATCCACA	1076.95	973.718	3994.18	2252.64	1025.34	3123.41	3.04623		KRAS CDE Neg	DNAJC22	ATAGATGCCAACTATCACCT	291.404	174.857	174.408	0.856194	233.131	87.6319	0.375892	depleted
KRAS CDE Neg	ZBTB3	GCAGTCACAAAGGAAACCCT	102.978	159.158	618.162	174.138	131.068	396.15	3.02247		KRAS CDE Pos	ALOX5AP	GACTGATGTACTTGTTTGTG	572.095	354.693	252.079	94.1814	463.394	173.13	0.373614	depleted
KRAS CDE Neg	ST8SIA4	CCTGCTTTCATGGTCAAAGG	321.558	217.716	468.891	1145.84	269.637	807.367	2.99427		KRAS CDE Neutral	IQSEC3	CTGCATGTGCAACCCCGAAG	278.548	336.647	213.243	15.4115	307.598	114.327	0.371679	depleted
KRAS CDE Pos	BTNL9	GAACGCGCTCTTCCACGCAG	245.819	147.897	655.157	522.415	196.858	588.786	2.99092		KRAS CDE Neutral	ACTRT3	CTACCGGTGGTGATCGACAA	276.405	248.907	0.706104	194.356	262.656	97.5311	0.371326	depleted
KRAS CDE Neutral	FILIP1L	ACTGCAGTGATACCGAACTG	366.071	474.472	924.878	1547.41	420.271	1236.15	2.9413		NTC	NTC	TCATGCGCCTCGTAATACCT	111.419	214.06	120.744	0	162.74	60.3719	0.370972	depleted
KRAS CDE Neg	NR1H2	GGACCCTCCTCCTTTACAGT	114.937	203.452	665.052	270.193	159.195	467.622	2.93743		KRAS CDE Pos	PRMT8	TGCCCACTTTGGGATCCACG	291.404	376.472	168.053	78.7699	333.938	123.411	0.369563	depleted
KRAS CDE Pos	MLYCD	TCTGCTCCGCCACCTGGCCG	344.147	203.452	840.133	762.862	273.799	801.498	2.92732		KRAS CDE Neutral	RABEP1	GAAGACAATGAAAGATAAGC	92.1351	168.012	0	95.8938	130.074	47.9469	0.368613	depleted
KRAS CDE Neutral	CCDC58	AGTACATGAATTAAACACTA	445.796	358.857	995.426	1350.35	402.326	1172.89	2.91526		KRAS CDE Neg	REV3L	AACCTGAAAGAGTAAAACCG	25.7121	0	0	9.41814	12.8561	4.70907	0.366292	depleted
KRAS CDE Pos	TCF3	CTATCCCGCCCCCTTCTACG	213.929	105.855	468.461	448.05	159.892	458.256	2.86603		KRAS CDE Neg	RDM1	CCAGAAGCTTGCTATTCAGA	276.405	365.894	112.271	122.436	321.15	117.353	0.365416	depleted
KRAS CDE Neg	UROC1	ATTGGTGATGACGAGCCGTG	261.764	75.8254	402.214	561.457	168.795	481.835	2.85456		KRAS CDE Neg	WASF3	TATGGTGTCAGGATGTTCAG	445.677	393.274	262.671	42.8097	419.475	152.74	0.364122	depleted
KRAS CDE Neg	C2orf16	GGAACTCGATGTCCTAACCC	334.181	228.227	951.118	646.357	281.204	798.738	2.84042		KRAS CDE Pos	RTCA	GCATTGAGACCTGCATCAAG	338.543	216.549	0.706104	201.206	277.546	100.956	0.363745	depleted
KRAS CDE Pos	SIAE	TTGAAGCCTGGTCATCTGGA	435.166	512.009	1281.49	1408.6	473.588	1345.05	2.84012		KRAS CDE Pos	KIF17	GGACTGTAACTACAGCAACC	79.279	97.6961	0	64.2146	88.4876	32.1073	0.362845	depleted
KRAS CDE Neutral	INHBB	GCGCAGGGCCGTGACCATGG	302.955	337.085	765.713	1038.01	320.02	901.863	2.81814		KRAS CDE Pos	DDAH1	GAAAATGCAACTTTAGATGG	368.54	462.968	8.47325	291.962	415.754	150.218	0.361314	depleted
KRAS CDE Neg	GFPT2	GATGCCTTCTGAGTGCATGT	279.038	234.984	982.951	456.106	257.011	719.529	2.79961		KRAS CDE Neg	PKIG	AGCGCCCCAGACAAGGAAGC	0	109.519	0	39.3849	54.7596	19.6925	0.359617	depleted
KRAS CDE Pos	TCF12	CCAATGTCCAGCTTTCATCG	703.574	865.61	1879.44	2511.06	784.592	2195.25	2.79795		NTC	NTC	GCTTCTACTCGCAACGTATT	5491.68	562.53	1672.05	500.018	3027.11	1086.04	0.35877	depleted
KRAS CDE Pos	TMEM65	CTATGAAAGGTATCGCATTG	304.949	437.685	668.493	1398.68	371.317	1033.59	2.78358		KRAS CDE Pos	SIAH2	GGCTATGGAGAAGGTGGCCT	117.847	206.593	115.801	0	162.22	57.9005	0.356926	depleted
KRAS CDE Neutral	GOLGB1	AGAGGCTCAGAATAGAACTG	84.3757	61.5612	153.573	251.602	72.9685	202.587	2.77637		KRAS CDE Neg	RTN4RL1	ACGGGACTGTGTGTGCTACC	74.9937	88.3621	0.706104	57.365	81.6779	29.0356	0.355489	depleted
KRAS CDE Neg	BICD1	AAGCCTTGAGAAGACCACCA	403.276	337.085	1225.14	825.453	370.181	1025.3	2.76972		KRAS CDE Pos	FN1	TGTAGTTCACACCATTGTCA	447.819	416.297	184.293	122.436	432.058	153.364	0.354962	depleted
KRAS CDE Neg	OR2T5	TGAAATCCAACTTTCCAGTG	267.079	246.996	824.647	582.527	257.037	703.587	2.73729		KRAS CDE Neg	ST8SIA4	TGCGCTCCATTAGGAAGAGG	79.279	102.052	0	64.2146	90.6655	32.1073	0.354129	depleted
KRAS CDE Neg	STARD6	CACAAGGATGGTTATAACCG	297.64	113.363	678.817	425.74	205.502	552.279	2.68747		KRAS CDE Pos	SPEN	TCACAACATCCTCTTGGTCA	302.117	359.671	100.267	133.566	330.894	116.917	0.353335	depleted
KRAS CDE Pos	CRYAA	GGCGCTCGTTGTGCTTTCCG	205.957	144.894	299.832	640.779	175.425	470.306	2.68095		KRAS CDE Neg	CPEB1	TGCACTACACCTATAAACCG	366.398	187.303	167.347	27.3982	276.85	97.3724	0.351715	depleted
KRAS CDE Neutral	VAC14	GATGAAGCTGGTCACCCCCG	138.855	173.422	379.415	453.627	156.138	416.521	2.66764		KRAS CDE Pos	CDK7	AGCTCCAAATAGTAACTCGG	276.405	793.392	347.403	28.2544	534.899	187.829	0.351148	depleted
KRAS CDE Neg	ZBTB2	TTGCAACCGTGCAGTCACAC	370.722	233.482	824.647	780.214	302.102	802.43	2.65616		KRAS CDE Neg	DCTN6	TTATTGGTGCCAATGATCAT	96.4204	181.702	0	97.6062	139.061	48.8031	0.350946	depleted
KRAS CDE Neutral	OR3A3	GCATGAGTCAGACAGTCCAG	344.811	192.191	1196.75	226.194	268.501	711.471	2.64979		KRAS CDE Pos	PPID	TCTTTGACGTGGACATCGGA	128.561	173.613	0	105.312	151.087	52.656	0.348515	depleted
KRAS CDE Pos	CCNG2	TTTCTGCCAACTTACCTCCG	213.265	288.287	624.615	701.511	250.776	663.063	2.64405		KRAS CDE Pos	ETF1	AGATATGTTCTTCATTGCCA	235.694	76.539	0	107.88	156.117	53.9402	0.345512	depleted
KRAS CDE Pos	PRPF38A	CTCCCACACTGCGCTACAGG	135.533	157.657	421.142	349.516	146.595	385.329	2.62853		KRAS CDE Pos	DDX60	TCACAGAAATTTGATAACCG	92.1351	107.03	0	68.4956	99.5826	34.2478	0.343913	depleted
KRAS CDE Pos	MUC17	AGTCACACTGGACTCAATCG	413.906	135.134	586.329	844.044	274.52	715.187	2.60522		KRAS CDE Neg	ZMYND15	ACAGTCACTGAAGATCCACG	349.256	474.168	224.541	58.2212	411.712	141.381	0.343398	depleted
NTC	NTC	CTTTAGTCACGATATACGTC	79.7251	65.3149	151.422	223.095	72.52	187.259	2.58216		KRAS CDE Neutral	ADSL	CCAGTGGTTTGAACGCACAC	308.545	168.012	91.7935	70.2079	238.279	81.0007	0.339941	depleted
KRAS CDE Neg	CELSR3	GGAGTCTTCCGGGGTCCGGG	106.965	256.755	480.936	443.712	181.86	462.324	2.5422		KRAS CDE Pos	CDCA4	TGTCCTCATACAGCCTGCAG	456.39	521.461	157.461	172.951	488.925	165.206	0.337897	depleted
KRAS CDE Neg	TCF7L2	CCACTATCGCCTGGCACCGT	47.8351	63.8134	127.762	154.927	55.8242	141.345	2.53196		KRAS CDE Neutral	PTP4A2	TCTACTATCTGATTAGGGGG	533.526	924.691	223.835	265.42	729.109	244.628	0.335516	depleted
KRAS CDE Neutral	C14orf159	AATACATCCAGCATGGCTGG	744.101	597.594	1977.09	1415.42	670.848	1696.25	2.52852		KRAS CDE Neg	PANK3	CTAGATGCTACAGCCCAACC	184.27	250.152	130.629	14.5553	217.211	72.5923	0.334202	depleted
KRAS CDE Neutral	RABEP1	CTAAGGAATGAACTGAGCCA	508.912	414.412	1202.34	1097.51	461.662	1149.92	2.49083		KRAS CDE Pos	ANKRD45	GCTCTCACAGGGGATGTAGA	74.9937	22.4017	0	32.5354	48.6977	16.2677	0.334055	depleted
KRAS CDE Pos	CDKN1C	ACGCCTGCAGTGGACCGAAG	289.004	223.722	468.891	796.326	256.363	632.609	2.46763		KRAS CDE Neutral	SOHLH2	GGAGTGAAGTCTCACATAGG	719.939	754.811	201.24	286.825	737.375	244.032	0.330947	depleted
KRAS CDE Neutral	ELF2	CTGAGTCCATTTAATATACC	354.777	342.34	893.045	823.594	348.559	858.319	2.46248		KRAS CDE Neutral	SLC6A6	CCTGGGCTCTTCCCTGGTGA	222.838	75.2945	96.7362	1.71239	149.066	49.2243	0.330217	depleted
KRAS CDE Neutral	TSPAN8	CTCTAGCTCCTACGTTGCTG	91.6839	180.179	176.802	486.472	135.931	331.637	2.43974		KRAS CDE Neg	KRTAP4-2	GCAGCAAGAGCCACTAGAGC	29.9975	205.971	0	77.9137	117.984	38.9568	0.330187	depleted
KRAS CDE Pos	NKTR	CAAGAAGCTACTCTAGAAGT	23.9175	115.615	164.757	171.04	69.7662	167.899	2.40659		KRAS CDE Neutral	CLEC3A	GACCGTGCACAGCCTAACGG	274.263	177.346	0.706104	146.409	225.805	73.5577	0.325758	depleted
KRAS CDE Neutral	GNPNAT1	GGATGTGTTGGGGAAATGGC	443.139	503.751	1070.71	1207.19	473.445	1138.95	2.40567		KRAS CDE Neg	OR1A1	TTGTTGTGTAGTGAAGTGGG	342.828	419.409	216.774	30.823	381.119	123.798	0.324829	depleted
KRAS CDE Neg	XYLT1	AATGATTTCCTGATTCACCA	523.528	301.049	1300.42	677.962	412.289	989.191	2.39927		KRAS CDE Neg	ZBTB2	TGGTTTCCTGTGTGACTGCA	424.25	641.559	2.11831	342.478	532.904	172.298	0.323319	depleted
KRAS CDE Neutral	AARD	GCATTTCCAAAACCACCAGC	73.7457	165.915	44.7383	522.415	119.83	283.577	2.36648		KRAS CDE Neutral	XRCC2	AGGAACTTCTACCTTCAAGT	98.5631	204.104	0	97.6062	151.334	48.8031	0.322487	depleted
KRAS CDE Neutral	NDUFAF5	TTGGGCGGCGAGGGTCCCAG	156.793	232.731	281.335	636.441	194.762	458.888	2.35615		KRAS CDE Neutral	S100A7A	TCCTTACCTCGGTCATCAGG	347.114	212.193	79.0836	101.031	279.654	90.0573	0.322032	depleted
KRAS CDE Neutral	AFP	AGATGTGCTGGATTGTCTGC	154.8	247.746	462.439	480.275	201.273	471.357	2.34188		KRAS CDE Pos	RFX4	ATGCGAGCCATGAAGGGAGA	212.125	542.618	81.9081	160.965	377.371	121.436	0.321795	depleted
KRAS CDE Neutral	SOS2	ACTGCTCTCATGAATCTCCA	256.449	334.082	746.785	625.906	295.266	686.346	2.3245		KRAS CDE Neg	NARS	CTACATGCAGCGATGTCCTG	145.702	41.0697	0	59.9336	93.3859	29.9668	0.320892	depleted
KRAS CDE Neg	SLC1A3	AATCACAAAACCGAAGCACA	337.503	277.025	510.188	907.254	307.264	708.721	2.30655		KRAS CDE Neg	P2RY12	TGACACACAAAAGTTCTCAG	107.134	125.076	0	74.4889	116.105	37.2445	0.320783	depleted
KRAS CDE Neutral	OR7D2	GCCAGGTGACAAAAACCAGG	171.409	308.557	268.43	833.509	239.983	550.969	2.29587		KRAS CDE Neg	ARID3B	GTAGTGACTACATCTGTGAA	17.1414	220.905	0	76.2013	119.023	38.1007	0.320111	depleted
KRAS CDE Pos	SLC39A4	GCTCCTGACATGGTCCAGCA	56.472	111.861	119.589	265.236	84.1666	192.412	2.28609		KRAS CDE Neg	SLC16A12	GGAGCCTTACTCATTCTTGG	287.119	353.448	2.11831	202.918	320.284	102.518	0.320086	depleted
KRAS CDE Neg	XYLT1	GGGAGATCGGCGGATCCCAG	114.273	72.8224	154.003	273.292	93.5475	213.647	2.28384		NTC	NTC	GGTCTGTCCGTTGCGACCAC	175.699	188.547	0	116.442	182.123	58.2212	0.31968	depleted
KRAS CDE Pos	CREM	TATAAGAGGGTCTTCGTGAA	69.7595	162.912	172.5	357.572	116.336	265.036	2.2782		KRAS CDE Neutral	SDHD	ATCTTGGCTCGGCACGATCT	192.841	334.78	136.984	31.6792	263.811	84.3317	0.319668	depleted
KRAS CDE Neg	ASPSCR1	GGCTCCCAAGTGCACCAGAG	132.211	153.903	287.787	363.15	143.057	325.469	2.2751		KRAS CDE Neg	EXOC5	TGCATTCCTAGAATCTGAAG	257.121	377.095	0	202.062	317.108	101.031	0.318601	depleted
KRAS CDE Pos	LMO4	CCATGGCATAGAGCAGAAAG	283.024	249.998	507.177	704.609	266.511	605.893	2.27342		KRAS CDE Neutral	ZNF141	CTTATGTATCTTCACATTGT	261.407	248.907	0.706104	161.821	255.157	81.2634	0.318484	depleted
KRAS CDE Neutral	POGK	GTACGAATCTGCTCTGAGGG	31.2257	146.396	145.83	249.743	88.8106	197.786	2.22706		KRAS CDE Pos	IL36RN	AATAACCAGCTTCTAGCTGG	355.684	601.733	256.316	47.0907	478.709	151.703	0.316901	depleted
KRAS CDE Pos	MAGOHB	TGATGTCATGATCAGAAAAG	245.819	232.731	685.7	379.262	239.275	532.481	2.22539		KRAS CDE Neutral	ZNF195	CGCTCAGCAGAATTTGTACA	83.5644	121.342	0.706104	64.2146	102.453	32.4603	0.31683	depleted
KRAS CDE Pos	LGALS2	GATGCTGCCTGTGATCTTCA	485.659	524.021	1182.98	1059.08	504.84	1121.03	2.22057		KRAS CDE Pos	LOR	GGCGGTGGCTACTCTGGCGG	182.128	277.532	0	144.697	229.83	72.3484	0.314792	depleted
KRAS CDE Neg	KBTBD3	TTCCTTGTATCAGAAGATCA	118.923	174.924	470.182	177.857	146.924	324.019	2.20536		KRAS CDE Pos	TGOLN2	TTCGGTGGCCAAGAGCGGCA	499.244	261.975	147.576	90.7566	380.609	119.166	0.313093	depleted
KRAS CDE Pos	LMO4	GCTGCTGCCCGGATTCACCA	403.276	350.598	944.666	717.623	376.937	831.144	2.20499		KRAS CDE Pos	CELA3B	GGAAGGATGTCACCAGCCGG	147.845	204.104	1.41221	108.737	175.974	55.0745	0.312969	depleted
KRAS CDE Neg	FAM162A	CTTTACACAAACCTACGGAT	576.678	462.46	979.94	1305.73	519.569	1142.83	2.19958		KRAS CDE Pos	MUC17	GCTTCCTTCAGTATAAGTTG	160.701	360.293	158.873	2.56858	260.497	80.721	0.309873	depleted
KRAS CDE Pos	SCRG1	AACTGTCACAACCTTCCGGA	323.551	201.2	534.278	606.076	262.376	570.177	2.17313		KRAS CDE Pos	CREG1	TTGGTCCACCAAAGTAGTCC	2.14268	0.622268	0	0.856194	1.38247	0.428097	0.309661	depleted
NTC	NTC	TCACACGGGATCTCGCCGGT	98.3276	76.5761	217.669	161.744	87.4519	189.706	2.16927		KRAS CDE Pos	CELA3B	ACCCACAGGCCACACACGAG	188.556	311.134	107.328	47.0907	249.845	77.2093	0.309029	depleted
KRAS CDE Neutral	LARP1B	CTTACAACATCTAAGTGGAG	289.004	203.452	389.309	676.722	246.228	533.016	2.16473		KRAS CDE Neutral	DHH	TGAGAATGGCACCAGCCTGA	201.412	144.366	105.916	0.856194	172.889	53.3859	0.308787	depleted
KRAS CDE Neutral	GLUCM	TCTGGGGTGAGACAACCAGG	154.135	101.351	388.018	163.603	127.743	275.811	2.15911		KRAS CDE Neutral	NOSTRIN	CCTGGCTTGAAAAGAATACA	64.2803	129.432	1.41221	58.2212	96.856	29.8167	0.307846	depleted
KRAS CDE Neg	BICD1	CAGCCCTAAAGTAAGTGGGG	73.7457	157.657	265.849	232.391	115.701	249.12	2.15313		KRAS CDE Neg	BCAR1	CCGCAAGGGTGACATCATGA	201.412	555.686	1.41221	231.172	378.549	116.292	0.307206	depleted
KRAS CDE Neg	ARNTL2	TCTGATGATTGAGAGCTACA	120.916	84.8343	120.019	322.869	102.875	221.444	2.15254		KRAS CDE Pos	SLC28A1	CTCACTGTGCACAGATCGTG	134.989	125.698	79.0836	0.856194	130.343	39.9699	0.306651	depleted
KRAS CDE Neutral	PTP4A2	GAACTTGTTGAGAGTAGCAT	264.422	357.355	283.486	1048.55	310.888	666.017	2.1423		KRAS CDE Neutral	SOS2	TAATCAATTTCAGTAAGAGG	143.559	141.877	0	87.3318	142.718	43.6659	0.305959	depleted
KRAS CDE Pos	CCNG2	CGGATCACATCATGAGTGGA	686.965	524.021	1001.02	1588.93	605.493	1294.98	2.13872		KRAS CDE Pos	CYP2D6	GCTGGGTCAGGAAAGCCTTT	222.838	72.8054	0.706104	89.0442	147.822	44.8752	0.303576	depleted
KRAS CDE Neg	SPACA7	GCTGTACTTGGCATTTCGCT	340.825	345.343	265.849	1191.08	343.084	728.465	2.12328		KRAS CDE Neg	SPINT1	GTGGGGTCATAGTACCAGCG	351.399	281.265	159.58	31.6792	316.332	95.6293	0.302307	depleted
KRAS CDE Neg	GABPA	TAAGCTAAATCAGCCTGAAC	155.464	88.5881	310.157	207.603	122.026	258.88	2.12151		NTC	NTC	GTGGTTACGTTAACGACTAC	1394.88	66.5827	216.068	223.467	730.733	219.767	0.300749	depleted
KRAS CDE Neg	CSGALNACT2	AGAAGAACATTATCAGACCA	175.395	102.852	359.627	228.673	139.124	294.15	2.1143		KRAS CDE Neg	NCR2	GTCCCAGATTGTGAATCGAG	147.845	186.68	0	99.3186	167.263	49.6593	0.296894	depleted
KRAS CDE Neg	KBTBD3	GCTAACACACAACGATGACA	187.354	234.233	422.432	463.543	210.793	442.987	2.10152		KRAS CDE Pos	TCF12	ACGTGTTATAGCCTACCAAG	265.692	296.822	0	166.958	281.257	83.479	0.296807	depleted
KRAS CDE Neg	ARID3B	TCATCAACAAGAAGATCTGG	668.362	512.009	1255.25	1223.31	590.186	1239.28	2.09981		NTC	NTC	CAATATCTAAGCGCTAACGA	154.273	156.812	0.706104	91.6128	155.542	46.1595	0.296765	depleted
KRAS CDE Pos	PPTC7	TTCGTACCTAGTAATCCCAT	466.392	355.854	868.094	849.002	411.123	858.548	2.0883		KRAS CDE Neg	ATP6V1C1	ACTGCTTAATCCAGTCGTTG	27.8548	97.6961	0	36.8164	62.7755	18.4082	0.293239	depleted
KRAS CDE Neutral	CROT	GGCATCTGATCTACAGATTG	364.078	246.996	788.082	487.091	305.537	637.587	2.08678		KRAS CDE Pos	MRGPRX4	ACTCCAGCATACTAAACAGC	244.265	199.126	0	128.429	221.695	64.2146	0.289652	depleted
KRAS CDE Neutral	HSF2BP	GCTGGAGACACCCCACAAGA	75.7389	278.527	383.717	355.093	177.133	369.405	2.08547		KRAS CDE Neutral	DUOXA2	GCTTCCTGCTCATCTTGCCG	96.4204	42.9365	0	40.2411	69.6785	20.1206	0.288763	depleted
KRAS CDE Neg	CEP250	TTGACTATCTTCTTAGTGGC	81.7182	124.624	93.7783	331.544	103.171	212.661	2.06125		NTC	NTC	GGGTGCACACGCCGGCCTAT	57.8523	327.935	70.6104	40.2411	192.894	55.4258	0.287338	depleted
KRAS CDE Neutral	ZNF133	CCTTCTGCTTGATCACTCCA	251.798	438.436	1105.98	311.714	345.117	708.848	2.05393		KRAS CDE Neg	SLC12A6	TGGAGTAATTACCTACCCAA	227.124	303.667	0	151.546	265.395	75.7732	0.285511	depleted
KRAS CDE Neg	DCAF6	GTATTCAGGAGTTCTTCAGA	736.793	894.139	1594.66	1743.86	815.466	1669.26	2.047		KRAS CDE Neutral	CXCR5	CTACCCGCTAACGCTGGAAA	29.9975	0	0	8.56194	14.9987	4.28097	0.285422	depleted
KRAS CDE Neutral	LEO1	AAGGTCATAGATCGGATGGA	235.189	156.155	81.7334	113.407	195.672	97.5701	0.498641		KRAS CDE Neg	RAF1	GCCGAACAAGCAAAGAACAG	377.111	636.58	129.923	155.827	506.846	142.875	0.281891	depleted
KRAS CDE Neutral	FILIP1L	AATATGAGACTCTAGAACGA	93.677	55.5552	0	74.3651	74.6161	37.1826	0.498318		KRAS CDE Pos	PTGIR	GCTGGGCCCAGCGCATGCGG	141.417	205.971	0	97.6062	173.694	48.8031	0.280972	depleted
KRAS CDE Neg	ITPR2	AACCACTCGGGCAGCAAACA	241.833	421.169	118.298	210.701	331.501	164.5	0.496227		NTC	NTC	ATTGTTCGACCGTCTACGGG	3867.53	253.885	744.94	410.973	2060.71	577.957	0.280465	depleted
KRAS CDE Neutral	AXIN2	CTGTCTCTTCCAACACCAGG	239.175	472.219	227.993	124.562	355.697	176.277	0.495582		KRAS CDE Neg	VDAC1	ACTAGGCACCGAGATTACTG	10.7134	19.2903	4.94273	3.42478	15.0018	4.18375	0.278882	depleted
KRAS CDE Neg	TP53I3	GTTCTCTATGGTCTGATGGG	277.045	179.428	183.255	42.1402	228.237	112.698	0.493775		KRAS CDE Pos	SLC24A2	GAGAGATGTGAAAAGTTCTG	126.418	199.126	0	90.7566	162.772	45.3783	0.278785	depleted
KRAS CDE Neg	GLMN	AATATGGGCTGGAATCTCGT	91.6839	177.927	90.3369	41.5205	134.805	65.9287	0.489066		KRAS CDE Neutral	PFKFB2	AAAGCGAGTTCAATCTCTTG	302.117	97.6961	0	111.305	199.907	55.6526	0.278393	depleted
KRAS CDE Neutral	AK1C1	AATGAGCAGAATCAATATGG	270.401	250.749	92.4878	161.124	260.575	126.806	0.486639		KRAS CDE Neg	POFUT1	AGCAGGAAAGACACGCTCAG	177.842	174.235	0	97.6062	176.039	48.8031	0.277229	depleted
KRAS CDE Neutral	PCDH9	GATATCGTGGAAACTCCAGA	296.976	216.215	72.6997	176.617	256.595	124.658	0.485817		KRAS CDE Pos	OCEL1	ACCCGCCAGTGAGCAGTGAG	132.846	28.0021	0	44.5221	80.424	22.2611	0.276796	depleted
KRAS CDE Neutral	NCALD	CCATTGACAAATGTCCACTG	211.936	260.509	49.04	180.335	236.222	114.688	0.485507		KRAS CDE Neg	TAF6	AGACTTTGCTGCCCGCCTGG	844.215	720.587	245.724	185.794	782.401	215.759	0.275766	depleted
KRAS CDE Pos	ADPRHL2	TGTGTCATCTGTGTAGTACA	375.372	354.352	157.444	196.448	364.862	176.946	0.484967		KRAS CDE Neutral	ZNF730	TATGGGAAGTTGTCAAACAC	0	52.8928	0	14.5553	26.4464	7.27765	0.275185	depleted
KRAS CDE Neutral	EDN1	CTAGGGCTTCCAAGTCCATA	271.73	180.179	59.7944	159.265	225.954	109.53	0.484743		KRAS CDE Pos	SIAH2	GGTCAGCTCGTGGTGCTGCG	227.124	112.008	3.53052	88.188	169.566	45.8593	0.270451	depleted
KRAS CDE Pos	GPR141	GTACATGTGGATGTGCAGCA	249.805	313.061	173.791	96.6746	281.433	135.233	0.480515		KRAS CDE Pos	ZBTB4	GACTTACACAGCCAAGCCAG	287.119	276.909	1.41221	149.834	282.014	75.6231	0.268154	depleted
KRAS CDE Pos	TGOLN2	AGAAGACAGCCCCAACAGGT	125.567	87.0866	73.9902	27.8869	106.327	50.9386	0.479075		KRAS CDE Neutral	ACOX3	TCGCCCTGGCAGCATACAAG	389.967	273.798	175.82	0.856194	331.883	88.338	0.266173	depleted
KRAS CDE Pos	YWHAQ	GCTAGAGATGACCCTCCAGG	843.757	831.827	411.678	386.079	837.792	398.878	0.476107		KRAS CDE Neg	GABPA	CCAAAGTACAAAGAGCGCCG	109.277	265.086	0.706104	98.4624	187.181	49.5842	0.264899	depleted
KRAS CDE Neg	MGAT2	AGGCTTCTACCAGATTTGGA	431.844	192.191	182.825	113.407	312.018	148.116	0.474703		KRAS CDE Pos	TMEM65	AAAAAGCCAAACCCTATGAA	254.979	336.025	155.343	0.856194	295.502	78.0995	0.264295	depleted
KRAS CDE Pos	CCDC3	CAGACACTCAAGAGAACAGA	232.532	180.179	169.919	25.4081	206.355	97.6637	0.473279		KRAS CDE Neg	KRT28	TTTGTTGAACAACATGCGAG	297.832	177.346	3.53052	121.58	237.589	62.5551	0.263291	depleted
KRAS CDE Neutral	ZNF195	GCCAGGCCTCAATGTTTCTG	514.891	447.445	256.815	197.687	481.168	227.251	0.47229		KRAS CDE Neutral	GPR139	CATTTCCGCCCACATCAGAA	220.696	499.059	1.41221	186.65	359.877	94.0313	0.261287	depleted
KRAS CDE Pos	LRRN1	AAACGTGGATATCGGCACGA	413.906	443.691	178.093	226.194	428.799	202.143	0.471418		KRAS CDE Neg	NANOG	TGGAGAGTTCTTGCATCTGC	66.423	134.41	0.706104	51.3717	100.416	26.0389	0.259309	depleted
KRAS CDE Neg	DPPA2	ATCATCCTCCTGTGAGTGGT	439.152	391.139	168.629	222.476	415.146	195.552	0.471045		KRAS CDE Neutral	OTOR	GATTCATTAACGTTAAAAAA	486.388	227.128	0.706104	184.082	356.758	92.394	0.258982	depleted
KRAS CDE Pos	ALOX5AP	TCGCTGTGCTCTGGTCTGCG	292.99	140.39	135.935	68.168	216.69	102.052	0.470958		KRAS CDE Pos	GIPC1	TTACATGGGTATCAGGGACA	546.383	627.246	210.419	92.469	586.814	151.444	0.258078	depleted
KRAS CDE Neutral	ELOVL3	TTGCAAGGCAGAAGGACCAG	74.4101	54.0537	9.03369	51.4359	64.2319	30.2348	0.470713		KRAS CDE Neutral	CSN3	AAATAGCCACCCACCCACTG	242.122	258.864	106.622	22.2611	250.493	64.4414	0.257258	depleted
KRAS CDE Neg	ST8SIA4	TTGGTGAAACTTCAGGTAGG	192.669	167.416	130.773	38.422	180.043	84.5977	0.469876		KRAS CDE Pos	RAPGEF3	GGAAGGATATTGGTGCAGAA	119.99	453.011	0.706104	146.409	286.501	73.5577	0.256745	depleted
KRAS CDE Neg	VDAC1	GCCAGGGATGTCTTCACCAA	126.231	201.951	138.517	15.4927	164.091	77.0046	0.46928		KRAS CDE Neutral	EDN1	CTTAGGCGCTGAGCTCAGCG	2.14268	0.622268	0.706104	0	1.38247	0.353052	0.255377	depleted
KRAS CDE Neutral	RP1L1	GGAAGAGTCTTAAAACCCCC	140.848	61.5612	4.30176	90.4775	101.204	47.3897	0.468257		KRAS CDE Pos	GRPEL2	TGCTTACTTGCTCTCCCACG	239.98	185.436	0.706104	107.88	212.708	54.2933	0.255248	depleted
KRAS CDE Pos	BTNL9	TCGTACCCGGAGCCTCTGCG	134.868	144.143	130.343	0	139.506	65.1716	0.467161		KRAS CDE Neutral	TMOD3	AGCATTGGAGCATAAAGACA	188.556	66.5827	0	65.0708	127.569	32.5354	0.255041	depleted
KRAS CDE Neg	WDR93	TGAAATACTCATTGCTCCTG	180.046	286.785	183.685	34.084	233.415	108.884	0.466484		KRAS CDE Pos	NOG	AGATAGTGCTGGCCGCCGGC	231.409	210.327	0.706104	111.305	220.868	56.0057	0.253571	depleted
KRAS CDE Pos	DEF6	ACTCTTCTCCACGTCCAGCG	523.528	375.373	313.598	105.351	449.451	209.474	0.466067		KRAS CDE Pos	YIPF5	CATCCGTTAAAAGTAGCAGA	74.9937	269.442	0	87.3318	172.218	43.6659	0.25355	depleted
KRAS CDE Neg	GFPT2	TGAAGAATATCTGTAAGACA	120.916	289.037	162.176	27.8869	204.977	95.0316	0.463621		NTC	NTC	TTGATAAACCGCGGCCGAAA	203.554	336.025	89.6752	47.0907	269.79	68.383	0.253468	depleted
KRAS CDE Pos	TNFSF9	GGCCAGCCCGAGACTCCGCG	189.347	248.497	84.7446	116.505	218.922	100.625	0.459638		KRAS CDE Neg	PTPN1	GGTGTGGGAGCAGAAAAGCA	53.5669	54.1373	0.706104	26.542	53.8521	13.6241	0.25299	depleted
KRAS CDE Neutral	SRMS	GCTCGTGCCCATCACCCACG	297.64	250.749	248.211	3.71826	274.195	125.965	0.459399		NTC	NTC	TGTATCCACCGTGACCCGGT	362.112	0.622268	0	91.6128	181.367	45.8064	0.252562	depleted
KRAS CDE Pos	HOXD1	AGGTTCGTAGGCCCCCTCCA	200.642	262.761	116.147	96.0549	231.701	106.101	0.457922		KRAS CDE Pos	FEZ2	GCTCCGGGCGGCGATGGCGG	49.2816	42.3142	0	23.1172	45.7979	11.5586	0.252383	depleted
KRAS CDE Pos	NPTXR	CAACGAGATTGTACTGCTAG	208.614	334.833	101.091	146.871	271.723	123.981	0.456277		KRAS CDE Neg	FAM162A	TCTGGTAAGCCTTAGAGATG	259.264	170.501	105.916	1.71239	214.883	53.814	0.250434	depleted
KRAS CDE Pos	PIGR	CCTGCAGCTGACCATCCGAA	197.32	228.227	163.037	30.9855	212.773	97.011	0.455936		KRAS CDE Neg	ARID3B	ATCTGGAGGGAGATCACCAA	72.851	122.587	0	48.8031	97.7189	24.4015	0.249712	depleted
KRAS CDE Pos	GH1	CAACGTCTATGACCTCCTAA	431.18	337.085	252.513	96.0549	384.133	174.284	0.453708		KRAS CDE Neg	NR1H2	GCTGCTGCAACGCCTCCACG	66.423	222.15	0	71.9203	144.286	35.9602	0.249228	depleted
KRAS CDE Pos	MAGOHB	CTGTCGGCCAACCCTATCAG	233.86	157.657	171.64	5.57738	195.759	88.6087	0.452643		KRAS CDE Pos	MFSD5	TAGCTGGGATCCACTCAGCA	182.128	228.995	1.41221	101.031	205.561	51.2216	0.249179	depleted
KRAS CDE Pos	DEF6	GCTGTCCCACAACCTGTACA	376.701	333.331	131.204	187.772	355.016	159.488	0.449241		KRAS CDE Neg	C3orf56	CTGCCTTGGTGCCTTCAGTG	329.972	574.976	104.503	120.723	452.474	112.613	0.248884	depleted
KRAS CDE Neutral	GPR150	GCCACCTACTCTCCGTCTGG	700.252	712.458	369.951	262.757	706.355	316.354	0.447868		KRAS CDE Neg	USF2	CCAGAACACCCCGAGATGAG	152.13	113.253	0.706104	65.0708	132.691	32.8884	0.247857	depleted
KRAS CDE Pos	RERGL	CTTGCTGTCTTGGGTGGTGA	411.249	258.257	101.521	198.307	334.753	149.914	0.447836		KRAS CDE Neutral	NAAA	CCACTGGAAGCCAGCACCCA	85.7071	91.4734	0	43.6659	88.5902	21.833	0.246449	depleted
KRAS CDE Neg	GOLGA6B	ATCGGATACAGGAGCTGGAG	296.976	302.551	94.6386	172.899	299.763	133.769	0.446248		KRAS CDE Pos	NAT16	TCGGTGAACGTGATCGACGC	141.417	150.589	0	71.9203	146.003	35.9602	0.246298	depleted
KRAS CDE Pos	CYP2D6	GATGTAGGATCATGAGCAGG	168.751	206.455	74.8506	92.3367	187.603	83.5936	0.445587		KRAS CDE Neg	FABP4	ACGAAGTCACTGCAGATGAC	83.5644	49.1592	0	32.5354	66.3618	16.2677	0.245136	depleted
KRAS CDE Neg	PKIG	ACAGGAGATGAAGTCCGAGT	146.827	19.5194	73.9902	0	83.1732	36.9951	0.444796		KRAS CDE Neg	SEMA5B	GCAACAGCGAGACAGCCAGG	269.977	406.963	94.6179	71.0641	338.47	82.841	0.244751	depleted
KRAS CDE Neutral	SLC35G3	CTACACCGCCCTGGGCTATG	105.636	51.8015	0	70.0271	78.7186	35.0136	0.444794		NTC	NTC	ACCCATCGGGTGCGATATGG	2457.65	377.717	598.776	94.1814	1417.68	346.479	0.244398	depleted
KRAS CDE Pos	CBWD1	CATCCTCACCATTGACAACG	760.71	806.301	429.315	265.236	783.506	347.275	0.443233		KRAS CDE Neg	TRIM49C	AAGGAGGGACTCTTTCTTCT	593.521	456.123	206.888	48.8031	524.822	127.846	0.243598	depleted
KRAS CDE Pos	GOLGA8O	CCTCTGAATCGCCTACGCCG	405.269	204.954	162.606	107.21	305.112	134.908	0.44216		KRAS CDE Neg	TTBK1	TGTGGCCGGGTTTCGAGGAA	113.562	172.368	2.82442	66.7832	142.965	34.8038	0.243443	depleted
KRAS CDE Neg	SLC16A12	GGTGGTCCCCACTATCTCTG	277.045	305.554	129.053	128.28	291.299	128.666	0.441698		KRAS CDE Pos	C5orf52	TTCACTGGAATTCATTAAGC	141.417	179.836	0	77.9137	160.626	38.9568	0.242531	depleted
KRAS CDE Pos	CDK5R2	GCTGCCTTTCTTCTTCTTGG	595.281	543.54	29.2519	472.838	569.411	251.045	0.440886		KRAS CDE Neutral	ODF2L	ACAGATCCAAATTCATAAAA	295.689	174.235	1.41221	112.161	234.962	56.7868	0.241685	depleted
KRAS CDE Neg	PELI2	TAGTAGTGAGCCCATCCATG	270.401	189.939	80.0127	122.083	230.17	101.048	0.439014		KRAS CDE Neg	P2RY12	TGATAAGTCCAACAAAAAAC	40.7109	72.8054	0	27.3982	56.7581	13.6991	0.241359	depleted
KRAS CDE Pos	RXFP3	TTACACATGGCCTTGCCGAA	157.457	289.788	61.9453	133.857	223.623	97.9012	0.437797		KRAS CDE Pos	GOLGA8O	GGTCTGCCTTCTCCTTCAGG	992.059	960.782	271.85	198.637	976.421	235.244	0.240924	depleted
KRAS CDE Neg	DCAF6	CACAAGAGCGATCAAGATTG	53.8144	216.215	43.0176	74.9848	135.015	59.0012	0.436998		KRAS CDE Neg	IL11RA	GTACCGGATTAATGTGACTG	593.521	334.158	34.5991	187.507	463.84	111.053	0.239421	depleted
KRAS CDE Neg	NR1H2	TCACCCACTGTAAAGGAGGA	314.914	659.155	226.703	197.068	487.035	211.885	0.435051		NTC	NTC	CGAGTAATTATTTGCGGTCG	122.133	126.32	0.706104	58.2212	124.227	29.4637	0.237177	depleted
KRAS CDE Pos	NAGK	TCCTGTGCGTGGGCTCTGTG	324.215	391.89	141.098	169.8	358.052	155.449	0.434151		KRAS CDE Neutral	CABLES2	GTTGTTGAGGAAGAAAAGCG	308.545	291.222	0.706104	141.272	299.883	70.9891	0.236722	depleted
KRAS CDE Pos	CREM	GAACTGTCCTCTGATGTGCC	200.642	276.275	150.131	55.7738	238.458	102.953	0.431743		KRAS CDE Pos	FZD9	GCTGACTGGGCTTTGCTACG	87.8497	63.4714	0.706104	35.104	75.6605	17.905	0.23665	depleted
KRAS CDE Neutral	RP1	GTACGCTACGGACGGAAGGA	152.142	105.104	73.1299	37.8023	128.623	55.4661	0.431229		KRAS CDE Pos	RAPGEF3	GCTCTTTGAACCACACAGCA	79.279	51.026	0	30.823	65.1525	15.4115	0.236545	depleted
KRAS CDE Neutral	ADRB1	GGAAGGGCGAGGTGATGGCG	498.282	299.548	198.741	143.153	398.915	170.947	0.42853		KRAS CDE Neg	ARHGEF11	TTATCAGCAGGCAAGCCCCA	6.42803	113.253	0	28.2544	59.8404	14.1272	0.236081	depleted
KRAS CDE Neg	SLC12A6	GACAGAAACCTATCAGGAGA	152.142	121.621	33.5537	83.6607	136.881	58.6072	0.42816		KRAS CDE Neutral	ZNF775	TCCCGCCACGCCAGACCATG	188.556	176.724	0	85.6194	182.64	42.8097	0.234394	depleted
KRAS CDE Pos	FZD9	GGAGGCGCCCGAGAACGCCA	87.6976	82.5821	72.6997	0	85.1399	36.3498	0.426943		KRAS CDE Pos	CCSER2	CCTGACCACTATCATCACCA	287.119	324.202	4.23662	138.703	305.66	71.4701	0.233822	depleted
KRAS CDE Neutral	C14orf93	GCATGTCCCTCTGAGTTGCT	315.579	372.37	271.011	20.4504	343.974	145.731	0.423667		KRAS CDE Neutral	CXCR5	CATGAACTACCCGCTAACGC	398.538	75.2945	0.706104	109.593	236.916	55.1495	0.232781	depleted
KRAS CDE Neg	OR5C1	ACATCATGGCCACGGCTGTG	246.483	258.257	160.025	53.295	252.37	106.66	0.422634		KRAS CDE Neg	DHX8	AGTGTCCGGTAACCCTCCTG	70.7083	72.1831	0.706104	32.5354	71.4457	16.6207	0.232635	depleted
KRAS CDE Neutral	TSPAN8	GGATACCTGTCGCCACCTGC	550.103	573.57	381.136	89.8578	561.837	235.497	0.419155		KRAS CDE Neutral	TIPARP	GGTTCACCAGCTCAAACACG	126.418	103.297	0	53.0841	114.857	26.542	0.231087	depleted
KRAS CDE Neutral	SOS2	GTGACCTCGTAAAGTACCTG	178.717	151.651	0	138.195	165.184	69.0976	0.418307		KRAS CDE Pos	ITGB4	CTCTGGCCCGAAGCCCTCAG	117.847	48.5369	0.706104	37.6726	83.1921	19.1893	0.230663	depleted
KRAS CDE Pos	NPTXR	GCGCGGCGCTCACCTCCAGG	118.923	162.912	74.8506	42.7599	140.918	58.8052	0.417302		KRAS CDE Pos	IL36RN	GGCTTCCACCCTGGACACCC	68.5656	57.8709	0	29.1106	63.2183	14.5553	0.230239	depleted
KRAS CDE Neg	DCAF6	TCACGTCCCACAACAGGTGT	35.8763	108.107	35.7046	24.1687	71.9919	29.9366	0.415833		KRAS CDE Neutral	GNPNAT1	TGTACTGCTGACTTAAATAG	89.9924	151.833	0	55.6526	120.913	27.8263	0.230135	depleted
KRAS CDE Neg	BLK	TGGTGACCACTGCGTAGAGT	145.498	153.903	72.2695	52.0556	149.701	62.1625	0.415246		KRAS CDE Neutral	ZNF730	GAATTTGAAGACACATGATA	379.254	710.63	115.095	135.279	544.942	125.187	0.229725	depleted
KRAS CDE Neg	OR5T2	CATATTTGGGGTAATAACTG	457.755	424.172	312.738	53.295	440.963	183.016	0.415038		KRAS CDE Neutral	CDH12	AATATTGTTCCAGGAGATGG	297.832	251.396	111.564	13.6991	274.614	62.6318	0.228072	depleted
KRAS CDE Neutral	DUOXA2	ATGAGGACACCCTTACCGAG	294.983	114.113	169.059	0.619709	204.548	84.8394	0.414765		NTC	NTC	CCCATCATTCGCGCTGACGT	128.561	343.492	1.41221	106.168	236.026	53.7902	0.227899	depleted
KRAS CDE Neutral	ZNF775	AACATATTTCAGCAGCACCG	361.42	375.373	238.747	65.6892	368.397	152.218	0.413191		KRAS CDE Pos	SLC28A1	CAGGATTCATTGCGTTCGAG	68.5656	100.807	0	38.5287	84.6866	19.2644	0.227479	depleted
KRAS CDE Pos	TMEM65	GCCCGGCCTCAGGCTGCGCG	122.245	81.8313	0	84.2805	102.038	42.1402	0.412985		KRAS CDE Neg	RCBTB2	TGCCTTGCTTGATAGTTTGT	329.972	485.369	120.744	64.2146	407.671	92.4792	0.226848	depleted
KRAS CDE Neutral	ESF1	CTTCTCTCGAAGAAAAACAA	23.2532	30.7806	0	22.3095	27.0169	11.1548	0.412881		KRAS CDE Neutral	DEFA6	CCACGAGGAGAACAGCAGTG	415.679	479.147	162.404	40.2411	447.413	101.323	0.226463	depleted
KRAS CDE Pos	ALPP	CCTTGGACAGAGCCACATAT	33.8832	50.3	0	34.7037	42.0916	17.3519	0.412241		KRAS CDE Neutral	HADHA	AGTTGGTCTCAAGCAGGGGA	445.677	837.573	10.5916	279.976	641.625	145.284	0.226431	depleted
NTC	NTC	ATAAAGTCCCAGGTGCGCGC	200.642	195.945	111.415	52.0556	198.293	81.7355	0.412195		KRAS CDE Pos	SPSB4	AGCGCATGGTGACTTCACAG	149.987	74.0499	0	50.5155	112.019	25.2577	0.225478	depleted
NTC	NTC	ACCCATCGGGTGCGATATGG	174.066	280.028	56.353	130.759	227.047	93.5558	0.412054		KRAS CDE Pos	OR52E8	GCCACCATCCCCAAAATGTT	400.681	371.494	160.992	12.8429	386.087	86.9173	0.225123	depleted
NTC	NTC	CGAGGATGTACATACGTAAA	130.882	120.119	0	102.872	125.501	51.4359	0.409845		KRAS CDE Neutral	ANGL5	TCTGTCACCAAAACACCGAG	132.846	179.836	0	70.2079	156.341	35.104	0.224535	depleted
KRAS CDE Pos	RTCA	GGATATTACCCAAAAGGGGG	105.636	163.663	91.6274	18.5913	134.649	55.1093	0.409281		NTC	NTC	CAGGGACGTAGCCGCCGTTA	25.7121	62.2268	0.706104	18.8363	43.9695	9.77119	0.222227	depleted
NTC	NTC	GATTGAGAAGCCGCGGTATC	271.065	195.194	160.886	29.746	233.13	95.3159	0.408853		NTC	NTC	CGTTACGTTTCTTGCCAGGA	214.268	267.575	74.1409	32.5354	240.921	53.3382	0.221392	depleted
KRAS CDE Pos	OCEL1	AAGTTGCAGCCCGGGTTTGG	427.194	1448.94	418.561	347.657	938.067	383.109	0.408402		KRAS CDE Neutral	IMPACT	ATCCTCACAATCCTGTAAGA	70.7083	382.073	0	100.175	226.391	50.0874	0.221243	depleted
NTC	NTC	TTATGTGCCTCTCGGCGCAT	226.552	144.894	0.430176	151.209	185.723	75.8196	0.40824		KRAS CDE Neutral	RAD18	AAAGGATACAAGAAAATTGC	53.5669	15.5567	0.706104	14.5553	34.5618	7.6307	0.220784	depleted
NTC	NTC	TGCAACGATGGTTACGGTAC	292.99	286.785	32.2632	203.884	289.887	118.074	0.407309		KRAS CDE Pos	PBXIP1	CAGACCCTCCATGTCCACGT	21.4268	85.873	1.41221	22.2611	53.6499	11.8366	0.220627	depleted
KRAS CDE Neg	RCBTB2	ACCTGATGACCACCTCACAG	49.8282	98.3478	0	60.1118	74.088	30.0559	0.405678		KRAS CDE Pos	TCF3	CTATCCCGCCCCCTTCTACG	113.562	91.4734	0.706104	44.5221	102.518	22.6141	0.220587	depleted
KRAS CDE Neutral	RAB5I	CCGCAGCACCTTACTCCAGA	681.65	641.888	287.357	246.025	661.769	266.691	0.402997		KRAS CDE Neg	TGM3	TCCCTCACCGGCTCATCCAG	44.9962	142.499	0	41.0973	93.7478	20.5487	0.219191	depleted
KRAS CDE Pos	SCRG1	TAGCAGCAAAGTTAGCCCAA	620.527	647.143	160.456	350.136	633.835	255.296	0.402779		KRAS CDE Neutral	LARP1B	CTCGACCTCTAAAGGAACCT	36.4255	54.1373	0	19.6925	45.2814	9.84624	0.217445	depleted
KRAS CDE Pos	CREM	GTAAGTTGGCATGTCACCAG	140.848	51.8015	30.9726	46.4782	96.3246	38.7254	0.40203		KRAS CDE Neutral	PCDH18	CAGGATTTATGAGGAACAGA	325.687	352.204	0	147.265	338.945	73.6327	0.217241	depleted
KRAS CDE Neg	TAF13	CTGACTCAGTATAAGGATTC	46.5063	51.0507	30.5425	8.67593	48.7785	19.6092	0.402005		NTC	NTC	CCGAGCCGAATTGGGCGTGT	79.279	113.875	0	41.9535	96.5771	20.9768	0.217202	depleted
KRAS CDE Neutral	HADHA	TCTTGCACAGGACCTGACCA	370.722	376.875	2.58105	297.46	373.798	150.021	0.401342		KRAS CDE Neg	ASPSCR1	TCAGCAGCTGGCTCAGACTT	83.5644	78.4058	0	35.104	80.9851	17.552	0.216731	depleted
KRAS CDE Neg	HSF2	TGGACAGCACTAGACATGAG	98.3276	75.8254	68.3979	1.23942	87.0765	34.8187	0.399863		NTC	NTC	CGGGCGTCACCTGCTAGTAA	3235.44	135.654	454.025	274.838	1685.55	364.432	0.21621	depleted
KRAS CDE Pos	PPID	TCATTTGGATGGGAAACATG	235.853	221.47	181.534	1.23942	228.662	91.3868	0.399659		KRAS CDE Neg	CD2BP2	ACACTCTTTGGATAGCGATG	321.401	324.202	0	138.703	322.802	69.3517	0.214843	depleted
KRAS CDE Neutral	NLGN1	CTTGCTCCATCAATATCTGG	207.285	102.101	78.292	45.2388	154.693	61.7654	0.399276		NTC	NTC	ATAGATGTCTACGCGCCGTT	1855.56	149.344	334.693	95.8938	1002.45	215.294	0.214767	depleted
KRAS CDE Pos	GFI1	GCGCCGGTACATTCTCTAAA	185.361	223.722	135.935	27.2672	204.542	81.6014	0.398947		KRAS CDE Pos	LRRN1	GGACACTTCGGAAAGCCAAG	327.83	365.271	110.858	37.6726	346.55	74.2654	0.214299	depleted
KRAS CDE Neg	STARD6	AAGTGTATAATATGGTACAC	235.189	330.328	194.009	30.9855	282.759	112.497	0.397856		KRAS CDE Neg	NR1H2	CGATAGTGGATGCCTTCAGG	122.133	154.945	0	59.0774	138.539	29.5387	0.213216	depleted
KRAS CDE Neutral	NOSTRIN	CCTGGCTTGAAAAGAATACA	156.793	141.891	67.9677	50.8162	149.342	59.392	0.397691		KRAS CDE Neg	BICD1	CTTGCAGCACCATCATGTAA	749.937	601.111	0.706104	285.113	675.524	142.909	0.211553	depleted
KRAS CDE Pos	CBWD1	GAGCTCCCGGACCTACCAGG	291.661	330.328	161.746	85.5199	310.995	123.633	0.39754		KRAS CDE Neg	RPE	TGTCTTTAATCAAAGCCCCT	289.261	192.903	0	101.887	241.082	50.9436	0.211312	depleted
KRAS CDE Neg	DPPA2	GGCCTCAACAGAAACAGGAA	574.021	538.285	44.3081	397.853	556.153	221.081	0.397518		KRAS CDE Neutral	RGMA	ACCCCCAACTACACGCACTG	432.821	303.045	134.866	19.6925	367.933	77.2792	0.210036	depleted
KRAS CDE Neutral	MS4A1	TATTACAAGTTCCTGGAAGA	281.695	434.682	125.611	158.026	358.189	141.819	0.395933		KRAS CDE Neutral	XRCC2	TTCTACCTTCAAGTCGGGCA	100.706	189.792	4.23662	56.5088	145.249	30.3727	0.209108	depleted
KRAS CDE Neutral	GOLGB1	GCAGCTATGCAACACCAGAC	31.89	78.0776	43.4477	0	54.9838	21.7239	0.395096		KRAS CDE Neutral	RTN4RL2	GCAGGCTGCTGAGCTGGCAG	293.547	364.027	1.41221	135.279	328.787	68.3455	0.207872	depleted
KRAS CDE Pos	LOR	GGAGTACTTGACGCTCCCAC	132.211	213.212	11.1846	125.181	172.711	68.1829	0.39478		KRAS CDE Pos	CDK7	TAGGATGTATGGTGTAGGTG	113.562	35.4693	0	30.823	74.5156	15.4115	0.206823	depleted
KRAS CDE Pos	GPR141	CCGGTCAGTGACCACCATGG	90.3551	115.615	28.3916	52.6753	102.985	40.5334	0.393586		KRAS CDE Neutral	ZNF705A	CAGCGTTTGTTAACTCACAG	269.977	387.673	2.11831	133.566	328.825	67.8423	0.206317	depleted
KRAS CDE Pos	JAM3	GGAACTGTCTTGCATCATTA	156.793	234.984	120.019	34.084	195.888	77.0515	0.393344		KRAS CDE Pos	SPSB4	GTGCCGGAGATCCATCCGCT	128.561	202.859	0.706104	67.6394	165.71	34.1727	0.20622	depleted
KRAS CDE Pos	ZIC1	AATTGGAAGAGAGCGCACTG	234.525	111.11	61.5151	73.7454	172.818	67.6303	0.391339		KRAS CDE Neg	PREX1	CCATCTGGCAGGCCCCCAGG	169.271	174.235	41.6601	29.1106	171.753	35.3854	0.206024	depleted
KRAS CDE Neg	CCNT2	CAAGAGCTAGAAGGACCCAG	295.647	460.958	198.741	97.2943	378.303	148.018	0.391268		NTC	NTC	ATGTTGCAGTTCGGCTCGAT	1733.43	228.995	270.438	133.566	981.21	202.002	0.20587	depleted
KRAS CDE Neg	RASSF8	TGAAGTCACAACTTGCCAGG	302.955	344.593	168.199	84.2805	323.774	126.24	0.3899		KRAS CDE Neutral	LEO1	AAGGTCATAGATCGGATGGA	89.9924	97.6961	0.706104	37.6726	93.8443	19.1893	0.204481	depleted
KRAS CDE Pos	ZNF799	ACTCACTTCAAACACATGAG	397.297	443.691	175.081	152.448	420.494	163.765	0.389459		KRAS CDE Neutral	IQSEC3	GTGGAACTGCTGAACCACTT	143.559	217.172	0.706104	72.7765	180.365	36.7413	0.203705	depleted
KRAS CDE Neutral	ADRB1	AGAAGGAGCCGTACTCCCAG	580.665	693.69	131.204	364.389	637.177	247.796	0.388897		KRAS CDE Pos	OR2D3	AGAGAAACAGAGATCTGCAA	567.809	444.922	196.297	9.41814	506.366	102.858	0.203129	depleted
KRAS CDE Neg	DHX8	TGCCAAGAAAGACCCGCAGG	103.643	77.3269	22.7993	47.0979	90.4848	34.9486	0.386238		KRAS CDE Pos	NR1H3	CTACAATGTTCTGAGCTGCG	145.702	271.931	1.41221	82.1947	208.817	41.8034	0.200192	depleted
KRAS CDE Neg	HSP90B1	ACAAGCGTACCAAACGGGCA	62.4513	125.375	0	72.506	93.913	36.253	0.386027		KRAS CDE Pos	SLC30A10	CATCTGTAGCAGAATGGCAG	259.264	189.792	81.202	8.56194	224.528	44.882	0.199895	depleted
KRAS CDE Neg	CDV3	GATAACTGGGAAGAAGGTGG	445.132	359.607	175.081	135.097	402.37	155.089	0.385439		KRAS CDE Neg	XKR4	GGTATTCGAAGCCGACAGAG	74.9937	130.676	0	41.0973	102.835	20.5487	0.199822	depleted
KRAS CDE Pos	ZBTB4	GACTTACACAGCCAAGCCAG	338.167	280.779	197.02	40.9008	309.473	118.961	0.384397		KRAS CDE Pos	TMEM246	CCTCATAGCGATTGGCCACA	426.393	777.213	135.572	104.456	601.803	120.014	0.199424	depleted
KRAS CDE Pos	LEPROT	TGGAAAATCAGGACGAATAA	306.942	278.527	67.9677	156.786	292.734	112.377	0.383888		KRAS CDE Pos	CRYAA	AGAGATGCCGGAGTCCAGCA	34.2828	74.6722	0	21.4049	54.4775	10.7024	0.196456	depleted
KRAS CDE Neg	NUDT4	ATGTTCTGTGCTTTCGGTCT	344.811	284.533	81.3032	159.265	314.672	120.284	0.382253		KRAS CDE Neg	EIF4B	TCTGGATTGCTGGGTTCACG	113.562	148.1	0	51.3717	130.831	25.6858	0.196329	depleted
KRAS CDE Neutral	CA8	CTTGCAGTGAAGGTGTCACC	369.393	372.37	43.4477	236.109	370.882	139.778	0.376882		KRAS CDE Neg	IGSF10	AGTTCATTCCGGAAGCACTG	293.547	426.876	0	141.272	360.211	70.636	0.196096	depleted
KRAS CDE Pos	GRPEL2	CTCACCAGCAGTTCTCTGGG	250.47	255.254	180.674	9.29564	252.862	94.9847	0.375639		KRAS CDE Pos	LRP10	CACTGTAGCAGCGCTCACCT	145.702	147.478	0	57.365	146.59	28.6825	0.195665	depleted
KRAS CDE Neg	IDH3A	GTATCAAGCTCATCACCGAG	134.868	63.8134	65.8169	8.67593	99.3409	37.2464	0.374935		KRAS CDE Pos	SLC35B4	TTCCCAAATCAGCTTCAAAG	59.9949	199.126	0.706104	49.6593	129.56	25.1827	0.19437	depleted
KRAS CDE Neutral	WFDC9	TTCTGGAACAAAGATCCCTG	340.16	458.706	249.932	48.3373	399.433	149.135	0.373366		KRAS CDE Pos	ATXN7L2	TCCACTCAGTACACCAGCGC	149.987	383.317	0	103.6	266.652	51.7998	0.19426	depleted
KRAS CDE Neutral	DCAKD	GGATATCCAGAATCACGTAG	334.181	482.73	232.295	72.506	408.455	152.4	0.373114		KRAS CDE Neg	AP4E1	TAACTTTCTGAGACTACTAG	51.4242	50.4037	0	19.6925	50.914	9.84624	0.19339	depleted
KRAS CDE Neutral	PTGIS	CTGCCTGGGGAGGAGTTATG	162.108	88.5881	93.3481	0	125.348	46.6741	0.372356		KRAS CDE Neg	ST8SIA4	GTTGTACAAAGAGCATTTGG	70.7083	122.587	5.64883	31.6792	96.6476	18.664	0.193114	depleted
KRAS CDE Neutral	APEH	GACAGCATCCTCTCCCTCCC	261.1	181.681	1.7207	162.364	221.39	82.0423	0.370578		NTC	NTC	GCCTATGTGAATCGCGAATT	370.683	436.21	20.477	135.279	403.447	77.8779	0.193031	depleted
KRAS CDE Pos	PDZD8	CTGCAATTGCAGATCTTCAG	182.039	54.8045	86.4653	0.619709	118.422	43.5425	0.36769		KRAS CDE Neg	TLN2	AATCGGCCTCAGCAGCCCAG	72.851	91.4734	0	31.6792	82.1622	15.8396	0.192784	depleted
KRAS CDE Neg	POLR1E	GTAACTAGTTCTTTCCCCTG	725.498	759.004	261.117	283.827	742.251	272.472	0.367088		KRAS CDE Neg	RCBTB2	TATCAAGCAAGGCATCTGCG	137.131	169.879	3.53052	55.6526	153.505	29.5916	0.192772	depleted
KRAS CDE Neg	KRTAP4-2	GTATGTCAGTTGGTTTCAAG	449.118	532.279	209.926	148.73	490.699	179.328	0.365454		KRAS CDE Pos	ALDH1L2	TTATCTCTGTCCAAGCTCCA	289.261	481.636	0	147.265	385.448	73.6327	0.191031	depleted
KRAS CDE Neg	CDC40	CGATTTAGTCAAGTGCATGA	110.951	88.5881	0.860351	71.8863	99.7694	36.3733	0.364574		KRAS CDE Neutral	UGT2B4	TATGGCTTATTCGAAACTAC	147.845	156.812	0.706104	57.365	152.328	29.0356	0.190612	depleted
KRAS CDE Neg	STARD6	ATTGTACTCACAGATTTCCA	453.769	331.83	171.64	114.646	392.799	143.143	0.364418		KRAS CDE Neg	ALOXE3	GGCTAACCAACCAGAAGAGG	128.561	72.8054	0.706104	37.6726	100.683	19.1893	0.190592	depleted
KRAS CDE Pos	ATF6	GGTGGAGGAATGTAAAGCAA	157.457	123.873	8.17334	94.1958	140.665	51.1846	0.363875		KRAS CDE Neutral	RABL2A	AGATGGCAAGACCATCCTTG	445.677	248.285	0	131.854	346.981	65.927	0.190002	depleted
KRAS CDE Neg	CDV3	GTATCACTGTAGATTTCTGG	211.936	374.622	110.555	102.872	293.279	106.713	0.363863		KRAS CDE Neutral	ESF1	GAAAAAGAAGGAATTAATAG	17.1414	82.1394	0	18.8363	49.6404	9.41814	0.189727	depleted
KRAS CDE Neg	ACRBP	GCAGAAAGACTCAAACCAGG	162.772	221.47	97.6499	41.5205	192.121	69.5852	0.362194		KRAS CDE Neg	GRK7	AGCCACTCGCTCTTCCTCAG	471.389	565.02	150.4	45.3783	518.204	97.8892	0.188901	depleted
KRAS CDE Neutral	SLC6A12	CATAGTCACAGCCTTGGGGA	62.4513	126.125	67.9677	0	94.2884	33.9839	0.360425		KRAS CDE Neutral	FGF9	TAGTTCCCAACTTCACCTAA	109.277	118.853	0	42.8097	114.065	21.4049	0.187655	depleted
KRAS CDE Pos	DBNDD2	TCACTCGCTCGCAGCTCGCC	112.944	113.363	81.3032	0	113.153	40.6516	0.359261		KRAS CDE Neutral	SLC22A8	GGAGGGCGAGAAGGACGCGG	272.12	595.511	148.282	13.6991	433.815	80.9905	0.186693	depleted
KRAS CDE Neutral	RFWD3	TACTTGTCCTTTAAGCCACG	387.331	308.557	146.26	103.491	347.944	124.876	0.358896		KRAS CDE Neutral	ZNF195	CCTCACACCTCAGTGAACAC	158.558	286.243	2.82442	79.6261	222.401	41.2252	0.185365	depleted
KRAS CDE Neutral	ANGL5	ATACGGGAAATACCTCAAAT	204.628	247.746	69.2583	92.3367	226.187	80.7975	0.357215		KRAS CDE Neutral	HADHA	AACTTCATCCACCAGTGTGG	205.697	316.735	0.706104	95.0376	261.216	47.8718	0.183266	depleted
KRAS CDE Neg	NANOG	ACCTCTTAGATTTCATTCTC	148.156	582.579	24.0898	236.729	365.367	130.409	0.356927		KRAS CDE Pos	PPID	TCATTTGGATGGGAAACATG	66.423	223.394	0.706104	52.2279	144.909	26.467	0.182646	depleted
KRAS CDE Neg	NACA2	GTGCTTGCTGAGATAAATCT	277.045	444.442	88.186	169.181	360.743	128.683	0.356717		KRAS CDE Neg	GFPT2	CAGCGCTCAGACAAAGGCAA	272.12	131.921	0	73.6327	202.02	36.8164	0.182241	depleted
KRAS CDE Pos	UBALD2	TGTTGGGAATGTTGGTTTCT	575.35	361.109	240.468	91.0973	468.229	165.783	0.354063		NTC	NTC	GCTTTCACGGAGGTTCGACG	2059.11	24.2685	266.201	113.018	1041.69	189.609	0.182021	depleted
KRAS CDE Neutral	PTP4A2	TCTACTATCTGATTAGGGGG	685.636	885.13	293.38	262.137	785.383	277.758	0.35366		KRAS CDE Neg	KBTBD12	GCCAGGACCAGTCTGTGGCA	38.5682	196.637	0.706104	41.9535	117.602	21.3298	0.181372	depleted
KRAS CDE Pos	ALDH1L2	TTATCTCTGTCCAAGCTCCA	125.567	213.212	0.430176	117.745	169.389	59.0875	0.348826		KRAS CDE Neg	SEMA5B	TTGATAGTGACCCCCACCAC	79.279	95.8293	0	31.6792	87.5542	15.8396	0.180912	depleted
KRAS CDE Neutral	TSPAN31	CTTCCTTCTCCTTATTGCAG	152.806	135.885	55.4927	44.6191	144.346	50.0559	0.346777		KRAS CDE Neutral	PTGIS	ACGAGGATGAAGGAGAAGCA	117.847	276.287	0	71.0641	197.067	35.5321	0.180304	depleted
KRAS CDE Neutral	MPC2	CCGTTGTACAACCATCCAGC	168.087	295.043	27.1011	133.237	231.565	80.1693	0.346206		KRAS CDE Neutral	TRIM37	TTACAGCCTGTACTACCTGA	415.679	325.446	120.744	12.8429	370.563	66.7933	0.180248	depleted
KRAS CDE Pos	SPSB4	GGGCGTGGCCCACCTTGCCG	190.012	78.8284	1.29053	91.717	134.42	46.5037	0.345959		KRAS CDE Pos	TGOLN2	TGATAACAAGGAGCTCCCCA	139.274	151.833	0	52.2279	145.554	26.1139	0.179411	depleted
KRAS CDE Neutral	APEH	AAAGCCCATCTTGCAAAGCA	233.196	309.307	67.5376	119.604	271.252	93.5707	0.344959		KRAS CDE Neutral	TRPV1	TGGAAGCCACATACTCCTTG	299.975	48.5369	0.706104	61.646	174.256	31.1761	0.17891	depleted
KRAS CDE Neutral	XCL2	GCCAAAGCACTTCTTGAGCA	235.853	183.182	72.6997	71.2666	209.518	71.9831	0.343566		KRAS CDE Neg	SPACA7	GATAATGTTGATGCTGTACT	497.101	425.009	1.41221	163.533	461.055	82.4727	0.178878	depleted
KRAS CDE Pos	PTPN5	ATGCACCGAGTATTGGCCGG	180.046	221.47	137.656	0	200.758	68.8281	0.342841		KRAS CDE Pos	DDAH1	CGTCTTGCTGCACCGAACCC	205.697	532.662	0	131.854	369.179	65.927	0.178577	depleted
KRAS CDE Pos	TCF12	TGAAATATCCAGGAACCAGA	153.471	242.491	57.6435	78.0834	197.981	67.8634	0.342778		KRAS CDE Neg	BLK	AATCATCGACAGTGAATACA	325.687	342.87	0.706104	118.155	334.278	59.4305	0.177787	depleted
KRAS CDE Neutral	PPP3CA	AACAGCTGCAGCCCGGAAAG	233.86	194.443	57.6435	88.6184	214.152	73.131	0.341491		KRAS CDE Neg	ATP6V1C1	TAGCCGAAATGGTAGTTCCA	137.131	307.401	0	78.7699	222.266	39.3849	0.177197	depleted
KRAS CDE Neutral	TLE4	GTAGAAGTTGACTTTGTGCA	257.113	69.0687	61.0849	50.1964	163.091	55.6407	0.341163		KRAS CDE Neg	OR5C1	GGAATAGCAGGCATCCAGCA	0	125.698	0	22.2611	62.8491	11.1305	0.177099	depleted
KRAS CDE Pos	DDX60	TTAACCAGTGAAGTAACAAT	686.3	671.167	122.17	338.981	678.734	230.575	0.339714		KRAS CDE Pos	PBXIP1	GGGACCAGACACACAGGACC	70.7083	88.9844	0	28.2544	79.8463	14.1272	0.17693	depleted
KRAS CDE Neg	NOS1AP	CAGCTTGTGGCAGACCTCAA	71.7526	107.357	0	60.7315	89.5547	30.3658	0.339075		KRAS CDE Pos	NPTXR	CCCAAGATAAGGATCCCATG	379.254	184.814	35.3052	64.2146	282.034	49.7599	0.176432	depleted
KRAS CDE Pos	FZD9	GTGGAGATCCCCATGTGCCG	275.052	418.916	83.4541	151.209	346.984	117.332	0.338147		KRAS CDE Pos	MAP2K2	GATGGATAGCCGGCCTGCCA	267.835	193.525	0	81.3385	230.68	40.6692	0.176302	depleted
KRAS CDE Pos	RTCA	GCATTGAGACCTGCATCAAG	450.447	269.518	107.544	135.097	359.982	121.32	0.337017		KRAS CDE Neg	CLVS1	GACTTCCAATGACAGCAGGA	297.832	221.527	91.0874	0	259.68	45.5437	0.175384	depleted
KRAS CDE Pos	PLXNB2	ACCTGGACCTGACGTCACAG	268.408	256.004	97.2197	79.3228	262.206	88.2712	0.336648		KRAS CDE Neutral	ACTRT3	GAGCCGTTGTCGATCACCAC	396.395	390.162	0	136.991	393.279	68.4956	0.174165	depleted
NTC	NTC	ACGCTATAGTGTACGTCTAA	122.91	60.8104	0.430176	61.3512	91.86	30.8907	0.33628		KRAS CDE Pos	SLC26A9	CCACTGCCACACCATAGGGC	134.989	27.3798	0	28.2544	81.1842	14.1272	0.174014	depleted
KRAS CDE Pos	OR2D3	AGAGAAACAGAGATCTGCAA	329.53	590.087	208.205	100.393	459.808	154.299	0.335572		KRAS CDE Neg	TP53I3	AAAATGTTGCTGGCTCCTGG	402.823	261.975	0	115.586	332.399	57.7931	0.173867	depleted
KRAS CDE Neutral	CSN3	GGGTTTGCATAATATGTGCG	268.408	407.655	223.691	1.23942	338.032	112.465	0.332707		KRAS CDE Neutral	XCL2	TATCATCTAGCAGAAGCCAA	269.977	414.431	0.706104	118.155	342.204	59.4305	0.17367	depleted
NTC	NTC	GCTAAGATTCATCCGAACAC	133.54	189.188	30.1123	76.8439	161.364	53.4781	0.331413		KRAS CDE Neutral	CROT	GCATGGGGCACAATCCCAAA	342.828	367.761	89.6752	33.3916	355.294	61.5334	0.17319	depleted
NTC	NTC	CCCTATATGCGAGATCCATA	358.099	271.77	2.58105	205.124	314.934	103.852	0.329759		KRAS CDE Neutral	EDN1	AGGAGCAGCGCTTGGACCGG	124.275	118.231	0	41.9535	121.253	20.9768	0.173	depleted
KRAS CDE Neutral	DHX57	GAGATTGCAGAGATTCGTCG	45.8419	76.5761	0	40.2811	61.209	20.1406	0.329045		KRAS CDE Pos	SNRPF	GCTTTCCTGTTAGTCCATTG	27.8548	64.7159	1.41221	14.5553	46.2853	7.98376	0.17249	depleted
KRAS CDE Neutral	TRPV1	GCCATGCTCAACCTGCACGA	616.541	727.473	350.163	91.0973	672.007	220.63	0.328315		KRAS CDE Neg	SPG21	GATATGGTCGCTCTATGACG	96.4204	128.187	0	38.5287	112.304	19.2644	0.171538	depleted
KRAS CDE Neg	CINP	AAGCTGTCTTCAACTACCAA	388.66	536.033	35.2744	267.714	462.346	151.494	0.327664		KRAS CDE Neg	NACA2	CTGAGATAAATCTTGGATCT	182.128	246.418	1.41221	71.9203	214.273	36.6663	0.17112	depleted
KRAS CDE Neg	OR5C1	TGGCTTCATCCAGACAGCCA	209.278	183.933	128.623	0	196.606	64.3113	0.327108		NTC	NTC	CGGCCGTAGTGACGAATGGA	44.9962	65.3382	0	18.8363	55.1672	9.41814	0.17072	depleted
KRAS CDE Neutral	ACOX3	GAAGCAGTGACTTTGAAGCA	316.907	356.604	116.147	103.491	336.756	109.819	0.32611		KRAS CDE Neg	DHX8	GAGTTTGGCAAGTTCTTCCG	42.8535	149.967	0	32.5354	96.4101	16.2677	0.168734	depleted
KRAS CDE Neg	OR2L13	ATGTGTGTGAAGATGATTGG	253.127	334.833	119.589	71.8863	293.98	95.7375	0.32566		NTC	NTC	AGTCATCCTCTATGCGCGTA	428.535	595.511	0	168.67	512.023	84.3352	0.16471	depleted
KRAS CDE Pos	MCL1	CTTCGCGCCCACCCGCCGCG	89.0264	57.0567	0.430176	47.0979	73.0415	23.764	0.32535		KRAS CDE Neg	RASSF8	GGCCTCAGTTTAGCTAAGGG	139.274	190.414	0	53.9402	164.844	26.9701	0.16361	depleted
KRAS CDE Neutral	SH3BP5L	AGGCCAGGACCACCTATCGG	170.745	240.99	0.430176	133.237	205.867	66.8338	0.324646		KRAS CDE Neg	STARD6	AGATACATCAGGCTGGAAAG	119.99	125.076	0.706104	39.3849	122.533	20.0455	0.163593	depleted
KRAS CDE Pos	TARBP1	AGGTTATACCATCATTGGAG	184.696	238.737	0.430176	136.956	211.717	68.693	0.324457		KRAS CDE Neutral	INS	GTGTTGGTTCACAAAGGCTG	126.418	114.497	0.706104	38.5287	120.458	19.6174	0.162857	depleted
KRAS CDE Neutral	C14orf159	GCCCTCTGGTGGTCACGATG	304.949	373.121	60.6548	159.265	339.035	109.96	0.324333		KRAS CDE Pos	HLA-DQB1	ACACCGTGTCCAACTCCGCC	512.1	502.17	145.457	19.6925	507.135	82.5749	0.162826	depleted
KRAS CDE Pos	MCL1	GTTTGGCCTCAAAAGAAACG	48.4994	54.8045	0	33.4643	51.652	16.7321	0.32394		KRAS CDE Neutral	LARP1B	CACGCTGAAAACCAGCAATC	154.273	9.33402	16.2404	10.2743	81.8034	13.2574	0.162064	depleted
KRAS CDE Pos	DEF6	GCACATCCCCCATGACCCCG	386.667	364.112	0.860351	242.306	375.389	121.583	0.323886		KRAS CDE Pos	ARHGEF1	TGCCGTTCTCAGAGCTGCTG	96.4204	172.991	0.706104	42.8097	134.706	21.7579	0.161522	depleted
NTC	NTC	CTAATACACCCGGACGGTAC	41.8557	59.309	32.6933	0	50.5823	16.3467	0.32317		KRAS CDE Neutral	LARP1B	CTTACAACATCTAAGTGGAG	134.989	113.253	0.706104	39.3849	124.121	20.0455	0.1615	depleted
KRAS CDE Pos	OBSCN	GCACACGCTCACCATCCGGG	183.368	282.281	70.5488	79.3228	232.824	74.9358	0.321856		KRAS CDE Neg	POP1	AAGAGGTCGCCTAATGTCCC	610.663	683.251	174.408	34.2478	646.957	104.328	0.161259	depleted
KRAS CDE Pos	PBXIP1	GGAAGGTGATGTTTGTGGTG	338.832	495.493	223.261	45.2388	417.162	134.25	0.321817		KRAS CDE Neg	HSF2	AGTTCAGCCAGTTTCGGAAG	124.275	161.79	0.706104	45.3783	143.032	23.0422	0.161098	depleted
KRAS CDE Neutral	OR7D2	CTCTTCCCAGAAAATCTCCG	210.607	236.485	67.9677	75.6045	223.546	71.7861	0.321125		KRAS CDE Pos	OR2D3	GCTTGCAGACAGCCACATAC	447.819	543.24	103.091	56.5088	495.53	79.8	0.16104	depleted
KRAS CDE Neutral	AXIN2	GCTTCCGTGAGGATGCCCCG	171.409	190.69	32.6933	83.041	181.049	57.8672	0.319621		KRAS CDE Neutral	C14orf93	GCCTCTCAAGGAAAGTCCCG	207.84	133.165	0	54.7964	170.503	27.3982	0.160691	depleted
KRAS CDE Neutral	PFKFB2	GTCATGCCGAAAGAAGTCGT	67.7663	93.8433	51.6211	0	80.8048	25.8105	0.319418		NTC	NTC	TCAACTATGAACCGCCGTGC	239.98	466.701	0.706104	112.161	353.34	56.4338	0.159715	depleted
KRAS CDE Neg	C10orf99	CCATCTTCTCCACAGAAGGT	433.837	546.543	181.964	130.759	490.19	156.361	0.318981		KRAS CDE Neutral	DNAH9	TGTTTCCTACCGCAAAGCAT	563.524	683.873	162.404	36.8164	623.698	99.6101	0.159709	depleted
NTC	NTC	GGGACGCTCATCGAGTGACG	232.532	240.99	3.01123	147.491	236.761	75.251	0.317836		KRAS CDE Pos	CYP1B1	GTGGCCACTGATCGGAAACG	340.686	212.193	0.706104	87.3318	276.44	44.019	0.159235	depleted
KRAS CDE Pos	CYP1B1	GGTCACCCATACAAGGCAGA	133.54	183.182	78.292	22.3095	158.361	50.3007	0.317634		KRAS CDE Neutral	FGR	GCGGCTACTACATCACCACA	602.092	686.984	1.41221	203.774	644.538	102.593	0.159173	depleted
KRAS CDE Neg	CD200R1	GTAATACCCGTCATGAGTGA	46.5063	180.93	0	71.8863	113.718	35.9431	0.316072		NTC	NTC	ACGGTCCCAACGAGCGCCGG	184.27	133.165	0.706104	49.6593	158.718	25.1827	0.158663	depleted
KRAS CDE Pos	MEOX2	GCCTCCAGCCCGACTCTGGA	96.3345	109.609	64.9565	0	102.972	32.4783	0.315409		KRAS CDE Neg	BZW1	CAGCTGCTGCTGTTCTTGAA	188.556	385.806	0	90.7566	287.181	45.3783	0.158013	depleted
KRAS CDE Neg	PAX1	GGCGTGTACAGCGCCCCGGG	205.292	116.366	52.4814	48.957	160.829	50.7192	0.315361		KRAS CDE Neg	ALOXE3	TGTTGACGTCTACCATGCAG	325.687	705.03	158.167	4.28097	515.358	81.2241	0.157607	depleted
KRAS CDE Neutral	KERA	TGATTTCATTTCCATCCAGA	427.194	267.266	92.4878	125.801	347.23	109.144	0.314329		KRAS CDE Pos	PAPOLG	GGTGTGTACTCCAAGCCTAT	199.269	497.192	65.6677	43.6659	348.231	54.6668	0.156984	depleted
KRAS CDE Pos	MRGPRX4	GTAATGGCAAACGTATAATC	366.735	358.857	128.623	97.9141	362.796	113.268	0.312209		KRAS CDE Pos	BTNL9	GCTCAAGAGGAGATTCTGGA	72.851	96.4516	0	26.542	84.6513	13.271	0.156773	depleted
KRAS CDE Pos	SIAE	GGACCAGTTACAGAATCGTA	293.654	280.028	52.0512	127.04	286.841	89.5458	0.312179		KRAS CDE Pos	ATAD3A	GATGCTGCGAGTGGAGGCCG	246.408	306.778	3.53052	83.0509	276.593	43.2907	0.156514	depleted
KRAS CDE Neutral	ZNF133	GATCAAGCAGAAGGTCCTGA	118.259	35.2851	0	47.7176	76.772	23.8588	0.310775		KRAS CDE Neutral	KCTD1	ACTTAAGTAAATCCATGTCG	49.2816	176.102	0	35.104	112.692	17.552	0.155752	depleted
NTC	NTC	ACGGTCCCTCTCGGGTCAAT	295.647	354.352	43.0176	158.646	325	100.832	0.310251		KRAS CDE Neg	PELI2	TTTGTCAAGGAATCAGACTG	599.949	371.494	1.41221	149.834	485.722	75.6231	0.155692	depleted
KRAS CDE Neutral	VAC14	GATGCCCTGCCAAAGCAGGA	103.643	146.396	52.0512	25.4081	125.019	38.7297	0.30979		KRAS CDE Pos	RERGL	CTTGCTGTCTTGGGTGGTGA	192.841	164.901	0	55.6526	178.871	27.8263	0.155566	depleted
KRAS CDE Neg	RNMT	ACAGTGTCAGCAGCGGTATG	229.21	279.278	67.9677	89.2381	254.244	78.6029	0.309164		KRAS CDE Neutral	NAGPA	GTCGCACTTCAGGGACCGCG	29.9975	58.4932	0	13.6991	44.2453	6.84956	0.154809	depleted
KRAS CDE Neg	DDX23	CCAGAACCACATAGGTACAG	146.163	159.909	68.3979	26.0278	153.036	47.2129	0.308509		KRAS CDE Neutral	ATP5L2	AGCAGCATTCACCAGTGCTG	599.949	558.175	97.4424	81.3385	579.062	89.3904	0.154371	depleted
KRAS CDE Pos	YWHAQ	CCGAGGACTCACCAGCACCG	174.731	211.71	54.6323	64.4498	193.221	59.541	0.30815		KRAS CDE Pos	CNRIP1	CTGCGCATCCAGCCTAATGA	72.851	166.146	0.706104	35.9602	119.498	18.3331	0.153418	depleted
KRAS CDE Neg	REV3L	CAATGTATGAAGCTTCTGGA	112.944	243.993	0	109.689	178.468	54.8443	0.307306		KRAS CDE Neg	NANOG	CATCAGGGAGATACAACAGA	72.851	56.0041	0	19.6925	64.4276	9.84624	0.152826	depleted
KRAS CDE Pos	C6orf223	GGATGCTCTGACCATCAGTA	189.347	210.96	41.727	80.5622	200.153	61.1446	0.305489		KRAS CDE Neg	XYLT1	GGGAGATCGGCGGATCCCAG	68.5656	138.144	0.706104	30.823	103.355	15.7646	0.152529	depleted
KRAS CDE Pos	GH1	GAATAGACTCTGAGAAACAG	87.0332	84.8343	52.4814	0	85.9338	26.2407	0.30536		NTC	NTC	CGCTTCGTCTCTCGCAAACA	606.377	0	0	92.469	303.189	46.2345	0.152494	depleted
NTC	NTC	GCCCGATAGAATTACCCATT	296.976	268.016	172.07	0	282.496	86.0351	0.304553		KRAS CDE Neg	VAPA	GCTTCCATATCTGAAGTGTT	107.134	101.43	0	31.6792	104.282	15.8396	0.151892	depleted
KRAS CDE Neg	RDM1	CCAGAAGCTTGCTATTCAGA	288.339	179.428	0	141.294	233.884	70.6469	0.30206		KRAS CDE Pos	HLA-DQB1	GTGCTACTTCACCAACGGGA	126.418	82.7617	0	31.6792	104.59	15.8396	0.151445	depleted
KRAS CDE Neg	TRIM49C	CCAATCTACTTCCAGCACCA	144.834	192.942	80.4428	21.0701	168.888	50.7565	0.300534		KRAS CDE Pos	LRRN1	CATTGGAAATAAGATAACTG	14.9987	0	1.41221	0.856194	7.49937	1.1342	0.15124	depleted
KRAS CDE Neg	LENG8	CCCGTCCACCGTGCGCCCTG	146.827	137.387	0.860351	84.2805	142.107	42.5704	0.299566		NTC	NTC	TCGGAATTCCGCAGGCCGAG	321.401	217.794	43.7784	37.6726	269.598	40.7255	0.15106	depleted
KRAS CDE Pos	EREG	ATTGACACTTGAGCCACACG	153.471	154.654	92.0576	0	154.062	46.0288	0.298767		KRAS CDE Pos	EID2	TGCCTAAAACGCTAAGTGGG	51.4242	38.5806	0.706104	12.8429	45.0024	6.77451	0.150537	depleted
KRAS CDE Neg	MAP2K1	AACATCCTAGTCAACTCCCG	424.536	524.772	138.517	145.012	474.654	141.764	0.298669		KRAS CDE Neg	RDM1	CCTTCCTCCACCTTATCCAT	612.805	456.745	160.286	0	534.775	80.1428	0.149863	depleted
KRAS CDE Neutral	FGF9	TAGTTCCCAACTTCACCTAA	148.82	93.8433	0.430176	71.8863	121.332	36.1582	0.298011		KRAS CDE Pos	HIST3H2A	CGCCCCGGTCTATCTGGCCG	209.982	156.189	0	54.7964	183.086	27.3982	0.149647	depleted
KRAS CDE Pos	CDKN1C	CTGGGATTACGACTTCCAGC	64.4445	73.5731	0	40.9008	69.0088	20.4504	0.296345		KRAS CDE Pos	ARHGEF1	GGTTCCCGTCAGCATCATCG	207.84	104.541	14.1221	32.5354	156.19	23.3287	0.149361	depleted
KRAS CDE Neutral	TEX29	TAGTCACAAATGTCATACAG	145.498	175.675	92.4878	2.47884	160.586	47.4833	0.295687		KRAS CDE Pos	FN1	GCTCGATGTGGTCTGCACAG	473.532	356.56	7.06104	116.442	415.046	61.7517	0.148783	depleted
KRAS CDE Neg	CD200R1	AGCAAGGAGAATCATGCTTT	142.841	197.446	79.5825	20.4504	170.144	50.0164	0.293966		KRAS CDE Neg	LZTFL1	ACATCTCTGAACTTGAAAAC	308.545	491.592	0.706104	118.155	400.069	59.4305	0.148551	depleted
KRAS CDE Neutral	WFDC12	AACTCCTTCCACAGCCACCA	447.125	435.433	149.701	109.689	441.279	129.695	0.293907		KRAS CDE Pos	MEOX2	TATGGTCAGATCTTCCATGG	160.701	24.2685	0	27.3982	92.4846	13.6991	0.148123	depleted
KRAS CDE Pos	FEZ2	TGCCATTAAGGAGTACTCTG	245.819	153.152	70.1186	47.0979	199.486	58.6083	0.293797		NTC	NTC	GTATCCTCCTTACGGCCCGT	1707.71	231.484	139.809	147.265	969.598	143.537	0.148038	depleted
KRAS CDE Pos	TAS2R9	GCTGAAGCTAAAGATCAACA	73.0813	156.906	65.3867	1.85913	114.994	33.6229	0.292389		KRAS CDE Neutral	VAC14	CACCGTGGACTTCCTCGCAG	109.277	18.0458	0	18.8363	63.6611	9.41814	0.147942	depleted
KRAS CDE Pos	PIGR	ACTCAGGAGACATCCCTCGG	150.149	231.23	35.2744	76.2242	190.689	55.7493	0.292357		KRAS CDE Neutral	GHR	CGCAATGCAGATATTCAGAA	100.706	79.6503	0	26.542	90.1781	13.271	0.147165	depleted
KRAS CDE Pos	PLXNB2	TGACGTGCATGTCCACGAGG	297.64	287.536	0.430176	170.42	292.588	85.4251	0.291964		KRAS CDE Pos	GMPPA	CCTGCAAAGTGGCTCCATGG	332.115	386.429	15.5343	89.9004	359.272	52.7174	0.146734	depleted
NTC	NTC	CGCTTCATTGCCCGAACGCT	122.91	41.291	47.3193	0.619709	82.1003	23.9695	0.291954		KRAS CDE Neutral	RFWD3	ATGTATGACAGGGAGACCAG	96.4204	92.0957	0	27.3982	94.2581	13.6991	0.145336	depleted
KRAS CDE Neg	FABP4	CATGCCAGCCACTTTCCTGG	163.436	115.615	48.6098	32.8446	139.526	40.7272	0.291898		KRAS CDE Pos	TRIM24	AAATCAGCTACAAAATCTTC	259.264	358.427	0.706104	89.0442	308.845	44.8752	0.1453	depleted
KRAS CDE Pos	ATF6	CTTCTTGCGAGACTGACAAG	49.8282	58.5582	0	31.6052	54.1932	15.8026	0.291597		KRAS CDE Neg	LTF	CTTATCCATCCGAGACACCA	677.086	622.268	54.37	134.423	649.677	94.3963	0.145297	depleted
KRAS CDE Neg	TP53I3	GCTCCTCATGCCTATCCCAG	63.7801	165.915	56.353	10.5351	114.848	33.444	0.291204		KRAS CDE Pos	CREM	CCTACTGCTGCTTTGCCACA	167.129	539.507	67.0799	35.104	353.318	51.0919	0.144606	depleted
KRAS CDE Neutral	KCNAB3	AGGGCCTGGCCCTATACTGG	435.166	385.884	11.6147	226.814	410.525	119.214	0.290394		KRAS CDE Neutral	ZNF195	GCCAGGCCTCAATGTTTCTG	561.381	504.037	0.706104	153.259	532.709	76.9825	0.144511	depleted
KRAS CDE Pos	PLXNB2	GTCCTCGTAGAACAGGCGGA	336.174	244.743	166.908	0	290.459	83.4541	0.287318		KRAS CDE Pos	RTCA	CAGCAGATACCAAGACAGCA	314.973	326.691	91.7935	0	320.832	45.8968	0.143055	depleted
KRAS CDE Neutral	SRMS	GCTCCAAGATCCCGGTCAAG	202.635	109.609	59.7944	29.746	156.122	44.7702	0.286765		KRAS CDE Neutral	AARD	CCAGTAAAGTTCTAGCCAGC	171.414	308.645	0	68.4956	240.03	34.2478	0.142681	depleted
KRAS CDE Neutral	DGCR6	GCACAGGCAGGTTATGGGGC	358.763	304.803	145.83	43.9994	331.783	94.9144	0.286074		KRAS CDE Pos	MAGOHB	TAGGAGCTTGAAATTGTAAT	124.275	116.364	0	34.2478	120.32	17.1239	0.14232	depleted
KRAS CDE Neg	CD2BP2	ATATAAGTGGGAGAACACGG	130.882	66.8164	56.353	0	98.8492	28.1765	0.285045		KRAS CDE Pos	CRYAA	CGATGTGAAGCACTTCTCCC	164.986	74.6722	4.94273	29.1106	119.829	17.0267	0.142091	depleted
NTC	NTC	ATTGTTCGACCGTCTACGGG	101.65	221.47	66.6772	25.4081	161.56	46.0426	0.284988		KRAS CDE Pos	TAS2R9	GCTTCAGCCAGAAGAAAAAT	372.826	247.04	1.41221	86.4756	309.933	43.9439	0.141785	depleted
KRAS CDE Pos	DEPDC1B	TGGCCTCTGTCAGCTGTCTG	130.882	274.773	88.6162	26.6475	202.828	57.6318	0.284142		KRAS CDE Pos	NOG	AGACCCTATCTTTGACCCCA	152.13	47.2924	0	28.2544	99.7112	14.1272	0.141681	depleted
KRAS CDE Neutral	C1orf87	CTTGAGTTCTCTTCTGACCA	301.627	352.851	120.019	65.0695	327.239	92.5442	0.282803		KRAS CDE Neutral	UBN1	GAGCTGGTGAAGAATATCCG	32.1401	124.454	0.706104	21.4049	78.2969	11.0555	0.141199	depleted
KRAS CDE Pos	RERGL	GTCTTGGGTGGTGAAGGAAC	333.517	442.19	67.5376	151.829	387.853	109.683	0.282796		KRAS CDE Neg	LTA4H	CACATGAAATATCTCATAGC	171.414	230.239	4.94273	51.3717	200.827	28.1572	0.140206	depleted
NTC	NTC	CGAATCGGGAAGGCGCGTGT	114.937	102.101	0	61.3512	108.519	30.6756	0.282674		KRAS CDE Neutral	PTGIS	TGACCGCATAACTCCTCCCC	216.41	270.064	2.11831	65.927	243.237	34.0226	0.139874	depleted
KRAS CDE Neutral	C3orf38	CCAGTAGGCCAAGTAGGTTA	663.712	637.384	254.234	113.407	650.548	183.82	0.282562		NTC	NTC	CATTACGTGTCGAGCTCCGG	21.4268	76.539	0	13.6991	48.9829	6.84956	0.139836	depleted
KRAS CDE Neutral	KIF3B	CCTCCAAGAAGAACACATCA	407.262	146.396	132.494	22.9292	276.829	77.7117	0.280721		KRAS CDE Pos	RBP1	CAGAGCCCCCTGTCCCCGGA	113.562	156.189	0	37.6726	134.876	18.8363	0.139657	depleted
KRAS CDE Neg	BLK	AATCATCGACAGTGAATACA	550.768	446.694	187.987	91.717	498.731	139.852	0.280416		KRAS CDE Neg	C3orf56	CGGAGGCCTCGAAGGCACGG	456.39	285.621	0	103.6	371.006	51.7998	0.13962	depleted
KRAS CDE Neg	ITGAM	TGGTGTGGCACGTACTCGAG	75.0745	71.3209	9.89404	30.9855	73.1977	20.4398	0.27924		KRAS CDE Neg	RNMT	TGATCCTGAAATTGTCCCAG	368.54	387.673	0	105.312	378.107	52.656	0.139262	depleted
KRAS CDE Pos	GFI1	CCGGTACATTCTCTAAACGG	87.6976	141.14	63.2358	0.619709	114.419	31.9278	0.279043		KRAS CDE Neutral	ZCCHC6	CATAAGCTGCACACTACCGT	347.114	34.847	4.23662	48.8031	190.98	26.5199	0.138862	depleted
KRAS CDE Neutral	CA8	AAAGTGTTAGGATTAAAGCA	363.414	560.057	46.8891	209.462	461.735	128.175	0.277595		KRAS CDE Neutral	SRMS	TTGCAGCTGGTACTTTAGCG	85.7071	67.8272	0.706104	20.5487	76.7672	10.6274	0.138437	depleted
KRAS CDE Neg	NCOA6	AACTGTGGCCTCTGAAAGTG	192.005	125.375	0.430176	87.379	158.69	43.9046	0.27667		NTC	NTC	TAGTTAACCGTAAAGTGGGC	85.7071	87.7398	0	23.9734	86.7234	11.9867	0.138218	depleted
KRAS CDE Pos	SLC28A1	GAGAGCCAGAAGCTTCTGCA	170.745	374.622	71.4092	78.7031	272.683	75.0561	0.27525		KRAS CDE Neutral	ANP32A	CGAGATATGTGAGTTGCGGG	96.4204	71.5608	0	23.1172	83.9906	11.5586	0.137618	depleted
KRAS CDE Pos	SPSB4	CGGCAAGAACCAGCCCGGCG	326.209	370.869	83.8842	107.829	348.539	95.8568	0.275025		KRAS CDE Neg	GFPT2	ATAACCTACATGCACTCAGA	284.976	69.0718	16.9465	31.6792	177.024	24.3128	0.137342	depleted
KRAS CDE Neg	SPINT1	CTTCATCAACTACCTCACGA	356.105	168.167	20.2183	123.942	262.136	72.0801	0.274972		KRAS CDE Neutral	HAL	CTTTGGCTGGGTATTCACCA	188.556	365.271	1.41221	74.4889	276.913	37.9506	0.137048	depleted
KRAS CDE Neutral	AFP	GTACATGAGCACTGTTGCAG	88.362	150.149	64.9565	0.619709	119.256	32.7881	0.27494		KRAS CDE Neg	WDR93	CTTTGGCAGAAACATCCCTG	203.554	129.432	0.706104	44.5221	166.493	22.6141	0.135826	depleted
KRAS CDE Neutral	RFWD3	GGTATAGGTGCATTTCCACG	327.537	277.776	62.8056	103.491	302.657	83.1485	0.274729		NTC	NTC	CCCTATATGCGAGATCCATA	3490.42	257.619	240.075	267.989	1874.02	254.032	0.135555	depleted
KRAS CDE Pos	C27C1	GCTGACTGTGGAATACATCG	257.113	204.954	48.6098	78.0834	231.034	63.3466	0.274188		KRAS CDE Pos	OCEL1	CAGTAAATGCACAACCCGGA	171.414	317.357	0	65.927	244.385	32.9635	0.134883	depleted
KRAS CDE Pos	TARBP1	GAGCCTGCGCGGACGCCCCG	162.108	105.104	73.1299	0	133.606	36.5649	0.273677		KRAS CDE Neg	KAT8	GCGGTAGATCTCTTTCCCGG	152.13	263.842	10.5916	45.3783	207.986	27.9849	0.134552	depleted
KRAS CDE Neutral	PER1	CGACTGCCGCCAGAGCGCCG	449.118	336.334	145.83	68.7877	392.726	107.309	0.27324		KRAS CDE Pos	MRVI1	GAGTCCTGAGGAACCTGAAG	2.14268	36.0916	0	5.13717	19.1171	2.56858	0.13436	depleted
KRAS CDE Neg	EXOC3	ACTTCCTTATAATTTCCAGG	767.354	733.479	207.775	198.927	750.417	203.351	0.270984		KRAS CDE Neg	MAP3K2	CTGTATCAACATCATAACAG	171.414	73.4277	2.82442	29.9668	122.421	16.3956	0.133928	depleted
KRAS CDE Neg	SLC1A3	CAGGAAGAGAATACCCACGG	9.96564	118.618	0	34.7037	64.2918	17.3519	0.269892		KRAS CDE Pos	MEOX2	ACAGCAAACCCAGGAAAGAA	70.7083	12.4454	0	11.1305	41.5768	5.56526	0.133855	depleted
KRAS CDE Pos	AGFG1	GGAAGTATACGCATTACTGG	119.588	117.116	62.3755	1.23942	118.352	31.8074	0.268753		KRAS CDE Pos	SIAH2	GAGAAACAAGAGAAGTACGA	109.277	286.243	1.41221	51.3717	197.76	26.3919	0.133454	depleted
KRAS CDE Neg	TRIM49C	AAGGAGGGACTCTTTCTTCT	322.222	280.028	52.4814	109.069	301.125	80.7751	0.268244		KRAS CDE Neg	KBTBD3	GAGATTACATCAGTTATCTG	156.415	344.737	0	66.7832	250.576	33.3916	0.133259	depleted
KRAS CDE Neutral	IQSEC3	TTCATCCCGGACACCCCCAT	387.996	253.001	30.5425	140.054	320.499	85.2984	0.266143		KRAS CDE Pos	SIAH2	GGCAGCAGCTCAACTTCTGG	353.542	356.56	0	94.1814	355.051	47.0907	0.132631	depleted
KRAS CDE Pos	TAS2R9	AGACTGGGTAGTACACGATG	185.361	94.594	74.4204	0	139.977	37.2102	0.26583		KRAS CDE Pos	ATF6	CTTCTTGCGAGACTGACAAG	42.8535	118.853	0	21.4049	80.8534	10.7024	0.132368	depleted
KRAS CDE Pos	MLYCD	GCATCCTGTAAAAAACTGGA	231.203	335.584	83.4541	66.9286	283.393	75.1913	0.265325		KRAS CDE Neg	BMPR1A	TCTTCGTATGACGGATCACT	77.1364	116.986	0	25.6858	97.0614	12.8429	0.132317	depleted
KRAS CDE Pos	SERPINH1	CTAGGGCTCGTGTCGCTGGG	164.101	158.407	84.3144	1.23942	161.254	42.7769	0.265276		KRAS CDE Neutral	COMMD7	GAGCAGCGAATTGGAGAAAG	74.9937	88.3621	0	21.4049	81.6779	10.7024	0.131032	depleted
KRAS CDE Neutral	SLC6A6	ATGGACCAAAATGTGGGCAG	460.412	603.6	81.7334	199.546	532.006	140.64	0.264358		KRAS CDE Pos	GRPEL2	TAGCTGATTGTGAAAACATA	434.963	357.804	16.2404	87.3318	396.384	51.7861	0.130646	depleted
KRAS CDE Neg	YWHAZ	GGGTCAGGATAACAACCTGT	47.1707	44.294	0	24.1687	45.7324	12.0843	0.26424		KRAS CDE Pos	YIPF5	GCAGATTTACCAGCCAACTC	152.13	147.478	1.41221	37.6726	149.804	19.5424	0.130453	depleted
KRAS CDE Neutral	C1orf87	GGCATTGCATCTGATCCACG	1.99313	20.2701	2.15088	3.71826	11.1316	2.93457	0.263624		KRAS CDE Neutral	DGCR6	CCATAACCTGCCTGTGCTTC	1109.91	1333.52	25.4197	292.818	1221.71	159.119	0.130243	depleted
KRAS CDE Pos	DEF6	GGGGAAGACGTCCCTACACA	170.08	160.66	0.430176	86.7593	165.37	43.5947	0.263619		KRAS CDE Pos	PTPN5	CCTCGGAGTCATCAGCAGCG	147.845	225.883	0.706104	47.9469	186.864	24.3265	0.130183	depleted
NTC	NTC	ACTTTACATCATGTCGTCGT	300.298	433.931	129.053	64.4498	367.115	96.7512	0.263545		KRAS CDE Neutral	SOS2	TTAATTGGTGACTATAAAAA	387.824	274.42	1.41221	84.7632	331.122	43.0877	0.130126	depleted
KRAS CDE Neg	ASPSCR1	AGACTTCGTGAGGAGCCACC	134.204	121.621	0.430176	66.9286	127.912	33.6794	0.2633		KRAS CDE Neutral	SLC9B1	TGATCCTAATAATACTGCAC	272.12	161.167	0.706104	55.6526	216.644	28.1794	0.130072	depleted
KRAS CDE Neutral	TRIM37	TTACAGCCTGTACTACCTGA	235.853	230.479	0	122.702	233.166	61.3512	0.263122		NTC	NTC	AGCACTAGGATCGCGGCCTT	614.948	77.1613	0	89.9004	346.055	44.9502	0.129893	depleted
KRAS CDE Neg	ID1	TTACTCACGCCTCAAGGAGC	59.7938	69.8194	0	34.084	64.8066	17.042	0.262967		KRAS CDE Pos	FOXG1	GCTTGTTCTCGCGGTAGTAA	664.23	499.681	0.706104	149.834	581.956	75.2701	0.12934	depleted
NTC	NTC	ACCCTAGCCTCATCGCGACC	519.542	596.843	108.834	184.673	558.193	146.754	0.262909		KRAS CDE Pos	CC056	TGAGGCTGCCAGAGTCCCGT	190.698	249.53	0	56.5088	220.114	28.2544	0.128363	depleted
KRAS CDE Neg	TTC26	TTTGGGCATTACCTCCAACA	524.857	527.775	117.008	159.265	526.316	138.137	0.262459		KRAS CDE Neutral	SOS2	AATATTCTGAAGACCGAAGA	353.542	307.401	64.2555	20.5487	330.471	42.4021	0.128308	depleted
KRAS CDE Pos	EN1	TCGGCCGTGAACGCGGTCCG	108.293	246.996	18.0674	74.9848	177.644	46.5261	0.261906		KRAS CDE Pos	LBH	TGGCCGATCTCAGATAGTCG	2.14268	37.9584	0	5.13717	20.0505	2.56858	0.128106	depleted
KRAS CDE Neutral	AHCY	GAGGTTGTGGACCCCAGTCG	102.978	173.422	0	71.2666	138.2	35.6333	0.257838		KRAS CDE Neg	BORA	ATAGTGGTGGTACTCAGTAT	169.271	189.792	2.11831	43.6659	179.532	22.8921	0.12751	depleted
KRAS CDE Neg	C3orf56	TACCCACCATAGAGCACCCA	216.587	175.675	39.5762	61.3512	196.131	50.4637	0.257296		KRAS CDE Neutral	ALOX15B	TGCCGAGTTCTCCTTCCATG	252.836	443.677	1.41221	87.3318	348.257	44.372	0.127412	depleted
KRAS CDE Pos	C5orf52	GCGCTGGTAGTTCGAACCCG	88.362	158.407	62.8056	0.619709	123.385	31.7127	0.257023		KRAS CDE Neutral	OR7D2	CTCTTCCCAGAAAATCTCCG	342.828	481.636	0	104.456	412.232	52.2279	0.126695	depleted
KRAS CDE Neg	OLFM4	GAAGGGCTAGGAGAAATGAG	150.149	121.621	0	69.4074	135.885	34.7037	0.25539		KRAS CDE Neg	IL11RA	TGTGACTGAGGTGAACCCAC	87.8497	60.9823	0	18.8363	74.416	9.41814	0.126561	depleted
KRAS CDE Neg	YWHAZ	GAGCCCGTAGGTCATCTTGG	293.654	265.013	137.656	4.95767	279.334	71.3069	0.255275		KRAS CDE Neg	TCF7L2	CTAACCATCCTAGCGGATGG	353.542	127.565	0	60.7898	240.553	30.3949	0.126354	depleted
KRAS CDE Pos	B3GAT1	TTCGAAGAGCTCCAGGCTGT	205.292	106.606	79.5825	0	155.949	39.7912	0.255155		KRAS CDE Pos	OBSCN	GTAGTCCTTGAACTTGTCTG	349.256	680.139	0.706104	129.285	514.698	64.9957	0.126279	depleted
KRAS CDE Neutral	NAGPA	GGTCCCGTTGAGCACAAAGG	481.008	304.803	166.478	32.8446	392.906	99.6613	0.253652		KRAS CDE Neutral	SLC9B1	TACATTTCTTGTCCTCTAAG	134.989	114.497	0	30.823	124.743	15.4115	0.123546	depleted
KRAS CDE Pos	EN1	GCGAACTGTGGCCCACCCGA	250.47	270.269	71.8393	60.1118	260.369	65.9756	0.253392		KRAS CDE Pos	PRMT8	CCAGTCATCACCATATTTAA	336.4	547.596	2.11831	107.024	441.998	54.5713	0.123465	depleted
KRAS CDE Pos	NKTR	GGAGTGATACCAATGAAAAA	96.3345	105.855	51.1909	0	101.095	25.5954	0.253182		KRAS CDE Neutral	DHX57	CTTATTGCGTAAGCACCAGG	34.2828	139.388	0	21.4049	86.8355	10.7024	0.12325	depleted
NTC	NTC	GCGCGTACATATAAATAGGT	118.259	92.3418	42.1572	11.1548	105.3	26.656	0.253142		KRAS CDE Neutral	PER1	GCTCTCAGTGGTCTCCAGCA	334.258	97.6961	0	53.0841	215.977	26.542	0.122893	depleted
KRAS CDE Neg	TTC26	ATACATCCCAAGAAAGAAGT	65.1088	79.5791	0.430176	35.9431	72.344	18.1867	0.251391		KRAS CDE Pos	CREM	GCAGCCATCACCACTCCCTG	47.1389	133.788	4.23662	17.9801	90.4633	11.1084	0.122794	depleted
KRAS CDE Pos	INPP5F	ATACCAATGATGTCTTCGTG	332.852	337.836	36.1348	131.998	335.344	84.0664	0.250687		NTC	NTC	TCCTGCGCGATGACCGTCGG	827.073	128.187	0	115.586	477.63	57.7931	0.121	depleted
KRAS CDE Neutral	FGR	GCGGCTACTACATCACCACA	373.379	237.236	80.0127	72.506	305.308	76.2593	0.249779		KRAS CDE Neg	ITGAM	ATGACATCCTCATATCCCAA	92.1351	0	0	11.1305	46.0675	5.56526	0.120807	depleted
KRAS CDE Pos	ALDH1L2	GATCTGTTTGCCAATAGGAG	327.537	476.724	11.1846	189.011	402.131	100.098	0.248919		KRAS CDE Pos	PDZD8	GCAATTGCAGATCTTCAGCG	274.263	404.474	1.41221	80.4823	339.368	40.9472	0.120657	depleted
KRAS CDE Neg	GRK7	ACAGCAAAGAGCTGCAGCGG	141.512	171.921	46.8891	30.9855	156.716	38.9373	0.248457		KRAS CDE Neg	BMPR1A	GGCCAATTGTGTCTAATCGG	475.674	418.787	64.2555	43.6659	447.23	53.9607	0.120655	depleted
KRAS CDE Pos	SLC39A9	TTGGGTGCTGGCCTTCTCTG	141.512	168.918	69.6884	7.43651	155.215	38.5625	0.248446		KRAS CDE Neg	SLCO4C1	GGTGTGTTAATCACAGACAA	68.5656	208.46	0	33.3916	138.513	16.6958	0.120536	depleted
KRAS CDE Neg	AMFR	GGACCTCAGTCCTCGCCTGG	75.0745	131.381	2.15088	48.957	103.228	25.554	0.24755		KRAS CDE Neutral	NUDT5	AATCAGTGAAACGTACAACC	79.279	128.187	0	24.8296	103.733	12.4148	0.11968	depleted
KRAS CDE Neutral	AARD	CCAGGGACTCCCAGGTAGAG	322.887	280.028	105.823	43.3796	301.458	74.6014	0.247469		KRAS CDE Neutral	TIPARP	CAACTCTCGGGGTCTGAAAG	152.13	197.259	0.706104	41.0973	174.695	20.9017	0.119647	depleted
KRAS CDE Neg	POFUT1	GGGAGGCCTTACCCATGCAG	93.0126	250.749	0	84.9002	171.881	42.4501	0.246974		KRAS CDE Pos	SERPINH1	GCTGCAGTCCATCAACGAGT	2.14268	148.722	0	17.9801	75.4324	8.99004	0.11918	depleted
KRAS CDE Pos	DEPDC1B	TCCTCCAACAAGGCTGCCAG	234.525	265.764	34.8442	88.6184	250.144	61.7313	0.246783		KRAS CDE Pos	CYP1B1	GTAGCGGCAGCCGAAACACA	441.391	246.418	9.17935	72.7765	343.905	40.9779	0.119155	depleted
KRAS CDE Neg	SEMA5B	AACCCGGAGCCCCGCAACGG	195.327	126.125	0	79.3228	160.726	39.6614	0.246764		KRAS CDE Neutral	LYZ	TTGGGAATGGATGGCTACAG	2.14268	127.565	0	15.4115	64.8538	7.70575	0.118817	depleted
KRAS CDE Neg	XKR4	TGAAATCGTGCACAAACCAG	475.029	403.151	86.4653	130.139	439.09	108.302	0.246651		KRAS CDE Neutral	NLGN1	GCATTTCTGATATCTGACCA	636.375	338.514	0.706104	113.874	487.444	57.29	0.117531	depleted
KRAS CDE Neg	KBTBD12	GCCAGGACCAGTCTGTGGCA	128.225	115.615	0	60.1118	121.92	30.0559	0.246522		KRAS CDE Neg	CEP250	CTAGGTTAGCAGTTCTCCAA	314.973	355.937	0	78.7699	335.455	39.3849	0.117407	depleted
KRAS CDE Pos	PRPF38A	TGTAAAGTGCCCCCAGCATG	338.167	238.737	106.684	35.3234	288.452	71.0035	0.246153		KRAS CDE Pos	TNFSF18	GACTGCTAAGGAGCCCTGTA	107.134	46.0478	0	17.9801	76.5908	8.99004	0.117378	depleted
KRAS CDE Neg	ITGAM	CTCGAGTACGTGCCACACCA	181.375	178.678	45.1684	43.3796	180.026	44.274	0.245931		KRAS CDE Pos	LAMB1	GCCTCCGCTGACGTTCCCCG	233.552	124.454	0	41.9535	179.003	20.9768	0.117187	depleted
KRAS CDE Neg	MMAB	CTTCCACGCCCTGAGGGCCG	89.0264	79.5791	0.430176	40.9008	84.3027	20.6655	0.245134		KRAS CDE Neutral	KCTD1	CTACACTTTGTTATATGAAG	81.4217	72.8054	0	17.9801	77.1135	8.99004	0.116582	depleted
KRAS CDE Pos	EZH2	CTGCTGCTCTCACCGCTGAG	322.887	402.4	153.573	24.1687	362.643	88.8707	0.245064		KRAS CDE Neg	NCR2	CAGGTCGCGGGGAGTCCAGG	428.535	296.2	67.786	16.2677	362.367	42.0268	0.115978	depleted
KRAS CDE Pos	MAGOHB	TTATGTGCACAAGAGTGTAA	421.214	545.793	126.902	108.449	483.503	117.675	0.243381		KRAS CDE Pos	EREG	AAGTGTAGCTCTGACATGAA	398.538	474.791	0.706104	100.175	436.664	50.4404	0.115513	depleted
KRAS CDE Neutral	NUDT5	ACAGTTCCGACCACCAATGG	301.627	150.149	43.0176	66.9286	225.888	54.9731	0.243364		KRAS CDE Neg	ZNF322	CAGATCTTACTTCACACCAG	248.55	531.417	1.41221	88.188	389.984	44.8001	0.114877	depleted
KRAS CDE Pos	NPTXR	CCCCTGAGCCTGAAGGACAA	551.432	358.857	72.6997	147.491	455.144	110.095	0.241891		KRAS CDE Neutral	TSPAN8	CTCTAGCTCCTACGTTGCTG	79.279	128.187	1.41221	22.2611	103.733	11.8366	0.114107	depleted
KRAS CDE Neutral	GOLGB1	GTACAGGTAGTAGTGAACAC	428.522	187.687	3.01123	145.632	308.105	74.3214	0.241222		KRAS CDE Pos	CYP1B1	GCGCCAGGCGAGCGAACGAG	42.8535	143.744	0.706104	20.5487	93.2987	10.6274	0.113907	depleted
KRAS CDE Neg	WASF3	TATGGTGTCAGGATGTTCAG	488.316	608.104	121.74	142.533	548.21	132.136	0.241032		KRAS CDE Pos	MRGPRX4	ACAAAACTGACACCAATCAA	179.985	369.005	0	62.5022	274.495	31.2511	0.113849	depleted
KRAS CDE Neutral	IPO8	GTGATAGGTCCAGGGTTGTG	229.874	275.524	104.533	16.7321	252.699	60.6324	0.239939		KRAS CDE Neutral	ADRB1	AGAAGGAGCCGTACTCCCAG	458.533	644.048	112.271	12.8429	551.29	62.5567	0.113473	depleted
KRAS CDE Pos	PIGR	GCACCAGTATTTCTCGTACG	157.457	286.034	30.1123	76.2242	221.746	53.1683	0.239771		KRAS CDE Neg	SEMA5B	AACCCGGAGCCCCGCAACGG	19.2841	200.37	0	24.8296	109.827	12.4148	0.11304	depleted
NTC	NTC	ATTATTCCTCCGGATGACGA	239.84	252.251	57.2134	60.7315	246.045	58.9724	0.239681		KRAS CDE Neutral	DHH	TTGTGCCCGGCGTGCCAGAG	55.7096	171.746	0	25.6858	113.728	12.8429	0.112927	depleted
KRAS CDE Pos	TSC22D4	ACTCCTGGAGGGAATTCGAG	415.235	449.697	189.707	17.3519	432.466	103.53	0.239394		KRAS CDE Neutral	APEH	ACACTTTGATGCAAGCCATG	102.848	192.903	0	33.3916	147.876	16.6958	0.112904	depleted
KRAS CDE Neutral	SENP8	GCAGTCATGAAACTGACTGT	129.553	181.681	73.1299	1.23942	155.617	37.1846	0.23895		KRAS CDE Neg	BICD1	AAGCCTTGAGAAGACCACCA	520.67	422.52	2.82442	103.6	471.595	53.212	0.112834	depleted
KRAS CDE Neg	ZFP3	GATGGTGGCCATTCTCCAGG	412.577	668.164	158.735	99.1535	540.371	128.944	0.238622		KRAS CDE Neg	HIST1H3E	CCTGGTGCGAGAAATAGCTC	47.1389	28.6243	4.23662	4.28097	37.8816	4.2588	0.112424	depleted
KRAS CDE Neutral	APEH	ATACCTGGTGTTCCATGACG	198.648	221.47	38.7158	61.3512	210.059	50.0335	0.238188		KRAS CDE Neg	TTC26	GAGACTGAAGGACTCGCCGG	98.5631	53.5151	0.706104	16.2677	76.0391	8.4869	0.111612	depleted
KRAS CDE Neutral	LYZ	TGTTTGGCCAAATGGGAGAG	156.793	179.428	61.9453	17.9716	168.111	39.9584	0.237691		KRAS CDE Neg	WDR93	GAAATCCCAAATGAAATGTG	233.552	164.279	0.706104	43.6659	198.915	22.186	0.111535	depleted
KRAS CDE Pos	FEM1B	CAACACCTGCCTAATGATTG	220.573	410.658	30.1123	119.604	315.615	74.8581	0.237181		KRAS CDE Neutral	MYH6	GGATGAGGAGGAGATGAACG	89.9924	84.6285	1.41221	17.9801	87.3104	9.69615	0.111054	depleted
NTC	NTC	CACCTCGCGTCATATCACTA	468.385	576.573	138.086	109.689	522.479	123.887	0.237115		KRAS CDE Neg	OR2L13	GATAGACAGCAAATAGGACT	201.412	366.516	1.41221	61.646	283.964	31.5291	0.111032	depleted
KRAS CDE Neutral	CLEC3A	TCTTGTGAACTTTAGTGCCT	257.113	338.587	118.298	22.9292	297.85	70.6138	0.237078		KRAS CDE Pos	CCDC7	AAAATGGATTCTCCTGTTGG	38.5682	0	0	4.28097	19.2841	2.14049	0.110998	depleted
KRAS CDE Neutral	ZNF141	AATTCTGCTGGTCAGGGTCC	277.045	162.912	73.56	30.3658	219.978	51.9629	0.236218		KRAS CDE Pos	HLA-DQB1	TTGCTACCCGAAGGTCTCCG	147.845	115.12	0	29.1106	131.482	14.5553	0.110702	depleted
KRAS CDE Neutral	PPP3CA	ATCTGCTCAGATGATGAACT	286.346	334.082	51.6211	94.8155	310.214	73.2183	0.236025		KRAS CDE Neutral	ADSL	GGCCATGATGATGTTCTCTG	192.841	109.519	0	33.3916	151.18	16.6958	0.110436	depleted
KRAS CDE Neutral	NCALD	GCCTTGAGTGTAACTTCGAG	194.662	214.713	45.1684	51.4359	204.688	48.3022	0.23598		KRAS CDE Pos	GRB2	AATTGAACTTCACCACCCAG	482.102	551.33	100.267	13.6991	516.716	56.9829	0.110279	depleted
KRAS CDE Pos	KIF17	GCTCGGTGACGTGGTCCACG	130.882	122.372	41.727	17.9716	126.627	29.8493	0.235726		KRAS CDE Neg	LIG4	ACGAGTCCAAATAAACGGTG	162.843	142.499	0	33.3916	152.671	16.6958	0.109358	depleted
NTC	NTC	CATATGCTCGACGGTATAAA	783.299	666.663	231.865	109.689	724.981	170.777	0.23556		KRAS CDE Neg	SLC1A3	TGATGTGCCTGTAGAAACCG	87.8497	84.6285	0	18.8363	86.2391	9.41814	0.10921	depleted
KRAS CDE Neutral	DUOXA2	TGTAACGCGCGCTGCGCTGA	240.504	50.3	46.0288	22.3095	145.402	34.1692	0.234998		NTC	NTC	TTCGACGTGCGGCGTATTGG	201.412	133.788	1.41221	35.104	167.6	18.2581	0.108939	depleted
KRAS CDE Neutral	GOLGB1	GTGCCACAGGAGCCAATGAT	265.086	426.424	83.0239	79.3228	345.755	81.1733	0.234771		KRAS CDE Neutral	MAFG	CAAGGCCTTGTTTCCTTTAT	711.369	551.33	103.091	34.2478	631.349	68.6695	0.108766	depleted
KRAS CDE Neutral	PCDHA6	ATTTGAGCCAACATCTGCAT	170.745	126.125	69.6884	0	148.435	34.8442	0.234744		NTC	NTC	TGGCCCACAAGGTGCGATAT	1322.03	143.744	0	159.252	732.888	79.6261	0.108647	depleted
KRAS CDE Neg	MMAB	GAACTTGGCCACGTTCGCAT	226.552	228.978	0	105.97	227.765	52.9851	0.232631		KRAS CDE Neg	LIG4	TGGTTAATAATAAAAAGCTA	291.404	292.466	7.76714	55.6526	291.935	31.7099	0.10862	depleted
KRAS CDE Neutral	NOSTRIN	CTTTGCATCAGAGAAGGAGG	261.764	148.648	71.8393	23.549	205.206	47.6941	0.232421		NTC	NTC	ACCGGACTGCGATATGCCGT	192.841	210.327	3.53052	40.2411	201.584	21.8858	0.108569	depleted
KRAS CDE Neg	POP1	ATTTATCGAGGTGTGAGAGT	235.189	162.912	0	92.3367	199.051	46.1683	0.231943		KRAS CDE Neutral	ZNF141	TATACAAATTCTGCTGGTCA	460.675	208.46	1.41221	71.0641	334.568	36.2382	0.108313	depleted
KRAS CDE Pos	CYP1B1	CCACATTCCCAAGGACACTG	896.907	758.254	194.439	188.392	827.581	191.415	0.231295		KRAS CDE Pos	CREM	TATAAGAGGGTCTTCGTGAA	173.557	236.462	0.706104	43.6659	205.009	22.186	0.108219	depleted
KRAS CDE Pos	LMO4	GAACTCGTCATGAGGGCGCA	314.914	378.376	10.7544	147.491	346.645	79.1226	0.228252		KRAS CDE Pos	ZIC1	GCGCAGCCTTCAACTCCACG	263.549	91.4734	0.706104	37.6726	177.511	19.1893	0.108102	depleted
KRAS CDE Neg	CLVS1	TCTGATCGATGGGTTCCCCG	226.552	174.173	69.6884	21.6898	200.363	45.6891	0.228032		KRAS CDE Neutral	PFDN6	CCCAGCTTCGGGATCTTGAG	548.525	510.26	3.53052	110.449	529.393	56.9898	0.107651	depleted
KRAS CDE Neg	DNAJC22	ATAGATGCCAACTATCACCT	456.426	406.154	105.823	90.4775	431.29	98.1504	0.227574		KRAS CDE Pos	NKD2	CCTCATAGATGGTGTGCATG	220.696	153.7	0	40.2411	187.198	20.1206	0.107483	depleted
KRAS CDE Pos	GOLGA8O	ATCTGAGAGAACGTTCCATG	545.453	367.866	92.4878	115.266	456.659	103.877	0.227471		KRAS CDE Neutral	CROT	CCTGTACCTGGAAAACCACC	188.556	294.333	15.5343	35.9602	241.444	25.7472	0.106638	depleted
NTC	NTC	CTCGGGCTATTCAGCGATAG	81.0539	107.357	42.1572	0.619709	94.2053	21.3885	0.227041		KRAS CDE Neutral	RTN4RL2	GTTGTTGGAGAAGAGCCACA	128.561	0	0	13.6991	64.2803	6.84956	0.106558	depleted
KRAS CDE Neutral	NOSTRIN	GTGAGCAAGGCATCTTCTGG	269.072	239.488	6.88281	108.449	254.28	57.666	0.226781		KRAS CDE Pos	RTCA	TCTTAGACATGGTGGTACTG	207.84	353.448	0.706104	59.0774	280.644	29.8918	0.106511	depleted
KRAS CDE Neutral	PFKFB2	CTTCTTTCGGCATGACAATG	182.039	150.9	56.7832	18.5913	166.469	37.6872	0.226391		KRAS CDE Neutral	NDUFAF5	ACCTGGGTATGTCATATACA	233.552	199.126	0.706104	45.3783	216.339	23.0422	0.10651	depleted
KRAS CDE Neg	IDH3A	GCAGCAGTAAATTCATAGAT	574.685	412.16	168.629	54.5344	493.422	111.582	0.226138		KRAS CDE Pos	TARBP1	AGTAGCGGCCCGTCCTCGCG	85.7071	19.2903	0	11.1305	52.4987	5.56526	0.106008	depleted
KRAS CDE Pos	ZNF408	GGGGAAGGCTCTTTAAAGCG	637.136	754.5	89.0464	225.574	695.818	157.31	0.22608		KRAS CDE Neg	PREX1	CCAACATCAATGAGACCAAG	107.134	119.476	0	23.9734	113.305	11.9867	0.105792	depleted
KRAS CDE Pos	LOR	GGGAGCGTCAAGTACTCCGG	74.4101	61.5612	13.3354	17.3519	67.9856	15.3437	0.22569		KRAS CDE Neutral	WFDC12	TAACTCCTTCCACAGCCACC	137.131	148.722	2.82442	27.3982	142.927	15.1113	0.105728	depleted
KRAS CDE Neg	OR2L13	TAAGCCTTCAGAACACGCCA	195.991	422.67	81.3032	58.2527	309.331	69.7779	0.225577		KRAS CDE Pos	PEAK1	GGGCTAGTCACTAATTTGGA	83.5644	62.2268	0	15.4115	72.8956	7.70575	0.105709	depleted
KRAS CDE Pos	C6orf223	ACCCCCTCCACCCCAGACAT	499.611	347.596	31.833	159.265	423.603	95.5491	0.225563		KRAS CDE Neutral	PRDM11	TGACGTGCGATGTGTAAACG	132.846	222.772	0.706104	36.8164	177.809	18.7612	0.105513	depleted
KRAS CDE Neutral	UBN1	AGAGGCTCAGAAAAAAAGGG	120.252	61.5612	0	40.9008	90.9066	20.4504	0.224961		NTC	NTC	TAGTCCTAGTTAGATTCGCG	2344.09	146.855	124.98	137.847	1245.47	131.414	0.105513	depleted
KRAS CDE Neg	SNRPG	CCACACATTCATCTATCACA	686.965	574.321	230.574	51.4359	630.643	141.005	0.223589		KRAS CDE Neg	MAP2K1	TGGCGAGATCAGTATCTGCA	310.688	497.192	0.706104	83.9071	403.94	42.3066	0.104735	depleted
KRAS CDE Neg	HIST1H3E	TATGGCGCGTACTAAGCAGA	205.292	281.53	50.3305	57.633	243.411	53.9818	0.221772		KRAS CDE Neg	DHX8	AAGCTGGATGTTGTTTCCTG	141.417	194.77	0	35.104	168.093	17.552	0.104418	depleted
NTC	NTC	AAGCACAAGAACGGTCCGCC	191.34	150.9	0	75.6045	171.12	37.8023	0.220911		KRAS CDE Neg	KAT6A	TTATATGTAGACAATCAGGA	68.5656	129.432	0	20.5487	98.9987	10.2743	0.103782	depleted
KRAS CDE Neutral	GHR	CAATGGGTGTAGCTTTCAGA	382.016	302.551	65.8169	83.041	342.283	74.429	0.217448		KRAS CDE Neg	KAT6A	CATTCGTAGGTGGTGGAGTG	36.4255	62.8491	0	10.2743	49.6373	5.13717	0.103494	depleted
KRAS CDE Neutral	KIF3B	ATACAGCTCATTGCAGCAAG	287.675	77.3269	0	79.3228	182.501	39.6614	0.217322		KRAS CDE Neutral	C3orf38	GGACATCCACCTATTTCAAC	130.703	292.466	0	43.6659	211.585	21.833	0.103188	depleted
KRAS CDE Neg	SPINT1	CTGCCTCGCATCCAACAAGG	418.557	391.139	165.187	10.5351	404.848	87.8612	0.217023		KRAS CDE Pos	TCF3	GCTCAGGTGAGGACTACGGC	179.985	243.307	0	43.6659	211.646	21.833	0.103158	depleted
KRAS CDE Neg	GRK7	CAAGGCGGCAACCTTCCTAG	461.741	487.234	86.8955	118.984	474.488	102.94	0.216949		KRAS CDE Pos	SCRG1	TCCCATCCCAGAAATGATCC	325.687	302.422	1.41221	63.3584	314.055	32.3853	0.10312	depleted
KRAS CDE Pos	EN1	ACGTGTGCAGTACACCCAGG	401.283	279.278	45.1684	101.632	340.28	73.4004	0.215706		KRAS CDE Neg	RIN2	AGTGGGGCCCCAAATTCACA	351.399	428.121	29.6564	50.5155	389.76	40.0859	0.102848	depleted
KRAS CDE Pos	SLC35B4	ATGGATTCCAGGCATTTGTG	282.36	313.061	0	128.28	297.71	64.1399	0.215444		KRAS CDE Neutral	MAFG	AACAGCAGTGAGGATGGTGA	4.28535	70.9386	0	7.70575	37.612	3.85287	0.102437	depleted
KRAS CDE Pos	ALPP	TCCATGGCCAGGGGTATCTC	385.338	304.803	18.4976	130.139	345.07	74.3182	0.215371		KRAS CDE Pos	TMEM65	CTATGAAAGGTATCGCATTG	224.981	366.516	1.41221	59.0774	295.749	30.2448	0.102265	depleted
KRAS CDE Pos	RFX4	GTTAGAATCTCTGCACTGTC	398.626	513.51	95.0688	101.013	456.068	98.0407	0.21497		KRAS CDE Pos	MAP2K2	TCATCAAGAACCCAGCGGAG	141.417	76.539	0	22.2611	108.978	11.1305	0.102136	depleted
KRAS CDE Neutral	CYP1A2	CTTCGACCCTTACAATCAGG	137.526	225.975	67.5376	10.5351	181.75	39.0363	0.21478		KRAS CDE Neutral	LEO1	GATTGCATCTGATTCAGAAG	137.131	115.742	0	25.6858	126.437	12.8429	0.101576	depleted
KRAS CDE Pos	RTCA	CAGCAGATACCAAGACAGCA	105.636	212.461	0	68.168	159.048	34.084	0.214299		KRAS CDE Pos	HOXA4	GGCCGCCTCGCAGCGCCGCG	85.7071	16.8012	3.53052	6.84956	51.2542	5.19004	0.101261	depleted
KRAS CDE Neg	POLR3F	AGGCTCCACCAGTCACAGAC	328.202	265.764	0.860351	126.421	296.983	63.6405	0.21429		KRAS CDE Neg	WDR93	TGAAATACTCATTGCTCCTG	194.984	325.446	0	52.2279	260.215	26.1139	0.100355	depleted
KRAS CDE Pos	MUC17	AAGTGGCAAGAAGAGGACAG	124.903	100.6	0.430176	47.7176	112.751	24.0739	0.213513		KRAS CDE Neutral	ESF1	ATTCAAGAAAAAGAAAAGAA	92.1351	121.342	0	21.4049	106.739	10.7024	0.100268	depleted
KRAS CDE Neutral	EFTUD2	AAAGCTTTGATGGTGTACAG	425.201	619.366	216.809	6.19709	522.283	111.503	0.213491		NTC	NTC	TGCAACGATGGTTACGGTAC	852.785	275.043	1.41221	111.305	563.914	56.3587	0.0999421	depleted
KRAS CDE Neg	ACRBP	GCCGACACAAGAACACAAGC	105.636	48.7985	6.88281	26.0278	77.2171	16.4553	0.213104		KRAS CDE Pos	MFSD5	GTTCTCCCCCCAGTTTCGAA	246.408	365.271	2.82442	58.2212	305.84	30.5228	0.0998001	depleted
KRAS CDE Neg	ARHGEF11	TCACGCTCAGAGATTCGCCT	357.434	338.587	101.521	46.4782	348.01	73.9998	0.212637		KRAS CDE Neg	XYLT1	GTGTGACATCTCAGGCAAGG	235.694	142.499	0	37.6726	189.097	18.8363	0.0996118	depleted
KRAS CDE Pos	NAT16	ACAGCACCCGGGGGTCAAGG	74.4101	123.873	0	42.1402	99.1416	21.0701	0.212525		KRAS CDE Neg	ALOXE3	AGTGGGAATCGGTACCTGCC	94.2778	111.386	0.706104	19.6925	102.832	10.1993	0.0991841	depleted
KRAS CDE Neutral	LARP1B	CTTCTTTCTTCGGGGAAAGA	160.115	257.506	80.0127	8.67593	208.81	44.3443	0.212366		KRAS CDE Neg	KBTBD12	ACTACTTGAATGTAATCAAA	282.833	88.3621	0	36.8164	185.598	18.4082	0.0991832	depleted
KRAS CDE Neg	ZMYND15	GTTAAATCCTGCAGACAGAG	506.919	380.628	110.125	77.4637	443.774	93.7943	0.211356		KRAS CDE Neg	CDV3	CAAAAAGAGGTTGATTACAG	119.99	35.4693	0	15.4115	77.7296	7.70575	0.0991354	depleted
KRAS CDE Pos	FOXG1	TACTACCGCGAGAACAAGCA	296.312	407.655	148.411	0	351.983	74.2053	0.21082		KRAS CDE Neg	IGFL2	AAAATCGTTTGTGAGGCCAA	117.847	247.04	0.706104	35.104	182.444	17.905	0.09814	depleted
KRAS CDE Neg	BZW1	AACACTCTTTGACATTCTGG	185.361	355.103	72.6997	40.9008	270.232	56.8002	0.210191		KRAS CDE Neg	CYP8B1	GAGGTTCTTTGCACTCAGTG	42.8535	228.372	0	26.542	135.613	13.271	0.0978595	depleted
KRAS CDE Pos	HLA-DQB1	TCGGCATCAGGCCGCCCCTG	195.327	278.527	64.0962	35.3234	236.927	49.7098	0.209811		KRAS CDE Neutral	ST3GAL6	AAACTTATCGCTACCATACA	402.823	236.462	28.2442	34.2478	319.643	31.246	0.0977528	depleted
KRAS CDE Neutral	KIF3B	TGGACCCTCATAGTCTCTGG	229.874	222.221	63.666	30.9855	226.047	47.3257	0.209362		KRAS CDE Neg	HSD17B4	TTCAGATGAAGATTTCATGG	327.83	417.542	1.41221	70.2079	372.686	35.8101	0.0960865	depleted
KRAS CDE Pos	TRAF3IP1	TTAATAGTCAGCAAGCTCAG	561.398	310.058	174.651	7.43651	435.728	91.0439	0.208947		KRAS CDE Neg	ITPR2	AGTATGAAGATGGAATTGAA	83.5644	85.873	0	16.2677	84.7187	8.13385	0.0960101	depleted
KRAS CDE Pos	MARVELD3	AAATGCAAATACTTGTGCAC	209.278	207.206	0	86.7593	208.242	43.3796	0.208313		NTC	NTC	AGAAAGGCACGTGCGACGTC	441.391	23.0239	0	44.5221	232.208	22.2611	0.095867	depleted
KRAS CDE Neutral	SOS2	AATATTCTGAAGACCGAAGA	398.626	342.34	100.661	53.295	370.483	76.978	0.207778		KRAS CDE Pos	HLA-DQB1	AGGTGACAGTTGCTACCCGA	70.7083	63.4714	0	12.8429	67.0898	6.42146	0.0957143	depleted
KRAS CDE Neg	NACC1	CTTCTACCAACGATCCCCGT	273.058	345.343	91.6274	35.9431	309.201	63.7853	0.206291		KRAS CDE Pos	PDZD8	GCACGTCATCATTGAAACTG	314.973	259.486	0.706104	53.9402	287.23	27.3232	0.0951266	depleted
KRAS CDE Neutral	SOHLH2	GGAGCCTTCCGTGATGGTGT	141.512	243.242	0	79.3228	192.377	39.6614	0.206165		KRAS CDE Neutral	DHODH	CGTGTACAGCTGCACCAGGG	0	7.46722	0.706104	0	3.73361	0.353052	0.0945605	depleted
KRAS CDE Neutral	FGF9	CTACCTCGGGATGAATGAGA	272.394	402.4	87.3256	51.4359	337.397	69.3808	0.205635		KRAS CDE Neg	NR1H2	CAGTCACCTGTGGGGCCGCA	104.991	140.633	4.23662	18.8363	122.812	11.5365	0.0939359	depleted
KRAS CDE Neutral	BCAP29	GCAAAAGAACTGTCAAACAA	422.543	367.115	69.2583	92.9564	394.829	81.1073	0.205424		NTC	NTC	AACCGTACTGCGAGGAGCAT	137.131	100.185	0	22.2611	118.658	11.1305	0.0938032	depleted
KRAS CDE Neutral	MPC2	ATTCAGGGTCCATTACCTGC	59.7938	81.0806	0.430176	28.5066	70.4372	14.4684	0.205408		KRAS CDE Neg	NACA2	GTGCTTGCTGAGATAAATCT	434.963	569.375	0.706104	93.3252	502.169	47.0156	0.0936251	depleted
KRAS CDE Neutral	C14orf93	GTTTCCCCATGCAGGACCAG	159.45	251.5	0	84.2805	205.475	42.1402	0.205087		KRAS CDE Neutral	C14orf159	CTCTGAGATAGCACCTTGAG	432.821	273.176	0.706104	65.0708	352.998	32.8884	0.0931689	depleted
KRAS CDE Neg	LZTFL1	TCTGATACCTGCTCTCCTTG	341.489	307.806	132.494	0.619709	324.648	66.5569	0.205013		KRAS CDE Pos	GPR158	CTTGGCGCAGAAACTCGCCG	257.121	379.584	0	59.0774	318.352	29.5387	0.0927862	depleted
KRAS CDE Pos	SLC39A4	TGTTGAAAGTACGGGACCCG	134.204	171.921	0	62.5906	153.062	31.2953	0.204461		KRAS CDE Neg	ITPR2	GCATCCACCCGAGCAAGCAA	179.985	51.026	0	21.4049	115.505	10.7024	0.0926574	depleted
KRAS CDE Neutral	UBTD2	TCGTAACCAGCCTTTGAAAA	286.346	200.449	99.3706	0	243.398	49.6853	0.204132		KRAS CDE Neutral	EMILIN3	CGTGTAGAGACTGTAGCGGG	19.2841	52.8928	4.94273	1.71239	36.0884	3.32756	0.0922056	depleted
KRAS CDE Pos	SYNJ1	GGCGGGGGCAAAGAAGACTG	103.643	140.39	19.3579	30.3658	122.016	24.8618	0.203759		KRAS CDE Neg	NACA2	GGTAAAACCTGCATCATTGA	169.271	230.239	0.706104	35.9602	199.755	18.3331	0.0917779	depleted
KRAS CDE Neutral	SDHD	ATCTTGGCTCGGCACGATCT	456.426	485.733	126.902	65.0695	471.08	95.9856	0.203757		KRAS CDE Neg	GOLGA6B	ATCGGATACAGGAGCTGGAG	8.57071	128.187	1.41221	11.1305	68.379	6.27137	0.0917148	depleted
KRAS CDE Neg	FABP4	GATTTCCTTCATACTGGGCC	429.851	216.966	41.2969	90.4775	323.408	65.8872	0.203728		KRAS CDE Neutral	C2orf71	AGAGCCCGAAGAATGGAAGT	83.5644	140.633	0	20.5487	112.099	10.2743	0.0916545	depleted
NTC	NTC	TCGTGCCTAGCTCGGTTGAG	148.82	265.013	39.146	44.6191	206.917	41.8825	0.202412		KRAS CDE Pos	CYP2D6	TGACCTGTTCTCTGCCGGGA	994.202	799.615	0	164.389	896.908	82.1947	0.0916422	depleted
NTC	NTC	ACGTCGGTCTAGAGTTAAGT	201.97	144.143	69.2583	0.619709	173.057	34.939	0.201893		NTC	NTC	GCGTATCTACCCTACCGCCG	484.245	92.0957	1.41221	51.3717	288.17	26.3919	0.0915845	depleted
KRAS CDE Pos	CR1	ACATGAAAACCCTAAAGAAG	497.618	352.851	100.661	70.6469	425.234	85.654	0.201428		KRAS CDE Neg	ARHGEF11	AGATCATGCCCACGTCCCTG	413.537	354.071	68.4921	1.71239	383.804	35.1022	0.0914589	depleted
NTC	NTC	TAGGCGGACGGTTACATATA	418.557	388.136	86.0351	76.2242	403.346	81.1297	0.201141		KRAS CDE Pos	CRYAA	GGCGCTCGTTGTGCTTTCCG	272.12	243.929	0	47.0907	258.025	23.5453	0.0912524	depleted
KRAS CDE Neg	HIST1H3E	AGTCTACCGAGCTTCTAATC	624.513	367.866	100.231	99.1535	496.19	99.6922	0.200916		KRAS CDE Neutral	TATDN1	ATCTTGCTGAAAACAATAAA	317.116	263.219	0.706104	52.2279	290.168	26.467	0.0912127	depleted
KRAS CDE Neutral	BASP1	CTTGGAATAGACACTCCGGC	142.176	117.116	0	52.0556	129.646	26.0278	0.20076		KRAS CDE Neg	TUT7	GGTCCAGACCTAGGAAGCCA	134.989	62.2268	0	17.9801	98.6077	8.99004	0.0911698	depleted
KRAS CDE Neutral	HSF2BP	ACCCAGAATACTAAATGGGG	33.2188	12.0119	4.73193	4.33796	22.6154	4.53495	0.200525		KRAS CDE Neutral	BCAP29	GCTGGTGGAGCTCTTCTCAA	351.399	195.392	0	49.6593	273.396	24.8296	0.0908195	depleted
KRAS CDE Neutral	ZNF730	TCATGTGTCTTCAAATTCCA	246.483	157.657	0.430176	80.5622	202.07	40.4962	0.200407		NTC	NTC	GACCTCGCAATTGAGCGCTC	3246.15	211.571	227.365	85.6194	1728.86	156.492	0.0905176	depleted
KRAS CDE Pos	CDK7	CTTAATGGCGACAATTTGGT	281.695	217.716	75.7109	24.1687	249.706	49.9398	0.199994		KRAS CDE Neg	KRT28	AATACAAGCAGCATTTCCAA	184.27	110.141	0	26.542	147.206	13.271	0.0901528	depleted
KRAS CDE Neg	DUSP11	TCAACGCTATTATAAACCAG	325.544	291.29	118.298	4.95767	308.417	61.628	0.19982		KRAS CDE Pos	RPL13A	GTGGTGGTCGTACGCTGTGA	85.7071	75.9167	0	14.5553	80.8119	7.27765	0.0900567	depleted
KRAS CDE Neutral	SLC1A2	TTAACATAACCACATCAGGG	58.4651	164.413	0.430176	43.9994	111.439	22.2148	0.199344		KRAS CDE Neutral	RFWD3	TACTTGTCCTTTAAGCCACG	231.409	403.852	1.41221	55.6526	317.631	28.5324	0.089829	depleted
KRAS CDE Neg	NACC1	TGGAGTGCCTCAATGAACAG	342.154	185.434	24.9502	79.9425	263.794	52.4463	0.198816		KRAS CDE Neg	ITPR2	AACCAGGGCCTCAGGAATGG	122.133	105.163	0.706104	19.6925	113.648	10.1993	0.0897446	depleted
KRAS CDE Pos	SIAE	CCCTTGTTTAGGGACCCCAC	184.032	117.116	0	59.4921	150.574	29.746	0.197551		KRAS CDE Neg	KAT6A	ACAGCTCAAGAAAAGCCCTG	74.9937	39.8252	0	10.2743	57.4094	5.13717	0.089483	depleted
KRAS CDE Pos	SLC24A2	GACTCGCCTTCCTTAGAAAG	57.8007	142.642	39.5762	0	100.221	19.7881	0.197444		KRAS CDE Neg	XKR4	CAGCACCGAGGACAGCGCCA	282.833	223.394	0.706104	44.5221	253.114	22.6141	0.0893436	depleted
KRAS CDE Neutral	ACTRT3	GAGCCGTTGTCGATCACCAC	469.049	352.1	95.0688	66.9286	410.575	80.9987	0.197281		KRAS CDE Neg	PELI2	TTTGGAAGAGTCAAATCCGG	224.981	243.307	0.706104	41.0973	234.144	20.9017	0.0892687	depleted
KRAS CDE Neg	SLC16A12	GGAGCCTTACTCATTCTTGG	72.417	191.44	19.7881	32.2249	131.929	26.0065	0.197125		NTC	NTC	CAGCCACCGCACCGGCGTAA	1416.31	247.663	0	148.122	831.986	74.0608	0.0890169	depleted
KRAS CDE Neutral	NUDT5	GCACTGCCAGATCTCGGGCC	391.317	274.773	56.7832	74.3651	333.045	65.5741	0.196893		KRAS CDE Neg	BMPR1A	ATCATAGAAGAAGATGACCA	250.693	93.9625	0.706104	29.9668	172.328	15.3365	0.0889958	depleted
KRAS CDE Pos	GOLGA8O	GGGCTGCTTGAAGAAGCGAG	126.896	181.681	0	60.7315	154.288	30.3658	0.196812		KRAS CDE Neg	VDAC1	TAGCACCAGAGCACCCCGGA	68.5656	211.571	0	24.8296	140.068	12.4148	0.088634	depleted
KRAS CDE Neg	CDV3	CCAGAACCAGCGATGACTAG	368.064	210.209	14.626	99.1535	289.137	56.8897	0.196757		KRAS CDE Neutral	KCTD1	ATCATCAGGAATGAGGAGTT	149.987	296.822	39.5418	0	223.405	19.7709	0.0884982	depleted
KRAS CDE Neutral	TAS2R19	TTACAAATCAGAAATACCAA	362.085	217.716	99.8007	14.2533	289.901	57.027	0.196712		KRAS CDE Neg	AP4E1	GTCACTCACAGAACTGCCCT	87.8497	47.9147	0	11.9867	67.8822	5.99336	0.0882906	depleted
NTC	NTC	GGAGTCTCACGCAATTAGCG	238.511	304.803	93.7783	13.0139	271.657	53.3961	0.196557		KRAS CDE Neg	UROC1	CCGCTGGGTGTGCACATCGG	381.396	231.484	4.23662	49.6593	306.44	26.948	0.0879387	depleted
KRAS CDE Neutral	BCAP29	CTAGAAATAGAACAATCAAT	180.71	153.903	0	65.6892	167.307	32.8446	0.196314		KRAS CDE Pos	ALPP	CCCTCCTGGCGGGCGGAGGC	66.423	139.388	0	17.9801	102.906	8.99004	0.0873621	depleted
KRAS CDE Pos	SERPINH1	GTGCATCATCATGACACCCA	188.683	213.963	78.292	0	201.323	39.146	0.194444		KRAS CDE Pos	ATF6	GTGTTAATTAGGGGCTGACA	57.8523	207.215	0	23.1172	132.534	11.5586	0.0872127	depleted
KRAS CDE Pos	TGOLN2	GAAAAAGATCTAAAGTCACC	137.526	111.861	2.58105	45.8585	124.694	24.2198	0.194234		KRAS CDE Neg	RCBTB2	CATCAGCCTTTCTCCTGAGG	276.405	272.553	1.41221	46.2345	274.479	23.8234	0.0867947	depleted
KRAS CDE Neutral	RPSA	GCAATGTCCACATAGCGCAG	128.225	96.0955	0	43.3796	112.16	21.6898	0.193383		KRAS CDE Neg	ARHGEF11	CTTGGGGGAGAGTCATCTGG	747.794	622.891	1.41221	117.299	685.342	59.3554	0.086607	depleted
KRAS CDE Neutral	ATP5L2	GACTTACTTGAAGCCTCGAT	145.498	129.128	0	52.6753	137.313	26.3376	0.191807		KRAS CDE Neg	ITPR2	GTTCATGAAGATGTGCCGCA	197.126	149.967	0	29.9668	173.546	14.9834	0.0863366	depleted
KRAS CDE Neutral	CXCR5	AATGGACCTCGAGAACCTGG	267.079	337.085	1.29053	113.407	302.082	57.3487	0.189845		KRAS CDE Pos	CYP1B1	CCACATTCCCAAGGACACTG	539.954	764.768	0.706104	111.305	652.361	56.0057	0.0858508	depleted
KRAS CDE Pos	CDHR2	TTTCTCCACCAGCATCAACG	119.588	94.594	40.4365	0	107.091	20.2183	0.188795		NTC	NTC	CACCTCGCGTCATATCACTA	2286.24	820.15	4.94273	260.283	1553.19	132.613	0.0853809	depleted
NTC	NTC	GCTTTCACGGAGGTTCGACG	206.621	337.836	101.521	1.23942	272.228	51.3804	0.18874		KRAS CDE Neg	CINP	AAGCTGTCTTCAACTACCAA	199.269	268.82	1.41221	38.5287	234.044	19.9705	0.0853277	depleted
KRAS CDE Pos	SERPINH1	GCTGCAGTCCATCAACGAGT	71.0882	126.125	0	37.1826	98.6068	18.5913	0.18854		KRAS CDE Neg	ITPR2	TAACAATGAAATAAAAAAGA	23.5694	116.986	0	11.9867	70.2779	5.99336	0.0852808	depleted
KRAS CDE Neutral	NUDT5	GTGCTCCTGGCAGATAATTG	419.886	417.415	0.430176	157.406	418.65	78.9182	0.188506		KRAS CDE Neg	PAX1	CACATCCGGGACTACAAGCA	107.134	322.957	0.706104	35.9602	215.046	18.3331	0.0852523	depleted
KRAS CDE Neg	LZTFL1	CAAGATTTACAGCTTGATCA	121.581	139.639	48.1797	0.619709	130.61	24.3997	0.186814		KRAS CDE Neutral	SLC6A6	AGCACCAGGAGCATGGCGAA	329.972	273.798	0	51.3717	301.885	25.6858	0.0850848	depleted
NTC	NTC	ACGGAACCCGATCGGAACGG	61.1226	131.381	0	35.9431	96.2516	17.9716	0.186715		KRAS CDE Pos	HAND1	TCGACTGGGCCCAGGGCAGG	381.396	304.911	0	58.2212	343.154	29.1106	0.0848325	depleted
KRAS CDE Pos	SLC35B4	GAAGCCAAGAAGACGAAACC	36.5407	60.0597	0	17.9716	48.3002	8.98578	0.18604		NTC	NTC	GATATTTACCGGCGATAAGA	212.125	72.8054	0	23.9734	142.465	11.9867	0.0841379	depleted
KRAS CDE Neg	ACRBP	TTGCTGAGCCTCTCAGGCCA	276.38	300.298	0	107.21	288.339	53.6048	0.185909		KRAS CDE Neg	NCOA6	GGCAAGACCATCCTTAGCCA	36.4255	136.899	0	14.5553	86.6623	7.27765	0.0839772	depleted
KRAS CDE Pos	TRAF3IP1	ACAGGGTCTGGATGGACGTG	111.615	160.66	0.860351	49.5767	136.137	25.2185	0.185243		KRAS CDE Pos	DEPDC1B	CTTAGCACGAAAAAGCTCCA	402.823	148.722	0	46.2345	275.773	23.1172	0.0838272	depleted
KRAS CDE Pos	NAGK	AGACTCACCAAGCTTCGCAG	265.086	240.239	0	92.9564	252.662	46.4782	0.183954		KRAS CDE Neutral	ZNF775	TACAAAGTGACCCTCGCCGG	134.989	151.211	0	23.9734	143.1	11.9867	0.0837647	depleted
KRAS CDE Pos	MUC17	GCTTCCTTCAGTATAAGTTG	562.726	340.088	0	165.462	451.407	82.7312	0.183274		KRAS CDE Neg	GRK7	ACAGCAAAGAGCTGCAGCGG	117.847	25.513	0	11.9867	71.6801	5.99336	0.0836126	depleted
KRAS CDE Neutral	ZNF141	CTCTCACCTACCTGGGGGTC	59.1295	185.434	0	44.6191	122.282	22.3095	0.182443		KRAS CDE Neg	WDR93	GCTCCTCATCTGGATCCACG	657.802	836.951	0.706104	123.292	747.376	61.9991	0.0829556	depleted
NTC	NTC	CTCGTATAGTATTGCGTGGT	250.47	64.5642	57.2134	0	157.517	28.6067	0.18161		KRAS CDE Pos	OR52E8	TGGTGGCTGTAGACAAGCCC	83.5644	133.788	0	17.9801	108.676	8.99004	0.0827233	depleted
KRAS CDE Pos	ATAD3A	GGTGCTCGGCCGCCTTCAGG	32.5544	63.0627	0	17.3519	47.8086	8.67593	0.181472		KRAS CDE Neutral	TSPAN31	CTTCCTTCTCCTTATTGCAG	197.126	237.706	0	35.9602	217.416	17.9801	0.0826989	depleted
KRAS CDE Pos	DDX60	GTTCCTTGATGATCTCCCTG	389.989	281.53	38.7158	82.4213	335.759	60.5686	0.180393		KRAS CDE Neutral	PTMS	CATGTCGGAGAAAAGCGTGG	104.991	48.5369	0.706104	11.9867	76.764	6.34641	0.0826743	depleted
KRAS CDE Neg	POLR1E	TTGACCTGACAGTGTTACAG	124.238	153.903	0.430176	49.5767	139.071	25.0035	0.17979		KRAS CDE Neutral	FAM105A	GTTGGCAGTTTCATTTCTGG	512.1	711.253	0	101.031	611.676	50.5155	0.0825853	depleted
KRAS CDE Pos	OCEL1	GCAGGACCCGCCCATCAGCC	140.848	277.025	74.4204	0.619709	208.937	37.52	0.179576		KRAS CDE Neg	OR2T5	TGAAATCCAACTTTCCAGTG	139.274	440.566	1.41221	46.2345	289.92	23.8234	0.0821722	depleted
KRAS CDE Pos	GFI1	CCTCTTGCCACAGTACTGAC	136.861	64.5642	36.1348	0	100.713	18.0674	0.179395		KRAS CDE Neutral	OR3A3	CTCTGCTGAGGGCAGAAAGA	235.694	275.043	0	41.9535	255.368	20.9768	0.0821431	depleted
KRAS CDE Pos	PRTN3	CTGTGGCGACGGAGGCACTG	100.321	148.648	0	44.6191	124.484	22.3095	0.179216		KRAS CDE Neg	CD2BP2	GTTCAGGAAGTAGTTGCCAT	104.991	82.7617	0	15.4115	93.8764	7.70575	0.082084	depleted
KRAS CDE Pos	NR1H3	GAGGCTGCAGCACACATATG	568.041	441.439	16.3467	163.603	504.74	89.975	0.17826		KRAS CDE Neutral	CCDC58	AGAACTGAATGTTGAAGAAG	297.832	451.767	0.706104	60.7898	374.799	30.748	0.0820384	depleted
KRAS CDE Pos	CCDC7	ATTCTGATCGCAATGTCCAT	228.545	212.461	0.430176	78.0834	220.503	39.2568	0.178033		KRAS CDE Pos	DEGS1	CCGACCAGCCGCACGCCGAC	2.14268	29.2466	0	2.56858	15.6946	1.28429	0.0818299	depleted
KRAS CDE Neutral	HSF2BP	TGCTGGAGACACCCCACAAG	101.65	90.8403	0	34.084	96.2449	17.042	0.177069		KRAS CDE Pos	FZD9	ATAGCAAACGATGACGCAGG	209.982	9.95629	0	17.9801	109.969	8.99004	0.0817505	depleted
KRAS CDE Pos	HOXA4	GCTCTGTTTGTCTGAGCGCC	98.3276	27.0269	21.5088	0.619709	62.6772	11.0642	0.176527		KRAS CDE Pos	MRVI1	GCAACGCTGACCCTCCGGCG	276.405	154.323	0	35.104	215.364	17.552	0.0814992	depleted
KRAS CDE Neutral	CDH12	TTATCCATCTGCCAGGACAA	160.779	227.476	59.7944	8.67593	194.128	34.2352	0.176354		KRAS CDE Neutral	TRPV1	GCCATGCTCAACCTGCACGA	486.388	417.542	0.706104	72.7765	451.965	36.7413	0.0812924	depleted
KRAS CDE Neutral	MOK	ACGTGTAGAACCCATCAGTG	176.06	207.957	47.7495	19.8307	192.008	33.7901	0.175983		KRAS CDE Pos	FN1	CATACCACGTAGGAGAACAG	66.423	123.831	4.23662	11.1305	95.1272	7.68358	0.0807716	depleted
KRAS CDE Pos	DUSP2	CTGTCCCGATCTGTGCTCTG	382.681	383.631	88.6162	45.8585	383.156	67.2373	0.175483		KRAS CDE Neg	WASF3	AAGAGCTTAGACCCGACAAC	353.542	250.774	0	48.8031	302.158	24.4015	0.0807576	depleted
KRAS CDE Neutral	RPSA	CACCAATCTTGACTTCCAGA	131.546	102.852	0	40.9008	117.199	20.4504	0.174493		KRAS CDE Neg	DIRAS2	TTTCACAAACCTCAACACCA	77.1364	93.9625	0	13.6991	85.5494	6.84956	0.0800655	depleted
KRAS CDE Neg	CEP250	CTAGGTTAGCAGTTCTCCAA	226.552	221.47	0	78.0834	224.011	39.0417	0.174285		KRAS CDE Pos	GFI1	AGCTTTGACTGTAAGATCTG	40.7109	227.75	0	21.4049	134.231	10.7024	0.0797317	depleted
NTC	NTC	CTTTATTCCGTTGCATGTCG	199.977	299.548	86.8955	0	249.762	43.4477	0.173956		KRAS CDE Pos	ASB4	TGGGAAAACCCCTCTTCACG	154.273	168.012	0	25.6858	161.143	12.8429	0.0796991	depleted
KRAS CDE Pos	TNFSF18	TCAGACACCTTATTCACGCA	356.105	265.764	0	107.829	310.935	53.9147	0.173396		KRAS CDE Pos	GPN3	ATTCACCTGGACAATCAAAA	122.133	147.478	0	21.4049	134.805	10.7024	0.0793919	depleted
KRAS CDE Neg	MMAA	AAAGTTCCTCTAGTAGGAGA	143.505	132.882	0	47.7176	138.194	23.8588	0.172648		KRAS CDE Neutral	DCAKD	TCTTTAACCAGCCTGACCGG	550.668	514.616	2.11831	82.1947	532.642	42.1565	0.079146	depleted
KRAS CDE Neutral	FAM105A	AGGGCACAAGCTGAAATGGT	461.741	459.457	104.963	53.9147	460.599	79.4388	0.172468		KRAS CDE Neg	EXOSC8	ACAGCAAAGGAAGTTGCAAC	149.987	64.7159	0.706104	16.2677	107.352	8.4869	0.079057	depleted
KRAS CDE Neg	PREX1	TGCACTTGGGCAGCAACCCG	111.615	170.419	0.860351	47.7176	141.017	24.289	0.172241		KRAS CDE Neutral	SLC6A6	TCCTGACATCACCCGCCTTG	1356.31	1250.14	4.23662	201.206	1303.23	102.721	0.0788207	depleted
KRAS CDE Neutral	GYS2	CAATCCGTCTAATGGTGCTG	203.963	119.369	0.430176	55.1541	161.666	27.7921	0.171911		KRAS CDE Neg	CDV3	GATAACTGGGAAGAAGGTGG	197.126	148.722	0.706104	26.542	172.924	13.6241	0.0787864	depleted
KRAS CDE Neutral	RABL2A	AGATGGCAAGACCATCCTTG	274.387	358.857	46.8891	61.9709	316.622	54.43	0.171909		NTC	NTC	TTATGTGCCTCTCGGCGCAT	2412.65	192.281	0	204.63	1302.47	102.315	0.0785549	depleted
KRAS CDE Neutral	OR3A3	TCTTTCTGCCCTCAGCAGAG	64.4445	68.3179	10.3242	12.3942	66.3812	11.3592	0.171121		KRAS CDE Pos	KIF17	CAGAACTCGGATGAGGACAG	302.117	145.611	7.76714	27.3982	223.864	17.5827	0.0785418	depleted
KRAS CDE Neg	MRPL45	TCACCGTACGCATGCACACC	358.099	347.596	36.9951	83.6607	352.847	60.3279	0.170975		KRAS CDE Pos	NKD2	AGAGAGGGCAGCAAACCGCG	606.377	235.217	0	65.927	420.797	32.9635	0.0783358	depleted
KRAS CDE Pos	SNRPF	TGGAGCTTTGTCTGGACATC	427.194	366.364	23.2295	112.167	396.779	67.6984	0.17062		KRAS CDE Neg	C3orf56	AGATACGGACTTCCTATGAG	102.848	72.1831	0	13.6991	87.5158	6.84956	0.0782665	depleted
KRAS CDE Neutral	IQSEC3	CTGCATGTGCAACCCCGAAG	368.729	308.557	74.4204	40.2811	338.643	57.3507	0.169355		KRAS CDE Pos	GRPEL2	GCCCGCCCACAGCGACCGTA	109.277	295.577	0	31.6792	202.427	15.8396	0.0782485	depleted
KRAS CDE Pos	EMB	TTCGAGAGGAAAAGGAACAA	31.89	90.0895	19.3579	1.23942	60.9898	10.2987	0.168859		NTC	NTC	CTCGGGCTATTCAGCGATAG	1534.16	55.3819	0	124.148	794.769	62.0741	0.0781033	depleted
KRAS CDE Neg	VAPA	TGTAGTGACTACATCTGTGA	263.093	280.028	42.5874	48.957	271.561	45.7722	0.168552		KRAS CDE Pos	CCDC7	ATTTGCCGATTTGTTACTGG	634.232	520.216	0	89.9004	577.224	44.9502	0.077873	depleted
KRAS CDE Neg	PKIG	TGACATCCAGGGAGACTCAG	504.261	517.264	121.74	50.1964	510.763	85.9681	0.168313		KRAS CDE Neutral	TRPV1	CCTGCGATCATAGAGCCTGA	304.26	171.746	0	36.8164	238.003	18.4082	0.0773443	depleted
KRAS CDE Neutral	SAR1B	TTATTCCCAAGAATCAGTAT	259.771	138.137	19.7881	47.0979	198.954	33.443	0.168094		KRAS CDE Neg	KBTBD12	TGGCTGTGTAGGTCAAGACA	430.678	474.168	1.41221	68.4956	452.423	34.9539	0.0772593	depleted
KRAS CDE Neg	SLC7A6	AATCAGTGACATCCCATAGG	106.965	119.369	0.860351	37.1826	113.167	19.0215	0.168084		KRAS CDE Neg	EXOC5	CAGCTTGCTGGAAAGATTGG	167.129	263.219	0.706104	32.5354	215.174	16.6207	0.0772432	depleted
KRAS CDE Pos	ZBTB4	GGAGCCGCTGTTCATTGAGC	54.4788	82.5821	0	22.9292	68.5305	11.4646	0.167292		KRAS CDE Neg	STARD6	AAGTGTATAATATGGTACAC	209.982	550.085	34.5991	23.9734	380.034	29.2863	0.0770623	depleted
KRAS CDE Neutral	PCARE	ATAGGTGTAAGCCTGCTGGT	204.628	236.485	36.5649	37.1826	220.556	36.8737	0.167185		KRAS CDE Neg	TLN2	CCTCTTTCCTTACCTCCAGT	265.692	321.09	1.41221	43.6659	293.391	22.5391	0.0768226	depleted
KRAS CDE Neutral	C1orf87	CTGAGAAAAACTGAGAGTCA	253.127	353.601	94.2085	6.8168	303.364	50.5126	0.166508		KRAS CDE Pos	OR2D3	AGACTGCATCTGGATAACAG	327.83	530.795	0	65.927	429.312	32.9635	0.0767821	depleted
KRAS CDE Pos	SCLY	CTGCGGGAAACACAACTCGC	141.512	83.3328	0	37.1826	112.422	18.5913	0.16537		KRAS CDE Pos	SLC35B4	ATTTGGGAAACACTCCAAGG	137.131	72.8054	0.706104	15.4115	104.968	8.0588	0.0767736	depleted
KRAS CDE Neg	TCF7L2	ATAAAGCCAAGAGTGTCAGA	125.567	129.128	0.430176	41.5205	127.348	20.9753	0.164709		KRAS CDE Neg	KRTAP4-2	ACCTGCTGCCGCCCCAGCTG	205.697	363.405	0	43.6659	284.551	21.833	0.0767278	depleted
KRAS CDE Pos	OCEL1	CAGTAAATGCACAACCCGGA	222.566	336.334	7.31299	84.2805	279.45	45.7967	0.163882		KRAS CDE Neg	PANK3	ATGCCAAAAGTTTCATTGAG	109.277	327.313	0	33.3916	218.295	16.6958	0.0764828	depleted
KRAS CDE Pos	TMEM246	AGAGCAACTTGGCATCAAAA	406.598	324.322	1.29053	118.364	365.46	59.8275	0.163705		KRAS CDE Pos	LRRN1	TTAGTAGGCCCAGCACCAAT	494.958	343.492	0.706104	63.3584	419.225	32.0322	0.0764082	depleted
KRAS CDE Neg	POP1	TGCCCCAGCCCTTTGGGAGT	122.91	126.125	0.430176	40.2811	124.517	20.3556	0.163476		KRAS CDE Neg	GIP	CGAGGCCCCAGGTACGCGGA	143.559	137.521	0	21.4049	140.54	10.7024	0.076152	depleted
KRAS CDE Neutral	SDHC	AATAAGACTCAAAGTTCCCA	74.4101	217.716	47.7495	0	146.063	23.8747	0.163455		KRAS CDE Neg	POP1	CGGCCCAACTACGTTAAGCT	336.4	214.06	1.41221	40.2411	275.23	20.8267	0.07567	depleted
NTC	NTC	CCATCGGTTCGACTTACCGC	204.628	158.407	58.5039	0.619709	181.518	29.5618	0.162859		KRAS CDE Pos	B3GAT1	CAGGCCTACTTCAAGCTGCG	64.2803	71.5608	0	10.2743	67.9206	5.13717	0.0756349	depleted
KRAS CDE Pos	NKTR	AGAAAGTACCGGGAAGAAGG	156.128	205.704	0	58.8724	180.916	29.4362	0.162706		KRAS CDE Neg	MAP2K1	TATGGTGCGTTCTACAGCGA	6.42803	113.875	5.64883	3.42478	60.1516	4.5368	0.0754229	depleted
KRAS CDE Pos	TCF12	GTTGGTGAAACTGAGTGTGG	215.258	266.515	0.860351	77.4637	240.886	39.162	0.162575		KRAS CDE Pos	LMO4	CTGCGAGTGAACTCGTCATG	237.837	205.971	0	33.3916	221.904	16.6958	0.0752388	depleted
KRAS CDE Neutral	SLC6A12	GAACAGGTAGAAGAGAGCCC	300.962	180.179	50.3305	27.8869	240.571	39.1087	0.162566		KRAS CDE Neg	LENG8	CCGCACCGAGTTCACGGTGG	177.842	317.357	2.11831	35.104	247.599	18.6111	0.0751663	depleted
NTC	NTC	CAACGATCAGGCGTGTTATC	213.265	185.434	2.15088	62.5906	199.349	32.3708	0.162382		KRAS CDE Pos	TSPO	GGTACGGCTCCTACCTGGTC	100.706	219.661	0	23.9734	160.183	11.9867	0.0748313	depleted
NTC	NTC	CAGCTCACCCTGCGTACGGT	59.7938	47.297	0	17.3519	53.5454	8.67593	0.162029		KRAS CDE Pos	B3GAT1	TTCGAAGAGCTCCAGGCTGT	306.403	243.929	0	41.0973	275.166	20.5487	0.0746774	depleted
KRAS CDE Neutral	C14orf159	CACAGTTATGACTGACCTGA	162.108	165.915	0.430176	52.6753	164.011	26.5527	0.161896		KRAS CDE Neutral	ST3GAL6	TGGCTGTTGGAATTGTTGAT	25.7121	77.7835	0	7.70575	51.7478	3.85287	0.0744548	depleted
KRAS CDE Neg	HSD17B4	TTCAGATGAAGATTTCATGG	315.579	407.655	76.5713	40.2811	361.617	58.4262	0.161569		KRAS CDE Neg	TTC26	TAAATACCTTGTGAGCCAAG	362.112	149.344	22.5953	15.4115	255.728	19.0034	0.0743109	depleted
KRAS CDE Neg	DPPA2	TTAATGGGAGGCAAAATGGT	173.402	130.63	47.7495	1.23942	152.016	24.4945	0.161131		KRAS CDE Pos	COX8A	ATCCATTCGTTGCCGCCGGA	214.268	141.255	0.706104	25.6858	177.761	13.196	0.0742342	depleted
KRAS CDE Pos	GOLGA8O	GGTCTGCCTTCTCCTTCAGG	987.263	776.272	64.5263	218.757	881.767	141.642	0.160634		KRAS CDE Pos	ADPRHL2	TGTGTCATCTGTGTAGTACA	522.813	286.243	0	59.9336	404.528	29.9668	0.0740784	depleted
KRAS CDE Pos	MAP2K2	GTACATCGTGGGCTTCTACG	72.417	155.404	0	36.5628	113.911	18.2814	0.160489		KRAS CDE Pos	ZIC1	GGATTCGTAGCCAGAGCTGG	404.966	449.278	0.706104	62.5022	427.122	31.6041	0.0739933	depleted
KRAS CDE Neutral	POLR1D	GAAAACTAGAGCTGAAACAA	156.128	172.672	0	52.6753	164.4	26.3376	0.160205		KRAS CDE Pos	LAMB1	AGTCACTGCAGATATGGTAA	584.951	757.3	28.2442	71.0641	671.126	49.6541	0.0739864	depleted
KRAS CDE Neg	RNF103	GCCAGTTTCATACCACACAA	445.132	338.587	88.186	37.1826	391.859	62.6843	0.159966		KRAS CDE Neutral	EDN1	CCACTCCCAGTCCACCCTGG	302.117	493.459	1.41221	57.365	397.788	29.3886	0.0738801	depleted
KRAS CDE Pos	AGFG1	ACCACAGGTAAAGCTCCTGT	145.498	222.972	1.7207	57.0132	184.235	29.367	0.1594		KRAS CDE Pos	SLC30A10	GAAGATGGTGAAGCAGAGCG	550.668	407.586	0	70.2079	479.127	35.104	0.0732666	depleted
KRAS CDE Neg	BLK	TGGAAGTTGTCACTTATGGG	211.936	291.29	0	79.9425	251.613	39.9712	0.15886		KRAS CDE Neutral	DUOXA2	TCTGAAAGAGAATTACGCCG	214.268	160.545	0	27.3982	187.406	13.6991	0.0730984	depleted
KRAS CDE Neg	SLC2A13	GCAGCGGGTCCTCTGCCCGG	209.943	180.93	61.9453	0	195.436	30.9726	0.158479		KRAS CDE Pos	UBALD2	TGTTGGGAATGTTGGTTTCT	681.371	326.691	1.41221	71.9203	504.031	36.6663	0.0727461	depleted
KRAS CDE Neg	TAF6	CCGGGGCTTCAGTCGCAAGG	180.046	105.855	0	45.2388	142.951	22.6194	0.158232		KRAS CDE Neutral	INHBB	GCATACCTTCCCACTCACGG	261.407	199.126	0	33.3916	230.266	16.6958	0.0725065	depleted
KRAS CDE Pos	PRTN3	CATGTCCCGCAGGCAGTGCG	155.464	147.897	47.3193	0.619709	151.68	23.9695	0.158026		KRAS CDE Neg	ACRBP	CAAACCAGGAGGCATAAGGG	173.557	192.903	0	26.542	183.23	13.271	0.0724282	depleted
KRAS CDE Neutral	APEH	GATGAGGTCCACATAATACA	324.215	241.74	65.8169	23.549	282.978	44.6829	0.157902		NTC	NTC	ATTATTCCTCCGGATGACGA	3001.89	237.706	0.706104	233.741	1619.8	117.224	0.0723693	depleted
KRAS CDE Neutral	RP1L1	GCTGGTGTGTGCCGGGCATG	215.922	175.675	0.430176	61.3512	195.798	30.8907	0.157768		KRAS CDE Neg	LTF	GAGAAATGGATCTGACTGCC	814.217	652.137	0.706104	105.312	733.177	53.009	0.0723004	depleted
KRAS CDE Neg	ATP6V1C1	TGACTTCCAGTATAATGAAG	391.317	394.893	92.9179	30.9855	393.105	61.9517	0.157596		KRAS CDE Neutral	SH3BP5L	CCTGCCACGTGGGGTCCAGT	443.534	93.3402	2.82442	35.9602	268.437	19.3923	0.0722415	depleted
KRAS CDE Neutral	ZNF730	ATTTGCCACATTTCTCACAT	253.792	183.933	64.5263	4.33796	218.862	34.4322	0.157323		KRAS CDE Neutral	COMMD7	GCCAAGACTGATCTGATTGG	109.277	92.718	0	14.5553	100.997	7.27765	0.0720579	depleted
KRAS CDE Pos	EID2	TCGTAAAGGTTAAAATATCG	249.141	163.663	51.6211	13.0139	206.402	32.3175	0.156576		KRAS CDE Neutral	INHBB	CGAGGTGCGGGATCTCCACG	209.982	255.752	0	33.3916	232.867	16.6958	0.0716966	depleted
KRAS CDE Neg	LIG4	TGGCGTCGAAACATACTGAG	259.107	126.876	0	60.1118	192.991	30.0559	0.155737		KRAS CDE Pos	MAP2K2	GCTCCCCTGCAGGTTCTCCG	287.119	232.106	2.82442	34.2478	259.612	18.5361	0.0713991	depleted
KRAS CDE Neg	KRT28	TATAGTCATGATCAAGTCCA	95.0058	168.918	0	40.9008	131.962	20.4504	0.154972		KRAS CDE Pos	MAGOHB	CTGTCGGCCAACCCTATCAG	38.5682	45.4256	0	5.99336	41.9969	2.99668	0.0713548	depleted
KRAS CDE Neg	POFUT1	GGTGGCATACTGCTTTGAGG	112.944	111.11	0	34.7037	112.027	17.3519	0.15489		KRAS CDE Pos	RTCA	GGTAGCAAAAGATATGGCAG	139.274	88.9844	0	16.2677	114.129	8.13385	0.0712688	depleted
KRAS CDE Pos	TCF3	GCTCAGGTGAGGACTACGGC	152.806	95.3448	29.6821	8.67593	124.076	19.179	0.154575		KRAS CDE Neg	ITGAM	AGAACACCAGGCTGATGGGG	77.1364	151.833	0	16.2677	114.485	8.13385	0.0710473	depleted
KRAS CDE Neg	POLR3F	TTGCCTCATCACATGAAGTG	120.252	123.873	35.7046	1.85913	122.063	18.7819	0.153871		KRAS CDE Neutral	KERA	AATCAAACCACCAATTCCAA	162.843	66.5827	0	16.2677	114.713	8.13385	0.070906	depleted
KRAS CDE Pos	YWHAQ	TTCCCAAGGAGCTTACCAAG	127.56	158.407	0	43.9994	142.984	21.9997	0.153861		KRAS CDE Neutral	PER1	CGCTGGTCCTCAGAAAACCG	107.134	98.3184	0	14.5553	102.726	7.27765	0.0708452	depleted
KRAS CDE Neutral	PCDH18	AAATTTAGCTTGAAAGACAG	164.765	99.0985	40.4365	0	131.932	20.2183	0.153248		NTC	NTC	CCGCGCCGTTAGGGAACGAG	1632.72	85.873	1.41221	119.867	859.296	60.6397	0.070569	depleted
KRAS CDE Neg	NDRG4	CGTAGTGGTCGGGTCCAGTT	352.119	307.055	38.2856	62.5906	329.587	50.4381	0.153034		KRAS CDE Neg	ZBTB2	AATCGGCGATGTATACTTCA	51.4242	43.5588	0.706104	5.99336	47.4915	3.34973	0.0705333	depleted
KRAS CDE Pos	CCNG2	GTACTGCTTCTGACATAAAA	419.221	526.273	102.812	41.5205	472.747	72.1662	0.152653		KRAS CDE Neg	CINP	GTAGGCCACGTGTGGAACAG	0	168.012	0.706104	11.1305	84.0062	5.91832	0.0704509	depleted
KRAS CDE Neutral	IAPP	CCTCATGAAGAAGCTTTGCG	99.6564	99.8493	0	30.3658	99.7528	15.1829	0.152205		KRAS CDE Neutral	SLC6A12	GTTTGTGCTGTCAGTGGCCG	4.28535	67.205	0.706104	4.28097	35.7452	2.49354	0.0697588	depleted
KRAS CDE Neutral	GNPDA2	AAAGCTACCATTCTTATATG	136.861	261.26	53.772	6.8168	199.061	30.2944	0.152187		KRAS CDE Pos	ADPRHL2	AGAGCTTCTAGACCAGGCAT	64.2803	264.464	1.41221	21.4049	164.372	11.4085	0.0694067	depleted
KRAS CDE Pos	YWHAQ	TACCTTGCTGAAGTTGCGTG	280.367	289.037	86.4653	0	284.702	43.2326	0.151852		NTC	NTC	CCCACTTAATAACGCCGCTT	252.836	191.036	0.706104	29.9668	221.936	15.3365	0.069103	depleted
KRAS CDE Neutral	ELF2	AGGAGATTCCATATGAAGCA	347.469	129.879	71.8393	0.619709	238.674	36.2295	0.151795		KRAS CDE Pos	SLC35D3	GTGCCTGACCAGCTCCACCG	83.5644	177.346	0	17.9801	130.455	8.99004	0.0689128	depleted
KRAS CDE Neg	KAT6A	TACGGAAGTCCAGCATTCGT	285.682	105.855	58.5039	0.619709	195.768	29.5618	0.151004		KRAS CDE Neutral	SLC6A12	GGGCCAATGGACCAACAAGA	0	24.8907	0	1.71239	12.4454	0.856194	0.0687963	depleted
KRAS CDE Pos	ICA1L	AGTAGCAACATTCAGTCAAA	286.346	193.693	72.2695	0	240.019	36.1348	0.150549		KRAS CDE Neutral	CASP6	AAATGTGATTGCCTTCGCCA	347.114	311.756	0.706104	44.5221	329.435	22.6141	0.0686451	depleted
KRAS CDE Neg	CDV3	CCTTCTTCCCAGTTATCACC	299.634	262.761	40.4365	43.9994	281.197	42.2179	0.150136		KRAS CDE Pos	OBSCN	CTGGTTGTGCAGGTACTGGG	149.987	235.84	12.7099	13.6991	192.914	13.2045	0.0684477	depleted
KRAS CDE Neutral	S100A7A	TCCTTACCTCGGTCATCAGG	306.277	415.913	0.430176	107.829	361.095	54.1298	0.149904		KRAS CDE Pos	INPP5F	ATACCAATGATGTCTTCGTG	242.122	322.335	0	38.5287	282.229	19.2644	0.068258	depleted
KRAS CDE Neutral	GHR	TTCTGAATATCTGCATTGCG	115.601	154.654	40.4365	0	135.128	20.2183	0.149623		KRAS CDE Neg	DDX5	ATCTACGGTGGTGCTCCTAA	109.277	117.609	0	15.4115	113.443	7.70575	0.0679264	depleted
KRAS CDE Pos	CDCA4	GCTCGACCGCTTGGTCTCCA	19.9313	96.0955	0	17.3519	58.0134	8.67593	0.14955		KRAS CDE Pos	SCRG1	ATTGGGCTAACTTTGCTGCT	242.122	235.84	0.706104	31.6792	238.981	16.1926	0.067757	depleted
KRAS CDE Neg	RASSF8	GGCCTCAGTTTAGCTAAGGG	56.472	82.5821	20.6484	0	69.527	10.3242	0.148492		KRAS CDE Pos	MUC17	GCCTGAGTAGAAGTGGTCAG	119.99	247.04	0	24.8296	183.515	12.4148	0.0676501	depleted
KRAS CDE Pos	SYNJ1	ACATGCTGCTGATATCCAGA	138.19	130.63	0.860351	39.0417	134.41	19.951	0.148434		KRAS CDE Neutral	INS	CCTGCAGAAGCGTGGCATTG	291.404	394.518	0	46.2345	342.961	23.1172	0.0674049	depleted
KRAS CDE Neutral	TRPV1	ACAGGGCTGACTGTGATGGT	144.17	330.328	69.6884	0.619709	237.249	35.1541	0.148174		NTC	NTC	TTCGCCGGCGACGAAGTGCA	1159.19	204.104	0	91.6128	681.646	45.8064	0.0671997	depleted
KRAS CDE Neg	IYD	CATTGATAATGTCATCAGAA	653.082	583.33	0.860351	181.575	618.206	91.2176	0.147552		KRAS CDE Neutral	SENP8	GCAGTCATGAAACTGACTGT	100.706	165.523	0.706104	17.1239	133.115	8.915	0.0669724	depleted
KRAS CDE Neutral	MS4A1	GCAACAGTGCTCATGTACAT	273.058	156.906	62.8056	0	214.982	31.4028	0.146072		KRAS CDE Neg	BZW1	ATACAGTCTTGAAACTGAGT	12.8561	0	0	0.856194	6.42803	0.428097	0.0665985	depleted
KRAS CDE Neutral	NLGN1	GCATTTCTGATATCTGACCA	395.968	443.691	0.860351	121.463	419.83	61.1617	0.145682		KRAS CDE Pos	ATAD3A	GGTGCTCGGCCGCCTTCAGG	72.851	95.8293	0	11.1305	84.3402	5.56526	0.0659859	depleted
KRAS CDE Neutral	CASP6	AGTACAAAATGGACCACAGG	368.064	242.491	51.1909	37.1826	305.278	44.1867	0.144743		NTC	NTC	CATTCGGTCCGTTCATCTCG	143.559	181.702	0	21.4049	162.631	10.7024	0.0658081	depleted
KRAS CDE Pos	PTGIR	AGGCGTAGAAGCGGAAGGCA	407.927	207.206	2.58105	86.1396	307.566	44.3603	0.14423		KRAS CDE Neutral	TAS2R19	TGAGCAAACAAAATATGCTG	128.561	118.853	0	16.2677	123.707	8.13385	0.065751	depleted
KRAS CDE Neg	PTH	TCACTCACAGATCTCTTCCT	617.205	590.837	74.8506	99.1535	604.021	87.002	0.144038		KRAS CDE Neg	CPEB1	CTAGATCGAGAGTCCAGGAT	32.1401	59.1155	0	5.99336	45.6278	2.99668	0.0656766	depleted
KRAS CDE Neg	GRB10	CAAATGCCTTTGGATTACTC	300.298	560.807	116.578	7.43651	430.553	62.0071	0.144017		KRAS CDE Pos	MAGOHB	TCTGGAGTTCGAATTTCGGC	102.848	171.124	0	17.9801	136.986	8.99004	0.0656274	depleted
KRAS CDE Neg	POFUT1	AATCCAAGGAGGGACAGCCA	186.69	278.527	66.6772	0	232.608	33.3386	0.143325		KRAS CDE Neg	RIN2	TATAAGGCAGAGCTGACGCA	186.413	294.955	1.41221	29.9668	240.684	15.6895	0.0651872	depleted
KRAS CDE Pos	LBH	AGGAAAGGCCATCCTTGCGG	212.6	191.44	0	57.633	202.02	28.8165	0.142642		KRAS CDE Neutral	POGK	ACCGGCCCTATTTGATGAGG	42.8535	141.255	0	11.9867	92.0542	5.99336	0.0651069	depleted
KRAS CDE Neutral	HADHA	CATGCACTACTTCTCTCCCG	239.84	247.746	56.353	13.0139	243.793	34.6834	0.142266		KRAS CDE Neg	FURIN	TGACTTGCGGCAGAAGTGCA	269.977	355.315	2.11831	38.5287	312.646	20.3235	0.0650049	depleted
KRAS CDE Neg	SLC10A5	TCAATTCTTATATATACAGT	47.8351	157.657	0	29.1263	102.746	14.5632	0.14174		KRAS CDE Neutral	SH3BP5L	AGCAGCGTTGTGCATGCTTA	582.808	390.784	0.706104	62.5022	486.796	31.6041	0.0649227	depleted
NTC	NTC	AGCACTAGGATCGCGGCCTT	152.806	83.3328	0	33.4643	118.07	16.7321	0.141714		KRAS CDE Neutral	RGMA	GGGTGACCTGGCCTACCACT	242.122	151.211	0.706104	24.8296	196.667	12.7679	0.0649213	depleted
KRAS CDE Pos	GMPPA	ATCAGTGACATCATCAACTG	215.258	73.5731	40.8667	0	144.415	20.4333	0.14149		KRAS CDE Neg	C2orf16	ATAAATTACAGACCACTTCG	141.417	225.883	0.706104	23.1172	183.65	11.9117	0.0648607	depleted
KRAS CDE Pos	UBALD2	CATGATCAACCAGTTCGTGC	176.06	176.425	17.6372	32.2249	176.242	24.931	0.141459		KRAS CDE Neutral	CSN3	TTAACTTACCAAAAAAGGCA	115.705	135.654	0	16.2677	125.68	8.13385	0.064719	depleted
KRAS CDE Neg	DIRAS2	CCGGGAGAGCTACATCCCGA	289.668	170.419	0	65.0695	230.044	32.5347	0.141429		KRAS CDE Neg	SLC10A5	ATATTTCTATCAATATGCAT	565.667	664.582	1.41221	77.9137	615.125	39.663	0.0644795	depleted
KRAS CDE Pos	LRP10	CAGAAGCTACACCTGGCCTG	80.3895	90.0895	0.430176	23.549	85.2395	11.9896	0.140657		KRAS CDE Pos	MAP2K2	CCTCGTTCACAATATAGTCC	42.8535	63.4714	0	6.84956	53.1624	3.42478	0.064421	depleted
KRAS CDE Pos	SLC30A10	GAGGCAGCACGCGAACCAGG	595.281	801.046	83.4541	112.787	698.164	98.1206	0.140541		KRAS CDE Neg	SLC1A3	AATCACAAAACCGAAGCACA	179.985	307.401	1.41221	29.9668	243.693	15.6895	0.0643823	depleted
KRAS CDE Neutral	CSN3	TCTTCTAGTTGTCAATGCCC	403.941	352.1	65.8169	40.2811	378.02	53.049	0.140334		KRAS CDE Neutral	XRCC2	ATACTTCCCAAATCAGAAGG	27.8548	156.189	0.706104	11.1305	92.0221	5.91832	0.0643141	depleted
KRAS CDE Neutral	TMOD3	ATATCTGGAGAAAGAAGCAT	59.7938	93.8433	0.430176	21.0701	76.8186	10.7501	0.139942		KRAS CDE Neg	NUDT4	AGTTCAAGCCCAACCAGACG	2.14268	77.7835	0	5.13717	39.9631	2.56858	0.0642739	depleted
KRAS CDE Pos	ROBO3	ATGGGCTGGGATACACTGAG	224.559	234.233	64.0962	0	229.396	32.0481	0.139706		KRAS CDE Pos	EREG	ATGGAATCACAGTTGTACTG	87.8497	59.7378	0	9.41814	73.7937	4.70907	0.0638139	depleted
KRAS CDE Neg	ARHGEF11	CTTGGGGGAGAGTCATCTGG	634.479	615.612	152.712	21.6898	625.045	87.2011	0.139512		KRAS CDE Neutral	ZNF141	TGCTATCTCTAACCCAGACC	207.84	203.482	1.41221	24.8296	205.661	13.1209	0.0637989	depleted
KRAS CDE Neutral	PTMS	GAAGAAGAAACTGCCGAGGA	289.004	278.527	78.292	0	283.765	39.146	0.137952		KRAS CDE Neutral	MPC2	CCAAATACGAAAAAGCTGAG	156.415	123.209	0.706104	17.1239	139.812	8.915	0.0637641	depleted
KRAS CDE Neutral	SAR1B	ATATTTGATTGGATTTACAG	352.784	466.964	55.9228	57.0132	409.874	56.468	0.137769		NTC	NTC	GTGGGCTGACCGTTCTCGAC	72.851	88.3621	0	10.2743	80.6065	5.13717	0.0637314	depleted
KRAS CDE Neutral	NLGN1	CCAACTTTGGAAAGATAAGA	210.607	238.737	0.430176	61.3512	224.672	30.8907	0.137492		KRAS CDE Neutral	WFDC12	AACTCCTTCCACAGCCACCA	188.556	373.983	0.706104	35.104	281.269	17.905	0.063658	depleted
KRAS CDE Neg	ZBTB2	AATCGGCGATGTATACTTCA	243.826	356.604	0	82.4213	300.215	41.2107	0.13727		KRAS CDE Neutral	TAS2R19	GTTCTTGGAAATGTTGCCAA	220.696	301.8	0.706104	32.5354	261.248	16.6207	0.0636206	depleted
KRAS CDE Pos	INPP5F	GCATTACAGCTCGCAATGTG	135.533	151.651	39.146	0	143.592	19.573	0.13631		KRAS CDE Neg	ST8SIA4	GATCGTCCACCTCTTCCTAA	274.263	507.771	0.706104	48.8031	391.017	24.7546	0.0633083	depleted
KRAS CDE Pos	NAGK	AGATGGTGAACAGGGCCAAA	211.936	119.369	0.430176	44.6191	165.652	22.5246	0.135975		KRAS CDE Pos	FEZ2	AAACCCCTACACAGTCAGAT	139.274	77.1613	0	13.6991	108.218	6.84956	0.0632943	depleted
KRAS CDE Pos	RXFP3	CTTTGGTCCCCGCCGCGCGG	133.54	136.636	0	36.5628	135.088	18.2814	0.13533		KRAS CDE Pos	PBXIP1	GGAAGGTGATGTTTGTGGTG	224.981	235.84	0	29.1106	230.41	14.5553	0.0631712	depleted
KRAS CDE Neg	SCN5A	AGCTGTTGGTGAAGTAGTAG	95.6701	147.146	0	32.8446	121.408	16.4223	0.135265		KRAS CDE Pos	TMEM246	AGAGCAACTTGGCATCAAAA	246.408	305.534	1.41221	33.3916	275.971	17.4019	0.063057	depleted
NTC	NTC	CCGCGCCGTTAGGGAACGAG	69.7595	186.936	0	34.7037	128.348	17.3519	0.135194		KRAS CDE Pos	NAGK	AGATGGTGAACAGGGCCAAA	147.845	124.454	0	17.1239	136.149	8.56194	0.0628865	depleted
KRAS CDE Neg	IL11RA	GTAGCCGAGGGTGTGGTTGG	125.567	275.524	0.430176	53.295	200.545	26.8626	0.133948		KRAS CDE Neutral	DHODH	CATAAATTCCGAAATCCAGT	83.5644	120.72	0	12.8429	102.142	6.42146	0.0628678	depleted
KRAS CDE Neg	STAT5A	ACCTGAAACCATTCACCACG	306.277	183.182	15.4863	49.5767	244.73	32.5315	0.132928		KRAS CDE Neg	PTPN1	GTGGAAGGAGCTTTCCCACG	0	24.8907	0.706104	0.856194	12.4454	0.781149	0.0627663	depleted
KRAS CDE Neg	RAP1B	AGATGAAAGAGTTGTAGGGA	252.463	285.284	1.29053	70.0271	268.873	35.6588	0.132623		KRAS CDE Neg	ARNTL2	TCTGATGATTGAGAGCTACA	379.254	319.846	0	43.6659	349.55	21.833	0.0624602	depleted
KRAS CDE Neg	PSMB10	GTCCCTCACGCACGCAAGAC	78.3964	282.281	32.2632	15.4927	180.338	23.878	0.132406		KRAS CDE Neutral	RABEP1	CATAATGCTGGAAATAAACT	227.124	143.122	0	23.1172	185.123	11.5586	0.0624376	depleted
KRAS CDE Pos	SLC28A1	CAGGATTCATTGCGTTCGAG	236.518	310.809	43.8779	28.5066	273.663	36.1923	0.132251		NTC	NTC	ACCGGTCGAAGTCTGGGATT	0	260.73	0	16.2677	130.365	8.13385	0.0623928	depleted
KRAS CDE Neutral	CXCR5	AGGTCCATTTCCAGCGTTAG	494.296	178.678	14.626	74.3651	336.487	44.4955	0.132236		KRAS CDE Neutral	MOK	ACACGTACAAGATGGACCTG	224.981	324.824	4.23662	29.9668	274.903	17.1017	0.0622101	depleted
KRAS CDE Neg	RCBTB2	GCAAAGCTGCCACTCTGCAA	123.574	114.864	0.430176	30.9855	119.219	15.7078	0.131756		KRAS CDE Neutral	ELF2	TTACAGATACTACTACCAAA	477.817	472.924	28.2442	30.823	475.37	29.5336	0.0621275	depleted
KRAS CDE Neg	TLN2	AACCTGACGGAGATGTCCAA	251.798	253.752	51.6211	14.873	252.775	33.247	0.131528		NTC	NTC	TCCCGGGAGGTACGGTGTAC	550.668	28.6243	0	35.9602	289.646	17.9801	0.062076	depleted
KRAS CDE Neutral	NAGPA	GCACCCGTGTGCAGTCCCGG	340.825	300.298	0	84.2805	320.562	42.1402	0.131457		KRAS CDE Pos	C5orf52	AGCCGCAGATCTGCTTTCCG	6.42803	55.3819	2.11831	1.71239	30.905	1.91535	0.0619755	depleted
KRAS CDE Neutral	ISL2	GCAGGAGGCCGTGGTCGGCG	213.265	150.9	33.5537	14.2533	182.082	23.9035	0.131279		KRAS CDE Neutral	PPP3CA	GAACTAGGGTCAGAAGAAGA	10.7134	3.11134	0	0.856194	6.91236	0.428097	0.0619321	depleted
KRAS CDE Neg	TAF13	CGATGTATGATGTATGGCTT	255.785	218.467	59.3642	2.47884	237.126	30.9215	0.130401		KRAS CDE Pos	CCNG2	GATTCCAACCTCGAGAAAAA	119.99	113.253	0.706104	13.6991	116.621	7.20261	0.0617606	depleted
NTC	NTC	CAACGGTCACGCTAGAATAA	399.954	249.998	66.6772	17.9716	324.976	42.3244	0.130238		KRAS CDE Pos	MEOX2	TTGCCAGCCAGCATCACAGG	113.562	143.122	2.11831	13.6991	128.342	7.90871	0.0616223	depleted
KRAS CDE Pos	FEM1B	TACTGTGGTATGGTTCACGT	213.929	113.363	1.7207	40.9008	163.646	21.3108	0.130225		KRAS CDE Neutral	ZNF195	CAAGACAAGCCTGAGTAGCA	321.401	331.669	0	40.2411	326.535	20.1206	0.0616184	depleted
KRAS CDE Neutral	UGT2B4	TATGGCTTATTCGAAACTAC	53.8144	207.957	0	34.084	130.886	17.042	0.130205		KRAS CDE Pos	LRRN1	AACATACAAATTGAAGACTC	882.783	819.527	3.53052	101.031	851.155	52.2807	0.0614233	depleted
KRAS CDE Pos	CREM	TCTTCAATCTTGGGAACACC	94.3414	158.407	0	32.8446	126.374	16.4223	0.12995		KRAS CDE Pos	HLA-DQB1	AGTCACCATTCCTAATAAGG	132.846	187.925	0	19.6925	160.385	9.84624	0.0613911	depleted
KRAS CDE Pos	LOR	GACTGCGTGAAGACCTCTGG	454.433	406.904	108.834	1.85913	430.669	55.3468	0.128514		NTC	NTC	GTCAAGCCGAACGCTGCCGG	1926.27	124.454	0.706104	125.004	1025.36	62.8552	0.0613007	depleted
NTC	NTC	CTCGTGAAACAAGATCCGAC	118.259	12.0119	15.4863	1.23942	65.1354	8.36287	0.128392		KRAS CDE Neg	NDRG4	TTCAGGAAGGTCGTAGTGGT	111.419	244.551	2.11831	19.6925	177.985	10.9054	0.0612713	depleted
KRAS CDE Neg	TGM3	AGACACCTACCATTCAGCCA	364.078	379.878	27.9614	67.5483	371.978	47.7549	0.128381		NTC	NTC	GTTATTTGTCTGTCGAAACG	192.841	84.6285	0.706104	16.2677	138.735	8.4869	0.0611736	depleted
KRAS CDE Neutral	GPR139	ACATGATGTGTACCAGCCAG	431.844	357.355	5.16211	96.0549	394.6	50.6085	0.128253		KRAS CDE Pos	CYP1B1	AATGTGGTAGCCCAAGACAG	576.38	347.848	1.41221	54.7964	462.114	28.1043	0.0608169	depleted
KRAS CDE Neg	AP4E1	CATATGCTCCTGATAATGCA	204.628	214.713	0.430176	53.295	209.671	26.8626	0.128118		KRAS CDE Neutral	KCTD1	AAATATCAACAGCTACAGAA	137.131	128.81	0.706104	15.4115	132.97	8.0588	0.060606	depleted
KRAS CDE Neg	WDR93	GCTCCTCATCTGGATCCACG	611.89	649.395	97.2197	63.8301	630.643	80.5249	0.127687		KRAS CDE Pos	ZNF408	CCAGCCAGAACTCTGCTCAC	154.273	112.008	0.706104	15.4115	133.14	8.0588	0.0605286	depleted
KRAS CDE Neg	NACA2	GATCTCACGCACCTTCCATA	411.249	283.031	51.1909	37.1826	347.14	44.1867	0.127288		KRAS CDE Pos	DUSP2	GCTGCTGCACGAGACCCGCG	55.7096	114.497	0	10.2743	85.1035	5.13717	0.0603638	depleted
KRAS CDE Neg	PGBD1	ACAGGACATGCACCCAATGG	125.567	234.233	45.1684	0.619709	179.9	22.8941	0.12726		NTC	NTC	CCCGCCTGGCGATTCACGGG	220.696	135.032	0	21.4049	177.864	10.7024	0.060172	depleted
KRAS CDE Pos	TMEM65	AAAAAGCCAAACCCTATGAA	69.0951	346.845	0.860351	52.0556	207.97	26.458	0.12722		KRAS CDE Neutral	RPSA	CTAAGTGGGTTCCTGCTGCA	25.7121	57.2487	0.706104	4.28097	41.4804	2.49354	0.0601136	depleted
KRAS CDE Neg	NCOA6	TTTGAGACTAAATTCTGCGA	273.723	236.485	64.0962	0.619709	255.104	32.3579	0.126842		KRAS CDE Neutral	ZCCHC6	CTAGGCTCACCATTAACCAA	14.9987	11.2008	0.706104	0.856194	13.0998	0.781149	0.0596307	depleted
NTC	NTC	GCTTCTACTCGCAACGTATT	361.42	452.7	2.58105	100.393	407.06	51.487	0.126485		KRAS CDE Pos	DDAH1	TTTGAAGAGTTTCTGCAGCA	319.259	194.148	1.41221	29.1106	256.703	15.2614	0.0594516	depleted
KRAS CDE Neg	VAPA	TTCATTCGGATCATAGTCAA	659.725	1015.01	71.8393	139.435	837.367	105.637	0.126154		NTC	NTC	GCGCGAGGGCACCGACAAGT	602.092	40.4474	2.82442	35.104	321.27	18.9642	0.0590289	depleted
KRAS CDE Neg	RAF1	GACTTCTCCACGAACACAAA	24.5819	119.369	13.7656	4.33796	71.9753	9.05179	0.125763		KRAS CDE Pos	SPEN	GGGAATAGCGAAAAACCGCC	289.261	131.921	0	24.8296	210.591	12.4148	0.0589523	depleted
KRAS CDE Neutral	PPP3CA	GAACTAGGGTCAGAAGAAGA	107.629	180.93	0.860351	35.3234	144.279	18.0919	0.125395		KRAS CDE Neutral	NUDT5	GGCTTCCTCAATTATCTGCC	158.558	227.128	2.11831	20.5487	192.843	11.3335	0.0587706	depleted
KRAS CDE Pos	GMPPA	TCAAGGCTTCAGGAGAAAAG	110.286	72.8224	0	22.9292	91.5544	11.4646	0.125222		NTC	NTC	TCGTGTCTAGCTATCGAGTG	2050.54	253.885	0.706104	134.423	1152.21	67.5643	0.0586387	depleted
KRAS CDE Neutral	DNAJC6	GTAGGTCACACATATAGCCC	178.053	98.3478	33.9839	0.619709	138.2	17.3018	0.125194		KRAS CDE Pos	PAPOLG	AAGTCTGATAGCCCTTCTGT	310.688	266.331	14.1221	19.6925	288.509	16.9073	0.0586022	depleted
KRAS CDE Neg	TLN2	CCTCTTTCCTTACCTCCAGT	246.483	213.963	0	57.633	230.223	28.8165	0.125168		KRAS CDE Neutral	PRDM9	TTTCCTGGTGACAGGTGTCG	47.1389	118.231	2.82442	6.84956	82.6849	4.83699	0.058499	depleted
KRAS CDE Neutral	UBTD2	ACATAACATTACCACATGGT	134.868	283.782	0	52.0556	209.325	26.0278	0.124341		KRAS CDE Neutral	DEFA6	AGCTTATGAGGCTGATGCCC	344.971	311.134	0.706104	37.6726	328.053	19.1893	0.0584947	depleted
KRAS CDE Neg	GFPT2	AATTGAGCTGCCCCACACTG	93.0126	120.119	26.2407	0	106.566	13.1204	0.12312		KRAS CDE Pos	NAT16	GGTGAACGTGATCGACGCCG	104.991	97.6961	0.706104	11.1305	101.344	5.91832	0.0583985	depleted
KRAS CDE Neutral	DGCR6	GCGACACTACCAGCTGCTGT	294.319	143.393	0.430176	53.295	218.856	26.8626	0.122741		KRAS CDE Pos	TNFSF18	TCAGACACCTTATTCACGCA	319.259	538.884	2.11831	47.9469	429.072	25.0326	0.0583413	depleted
KRAS CDE Neg	GRK7	AGCCACTCGCTCTTCCTCAG	203.299	328.827	0	65.0695	266.063	32.5347	0.122282		NTC	NTC	GTTTCCCGGGACTGTCGCGT	122.133	143.122	0	15.4115	132.627	7.70575	0.0581009	depleted
KRAS CDE Neutral	ACOX3	GCTCTGACCGAATTAAGCCA	161.443	122.372	0	34.7037	141.907	17.3519	0.122276		KRAS CDE Neg	CACNB3	AAAATGTTGTAGGAGCCCGT	158.558	219.661	1.41221	20.5487	189.109	10.9804	0.0580639	depleted
KRAS CDE Pos	SPSB4	AGCGCATGGTGACTTCACAG	253.792	231.23	56.7832	2.47884	242.511	29.631	0.122184		NTC	NTC	GATTGAGAAGCCGCGGTATC	192.841	69.0718	1.41221	13.6991	130.956	7.55566	0.057696	depleted
KRAS CDE Pos	ATXN7L2	GCATTTCTGAGAGCTGGCAG	225.223	118.618	41.727	0	171.921	20.8635	0.121355		NTC	NTC	TAGATGGTGCTTCTGTCGCG	158.558	108.897	0	15.4115	133.728	7.70575	0.0576228	depleted
KRAS CDE Neg	MMAA	TTACTACTGCCACCAGCAGG	447.125	539.036	1.29053	118.364	493.08	59.8275	0.121334		KRAS CDE Neutral	TMOD3	AACTTTGAAGAGCTTAAATG	293.547	390.784	0	39.3849	342.166	19.6925	0.0575525	depleted
KRAS CDE Neutral	PLCG2	AGTGGCATGAGCAAGAAAGT	203.963	78.8284	0	34.084	141.396	17.042	0.120527		KRAS CDE Pos	NAT16	TTCCGGCTTAGGGACCTCTG	66.423	80.2726	0.706104	7.70575	73.3478	4.20593	0.0573422	depleted
KRAS CDE Pos	SLC26A9	CCACACCATAGGGCAGGCTG	223.895	292.04	1.29053	60.7315	257.967	31.011	0.120213		KRAS CDE Pos	RERGL	AGAAGCACTTGTGTTTGGAA	171.414	337.269	0	29.1106	254.342	14.5553	0.0572274	depleted
KRAS CDE Pos	CRYAA	GCTGGGGTAGAAGGGCCCCA	69.7595	55.5552	15.0561	0	62.6573	7.52807	0.120147		KRAS CDE Neutral	UBN1	AGAGGGCTTTAGGGACGGCG	59.9949	150.589	0	11.9867	105.292	5.99336	0.0569214	depleted
KRAS CDE Neutral	ARID3C	CCTACCCACCACCATCACCT	596.61	518.766	83.0239	50.8162	557.688	66.92	0.119996		KRAS CDE Neg	OR1A1	AATACAAAGAGACAACCGTG	59.9949	164.901	4.23662	8.56194	112.448	6.39928	0.0569088	depleted
KRAS CDE Neg	EXOSC8	TTGCTCCTGCTGGAATACCA	346.14	260.509	0	72.506	303.324	36.253	0.119519		KRAS CDE Neutral	WFDC9	ATGACGAGTAGAAGAATCCA	70.7083	137.521	0.706104	11.1305	104.115	5.91832	0.0568441	depleted
NTC	NTC	AAGGCCTTAACACGTCGACC	49.8282	259.758	0.430176	36.5628	154.793	18.4965	0.119492		KRAS CDE Neg	MGAT2	AGGCGGACAACCTGACGCTG	162.843	241.44	0.706104	22.2611	202.142	11.4836	0.0568095	depleted
KRAS CDE Pos	SCRG1	GGTCAGCTACTCCTTCCGGA	666.369	472.219	82.5937	53.295	569.294	67.9444	0.119348		KRAS CDE Pos	CC056	GGAGTAGATGACAGGCCAGA	222.838	139.388	0	20.5487	181.113	10.2743	0.0567288	depleted
KRAS CDE Neutral	C14orf159	CTCTGAGATAGCACCTTGAG	182.039	361.109	1.29053	63.2103	271.574	32.2504	0.118754		KRAS CDE Neg	MRPL45	ATATCATCTCTTTCAAAGGA	194.984	64.0936	0	14.5553	129.539	7.27765	0.0561813	depleted
KRAS CDE Neutral	GNPDA2	AATCTGCAGCATTCCCGTCA	230.538	289.788	0.430176	61.3512	260.163	30.8907	0.118736		KRAS CDE Neutral	LEO1	ACCCTTATAGAATCTGCAAG	302.117	383.94	0	38.5287	343.028	19.2644	0.0561597	depleted
KRAS CDE Neutral	TMOD3	GTTAAGAGATAATGAAACCC	124.903	102.101	26.2407	0.619709	113.502	13.4302	0.118326		KRAS CDE Pos	HLA-DRB5	AGACATCTATAACCAAGAGG	535.669	605.467	0.706104	63.3584	570.568	32.0322	0.056141	depleted
KRAS CDE Neutral	DHODH	CATAAATTCCGAAATCCAGT	205.957	232.731	0.430176	51.4359	219.344	25.933	0.11823		KRAS CDE Neutral	VAC14	GATGCCCTGCCAAAGCAGGA	188.556	281.888	0.706104	25.6858	235.222	13.196	0.0561002	depleted
KRAS CDE Neg	TCF7L2	GTTCTGCTCCTCATACGCCA	479.015	568.315	75.2807	48.3373	523.665	61.809	0.118032		KRAS CDE Neg	PTPN1	CGTCATGCTCAACAGAGTGA	567.809	271.931	0	47.0907	419.87	23.5453	0.0560777	depleted
KRAS CDE Neutral	SH3BP5L	CATCCAGCTGTAGTTCCACC	485.659	194.443	26.2407	53.295	340.051	39.7679	0.116947		KRAS CDE Neutral	HORMAD1	TATCCTGTATCACGTATTTG	327.83	207.215	0	29.9668	267.522	14.9834	0.056008	depleted
KRAS CDE Neg	CD2BP2	GACCCCCTGACCCAGCCACA	372.051	433.181	91.6274	2.47884	402.616	47.0531	0.116869		KRAS CDE Neg	XYLT1	GAGCCGGCTGCAGCCCGAGG	147.845	115.742	0	14.5553	131.793	7.27765	0.0552202	depleted
KRAS CDE Neg	USF2	TGCTTCAGACAGGAACACAG	155.464	227.476	44.7383	0	191.47	22.3691	0.116828		KRAS CDE Pos	MARVELD3	GCAGGAAGCGAAGCAGCGAC	29.9975	246.418	4.94273	10.2743	138.208	7.60853	0.0550514	depleted
KRAS CDE Neg	XKR4	CAGCACCGAGGACAGCGCCA	191.34	147.897	0.430176	39.0417	169.619	19.7359	0.116355		KRAS CDE Pos	YWHAQ	GCTGAGATCCATCTGCACCA	284.976	266.953	14.8282	15.4115	275.965	15.1198	0.0547891	depleted
KRAS CDE Pos	OR52E8	CCAGTGGAACAACCATGTAC	837.778	735.731	135.075	47.7176	786.755	91.3964	0.116169		KRAS CDE Pos	HIST3H2A	GCCACCCTGCTTACCACGAC	117.847	163.657	0	15.4115	140.752	7.70575	0.054747	depleted
KRAS CDE Neg	ZNF266	ATTTGAATCCCACTGGAGGT	140.183	207.206	0	40.2811	173.695	20.1406	0.115954		KRAS CDE Neg	CHID1	CTGGACGCAGGCTCGAACCC	143.559	104.541	0.706104	12.8429	124.05	6.77451	0.054611	depleted
KRAS CDE Neutral	TEX29	ACAGAAGTCCAGCGAAAAGG	336.174	240.99	40.4365	26.0278	288.582	33.2321	0.115157		KRAS CDE Neutral	TATDN1	TAATGAAAAGAAATAGAGAT	175.699	113.253	6.35494	9.41814	144.476	7.88654	0.0545871	depleted
KRAS CDE Pos	YIPF5	CATCCGTTAAAAGTAGCAGA	244.49	317.566	0.430176	63.8301	281.028	32.1301	0.114331		KRAS CDE Pos	GOLGA8O	TCACCTCATACAATTCCAGG	370.683	377.717	0	40.2411	374.2	20.1206	0.0537696	depleted
KRAS CDE Pos	SPEN	CGCAAGGCATGAGTTCCAGG	218.58	108.858	0.860351	36.5628	163.719	18.7116	0.114291		KRAS CDE Neg	ARHGEF11	GTGCCTGGTGGCATTCCGCA	100.706	154.945	0	13.6991	127.825	6.84956	0.0535853	depleted
KRAS CDE Pos	CYP1B1	GTGGCCACTGATCGGAAACG	299.634	391.89	60.2246	18.5913	345.762	39.4079	0.113974		KRAS CDE Neutral	UBTD2	CTGGCACAAGCAATCATTGA	53.5669	122.587	0	9.41814	88.0769	4.70907	0.0534654	depleted
KRAS CDE Neg	PTPN1	CCTGTAGCAGAGGTAAGCGC	264.422	326.575	67.1074	0	295.498	33.5537	0.11355		KRAS CDE Neg	PANK3	GTGTACATCCCGAATGCCGG	98.5631	125.698	0	11.9867	112.131	5.99336	0.0534498	depleted
KRAS CDE Neutral	ADSL	CGCATGGGATTCCGCTTATA	107.629	231.23	0	38.422	169.429	19.211	0.113386		KRAS CDE Pos	ASB18	GGTGTCGCACGCAGGCGGTG	145.702	110.764	0	13.6991	128.233	6.84956	0.053415	depleted
KRAS CDE Neutral	ANP32A	AGCGATAACAGAGTCTCAGG	197.984	283.031	53.772	0.619709	240.508	27.1958	0.113077		KRAS CDE Neutral	GPR150	CTGCAGCTCACTCAAGATGA	475.674	294.333	0	41.0973	385.004	20.5487	0.0533727	depleted
KRAS CDE Neg	TAF13	ATATCCACTGACTCAGTATA	248.477	289.788	0	60.7315	269.132	30.3658	0.112828		KRAS CDE Neg	DUSP11	TACATTGAAGACCTTCAGAA	224.981	237.706	0.706104	23.9734	231.344	12.3398	0.0533396	depleted
KRAS CDE Neg	SLC2A13	TACCAAAGGTAAGCTTTCTG	253.792	235.734	4.73193	50.1964	244.763	27.4642	0.112207		NTC	NTC	ACCAACGCTACGATCCCGGA	2734.06	27.3798	0.706104	145.553	1380.72	73.1296	0.0529649	depleted
KRAS CDE Pos	GRB2	CAATTCTTTGAATGAGCTGG	156.128	258.257	0.430176	45.8585	207.193	23.1443	0.111704		NTC	NTC	ATATTGTCCCATACGATCGG	197.126	142.499	0	17.9801	169.813	8.99004	0.0529409	depleted
KRAS CDE Pos	SCRG1	TCCCATCCCAGAAATGATCC	437.824	556.303	59.3642	50.8162	497.063	55.0902	0.110831		KRAS CDE Neutral	HAL	GTTCCTTTCTCTGGGACATA	462.818	532.039	19.0648	33.3916	497.429	26.2282	0.0527275	depleted
NTC	NTC	CGGGCGTCACCTGCTAGTAA	271.73	446.694	38.7158	40.9008	359.212	39.8083	0.110821		KRAS CDE Neg	RASSF8	TGAAGTCACAACTTGCCAGG	263.549	362.782	23.3014	9.41814	313.166	16.3598	0.05224	depleted
KRAS CDE Pos	SLC30A10	GAAGATGGTGAAGCAGAGCG	342.154	243.993	0.430176	64.4498	293.073	32.44	0.110689		KRAS CDE Neg	OR2T5	ACTGATGAAAAAGTACATGG	248.55	1375.21	0	84.7632	811.882	42.3816	0.0522017	depleted
KRAS CDE Pos	SPSB4	GTGCCGGAGATCCATCCGCT	423.207	260.509	0.430176	74.9848	341.858	37.7075	0.110302		KRAS CDE Neutral	DCAKD	CAAGTACATGAAGCACACCG	257.121	135.654	0.706104	19.6925	196.388	10.1993	0.0519344	depleted
KRAS CDE Pos	OR52E8	TGCTATGGAGAGCATTGTGT	172.073	126.876	0.430176	32.2249	149.475	16.3275	0.109233		KRAS CDE Neg	PIEZO1	GTCGCGAGAGGGTCTCCCAG	107.134	137.521	0.706104	11.9867	122.328	6.34641	0.0518805	depleted
KRAS CDE Neutral	CCDC58	AAGTGGTAAATGACAGGAGC	162.108	205.704	40.0063	0	183.906	20.0032	0.108768		KRAS CDE Pos	ANKRD45	TTTACAACCTGCTCTCACAG	102.848	175.48	0.706104	13.6991	139.164	7.20261	0.0517562	depleted
KRAS CDE Pos	ALDH8A1	TTCCAGGTCAGCAAGTAGAG	100.985	85.5851	0.430176	19.8307	93.2851	10.1304	0.108596		KRAS CDE Neg	SLC1A3	AAGAACCCGGAGTCCCAGCG	231.409	133.165	0	18.8363	182.287	9.41814	0.0516665	depleted
KRAS CDE Neg	RPE	TGTCTTTAATCAAAGCCCCT	378.03	206.455	62.8056	0.619709	292.243	31.7127	0.108515		KRAS CDE Neg	SCN10A	CCAGTTTGCAGCAGGGACAG	287.119	245.796	15.5343	11.9867	266.457	13.7605	0.0516424	depleted
KRAS CDE Pos	GOLGA8O	ACGAGAGACAGAAAGCCGAA	657.732	322.07	68.3979	37.8023	489.901	53.1001	0.108389		KRAS CDE Neutral	FILIP1L	ACTCCAATATGGTTTGCCTA	216.41	179.836	0.706104	19.6925	198.123	10.1993	0.0514796	depleted
KRAS CDE Neg	NACA2	CTGAGATAAATCTTGGATCT	184.696	360.358	58.9341	0	272.527	29.467	0.108125		KRAS CDE Pos	AGFG1	CCATTTCAGACCAATGCCAG	109.277	57.2487	0	8.56194	83.2626	4.28097	0.0514153	depleted
KRAS CDE Pos	CREM	GATGAATCTGCAGAATCAGA	233.86	157.657	2.58105	39.6614	195.759	21.1212	0.107894		NTC	NTC	TTGTCAACTTCGGCCAACGC	1587.72	45.4256	0	83.9071	816.574	41.9535	0.0513775	depleted
KRAS CDE Pos	FRMD3	GCTCAAACTCTGGTGTCTGG	87.0332	232.731	0.860351	33.4643	159.882	17.1623	0.107344		KRAS CDE Pos	MRVI1	GGAGCTTAGTCAGGAGACCA	426.393	291.222	0.706104	35.9602	358.807	18.3331	0.0510947	depleted
KRAS CDE Pos	EMB	CCCTGGCCTCCAGCAGGCCG	57.8007	227.476	0.860351	29.746	142.638	15.3032	0.107287		KRAS CDE Pos	PHC2	GTGGTGGTGTGATCCTGCTG	261.407	182.325	2.11831	20.5487	221.866	11.3335	0.0510827	depleted
KRAS CDE Pos	AGFG1	AAAGCTGGTGGGAAGACTGT	479.015	423.421	72.2695	23.549	451.218	47.9092	0.106178		KRAS CDE Neutral	KCNAB3	CCTTCTCCCTCTGAAACAGA	92.1351	273.798	0.706104	17.9801	182.967	9.34309	0.0510645	depleted
KRAS CDE Neg	OR5C1	TGTCCCGTACATCATGGCCA	83.7114	190.69	0	29.1263	137.2	14.5632	0.106145		KRAS CDE Pos	TGOLN2	TAAAGTCACCCGGCGGCCAA	152.13	74.0499	2.11831	9.41814	113.09	5.76823	0.0510056	depleted
KRAS CDE Pos	CCDC3	AAACAAGGCCTTCTGCACCG	81.7182	71.3209	1.29053	14.873	76.5196	8.08177	0.105617		KRAS CDE Neutral	ABCF3	GGGCATAGTCATCTGAGCAA	674.943	636.58	60.7249	5.99336	655.762	33.3592	0.0508708	depleted
KRAS CDE Pos	CR1	TCTATGCGCTGCACACCCCA	759.382	732.728	55.4927	101.632	746.055	78.5625	0.105304		KRAS CDE Neg	TLN2	GGACACAGTTCTCCACCGAG	297.832	310.512	0	30.823	304.172	15.4115	0.0506671	depleted
KRAS CDE Pos	ZIC1	GTCGCACATCTTGCAAAGAT	108.958	126.876	0	24.7884	117.917	12.3942	0.10511		KRAS CDE Neutral	HORMAD1	AGAGAAGATAAAAATTGCCC	171.414	166.768	0	17.1239	169.091	8.56194	0.0506351	depleted
KRAS CDE Neutral	DGCR6	TCTGTAACGCCGACAGCAGC	204.628	208.707	0	43.3796	206.668	21.6898	0.10495		KRAS CDE Neg	TP53I3	CCAGGAGGATGGCAGCGCGG	2.14268	31.7357	0	1.71239	16.9392	0.856194	0.0505452	depleted
KRAS CDE Neg	RAP1B	AGAGTTGTAGGGAAGGAACA	31.2257	219.218	26.2407	0	125.222	13.1204	0.104777		KRAS CDE Pos	DBNDD2	CTCGCTCGCAGCTCGCCCGG	55.7096	113.875	0	8.56194	84.7923	4.28097	0.0504877	depleted
KRAS CDE Neutral	MYH6	CCTCCACTTCCGACTGGAGC	199.313	227.476	1.29053	43.3796	213.394	22.3351	0.104666		NTC	NTC	TTCGAAGTCTAACCCGCGGG	92.1351	95.207	0	9.41814	93.6711	4.70907	0.0502724	depleted
KRAS CDE Neutral	OR3A3	GTGGGCATCTTCTATGGGAC	156.793	118.618	28.8218	0	137.705	14.4109	0.10465		KRAS CDE Neg	POFUT1	CAGGCCACTACAGAAGTACA	304.26	241.44	0	27.3982	272.85	13.6991	0.0502075	depleted
KRAS CDE Neutral	CCDC58	ATACATATAGGAATTACTCA	399.954	447.445	86.0351	2.47884	423.7	44.257	0.104454		KRAS CDE Pos	PRPF38A	ACTTGTAGTCGATAAAGCCA	17.1414	0	0	0.856194	8.57071	0.428097	0.0499489	depleted
KRAS CDE Neutral	PLCG2	GCACTTCTATGATCTTGTCG	175.395	150.9	32.6933	1.23942	163.148	16.9664	0.103994		KRAS CDE Neg	PREX1	GGACAAAGGACTTCATGAGG	70.7083	152.456	0	11.1305	111.582	5.56526	0.049876	depleted
KRAS CDE Pos	DDX60	GGAAACAATTCGTAGGAAAG	32.5544	194.443	0	23.549	113.499	11.7745	0.103741		KRAS CDE Neutral	DHX57	AAGTTTGTCACCAAGAACGA	257.121	172.368	0	21.4049	214.745	10.7024	0.0498379	depleted
KRAS CDE Neg	PELI2	TTTGGAAGAGTCAAATCCGG	715.533	391.89	113.997	0.619709	553.711	57.3081	0.103498		KRAS CDE Neg	NACA2	AACAGAGTCGGAGTGAAAAG	634.232	436.21	52.9578	0	535.221	26.4789	0.0494728	depleted
KRAS CDE Neutral	BASP1	CAAAGCTGCTGAGGCCGCCG	475.029	415.163	40.0063	52.0556	445.096	46.031	0.103418		KRAS CDE Neg	C10orf99	GGAAAGGACTAGAAGCCTCA	70.7083	166.146	1.41221	10.2743	118.427	5.84327	0.0493407	depleted
KRAS CDE Neg	KRTAP4-2	ACCTGCTGCCGCCCCAGCTG	222.566	222.972	0	45.8585	222.769	22.9292	0.102928		KRAS CDE Neg	CCNT2	TCATCTGGAATGTAACCTGG	372.826	598	1.41221	46.2345	485.413	23.8234	0.0490785	depleted
KRAS CDE Neg	WDR46	GTAATACTCCAGAGGTTCCA	582.658	474.472	108.404	0	528.565	54.2021	0.102546		KRAS CDE Neutral	RP1L1	GAGCGCACCCCAAAGGAGAG	415.679	352.826	0	37.6726	384.253	18.8363	0.0490206	depleted
KRAS CDE Neg	CFLAR	GTTTCTCCAACTCAACCACA	346.14	290.539	64.5263	0.619709	318.339	32.573	0.102322		KRAS CDE Neg	SPG21	TGAAGGAATTGCAGAGGATT	732.795	433.099	5.64883	51.3717	582.947	28.5102	0.0489071	depleted
KRAS CDE Neutral	OR7D2	CTTCATGAACCTCAGCCTGG	273.723	509.006	27.9614	52.0556	391.364	40.0085	0.102228		NTC	NTC	GACGTCTAATTTCTGGCCGT	923.494	54.7596	0.706104	47.0907	489.127	23.8984	0.0488593	depleted
KRAS CDE Neutral	TEX29	AATTGCTTCAGGAGGTGCCG	69.0951	234.233	0	30.9855	151.664	15.4927	0.102152		KRAS CDE Pos	JAM3	CAATGATGTACCACTGCCCA	44.9962	136.277	2.82442	5.99336	90.6365	4.40889	0.0486436	depleted
KRAS CDE Pos	MARVELD3	GGTGGAATATTACCAGTCAG	180.046	234.233	42.1572	0	207.139	21.0786	0.101761		KRAS CDE Pos	SLC35D3	CCACCGAGATGCCCAGCACG	145.702	168.635	2.11831	12.8429	157.168	7.48061	0.0475962	depleted
KRAS CDE Neutral	KLB	GGGTTGGTTATCGATCACGT	209.943	272.521	0	48.957	241.232	24.4785	0.101473		KRAS CDE Neutral	MS4A1	GTGTGGTACCCTCTCTGGGG	139.274	185.436	0	15.4115	162.355	7.70575	0.0474624	depleted
NTC	NTC	ACGCGAAGTGTCGCAGAGTG	208.614	159.909	0	37.1826	184.261	18.5913	0.100896		KRAS CDE Neg	PANK3	TTGGCATCGCTCAGGTTCTG	27.8548	31.7357	2.82442	0	29.7952	1.41221	0.0473971	depleted
KRAS CDE Neg	RTN4RL1	GTTGTTCGAGTAGATCCACA	367.4	167.416	0	53.9147	267.408	26.9574	0.10081		KRAS CDE Neg	PAX1	CCTCTATGCCTCTCACGCGG	160.701	435.588	0	28.2544	298.144	14.1272	0.0473838	depleted
KRAS CDE Neg	OR5C1	AGAGAACCTCACCCGGGCCG	415.899	595.342	31.833	70.0271	505.621	50.9301	0.100728		NTC	NTC	AAGCACAAGAACGGTCCGCC	1889.84	174.235	0.706104	96.75	1032.04	48.728	0.0472154	depleted
KRAS CDE Pos	MEOX2	ACAGCAAACCCAGGAAAGAA	0	184.684	0	18.5913	92.3418	9.29564	0.100666		KRAS CDE Neg	CCNT2	TCACATTTAGTATCCAGCAG	188.556	174.857	0	17.1239	181.706	8.56194	0.0471196	depleted
KRAS CDE Pos	MAP2K2	CAAGAACCCAGCGGAGCGGG	152.142	265.013	0.430176	41.5205	208.578	20.9753	0.100564		KRAS CDE Pos	RCN2	GATTATGACAAAGATAACGA	224.981	280.643	0.706104	23.1172	252.812	11.9117	0.0471167	depleted
KRAS CDE Neutral	BASP1	GATCTCGTAGAACACACAGC	217.915	294.293	32.2632	19.211	256.104	25.7371	0.100495		KRAS CDE Pos	GIPC1	TCAGCGTGAAGGTACGGCCT	212.125	130.054	0.706104	15.4115	171.09	8.0588	0.0471028	depleted
KRAS CDE Neg	TRIM49C	TGTCTGTAATATGTATCGGA	110.286	247.746	0	35.9431	179.016	17.9716	0.100391		KRAS CDE Neutral	ST3GAL6	TTAAGCCACATGATTTAAGG	29.9975	0	1.41221	0	14.9987	0.706104	0.0470776	depleted
KRAS CDE Neg	ZNF266	CAAAGAGTTAGCCCTTCAGC	230.538	105.104	0	33.4643	167.821	16.7321	0.0997021		KRAS CDE Neutral	CXCR5	AATGGACCTCGAGAACCTGG	321.401	291.222	1.41221	27.3982	306.312	14.4052	0.047028	depleted
KRAS CDE Neutral	LYZ	TGTAATGATGGCAAAACCCC	198.648	361.109	18.4976	36.5628	279.879	27.5302	0.0983648		NTC	NTC	GACCAACCTTACGGTAACTC	2723.34	74.0499	2.11831	129.285	1398.7	65.7018	0.0469736	depleted
KRAS CDE Neutral	SOHLH2	GGAGTGAAGTCTCACATAGG	353.448	481.979	2.15088	79.9425	417.714	41.0467	0.0982652		KRAS CDE Neutral	RAB3IL1	GGAATGTGAGCGGCTGTCCA	134.989	47.2924	0	8.56194	91.1405	4.28097	0.0469711	depleted
KRAS CDE Neg	LZTFL1	CCACAGCTTGTAATCCATTG	819.84	897.142	76.1411	92.3367	858.491	84.2389	0.0981244		KRAS CDE Neutral	PRDM9	CTTCTTCTGGGCTCTCCTCT	638.518	683.251	2.11831	59.9336	660.884	31.026	0.0469461	depleted
KRAS CDE Neg	CEP250	CCTAGAGATCAGCAAGGCCA	51.1569	24.7746	0	7.43651	37.9658	3.71826	0.097937		KRAS CDE Neg	OSTC	GTTCTATGACTGATGAACAT	119.99	154.323	0	12.8429	137.156	6.42146	0.0468186	depleted
KRAS CDE Pos	ANKRD45	CAAAGTTTCCAAACGACCCC	439.817	240.99	0.860351	65.6892	340.403	33.2748	0.097751		KRAS CDE Pos	CR1	CAAAACGGGCATTACATTGG	109.277	146.855	0	11.9867	128.066	5.99336	0.046799	depleted
NTC	NTC	GTGATGGCCACGTCCGAACC	27.2394	112.612	0	13.6336	69.9257	6.8168	0.0974864		KRAS CDE Neg	GRK7	GCACTGTGGCTAGGAAGTCA	98.5631	283.754	0.706104	17.1239	191.159	8.915	0.0466366	depleted
KRAS CDE Pos	JAM3	CTGCACTGCCAGGAGAGTGA	83.047	209.458	0	28.5066	146.253	14.2533	0.0974568		KRAS CDE Neg	OR1A1	GAACATCAGAGCAAATGGCT	83.5644	156.189	0	11.1305	119.877	5.56526	0.0464248	depleted
KRAS CDE Neutral	PFKFB2	TGATGCCACCAATACAACCC	150.149	243.993	36.9951	1.23942	197.071	19.1173	0.0970071		KRAS CDE Pos	SLC28A1	AGCTGCTCCTGATCTCTGCG	244.265	187.303	10.5916	9.41814	215.784	10.0048	0.0463651	depleted
KRAS CDE Neutral	PRDM11	AACCGCTATAAGTCCATAGA	459.084	427.925	72.6997	13.0139	443.505	42.8568	0.0966321		KRAS CDE Neutral	NLGN1	AAATATATATGTCCCGACTG	199.269	370.25	0.706104	25.6858	284.759	13.196	0.0463408	depleted
KRAS CDE Pos	YWHAQ	AGTTAAGAGCAAGCCCCAGG	174.731	90.8403	0.860351	24.7884	132.786	12.8244	0.0965795		KRAS CDE Pos	CBWD1	TCCAGAGTGGATGCACAAAG	284.976	192.903	0.706104	21.4049	238.94	11.0555	0.0462689	depleted
KRAS CDE Pos	PPID	TCTTTGACGTGGACATCGGA	110.951	63.0627	0	16.7321	87.0067	8.36607	0.0961543		KRAS CDE Neg	RNMT	CTGTCAAACAGTGTCAGCAG	162.843	98.3184	0	11.9867	130.581	5.99336	0.0458977	depleted
KRAS CDE Pos	IL36RN	AATAACCAGCTTCTAGCTGG	220.573	223.722	0.430176	42.1402	222.148	21.2852	0.0958156		KRAS CDE Neg	XYLT1	CCCAAGTCCGCTCATCACCC	559.239	655.871	1.41221	53.9402	607.555	27.6762	0.0455535	depleted
KRAS CDE Pos	KIF17	CGTCTACGACTCCATCCAGG	192.669	156.906	0	33.4643	174.787	16.7321	0.0957285		KRAS CDE Neutral	INS	GGCTGGGTCAGGTCCCCAGA	160.701	121.342	0	12.8429	141.022	6.42146	0.0455353	depleted
KRAS CDE Neg	ARHGEF11	AGATCATGCCCACGTCCCTG	208.614	467.715	0.430176	63.8301	338.164	32.1301	0.0950133		KRAS CDE Pos	SLC39A9	TCTGAGAAATTAACAGCCAA	188.556	219.038	1.41221	17.1239	203.797	9.26805	0.0454769	depleted
KRAS CDE Pos	FOXG1	GCCGCGCCACTACGACGACC	338.167	166.666	0.860351	47.0979	252.416	23.9791	0.0949983		KRAS CDE Neutral	TMOD3	GTTAAGAGATAATGAAACCC	154.273	126.943	0.706104	11.9867	140.608	6.34641	0.0451356	depleted
KRAS CDE Neutral	COMMD7	GAGCAGCGAATTGGAGAAAG	160.779	132.882	0	27.8869	146.831	13.9435	0.0949629		KRAS CDE Neutral	CASP6	AGTACAAAATGGACCACAGG	130.703	193.525	0	14.5553	162.114	7.27765	0.0448921	depleted
KRAS CDE Neg	KBTBD3	AATCAACGAAGCACATGTAA	152.142	208.707	12.4751	21.6898	180.425	17.0825	0.0946791		NTC	NTC	CCTTAGACCGGGTGTACCTC	1131.33	204.726	0	59.9336	668.03	29.9668	0.0448585	depleted
KRAS CDE Neutral	GPR139	GTTTGCCAACCCTATCCATG	322.222	286.785	0.430176	57.0132	304.504	28.7217	0.094323		KRAS CDE Neutral	ZBBX	ACAGGGACCCCTCACATGTG	62.1376	128.81	0	8.56194	95.4736	4.28097	0.0448393	depleted
KRAS CDE Neutral	SAR1B	GTAAATCCAATCAAATATGA	259.771	310.058	0	53.295	284.915	26.6475	0.093528		NTC	NTC	TCGTACCGCACGTGTAAGCC	47.1389	105.786	0	6.84956	76.4622	3.42478	0.0447904	depleted
KRAS CDE Neutral	C1orf87	TAAACACTTTCAATACCTCG	413.242	459.457	36.9951	44.6191	436.349	40.8071	0.0935193		KRAS CDE Neg	ASPSCR1	AGACTTCGTGAGGAGCCACC	81.4217	148.1	0	10.2743	114.761	5.13717	0.0447641	depleted
KRAS CDE Neutral	SDHC	AAAGTTCCCAGGGAGTAACA	263.093	182.431	0	41.5205	222.762	20.7603	0.0931948		KRAS CDE Pos	SCRG1	TCACAACTGTCACAACCTTC	224.981	234.595	0	20.5487	229.788	10.2743	0.0447122	depleted
KRAS CDE Pos	OBSCN	CTGCTGTCTTGTCCTTGGGG	399.954	265.013	17.207	44.6191	332.484	30.913	0.0929761		KRAS CDE Neg	PSMB10	GAGCAGGTACCAGGGCCACG	32.1401	82.7617	0	5.13717	57.4509	2.56858	0.0447092	depleted
KRAS CDE Neg	OR2T5	ATCGTCTGAAGAGTCCCATG	603.918	839.334	86.0351	47.7176	721.626	66.8764	0.0926746		KRAS CDE Neg	CPEB1	TCTGCGCAAGAATCTTCCCG	173.557	289.355	3.53052	17.1239	231.456	10.3272	0.0446185	depleted
KRAS CDE Pos	FN1	TGTAGTTCACACCATTGTCA	704.238	506.754	46.0288	65.6892	605.496	55.859	0.0922533		KRAS CDE Neutral	MOK	GCTCACCTGTCTGTGCCCCA	171.414	135.654	0	13.6991	153.534	6.84956	0.0446125	depleted
KRAS CDE Pos	CDCA4	GGATGGGACGTGGCGCACAG	221.237	75.0746	0.430176	26.6475	148.156	13.5388	0.0913824		KRAS CDE Neg	MGAT2	GGAGAAGACAACTAGACCCA	38.5682	143.744	2.11831	5.99336	91.1561	4.05584	0.0444933	depleted
KRAS CDE Neutral	HORMAD1	AGTCTTTGGTGTTAGTGAAG	486.323	417.415	67.9677	14.2533	451.869	41.1105	0.0909789		KRAS CDE Pos	C6orf223	AGGCCCTTCAGCAACGGAGT	276.405	147.478	0	18.8363	211.941	9.41814	0.0444375	depleted
KRAS CDE Neg	NARS	AATGTTGGTGAGATTGTGGG	344.147	349.848	52.4814	10.5351	346.997	31.5082	0.0908026		KRAS CDE Neg	P2RY12	CAGAGACTACAAAATCACCC	257.121	453.011	0.706104	30.823	355.066	15.7646	0.0443989	depleted
KRAS CDE Neg	ABCD4	GAGACTCCTTCAGACCCAGA	152.806	146.396	0.430176	26.6475	149.601	13.5388	0.0904996		KRAS CDE Neutral	TATDN1	ACTCCTTTAAGTAAAGATCA	254.979	297.444	9.88546	14.5553	276.211	12.2204	0.0442429	depleted
KRAS CDE Neg	LTA4H	ACTAAAGCAATCAGGTAGCA	316.243	533.03	0	76.8439	424.636	38.422	0.0904821		KRAS CDE Neg	FAM162A	CTTTACACAAACCTACGGAT	516.385	225.883	2.82442	29.9668	371.134	16.3956	0.044177	depleted
KRAS CDE Neg	ZMYND15	ACAGTCACTGAAGATCCACG	336.839	328.076	1.7207	58.2527	332.457	29.9867	0.0901971		KRAS CDE Pos	NAGK	CGCGGGGAGGATCCTGATCG	134.989	142.499	2.82442	9.41814	138.744	6.12128	0.0441192	depleted
KRAS CDE Neutral	KIF3B	GGATGAAGATGAGATACAGG	570.699	352.851	2.15088	80.5622	461.775	41.3565	0.08956		KRAS CDE Pos	TMEM246	AGAGCCCGATGTGTTTCACG	188.556	192.903	1.41221	15.4115	190.729	8.41185	0.0441036	depleted
KRAS CDE Neg	MGAT2	TGACTCACCCACAATGACAG	560.069	477.475	0.860351	91.717	518.772	46.2887	0.0892274		KRAS CDE Neutral	ODF2L	ATCTGCAGAGTATACAGCAT	139.274	229.617	0	16.2677	184.445	8.13385	0.0440989	depleted
KRAS CDE Pos	EREG	TGGACAGTGCATCTATCTGG	150.149	204.203	30.9726	0.619709	177.176	15.7962	0.0891553		KRAS CDE Neg	POFUT1	GGTGGCATACTGCTTTGAGG	38.5682	75.2945	0.706104	4.28097	56.9313	2.49354	0.0437991	depleted
KRAS CDE Neg	TTBK1	TGGGCCGCCACGACGACCTG	249.141	221.47	0.430176	41.5205	235.306	20.9753	0.0891409		KRAS CDE Pos	FN1	ACTTGTTATGGAGGAAGCCG	379.254	207.838	0	25.6858	293.546	12.8429	0.043751	depleted
KRAS CDE Neutral	ELOVL3	CCAGGACCAGAATTTGACTG	284.353	144.894	37.4253	0.619709	214.623	19.0225	0.0886319		KRAS CDE Neg	GOLGA6B	TACAGCAGACCATAAAGGAG	137.131	117.609	0	11.1305	127.37	5.56526	0.0436937	depleted
KRAS CDE Pos	CDKN1C	GCTGGAAGTCGTAATCCCAG	176.724	264.263	0.430176	38.422	220.493	19.4261	0.0881028		KRAS CDE Pos	DEF6	ACTCTTCTCCACGTCCAGCG	89.9924	203.482	0.706104	11.9867	146.737	6.34641	0.0432502	depleted
KRAS CDE Neg	PRH2	GTTTCAACTCACACAGATGG	294.983	411.409	53.3418	8.67593	353.196	31.0089	0.087795		KRAS CDE Neg	LTA4H	ACTAAAGCAATCAGGTAGCA	177.842	200.993	0	16.2677	189.417	8.13385	0.0429414	depleted
KRAS CDE Neg	LTA4H	AAGGAAGAATGAAGTTTACC	214.593	248.497	3.4414	37.1826	231.545	20.312	0.0877236		KRAS CDE Pos	CNR2	GGTAGGAGACTAGTGCTGAG	2.14268	117.609	0	5.13717	59.8757	2.56858	0.0428986	depleted
KRAS CDE Neg	CPD	GATTTCCGGACAATGGCCAT	523.528	360.358	0	77.4637	441.943	38.7318	0.0876398		KRAS CDE Neutral	PCDH9	AAGGGAGTTCCTGAATCACG	287.119	52.2705	0	14.5553	169.695	7.27765	0.0428868	depleted
KRAS CDE Neutral	ZNF133	TCAGCAGCCTCCACTCATCC	159.45	270.269	0.430176	37.1826	214.859	18.8064	0.0875287		KRAS CDE Neg	DIRAS2	CAAGCTCAACCATAACGTGA	162.843	161.79	7.06104	6.84956	162.317	6.9553	0.0428502	depleted
KRAS CDE Neg	NOS1AP	ATGGTGCCAGCAATATCTTC	251.798	475.222	61.5151	1.85913	363.51	31.6871	0.0871698		KRAS CDE Neutral	IMPACT	GGATTTATCAAATAGCCTTG	297.832	251.396	2.11831	21.4049	274.614	11.7616	0.0428295	depleted
KRAS CDE Neutral	PRDM11	AGCCATCTATGGACTTATAG	118.923	332.581	38.7158	0.619709	225.752	19.6678	0.0871211		KRAS CDE Neg	PKIG	TGACATCCAGGGAGACTCAG	512.1	586.799	1.41221	45.3783	549.449	23.3953	0.0425795	depleted
KRAS CDE Neg	SLC5A8	CATCTACTACGCCTTCGCTG	120.252	65.3149	0	16.1124	92.7835	8.05622	0.0868282		KRAS CDE Pos	DBNDD2	GGCTACTGGTACTTCCAAGG	124.275	77.1613	0	8.56194	100.718	4.28097	0.0425044	depleted
KRAS CDE Neutral	EDN1	AAGGAGCTCCAGAAACAGGT	257.113	121.621	0	32.8446	189.367	16.4223	0.086722		KRAS CDE Pos	ROBO3	AGCATCCCCACGCTGCACCG	398.538	488.481	0	37.6726	443.509	18.8363	0.042471	depleted
KRAS CDE Neg	XYLT1	CCATTCTCCAGGGGGTGACG	322.887	341.59	0.430176	57.0132	332.238	28.7217	0.0864492		KRAS CDE Pos	TAS2R9	TCATGCTTGCGATTCTTCTG	175.699	248.285	0	17.9801	211.992	8.99004	0.0424074	depleted
KRAS CDE Neg	CDV3	TTTGCATTGCCTGAACCCTG	433.837	448.196	0.860351	74.9848	441.016	37.9226	0.085989		KRAS CDE Neutral	ZCCHC6	TTCAGCTGCAAATACCTGTA	389.967	553.196	13.416	26.542	471.582	19.979	0.0423659	depleted
KRAS CDE Neutral	ANGL5	TGAATTATGTATAAACCACT	211.272	331.83	46.0288	0.619709	271.551	23.3243	0.0858928		KRAS CDE Pos	ATXN7L2	TTGGATGATGAAGGCCCCTG	49.2816	194.148	0	10.2743	121.715	5.13717	0.0422067	depleted
KRAS CDE Neutral	RBCK1	GACCTCACGCTGCAGCCGCG	64.4445	160.66	0	19.211	112.552	9.60549	0.0853427		KRAS CDE Neg	ZBTB2	GTACATTAGTGACCACAGCC	25.7121	96.4516	0	5.13717	61.0818	2.56858	0.0420515	depleted
KRAS CDE Neg	CDC40	TTTGGAGACAAAGTCACTGC	108.293	45.0448	0	13.0139	76.669	6.50695	0.0848706		KRAS CDE Neg	ITPR2	GCTGCGAGTGTCTCAGGACG	265.692	203.482	0	19.6925	234.587	9.84624	0.0419727	depleted
KRAS CDE Neutral	ATP5L2	TACCAAAATGCGGCCAATCG	99.6564	288.287	0	32.8446	193.971	16.4223	0.0846635		KRAS CDE Pos	CNR2	GAGCACAGCCACGTTCTCCA	158.558	270.064	0	17.9801	214.311	8.99004	0.0419485	depleted
NTC	NTC	TGCCGACGCGACGCAGCGTA	112.944	268.767	32.2632	0	190.856	16.1316	0.0845225		KRAS CDE Neutral	CDH12	TTATCCATCTGCCAGGACAA	242.122	203.482	0.706104	17.9801	222.802	9.34309	0.0419345	depleted
KRAS CDE Pos	PHC2	TTGGTATCCTTGGTAAGTGG	243.826	304.803	0.430176	45.8585	274.314	23.1443	0.0843715		KRAS CDE Neutral	SMOX	GAATGACCCTGACGACCCAG	130.703	227.75	2.11831	12.8429	179.227	7.48061	0.0417383	depleted
KRAS CDE Neutral	WFDC12	CAAGAACGAGAGACACCATG	642.451	764.26	28.3916	89.8578	703.356	59.1247	0.0840609		KRAS CDE Pos	LBH	GATCGGCCTCAGCCCCCGCA	145.702	134.41	1.41221	10.2743	140.056	5.84327	0.041721	depleted
KRAS CDE Pos	OBSCN	GATCATCCCCTACCACCCCA	396.632	221.47	0.430176	51.4359	309.051	25.933	0.0839117		KRAS CDE Pos	TWIST1	GATTCAGACCCTCAAGCTGG	683.514	351.582	6.35494	36.8164	517.548	21.5856	0.0417076	depleted
KRAS CDE Pos	ALDH8A1	CTGAAGTTCTGCACAGACCG	250.47	279.278	0.430176	43.9994	264.874	22.2148	0.0838693		KRAS CDE Neutral	IAPP	GATCATCAGAAGACCCCCCA	415.679	528.928	0	39.3849	472.304	19.6925	0.0416945	depleted
KRAS CDE Neg	ZMYND15	AAATCCTGCAGACAGAGAGG	55.8076	47.297	8.60351	0	51.5523	4.30176	0.0834445		KRAS CDE Neutral	C1orf87	TTAGTATACACACCTCAGGT	186.413	142.499	0	13.6991	164.456	6.84956	0.0416497	depleted
KRAS CDE Neutral	PARP8	CCTCTGACTTAACAGCTGCA	285.017	243.993	8.17334	35.9431	264.505	22.0582	0.0833944		NTC	NTC	CGAGGATGTACATACGTAAA	113.562	277.532	0	16.2677	195.547	8.13385	0.0415954	depleted
KRAS CDE Neg	P2RY12	CAACCCCAAAAATCTCTTGG	76.4032	45.7955	0.860351	9.29564	61.0994	5.07799	0.0831104		KRAS CDE Neg	SLC10A5	GTAGCTTGAACTTACAAGGA	374.968	50.4037	1.41221	16.2677	212.686	8.83995	0.0415634	depleted
KRAS CDE Neg	BCAR1	CCGCAAGGGTGACATCATGA	297.64	274.773	0.430176	47.0979	286.207	23.764	0.083031		KRAS CDE Pos	CCNG2	AATCCGGATCACATCATGAG	98.5631	162.412	1.41221	9.41814	130.488	5.41517	0.0414995	depleted
KRAS CDE Neg	HSP90B1	GCAGAGGCCCAGCACCCACA	151.478	104.354	21.0786	0	127.916	10.5393	0.0823926		KRAS CDE Pos	CCDC3	GCAGTACCACGCCGGCCAGG	167.129	204.726	0	15.4115	185.928	7.70575	0.0414449	depleted
KRAS CDE Pos	NKD2	AGAGAGGGCAGCAAACCGCG	387.996	228.978	35.2744	15.4927	308.487	25.3836	0.0822842		KRAS CDE Neutral	IKZF3	AATGAAGATGAAGACATAGG	321.401	252.641	1.41221	22.2611	287.021	11.8366	0.0412396	depleted
KRAS CDE Neg	YWHAZ	CGGCAACCTCAGCCAAGTAA	256.449	419.667	0.430176	55.1541	338.058	27.7921	0.0822112		KRAS CDE Neutral	DHX57	CCTCCTCCAAACAAGACCAG	83.5644	141.255	0.706104	8.56194	112.41	4.63402	0.0412244	depleted
KRAS CDE Neg	DUSP11	ACTATCTCCCAGTTGGACAG	471.043	312.31	64.0962	0	391.676	32.0481	0.0818228		KRAS CDE Neg	SARNP	TAGGGCAGCAGAGAAGAAAG	17.1414	0	0.706104	0	8.57071	0.353052	0.0411929	depleted
KRAS CDE Pos	ANKRD45	ACTGACACAGAAAAGGGATC	413.242	334.833	9.03369	52.0556	374.037	30.5446	0.081662		KRAS CDE Pos	TMEM246	GCAAAGCTTGAAAGAGGGTG	248.55	437.455	0	28.2544	343.003	14.1272	0.0411869	depleted
KRAS CDE Pos	GOLGA8O	GACGAAACAGAAGACCCGAA	39.8626	99.0985	2.58105	8.67593	69.4805	5.62849	0.0810082		KRAS CDE Pos	CREM	GAACTGTCCTCTGATGTGCC	188.556	102.674	0	11.9867	145.615	5.99336	0.041159	depleted
KRAS CDE Pos	FEZ2	GCTCCGGGCGGCGATGGCGG	167.423	284.533	0	36.5628	225.978	18.2814	0.0808992		KRAS CDE Pos	ASB4	GCTTTGCCCCACGATCACAG	130.703	161.167	0	11.9867	145.935	5.99336	0.0410686	depleted
KRAS CDE Pos	KIF17	GGACTGTAACTACAGCAACC	182.039	95.3448	22.3691	0	138.692	11.1846	0.0806433		KRAS CDE Neg	REV3L	CAATGTATGAAGCTTCTGGA	314.973	60.36	0	15.4115	187.667	7.70575	0.0410608	depleted
KRAS CDE Neutral	BASP1	AGCGCCTAGTTCCACACCCA	401.947	641.137	57.6435	25.4081	521.542	41.5258	0.0796212		KRAS CDE Pos	LRRN1	AAACGTGGATATCGGCACGA	364.255	280.021	1.41221	24.8296	322.138	13.1209	0.0407308	depleted
KRAS CDE Pos	GPR141	CTGTCAGCAGAAAAACGCTG	136.861	221.47	0	28.5066	179.166	14.2533	0.0795538		KRAS CDE Neg	UPK1A	TGAGGACCATGGACCGGCGG	242.122	347.226	0	23.9734	294.674	11.9867	0.0406779	depleted
KRAS CDE Neutral	IMPACT	GAATGTGAAGAATGTCATGG	160.115	284.533	0	35.3234	222.324	17.6617	0.0794414		KRAS CDE Pos	NAGK	TGATTAAGTAGCTTTCACTC	304.26	243.307	0	22.2611	273.783	11.1305	0.0406545	depleted
KRAS CDE Pos	CDCA4	TGCACGGCACAGGATCTCCG	103.643	75.8254	0	14.2533	89.734	7.12666	0.0794198		KRAS CDE Pos	PPID	AGAAGACTCGAGGGTTACTG	235.694	118.853	0.706104	13.6991	177.274	7.20261	0.0406298	depleted
KRAS CDE Pos	MARVELD3	GGAATATTACCAGTCAGAGG	94.3414	162.912	0.430176	19.8307	128.627	10.1304	0.0787584		KRAS CDE Pos	NR1H3	CGATCGCAGAGGTCTTCAGC	239.98	182.947	0	17.1239	211.463	8.56194	0.040489	depleted
KRAS CDE Neutral	DDX52	CCTGGCCTGCACATCCCACA	407.927	317.566	56.7832	0	362.746	28.3916	0.0782685		KRAS CDE Neg	POFUT1	GTACTCACGTTGGTGAAAGG	224.981	388.295	0	24.8296	306.638	12.4148	0.0404869	depleted
KRAS CDE Neutral	MOK	GCCCTTCTCTCGGATCTCCA	552.761	605.101	1.29053	89.2381	578.931	45.2643	0.078186		KRAS CDE Neg	SLC5A8	TGTTATTTATGCCCCTGCCC	246.408	409.453	0	26.542	327.93	13.271	0.040469	depleted
KRAS CDE Pos	LEPROT	CTGCATTGCCTGCCAACACA	202.635	130.63	0	26.0278	166.632	13.0139	0.0780995		KRAS CDE Neutral	NLGN1	AAGTTATTAGTAAACCACAC	141.417	278.154	0.706104	16.2677	209.785	8.4869	0.0404552	depleted
KRAS CDE Neg	C10orf99	CCCAACTCAACAAACCTGAA	207.95	243.242	33.9839	1.23942	225.596	17.6116	0.0780673		KRAS CDE Neg	ARNTL2	CTGTTGGACTCGAATCATCA	175.699	265.086	0.706104	17.1239	220.393	8.915	0.0404505	depleted
KRAS CDE Neutral	ESF1	CTTCAATTACAACAAGATTG	71.0882	101.351	0.430176	13.0139	86.2195	6.72203	0.0779642		KRAS CDE Neg	NOS1AP	GTTACACCTGAAGATATTGC	186.413	47.2924	0	9.41814	116.853	4.70907	0.0402992	depleted
KRAS CDE Neutral	RABL2A	TGATGCAGGCATGGGCCTTG	312.257	281.53	9.89404	35.9431	296.893	22.9186	0.0771947		KRAS CDE Neutral	OGFR	TGCGAGAACCAGGAGTGAAC	6.42803	36.0916	0	1.71239	21.2598	0.856194	0.0402729	depleted
KRAS CDE Neutral	DEFA6	GGCTGAGCCACTCCAAGCTG	260.435	225.224	36.1348	1.23942	242.83	18.6871	0.0769555		KRAS CDE Neutral	NFKBIB	AGTGACGTAGCCGAAGACGA	239.98	54.1373	0.706104	11.1305	147.059	5.91832	0.0402446	depleted
KRAS CDE Neutral	SLC27A3	CTCCAGTACGATCATGGAAG	629.164	321.319	3.01123	70.0271	475.242	36.5192	0.0768434		KRAS CDE Neg	SCN5A	GGGTCCAGCCAGGTACCAGG	115.705	33.6025	0	5.99336	74.6535	2.99668	0.0401412	depleted
KRAS CDE Neutral	PCDHA6	GATGGCCTCCAAAGACCGCG	694.273	387.385	0	83.041	540.829	41.5205	0.076772		KRAS CDE Neutral	GNPNAT1	GCCTTCTCCAGGATGTGTTG	544.24	566.264	0	44.5221	555.252	22.2611	0.0400918	depleted
KRAS CDE Pos	PBXIP1	AGTGGGGGTAGAGGCCCACA	135.533	155.404	0	22.3095	145.469	11.1548	0.0766816		KRAS CDE Neutral	NKX2-5	GCGGGCAGAGAGCTCTCCGG	21.4268	0	0	0.856194	10.7134	0.428097	0.0399591	depleted
KRAS CDE Pos	RAPGEF3	CATGCTCCACACTGACCCTG	472.371	385.133	64.9565	0.619709	428.752	32.7881	0.0764734		KRAS CDE Neutral	KLB	AAACCGGTCGGAAAACACGA	199.269	140.01	0.706104	12.8429	169.64	6.77451	0.0399347	depleted
NTC	NTC	TTATACCGTCACGAGTGCCC	215.258	176.425	29.2519	0.619709	195.842	14.9358	0.0762648		KRAS CDE Pos	NAT16	ACAGCACCCGGGGGTCAAGG	164.986	113.875	0	11.1305	139.431	5.56526	0.0399142	depleted
KRAS CDE Neutral	RFWD3	CTGTTGCTGGTGTCTTGATG	396.632	284.533	37.4253	14.2533	340.583	25.8393	0.0758679		KRAS CDE Neutral	ITGBL1	GGTCGCTGTGTTTGTGAGAG	203.554	141.255	0	13.6991	172.405	6.84956	0.0397295	depleted
KRAS CDE Neg	LTA4H	GAAATATCTCATAGCTGGAC	471.043	171.921	0.430176	48.3373	321.482	24.3837	0.075848		KRAS CDE Pos	CBWD1	CGTACTCGCCCAACACCACC	276.405	350.959	0	24.8296	313.682	12.4148	0.0395777	depleted
KRAS CDE Neutral	AKAP13	TTGGTGAGTGGAAATCTGGG	155.464	168.918	0.430176	24.1687	162.191	12.2994	0.075833		KRAS CDE Neg	ID1	CCGAGTTCAGCTCCAACTGA	402.823	609.201	9.17935	30.823	506.012	20.0012	0.0395271	depleted
KRAS CDE Pos	GPR158	ATTGATACTGCTGTTCAGGT	152.806	80.3298	17.6372	0	116.568	8.8186	0.0756519		KRAS CDE Neg	SLC16A12	GCTGTCCAGTGACTTCCTGA	175.699	190.414	0.706104	13.6991	183.057	7.20261	0.0393463	depleted
KRAS CDE Neutral	SDHD	TTACTGCAACCTCCGCCTTT	669.691	720.716	104.102	0.619709	695.204	52.3611	0.0753176		KRAS CDE Neg	BICD1	GAGAGCAAAAGAACAACCTG	306.403	146.855	0.706104	17.1239	226.629	8.915	0.0393374	depleted
KRAS CDE Neutral	GOLGB1	ACTGGTATCGCAGAGCTGAA	411.249	344.593	0.430176	56.3935	377.921	28.4119	0.0751794		KRAS CDE Pos	CBWD1	ATGTACAAACTTGATCTTCT	0	36.0916	1.41221	0	18.0458	0.706104	0.0391285	depleted
KRAS CDE Neutral	PCDH18	GCTTCTTTCAATGCTTCACC	364.078	405.403	57.2134	0.619709	384.74	28.9165	0.0751585		KRAS CDE Pos	LRP10	GTAGGAAAGTCTTCTACAGG	212.125	204.726	0	16.2677	208.426	8.13385	0.0390252	depleted
KRAS CDE Neg	TP53I3	ATCCCTCTGGGATAGGCATG	345.475	546.543	51.6211	14.873	446.009	33.247	0.0745434		KRAS CDE Pos	HLA-DQB1	TCGGCATCAGGCCGCCCCTG	139.274	387.673	0	20.5487	263.474	10.2743	0.0389957	depleted
KRAS CDE Neg	SLC5A8	CCAGTTTGTAGAACACCGGG	290.332	153.903	0	32.8446	222.118	16.4223	0.0739351		KRAS CDE Pos	TCF12	CCAATGTCCAGCTTTCATCG	544.24	688.229	1.41221	46.2345	616.234	23.8234	0.0386596	depleted
KRAS CDE Neutral	INS	CCACAATGCCACGCTTCTGC	182.703	204.203	0	28.5066	193.453	14.2533	0.0736784		KRAS CDE Neutral	ACOX3	GGCCTTCGTGGAGCTCACGG	173.557	334.158	0.706104	18.8363	253.857	9.77119	0.0384909	depleted
KRAS CDE Neutral	SLC6A6	AGCACCAGGAGCATGGCGAA	109.622	92.3418	0	14.873	100.982	7.43651	0.073642		KRAS CDE Pos	YWHAQ	CCGAGGACTCACCAGCACCG	340.686	195.392	0	20.5487	268.039	10.2743	0.0383315	depleted
KRAS CDE Pos	CBWD1	CGTACTCGCCCAACACCACC	346.804	349.848	0.430176	50.8162	348.326	25.6232	0.0735609		KRAS CDE Neg	GLMN	ACTGGATTATGGACAGAACT	0	22.4017	0	0.856194	11.2008	0.428097	0.0382201	depleted
KRAS CDE Pos	MARCH5	GTAGATCCTCTGCACCTGCA	403.941	254.503	0.430176	47.7176	329.222	24.0739	0.0731236		KRAS CDE Neg	MAP3K2	CTCTTACTGAGAATGTGACT	278.548	125.076	0	15.4115	201.812	7.70575	0.0381828	depleted
KRAS CDE Neg	SNRPG	TATCATCATGTTAGAAGCCT	463.07	382.881	0.430176	61.3512	422.975	30.8907	0.0730319		KRAS CDE Pos	NAT16	GGTCAAGAGACAGCACCCGG	179.985	134.41	0	11.9867	157.197	5.99336	0.0381263	depleted
KRAS CDE Neg	DNAJC22	AAAGGCTAATCAGTGCCACA	546.117	327.325	0.430176	63.2103	436.721	31.8203	0.0728617		KRAS CDE Neutral	DUOXA2	CAGTGCGTTCGCGTACTCCG	66.423	164.901	2.82442	5.99336	115.662	4.40889	0.0381187	depleted
KRAS CDE Neutral	NUDT5	GGATGATTGCATATTCAACA	577.343	559.306	81.3032	0.619709	568.324	40.9615	0.0720741		KRAS CDE Neutral	SENP8	CAACAAAACAGCTATGACTG	239.98	278.776	0	19.6925	259.378	9.84624	0.037961	depleted
KRAS CDE Neutral	KCTD1	ATCATCAGGAATGAGGAGTT	275.716	188.437	0.430176	32.8446	232.077	16.6374	0.0716892		NTC	NTC	AAGGCCTTAACACGTCGACC	1358.46	181.702	0	58.2212	770.08	29.1106	0.0378021	depleted
KRAS CDE Pos	PXDNL	GTGTTCATGGGGAAACAAGG	483.666	403.151	0.860351	62.5906	443.408	31.7255	0.0715492		KRAS CDE Neutral	TEX29	TAGTCACAAATGTCATACAG	109.277	186.058	0	11.1305	147.667	5.56526	0.0376878	depleted
KRAS CDE Neg	TESK1	TGAAGCCTCGATCTTCCCGT	220.573	160.66	0	27.2672	190.616	13.6336	0.0715238		KRAS CDE Neutral	CROT	GTGAGAAGACAGAGATGCAG	70.7083	88.3621	0	5.99336	79.5352	2.99668	0.0376774	depleted
KRAS CDE Neg	OR5T2	GTTAACATCCCCTTGAGTCA	320.894	319.818	0.430176	45.2388	320.356	22.8345	0.0712785		KRAS CDE Pos	MCL1	GCCATCCCCAACCCGTCGTA	128.561	260.108	0	14.5553	194.334	7.27765	0.0374491	depleted
KRAS CDE Neg	HSD17B4	AAACTCTACAAACTGAGATG	222.566	212.461	0	30.9855	217.514	15.4927	0.0712265		KRAS CDE Pos	ZNF408	AGGGCGAGGGAGTAAAGCCA	224.981	151.211	6.35494	7.70575	188.096	7.03034	0.0373763	depleted
KRAS CDE Neg	OLFM4	GCCAGACACCACCTTTCCCG	395.304	372.37	13.7656	40.9008	383.837	27.3332	0.0712105		KRAS CDE Pos	CR1	GCTGCAATCCTGGAAGCGGA	623.519	599.867	2.82442	42.8097	611.693	22.8171	0.0373015	depleted
KRAS CDE Pos	TARBP1	CCAGCAGCTTCTCCTCTACG	229.874	251.5	33.5537	0.619709	240.687	17.0867	0.0709914		KRAS CDE Pos	ZIC1	TGTGGAGGGAGACACGATGG	175.699	100.185	0	10.2743	137.942	5.13717	0.0372414	depleted
KRAS CDE Pos	HLA-DRB5	TTGCCATGTAGGAACCTCCA	512.898	276.275	55.9228	0	394.586	27.9614	0.0708626		KRAS CDE Pos	NPTXR	TGATGCAGATGACGGCACCG	0	23.0239	0	0.856194	11.512	0.428097	0.0371872	depleted
KRAS CDE Neutral	ITGBL1	ATCTTCGCTTGCTTTCCCAG	297.64	295.043	40.0063	1.85913	296.342	20.9327	0.0706371		KRAS CDE Neg	SLC5A8	GTGGTCTTAAAGCAGTTATC	0	23.0239	0	0.856194	11.512	0.428097	0.0371872	depleted
KRAS CDE Neg	FAR2	AACTTAACGTCACTGCCACC	205.292	235.734	0	30.9855	220.513	15.4927	0.0702576		KRAS CDE Pos	CCSER2	AATCCTGAACCATGTGCCGA	66.423	182.947	0.706104	8.56194	124.685	4.63402	0.0371659	depleted
KRAS CDE Pos	LMO4	CTGCGAGTGAACTCGTCATG	273.058	248.497	16.7768	19.8307	260.778	18.3038	0.0701892		KRAS CDE Pos	RFX4	AATCCAGGTAATGCATATAG	269.977	233.351	0.706104	17.9801	251.664	9.34309	0.0371253	depleted
KRAS CDE Pos	ZIC1	GGATTCGTAGCCAGAGCTGG	366.735	211.71	40.4365	0	289.223	20.2183	0.0699054		KRAS CDE Neutral	PCDH9	CTCCTGAATGTGGAAACCCG	214.268	200.993	0	15.4115	207.63	7.70575	0.0371129	depleted
KRAS CDE Pos	INPP5F	CATCTCTGCAATGCACTGAA	211.936	204.954	0	29.1263	208.445	14.5632	0.0698658		KRAS CDE Neg	OR5C1	CACCGTGATAGCTAACACCG	169.271	224.639	0	14.5553	196.955	7.27765	0.0369508	depleted
KRAS CDE Neutral	MTFR2	GGTCTTCGACAAGGTTCCAG	263.757	360.358	0	43.3796	312.058	21.6898	0.0695058		KRAS CDE Pos	ZBTB4	GCATGAAGTGTGGCACACGG	40.7109	24.8907	0.706104	1.71239	32.8008	1.20925	0.0368664	depleted
KRAS CDE Neutral	SLC35G3	TGTCAGGAGTTCCCAGAAGG	23.2532	58.5582	2.58105	3.09855	40.9057	2.8398	0.0694231		KRAS CDE Neutral	UGT2B4	CCAAATGTTGAGTTCGTTGG	79.279	333.536	1.41221	13.6991	206.407	7.55566	0.0366056	depleted
KRAS CDE Pos	MRVI1	ACAGAAGAGTGAGAGTCCTG	204.628	315.313	0	35.9431	259.971	17.9716	0.0691292		KRAS CDE Neutral	TAS2R19	CCAGTCAATGACATTTACTA	160.701	163.034	0.706104	11.1305	161.868	5.91832	0.0365627	depleted
KRAS CDE Neg	SARNP	GCTCGTGGTTTGGAGACCAA	357.434	330.328	28.3916	18.5913	343.881	23.4914	0.0683126		KRAS CDE Pos	DEGS1	CAGGATCTCCCGGCGCCGGT	85.7071	85.2507	2.82442	3.42478	85.4789	3.1246	0.036554	depleted
KRAS CDE Neutral	AARD	CCAGTAAAGTTCTAGCCAGC	231.867	246.996	31.4028	1.23942	239.431	16.3211	0.0681662		KRAS CDE Neg	C10orf99	CTGCCAAGGCCTGGTCAGGC	42.8535	0	0.706104	0.856194	21.4268	0.781149	0.0364567	depleted
KRAS CDE Neutral	ELOVL3	GGGACTGTGCTACTTACCGG	201.97	172.672	0	25.4081	187.321	12.704	0.0678196		KRAS CDE Neutral	SRMS	GGAGCTGAGTGTCCGCCGCG	269.977	271.931	0	19.6925	270.954	9.84624	0.0363391	depleted
KRAS CDE Neg	OR5C1	CACCGTGATAGCTAACACCG	285.682	322.821	0.860351	39.6614	304.251	20.2609	0.0665926		KRAS CDE Neutral	SLC22A8	GGACGCCGAGGGCAAGGCCG	134.989	140.01	1.41221	8.56194	137.499	4.98708	0.0362698	depleted
KRAS CDE Pos	PAPOLG	AGGCATAGATTCTCCTCCAA	391.982	367.866	4.73193	45.8585	379.924	25.2952	0.0665797		KRAS CDE Pos	PRPF38A	ATCACCGTAGTCACAGACAC	304.26	286.243	0	21.4049	295.252	10.7024	0.0362485	depleted
KRAS CDE Pos	TCF3	GAGTAAGATAGAAGACCACC	206.621	259.758	11.1846	19.8307	233.19	15.5076	0.0665023		KRAS CDE Neg	SPACA7	CAGCAGGAGGACAAAGCAGA	104.991	202.859	0	11.1305	153.925	5.56526	0.0361556	depleted
KRAS CDE Pos	SLC35B4	TCTTTGAAGCTGATTTGGGA	232.532	299.548	0	35.3234	266.04	17.6617	0.0663875		KRAS CDE Neutral	SENP8	GGTAGACCAATAAACTCCAG	124.275	232.106	0	12.8429	178.191	6.42146	0.036037	depleted
KRAS CDE Neutral	FAM105A	GTTGGCAGTTTCATTTCTGG	717.526	740.236	1.29053	95.4352	728.881	48.3629	0.0663522		KRAS CDE Pos	FRMD3	CAATACCTGACTCCAAAAGG	299.975	334.78	13.416	9.41814	317.378	11.4171	0.0359731	depleted
KRAS CDE Neutral	ACOX3	GACCACCGTGAGCTCCACGA	258.442	313.812	0	37.8023	286.127	18.9011	0.0660585		NTC	NTC	GTATCCTCGCAATCGTTAGG	437.106	474.791	3.53052	29.1106	455.948	16.3206	0.0357948	depleted
KRAS CDE Pos	FRMD3	ACGAAGCCTCCAATTGCACA	433.173	337.085	1.7207	48.957	385.129	25.3389	0.0657932		KRAS CDE Neg	RAP1B	AGATGAAAGAGTTGTAGGGA	355.684	314.245	0	23.9734	334.965	11.9867	0.035785	depleted
KRAS CDE Neg	RNF103	TAGTGCAGAGAAGAAAGCTG	109.622	168.167	0	17.9716	138.895	8.98578	0.064695		KRAS CDE Neutral	HADHA	TGTGGATGTAGCGAAACATG	246.408	499.681	3.53052	23.1172	373.045	13.3239	0.0357166	depleted
KRAS CDE Neg	SPACA7	GATAATGTTGATGCTGTACT	482.337	488.736	0	61.9709	485.536	30.9855	0.063817		KRAS CDE Neutral	UBTD2	ACATAACATTACCACATGGT	227.124	132.543	0	12.8429	179.833	6.42146	0.0357078	depleted
KRAS CDE Neg	PGBD1	GTCTCCTGCAGCATATTCCA	42.5201	32.2821	0.430176	4.33796	37.4011	2.38407	0.0637434		KRAS CDE Pos	PCYOX1	CTACCCACATGTGCATACGG	207.84	151.833	0	12.8429	179.837	6.42146	0.0357072	depleted
KRAS CDE Pos	SLC39A4	CTTCCAGGAGGACGCGAAGG	188.018	135.134	0	20.4504	161.576	10.2252	0.063284		NTC	NTC	CTGATCGGTGCATATCTCGG	229.266	107.03	0	11.9867	168.148	5.99336	0.0356433	depleted
KRAS CDE Neutral	ZNF705A	GGAGAACTCTCTCATTCTGG	345.475	276.275	0.860351	38.422	310.875	19.6412	0.0631802		KRAS CDE Neutral	RBCK1	CCTTCATCAACAAGCCCACG	314.973	256.997	4.94273	15.4115	285.985	10.1771	0.0355862	depleted
KRAS CDE Pos	NKD2	GGCTGACGGTTAGCTTCACA	427.194	236.485	25.8105	16.1124	331.839	20.9615	0.0631676		KRAS CDE Pos	INPP5F	TTCTAACTCTGCCTACTACG	683.514	500.926	19.7709	22.2611	592.22	21.016	0.0354868	depleted
KRAS CDE Neg	BICD1	ACCCAAATAAATTTCCACCA	290.997	348.346	1.29053	39.0417	319.671	20.1661	0.0630838		KRAS CDE Neg	CELSR3	CATTCCATCTTCAGAAAGCG	104.991	260.73	0	12.8429	182.861	6.42146	0.0351167	depleted
KRAS CDE Neg	NCR2	GATCTGAGAGAGGAAGACTC	161.443	291.29	0	28.5066	226.366	14.2533	0.0629657		KRAS CDE Neg	PTPN1	CCTGTAGCAGAGGTAAGCGC	338.543	316.735	0.706104	22.2611	327.639	11.4836	0.0350495	depleted
KRAS CDE Neutral	PCDH9	CCCTCCCCTCCAAAGCCAAG	592.623	481.979	26.6709	40.9008	537.301	33.7858	0.0628807		KRAS CDE Pos	ZNF799	ATGAGTGGAGAAGTCATCAT	317.116	329.802	2.11831	20.5487	323.459	11.3335	0.0350384	depleted
KRAS CDE Neg	KAT8	TTTGCCATCAACTTCGTACA	285.017	352.1	33.1235	6.8168	318.559	19.9702	0.0626891		KRAS CDE Neg	ZFP3	AAGTTCTGAGTTCCCCCTGA	102.848	265.086	0	12.8429	183.967	6.42146	0.0349054	depleted
KRAS CDE Neutral	ACOX3	TCTGCTCCCAGAATTCCCCA	401.947	380.628	0	48.957	391.288	24.4785	0.0625588		KRAS CDE Pos	GMPPA	GCAGAATCTCCTGCATTCCA	128.561	215.305	0	11.9867	171.933	5.99336	0.0348588	depleted
KRAS CDE Neutral	PLCG2	TTTGTAGAAGTGGAGATCTG	313.585	350.598	0	41.5205	332.092	20.7603	0.0625136		KRAS CDE Neutral	TMOD3	ATATCTGGAGAAAGAAGCAT	137.131	207.215	0	11.9867	172.173	5.99336	0.03481	depleted
NTC	NTC	AACCGTACTGCGAGGAGCAT	125.567	111.861	0.430176	14.2533	118.714	7.34174	0.0618439		KRAS CDE Neutral	ELOVL3	GGGACTGTGCTACTTACCGG	184.27	260.108	0	15.4115	222.189	7.70575	0.034681	depleted
NTC	NTC	CCCGCCTGGCGATTCACGGG	209.943	92.3418	0	18.5913	151.142	9.29564	0.0615026		KRAS CDE Neutral	ZNF195	AATGTGACAGCATCTTCAAG	156.415	339.758	0	17.1239	248.087	8.56194	0.0345119	depleted
KRAS CDE Neg	NACA2	GGTAAAACCTGCATCATTGA	363.414	213.212	1.29053	34.084	288.313	17.6873	0.0613475		KRAS CDE Neutral	ZNF133	CAAGCATGTGAAGATCCAGG	218.553	149.344	0.706104	11.9867	183.949	6.34641	0.034501	depleted
KRAS CDE Neutral	TLE4	AGCTCTCATGAAGATGTAGT	274.387	403.901	0	41.5205	339.144	20.7603	0.0612136		KRAS CDE Neutral	ZNF775	GCTCGCACTCGGGGCACGAG	0	24.8907	0	0.856194	12.4454	0.428097	0.0343981	depleted
KRAS CDE Pos	TNFSF9	CCAGGGCCCAAGGCAGTACG	390.653	307.806	21.5088	21.0701	349.229	21.2894	0.0609612		KRAS CDE Pos	CBWD1	TGTATTTCAAACGTGCCGCT	100.706	301.178	0	13.6991	200.942	6.84956	0.0340873	depleted
KRAS CDE Neutral	OTUD4	AAGACCCGAACCAAGCACAT	366.071	297.296	0	40.2811	331.683	20.1406	0.0607222		NTC	NTC	CGAAACCATACCTCCTTCGA	310.688	432.476	2.11831	23.1172	371.582	12.6178	0.0339569	depleted
NTC	NTC	GCGTGCCATGGGAGGCCGTT	67.102	68.3179	3.87158	4.33796	67.7099	4.10477	0.0606229		KRAS CDE Neg	OR1A1	AGAAGATGTCAACCAAGGAG	267.835	111.386	4.23662	8.56194	189.61	6.39928	0.0337497	depleted
KRAS CDE Neutral	ALOX15B	TGTACCCTCCTGCAGCACCA	477.686	607.354	63.666	1.23942	542.52	32.4527	0.0598184		KRAS CDE Neg	MAP2K1	TAAAAGGCCTGACATATCTG	186.413	144.989	0	11.1305	165.701	5.56526	0.0335862	depleted
KRAS CDE Neutral	CABP1	AAGCACCAGTGAGCTGCGAG	24.5819	46.5463	3.01123	1.23942	35.5641	2.12532	0.0597604		KRAS CDE Neg	HSF2	TTATGATGATGATTATCAGT	272.12	355.315	2.11831	18.8363	313.718	10.4773	0.0333972	depleted
KRAS CDE Pos	PRTN3	GTTCCCCCGCATCTGCAGGG	142.841	100.6	0.860351	13.6336	121.72	7.24698	0.0595379		KRAS CDE Pos	SIAH2	ACAGGGAAACAGGACTGCCG	0	21.1571	0.706104	0	10.5786	0.353052	0.0333743	depleted
KRAS CDE Pos	ATF6	CACACAGCTCCCTAATCACG	300.298	290.539	9.03369	26.0278	295.418	17.5307	0.0593421		KRAS CDE Neg	DIRAS2	AACACCGCCAGCCCCAAACA	263.549	189.792	1.41221	13.6991	226.671	7.55566	0.0333332	depleted
KRAS CDE Neutral	MOK	GACAAATTGGTTGTTAGTAG	273.058	324.322	0.430176	34.7037	298.69	17.5669	0.0588132		KRAS CDE Neutral	INS	GAGGGGTCCCTGCAGAAGCG	25.7121	0	0	0.856194	12.8561	0.428097	0.0332993	depleted
KRAS CDE Pos	DEF6	TGCAACTAGAGGTGAAAGCT	220.573	268.767	0.860351	27.8869	244.67	14.3736	0.058747		KRAS CDE Neutral	IKZF3	GTATCCCATAGCCCTCACCC	392.11	292.466	9.88546	12.8429	342.288	11.3642	0.0332007	depleted
KRAS CDE Pos	GFI1	GTACTCATGGAGCGGCCTGG	160.779	166.666	0	19.211	163.722	9.60549	0.0586694		KRAS CDE Pos	FEZ2	GAGCCTGTGCTTCCGCCCCT	169.271	337.892	1.41221	15.4115	253.582	8.41185	0.0331722	depleted
KRAS CDE Neutral	GOLGB1	GTTCTCACGAAGACTCTGAC	663.047	508.255	67.9677	0.619709	585.651	34.2937	0.0585566		KRAS CDE Pos	TSPO	GACCCTCGCCGTGGACAAAG	0	51.6483	0	1.71239	25.8241	0.856194	0.0331548	depleted
KRAS CDE Neg	ARNTL2	TTCTGAAATGGGGGAGCTAG	227.217	345.343	0	33.4643	286.28	16.7321	0.0584468		NTC	NTC	TGGCACGGAGTTGCATACGC	334.258	458.612	1.41221	24.8296	396.435	13.1209	0.0330973	depleted
KRAS CDE Neutral	ODF2L	ACAAATTAAAATATTAGATC	404.605	359.607	0.430176	43.9994	382.106	22.2148	0.0581377		KRAS CDE Pos	DEF6	GGGGAAGACGTCCCTACACA	126.418	80.8949	0	6.84956	103.656	3.42478	0.0330397	depleted
KRAS CDE Neutral	GYS2	GGGAAAGGCAGATTTACCAC	350.126	218.467	0	32.8446	284.297	16.4223	0.0577646		KRAS CDE Pos	RXFP3	CACAAGATAATGATGCCCAG	201.412	174.235	2.11831	10.2743	187.823	6.19632	0.0329902	depleted
KRAS CDE Pos	SIAH2	AGGACATAGTCAAAGCAGAC	445.132	248.497	0.860351	39.0417	346.814	19.951	0.0575265		KRAS CDE Neutral	DNAJC6	CTTTATCTGGGTGCACCACC	632.09	609.823	0.706104	40.2411	620.956	20.4736	0.0329711	depleted
KRAS CDE Neutral	CLEC3A	AGACTCAAATTGAAAAGCTC	206.621	219.218	0	24.1687	212.919	12.0843	0.0567554		KRAS CDE Pos	GOLGA8O	CATCAGGCTGGAGCTCAGGG	141.417	224.017	0	11.9867	182.717	5.99336	0.0328014	depleted
KRAS CDE Neg	ZNF266	GAGTTTGTATACGCACAGCA	287.675	157.657	0.430176	24.7884	222.666	12.6093	0.0566287		KRAS CDE Neg	HSP90B1	ACAAGCGTACCAAACGGGCA	250.693	245.796	0	16.2677	248.245	8.13385	0.0327655	depleted
KRAS CDE Neutral	FGF9	CACTTAGAAATCTTCCCCAA	459.084	525.522	53.772	1.85913	492.303	27.8155	0.0565008		KRAS CDE Neg	LTA4H	ATCTAGTGACCAACAAAACT	100.706	445.544	0.706104	17.1239	273.125	8.915	0.0326407	depleted
NTC	NTC	GAACGTAACGGCATGCATCA	558.74	626.873	37.8555	29.1263	592.807	33.4909	0.0564955		KRAS CDE Neg	HIST1H3E	GCTCTCACAAACAGACCCCA	347.114	304.911	0.706104	20.5487	326.013	10.6274	0.0325981	depleted
KRAS CDE Neg	TCF7L2	CCATCAACCAGATCCTTGGG	241.833	294.293	29.6821	0	268.063	14.8411	0.0553641		KRAS CDE Neutral	XRCC2	GATGTGTAGTGCCTTCCATA	233.552	240.196	0	15.4115	236.874	7.70575	0.0325311	depleted
KRAS CDE Pos	C10orf53	CATCTATGGCCAACACAGCT	397.961	317.566	4.73193	34.7037	357.763	19.7178	0.0551141		KRAS CDE Pos	ITGB4	CTCAGGGCAGTGAACACCAG	4.28535	17.4235	0.706104	0	10.8544	0.353052	0.0325261	depleted
KRAS CDE Pos	COX8A	GTCAAGCCCCGCAGCAGCAG	98.3276	234.984	4.73193	13.6336	166.656	9.18277	0.0551003		KRAS CDE Neutral	ALOX15B	GCTTCTCTGAGTTGATACAG	681.371	503.415	16.2404	22.2611	592.393	19.2507	0.0324965	depleted
KRAS CDE Neutral	MTFR2	TCTGTAGACTCTGATAATTG	86.3689	241.74	18.0674	0	164.055	9.03369	0.0550651		KRAS CDE Neg	OR2L13	CATGATTCACCTCATCCACG	182.128	239.573	0	13.6991	210.85	6.84956	0.0324854	depleted
KRAS CDE Pos	ROBO3	CAGCTCGCCTCTTCCTCTGG	120.252	180.93	0.430176	16.1124	150.591	8.27131	0.0549257		KRAS CDE Neutral	DHH	GCACTGTGCCCCAGGTGAAG	0	21.7794	0.706104	0	10.8897	0.353052	0.0324207	depleted
KRAS CDE Neg	SEMA5B	TCGCTACCAGGAGAACCCCA	332.188	334.833	0	36.5628	333.51	18.2814	0.0548152		KRAS CDE Pos	SLC35D3	CCTCAGCCTGCCCATGTACG	2.14268	24.2685	0	0.856194	13.2056	0.428097	0.0324179	depleted
KRAS CDE Neg	PTH	GGGAAAACATCTGAACTCGA	465.063	237.987	37.8555	0.619709	351.525	19.2376	0.0547261		KRAS CDE Neutral	INHBB	GCGCAGGGCCGTGACCATGG	160.701	314.868	0	15.4115	237.784	7.70575	0.0324065	depleted
KRAS CDE Pos	SIAH2	GACCGGACACTCGAAGAGCG	147.491	206.455	0	19.211	176.973	9.60549	0.0542765		KRAS CDE Neutral	IKZF3	GCAGTTTAATGTGGCGGAGG	432.821	120.098	0.706104	17.1239	276.459	8.915	0.0322471	depleted
NTC	NTC	CGTAACCGGAGATAATATTA	419.221	399.397	9.03369	35.3234	409.309	22.1786	0.0541854		KRAS CDE Pos	ITGB4	CGTCTTCTGGAACATCTTGG	443.534	337.269	10.5916	14.5553	390.402	12.5734	0.0322064	depleted
KRAS CDE Neutral	MTFR2	GAGTCTACAGAGTTCAAGAG	459.084	541.288	0.430176	53.295	500.186	26.8626	0.0537052		KRAS CDE Pos	RCN2	TGATTATTAGGTACTACCCA	132.846	341.625	0.706104	14.5553	237.236	7.6307	0.0321651	depleted
KRAS CDE Neutral	CYP1A2	TGACCAAGCCTGAGATACAG	222.566	186.185	21.939	0	204.375	10.9695	0.0536732		KRAS CDE Neutral	AHCY	GGGCAGGAAATGAACCCCAA	160.701	105.786	0	8.56194	133.243	4.28097	0.032129	depleted
KRAS CDE Pos	EBF3	GATCATCTTGAAGCGAGCGG	243.162	186.185	0	22.9292	214.673	11.4646	0.053405		KRAS CDE Neg	LZTFL1	GGCTTTGTGACATCTAAGAT	267.835	160.545	0	13.6991	214.19	6.84956	0.0319789	depleted
KRAS CDE Neutral	NAGPA	CTGTGTCTCGTCACACTCTG	55.8076	91.591	0.430176	7.43651	73.6993	3.93334	0.0533702		KRAS CDE Neg	CELSR3	GGAGTCTTCCGGGGTCCGGG	85.7071	16.8012	0.706104	2.56858	51.2542	1.63734	0.0319456	depleted
KRAS CDE Neutral	KERA	GCTTTATATTGTGAAAATAG	426.529	367.115	0	42.1402	396.822	21.0701	0.0530971		KRAS CDE Pos	NKTR	AGAAAGTACCGGGAAGAAGG	156.415	112.631	0	8.56194	134.523	4.28097	0.0318234	depleted
KRAS CDE Neg	ST8SIA4	GATCGTCCACCTCTTCCTAA	223.23	284.533	0.430176	26.0278	253.882	13.229	0.0521069		KRAS CDE Pos	DDX60	CCAGTTTGGAAACAATTCGT	70.7083	225.883	0	9.41814	148.296	4.70907	0.0317546	depleted
KRAS CDE Neutral	KLB	TGTGGGACACAACTTGATCA	225.888	421.919	0.860351	32.8446	323.904	16.8525	0.0520293		NTC	NTC	GATGGCCAGTAACGGCGTCA	385.682	128.81	7.76714	8.56194	257.246	8.16454	0.0317383	depleted
KRAS CDE Neg	MGAT2	AGGCGGACAACCTGACGCTG	127.56	323.572	0.430176	22.9292	225.566	11.6797	0.0517796		KRAS CDE Neg	ZBTB2	AGATGGACTCAAATTTGCCG	83.5644	181.702	0.706104	7.70575	132.633	4.20593	0.0317109	depleted
KRAS CDE Neg	ARHGEF11	CCCGGGTTATTTCAACAACG	172.738	306.304	22.7993	1.85913	239.521	12.3292	0.0514745		NTC	NTC	GATCTTACCACTCGTCGTAG	2414.8	177.346	0	82.1947	1296.07	41.0973	0.0317092	depleted
KRAS CDE Neutral	PCDH9	GTGGAGCTGGGACATTTCTG	302.291	499.246	0	40.9008	400.769	20.4504	0.051028		KRAS CDE Pos	GFI1	GCACGGCTTTGTGCTGCTCC	149.987	184.191	2.82442	7.70575	167.089	5.26508	0.0315106	depleted
KRAS CDE Pos	COX8A	GAGGAAGGTCACGAAGCAGG	263.757	334.833	1.7207	28.5066	299.295	15.1137	0.0504975		KRAS CDE Neutral	HORMAD1	TCTTCACTAACACCAAAGAC	147.845	209.704	3.53052	7.70575	178.775	5.61813	0.0314258	depleted
NTC	NTC	ATGTTGCAGTTCGGCTCGAT	127.56	322.821	0.430176	22.3095	225.191	11.3699	0.0504899		KRAS CDE Neutral	BASP1	AATATTTATGAGCTAATACG	497.101	481.636	0.706104	29.9668	489.368	15.3365	0.0313393	depleted
KRAS CDE Pos	AGFG1	CAGTTGTAGGTCGTTCTCAA	306.942	341.59	0.430176	32.2249	324.266	16.3275	0.0503523		KRAS CDE Neg	OR1A1	GGTTGACATCTTCTTCTCAT	565.667	284.999	0	26.542	425.333	13.271	0.0312015	depleted
KRAS CDE Neg	PAX1	ACGTTGGGAGTGGTGACGCG	120.916	114.864	0	11.7745	117.89	5.88724	0.0499383		KRAS CDE Neutral	C2orf71	TGAAGGAGTCAATCAGCGAA	364.255	208.46	0.706104	17.1239	286.357	8.915	0.0311324	depleted
KRAS CDE Neutral	SMOX	GCATCTCCACTGAACAACCA	176.724	307.806	0	24.1687	242.265	12.0843	0.0498806		KRAS CDE Pos	SCLY	GGTGCCGGCGCATCCCTCCC	109.277	220.905	0	10.2743	165.091	5.13717	0.0311172	depleted
KRAS CDE Neg	NOS1AP	AGCTATGAGAATCGTTCGGA	245.155	239.488	0	24.1687	242.321	12.0843	0.049869		KRAS CDE Neg	HSP90B1	GTACCCACATCTGCTCCACG	74.9937	126.32	2.82442	3.42478	100.657	3.1246	0.031042	depleted
KRAS CDE Neg	P2RY12	ATGTGAAAGAGAGCACTCTG	8.63689	0	0.430176	0	4.31844	0.215088	0.0498068		KRAS CDE Neg	RDM1	AGACCCAGTGAAGACATCGT	173.557	296.2	0	14.5553	234.878	7.27765	0.0309848	depleted
KRAS CDE Pos	CYP1B1	GGACGCCTTTATCCTCTCTG	249.141	258.257	0.430176	24.7884	253.699	12.6093	0.0497017		KRAS CDE Neutral	GNPDA2	TGTTGGTGTGGGGACAGTGA	257.121	208.46	0.706104	13.6991	232.791	7.20261	0.0309403	depleted
KRAS CDE Neutral	SPATA13	GTATGGGACCAACCAGACGG	67.102	70.5701	0	6.8168	68.8361	3.4084	0.0495148		KRAS CDE Neg	IDH3A	TATCAAGCTCATCACCGAGG	40.7109	97.6961	0	4.28097	69.2035	2.14049	0.0309303	depleted
KRAS CDE Neutral	ARID3C	GCGTAGAGTGAAGGCGGCCG	51.8213	123.873	0	8.67593	87.8472	4.33796	0.0493808		KRAS CDE Neutral	ITGBL1	GGCCACGGCACATGTTCCTG	72.851	0.622268	1.41221	0.856194	36.7366	1.1342	0.0308738	depleted
KRAS CDE Pos	EN1	CCAGGCAAACCGCTACATCA	314.25	540.537	0.430176	41.5205	427.394	20.9753	0.0490774		KRAS CDE Neutral	TLE4	ATGGTTTGTAAGCACTGGAA	21.4268	29.2466	0.706104	0.856194	25.3367	0.781149	0.0308308	depleted
KRAS CDE Neg	HSD17B4	AGTAAAATAGATTCAGAAGG	346.14	464.712	39.146	0.619709	405.426	19.8828	0.0490419		KRAS CDE Pos	SLC39A9	AAACACAATTAACTGGACAC	409.251	538.262	0	29.1106	473.757	14.5553	0.0307232	depleted
KRAS CDE Neg	DIAPH1	CAGCTTTGTGAAGGATGCAC	201.97	114.864	0	15.4927	158.417	7.74637	0.0488985		KRAS CDE Neg	OR5T2	GTTACCTTATTTGTACTGAA	407.109	516.483	3.53052	24.8296	461.796	14.1801	0.0307064	depleted
KRAS CDE Pos	COX8A	TGTGACAGGATCCAGCCCGC	266.415	271.019	0.430176	25.4081	268.717	12.9191	0.0480771		KRAS CDE Pos	GH1	TGCCTGCCCTGGCTTCAAGA	96.4204	295.577	0	11.9867	195.999	5.99336	0.0305785	depleted
KRAS CDE Pos	ALOX5AP	CATCGTCACCCTCATCAGCG	18.6025	7.50746	0	1.23942	13.055	0.619709	0.0474691		KRAS CDE Neutral	DNAH9	ACTCTCTCTTGAGTACCACC	687.799	758.545	1.41221	42.8097	723.172	22.111	0.030575	depleted
KRAS CDE Pos	SLC35B4	ACGATTTGGGAAACACTCCA	376.701	525.522	0.430176	42.1402	451.112	21.2852	0.0471839		KRAS CDE Pos	PHC2	TTTATTCTCACCATTCTGGG	329.972	421.276	0.706104	22.2611	375.624	11.4836	0.030572	depleted
KRAS CDE Pos	TAS2R9	GCTTCAGCCAGAAGAAAAAT	599.931	445.193	2.58105	46.4782	522.562	24.5296	0.0469411		KRAS CDE Neutral	DNAJC6	GCCTTCTGTGGCGAGCTGAG	167.129	80.2726	0.706104	6.84956	123.701	3.77783	0.0305401	depleted
KRAS CDE Neutral	SMOX	CTTTCCATCTCCAACAACAT	235.189	187.687	0	19.8307	211.438	9.91535	0.0468949		KRAS CDE Neg	UPK1A	CCGTGAGGACCATGGACCGG	257.121	360.293	0	18.8363	308.707	9.41814	0.0305083	depleted
KRAS CDE Neg	IGSF10	TTCAAAGTGAGGGAGCCAAA	0	22.5224	0.430176	0.619709	11.2612	0.524942	0.0466152		KRAS CDE Neg	NACC1	AGGATCTGCTGGAAAGACTG	220.696	287.488	0	15.4115	254.092	7.70575	0.0303266	depleted
KRAS CDE Pos	CCSER2	AATGTTCGGCAGCCTCAGGA	214.593	144.894	0	16.7321	179.744	8.36607	0.0465445		NTC	NTC	AATCACCGACAACGTAAGAC	501.386	377.095	0	26.542	439.24	13.271	0.0302136	depleted
KRAS CDE Neg	WDR46	CGGAATCTCGATGAACACAG	67.7663	66.0657	0	6.19709	66.916	3.09855	0.046305		KRAS CDE Neutral	NLGN1	CCAAAGTTGGTAGCCACCAG	310.688	307.401	4.94273	13.6991	309.044	9.32092	0.0301605	depleted
KRAS CDE Neutral	LEO1	GAAGATTAGAATCTTGCCAA	272.394	354.352	0.430176	28.5066	313.373	14.4684	0.0461699		KRAS CDE Pos	ASB18	TTACCTAGCAGCATGCCGGT	77.1364	83.3839	1.41221	3.42478	80.2602	2.41849	0.0301332	depleted
KRAS CDE Neg	SLC5A8	TGTTATTTATGCCCCTGCCC	318.236	519.516	3.87158	34.7037	418.876	19.2876	0.0460462		KRAS CDE Neg	CPEB1	ACAAGTCATTTGCATCTGGG	254.979	247.663	1.41221	13.6991	251.321	7.55566	0.0300638	depleted
KRAS CDE Neutral	ELF2	TAAAAGAAACTCCCACAAAT	129.553	193.693	9.89404	4.95767	161.623	7.42586	0.0459456		KRAS CDE Pos	SLC26A9	GATGAGAGCGAAGATGAGCG	59.9949	15.5567	1.41221	0.856194	37.7758	1.1342	0.0300245	depleted
KRAS CDE Neg	SNRPG	AATGGTGGCAGACATGTCCA	306.942	526.273	37.8555	0	416.607	18.9277	0.045433		KRAS CDE Neg	OSTC	CGAGCACTAAGAACGGGACA	68.5656	235.217	1.41221	7.70575	151.892	4.55898	0.0300147	depleted
KRAS CDE Neg	OSTC	GTCATAGAACCGACACTTGG	227.217	188.437	2.15088	16.7321	207.827	9.44151	0.0454297		KRAS CDE Neg	DCTN6	TTAGGGTGGATCACTGTCCG	280.691	233.351	0	15.4115	257.021	7.70575	0.0299811	depleted
KRAS CDE Pos	EREG	CCATCTGCAGAAATAATATG	597.938	490.988	4.73193	44.6191	544.463	24.6755	0.0453208		KRAS CDE Pos	FEZ2	TGCCATTAAGGAGTACTCTG	51.4242	57.8709	0.706104	2.56858	54.6476	1.63734	0.0299619	depleted
KRAS CDE Neg	SLC10A5	AATTTATTTGACTTTCACAG	1225.11	978.973	14.1958	85.5199	1102.04	49.8578	0.0452414		KRAS CDE Neutral	SLC35G3	AGGCCACTGGTGGCATCAGA	23.5694	0	0.706104	0	11.7847	0.353052	0.0299585	depleted
KRAS CDE Pos	PIGR	GTTCTCGTCACAGTTCACGA	603.253	469.967	24.0898	24.1687	536.61	24.1292	0.0449661		KRAS CDE Neutral	SLC1A2	TCCTCATGAGTATATCCCCT	218.553	176.724	0.706104	11.1305	197.639	5.91832	0.0299451	depleted
KRAS CDE Neg	CCNT2	TCATCTGGAATGTAACCTGG	695.602	577.324	1.29053	55.7738	636.463	28.5322	0.0448293		KRAS CDE Neg	SCN10A	GATTACATCTTCAAACAAAA	192.841	78.4058	2.11831	5.99336	135.623	4.05584	0.0299052	depleted
KRAS CDE Neutral	CDH12	TATTGGAAGAATAAGAGCTG	269.072	177.927	0.430176	19.211	223.5	9.82058	0.04394		KRAS CDE Neg	EXOC3	CCTGACAACTGAGACCAGCA	188.556	415.053	0	17.9801	301.804	8.99004	0.0297877	depleted
KRAS CDE Pos	PRSS16	CTTCCTCCACTCACGCAAGG	163.436	228.227	0.430176	16.7321	195.832	8.58116	0.0438191		KRAS CDE Neutral	DNAJC6	CCCAGGCATTACGGACAAAG	192.841	151.211	4.23662	5.99336	172.026	5.11499	0.0297338	depleted
KRAS CDE Neg	DCTN6	ATTATTATCTCCCATCTTCA	589.966	601.348	0	52.0556	595.657	26.0278	0.0436959		KRAS CDE Neg	KRT28	TTCCATCTCCATCTATCAGG	94.2778	50.4037	0	4.28097	72.3407	2.14049	0.0295889	depleted
KRAS CDE Pos	EID2	ATATCGAGGTCCACCCTGTG	433.173	211.71	0.860351	27.2672	322.442	14.0638	0.0436165		KRAS CDE Pos	PRTN3	AACCCGGGCAGCCACTTCTG	244.265	215.305	0.706104	12.8429	229.785	6.77451	0.029482	depleted
KRAS CDE Pos	MUC17	TGTGGTGGTACTACTACTGG	372.715	440.688	0	35.3234	406.701	17.6617	0.0434267		KRAS CDE Neutral	PCDH9	CTCACATCAATGCTGCCACA	199.269	149.967	0	10.2743	174.618	5.13717	0.0294195	depleted
KRAS CDE Neutral	COMMD7	CCAGAGTTATGAAATCCGCC	581.993	540.537	42.1572	6.19709	561.265	24.1772	0.0430762		KRAS CDE Pos	SCUBE2	ACAAGATGCACACAGATGGG	737.081	642.181	10.5916	29.9668	689.631	20.2792	0.0294059	depleted
KRAS CDE Neg	GRB10	CTTGCTGTTTAATGATCCTG	328.866	423.421	30.9726	1.23942	376.143	16.106	0.0428189		KRAS CDE Pos	ZBTB4	AGAAGGGACTTGAAGCAGCC	160.701	44.181	0	5.99336	102.441	2.99668	0.0292528	depleted
KRAS CDE Neg	ALOXE3	CCCGTGTCCTGTGATCCAGG	213.265	198.948	6.45263	11.1548	206.106	8.8037	0.0427144		KRAS CDE Neutral	GOLGB1	GTGCCACAGGAGCCAATGAT	469.246	175.48	0	18.8363	322.363	9.41814	0.029216	depleted
KRAS CDE Neutral	AARD	GGGAAATTCTCTCTCTGCAG	239.84	167.416	0	17.3519	203.628	8.67593	0.0426067		KRAS CDE Pos	ANKRD45	ACTGACACAGAAAAGGGATC	192.841	243.307	4.94273	7.70575	218.074	6.32424	0.0290004	depleted
KRAS CDE Neg	CSGALNACT2	TTCCTGGTTGGCATAAACAA	292.99	222.221	1.29053	20.4504	257.605	10.8705	0.0421981		KRAS CDE Neutral	GPR150	TAGACCTGCAGGTGCCAGCG	188.556	131.299	0.706104	8.56194	159.927	4.63402	0.0289759	depleted
KRAS CDE Pos	AGFG1	ATAGATTTCACCCTGTGTGG	253.792	144.143	0	16.7321	198.967	8.36607	0.0420475		KRAS CDE Neutral	ZBBX	TCTTTAAGTTCAATATTAAG	158.558	191.659	0.706104	9.41814	175.108	5.06212	0.0289085	depleted
KRAS CDE Neg	GABPA	ATAGACATCAATGAACCAAT	721.512	498.496	49.9004	1.23942	610.004	25.5699	0.0419176		KRAS CDE Neutral	CLEC3A	ACACATCCAGATTAAAAGCC	222.838	300.556	1.41221	13.6991	261.697	7.55566	0.0288718	depleted
KRAS CDE Neutral	DEFA6	TGAGCTTGCATCCTCTGCAA	41.8557	91.591	0	5.57738	66.7234	2.78869	0.0417948		KRAS CDE Neutral	PPP3CA	CTTACCTTTCACCACCCTGT	109.277	420.031	0.706104	14.5553	264.654	7.6307	0.0288328	depleted
KRAS CDE Neg	DDX23	TCTGGCCAAGAAAAAGGCTG	121.581	101.351	0	9.29564	111.466	4.64782	0.0416973		KRAS CDE Pos	ANKRD45	CATGCCGTGCAAAAAATGAG	576.38	546.974	0.706104	31.6792	561.677	16.1926	0.0288291	depleted
KRAS CDE Pos	PTPN5	GCATCTGCTGCCAGCAGCTG	45.8419	133.633	0	7.43651	89.7374	3.71826	0.0414349		KRAS CDE Neutral	VPS26A	GCCAAATATGAAATAATGGA	87.8497	121.342	0	5.99336	104.596	2.99668	0.02865	depleted
NTC	NTC	GCCTATGTGAATCGCGAATT	225.888	173.422	0.430176	16.1124	199.655	8.27131	0.041428		KRAS CDE Neg	KRTAP4-2	GTTGCAGTAGAATAAGTCCA	227.124	306.156	0.706104	14.5553	266.64	7.6307	0.028618	depleted
KRAS CDE Neutral	TAS2R19	TCTTAATTCTCTTCTTTAGG	235.853	129.879	0.860351	14.2533	182.866	7.55683	0.0413244		KRAS CDE Neg	MAP2K1	GAGTTGACTAGGATGTTGGA	205.697	172.368	5.64883	5.13717	189.033	5.393	0.0285295	depleted
KRAS CDE Neg	ST8SIA4	GTGTAATCTAGCTCCTGTGG	382.681	313.812	0.860351	27.8869	348.246	14.3736	0.0412743		KRAS CDE Neutral	DHH	TCACCAGCTCCTCATCCGTC	117.847	182.325	0	8.56194	150.086	4.28097	0.0285235	depleted
KRAS CDE Pos	FN1	GCTTTGACTGACAGCCACCG	198.648	238.737	0	17.9716	218.693	8.98578	0.0410886		KRAS CDE Neutral	KERA	TCTGCTGCCCCGAGTGCGCG	143.559	91.4734	0.706104	5.99336	117.516	3.34973	0.0285044	depleted
KRAS CDE Neutral	C14orf93	AGAGTTGCTTGGCATAAGCA	119.588	80.3298	2.58105	5.57738	99.9588	4.07922	0.040809		KRAS CDE Neg	PSMB10	CGATCAGCGATGCACCCACG	81.4217	249.53	0	9.41814	165.476	4.70907	0.0284578	depleted
KRAS CDE Neutral	KERA	TCTGCTGCCCCGAGTGCGCG	83.7114	205.704	0	11.7745	144.708	5.88724	0.0406836		KRAS CDE Neg	XYLT1	CCATTCTCCAGGGGGTGACG	400.681	291.844	0	19.6925	346.262	9.84624	0.0284358	depleted
KRAS CDE Neg	OR5C1	GGAATAGCAGGCATCCAGCA	289.004	195.945	0.430176	19.211	242.474	9.82058	0.0405016		KRAS CDE Neg	ZBTB3	GGTACTGTCTGCCTCTGCCA	259.264	373.361	0	17.9801	316.312	8.99004	0.0284214	depleted
KRAS CDE Neutral	MAFG	CTTCATGCTGGCGTTCTCTG	990.584	739.485	1.7207	68.168	865.035	34.9444	0.0403965		NTC	NTC	TCTGCACCGCGACTTAGCTT	437.106	431.854	0.706104	23.9734	434.48	12.3398	0.0284012	depleted
KRAS CDE Neg	GIP	GGACTAGGAGAGAAGAAAGA	102.314	99.8493	0	8.05622	101.082	4.02811	0.0398501		KRAS CDE Pos	HOXD1	CCACTCGAACGTGCTGAAGG	164.986	193.525	0.706104	9.41814	179.256	5.06212	0.0282397	depleted
KRAS CDE Pos	CREM	CAACACGCAAACGAGAGCTG	124.903	193.693	0.860351	11.7745	159.298	6.31741	0.0396579		KRAS CDE Neutral	RAB3IL1	TGGACAACTACGCAGCAAGA	527.098	413.808	0	26.542	470.453	13.271	0.028209	depleted
KRAS CDE Neg	ITPR2	TAGAGCTTCTTGATAACCCA	403.941	454.952	0.860351	32.8446	429.446	16.8525	0.0392423		KRAS CDE Neg	MAP2K1	AATCCGGAACCAGATCATAA	134.989	217.172	5.64883	4.28097	176.08	4.9649	0.0281968	depleted
NTC	NTC	AATCACCGACAACGTAAGAC	546.117	294.293	32.2632	0.619709	420.205	16.4414	0.0391272		NTC	NTC	TCCGTACATCGACCTATTAC	302.117	276.287	0	16.2677	289.202	8.13385	0.0281251	depleted
KRAS CDE Neg	BICD1	CTTGCAGCACCATCATGTAA	283.689	484.231	29.6821	0	383.96	14.8411	0.0386526		KRAS CDE Pos	ATF6	TCTTGTGGTCTTGTTATGGG	559.239	217.172	2.11831	19.6925	388.205	10.9054	0.0280918	depleted
NTC	NTC	GGATCGATCCGAGGAACGTG	56.472	57.0567	0	4.33796	56.7643	2.16898	0.0382103		KRAS CDE Neutral	RP1	GGAAGGGAGCCATTTAAACC	649.231	649.648	2.11831	34.2478	649.44	18.183	0.0279981	depleted
KRAS CDE Neutral	ADSL	CCAGTGGTTTGAACGCACAC	192.005	198.948	0	14.873	195.476	7.43651	0.0380431		KRAS CDE Neg	LTA4H	AAAATAGCAGAAGATCTGGG	308.545	172.368	1.41221	11.9867	240.457	6.69947	0.0278614	depleted
KRAS CDE Pos	MLYCD	GACTTCGTGAGCTTCTACGG	171.409	118.618	10.3242	0.619709	145.013	5.47196	0.0377342		KRAS CDE Neg	RAP1B	GATAGAAGATTCTTATAGAA	1032.77	640.314	22.5953	23.9734	836.542	23.2844	0.0278341	depleted
KRAS CDE Neutral	PFDN6	CCCAGCTTCGGGATCTTGAG	500.939	678.675	0.430176	43.9994	589.807	22.2148	0.0376645		KRAS CDE Pos	FN1	TCTGCCACTGTTCTCCTACG	23.5694	37.9584	0	1.71239	30.7639	0.856194	0.0278311	depleted
KRAS CDE Neg	RPE	TTGGATATAGAGGTCGATGG	167.423	75.0746	0.430176	8.67593	121.249	4.55305	0.0375514		KRAS CDE Neutral	VGLL2	CCAGGGGGACATCAGCTCCG	47.1389	75.9167	0	3.42478	61.5278	1.71239	0.0278311	depleted
KRAS CDE Pos	GOLGA8O	TCACCTCATACAATTCCAGG	559.405	496.994	0	39.6614	528.199	19.8307	0.037544		KRAS CDE Neutral	SLC6A6	ATGGACCAAAATGTGGGCAG	351.399	350.959	0.706104	18.8363	351.179	9.77119	0.027824	depleted
KRAS CDE Pos	PRSS16	ATACTCGGAGAAATCCAGCA	138.19	209.458	0	13.0139	173.824	6.50695	0.0374341		KRAS CDE Neutral	HAL	GACCTGCTATTTCTGATGGG	143.559	352.826	0	13.6991	248.193	6.84956	0.0275977	depleted
KRAS CDE Pos	EZH2	TTATCAGAAGGAAATTTCCG	41.1913	20.2701	0.430176	1.85913	30.7307	1.14465	0.0372478		KRAS CDE Neutral	CLEC3A	GAAGACTGCATTTCCAAAGG	0	31.1134	0	0.856194	15.5567	0.428097	0.0275185	depleted
KRAS CDE Neg	PELI2	TTTGTCAAGGAATCAGACTG	339.496	452.7	27.5312	1.85913	396.098	14.6952	0.0370999		KRAS CDE Neg	OR5T2	ATACTCAGAAAATAGTACAT	113.562	384.562	0	13.6991	249.062	6.84956	0.0275014	depleted
KRAS CDE Neutral	NEK2	TTTCAGATCCCGATGCAATA	219.244	169.669	3.87158	10.5351	194.456	7.20332	0.0370434		KRAS CDE Pos	DEPDC1B	CCACCGCAGACAGCTGACAG	188.556	216.549	0	11.1305	202.552	5.56526	0.0274757	depleted
KRAS CDE Neg	PTPN1	GGCCCTTTGCCTAACACATG	148.156	203.452	0	13.0139	175.804	6.50695	0.0370125		KRAS CDE Neutral	UGT2B4	ACTTGTCCAGAGAGGTCATG	321.401	265.709	0.706104	15.4115	293.555	8.0588	0.0274524	depleted
KRAS CDE Neutral	ADSL	GGAGAACATCGACTTCAAGA	249.805	159.909	0.860351	14.2533	204.857	7.55683	0.0368883		KRAS CDE Neutral	OR7D2	CTTCATGAACCTCAGCCTGG	389.967	293.088	8.47325	10.2743	341.528	9.37379	0.0274466	depleted
KRAS CDE Neg	WASF3	AAGAGCTTAGACCCGACAAC	407.262	260.509	0.430176	24.1687	333.886	12.2994	0.0368372		KRAS CDE Pos	SNRPF	AGGAAAGGTTTGGGATTGAG	242.122	350.959	0	16.2677	296.541	8.13385	0.0274291	depleted
KRAS CDE Pos	EMB	TTATTCTTGTTTCTTTCGAG	608.568	486.484	38.7158	0.619709	547.526	19.6678	0.0359211		KRAS CDE Neutral	NEK2	TGTACAGTGTTGTATTGGTC	154.273	121.342	0.706104	6.84956	137.808	3.77783	0.0274138	depleted
KRAS CDE Pos	SLC30A10	TGTGCTTCCCCTGAAGAGTG	208.614	269.518	16.3467	0.619709	239.066	8.48319	0.0354847		KRAS CDE Neg	FAM162A	ACAAAACCACAGGAAAGTCC	248.55	95.207	0	9.41814	171.879	4.70907	0.0273976	depleted
KRAS CDE Neg	PELI2	GGAATGAACCTTACACAGCA	265.75	249.248	17.6372	0.619709	257.499	9.12845	0.0354504		KRAS CDE Neutral	ZCCHC6	TGAGTCTGTACTTTCAACGA	257.121	180.458	0	11.9867	218.789	5.99336	0.0273933	depleted
KRAS CDE Neutral	AKAP13	CAGCCCCATTGAGCAAGATG	100.321	108.107	1.7207	5.57738	104.214	3.64904	0.0350149		KRAS CDE Neg	PELI2	GTAGATTTGCCCTCTACAAG	220.696	413.808	7.06104	10.2743	317.252	8.66769	0.0273211	depleted
KRAS CDE Neutral	PARP8	CACTTCCATACATTGCACCA	176.724	204.954	0.860351	12.3942	190.839	6.62727	0.034727		KRAS CDE Pos	HAND1	CCTTTCCTGATGACAGCGCG	128.561	398.874	0.706104	13.6991	263.717	7.20261	0.0273119	depleted
KRAS CDE Pos	CCDC7	TCCATAGGTTTCTTCCAAAG	17.9381	0	0	0.619709	8.96907	0.309855	0.034547		KRAS CDE Pos	MTF2	CAGATGAAAAATGGCTCTGT	2.14268	29.2466	0	0.856194	15.6946	0.428097	0.0272766	depleted
KRAS CDE Neg	WDR93	TCTTTGCAAAGACTTCCAGG	86.3689	208.707	0	9.91535	147.538	4.95767	0.0336027		KRAS CDE Neutral	RABEP1	AATTACGAAAAACAGTTACA	23.5694	54.1373	2.11831	0	38.8534	1.05916	0.0272603	depleted
KRAS CDE Neutral	DHX57	AAGTTTGTCACCAAGAACGA	480.344	260.509	0	24.7884	370.426	12.3942	0.0334592		KRAS CDE Pos	TARBP1	CCAGCAGCTTCTCCTCTACG	381.396	431.854	12.7099	9.41814	406.625	11.064	0.0272093	depleted
KRAS CDE Neg	SLC12A6	GAGTCAGAACTCCATCACAG	2.6575	104.354	1.7207	1.85913	53.5056	1.78992	0.0334528		KRAS CDE Neg	RDM1	AAGAACTTCAGGCTTTGCTT	197.126	117.609	0	8.56194	157.367	4.28097	0.0272037	depleted
KRAS CDE Neutral	EMILIN3	AATACCGGCAGTGTAGATGG	143.505	211.71	0	11.7745	177.608	5.88724	0.0331474		KRAS CDE Neg	TAF6	TTACTTCTATGAGGAGAAGG	308.545	222.772	0.706104	13.6991	265.659	7.20261	0.0271123	depleted
KRAS CDE Neg	DNAJC22	TTTGCCCTAGAGGATGGCCA	237.847	113.363	0.430176	11.1548	175.605	5.79247	0.0329859		KRAS CDE Pos	SLC24A2	TCTTATCACCAGTGTCATAG	139.274	431.232	0	15.4115	285.253	7.70575	0.0270137	depleted
KRAS CDE Neutral	CABP1	CGAAGTCATCAAAATCTACA	307.606	275.524	0	19.211	291.565	9.60549	0.0329446		KRAS CDE Pos	MTF2	TTCCCTCTAATGTAGAGGGG	104.991	53.5151	0	4.28097	79.2531	2.14049	0.0270082	depleted
KRAS CDE Neutral	IMPACT	AGATAGGTGGAGCTGTACCT	230.538	207.206	0	14.2533	218.872	7.12666	0.0325608		KRAS CDE Neg	POLR3F	GGTTTGGTCCGGGCACCCTG	599.949	395.14	2.82442	23.9734	497.545	13.3989	0.0269301	depleted
KRAS CDE Neg	ATP6V1C1	TAGCCGAAATGGTAGTTCCA	231.867	248.497	0.430176	14.873	240.182	7.6516	0.0318575		KRAS CDE Neg	ALOXE3	CCCGTGTCCTGTGATCCAGG	383.539	183.569	0.706104	14.5553	283.554	7.6307	0.0269109	depleted
KRAS CDE Neutral	SLC9B1	AAACACACATAGTCAAAACA	296.312	450.448	23.6597	0	373.38	11.8298	0.0316831		KRAS CDE Neutral	PFKFB2	GTCATGCCGAAAGAAGTCGT	261.407	377.095	0	17.1239	319.251	8.56194	0.0268189	depleted
KRAS CDE Pos	ZBTB4	GCTGTCCTCTTCAGGCTGCG	65.7732	111.11	0	5.57738	88.4418	2.78869	0.0315314		NTC	NTC	GGACCAATGTTACCGTAGGT	72.851	246.418	0	8.56194	159.635	4.28097	0.0268173	depleted
KRAS CDE Neg	ZFP3	TACAGTGAACACTTTGATGT	71.0882	216.215	3.4414	5.57738	143.652	4.50939	0.0313912		KRAS CDE Neg	KBTBD12	ATTAGCAGAAATGATTGATG	505.672	640.936	0.706104	29.9668	573.304	15.3365	0.026751	depleted
KRAS CDE Pos	ASB18	GCCTCTGCACCTCTGCCGCA	446.461	376.124	4.73193	21.0701	411.292	12.901	0.031367		KRAS CDE Pos	PXDNL	TGTCATGCCAACAATAGCCA	692.085	583.065	0.706104	33.3916	637.575	17.0488	0.0267401	depleted
KRAS CDE Neg	ACTL7A	CACCCACAAGATCTCAACAA	162.108	72.8224	3.01123	4.33796	117.465	3.6746	0.0312825		KRAS CDE Neutral	RABL2A	GCTCTGTATACCAGGTGCTC	278.548	138.144	0	11.1305	208.346	5.56526	0.0267117	depleted
KRAS CDE Neutral	POLR1D	TGGTCTTGCTCTTTATGAGA	282.36	304.052	17.6372	0.619709	293.206	9.12845	0.0311332		KRAS CDE Pos	FN1	CACTTCCAAAGCCTAAGCAC	72.851	50.4037	0.706104	2.56858	61.6274	1.63734	0.0265685	depleted
KRAS CDE Pos	ATXN7L2	TTGGATGATGAAGGCCCCTG	442.474	354.352	0	24.7884	398.413	12.3942	0.0311089		KRAS CDE Neutral	SH3BP5L	CATCCAGCTGTAGTTCCACC	66.423	316.112	0.706104	9.41814	191.268	5.06212	0.0264662	depleted
KRAS CDE Neutral	SOS2	TCTGAAGAAGCAGATACTGG	61.1226	60.8104	1.29053	2.47884	60.9665	1.88468	0.0309134		KRAS CDE Neutral	SDHD	CTATTTCAACTATCACGATG	145.702	145.611	0	7.70575	145.656	3.85287	0.0264518	depleted
KRAS CDE Pos	HLA-DRB5	AGACATCTATAACCAAGAGG	675.006	376.124	0.860351	31.6052	525.565	16.2328	0.0308863		KRAS CDE Pos	GRB2	ACGAGCTGAGCTTCAAAAGG	0	91.4734	0.706104	1.71239	45.7367	1.20925	0.0264393	depleted
KRAS CDE Neg	CPD	CTGCACGACTCCCTTCCTTG	304.949	237.236	0	16.7321	271.092	8.36607	0.0308606		KRAS CDE Neutral	ST3GAL6	CAGATTCTGGATAAAAAAGT	14.9987	65.3382	2.11831	0	40.1685	1.05916	0.0263679	depleted
KRAS CDE Neutral	S100A7A	AGAAGTGCCAAGCAGCACAG	312.257	311.56	0.430176	18.5913	311.908	9.51073	0.0304921		KRAS CDE Neutral	GLUCM	GCCTCATCGTGACCACCAGA	278.548	176.102	0	11.9867	227.325	5.99336	0.0263647	depleted
KRAS CDE Pos	PDZRN3	ACGGACGATGAAGACGACAT	110.286	87.0866	0.430176	5.57738	98.6865	3.00378	0.0304376		KRAS CDE Neutral	ABCF3	GCGAGAGGATTTGCTACGGA	53.5669	109.519	0	4.28097	81.5431	2.14049	0.0262498	depleted
KRAS CDE Pos	PXDNL	TGTCATGCCAACAATAGCCA	655.075	568.315	0.430176	36.5628	611.695	18.4965	0.0302381		KRAS CDE Neutral	ATP5L2	TCCATTTGTCCGTAACCTTG	334.258	373.983	1.41221	17.1239	354.12	9.26805	0.026172	depleted
KRAS CDE Pos	TMEM246	CCTCATAGCGATTGGCCACA	560.733	650.146	36.5649	0	605.44	18.2825	0.030197		NTC	NTC	CTTTATTCCGTTGCATGTCG	2.14268	84.6285	1.41221	0.856194	43.3856	1.1342	0.0261424	depleted
KRAS CDE Neg	CPEB1	TGTCCACCAAGTCAGACCCA	265.75	218.467	0.860351	13.6336	242.109	7.24698	0.0299327		KRAS CDE Pos	YWHAQ	CTCCGTGGCCTACAAGAACG	252.836	266.331	0.706104	12.8429	259.583	6.77451	0.0260976	depleted
KRAS CDE Neutral	ZNF705A	TGAATTTGTTTATGTGGTTT	187.354	144.894	0	9.91535	166.124	4.95767	0.0298432		KRAS CDE Pos	CLDN23	GACGTCCACCGAGTTGGTGT	25.7121	28.6243	1.41221	0	27.1682	0.706104	0.0259901	depleted
KRAS CDE Neg	POLR1E	CTTCAACGCTTCTATGACAA	463.07	115.615	17.207	0	289.342	8.60351	0.0297347		KRAS CDE Neg	GABPA	TAAGCTAAATCAGCCTGAAC	70.7083	23.0239	0.706104	1.71239	46.8661	1.20925	0.0258021	depleted
KRAS CDE Neutral	HADHA	AGTTGGTCTCAAGCAGGGGA	274.387	156.906	0.430176	12.3942	215.647	6.41218	0.0297347		KRAS CDE Pos	AGFG1	CCAACACTGCACTTAAATAA	259.264	144.366	3.53052	6.84956	201.815	5.19004	0.0257168	depleted
KRAS CDE Neutral	SOS2	TCTACCTCAGGTACTTTACG	166.094	231.23	0	11.7745	198.662	5.88724	0.0296345		KRAS CDE Neg	KBTBD12	GATGTGGTACTCACAGCAGA	293.547	378.339	3.53052	13.6991	335.943	8.61482	0.0256437	depleted
KRAS CDE Neg	VDAC1	TAGCACCAGAGCACCCCGGA	167.423	125.375	0	8.67593	146.399	4.33796	0.0296312		KRAS CDE Neutral	GOLGB1	AGAGGCTCAGAATAGAACTG	12.8561	103.297	2.11831	0.856194	58.0763	1.48725	0.0256086	depleted
KRAS CDE Pos	PEAK1	CAGAGACAAGCACTTTATCG	105.636	45.0448	2.58105	1.85913	75.3403	2.22009	0.0294675		KRAS CDE Neutral	RAB5I	CCGTCTGGAGTAAGGTGCTG	167.129	104.541	3.53052	3.42478	135.835	3.47765	0.025602	depleted
NTC	NTC	GCAAATAGGTCGGAGCGTGT	442.474	126.125	0.430176	16.1124	284.3	8.27131	0.0290936		KRAS CDE Pos	SPSB4	TGCCACTGATGGACCTGTGC	503.529	500.304	0	25.6858	501.916	12.8429	0.0255878	depleted
KRAS CDE Neg	PTPN1	GTGGAAGGAGCTTTCCCACG	7.97251	13.5134	0	0.619709	10.743	0.309855	0.0288425		KRAS CDE Neg	LSM1	CTGACCACAAAAATCCCTCG	94.2778	173.613	0	6.84956	133.945	3.42478	0.0255685	depleted
KRAS CDE Pos	TWIST1	GATTCAGACCCTCAAGCTGG	550.768	421.169	2.58105	25.4081	485.968	13.9946	0.0287973		KRAS CDE Neg	RPAP1	GTTAGCCCAGGTCATCAGCA	299.975	196.637	0.706104	11.9867	248.306	6.34641	0.0255589	depleted
KRAS CDE Neutral	TAS2R19	GTTCTTGGAAATGTTGCCAA	126.896	348.346	0	13.6336	237.621	6.8168	0.0286877		KRAS CDE Neutral	OTUD4	GTTAGAGTGCCCTTCTCCTG	299.975	393.896	1.41221	16.2677	346.935	8.83995	0.0254801	depleted
KRAS CDE Pos	SCRG1	TCACAACTGTCACAACCTTC	238.511	213.212	1.7207	11.1548	225.861	6.43773	0.028503		KRAS CDE Pos	SYNJ1	GCAGAAAAAGAGGCAATCAA	359.97	581.821	0	23.9734	470.895	11.9867	0.0254552	depleted
KRAS CDE Neg	NCOA6	ACAGGCTGCTGAAATCCCTG	222.566	191.44	0	11.7745	207.003	5.88724	0.0284403		NTC	NTC	CGGGCACTAACCCGATACAC	456.39	401.985	2.11831	19.6925	429.188	10.9054	0.0254094	depleted
KRAS CDE Neutral	SRMS	GGAGCTGAGTGTCCGCCGCG	162.772	157.657	0.430176	8.67593	160.214	4.55305	0.0284185		KRAS CDE Pos	TCF3	GATAGAAGACCACCTGGACG	265.692	411.942	7.76714	9.41814	338.817	8.59264	0.0253607	depleted
KRAS CDE Neutral	ST3GAL6	TTAAGCCACATGATTTAAGG	47.8351	152.401	0	5.57738	100.118	2.78869	0.027854		KRAS CDE Neutral	PRDM9	GAAGTGTTCTCTGCAGCACG	274.263	192.903	0.706104	11.1305	233.583	5.91832	0.0253371	depleted
NTC	NTC	ACAACACGCCGACACGTCTA	306.277	485.733	1.29053	20.4504	396.005	10.8705	0.0274503		KRAS CDE Neutral	PTP4A2	GAAGTATGGAGTGACGACTT	149.987	222.15	0	9.41814	186.069	4.70907	0.0253082	depleted
KRAS CDE Neg	AP4E1	TAACTTTCTGAGACTACTAG	22.5888	0	0	0.619709	11.2944	0.309855	0.0274344		KRAS CDE Neutral	OTUD4	AAGACCCGAACCAAGCACAT	239.98	338.514	0	14.5553	289.247	7.27765	0.0251607	depleted
KRAS CDE Pos	CDHR2	TGCGGTTGTTGGCTTCCGTC	102.978	282.281	0	10.5351	192.629	5.26753	0.0273454		KRAS CDE Neutral	GPR139	GTAAACCGAGGCACAGCAAG	239.98	163.034	0.706104	9.41814	201.507	5.06212	0.0251213	depleted
KRAS CDE Neutral	GPR150	CTGCAGCTCACTCAAGATGA	199.313	135.134	0.430176	8.67593	167.224	4.55305	0.0272273		KRAS CDE Neutral	ALOX15B	GCTCCAGCAACAGCGCCAGG	53.5669	59.1155	2.82442	0	56.3412	1.41221	0.0250653	depleted
KRAS CDE Neg	OLFM4	AAAACTGGTCATACAGCTGA	376.037	382.13	0	20.4504	379.083	10.2252	0.0269735		KRAS CDE Neutral	ZNF730	ACAGTTTGAGGACTCATTAA	19.2841	14.9344	0	0.856194	17.1093	0.428097	0.0250214	depleted
KRAS CDE Neutral	PRDM9	GTTCTCTCTGTGTCTTCTTC	455.097	815.31	0.860351	32.8446	635.204	16.8525	0.0265308		KRAS CDE Pos	SCLY	AGAGGTGGACGACATCCTCG	104.991	19.9126	1.41221	1.71239	62.4519	1.5623	0.025016	depleted
KRAS CDE Pos	DUSP2	GCGGGTCTCGTGCAGCAGCG	9.30126	14.2642	0	0.619709	11.7827	0.309855	0.0262974		KRAS CDE Pos	KIF17	AAAACCTCTGCAGCAGACAA	128.561	310.512	0.706104	10.2743	219.536	5.49022	0.0250083	depleted
KRAS CDE Neutral	C14orf93	GCCTCTCAAGGAAAGTCCCG	279.702	257.506	12.0449	1.85913	268.604	6.95202	0.025882		KRAS CDE Neutral	PLCG2	CCCTATCTGGGCTCCAACAC	68.5656	205.971	0	6.84956	137.268	3.42478	0.0249495	depleted
KRAS CDE Neutral	HADHA	CACCTGGTAGTATAGAAGCC	370.722	352.851	0	18.5913	361.786	9.29564	0.0256937		NTC	NTC	GCTTGTAATCTAAAGACGCG	182.128	300.556	0	11.9867	241.342	5.99336	0.0248335	depleted
KRAS CDE Neg	MMAB	GGCAGGATGAAGGCCGTGAG	283.689	228.227	0	13.0139	255.958	6.50695	0.025422		KRAS CDE Pos	RERGL	GCTTTGCAGCCCTTACAGTG	51.4242	68.4495	2.11831	0.856194	59.9369	1.48725	0.0248137	depleted
KRAS CDE Pos	DUSP2	AGCGGAAAAGGCCCTCAAAG	17.2738	0	0.430176	0	8.63689	0.215088	0.0249034		KRAS CDE Pos	CELA3B	AGAGGTCCCCAGAGTTGATG	317.116	293.711	1.41221	13.6991	305.413	7.55566	0.0247391	depleted
KRAS CDE Pos	RAPGEF3	GGGCCAGTCGGTATACCCGG	413.242	215.464	0.430176	14.873	314.353	7.6516	0.0243408		KRAS CDE Neutral	DGCR6	TAACCTGCCTGTGCTTCAGG	177.842	377.095	0	13.6991	277.468	6.84956	0.0246859	depleted
KRAS CDE Neg	IYD	TTAAGTCTTCATCCACCCAG	326.209	188.437	6.02246	6.19709	257.323	6.10978	0.0237436		KRAS CDE Neutral	MTFR2	GAGTCTACAGAGTTCAAGAG	291.404	298.689	0	14.5553	295.046	7.27765	0.0246661	depleted
KRAS CDE Neg	VAPA	TCATTAAGTGAAACACTGTG	411.913	409.157	1.29053	17.9716	410.535	9.63105	0.0234598		KRAS CDE Neutral	GOLGB1	TATCGCAGAGCTGAATGGAA	38.5682	24.8907	0.706104	0.856194	31.7295	0.781149	0.0246191	depleted
KRAS CDE Neg	LZTFL1	AACAGCAGAACTCCTAAACA	58.4651	114.864	2.15088	1.85913	86.6646	2.005	0.0231352		KRAS CDE Neg	DCTN6	ATTATTATCTCCCATCTTCA	672.8	753.567	0	35.104	713.184	17.552	0.0246108	depleted
KRAS CDE Pos	PPID	AGTAATTAAAGGAATAGGAG	18.6025	0	0.430176	0	9.30126	0.215088	0.0231246		KRAS CDE Pos	LBH	CTTGGCCGATCTCAGATAGT	250.693	172.991	0	10.2743	211.842	5.13717	0.02425	depleted
NTC	NTC	GTTATTTGTCTGTCGAAACG	230.538	167.416	0.430176	8.67593	198.977	4.55305	0.0228823		KRAS CDE Pos	CCDC3	CTCGTGCCACTCCCACACCG	192.841	370.25	0.706104	12.8429	281.545	6.77451	0.0240619	depleted
KRAS CDE Neg	UPK1A	GATGGCGTCTGCGGCAGCAG	186.69	122.372	0	6.8168	154.531	3.4084	0.0220565		KRAS CDE Neutral	EFTUD2	AAAGCTTTGATGGTGTACAG	381.396	439.944	0	19.6925	410.67	9.84624	0.023976	depleted
KRAS CDE Pos	FZD9	CACAGAGCAGCCATGCGCAG	61.1226	15.7657	0.430176	1.23942	38.4441	0.834797	0.0217146		KRAS CDE Neg	MMAA	GCAAAGGGCCTGTTTAGCAG	55.7096	74.6722	1.41221	1.71239	65.1909	1.5623	0.023965	depleted
KRAS CDE Neg	TESK1	ATGGCTCCAGAGGTGTTACG	17.9381	30.7806	0.430176	0.619709	24.3594	0.524942	0.0215499		KRAS CDE Pos	B3GAT1	GCACCGAGTACGTGTACACG	214.268	46.6701	2.82442	3.42478	130.469	3.1246	0.023949	depleted
KRAS CDE Pos	MFSD5	GTTCTCCCCCCAGTTTCGAA	460.412	388.887	0	17.9716	424.65	8.98578	0.0211605		KRAS CDE Neg	OR5C1	TGGCTTCATCCAGACAGCCA	214.268	108.275	0	7.70575	161.271	3.85287	0.0238907	depleted
KRAS CDE Neutral	ATP5L2	AGCAGCATTCACCAGTGCTG	516.884	654.651	0	24.7884	585.768	12.3942	0.0211589		KRAS CDE Pos	RXFP3	TCAGAGCCGAGGCCACCGAA	400.681	338.514	17.6526	0	369.597	8.8263	0.0238809	depleted
KRAS CDE Neg	SARNP	CAGGCATATCTTGAAGAACA	237.182	243.242	0.860351	9.29564	240.212	5.07799	0.0211396		KRAS CDE Pos	AGFG1	AAAGCTGGTGGGAAGACTGT	218.553	659.604	2.11831	18.8363	439.079	10.4773	0.023862	depleted
KRAS CDE Neutral	RABL2A	GATGGTCTTGCCATCTACCG	463.734	490.988	0.430176	19.211	477.361	9.82058	0.0205726		KRAS CDE Neutral	GPR139	GAGACCGTGTGGTACTTGAG	531.384	366.516	0	21.4049	448.95	10.7024	0.0238388	depleted
KRAS CDE Neutral	VGLL2	CGCGTAGACTTCGTGCACGG	282.36	250.749	0.860351	9.91535	266.555	5.38785	0.0202129		KRAS CDE Pos	GMPPA	ATCAGTGACATCATCAACTG	319.259	297.444	0	14.5553	308.352	7.27765	0.0236018	depleted
KRAS CDE Pos	TCF12	CCTTATTCTTCATCAAGCCG	281.031	117.867	0	8.05622	199.449	4.02811	0.0201962		KRAS CDE Neutral	ARGFX	TTTCACTCTGTTATCCAAGC	203.554	123.831	0	7.70575	163.693	3.85287	0.0235372	depleted
KRAS CDE Neutral	SZRD1	GCTATCGTCCTGAATCACAA	238.511	284.533	0	10.5351	261.522	5.26753	0.0201418		KRAS CDE Neg	MRPL45	TCAAATATAAGACCGTCCGC	36.4255	0	0	0.856194	18.2128	0.428097	0.0235054	depleted
KRAS CDE Neg	OR5C1	GACCAGGGTATAGAACACAG	77.0676	156.155	3.4414	1.23942	116.611	2.34041	0.0200702		KRAS CDE Neutral	NOSTRIN	CTTTGCATCAGAGAAGGAGG	291.404	235.84	2.11831	10.2743	263.622	6.19632	0.0235046	depleted
KRAS CDE Pos	ASB4	GCACCAGAAGACATTCCACA	27.9038	34.5343	0	1.23942	31.2191	0.619709	0.0198504		KRAS CDE Neg	TTC26	CCTAACCCTGAATATTGGGA	70.7083	75.2945	0	3.42478	73.0014	1.71239	0.0234569	depleted
KRAS CDE Pos	MLYCD	CCGTTCTAGGTTCAGGAACC	6.64376	46.5463	0.430176	0.619709	26.595	0.524942	0.0197384		KRAS CDE Neutral	CA8	GTACGAAGTGAGATTTCACT	98.5631	260.108	0.706104	7.70575	179.336	4.20593	0.0234528	depleted
KRAS CDE Neg	ABCD4	GTATGATGTTCTGTCCCCGG	367.4	569.816	1.7207	16.7321	468.608	9.22643	0.019689		KRAS CDE Pos	PLXNB2	GCTGCAGCTTCGCATCCAGC	122.133	164.901	0.706104	5.99336	143.517	3.34973	0.0233403	depleted
KRAS CDE Neutral	BCAP29	TAAGGCACAAAATGATGTGA	102.314	179.428	4.30176	1.23942	140.871	2.77059	0.0196675		KRAS CDE Neutral	MS4A1	TATTACAAGTTCCTGGAAGA	413.537	174.235	0	13.6991	293.886	6.84956	0.0233069	depleted
KRAS CDE Neg	PREX1	CTGCTTCCGCATGATGTCCG	483.666	456.454	0.430176	17.9716	470.06	9.20087	0.0195738		KRAS CDE Neg	IL11RA	TGGAGTCCCAGCCAGATCAG	164.986	236.462	0.706104	8.56194	200.724	4.63402	0.0230865	depleted
KRAS CDE Neutral	C14orf93	TTAGCTGGTGGATGATTACG	15.945	15.7657	0	0.619709	15.8553	0.309855	0.0195426		KRAS CDE Pos	YWHAQ	TACCTTGCTGAAGTTGCGTG	383.539	311.756	1.41221	14.5553	347.648	7.98376	0.0229651	depleted
KRAS CDE Neg	KBTBD3	CTTGGAGGACAAATTAGTAA	310.264	165.164	0.430176	8.67593	237.714	4.55305	0.0191535		KRAS CDE Neg	ZNF322	GTAATCAGAGAACTCAAAAA	2.14268	28.6243	0.706104	0	15.3835	0.353052	0.02295	depleted
KRAS CDE Neutral	AKAP13	GTGCCCCCTGCGGAGCCCCG	124.238	148.648	0.860351	4.33796	136.443	2.59916	0.0190494		KRAS CDE Neutral	GMPS	GCCTTCATGCCAGAGATCTG	509.957	230.239	0.706104	16.2677	370.098	8.4869	0.0229315	depleted
KRAS CDE Pos	GFI1	AGCTTTGACTGTAAGATCTG	378.03	280.779	0	12.3942	329.404	6.19709	0.018813		KRAS CDE Neutral	RTN4RL2	GGAGCAGGCTGTTCTCCTGG	224.981	279.398	2.11831	9.41814	252.19	5.76823	0.0228726	depleted
KRAS CDE Neutral	SENP8	TGGTCATTGAGCCAGCTTGG	399.954	819.815	0	22.9292	609.885	11.4646	0.018798		KRAS CDE Pos	MLYCD	TCTGCTCCGCCACCTGGCCG	186.413	118.231	3.53052	3.42478	152.322	3.47765	0.0228309	depleted
KRAS CDE Neg	SPINT1	ACGCTGGTACTATGACCCCA	35.2119	43.5433	0.860351	0.619709	39.3776	0.74003	0.0187932		KRAS CDE Pos	C5orf52	TGCTGCGCGGACCTCGGCCG	62.1376	149.967	1.41221	3.42478	106.052	2.41849	0.0228048	depleted
KRAS CDE Pos	CYP1B1	AGTGGCCGAAAGCCATGCTG	43.8488	56.306	0	1.85913	50.0774	0.929564	0.0185625		KRAS CDE Neg	PTH	TCACTCACAGATCTCTTCCT	424.25	676.406	2.82442	22.2611	550.328	12.5427	0.0227914	depleted
KRAS CDE Neg	WASF3	TGTGCTGAGGGAATCACAGG	147.491	126.125	1.29053	3.71826	136.808	2.50439	0.0183058		NTC	NTC	GCCGCGCCATAATATGCCAT	289.261	312.379	0	13.6991	300.82	6.84956	0.0227696	depleted
KRAS CDE Pos	LRP10	GCAGTGCTCTTAGAAGTGCA	262.428	183.182	5.59228	2.47884	222.805	4.03556	0.0181125		KRAS CDE Pos	DRAXIN	GGTCAATGTGATTCTCAGGG	385.682	555.063	0	21.4049	470.373	10.7024	0.0227531	depleted
KRAS CDE Pos	CAPN2	GGCCAAGATATCAAGTCAGA	445.796	542.79	1.7207	16.1124	494.293	8.91657	0.018039		KRAS CDE Neutral	DHX57	ATTCATCCGAGACTGCAGCA	265.692	293.088	0.706104	11.9867	279.39	6.34641	0.0227152	depleted
KRAS CDE Pos	CDK5R2	GCAGCGAGCGGTCCACACCG	44.5132	14.2642	0.430176	0.619709	29.3887	0.524942	0.0178621		KRAS CDE Neg	ITPR2	AACCACTCGGGCAGCAAACA	250.693	314.868	0	12.8429	282.78	6.42146	0.0227083	depleted
KRAS CDE Pos	TARBP1	AGTAGCGGCCCGTCCTCGCG	25.2463	9.7597	0	0.619709	17.503	0.309855	0.017703		KRAS CDE Pos	GH1	GTCATAGACGTTGCTGTCAG	87.8497	118.853	2.11831	2.56858	103.351	2.34345	0.0226745	depleted
KRAS CDE Neutral	SRMS	TTCATAGGGACACTGGCCAT	57.8007	2.25224	0.430176	0.619709	30.0265	0.524942	0.0174827		KRAS CDE Neutral	AFP	GTTGTTCTGTAGGTCAAGAA	366.398	232.728	0.706104	12.8429	299.563	6.77451	0.0226146	depleted
KRAS CDE Pos	DDX60	GCACAGATCTAAGAACACGA	0.664376	24.0239	0.430176	0	12.3441	0.215088	0.0174243		KRAS CDE Neg	PRH2	GATTGCTGTCCTCCCAAAGG	96.4204	148.722	2.11831	3.42478	122.571	2.77154	0.0226117	depleted
KRAS CDE Neg	CDC40	AGCAGGCTATGCTTGTCAGG	296.976	469.216	6.45263	6.8168	383.096	6.63472	0.0173187		KRAS CDE Neutral	ZCCHC6	TACCTAAATGCAATCACCAA	92.1351	288.11	0	8.56194	190.123	4.28097	0.0225169	depleted
KRAS CDE Pos	MAGOHB	GAGTTCGAATTTCGGCCGGA	118.259	240.99	0	6.19709	179.624	3.09855	0.0172502		KRAS CDE Pos	GPR158	TGTTCAGGTAGGATCCAGAT	216.41	278.154	0	11.1305	247.282	5.56526	0.0225057	depleted
KRAS CDE Neg	ARHGEF11	CTCAAGCACCGACCACTCAG	106.3	73.5731	0	3.09855	89.9366	1.54927	0.0172263		KRAS CDE Neutral	APEH	GGAACTGCTTCTCTTCCCCA	57.8523	4.97815	1.41221	0	31.4152	0.706104	0.0224765	depleted
KRAS CDE Neutral	DNAH9	ATGGAGCTACCAAGTCCAGG	49.1638	12.0119	0.430176	0.619709	30.5879	0.524942	0.0171618		KRAS CDE Neutral	ARID3C	CTGGGTGCGTAGAGTGAAGG	74.9937	26.1353	1.41221	0.856194	50.5645	1.1342	0.0224308	depleted
KRAS CDE Neg	GRK7	CAGATAACCTGCAGTTGCCG	49.1638	12.0119	0.430176	0.619709	30.5879	0.524942	0.0171618		KRAS CDE Pos	AGFG1	ATAGATTTCACCCTGTGTGG	2.14268	67.8272	0.706104	0.856194	34.985	0.781149	0.0223281	depleted
KRAS CDE Neg	LTF	CATGGCCCCGAATCATGCCG	0	61.5612	0.430176	0.619709	30.7806	0.524942	0.0170543		KRAS CDE Neg	ZBTB2	GTACTCCTGTGTGGATCTGG	287.119	98.3184	0	8.56194	192.719	4.28097	0.0222136	depleted
KRAS CDE Neutral	ZNF141	CTATACAAATTCTGCTGGTC	51.8213	9.7597	0.430176	0.619709	30.7905	0.524942	0.0170488		KRAS CDE Pos	CDKN1C	CTGGGATTACGACTTCCAGC	10.7134	59.7378	0.706104	0.856194	35.2256	0.781149	0.0221756	depleted
KRAS CDE Pos	LEPROT	CCCCAGTTCGGGAGACATGG	544.124	178.678	7.31299	4.95767	361.401	6.13533	0.0169765		KRAS CDE Pos	PCYOX1	CGTGCTCCGCCAGATAAAAT	197.126	66.5827	0.706104	5.13717	131.854	2.92164	0.022158	depleted
KRAS CDE Neg	RAP1B	GATAGAAGATTCTTATAGAA	1735.35	820.566	21.0786	22.3095	1277.96	21.6941	0.0169756		KRAS CDE Neutral	CSN3	GGGTTTGCATAATATGTGCG	280.691	408.83	0.706104	14.5553	344.76	7.6307	0.0221334	depleted
KRAS CDE Neg	KAT6A	TTTGCAGGAAGACTATCATG	339.496	325.073	0	11.1548	332.285	5.57738	0.016785		KRAS CDE Neg	C10orf99	CCCAACTCAACAAACCTGAA	456.39	472.924	0	20.5487	464.657	10.2743	0.0221117	depleted
KRAS CDE Pos	EID2	AGGCTTCCACGAATCGCCTG	49.8282	24.0239	0	1.23942	36.926	0.619709	0.0167824		KRAS CDE Neg	EXOC3	ACTTCCTTATAATTTCCAGG	728.51	578.709	1.41221	27.3982	653.61	14.4052	0.0220395	depleted
KRAS CDE Neutral	SOHLH2	AGCATAGCAGCTTCTGTTTC	195.327	65.3149	0	4.33796	130.321	2.16898	0.0166434		KRAS CDE Pos	CCDC7	CTACCAGAAGATGAAATGAT	689.942	320.468	0	22.2611	505.205	11.1305	0.0220317	depleted
KRAS CDE Pos	TMEM65	CCCCCCGGCGGCTTGCCGGG	350.126	506.754	0	14.2533	428.44	7.12666	0.016634		KRAS CDE Pos	LGALS2	ATCACAGGCAGCATCGCCGA	32.1401	0	0.706104	0	16.0701	0.353052	0.0219695	depleted
KRAS CDE Pos	SERPINH1	CACAAGATGGTGGACAACCG	23.2532	14.2642	0	0.619709	18.7587	0.309855	0.0165179		KRAS CDE Pos	TRAF3IP1	TTGCAGCAGTCACCCAAACC	32.1401	0	0.706104	0	16.0701	0.353052	0.0219695	depleted
NTC	NTC	AAACTCATACGTAGCGAATC	126.231	167.416	0.430176	4.33796	146.824	2.38407	0.0162376		NTC	NTC	ACGGAACCCGATCGGAACGG	338.543	95.207	0	9.41814	216.875	4.70907	0.0217133	depleted
KRAS CDE Pos	PDZRN3	AAGGATGGGCGCATCCGAGA	83.7114	113.363	0	3.09855	98.537	1.54927	0.0157228		KRAS CDE Neutral	NCALD	CTCTATTGGTGTCCATCTGG	387.824	168.635	0	11.9867	278.23	5.99336	0.0215411	depleted
KRAS CDE Neutral	PCDH18	ATAGATAGGCTGTTGGGTGA	205.957	197.446	2.58105	3.71826	201.701	3.14965	0.0156154		KRAS CDE Neg	POLR1E	ACTTGCTTGACCTACAACAA	359.97	354.071	0.706104	14.5553	357.02	7.6307	0.0213733	depleted
KRAS CDE Pos	GPR141	CCTGGTGGGATAGTAAAGAG	43.1844	12.7627	0.860351	0	27.9736	0.430176	0.0153779		KRAS CDE Pos	CR1	TCTATGCGCTGCACACCCCA	574.237	744.233	0.706104	27.3982	659.235	14.0522	0.0213159	depleted
KRAS CDE Pos	TGOLN2	GGTCCTCCTGAACGTCGCAG	423.207	371.619	0.430176	11.7745	397.413	6.10233	0.0153551		KRAS CDE Neg	C2orf16	GGAACTCGATGTCCTAACCC	186.413	113.875	2.11831	4.28097	150.144	3.19964	0.0213105	depleted
NTC	NTC	TACAGTTATACGTCGCGGTG	168.087	159.909	1.29053	3.71826	163.998	2.50439	0.0152709		KRAS CDE Neg	ZNF266	GGCTGGAACAAGAAGAGTCT	220.696	375.228	0.706104	11.9867	297.962	6.34641	0.0212994	depleted
KRAS CDE Neutral	C2orf71	TGAAGGAGTCAATCAGCGAA	208.614	242.491	0	6.8168	225.553	3.4084	0.0151113		KRAS CDE Pos	PHC2	TCACACCACCACCACTGACT	259.264	252.641	1.41221	9.41814	255.952	5.41517	0.021157	depleted
NTC	NTC	CTTAAGTTCGCGACGGAATG	102.314	78.8284	0.860351	1.85913	90.5711	1.35974	0.0150129		KRAS CDE Neutral	PFKFB2	TGTTAAGGCGTATCTCACTG	280.691	238.329	0.706104	10.2743	259.51	5.49022	0.0211561	depleted
KRAS CDE Neg	MMAA	TGGAGTCCAAGAGAATTAAA	544.788	429.427	0.860351	13.6336	487.108	7.24698	0.0148776		KRAS CDE Pos	CNR2	TACAAAGCTCTGCTCACCCG	274.263	61.6046	2.82442	4.28097	167.934	3.55269	0.0211554	depleted
KRAS CDE Pos	FZD9	TCTGCGCTCCGGCCACCGCA	229.21	361.109	2.58105	6.19709	295.159	4.38907	0.0148702		NTC	NTC	CTTTAGTCACGATATACGTC	53.5669	27.3798	0	1.71239	40.4734	0.856194	0.0211545	depleted
KRAS CDE Neg	PAX1	TACCCGGCCTCCAACCAGCA	71.0882	83.3328	0.430176	1.85913	77.2105	1.14465	0.0148251		KRAS CDE Neg	ID1	GGCCATCTCGCGCTGCGCCG	317.116	249.53	0	11.9867	283.323	5.99336	0.0211538	depleted
KRAS CDE Neg	FABP4	ACGAAGTCACTGCAGATGAC	58.4651	26.2761	0	1.23942	42.3706	0.619709	0.0146259		KRAS CDE Neg	KBTBD3	GCTAACACACAACGATGACA	2.14268	98.3184	2.11831	0	50.2305	1.05916	0.0210859	depleted
KRAS CDE Neutral	AFP	AGATTGCTAAAGGTCCCTTG	471.043	419.667	8.60351	4.33796	445.355	6.47074	0.0145294		KRAS CDE Neg	GABPA	ATAGACATCAATGAACCAAT	482.102	513.371	2.11831	18.8363	497.737	10.4773	0.0210499	depleted
KRAS CDE Neutral	CA8	GTGACACCTTCACTGCAAGG	17.9381	25.5254	0	0.619709	21.7318	0.309855	0.0142581		KRAS CDE Neg	SLC5A8	GGGCGCGGTAGTGGCAACGG	40.7109	0	0	0.856194	20.3554	0.428097	0.0210311	depleted
KRAS CDE Pos	PRMT8	GGACATTTACACAGTGAAGA	95.0058	54.0537	0.860351	1.23942	74.5297	1.04988	0.0140868		KRAS CDE Neutral	CXCR5	CCAGGTCCTCCAGGTTCTCG	205.697	438.699	0.706104	12.8429	322.198	6.77451	0.0210259	depleted
KRAS CDE Pos	ROBO3	GTCGGGGTCGGCCTTCAGCG	61.1226	14.2642	0.430176	0.619709	37.6934	0.524942	0.0139266		KRAS CDE Pos	SNRPF	AATACAGAAGAATACATAGA	329.972	489.725	3.53052	13.6991	409.849	8.61482	0.0210195	depleted
NTC	NTC	TCGCTAAGCCGGGTAATACT	75.7389	147.146	0	3.09855	111.443	1.54927	0.013902		KRAS CDE Neutral	IQSEC3	GTAAGCGCCACTCTCCCGCA	259.264	270.687	0	11.1305	264.975	5.56526	0.021003	depleted
KRAS CDE Neutral	APEH	CTGGGTACTGACCAATCAAG	30.5613	31.5313	0.860351	0	31.0463	0.430176	0.0138559		KRAS CDE Neg	SARNP	CAGGCATATCTTGAAGAACA	98.5631	110.764	3.53052	0.856194	104.663	2.19336	0.0209563	depleted
KRAS CDE Neg	CINP	GGTGTGTCTGGAATATAACG	257.113	463.21	0	9.91535	360.162	4.95767	0.0137651		KRAS CDE Neutral	C3orf38	TTTAAGTACTTGGCAACACA	224.981	428.743	0	13.6991	326.862	6.84956	0.0209555	depleted
KRAS CDE Neutral	SLC27A3	CATGGAAGCGGAGAAAACCT	306.277	256.755	0.860351	6.8168	281.516	3.83858	0.0136354		KRAS CDE Pos	C10orf53	CATCTATGGCCAACACAGCT	449.962	244.551	8.47325	5.99336	347.257	7.2333	0.0208298	depleted
KRAS CDE Neutral	MS4A1	ATGGGTGCATAGATCCCTGC	247.148	89.3388	0.860351	3.71826	168.243	2.2893	0.0136071		NTC	NTC	TCGTGCCGGAATAACCACTA	49.2816	59.7378	1.41221	0.856194	54.5097	1.1342	0.0208073	depleted
NTC	NTC	GAGGCGTACTTCGGCTCTAA	73.7457	36.0358	0.860351	0.619709	54.8908	0.74003	0.0134819		KRAS CDE Pos	CNR2	GCTGCATGCAAAGACCACAC	229.266	101.43	0	6.84956	165.348	3.42478	0.0207125	depleted
KRAS CDE Neutral	C14orf93	CCACTGCCTTATCGACCCGC	110.286	46.5463	0.860351	1.23942	78.4163	1.04988	0.0133886		KRAS CDE Neg	AP4E1	TGGTCAGTCACTAATAAGAG	561.381	472.924	0	21.4049	517.153	10.7024	0.0206949	depleted
KRAS CDE Neg	SLC7A6	GGGATCTTTGTCTCACCCAA	368.729	345.343	0.860351	8.67593	357.036	4.76814	0.0133548		KRAS CDE Pos	TARBP1	TCAGTGTCTCTGCAGAACAG	272.12	3.73361	1.41221	4.28097	137.927	2.84659	0.0206384	depleted
KRAS CDE Neg	CPAMD8	GCCTCCAGCATAGGACAAGA	296.312	158.407	0.430176	5.57738	227.36	3.00378	0.0132116		KRAS CDE Neutral	UBTD2	GGGCAGCCTCAACGAGAACT	68.5656	166.146	1.41221	3.42478	117.356	2.41849	0.0206082	depleted
KRAS CDE Neutral	RPSA	CTAAGTGGGTTCCTGCTGCA	49.1638	45.0448	0	1.23942	47.1043	0.619709	0.0131561		KRAS CDE Neutral	SPATA13	TTACTCTGACGAAGCTCGCG	252.836	365.271	0.706104	11.9867	309.054	6.34641	0.020535	depleted
KRAS CDE Pos	EN1	GCGCGACTCGGCCCTCGGCG	29.2325	18.0179	0	0.619709	23.6252	0.309855	0.0131154		KRAS CDE Neutral	TEX29	TGGAAGTGAAGAACTCTCCG	353.542	273.176	0	12.8429	313.359	6.42146	0.0204924	depleted
KRAS CDE Neg	SLC1A3	CCTTGAAGAGGTCCCCAGAG	56.472	38.2881	0	1.23942	47.38	0.619709	0.0130796		KRAS CDE Neg	PRH2	GCTGGCCTTCAGCTCAGCTC	57.8523	52.8928	1.41221	0.856194	55.3725	1.1342	0.0204831	depleted
KRAS CDE Neutral	POGK	ACCGGCCCTATTTGATGAGG	246.483	228.978	0	6.19709	237.731	3.09855	0.0130339		KRAS CDE Pos	TMEM65	CACCAAAGCAAGTTGACATG	209.982	159.301	0.706104	6.84956	184.641	3.77783	0.0204604	depleted
KRAS CDE Neutral	RFWD3	ATGTATGACAGGGAGACCAG	35.2119	60.0597	0	1.23942	47.6358	0.619709	0.0130093		KRAS CDE Neutral	C2orf71	AGAACGAACATTTCAGTACC	235.694	275.043	3.53052	6.84956	255.368	5.19004	0.0203237	depleted
KRAS CDE Pos	PCYOX1	CGTGCTCCGCCAGATAAAAT	304.284	253.752	0.430176	6.8168	279.018	3.62349	0.0129866		KRAS CDE Neg	WDR46	GTAATACTCCAGAGGTTCCA	227.124	532.039	0	15.4115	379.582	7.70575	0.0203006	depleted
KRAS CDE Neutral	SLC27A3	TGGACTGACAGAGGGCAACG	126.896	49.5493	0.430176	1.85913	88.2225	1.14465	0.0129746		KRAS CDE Pos	SLC26A9	ATCGTGGGAGAAATCCAACG	79.279	117.609	1.41221	2.56858	98.4439	1.9904	0.0202186	depleted
KRAS CDE Neg	SPG21	TGTCACTGAAGGAATTGCAG	253.792	233.482	2.58105	3.71826	243.637	3.14965	0.0129277		KRAS CDE Pos	CNR2	GCAGAGGTATCGGTCAATGG	216.41	285.621	0.706104	9.41814	251.016	5.06212	0.0201666	depleted
KRAS CDE Neg	MAP2K1	AAAAGGCCTGACATATCTGA	89.0264	111.11	2.58105	0	100.068	1.29053	0.0128964		KRAS CDE Pos	GPR158	GCAGGCCCGCCAACTCGTAG	205.697	261.353	0	9.41814	233.525	4.70907	0.0201652	depleted
KRAS CDE Neutral	ADSL	CGTATTCAATATAGTATCTG	168.751	302.551	0.430176	5.57738	235.651	3.00378	0.0127467		KRAS CDE Pos	JAM3	TTCAAATTCCTGTACCACTG	188.556	309.267	1.41221	8.56194	248.911	4.98708	0.0200355	depleted
KRAS CDE Neutral	INS	GCACAGGTGTTGGTTCACAA	154.8	159.158	0.860351	3.09855	156.979	1.97945	0.0126096		KRAS CDE Neg	RAF1	ATCCAGAGGACAGAGCCAGT	282.833	359.671	0	12.8429	321.252	6.42146	0.0199888	depleted
KRAS CDE Neutral	UGT2B4	TTACCAAATGTTGAGTTCGT	66.4376	81.8313	0	1.85913	74.1345	0.929564	0.0125389		KRAS CDE Neutral	GOLGB1	ACTCCTATCATTGGCTCCTG	231.409	111.386	0	6.84956	171.398	3.42478	0.0199815	depleted
KRAS CDE Neg	RCBTB2	ATAGGTATTCCAGGAAGGCC	47.8351	51.0507	0	1.23942	49.4429	0.619709	0.0125338		KRAS CDE Pos	EN1	GTGGACAGGGTCTCTACCTG	70.7083	121.965	2.11831	1.71239	96.3365	1.91535	0.0198819	depleted
KRAS CDE Neutral	AKAP13	GTGTGTGTCTTCCTGAGCCA	158.121	142.642	1.29053	2.47884	150.382	1.88468	0.0125327		KRAS CDE Pos	DEF6	GCTGGATGCACACTGCTGCG	259.264	98.3184	2.82442	4.28097	178.791	3.55269	0.0198706	depleted
KRAS CDE Neg	OR1A1	ACAAAGAGACAACCGTGAGG	43.1844	90.0895	0.430176	1.23942	66.637	0.834797	0.0125275		KRAS CDE Neg	SCN5A	AGTCAACTTTGACAACGTGG	134.989	152.456	1.41221	4.28097	143.722	2.84659	0.0198062	depleted
NTC	NTC	GATTCATTATCGGCATACGG	88.362	96.0955	0.430176	1.85913	92.2288	1.14465	0.012411		KRAS CDE Neutral	TEX29	AATTGCTTCAGGAGGTGCCG	212.125	220.283	0	8.56194	216.204	4.28097	0.0198006	depleted
KRAS CDE Neg	EXOC3	CGGATACTGCGACACCATCG	424.536	328.827	5.59228	3.71826	376.682	4.65527	0.0123586		KRAS CDE Pos	FEZ2	GAAAGCCGATCTGACTGTGT	359.97	205.349	4.23662	6.84956	282.659	5.54309	0.0196105	depleted
KRAS CDE Neutral	SPATA13	TTACTCTGACGAAGCTCGCG	211.936	481.228	0.430176	8.05622	346.582	4.2432	0.012243		NTC	NTC	CGGGCAATATGATCGTAGGC	122.133	142.499	0	5.13717	132.316	2.56858	0.0194125	depleted
KRAS CDE Neg	HSD17B4	TCTGAGGGTCAAGCTTGCCC	170.745	183.933	0	4.33796	177.339	2.16898	0.0122307		KRAS CDE Neg	RCBTB2	GCAAAGCTGCCACTCTGCAA	100.706	52.8928	2.11831	0.856194	76.7993	1.48725	0.0193655	depleted
KRAS CDE Neg	NCR2	CAGGTCGCGGGGAGTCCAGG	441.81	319.067	4.30176	4.95767	380.439	4.62972	0.0121694		KRAS CDE Neutral	PCDH9	CCCTCCCCTCCAAAGCCAAG	407.109	425.631	0.706104	15.4115	416.37	8.0588	0.0193549	depleted
KRAS CDE Neutral	ZNF195	GGCCATAGAATTCTCCCTGG	191.34	216.215	0	4.95767	203.778	2.47884	0.0121644		KRAS CDE Neg	ASPSCR1	TCTGGTGCACTTGGGAGCCG	124.275	362.782	0	9.41814	243.529	4.70907	0.0193368	depleted
KRAS CDE Neg	LSM1	AATGTCCTCGATGAGGCTGG	205.292	225.224	0.860351	4.33796	215.258	2.59916	0.0120746		KRAS CDE Pos	DEPDC1B	CACAAGAGAACATCCCAGTG	267.835	352.826	0	11.9867	310.33	5.99336	0.0193128	depleted
KRAS CDE Neutral	ZCCHC6	TTGACTGTTGATCAGAAACG	20.5957	67.5672	0.430176	0.619709	44.0814	0.524942	0.0119085		KRAS CDE Pos	DEF6	GCTGTCCCACAACCTGTACA	246.408	181.702	1.41221	6.84956	214.055	4.13088	0.0192982	depleted
KRAS CDE Pos	KIF17	TCAGCGTGTAGCCGACCGAA	160.779	208.707	1.29053	3.09855	184.743	2.19454	0.0118788		KRAS CDE Neg	TGM3	AGACACCTACCATTCAGCCA	347.114	370.872	3.53052	10.2743	358.993	6.90243	0.0192272	depleted
KRAS CDE Pos	RCN2	CCGCAGCGACTACGACCGCG	2.6575	70.5701	0.860351	0	36.6138	0.430176	0.011749		KRAS CDE Neg	POLR1E	CTTCAACGCTTCTATGACAA	87.8497	224.639	0	5.99336	156.244	2.99668	0.0191795	depleted
KRAS CDE Pos	MXRA8	TTTGTAATCTGTGGGAGGAG	63.7801	26.2761	0.430176	0.619709	45.0281	0.524942	0.0116581		KRAS CDE Neg	DNAJC22	CCGCCAGCATTACAGCTCAG	2.14268	71.5608	1.41221	0	36.8518	0.706104	0.0191607	depleted
KRAS CDE Neutral	COMMD7	AATCATCAGAGTCTGACCTA	42.5201	64.5642	0	1.23942	53.5421	0.619709	0.0115742		KRAS CDE Neutral	ACOX3	TCTGCTCCCAGAATTCCCCA	325.687	434.343	0	14.5553	380.015	7.27765	0.019151	depleted
KRAS CDE Pos	ICA1L	ATACCTTGATGACAATTAAT	32.5544	21.0209	0	0.619709	26.7877	0.309855	0.0115671		KRAS CDE Pos	PAPOLG	ATTCTGTTGTGGGTAGGCAG	557.096	250.774	0	15.4115	403.935	7.70575	0.0190767	depleted
KRAS CDE Neutral	RAB5I	CCGTCTGGAGTAAGGTGCTG	173.402	338.587	3.4414	2.47884	255.994	2.96012	0.0115632		KRAS CDE Neutral	PCDH9	GGTCCCATTTCATTTGAAGG	672.8	861.842	3.53052	25.6858	767.321	14.6082	0.0190379	depleted
KRAS CDE Pos	IL36RN	ATAACCAGCTTCTAGCTGGA	74.4101	0	0.860351	0	37.2051	0.430176	0.0115623		KRAS CDE Pos	SLC39A9	TATGTTGGTGGGATGTTACG	314.973	265.086	0.706104	10.2743	290.03	5.49022	0.0189298	depleted
KRAS CDE Neg	SEMA5B	TGGAGTAAGTGCACTGACGA	203.963	102.852	0.430176	3.09855	153.408	1.76436	0.0115011		KRAS CDE Neg	BICD1	CAGCCCTAAAGTAAGTGGGG	0	37.3361	0.706104	0	18.668	0.353052	0.0189121	depleted
KRAS CDE Neg	FAR2	AGTTATCTATCCGTGCCCTG	237.182	291.29	1.7207	4.33796	264.236	3.02933	0.0114645		KRAS CDE Neutral	ARGFX	AAGATTTCTATCTGGGAACA	488.53	365.271	0.706104	15.4115	426.901	8.0588	0.0188775	depleted
KRAS CDE Pos	PRSS16	GGGCCGCGCTGAAAACCAGG	147.491	231.23	0	4.33796	189.361	2.16898	0.0114542		KRAS CDE Neg	TAF6	GAGCATCCACGAGTTGTCTG	109.277	154.945	0.706104	4.28097	132.111	2.49354	0.0188746	depleted
KRAS CDE Neutral	AKAP13	GCGTTTGGCTGCAATGAGCT	120.252	122.372	2.15088	0.619709	121.312	1.38529	0.0114193		KRAS CDE Pos	PRSS16	GGGCCGCGCTGAAAACCAGG	38.5682	6.84495	0	0.856194	22.7066	0.428097	0.0188535	depleted
KRAS CDE Neg	POFUT1	TGACCCGATGGTAAGCCTGG	526.186	381.379	6.02246	4.33796	453.782	5.18021	0.0114156		KRAS CDE Neg	GABPA	GACCAAGGAGTAAAAACAGA	257.121	277.532	4.94273	5.13717	267.326	5.03995	0.0188532	depleted
KRAS CDE Pos	OCEL1	CCTGGAACACTGCGACATAG	25.9107	28.5284	0	0.619709	27.2195	0.309855	0.0113835		KRAS CDE Neutral	RBCK1	CCTGGCTCCAGAGGGCCCCG	134.989	113.875	2.11831	2.56858	124.432	2.34345	0.0188332	depleted
KRAS CDE Neg	SPACA7	AATACCATTCAGTTCAAAAC	83.047	160.66	2.15088	0.619709	121.853	1.38529	0.0113685		NTC	NTC	TAGGCGGACGGTTACATATA	353.542	396.385	2.11831	11.9867	374.963	7.05252	0.0188086	depleted
KRAS CDE Neutral	ALOX15B	GCTCCAGCAACAGCGCCAGG	144.834	174.924	1.7207	1.85913	159.879	1.78992	0.0111954		KRAS CDE Neg	GRB10	CACAGGATCATTAAACAGCA	477.817	159.923	0	11.9867	318.87	5.99336	0.0187956	depleted
KRAS CDE Neutral	SDHD	ATATGAGCAGGTCTGACCAC	18.6025	36.7866	0	0.619709	27.6945	0.309855	0.0111883		KRAS CDE Neutral	TSPAN8	GTACCCATATTGCTAATGCT	218.553	243.307	3.53052	5.13717	230.93	4.33384	0.0187669	depleted
KRAS CDE Neutral	RP1	AGCTCAGGATCACTGCCTGG	35.2119	76.5761	0	1.23942	55.894	0.619709	0.0110872		KRAS CDE Pos	ZBTB4	TTGAAGCAGCCAGGACGCTG	417.822	536.395	0.706104	17.1239	477.109	8.915	0.0186855	depleted
KRAS CDE Neutral	SLC22A8	TATCCGGAACAGGTCACTTG	139.519	105.855	0.860351	1.85913	122.687	1.35974	0.011083		KRAS CDE Neutral	DNAH9	TGGCAGTCAGGAACGACTGG	119.99	85.2507	2.11831	1.71239	102.62	1.91535	0.0186644	depleted
KRAS CDE Neg	BCAR1	CATGGACACACGCAGCTGGG	209.943	203.452	0.860351	3.71826	206.698	2.2893	0.0110756		KRAS CDE Pos	SPSB4	TGGCCACACCAACTACAGCG	0	37.9584	0.706104	0	18.9792	0.353052	0.0186021	depleted
KRAS CDE Neg	EIF3H	GCTCCACCGCCGGCGCAGCA	67.102	45.0448	0	1.23942	56.0734	0.619709	0.0110518		KRAS CDE Pos	PBXIP1	TTAGAATGCTGCCAGACTGA	687.799	685.74	0.706104	24.8296	686.769	12.7679	0.0185912	depleted
KRAS CDE Neg	SPG21	TCAGCCATCATAGGGTCCAC	50.4926	102.101	0.430176	1.23942	76.297	0.834797	0.0109414		KRAS CDE Neg	CCR2	GTAATCATAATCAAAAAAGG	235.694	317.357	0	10.2743	276.526	5.13717	0.0185775	depleted
NTC	NTC	GTTTCCCGGGACTGTCGCGT	4.65063	108.858	0	1.23942	56.7544	0.619709	0.0109191		KRAS CDE Pos	FEM1B	AGACCGGTTGAGAAGCAAGG	49.2816	42.9365	0	1.71239	46.109	0.856194	0.0185689	depleted
KRAS CDE Neutral	MYH6	GGATGAGGAGGAGATGAACG	30.5613	27.0269	0	0.619709	28.7941	0.309855	0.0107611		KRAS CDE Neg	NOS1AP	GACAGGACAGAGAGAAGAGA	0	130.676	0.706104	1.71239	65.3382	1.20925	0.0185075	depleted
NTC	NTC	AGCTTAGATCGTGCGTCGTA	83.7114	129.128	0.430176	1.85913	106.42	1.14465	0.010756		KRAS CDE Neg	TCF7L2	ATAGAGATATACTCACGCCA	239.98	128.187	4.23662	2.56858	184.084	3.4026	0.018484	depleted
KRAS CDE Neg	PKIG	TGTCAGGGACCGCATTCCGA	187.354	165.915	1.29053	2.47884	176.634	1.88468	0.01067		KRAS CDE Pos	MAP2K2	CCACCTCCTAAGCTGCCCAA	299.975	212.193	0	9.41814	256.084	4.70907	0.0183888	depleted
KRAS CDE Neg	DCAF6	GTGGCTTCTGTTTGGAACTG	140.848	33.7836	0	1.85913	87.3156	0.929564	0.010646		KRAS CDE Neg	CPD	ATAGGACAAACAAATGCTCG	329.972	454.256	0.706104	13.6991	392.114	7.20261	0.0183687	depleted
KRAS CDE Neg	TRIM49C	CTGGCTATTCCTGAGCTCTG	0	40.5403	0.430176	0	20.2701	0.215088	0.0106111		KRAS CDE Neutral	NUDT5	GTGCTCCTGGCAGATAATTG	460.675	510.882	0.706104	17.1239	485.779	8.915	0.018352	depleted
KRAS CDE Neg	IGSF10	CAGGTCACCCCGAAAGACCA	382.016	226.725	0.860351	5.57738	304.371	3.21887	0.0105755		KRAS CDE Neg	DCAF6	GGACGGGTCCTCCAGCCCGA	23.5694	209.704	0	4.28097	116.637	2.14049	0.0183517	depleted
KRAS CDE Pos	C10orf53	GTTGGCCATAGATGGACATG	15.2806	84.8343	0.430176	0.619709	50.0575	0.524942	0.0104868		KRAS CDE Pos	INPP5F	CATCTCTGCAATGCACTGAA	353.542	114.497	0	8.56194	234.019	4.28097	0.0182932	depleted
KRAS CDE Neutral	WFDC12	TGGTCTGTGTGACACTGGGG	24.5819	93.8433	0	1.23942	59.2126	0.619709	0.0104658		KRAS CDE Pos	YIPF5	AGGTGTTTCATTTGGTTGTG	141.417	365.894	0.706104	8.56194	253.655	4.63402	0.018269	depleted
KRAS CDE Neg	CPAMD8	CAAGATGGCATATTCAGCCA	171.409	244.743	0	4.33796	208.076	2.16898	0.010424		KRAS CDE Pos	TNFSF18	GAGCTCCTTGAGTTCTTGAA	366.398	359.671	2.11831	11.1305	363.034	6.62442	0.0182474	depleted
KRAS CDE Neutral	AFP	AATTGTAGGTGCATACAGGA	79.7251	181.681	0.860351	1.85913	130.703	1.35974	0.0104033		KRAS CDE Neg	LTF	GTAATGCCTGCGACATACTG	23.5694	70.3163	0	1.71239	46.9429	0.856194	0.0182391	depleted
KRAS CDE Neg	ZMYND15	GCAAAGGTGAAGCCTGGCCG	50.4926	32.2821	0.860351	0	41.3873	0.430176	0.0103939		KRAS CDE Pos	CAPN2	TGTCTTTCAGTGACTTCCTG	295.689	116.364	4.94273	2.56858	206.027	3.75566	0.018229	depleted
KRAS CDE Neg	NDRG4	ACTACATGCAGAAGGCCGTA	110.286	51.0507	0.430176	1.23942	80.6686	0.834797	0.0103485		KRAS CDE Neg	CCNT2	CAAGAGCTAGAAGGACCCAG	475.674	317.357	0.706104	13.6991	396.515	7.20261	0.0181648	depleted
KRAS CDE Neg	NDRG4	AACTAGCACTTTACCCGACA	184.032	261.26	0.860351	3.71826	222.646	2.2893	0.0102823		KRAS CDE Neg	C10orf99	AGAGAAGCAGGATACAGAGC	439.249	281.265	7.06104	5.99336	360.257	6.5272	0.0181182	depleted
KRAS CDE Neg	OR2T5	AAAGTTGGATTTCATCCTCA	126.231	60.8104	1.29053	0.619709	93.5209	0.955118	0.0102129		KRAS CDE Neutral	MYH6	CTTGAGGTTGAAAAGCACCG	321.401	151.211	0	8.56194	236.306	4.28097	0.0181162	depleted
KRAS CDE Pos	SLC6A4	GGTCCGTGAAGGAGGAGATG	88.362	167.416	2.58105	0	127.889	1.29053	0.010091		KRAS CDE Neg	TGM3	GCACGCTTGTACATGAAGTG	107.134	129.432	0	4.28097	118.283	2.14049	0.0180963	depleted
KRAS CDE Pos	ZNF799	AGACACATGACAATGCACAC	59.7938	2.25224	0	0.619709	31.023	0.309855	0.00998789		KRAS CDE Neutral	ELF2	CTGAGTCCATTTAATATACC	242.122	320.468	0.706104	9.41814	281.295	5.06212	0.0179958	depleted
KRAS CDE Pos	PBXIP1	GGGACCAGACACACAGGACC	82.3826	42.0418	0	1.23942	62.2122	0.619709	0.00996122		KRAS CDE Pos	CR1	GCCCGGCTACGACCTCAGAG	445.677	172.991	0	11.1305	309.334	5.56526	0.0179911	depleted
KRAS CDE Pos	TSC22D4	CAGCCTGGCCCACTCCATGT	79.7251	69.0687	0.860351	0.619709	74.3969	0.74003	0.00994706		KRAS CDE Pos	CREM	TTTGCCACAGGGAGTGGTGA	14.9987	24.2685	0.706104	0	19.6336	0.353052	0.017982	depleted
KRAS CDE Pos	ZNF799	ATGCATGAGAGAACGCACAC	121.581	90.0895	0.860351	1.23942	105.835	1.04988	0.00992		KRAS CDE Neg	SLC5A8	CTTTGTGGTGGTCATCAGCG	74.9937	138.144	2.11831	1.71239	106.569	1.91535	0.0179729	depleted
KRAS CDE Neutral	APEH	AGTGGAACAGGTGCTCCAGG	57.1363	48.7985	0.430176	0.619709	52.9674	0.524942	0.00991067		KRAS CDE Neg	CDC40	CGATTTAGTCAAGTGCATGA	55.7096	39.8252	0	1.71239	47.7674	0.856194	0.0179242	depleted
KRAS CDE Neutral	POLR1D	CAAAGAACTTACCAACCCAT	35.8763	70.5701	0.430176	0.619709	53.2232	0.524942	0.00986303		KRAS CDE Neg	CDV3	CCAGAACCAGCGATGACTAG	295.689	242.062	7.06104	2.56858	268.876	4.81481	0.0179072	depleted
KRAS CDE Pos	ARHGEF1	TGGAGGACTTCCGTTCCAAG	104.307	45.7955	0.860351	0.619709	75.0513	0.74003	0.00986033		KRAS CDE Neg	NR1H2	GGACCCTCCTCCTTTACAGT	437.106	313.001	1.41221	11.9867	375.053	6.69947	0.0178627	depleted
KRAS CDE Pos	CNR2	GCTGTCTTCCTGCTGAAGAT	112.28	81.8313	1.29053	0.619709	97.0554	0.955118	0.00984095		KRAS CDE Neutral	CYP1A2	ACTCATGAGTGTTCTTCACG	649.231	685.117	0.706104	23.1172	667.174	11.9117	0.0178539	depleted
KRAS CDE Pos	C6orf223	CGCTGGCCCGGATGTCGCGG	43.8488	0	0.430176	0	21.9244	0.215088	0.00981043		KRAS CDE Pos	B3GAT1	CACGCTGCCCACCATCCACG	443.534	416.297	0.706104	14.5553	429.916	7.6307	0.0177493	depleted
KRAS CDE Pos	LBH	GATCGGCCTCAGCCCCCGCA	556.083	321.319	8.60351	0	438.701	4.30176	0.00980567		KRAS CDE Pos	TCF12	TAGACTAAGGATGACTGCCA	0	119.476	2.11831	0	59.7378	1.05916	0.0177301	depleted
KRAS CDE Neg	OR5T2	GTTACCTTATTTGTACTGAA	176.724	271.019	1.29053	3.09855	223.872	2.19454	0.00980265		KRAS CDE Neg	PAX1	TTTCTCTAGCCCATTCACTG	0	39.8252	0.706104	0	19.9126	0.353052	0.0177301	depleted
KRAS CDE Pos	HOXD1	CCACTCGAACGTGCTGAAGG	230.538	195.945	0.430176	3.71826	213.242	2.07422	0.00972707		KRAS CDE Pos	COX8A	TGTGACAGGATCCAGCCCGC	59.9949	164.901	1.41221	2.56858	112.448	1.9904	0.0177006	depleted
KRAS CDE Pos	B3GAT1	CAGGTGCGTGTAGTTGAGGC	75.7389	97.597	0.430176	1.23942	86.6679	0.834797	0.00963213		KRAS CDE Neg	YWHAZ	AGGAGCTGAATTATCCAATG	259.264	323.579	0	10.2743	291.422	5.13717	0.0176279	depleted
KRAS CDE Pos	DEGS1	TCTGGAAGTTATCAATACCG	138.19	294.293	0.430176	3.71826	216.241	2.07422	0.00959213		KRAS CDE Neg	RIN2	ATAGTCTCCACACAAGCCCT	207.84	228.372	4.23662	3.42478	218.106	3.8307	0.0175635	depleted
KRAS CDE Neg	C10orf99	GGAAAGGACTAGAAGCCTCA	473.7	123.873	3.87158	1.85913	298.787	2.86535	0.00958997		KRAS CDE Pos	PDZD8	CTGCAATTGCAGATCTTCAG	32.1401	8.08949	0.706104	0	20.1148	0.353052	0.0175518	depleted
KRAS CDE Neutral	ZNF705A	CTAATTGCTTTCGCCTTAGA	53.1501	101.351	0.860351	0.619709	77.2504	0.74003	0.00957963		NTC	NTC	CCTTGTGGCGTGCCAAACGA	353.542	428.121	0	13.6991	390.831	6.84956	0.0175256	depleted
KRAS CDE Neg	CPEB1	TCAGACCCAAGGGGATCCAG	174.066	253.001	2.15088	1.85913	213.534	2.005	0.00938962		KRAS CDE Neg	BZW1	AACACTCTTTGACATTCTGG	122.133	309.89	0.706104	6.84956	216.011	3.77783	0.0174891	depleted
NTC	NTC	GTGGTTACGTTAACGACTAC	180.71	223.722	1.29053	2.47884	202.216	1.88468	0.00932013		KRAS CDE Pos	GPR158	ACGCCACTCTGGAGACCGAG	29.9975	51.026	1.41221	0	40.5117	0.706104	0.0174296	depleted
KRAS CDE Pos	SERPINH1	GAAATTCCACCACAAGATGG	17.9381	48.7985	0	0.619709	33.3683	0.309855	0.00928589		KRAS CDE Neg	LENG8	GCCACAGGGCGCACGGTGGA	89.9924	130.054	2.11831	1.71239	110.023	1.91535	0.0174086	depleted
KRAS CDE Neutral	CORT	AGCAGGAGGCCGGGGGACAA	63.7801	69.8194	0	1.23942	66.7997	0.619709	0.00927712		NTC	NTC	CGCGTATATGTCACACGGCA	713.511	294.333	2.11831	15.4115	503.922	8.76491	0.0173934	depleted
KRAS CDE Neg	EXOSC8	GGGAAAGCTCCAATCCCAGG	87.6976	159.158	0.430176	1.85913	123.428	1.14465	0.00927385		KRAS CDE Neg	SLC1A3	AGTCCCATCCATGTTAATGG	529.241	519.594	2.82442	15.4115	524.418	9.11796	0.0173868	depleted
KRAS CDE Neg	RAF1	ATTGTATGAACTGATGACGG	342.818	322.821	4.30176	1.85913	332.819	3.08044	0.0092556		KRAS CDE Pos	HOXA4	TACCCCTATGGCTACCGCGG	602.092	711.875	1.41221	21.4049	656.983	11.4085	0.017365	depleted
KRAS CDE Pos	PBXIP1	TTAGAATGCTGCCAGACTGA	342.154	454.952	3.01123	4.33796	398.553	3.6746	0.00921985		KRAS CDE Neg	OR1A1	AGTGATCACTGTAATGTACA	23.5694	66.5827	0.706104	0.856194	45.0761	0.781149	0.0173296	depleted
KRAS CDE Neg	EXOC5	TTATATAAAGCAGTGCCAGG	179.381	90.0895	0	2.47884	134.736	1.23942	0.0091989		KRAS CDE Pos	GPN3	TCTTCATCTGACTGATCGTA	404.966	385.806	0	13.6991	395.386	6.84956	0.0173237	depleted
KRAS CDE Neutral	TLE4	AGATGTAGTTGGTATTTGTC	100.985	107.357	1.29053	0.619709	104.171	0.955118	0.00916876		KRAS CDE Neutral	IQSEC3	GCCCCAACATCAAGCCTGAC	454.247	427.498	0.706104	14.5553	440.873	7.6307	0.0173082	depleted
KRAS CDE Pos	SCLY	GATGCCCGGCAGCAGTGGGG	150.149	32.2821	0.430176	1.23942	91.2155	0.834797	0.00915192		KRAS CDE Neutral	DDX52	TTGCATATGATGTTGAACAG	254.979	255.752	2.82442	5.99336	255.365	4.40889	0.017265	depleted
KRAS CDE Neutral	CORT	GGCCGGTGGGGCCACCCTCC	208.614	344.593	2.58105	2.47884	276.603	2.52995	0.00914648		KRAS CDE Neg	UROC1	ATTGGTGATGACGAGCCGTG	400.681	237.084	0.706104	10.2743	318.882	5.49022	0.0172171	depleted
KRAS CDE Neg	C2orf16	GGATCTCTCTGCAAATCCAG	119.588	63.0627	0.430176	1.23942	91.3252	0.834797	0.00914093		KRAS CDE Neutral	VPS26A	TGCTTGTTGATGAGGAAGAC	458.533	337.892	0	13.6991	398.212	6.84956	0.0172008	depleted
KRAS CDE Pos	MLYCD	CGAGCTGCGCGAGAAGACAC	57.1363	57.8075	0.430176	0.619709	57.4719	0.524942	0.0091339		KRAS CDE Pos	SLC24A2	GGTGATAAGATCAGGGATGG	92.1351	139.388	1.41221	2.56858	115.762	1.9904	0.0171939	depleted
KRAS CDE Pos	UBALD2	AGCGCATCGGGGAAGTTGGG	172.073	216.966	0.430176	3.09855	194.52	1.76436	0.00907035		KRAS CDE Pos	DEF6	TGCAACTAGAGGTGAAAGCT	261.407	342.87	0	10.2743	302.138	5.13717	0.0170027	depleted
KRAS CDE Pos	BTNL9	GCAGACACAATACCTGAGCT	88.362	48.7985	0	1.23942	68.5803	0.619709	0.00903626		KRAS CDE Neutral	GOLGB1	GTTCTCACGAAGACTCTGAC	467.103	532.039	0.706104	16.2677	499.571	8.4869	0.0169884	depleted
KRAS CDE Pos	CRYAA	CGATGTGAAGCACTTCTCCC	46.5063	22.5224	0	0.619709	34.5144	0.309855	0.00897756		KRAS CDE Pos	ADPRHL2	GGCTAGCAGGGACTGCACCA	55.7096	170.501	2.11831	1.71239	113.106	1.91535	0.0169342	depleted
KRAS CDE Neutral	RBCK1	TGACCCAGCAGATCTCGGTG	67.7663	70.5701	0	1.23942	69.1682	0.619709	0.00895945		KRAS CDE Neutral	SMOX	GGTTGTTCAGTGGAGATGCA	422.107	461.723	2.11831	12.8429	441.915	7.48061	0.0169277	depleted
KRAS CDE Neutral	ADRB1	GAACACCCGCAGGTACACGA	27.2394	42.7925	0	0.619709	35.016	0.309855	0.00884895		KRAS CDE Neg	HSP90B1	TATTTACCTCACAGAACCTG	327.83	178.591	0	8.56194	253.21	4.28097	0.0169068	depleted
KRAS CDE Pos	TWIST1	GACCGGCAGCAGCCGCCGAG	0	48.7985	0.430176	0	24.3993	0.215088	0.00881534		KRAS CDE Pos	FEM1B	GGGGGTTGAATTAGTTACTG	267.835	194.77	3.53052	4.28097	231.302	3.90575	0.0168859	depleted
NTC	NTC	ATAGATGTCTACGCGCCGTT	57.8007	83.3328	0	1.23942	70.5668	0.619709	0.00878188		KRAS CDE Neg	C2orf16	GCCTTAAGGATATGGACACG	113.562	234.595	0.706104	5.13717	174.078	2.92164	0.0167834	depleted
KRAS CDE Pos	ZIC1	TGACCACGTTAGGCGACGCG	13.9519	35.2851	0.430176	0	24.6185	0.215088	0.00873684		NTC	NTC	CCATCGGTTCGACTTACCGC	83.5644	0.622268	1.41221	0	42.0933	0.706104	0.0167747	depleted
KRAS CDE Neutral	SLC6A6	CATCCGCCTCTGCCAGACTG	240.504	240.239	1.7207	2.47884	240.371	2.09977	0.00873552		NTC	NTC	GAACCGGCGTGCGTTAGCGG	329.972	283.132	0	10.2743	306.552	5.13717	0.0167579	depleted
KRAS CDE Neg	DIRAS2	CCGCGAGGTGCAGAGCAGCG	35.2119	14.2642	0.430176	0	24.7381	0.215088	0.00869461		KRAS CDE Neg	TAF6	GAGATAAAGGTACTGAACCG	53.5669	194.148	0.706104	3.42478	123.857	2.06544	0.016676	depleted
KRAS CDE Neg	ITGAM	ATATGAGGATGTCATCCCTG	28.5682	42.7925	0	0.619709	35.6803	0.309855	0.00868418		KRAS CDE Pos	CCSER2	TAGCTTTCAAAATGACCCAA	139.274	202.237	1.41221	4.28097	170.756	2.84659	0.0166706	depleted
KRAS CDE Neutral	ISL2	TCCACGACCAGTTTATCCTG	127.56	164.413	1.29053	1.23942	145.987	1.26497	0.00866498		KRAS CDE Pos	MARVELD3	CCGGGGTCTCCCTTCCTCTG	10.7134	83.3839	0.706104	0.856194	47.0487	0.781149	0.016603	depleted
KRAS CDE Neutral	U2SURP	GTATGTTCCATCATAGAAGG	37.8694	33.7836	0	0.619709	35.8265	0.309855	0.00864875		KRAS CDE Pos	CRYAA	GCTGGACTCCGGCATCTCTG	32.1401	156.189	1.41221	1.71239	94.1647	1.5623	0.0165911	depleted
KRAS CDE Neg	LENG8	GCCACAGGGCGCACGGTGGA	207.95	134.384	1.7207	1.23942	171.167	1.48006	0.0086469		KRAS CDE Pos	PRSS16	CTAAGCGTGCGACAGCTCTG	190.698	222.772	0	6.84956	206.735	3.42478	0.016566	depleted
KRAS CDE Pos	HLA-DRB5	TGCAGACACAACTACGGGGT	26.575	45.7955	0	0.619709	36.1853	0.309855	0.008563		KRAS CDE Pos	EBF3	GCCGTAGGGAGAGTTAGCGG	27.8548	66.5827	0.706104	0.856194	47.2187	0.781149	0.0165432	depleted
KRAS CDE Neutral	PTGIS	ACGAGGATGAAGGAGAAGCA	204.628	135.134	0.430176	2.47884	169.881	1.45451	0.00856191		KRAS CDE Pos	NAGK	TCCTGTGCGTGGGCTCTGTG	167.129	144.366	0	5.13717	155.748	2.56858	0.016492	depleted
KRAS CDE Neutral	SDHD	GCAATGGTGCGATCTTGGCT	37.2051	13.5134	0.430176	0	25.3592	0.215088	0.00848163		KRAS CDE Neutral	TATDN1	CATTTCCTACCAAAAAGAAG	126.418	237.084	0	5.99336	181.751	2.99668	0.0164878	depleted
KRAS CDE Neutral	NAGPA	CCATTTGTGCAGCTGCTGAG	98.3276	171.921	0.430176	1.85913	135.124	1.14465	0.0084711		KRAS CDE Pos	ALPP	ACACCCTTAGGGAAGTCAGT	205.697	158.056	0	5.99336	181.877	2.99668	0.0164765	depleted
NTC	NTC	CTCGGCTTTACGATCGATCA	41.8557	9.00895	0.430176	0	25.4323	0.215088	0.00845726		KRAS CDE Neutral	RP1	TGCTTCCTGCTAGATTACCA	317.116	151.211	0	7.70575	234.164	3.85287	0.0164538	depleted
KRAS CDE Pos	CYP2D6	TGACCTGTTCTCTGCCGGGA	397.297	619.366	3.01123	5.57738	508.331	4.29431	0.00844785		KRAS CDE Neutral	RABL2A	GGCATGGGCCTTGTGGTAGT	25.7121	234.595	0	4.28097	130.154	2.14049	0.0164458	depleted
KRAS CDE Pos	EBF3	GGAATCTCCGCATATCTCGA	32.5544	18.7687	0.430176	0	25.6615	0.215088	0.00838172		KRAS CDE Neutral	MAFG	CCTGCGGGGCCTGTCCAAGG	0	42.9365	0.706104	0	21.4683	0.353052	0.0164453	depleted
KRAS CDE Pos	FN1	TCTGCCACTGTTCTCCTACG	43.1844	30.7806	0	0.619709	36.9825	0.309855	0.00837841		KRAS CDE Pos	TAS2R9	GTTCAGAGACCCCAGTACAG	98.5631	39.8252	1.41221	0.856194	69.1941	1.1342	0.0163916	depleted
KRAS CDE Pos	B3GAT1	CCCCGCAACTACAAGCTGCG	5.31501	46.5463	0.430176	0	25.9306	0.215088	0.00829474		KRAS CDE Pos	CDHR2	TGCGGTTGTTGGCTTCCGTC	231.409	281.888	0.706104	7.70575	256.648	4.20593	0.0163879	depleted
KRAS CDE Neg	RPAP1	CCAACATCACCACATCCCGA	339.496	251.5	3.01123	1.85913	295.498	2.43518	0.00824093		KRAS CDE Neg	GRB10	CTTGCTGTTTAATGATCCTG	115.705	286.243	1.41221	5.13717	200.974	3.27469	0.0162941	depleted
KRAS CDE Pos	ALDH1L2	GTATACCCCAGCCAGAAGAA	54.4788	96.0955	0	1.23942	75.2872	0.619709	0.00823127		KRAS CDE Pos	MARVELD3	TCGACCGCGGGACCGACCCG	47.1389	49.1592	0.706104	0.856194	48.149	0.781149	0.0162236	depleted
KRAS CDE Pos	HIST3H2A	GCGGGGCTGCAGTTCCCCGT	178.053	123.122	0	2.47884	150.588	1.23942	0.00823055		KRAS CDE Pos	CBWD1	CATCCTCACCATTGACAACG	914.923	1110.75	2.82442	29.9668	1012.84	16.3956	0.0161878	depleted
KRAS CDE Neutral	MTFR2	GCGCTCGTCACTCAAGCCAA	0	76.5761	0	0.619709	38.2881	0.309855	0.00809272		KRAS CDE Pos	EBF3	TCCTCCGCTAACTCTCCCTA	593.521	436.832	2.11831	14.5553	515.177	8.33681	0.0161824	depleted
KRAS CDE Neutral	EDN1	CTTAGGCGCTGAGCTCAGCG	67.7663	39.0388	0.860351	0	53.4026	0.430176	0.00805533		KRAS CDE Neg	CYP8B1	CATGGTCCCCTTGCACTGAA	319.259	264.464	0	9.41814	291.861	4.70907	0.0161346	depleted
KRAS CDE Pos	SIAE	GGACGGTCACTGAAAGCCTG	82.3826	48.0478	0.430176	0.619709	65.2152	0.524942	0.00804939		KRAS CDE Neg	PRH2	CAGCCAAGAAGACGTTCCCT	439.249	463.59	0	14.5553	451.419	7.27765	0.0161217	depleted
KRAS CDE Neg	HSP90B1	TATTCGTCAAACAGACCACG	91.0195	146.396	1.29053	0.619709	118.708	0.955118	0.00804598		NTC	NTC	CGTAACCGGAGATAATATTA	417.822	617.29	2.11831	14.5553	517.556	8.33681	0.016108	depleted
KRAS CDE Neg	EXOSC8	ACAGCAAAGGAAGTTGCAAC	77.0676	0	0	0.619709	38.5338	0.309855	0.00804111		KRAS CDE Neutral	ESF1	GAAAGGATAAACTGACCCCT	327.83	359.049	0.706104	10.2743	343.439	5.49022	0.015986	depleted
KRAS CDE Neutral	EDN1	ATTTATCAGCAGTTAGTGAG	211.936	175.675	0	3.09855	193.805	1.54927	0.00799397		KRAS CDE Neg	ZBTB3	CTGGGTACTACCCACCATCA	72.851	79.0281	0.706104	1.71239	75.9395	1.20925	0.0159238	depleted
KRAS CDE Pos	LEPROT	CGTGGCATTATCCTTCAGTG	59.1295	18.7687	0	0.619709	38.9491	0.309855	0.00795538		KRAS CDE Pos	CDK5R2	GCTGCCTTTCTTCTTCTTGG	494.958	556.93	2.11831	14.5553	525.944	8.33681	0.0158511	depleted
KRAS CDE Neutral	IKZF3	CAGTGCTCTGAAGAAATGTA	140.848	15.0149	0	1.23942	77.9313	0.619709	0.00795199		KRAS CDE Pos	ZNF408	GGGGAAGGCTCTTTAAAGCG	471.389	592.399	1.41221	15.4115	531.894	8.41185	0.0158149	depleted
KRAS CDE Neutral	ANP32A	AACTTGTCCTGGACAACAGT	41.1913	36.7866	0	0.619709	38.9889	0.309855	0.00794724		KRAS CDE Pos	OR52E8	CCAGTGGAACAACCATGTAC	449.962	482.88	3.53052	11.1305	466.421	7.33052	0.0157165	depleted
KRAS CDE Neutral	CSN3	CTATTTGGCACATAATACAT	148.82	85.5851	0	1.85913	117.203	0.929564	0.00793125		KRAS CDE Neg	ARHGEF11	CCCGGGTTATTTCAACAACG	233.552	75.9167	1.41221	3.42478	154.734	2.41849	0.01563	depleted
KRAS CDE Neutral	CSN3	CATGTGGCCTAACTACAGCT	88.362	44.294	0.430176	0.619709	66.328	0.524942	0.00791434		KRAS CDE Neg	PIEZO1	ATGAAGCGGGAGCTCTACAA	40.7109	14.3122	0	0.856194	27.5115	0.428097	0.0155607	depleted
KRAS CDE Pos	LRRN1	TTAGTAGGCCCAGCACCAAT	271.73	278.527	0	4.33796	275.128	2.16898	0.00788353		KRAS CDE Neutral	VPS26A	GTAAGGCTAGTTCTTTCACT	162.843	47.9147	0.706104	2.56858	105.379	1.63734	0.0155377	depleted
KRAS CDE Neutral	ST3GAL6	AGTAGTGCAAAGGACTCTTG	51.8213	27.0269	0	0.619709	39.4241	0.309855	0.00785952		KRAS CDE Neutral	LYZ	CGAGCTACAAACTACAATGC	47.1389	53.5151	0.706104	0.856194	50.327	0.781149	0.0155215	depleted
KRAS CDE Neutral	CXCR5	GAAGCCCTCGATCTTGTCAG	181.375	250.749	2.15088	1.23942	216.062	1.69515	0.00784566		KRAS CDE Neutral	C3orf38	AAAGTGCAGAAGAACTTCTG	10.7134	34.847	0.706104	0	22.7802	0.353052	0.0154982	depleted
KRAS CDE Neutral	LARP1B	AAACCAGCAATCAGGGAAAT	56.472	22.5224	0	0.619709	39.4972	0.309855	0.00784498		KRAS CDE Neutral	WFDC12	CAAGTGTGTGATTCCTGTGA	154.273	67.205	0	3.42478	110.739	1.71239	0.0154633	depleted
KRAS CDE Pos	FEM1B	ACAAAGCTCCTGCTGGACTG	222.566	251.5	0	3.71826	237.033	1.85913	0.00784333		KRAS CDE Neg	SLC10A5	AATTTATTTGACTTTCACAG	1626.29	991.273	16.2404	23.9734	1308.78	20.1069	0.0153631	depleted
NTC	NTC	TTGTCAACTTCGGCCAACGC	25.9107	53.303	0	0.619709	39.6068	0.309855	0.00782326		NTC	NTC	ACCCTAGCCTCATCGCGACC	657.802	418.164	2.82442	13.6991	537.983	8.26176	0.0153569	depleted
KRAS CDE Pos	NOG	CTGCCCACCTTCACGTAGCG	76.4032	57.8075	0.430176	0.619709	67.1053	0.524942	0.00782266		KRAS CDE Pos	TGOLN2	CGGTTCTGGAAATGGCAGCG	0	46.0478	0.706104	0	23.0239	0.353052	0.0153341	depleted
KRAS CDE Neutral	PFDN6	GATACAATAAGGTATCCAGA	110.286	189.939	1.7207	0.619709	150.113	1.17021	0.00779552		KRAS CDE Neutral	PTMS	CACCATGTCGGAGAAAAGCG	29.9975	16.179	0.706104	0	23.0882	0.353052	0.0152914	depleted
KRAS CDE Neutral	PARP8	CAACAACCAGACCATTCCTC	191.34	48.0478	0	1.85913	119.694	0.929564	0.00776617		KRAS CDE Pos	LBH	GATGAACACCCAGCCCATGG	227.124	228.372	3.53052	3.42478	227.748	3.47765	0.0152697	depleted
NTC	NTC	GGTCAAAGCGATGTTAGCCG	20.5957	59.309	0	0.619709	39.9523	0.309855	0.00775561		KRAS CDE Pos	SLC35D3	GGAGCAGATGACCAGCAGCG	25.7121	20.5349	0.706104	0	23.1235	0.353052	0.0152681	depleted
KRAS CDE Pos	SLC26A9	ATCGTGGGAGAAATCCAACG	125.567	169.669	0.430176	1.85913	147.618	1.14465	0.00775415		KRAS CDE Neutral	CABLES2	GCGCAGTCTGAGGATGGCCG	10.7134	45.4256	0	0.856194	28.0695	0.428097	0.0152513	depleted
KRAS CDE Neutral	SMOX	GGACTGTGAGCTGATCCCGG	28.5682	27.0269	0.430176	0	27.7975	0.215088	0.00773766		KRAS CDE Neutral	PCDH18	AATTCTTGCCCAGTACATCG	68.5656	204.104	0.706104	3.42478	136.335	2.06544	0.0151498	depleted
KRAS CDE Neutral	SLC6A12	AGACCACTTCAAACAATGAC	242.497	541.288	1.7207	4.33796	391.893	3.02933	0.00773001		KRAS CDE Neg	RTN4RL1	GTGCTACCCGGCGCCCATGA	167.129	59.1155	0	3.42478	113.122	1.71239	0.0151375	depleted
KRAS CDE Neg	CDC40	TGAACCCGAACCATAGGAAG	68.4307	92.3418	0	1.23942	80.3863	0.619709	0.00770914		KRAS CDE Neg	MGAT2	GTGAGTCCAGCAGCAGTCTG	456.39	116.986	3.53052	5.13717	286.688	4.33384	0.0151169	depleted
KRAS CDE Neg	CCR2	ACTACACAAGGACTCCTCGA	96.9989	120.119	0.430176	1.23942	108.559	0.834797	0.00768979		KRAS CDE Neutral	C3orf38	TTACTAGTGACAGCAAACGA	47.1389	0	0.706104	0	23.5694	0.353052	0.0149792	depleted
KRAS CDE Pos	C6orf223	AGGCCCACTCCGTTGCTGAA	121.581	39.7896	0	1.23942	80.6852	0.619709	0.00768058		KRAS CDE Neutral	VGLL2	GGGGGACATCAGCTCCGTGG	47.1389	0	0.706104	0	23.5694	0.353052	0.0149792	depleted
KRAS CDE Pos	CCDC7	ATTTGCCGATTTGTTACTGG	348.133	447.445	3.01123	3.09855	397.789	3.05489	0.00767967		KRAS CDE Neutral	AK1C1	GGATCTCTGTGCCACATGGG	70.7083	23.6462	1.41221	0	47.1773	0.706104	0.014967	depleted
NTC	NTC	CCGTATACGTATCTATGCCG	83.7114	53.303	0.430176	0.619709	68.5072	0.524942	0.00766259		KRAS CDE Neg	DNAJC22	ACAGAGGCAGAGCCCCAGAG	42.8535	4.35588	0.706104	0	23.6047	0.353052	0.0149568	depleted
NTC	NTC	TCTAGGATACTCTTAACGGG	65.1088	96.8463	0	1.23942	80.9776	0.619709	0.00765285		KRAS CDE Pos	CCDC3	ATAGGAGTAGTCCTGGACCA	349.256	660.227	5.64883	9.41814	504.741	7.53349	0.0149254	depleted
KRAS CDE Neutral	PCDHA6	ACTGGGTGCAGGCCAAGTGG	67.102	70.5701	0.430176	0.619709	68.8361	0.524942	0.00762598		KRAS CDE Neg	NUDT4	TCACTGAAATATTAGAAGAT	278.548	296.2	0	8.56194	287.374	4.28097	0.0148969	depleted
KRAS CDE Neutral	CORT	CACCGCTGCCCTGCCCCTGG	112.28	113.363	1.7207	0	112.821	0.860351	0.0076258		KRAS CDE Pos	CCDC7	TGAAGAATCGCCTTAAACAG	160.701	317.979	2.82442	4.28097	239.34	3.55269	0.0148437	depleted
KRAS CDE Neutral	CA8	TGGGGAAGAGAAAACCAGCG	23.9175	57.8075	0	0.619709	40.8625	0.309855	0.00758286		KRAS CDE Neg	IGSF10	TCTGCTTTCATCTCTCCCCA	499.244	973.228	6.35494	15.4115	736.236	10.8832	0.0147822	depleted
KRAS CDE Neutral	UBTD2	CTGGCACAAGCAATCATTGA	156.128	89.3388	0	1.85913	122.734	0.929564	0.00757384		KRAS CDE Neg	PRH2	GTTTCAACTCACACAGATGG	57.8523	47.9147	0.706104	0.856194	52.8835	0.781149	0.0147711	depleted
KRAS CDE Pos	ZIC1	GCTGGCTTCGGCCGGCCAGA	145.498	156.906	0.430176	1.85913	151.202	1.14465	0.00757034		KRAS CDE Neg	RNF103	ATTGTGATGTGGTTGGCTGG	233.552	172.368	0	5.99336	202.96	2.99668	0.0147649	depleted
KRAS CDE Neutral	CORT	CCCCTGGAGGGTGGCCCCAC	33.8832	48.0478	0	0.619709	40.9655	0.309855	0.0075638		KRAS CDE Neutral	CLEC3A	CAGGGCTTGAATTTCCTTCA	188.556	197.259	1.41221	4.28097	192.907	2.84659	0.0147563	depleted
KRAS CDE Neg	CDV3	TTACCAATTACTGGAGCAGG	403.276	310.058	0.430176	4.95767	356.667	2.69392	0.00755305		KRAS CDE Neg	AMFR	CAACATTCTTGGCATTACGC	2.14268	56.0041	0	0.856194	29.0734	0.428097	0.0147247	depleted
KRAS CDE Pos	MARCH5	AAGATGATAGAACAGCTGAA	89.6907	49.5493	0.430176	0.619709	69.62	0.524942	0.00754011		KRAS CDE Neutral	SOS2	TCTGAAGAAGCAGATACTGG	72.851	188.547	2.11831	1.71239	130.699	1.91535	0.0146547	depleted
KRAS CDE Neutral	AFP	GCAGCCCAAAGAAGAATTGT	11.2944	45.7955	0.430176	0	28.545	0.215088	0.00753505		KRAS CDE Pos	PPTC7	ACGTCTTTCGATGTCCAGCT	743.509	766.634	0.706104	21.4049	755.072	11.0555	0.0146416	depleted
KRAS CDE Neg	RIN2	TATAAGGCAGAGCTGACGCA	171.409	271.77	0.860351	2.47884	221.59	1.66959	0.00753462		KRAS CDE Neutral	ZNF133	ACCAGAACTCATCACCCAGC	265.692	454.878	2.82442	7.70575	360.285	5.26508	0.0146137	depleted
KRAS CDE Neutral	ESF1	GAAAGGATAAACTGACCCCT	180.71	207.957	0.430176	2.47884	194.333	1.45451	0.00748459		KRAS CDE Neutral	RABL2A	TGATGCAGGCATGGGCCTTG	2.14268	56.6264	0	0.856194	29.3845	0.428097	0.0145688	depleted
KRAS CDE Pos	MRVI1	AGAACTTCAAGACCTGAAGG	152.142	161.41	1.7207	0.619709	156.776	1.17021	0.00746418		KRAS CDE Pos	ETF1	TGGCTCCCAGGACTGAAAGG	2.14268	57.2487	0	0.856194	29.6957	0.428097	0.0144161	depleted
KRAS CDE Pos	TNFSF9	GCGAAAGCTCGGGACCCTCG	98.3276	157.657	1.29053	0.619709	127.992	0.955118	0.00746232		KRAS CDE Pos	LEPROT	CCCCAGTTCGGGAGACATGG	629.947	238.951	5.64883	6.84956	434.449	6.24919	0.0143842	depleted
KRAS CDE Neutral	TSPAN31	TGCGCTTTGCGCTCTCAACG	1.99313	81.0806	0	0.619709	41.5369	0.309855	0.00745975		KRAS CDE Neg	USF2	CATCAGTCACCTGGACTACG	389.967	563.153	0	13.6991	476.56	6.84956	0.0143729	depleted
KRAS CDE Neutral	SLC35G3	CTTTCTCGTATGGCTTACCA	215.922	231.981	0.860351	2.47884	223.951	1.66959	0.00745516		KRAS CDE Neutral	PRDM11	GGTGTGTCAGACACAAACAC	42.8535	16.8012	0	0.856194	29.8274	0.428097	0.0143525	depleted
KRAS CDE Neg	LENG8	GTAGGAGTCGTCATACATGG	462.406	583.33	3.4414	4.33796	522.868	3.88968	0.00743914		KRAS CDE Pos	SNRPF	AAGTGGGGAATGGAGTACAA	14.9987	34.2248	0.706104	0	24.6117	0.353052	0.0143449	depleted
KRAS CDE Neutral	POLR1D	AATAGAAGAACTGCTTAAGG	99.6564	67.5672	0	1.23942	83.6118	0.619709	0.00741175		KRAS CDE Neg	CCR2	CCACTCCAAAAACCAGTGTG	113.562	143.122	2.82442	0.856194	128.342	1.84031	0.0143391	depleted
KRAS CDE Neutral	LEO1	GAGAGAAACAGCACCAGCGG	47.1707	36.7866	0	0.619709	41.9786	0.309855	0.00738125		KRAS CDE Neutral	C14orf159	TAATCGTTGACCAGAGAGCC	327.83	109.519	2.82442	3.42478	218.674	3.1246	0.0142888	depleted
KRAS CDE Neutral	EFTUD2	ATGAGGTGGTCCAGATTACG	52.4857	31.5313	0	0.619709	42.0085	0.309855	0.00737599		KRAS CDE Neg	BCAR1	CAAAGCGCTCTATGACAATG	205.697	204.726	0.706104	5.13717	205.212	2.92164	0.0142372	depleted
KRAS CDE Neg	RAF1	GCATCAATGGAGCACATACA	20.5957	97.597	0.860351	0	59.0963	0.430176	0.00727923		KRAS CDE Pos	ASB18	ATAGTCGAGCGCGCCCGCGT	192.841	228.372	0	5.99336	210.607	2.99668	0.0142288	depleted
KRAS CDE Neutral	RAD18	GGAATGTTAACCCCGCAAAC	59.1295	87.0866	0.430176	0.619709	73.108	0.524942	0.00718037		KRAS CDE Neutral	COMMD7	TATGGCCCATCGAGCAAGGG	4.28535	45.4256	0.706104	0	24.8555	0.353052	0.0142042	depleted
KRAS CDE Neg	WDR46	ACCTGCAGAGCTTATTTGTC	229.874	289.788	0	3.71826	259.831	1.85913	0.00715514		NTC	NTC	TTACTGATCAGTCGGACGCA	0	60.36	0	0.856194	30.18	0.428097	0.0141848	depleted
KRAS CDE Pos	YIPF5	AGGTGTTTCATTTGGTTGTG	97.6633	162.912	0	1.85913	130.288	0.929564	0.00713471		KRAS CDE Neutral	UBTD2	CAGAGTGCTACGATGAACTG	407.109	501.548	0	12.8429	454.328	6.42146	0.014134	depleted
KRAS CDE Pos	CDKN1C	GCTTGGAGAGGGACACGGCG	128.889	45.7955	0	1.23942	87.3422	0.619709	0.00709519		KRAS CDE Neutral	TSPAN31	TCCAGCATCCACATCATCGG	344.971	371.494	0.706104	9.41814	358.233	5.06212	0.0141308	depleted
KRAS CDE Neg	GLMN	ACTGGATTATGGACAGAACT	60.4582	60.8104	0.860351	0	60.6343	0.430176	0.00709459		KRAS CDE Neutral	KCNAB3	GCTCTTGAGGATGTTCCCTA	237.837	265.086	2.82442	4.28097	251.462	3.55269	0.0141282	depleted
KRAS CDE Neg	SPG21	AGAGCTCATCTGAAAACAGG	65.1088	109.609	0	1.23942	87.3589	0.619709	0.00709383		KRAS CDE Neg	RPAP1	CCAACATCACCACATCCCGA	261.407	225.261	4.23662	2.56858	243.334	3.4026	0.0139833	depleted
KRAS CDE Pos	LOR	TCTGGCTGCGGCTACTCCGG	719.519	723.719	0.860351	9.29564	721.619	5.07799	0.00703694		KRAS CDE Neutral	ANGL5	TGAATTATGTATAAACCACT	152.13	215.305	0	5.13717	183.717	2.56858	0.0139812	depleted
KRAS CDE Pos	SLC30A10	GCGCGCCCACCACCTCGGCG	88.362	87.8373	0	1.23942	88.0997	0.619709	0.00703418		KRAS CDE Pos	SPEN	CCCCACTAAGGATCGCCCAG	66.423	95.8293	1.41221	0.856194	81.1261	1.1342	0.0139807	depleted
KRAS CDE Pos	IL36RN	GGCTTCCACCCTGGACACCC	151.478	86.3358	0.430176	1.23942	118.907	0.834797	0.0070206		KRAS CDE Neg	ZFP3	GATGGTGGCCATTCTCCAGG	402.823	239.573	2.11831	6.84956	321.198	4.48393	0.01396	depleted
KRAS CDE Neg	EXOC3	AGTATCGCAGGAGAGAAGCG	93.677	91.591	1.29053	0	92.634	0.645263	0.00696573		KRAS CDE Neutral	PTP4A2	GAACTTGTTGAGAGTAGCAT	102.848	171.746	2.11831	1.71239	137.297	1.91535	0.0139504	depleted
KRAS CDE Pos	SPEN	GGTACACAGGGATATCTACA	90.3551	149.399	0.430176	1.23942	119.877	0.834797	0.00696379		KRAS CDE Neg	OR5T2	AATTTCCCATGAGAGTGAAG	244.265	369.627	0	8.56194	306.946	4.28097	0.013947	depleted
KRAS CDE Neutral	TRPV1	TGGAAGCCACATACTCCTTG	67.102	84.0836	0.430176	0.619709	75.5928	0.524942	0.00694435		KRAS CDE Pos	CCNG2	TTTCTGCCAACTTACCTCCG	87.8497	125.698	2.11831	0.856194	106.774	1.48725	0.013929	depleted
KRAS CDE Pos	MAP2K2	CCTCGTTCACAATATAGTCC	128.889	57.8075	1.29053	0	93.3482	0.645263	0.00691244		KRAS CDE Pos	PPTC7	TTCGTACCTAGTAATCCCAT	702.798	733.654	2.82442	17.1239	718.226	9.97415	0.0138872	depleted
KRAS CDE Pos	DDX60	TCACAGAAATTTGATAACCG	162.108	205.704	1.29053	1.23942	183.906	1.26497	0.00687836		KRAS CDE Neutral	NFKBIB	GTGACGTAGCCGAAGACGAG	59.9949	63.4714	0	1.71239	61.7332	0.856194	0.0138693	depleted
KRAS CDE Pos	ASB18	GCGCGCCTCCTACTGCGGCA	13.2875	111.861	0.860351	0	62.5744	0.430176	0.00687463		KRAS CDE Pos	LBH	CCGTCTGCCCTCCATAGTGG	302.117	253.885	0	7.70575	278.001	3.85287	0.0138592	depleted
KRAS CDE Neg	EXOC5	CCTTGGAGACCAGTTAGAGG	23.9175	129.128	0.430176	0.619709	76.5229	0.524942	0.00685994		KRAS CDE Pos	KIF17	GCTACAGGCTCATGCTCAGT	109.277	65.3382	0.706104	1.71239	87.3073	1.20925	0.0138505	depleted
KRAS CDE Neg	USF2	GAGAGTAAGGGTGTGTCCGG	23.9175	66.8164	0	0.619709	45.367	0.309855	0.00682996		KRAS CDE Neg	RAP1B	GTCAAAATCTAGCAAGACAA	70.7083	289.977	0.706104	4.28097	180.343	2.49354	0.0138267	depleted
KRAS CDE Neutral	SH3BP5L	GGATCCTACAGGAGTCGGCG	46.5063	16.5164	0.430176	0	31.5114	0.215088	0.00682572		KRAS CDE Neg	ZBTB3	GCAGTCACAAAGGAAACCCT	81.4217	82.7617	1.41221	0.856194	82.0917	1.1342	0.0138163	depleted
KRAS CDE Neutral	NUDT5	GAAGAAGAAACTGGCTACAA	91.0195	90.8403	0	1.23942	90.9299	0.619709	0.00681524		KRAS CDE Neutral	INHBB	CCAGGAAGTCGCCGTCCACT	317.116	387.673	2.82442	6.84956	352.395	4.83699	0.013726	depleted
KRAS CDE Neutral	RP1L1	CCCTCTGTGCTGGTGTGTGC	51.1569	39.7896	0	0.619709	45.4732	0.309855	0.006814		KRAS CDE Pos	SCUBE2	CGAACTTCCTGCTTCCCCTG	160.701	141.255	0.706104	3.42478	150.978	2.06544	0.0136804	depleted
KRAS CDE Pos	TGOLN2	AAAGATCTAAAGTCACCCGG	49.8282	315.313	0	2.47884	182.571	1.23942	0.0067887		KRAS CDE Neg	CYP8B1	GGATGGAGCCAAAGGAGAGG	252.836	437.455	0	9.41814	345.145	4.70907	0.0136437	depleted
KRAS CDE Pos	DBNDD2	GGCTACTGGTACTTCCAAGG	75.0745	51.8015	0.860351	0	63.438	0.430176	0.00678104		KRAS CDE Pos	ALOX5AP	CATCGTCACCCTCATCAGCG	0	62.8491	0	0.856194	31.4245	0.428097	0.013623	depleted
KRAS CDE Neg	CDC40	AAATTGTGCAGGAATATGAT	63.7801	155.404	0.860351	0.619709	109.592	0.74003	0.00675258		KRAS CDE Neutral	GNPNAT1	TCTAGGACAGATTGTTGCTA	122.133	172.368	1.41221	2.56858	147.25	1.9904	0.0135171	depleted
NTC	NTC	AGAAAGGCACGTGCGACGTC	53.8144	102.101	0.430176	0.619709	77.958	0.524942	0.00673366		KRAS CDE Neg	IL11RA	GCTACACACGCAGCCAGAGG	107.134	19.9126	0	1.71239	63.5232	0.856194	0.0134785	depleted
KRAS CDE Neutral	NEK2	TGTAATTACAAAGGGAACCA	126.896	93.0925	0.860351	0.619709	109.994	0.74003	0.0067279		KRAS CDE Neg	ABCD4	GCTCATTGTTCTGAACTCCA	145.702	64.0936	2.82442	0	104.898	1.41221	0.0134627	depleted
KRAS CDE Neutral	RAD18	AGAAAAGTGGTTTGTTACTG	190.012	258.257	3.01123	0	224.134	1.50561	0.00671747		KRAS CDE Neutral	C1orf87	ATGGCACTAAGGACAACCAA	17.1414	98.9407	0.706104	0.856194	58.041	0.781149	0.0134586	depleted
KRAS CDE Neg	NDRG4	ATCCCCAACCACCAGCATCA	387.331	166.666	0	3.71826	276.998	1.85913	0.00671169		KRAS CDE Neutral	C1orf87	GATAAGGACTGGTCTCCGGT	25.7121	37.9584	0	0.856194	31.8352	0.428097	0.0134473	depleted
KRAS CDE Neutral	U2SURP	GAGATTCTCCAACTAAATGG	146.827	105.855	0.430176	1.23942	126.341	0.834797	0.00660748		KRAS CDE Pos	YIPF5	TGGGCAGAAGACAATATCCA	233.552	149.344	0	5.13717	191.448	2.56858	0.0134166	depleted
KRAS CDE Neg	WDR46	GCCGGTGAGCCCAACTTCGA	81.0539	171.921	0.430176	1.23942	126.487	0.834797	0.00659984		KRAS CDE Neutral	SENP8	GTAGACCAATAAACTCCAGT	497.101	386.429	0.706104	11.1305	441.765	5.91832	0.013397	depleted
KRAS CDE Neg	SLC1A3	AGTCCCATCCATGTTAATGG	738.786	476.724	4.30176	3.71826	607.755	4.01001	0.00659806		KRAS CDE Neg	NDRG4	TGGGGATAATGCACCCGCTG	19.2841	98.3184	0.706104	0.856194	58.8012	0.781149	0.0132846	depleted
KRAS CDE Pos	ATF6	GCAGGTTGTAAACTGATAAT	130.882	57.0567	0	1.23942	93.9694	0.619709	0.0065948		KRAS CDE Neutral	RAB3IL1	GGAACACCAAACCTACCATG	29.9975	87.7398	0.706104	0.856194	58.8686	0.781149	0.0132694	depleted
NTC	NTC	TACTTAGGTCCGCGTAAAGC	136.197	147.146	0	1.85913	141.672	0.929564	0.0065614		KRAS CDE Neg	SPACA7	ACAGCAGGAGGACAAAGCAG	32.1401	21.1571	0.706104	0	26.6486	0.353052	0.0132484	depleted
KRAS CDE Neg	SLC10A5	ATATTTCTATCAATATGCAT	206.621	360.358	0	3.71826	283.49	1.85913	0.00655801		KRAS CDE Pos	ASB4	GATCTTAACACAATCCACAT	44.9962	191.036	1.41221	1.71239	118.016	1.5623	0.013238	depleted
KRAS CDE Neg	RDM1	GAGCCCAAAAGGCATGCGAC	62.4513	69.8194	0.860351	0	66.1354	0.430176	0.00650447		KRAS CDE Pos	HLA-DRB5	TTGCCATGTAGGAACCTCCA	94.2778	142.499	1.41221	1.71239	118.389	1.5623	0.0131964	depleted
KRAS CDE Neutral	CCDC58	TCACAGTTCACACCGCCACT	346.14	130.63	0	3.09855	238.385	1.54927	0.00649904		KRAS CDE Neg	CDC40	GCTATGTACTTGAAATCCAC	173.557	151.211	0	4.28097	162.384	2.14049	0.0131816	depleted
KRAS CDE Neg	OR2T5	ACTGATGAAAAAGTACATGG	258.442	168.167	2.15088	0.619709	213.305	1.38529	0.00649444		KRAS CDE Neg	PTH	GATGATACCTGCAAAAGACA	2.14268	51.6483	0.706104	0	26.8955	0.353052	0.0131268	depleted
KRAS CDE Neg	RDM1	ACTGAAACTGAAGTACTTCA	21.9244	73.5731	0	0.619709	47.7488	0.309855	0.00648927		KRAS CDE Pos	PRMT8	TAAAATAGGTGACCAGGGCG	38.5682	92.0957	0	1.71239	65.3319	0.856194	0.0131053	depleted
KRAS CDE Pos	NR1H3	GCATCCTCAGAGAGGAAGCC	95.6701	0	0	0.619709	47.8351	0.309855	0.00647756		KRAS CDE Neutral	WFDC9	TCTGGAACAAAGATCCCTGT	137.131	166.768	1.41221	2.56858	151.95	1.9904	0.0130991	depleted
KRAS CDE Pos	TWIST1	CGTCCCCCGCGCTTGCCGCT	104.307	57.8075	0.430176	0.619709	81.0572	0.524942	0.00647619		KRAS CDE Neutral	ODF2L	CAGAGAAAGAAGATTTACCA	32.1401	21.7794	0.706104	0	26.9598	0.353052	0.0130955	depleted
KRAS CDE Neg	KRTAP4-2	TGCCGCCCAACCTGCTCTAG	206.621	126.876	2.15088	0	166.749	1.07544	0.00644947		KRAS CDE Neg	PIEZO1	GTACTGGCTGATGAACTGCA	261.407	293.088	2.11831	5.13717	277.247	3.62774	0.0130848	depleted
KRAS CDE Neg	PRH2	TGGTTCCCATCACCAGCAGA	74.4101	21.7716	0	0.619709	48.0909	0.309855	0.00644311		KRAS CDE Neutral	AARD	GCATTTCCAAAACCACCAGC	51.4242	79.6503	0	1.71239	65.5373	0.856194	0.0130642	depleted
KRAS CDE Neutral	PPP3CA	CCTGAGCACTGAGAACACTC	124.238	165.164	0	1.85913	144.701	0.929564	0.00642402		KRAS CDE Neg	TESK1	TGAAGCCTCGATCTTCCCGT	17.1414	48.5369	0	0.856194	32.8392	0.428097	0.0130362	depleted
KRAS CDE Neutral	HAL	GACCTGCTATTTCTGATGGG	183.368	114.113	1.29053	0.619709	148.741	0.955118	0.00642137		KRAS CDE Pos	GMPPA	TCAAGGCTTCAGGAGAAAAG	0	65.9604	0	0.856194	32.9802	0.428097	0.0129804	depleted
KRAS CDE Neutral	SENP8	GGTAGACCAATAAACTCCAG	53.1501	110.36	0.430176	0.619709	81.7549	0.524942	0.00642093		KRAS CDE Neutral	PCDH18	ATAGATAGGCTGTTGGGTGA	212.125	137.521	2.82442	1.71239	174.823	2.2684	0.0129754	depleted
KRAS CDE Pos	ALDH8A1	GCCAAATAGTGGAAAAGACG	203.299	249.998	0.430176	2.47884	226.649	1.45451	0.00641745		KRAS CDE Neutral	IPO8	ATTCAACTATCTCAACCAAG	34.2828	31.7357	0	0.856194	33.0093	0.428097	0.012969	depleted
KRAS CDE Pos	GPN3	ATGACCAGCTGCGCATACCG	70.4238	26.2761	0	0.619709	48.35	0.309855	0.00640858		KRAS CDE Neutral	EMILIN3	ATTTGGGTCTGAGTACTGTG	329.972	583.065	0.706104	11.1305	456.519	5.91832	0.012964	depleted
KRAS CDE Pos	GIPC1	CCACATCCACCTCATCAGCG	63.7801	70.5701	0.860351	0	67.1751	0.430176	0.00640379		KRAS CDE Pos	LMO4	TAATGTAGTCATTTCTGCAA	107.134	79.6503	0.706104	1.71239	93.3921	1.20925	0.0129481	depleted
KRAS CDE Pos	CLDN23	ATGCCCAGCGTCATCACCAC	142.176	148.648	0	1.85913	145.412	0.929564	0.00639262		KRAS CDE Neutral	EDN1	TTTATCCATCAGGGACGAGC	51.4242	112.631	2.11831	0	82.0274	1.05916	0.0129122	depleted
KRAS CDE Neg	FAM162A	TGAAGCGACCTGACCATATG	0	67.5672	0.430176	0	33.7836	0.215088	0.00636664		KRAS CDE Neg	NACC1	GTACTGTGACGTGTCAGTGG	160.701	136.899	2.11831	1.71239	148.8	1.91535	0.012872	depleted
KRAS CDE Pos	SCUBE2	GCACACCTGCATTCACCGCT	69.7595	95.3448	0.430176	0.619709	82.5521	0.524942	0.00635892		KRAS CDE Pos	CDKN1C	GCTGGAAGTCGTAATCCCAG	62.1376	126.943	0.706104	1.71239	94.5402	1.20925	0.0127908	depleted
KRAS CDE Neutral	PTMS	GCAGGACCTGAAGGAGAAGA	136.197	164.413	1.29053	0.619709	150.305	0.955118	0.00635452		KRAS CDE Neutral	RPSA	TCAGTAACCACAAGAAGCCG	0	55.3819	0.706104	0	27.6909	0.353052	0.0127497	depleted
KRAS CDE Pos	TRIM24	ACAAGAAAGATGGAATACTT	95.6701	39.7896	0.860351	0	67.7298	0.430176	0.00635135		KRAS CDE Pos	TWIST1	CGTCCCCCGCGCTTGCCGCT	0	55.3819	0.706104	0	27.6909	0.353052	0.0127497	depleted
KRAS CDE Pos	TCF12	CCAGAGAACGCTTACGCGTG	72.417	63.8134	0.860351	0	68.1152	0.430176	0.00631541		KRAS CDE Pos	SCRG1	GGAATCACGAAAGAGATCTT	220.696	215.927	2.11831	3.42478	218.311	2.77154	0.0126954	depleted
KRAS CDE Neg	ITGAM	AGAACACCAGGCTGATGGGG	91.6839	105.104	0	1.23942	98.3942	0.619709	0.00629823		KRAS CDE Neg	CPAMD8	TGTAGGGTACTACAGCCACG	147.845	86.4953	2.11831	0.856194	117.17	1.48725	0.0126931	depleted
KRAS CDE Neutral	FAM105A	TGGAAAACTACGGAAATATG	392.646	238.737	0.860351	3.09855	315.692	1.97945	0.00627019		KRAS CDE Neutral	SOHLH2	CCGAGATCTGGCAGTGCTCC	83.5644	118.853	0	2.56858	101.209	1.28429	0.0126895	depleted
KRAS CDE Pos	TWIST1	GATCATCCCCACGCTGCCCT	75.7389	23.2731	0	0.619709	49.506	0.309855	0.00625893		KRAS CDE Pos	ATXN7L2	GTGTAACCACTGCAGCCAAG	40.7109	150.589	0.706104	1.71239	95.6499	1.20925	0.0126424	depleted
KRAS CDE Neg	CCR2	ATGAACACCAGCGAGTAGAG	50.4926	48.7985	0	0.619709	49.6455	0.309855	0.00624134		KRAS CDE Neg	SEMA5B	TCTGCAGTCCTAGCTCCGGG	557.096	448.033	0.706104	11.9867	502.565	6.34641	0.0126281	depleted
KRAS CDE Neg	EIF4B	AGCAGCTCGAGTGGACTGGG	83.047	16.5164	0	0.619709	49.7817	0.309855	0.00622427		KRAS CDE Neg	KAT8	ACACGGAGATGTTGCTCTTG	374.968	223.394	0.706104	6.84956	299.181	3.77783	0.0126272	depleted
NTC	NTC	GTTGCGTCCATTCCGTCGCC	64.4445	104.354	0.430176	0.619709	84.3991	0.524942	0.00621976		KRAS CDE Pos	CDKN1C	GCTTGGAGAGGGACACGGCG	0	56.0041	0.706104	0	28.0021	0.353052	0.0126081	depleted
KRAS CDE Neg	CSGALNACT2	TTGAATGAAGAATTTAATCG	68.4307	100.6	0.430176	0.619709	84.5154	0.524942	0.00621121		KRAS CDE Neg	NANOG	ATTGAGTACACACAGCTGGG	119.99	219.661	0	4.28097	169.825	2.14049	0.012604	depleted
KRAS CDE Neutral	ISL2	CCTCCTGCTCGAGCGCGCCG	63.7801	36.0358	0	0.619709	49.908	0.309855	0.00620852		KRAS CDE Pos	B3GAT1	CAGGTGCGTGTAGTTGAGGC	89.9924	34.2248	0.706104	0.856194	62.1086	0.781149	0.0125772	depleted
NTC	NTC	ACCAGGACTGCCGCGTGAGG	143.505	233.482	1.7207	0.619709	188.494	1.17021	0.0062082		KRAS CDE Neg	RPAP1	GGAACGAGATACAAGTTCAG	68.5656	112.008	1.41221	0.856194	90.287	1.1342	0.0125622	depleted
KRAS CDE Neg	DDX23	CTCCACCGCTGGGGGCATGG	304.284	143.393	2.15088	0.619709	223.838	1.38529	0.00618881		KRAS CDE Pos	ITGB4	GAACGTGCCCTACAAGTTCA	117.847	62.8491	1.41221	0.856194	90.3482	1.1342	0.0125537	depleted
KRAS CDE Neutral	XCL2	AATACAGCTGTGACCCTGAC	199.313	272.521	0.430176	2.47884	235.917	1.45451	0.00616533		KRAS CDE Neg	DDX5	TGACTACCCTAACTCCTCAG	428.535	458.612	0	11.1305	443.574	5.56526	0.0125464	depleted
KRAS CDE Neg	ASPSCR1	AATGGCTGAGAAGCTCCCAG	115.601	85.5851	0	1.23942	100.593	0.619709	0.00616055		KRAS CDE Neutral	KCTD1	TGTTGTTGGAGATGGAAAGA	0	112.631	1.41221	0	56.3153	0.706104	0.0125384	depleted
KRAS CDE Pos	PLXNB2	CAAGTACACTCTCAACGACA	87.6976	52.5522	0.860351	0	70.1249	0.430176	0.00613442		KRAS CDE Neutral	RP1	ATTTCTACAGCACCTGACAG	269.977	342.87	4.23662	3.42478	306.424	3.8307	0.0125013	depleted
KRAS CDE Neg	TLN2	AAGCTGCCTTCTGGGCTGCA	53.8144	47.297	0	0.619709	50.5557	0.309855	0.00612897		KRAS CDE Pos	CNRIP1	CTTCACCTCAACCTTGTAGG	64.2803	129.432	0.706104	1.71239	96.856	1.20925	0.012485	depleted
KRAS CDE Neutral	BCAP29	TAAAAAACTAGTAGAAGACC	75.0745	26.2761	0	0.619709	50.6753	0.309855	0.00611451		KRAS CDE Neutral	NOSTRIN	ATTCAACTCATCATCTTGCC	409.251	459.856	1.41221	9.41814	434.554	5.41517	0.0124615	depleted
KRAS CDE Neg	TLN2	AGTGAAAACCAAGTTTGTGG	144.834	27.0269	0.430176	0.619709	85.9304	0.524942	0.00610893		KRAS CDE Neg	OR2T5	AAAGTTGGATTTCATCCTCA	81.4217	56.0041	0	1.71239	68.7129	0.856194	0.0124605	depleted
KRAS CDE Pos	TCF12	TCAAATCCATCAACACCAGT	44.5132	57.0567	0	0.619709	50.7849	0.309855	0.00610131		KRAS CDE Neutral	IQSEC3	ATCCAGTTCCTGATCTCACG	171.414	298.066	0.706104	5.13717	234.74	2.92164	0.0124462	depleted
KRAS CDE Pos	RBP1	GCTACAATGGATCCTCCCGC	90.3551	183.933	0.430176	1.23942	137.144	0.834797	0.00608701		KRAS CDE Pos	EZH2	CATCTGACGTGGCAGGCTGG	321.401	148.1	0.706104	5.13717	234.751	2.92164	0.0124457	depleted
KRAS CDE Pos	ALOX5AP	ATCAGTCCAGCAAACGCAGC	177.388	199.699	0.430176	1.85913	188.543	1.14465	0.00607102		KRAS CDE Neutral	DHX57	CTTCTCGTGGTACAACAGGT	154.273	121.342	0	3.42478	137.808	1.71239	0.0124259	depleted
KRAS CDE Pos	MAP2K2	GATGGATAGCCGGCCTGCCA	57.8007	44.294	0	0.619709	51.0474	0.309855	0.00606994		KRAS CDE Neutral	OR7D2	GCCAGGTGACAAAAACCAGG	4.28535	180.458	1.41221	0.856194	92.3716	1.1342	0.0122787	depleted
NTC	NTC	GTCAAGCCGAACGCTGCCGG	80.3895	21.7716	0	0.619709	51.0806	0.309855	0.006066		KRAS CDE Neg	ARNTL2	TTCTGAAATGGGGGAGCTAG	205.697	260.108	1.41221	4.28097	232.903	2.84659	0.0122222	depleted
KRAS CDE Neg	SLC5A8	CTTTGTGGTGGTCATCAGCG	85.7045	158.407	0.860351	0.619709	122.056	0.74003	0.00606304		KRAS CDE Neg	TTBK1	GTTCTTGTGGGCATTGACTG	169.271	41.0697	0	2.56858	105.171	1.28429	0.0122115	depleted
KRAS CDE Neutral	AKAP13	TTCTGAAGAATGCAGCAGGA	35.8763	137.387	0.430176	0.619709	86.6314	0.524942	0.00605949		KRAS CDE Pos	RBP1	GCTGGAGACTGCCGGGACAG	81.4217	104.541	1.41221	0.856194	92.9814	1.1342	0.0121982	depleted
KRAS CDE Neutral	TMOD3	AAGCATTGGAGCATAAAGAC	89.0264	13.5134	0	0.619709	51.2699	0.309855	0.0060436		KRAS CDE Neg	PAX1	GTACTTGTCACAGACGCCGT	19.2841	51.026	0	0.856194	35.155	0.428097	0.0121774	depleted
KRAS CDE Pos	SLC30A10	CACATCTGGGAACTTGTAAG	95.6701	117.867	1.29053	0	106.769	0.645263	0.00604357		KRAS CDE Neutral	OTUD4	TGATAAAGGCTCAATGTCTG	147.845	237.084	2.11831	2.56858	192.464	2.34345	0.012176	depleted
KRAS CDE Neg	CD200R1	TTTCAAAATTCAGAAGCGGA	95.0058	80.3298	0.430176	0.619709	87.6678	0.524942	0.00598786		KRAS CDE Neutral	SMOX	GCATCTCCACTGAACAACCA	64.2803	205.349	0.706104	2.56858	134.814	1.63734	0.0121452	depleted
KRAS CDE Neg	P2RY12	GGGGTGTAGGTAAAGTCCCC	168.087	142.642	0	1.85913	155.364	0.929564	0.00598312		KRAS CDE Pos	ATF6	GCAAGGACTGGCTGAGCAGA	47.1389	69.694	1.41221	0	58.4165	0.706104	0.0120874	depleted
KRAS CDE Pos	SLC6A4	GCGAGCTCCATGTAAAAGAG	91.6839	52.5522	0.860351	0	72.1181	0.430176	0.00596488		KRAS CDE Pos	NKTR	GAGGCAGAAGTTATAATCGG	77.1364	52.2705	0.706104	0.856194	64.7034	0.781149	0.0120728	depleted
KRAS CDE Neutral	PCDH9	GATCACAACAATGACCACCA	305.613	222.972	1.29053	1.85913	264.292	1.57483	0.00595866		KRAS CDE Neg	ZNF322	AAGTGTGAGTGTGAGTTGCC	44.9962	97.0738	0	1.71239	71.035	0.856194	0.0120531	depleted
KRAS CDE Neutral	APEH	ACACTTTGATGCAAGCCATG	72.417	104.354	0.430176	0.619709	88.3854	0.524942	0.00593925		KRAS CDE Neg	OR2L13	CCGAGGCCAGAAAGAATATG	156.415	44.8033	0.706104	1.71239	100.609	1.20925	0.0120192	depleted
NTC	NTC	CAATATCTAAGCGCTAACGA	81.0539	200.449	0.430176	1.23942	140.752	0.834797	0.005931		KRAS CDE Neutral	ACOX3	TCAGTGCTCTGTACGCCCTG	257.121	133.165	2.11831	2.56858	195.143	2.34345	0.0120089	depleted
KRAS CDE Pos	ICA1L	TTGTCTTCACTAATCTTGCT	221.902	309.307	1.29053	1.85913	265.605	1.57483	0.00592922		KRAS CDE Neg	EXOC3	CGGATACTGCGACACCATCG	400.681	250.152	3.53052	4.28097	325.416	3.90575	0.0120023	depleted
KRAS CDE Pos	SNRPF	GTGATGGTGAAACTTAAGTG	53.1501	19.5194	0.430176	0	36.3347	0.215088	0.00591962		KRAS CDE Neutral	ALOX15B	TGTACCCTCCTGCAGCACCA	546.383	598.622	0	13.6991	572.502	6.84956	0.0119642	depleted
KRAS CDE Neutral	RABEP1	GAGCATTTAGACAGCACCCG	58.4651	87.0866	0.860351	0	72.7758	0.430176	0.00591097		KRAS CDE Neutral	PRDM11	AACCGCTATAAGTCCATAGA	128.561	86.4953	0	2.56858	107.528	1.28429	0.0119438	depleted
KRAS CDE Pos	SYNJ1	GTGCCCCACAGAGCCACGCG	76.4032	238.737	0	1.85913	157.57	0.929564	0.00589936		KRAS CDE Neutral	CCDC58	AGTACATGAATTAAACACTA	184.27	340.381	2.82442	3.42478	262.325	3.1246	0.0119111	depleted
KRAS CDE Neutral	ARID3C	GCTCGAGTCTCGCACTCGTA	57.1363	48.0478	0	0.619709	52.592	0.309855	0.00589166		KRAS CDE Pos	CR1	GCTATCCATTTACATTCTCA	424.25	629.113	1.41221	11.1305	526.682	6.27137	0.0119073	depleted
KRAS CDE Neutral	CYP1A2	ACTCATGAGTGTTCTTCACG	312.257	369.367	2.15088	1.85913	340.812	2.005	0.00588302		KRAS CDE Neg	ACRBP	GCAGAAAGACTCAAACCAGG	29.9975	148.1	2.11831	0	89.0487	1.05916	0.0118941	depleted
KRAS CDE Neg	RDM1	CCTTCCTCCACCTTATCCAT	299.634	302.551	0.430176	3.09855	301.092	1.76436	0.00585987		KRAS CDE Neg	SNRPG	TATCATCATGTTAGAAGCCT	492.816	647.159	0.706104	12.8429	569.987	6.77451	0.0118854	depleted
KRAS CDE Neg	IDH3A	TTGTGTGCAGGATTGATCGG	29.2325	44.294	0.430176	0	36.7633	0.215088	0.00585061		KRAS CDE Neutral	GNPNAT1	GAATGCAGAGGAAAGCAGCT	8.57071	63.4714	0	0.856194	36.021	0.428097	0.0118846	depleted
KRAS CDE Neutral	ZNF195	CATTGAGGCCTGGCTGGGCA	79.0607	174.173	0.860351	0.619709	126.617	0.74003	0.00584464		KRAS CDE Pos	DEPDC1B	GCTGTCTGCGGTGGACAAGA	362.112	321.713	2.11831	5.99336	341.913	4.05584	0.0118622	depleted
KRAS CDE Pos	TRIM24	CCTCGGCTGCGGCCTCCGGG	79.7251	132.882	0	1.23942	106.304	0.619709	0.00582962		KRAS CDE Neutral	SDHC	TTACAGTTGGTCTCTTCCCA	428.535	294.955	0	8.56194	361.745	4.28097	0.0118342	depleted
KRAS CDE Neg	PAX1	CACATCCGGGACTACAAGCA	110.286	185.434	1.7207	0	147.86	0.860351	0.00581867		KRAS CDE Pos	C5orf46	AAGTACTGAGACAGCCATTC	62.1376	70.3163	0.706104	0.856194	66.227	0.781149	0.011795	depleted
KRAS CDE Pos	MUC17	GCCTGAGTAGAAGTGGTCAG	364.742	242.491	0.430176	3.09855	303.617	1.76436	0.00581115		KRAS CDE Pos	SCRG1	GTATCTTTCTGTAGCAAGAG	272.12	138.766	1.41221	3.42478	205.443	2.41849	0.0117721	depleted
KRAS CDE Neutral	GHR	AGATATTCAGAAAGGATGGA	141.512	178.678	0	1.85913	160.095	0.929564	0.00580633		KRAS CDE Neg	PGBD1	CTGTCCCTGAATATAGACAG	59.9949	0	0.706104	0	29.9975	0.353052	0.0117694	depleted
KRAS CDE Neg	CEP250	AGCGCCACAATGTCCAGCTG	126.896	87.0866	0	1.23942	106.991	0.619709	0.00579215		KRAS CDE Neg	EXOSC8	AAAGAGAACTGCCGTCCTGA	175.699	321.713	0.706104	5.13717	248.706	2.92164	0.0117473	depleted
KRAS CDE Pos	NAGK	TCTGAGCGGTGGGGACCAGG	67.102	40.5403	0	0.619709	53.8211	0.309855	0.00575712		KRAS CDE Neutral	NKX2-5	GCTGAAACTCACGTCCACGC	32.1401	28.0021	0.706104	0	30.0711	0.353052	0.0117406	depleted
KRAS CDE Pos	PTGIR	GCGCGCATAGGCCACGAACA	174.731	190.69	0.860351	1.23942	182.71	1.04988	0.00574618		KRAS CDE Neutral	TAS2R19	TAAACACAGTTGCATACCAA	64.2803	8.71176	0	0.856194	36.496	0.428097	0.01173	depleted
KRAS CDE Neg	KAT6A	TTATATGTAGACAATCAGGA	95.6701	120.119	0	1.23942	107.895	0.619709	0.00574365		KRAS CDE Neutral	TIPARP	GATTGGGAACTGGAACCCTG	17.1414	56.0041	0	0.856194	36.5728	0.428097	0.0117054	depleted
KRAS CDE Neutral	PFKFB2	TTCATCAAGGTGATAAACGT	25.2463	157.657	0.430176	0.619709	91.4515	0.524942	0.00574012		KRAS CDE Pos	SLC24A2	GTAAGAGAATACTGCAATCC	182.128	145.611	2.11831	1.71239	163.869	1.91535	0.0116883	depleted
KRAS CDE Pos	FEZ2	GAAAGCCGATCTGACTGTGT	478.351	436.184	2.15088	3.09855	457.267	2.62471	0.00574		KRAS CDE Neutral	UBN1	TATGGCCCCTTCTAAAATCA	104.991	115.742	0	2.56858	110.367	1.28429	0.0116366	depleted
KRAS CDE Neutral	PCDHA6	GTCAGGAATAAGTTGTGTGC	375.372	248.497	1.7207	1.85913	311.935	1.78992	0.00573811		KRAS CDE Pos	OR2D3	GATATCTGTGTTCTATACAG	203.554	200.37	2.11831	2.56858	201.962	2.34345	0.0116034	depleted
KRAS CDE Neutral	NAAA	GGCTATGTAGGATTATGGAC	23.9175	51.0507	0.430176	0	37.4841	0.215088	0.0057381		KRAS CDE Neg	ZMYND15	GTCACTGAAGATCCACGTGG	186.413	191.659	3.53052	0.856194	189.036	2.19336	0.0116029	depleted
KRAS CDE Neg	C2orf16	GATTTGCAGAGAGATCCCCA	69.7595	146.396	0	1.23942	108.077	0.619709	0.00573393		KRAS CDE Neutral	RABL2A	GATGGTCTTGCCATCTACCG	387.824	374.605	2.82442	5.99336	381.215	4.40889	0.0115654	depleted
KRAS CDE Pos	GIPC1	GCTCACCATCACGGACAACG	85.7045	22.5224	0	0.619709	54.1134	0.309855	0.00572602		KRAS CDE Neutral	SOS2	GCCTTACGAGTTCTTCAGCG	0	74.0499	0	0.856194	37.025	0.428097	0.0115624	depleted
NTC	NTC	AATGAAGCACCGATTGCGGA	100.321	116.366	0	1.23942	108.343	0.619709	0.00571987		KRAS CDE Neg	OR5T2	TCTGAGTATGTTGTCTTCTG	604.235	555.063	1.41221	11.9867	579.649	6.69947	0.0115578	depleted
KRAS CDE Pos	CCNG2	TGCTTCTGACATAAAACGGA	142.841	149.399	0.430176	1.23942	146.12	0.834797	0.00571311		KRAS CDE Neutral	SLC9B1	AATAGAAATGCCCATTGCCA	36.4255	98.9407	0.706104	0.856194	67.6831	0.781149	0.0115413	depleted
KRAS CDE Pos	HIST3H2A	GGGCAACTATTCGGAGCGCG	87.0332	96.8463	0.430176	0.619709	91.9398	0.524942	0.00570963		NTC	NTC	TCGCTAAGCCGGGTAATACT	77.1364	58.4932	0.706104	0.856194	67.8148	0.781149	0.0115189	depleted
KRAS CDE Pos	RFX4	CCTCTACAAAGCTATCTCCG	118.259	99.0985	0	1.23942	108.679	0.619709	0.00570221		KRAS CDE Neutral	NCALD	TCGCCTTGAGTGTAACTTCG	74.9937	74.6722	0	1.71239	74.8329	0.856194	0.0114414	depleted
KRAS CDE Neutral	VPS26A	TTGTTGATGAGGAAGACCGG	120.252	30.7806	0.860351	0	75.5163	0.430176	0.00569646		KRAS CDE Neutral	TEX29	GTAGATGATGGTGATGACGA	72.851	154.323	0	2.56858	113.587	1.28429	0.0113067	depleted
KRAS CDE Neutral	C14orf159	TAATCGTTGACCAGAGAGCC	342.154	244.743	0.860351	2.47884	293.448	1.66959	0.00568957		KRAS CDE Pos	GRB2	CGACGAGCTGAGCTTCAAAA	205.697	70.9386	1.41221	1.71239	138.318	1.5623	0.011295	depleted
KRAS CDE Pos	FEM1B	GCTTGGCTATGTCAGCCAGC	83.7114	134.384	0	1.23942	109.047	0.619709	0.00568293		KRAS CDE Neutral	AT5L2	GGGAGGAACCAGCTCAACCG	64.2803	152.456	0.706104	1.71239	108.368	1.20925	0.0111587	depleted
KRAS CDE Neutral	ZBBX	CTTGCTTTCAAGTGATACAC	57.8007	18.0179	0.430176	0	37.9093	0.215088	0.00567375		KRAS CDE Neg	ZNF266	GAGTCTAGGACAGTGCAGAG	23.5694	130.054	0	1.71239	76.8118	0.856194	0.0111467	depleted
KRAS CDE Neutral	SENP8	GTTACATGGACAGTCTACTG	37.8694	38.2881	0.430176	0	38.0787	0.215088	0.0056485		KRAS CDE Pos	B3GAT1	GGGTGACAAGTTCTCGAAGG	68.5656	121.965	2.11831	0	95.2651	1.05916	0.011118	depleted
KRAS CDE Neg	REV3L	TCCTCGCGAAGTGAACCTGA	41.8557	68.3179	0	0.619709	55.0868	0.309855	0.00562484		KRAS CDE Pos	CBWD1	TTACATCTTCTTCTGGAACC	87.8497	39.2029	1.41221	0	63.5263	0.706104	0.0111151	depleted
KRAS CDE Neutral	HAL	CTATAGGTGCTAGAAGCCCA	100.321	86.3358	0.430176	0.619709	93.3283	0.524942	0.00562469		KRAS CDE Neutral	PTMS	GCGAAAGAAAGAAGTGGTGG	29.9975	33.6025	0.706104	0	31.8	0.353052	0.0111023	depleted
KRAS CDE Neg	CINP	TCTTACCAACCCATCCAAGG	21.9244	88.5881	0	0.619709	55.2562	0.309855	0.0056076		KRAS CDE Neutral	SLC27A3	TGGACTGACAGAGGGCAACG	25.7121	115.12	0.706104	0.856194	70.4159	0.781149	0.0110934	depleted
KRAS CDE Pos	C6orf223	GCTCTGACCATCAGTAAGGT	283.689	126.876	0.430176	1.85913	205.282	1.14465	0.00557599		KRAS CDE Neutral	AXIN2	TTTGCTGGACAAGCCAACCA	102.848	165.523	2.11831	0.856194	134.186	1.48725	0.0110835	depleted
NTC	NTC	CGGCCGTAGTGACGAATGGA	55.1432	56.306	0	0.619709	55.7246	0.309855	0.00556047		KRAS CDE Neutral	GMPS	GTAGGAGGTTCTTTAACTGG	212.125	197.881	2.82442	1.71239	205.003	2.2684	0.0110652	depleted
KRAS CDE Pos	CYP1B1	GTAGCGGCAGCCGAAACACA	318.236	394.893	0.860351	3.09855	356.564	1.97945	0.00555145		KRAS CDE Neutral	SLC27A3	AGTTGTCTGGGTCAAGAGGT	115.705	39.2029	0	1.71239	77.4537	0.856194	0.0110543	depleted
KRAS CDE Neutral	RTN4RL2	CTGCCCGGCAACATCTTCCG	51.1569	138.137	0.430176	0.619709	94.6471	0.524942	0.00554631		KRAS CDE Neg	ATP6V1C1	TCTGGCTTATATCTGCTCCT	464.961	451.767	0.706104	9.41814	458.364	5.06212	0.0110439	depleted
KRAS CDE Neutral	IPO8	AAAACAAGTTGAACGAAGAG	55.8076	133.633	0.430176	0.619709	94.7202	0.524942	0.00554203		KRAS CDE Neg	SLC16A12	TTACTGACAACACTCCCAAG	107.134	35.4693	0.706104	0.856194	71.3016	0.781149	0.0109556	depleted
KRAS CDE Neutral	OGFR	GGACATTCTTCAGAACTGGA	49.8282	62.3119	0	0.619709	56.0701	0.309855	0.0055262		KRAS CDE Pos	TSC22D4	TGGTGGGGAGCCATTCCGGG	27.8548	36.7138	0.706104	0	32.2843	0.353052	0.0109357	depleted
KRAS CDE Pos	RFX4	GGAGAACTATGAGATTGCAG	35.2119	77.3269	0	0.619709	56.2694	0.309855	0.00550663		KRAS CDE Pos	OBSCN	GCACACGCTCACCATCCGGG	124.275	97.0738	0.706104	1.71239	110.675	1.20925	0.0109261	depleted
KRAS CDE Pos	RCN2	GATTATGACAAAGATAACGA	188.683	124.624	1.7207	0	156.653	0.860351	0.00549207		KRAS CDE Neutral	NKX2-5	GTAGGCACGTGGATAGAAGG	38.5682	26.1353	0.706104	0	32.3517	0.353052	0.0109129	depleted
KRAS CDE Pos	ZIC1	TGTGGAGGGAGACACGATGG	61.787	51.0507	0	0.619709	56.4189	0.309855	0.00549204		KRAS CDE Neg	DNAJC22	AAAGGCTAATCAGTGCCACA	632.09	596.133	1.41221	11.9867	614.111	6.69947	0.0109092	depleted
KRAS CDE Pos	TRIM24	CTTCTGGTTTAGATAAGTCT	199.977	226.725	1.7207	0.619709	213.351	1.17021	0.00548488		KRAS CDE Pos	ZNF408	CGCCAAGGAACAGCGCTTGG	509.957	339.758	0.706104	8.56194	424.858	4.63402	0.0109072	depleted
KRAS CDE Neg	HSP90B1	CGGATGATGAAGTAGTACAG	57.8007	21.0209	0.430176	0	39.4108	0.215088	0.00545759		KRAS CDE Pos	RAPGEF3	GGGCCAGTCGGTATACCCGG	109.277	112.631	0.706104	1.71239	110.954	1.20925	0.0108987	depleted
KRAS CDE Neutral	ACOX3	CCAGGCACTGAATCAAGGCG	63.1157	15.7657	0.430176	0	39.4407	0.215088	0.00545345		KRAS CDE Pos	ROBO3	AGATGGGGCATGTCAGTTGG	10.7134	54.1373	0.706104	0	32.4254	0.353052	0.0108881	depleted
KRAS CDE Neutral	TAS2R19	GTAAACATCTCAAGAAGATG	96.9989	60.8104	0.860351	0	78.9047	0.430176	0.00545184		KRAS CDE Neutral	PTP4A2	GCACTTGCTTTGATTGAATG	524.956	340.381	0	9.41814	432.668	4.70907	0.0108838	depleted
KRAS CDE Pos	ATXN7L2	TCCACTCAGTACACCAGCGC	77.732	114.864	0.430176	0.619709	96.2981	0.524942	0.00545122		KRAS CDE Neutral	NFKBIB	TATCCACAAAGATGTGGAGA	2.14268	76.539	0	0.856194	39.3408	0.428097	0.0108818	depleted
KRAS CDE Neg	LTF	ACGAACTCACTATTATGCCG	64.4445	207.957	0.860351	0.619709	136.201	0.74003	0.00543339		KRAS CDE Pos	LGALS2	GATGCTGCCTGTGATCTTCA	437.106	924.068	2.82442	11.9867	680.587	7.40557	0.0108811	depleted
KRAS CDE Pos	TNFSF18	TTAAGCCATTCAAGAACTCA	200.642	37.5373	1.29053	0	119.089	0.645263	0.00541831		KRAS CDE Pos	EREG	CCATCTGCAGAAATAATATG	447.819	558.175	4.94273	5.99336	502.997	5.46804	0.0108709	depleted
KRAS CDE Neutral	CROT	GCACAGTTGAAGCAGTGAGG	63.7801	95.3448	0.860351	0	79.5624	0.430176	0.00540677		KRAS CDE Pos	RCN2	GTTAGTTTGGAAGAATTTCT	222.838	51.6483	2.11831	0.856194	137.243	1.48725	0.0108366	depleted
KRAS CDE Pos	PRTN3	CAGCAGCAAGGCCAGCAGCA	77.0676	117.116	0.430176	0.619709	97.092	0.524942	0.00540665		KRAS CDE Neg	P2RY12	ATGTGAAAGAGAGCACTCTG	23.5694	41.692	0.706104	0	32.6307	0.353052	0.0108196	depleted
KRAS CDE Pos	GPN3	TCTTCATCTGACTGATCGTA	89.0264	219.969	0.430176	1.23942	154.498	0.834797	0.0054033		KRAS CDE Neg	DHX8	TGTACACAGCTAGCAGGGTG	154.273	135.032	1.41221	1.71239	144.652	1.5623	0.0108004	depleted
KRAS CDE Neutral	ITGBL1	AGAGACTGCGACAAACATGA	87.0332	107.357	0.430176	0.619709	97.195	0.524942	0.00540092		KRAS CDE Neutral	UGT2B4	CAAGGGAGCAGCTGTTAGTT	44.9962	20.5349	0.706104	0	32.7655	0.353052	0.0107751	depleted
KRAS CDE Neg	POP1	GCTCTCAGAAGGGTCACCCG	77.732	37.5373	0	0.619709	57.6346	0.309855	0.00537619		KRAS CDE Pos	BTNL9	GTTCAGTCTGGAAACATCTG	402.823	271.309	2.11831	5.13717	337.066	3.62774	0.0107627	depleted
KRAS CDE Neg	EIF3H	AATGAGCAGCGAGTCCATCC	71.7526	43.5433	0	0.619709	57.6479	0.309855	0.00537495		KRAS CDE Neutral	CASP6	ACTTAACACTGCCAGAAAGG	1122.76	1919.7	3.53052	29.1106	1521.23	16.3206	0.0107285	depleted
KRAS CDE Neg	C3orf56	CTGCCTTGGTGCCTTCAGTG	160.779	231.23	0.860351	1.23942	196.004	1.04988	0.00535643		KRAS CDE Neutral	C14orf159	GGCTCATGATTGAAATGTGT	44.9962	100.807	0.706104	0.856194	72.9018	0.781149	0.0107151	depleted
KRAS CDE Neg	WRAP53	TGAGAAGAAGCGGTTGCCAT	113.608	162.912	0.860351	0.619709	138.26	0.74003	0.00535245		KRAS CDE Pos	GPR158	TGGAATCAAAAGCAACCCAA	27.8548	52.2705	0	0.856194	40.0627	0.428097	0.0106857	depleted
NTC	NTC	GTATCCTCCTTACGGCCCGT	19.9313	221.47	1.29053	0	120.701	0.645263	0.00534598		KRAS CDE Neutral	RGMA	AGGGGCAGGACGTTCAGCCC	124.275	220.283	2.82442	0.856194	172.279	1.84031	0.0106821	depleted
KRAS CDE Neutral	INHBB	GGTGTCCTGCGAGCCACCCG	69.7595	91.591	0.860351	0	80.6753	0.430176	0.00533219		KRAS CDE Neg	TRIM49C	AGCTCTGAGGAGCAAATGTG	74.9937	5.60041	0	0.856194	40.297	0.428097	0.0106235	depleted
KRAS CDE Neg	EXOSC8	TTATGGTCTGCTGTAACCGC	122.91	109.609	0	1.23942	116.259	0.619709	0.00533041		KRAS CDE Neutral	KCNAB3	TTAGGGCTGAAAGAACCCTA	25.7121	135.654	0	1.71239	80.6833	0.856194	0.0106118	depleted
KRAS CDE Neg	DDX23	TGCCTCATCCAGAACCACAT	144.834	132.882	0.860351	0.619709	138.858	0.74003	0.0053294		KRAS CDE Pos	ATXN7L2	GGCACCTCAGCACACACATG	214.268	270.064	0	5.13717	242.166	2.56858	0.0106067	depleted
KRAS CDE Neutral	UGT2B4	CCAAATGTTGAGTTCGTTGG	231.203	163.663	0.860351	1.23942	197.433	1.04988	0.00531768		KRAS CDE Neutral	TLE4	GTGTTCTCCAGGCATTCAGA	325.687	454.256	1.41221	6.84956	389.971	4.13088	0.0105928	depleted
KRAS CDE Pos	ZNF799	AGTTGTTTCGTGTCTTCGAA	700.917	348.346	0	5.57738	524.631	2.78869	0.00531553		KRAS CDE Neutral	ADRB1	GGTCGGGCACCAGCTCGCGG	17.1414	197.259	1.41221	0.856194	107.2	1.1342	0.0105802	depleted
KRAS CDE Pos	EBF3	ATTCAGGAGAATATTCCGCG	64.4445	16.5164	0.430176	0	40.4804	0.215088	0.00531338		KRAS CDE Neutral	NAGPA	GCACCCGTGTGCAGTCCCGG	147.845	148.1	1.41221	1.71239	147.972	1.5623	0.010558	depleted
KRAS CDE Pos	MRGPRX4	GCATCTTCCGGGATCCACAG	110.286	123.122	0	1.23942	116.704	0.619709	0.00531008		KRAS CDE Neutral	RP1L1	TTTCATGGCTGGGGTTCTGA	96.4204	187.303	2.11831	0.856194	141.862	1.48725	0.0104838	depleted
KRAS CDE Pos	AGFG1	GCTCATGGATGCAGTGCCAA	1.32875	115.615	0	0.619709	58.4718	0.309855	0.00529921		KRAS CDE Neg	STAT5A	GTTCATTGTACAGAATGTGC	130.703	18.668	0.706104	0.856194	74.6857	0.781149	0.0104592	depleted
KRAS CDE Neutral	CXCR5	CTACCCGCTAACGCTGGAAA	96.3345	21.0209	0	0.619709	58.6777	0.309855	0.00528062		KRAS CDE Neutral	C14orf93	ATACTCACAGGATTGAGCAG	156.415	171.124	0	3.42478	163.77	1.71239	0.0104561	depleted
KRAS CDE Neutral	ODF2L	TGACTTTCACTGGTACACCG	104.307	94.594	0.430176	0.619709	99.4505	0.524942	0.00527843		KRAS CDE Pos	ZNF408	GGTGAGACTTGGGCCCTCAG	175.699	137.521	0.706104	2.56858	156.61	1.63734	0.0104549	depleted
KRAS CDE Neg	DCTN6	TTATTGGTGCCAATGATCAT	68.4307	130.63	0.430176	0.619709	99.5303	0.524942	0.0052742		KRAS CDE Pos	EMB	CCCTGGCCTCCAGCAGGCCG	53.5669	81.5171	1.41221	0	67.542	0.706104	0.0104543	depleted
KRAS CDE Neutral	AXIN2	GTAAGTGACAACCAACTCAC	59.7938	139.639	0.430176	0.619709	99.7163	0.524942	0.00526436		KRAS CDE Neutral	PFDN6	AAGTTTCTGCCTCCCCGACA	242.122	355.937	2.82442	3.42478	299.03	3.1246	0.0104491	depleted
KRAS CDE Neg	CSGALNACT2	TCATGAGAGGTCCAAAAGGG	130.218	105.855	0	1.23942	118.036	0.619709	0.00525015		KRAS CDE Neutral	TIPARP	TCCTGAAGAATGAATTGTGG	2.14268	215.927	1.41221	0.856194	109.035	1.1342	0.0104022	depleted
KRAS CDE Neg	ITGAM	ATATGACAGTCTGGTTCAGC	37.8694	80.3298	0	0.619709	59.0996	0.309855	0.00524292		KRAS CDE Pos	PHC2	TTGGTATCCTTGGTAAGTGG	707.083	598	0.706104	12.8429	652.542	6.77451	0.0103817	depleted
KRAS CDE Neg	IGFL2	AGACAGACTGACACATAAGC	138.855	25.5254	0.860351	0	82.19	0.430176	0.00523392		KRAS CDE Neutral	TAS2R19	TAACCATGGATGAGAGAGTG	0	82.7617	0	0.856194	41.3808	0.428097	0.0103453	depleted
KRAS CDE Neutral	EMILIN3	ACAGTCTCTACACGACGGGA	110.951	126.125	0	1.23942	118.538	0.619709	0.00522793		KRAS CDE Neg	OLA1	TCATGATTGGAATGACAAAG	14.9987	53.5151	0.706104	0	34.2569	0.353052	0.010306	depleted
KRAS CDE Neg	EIF3H	TTCTTCAAACATGTACTCAA	77.0676	5.25522	0.430176	0	41.1614	0.215088	0.00522547		KRAS CDE Neg	FURIN	CCAGTCATTAAACCCATCTG	284.976	238.329	2.82442	2.56858	261.652	2.6965	0.0103057	depleted
KRAS CDE Neg	LTF	GGACCCGTCCAATTCAAGAA	219.244	219.969	0.430176	1.85913	219.606	1.14465	0.00521229		KRAS CDE Pos	PDZRN3	GCACCTGGCCGCAACCCGCG	68.5656	0	0.706104	0	34.2828	0.353052	0.0102982	depleted
KRAS CDE Pos	ETF1	GAAGGGTCTCAGTTTGTGAA	108.293	213.212	0.430176	1.23942	160.753	0.834797	0.00519305		KRAS CDE Neg	SLCO4C1	GCTATTGGCTATGTATTGGG	149.987	153.7	1.41221	1.71239	151.844	1.5623	0.0102889	depleted
KRAS CDE Neutral	MAFG	AGGCTGGTGCCATTCTCACC	167.423	190.69	0	1.85913	179.056	0.929564	0.00519147		KRAS CDE Neutral	PFDN6	TAAGTAAATCCATGTCGGGG	89.9924	47.2924	1.41221	0	68.6424	0.706104	0.0102867	depleted
KRAS CDE Pos	MCL1	GCTTGAGGAGATGGAAGCCC	46.5063	36.7866	0.430176	0	41.6464	0.215088	0.00516461		KRAS CDE Neg	BCAR1	ATACATAGCCCTGCCCCACG	51.4242	85.873	1.41221	0	68.6486	0.706104	0.0102858	depleted
KRAS CDE Pos	RPL13A	GTGGTGGTCGTACGCTGTGA	136.197	30.7806	0.860351	0	83.4888	0.430176	0.00515249		KRAS CDE Neutral	MOK	CCATTGCGTGCAGGAGGGAG	102.848	147.478	0	2.56858	125.163	1.28429	0.010261	depleted
KRAS CDE Pos	CDK5R2	GCCTGCACGATGACCCGCCG	60.4582	60.0597	0	0.619709	60.259	0.309855	0.00514205		KRAS CDE Pos	TSC22D4	CTTCACCACCCGGAAACGGG	64.2803	88.3621	0.706104	0.856194	76.3212	0.781149	0.010235	depleted
KRAS CDE Pos	ETF1	GTGGATCTCCCAAAGAAACA	292.325	431.679	0	3.71826	362.002	1.85913	0.00513568		KRAS CDE Neg	XYLT1	CAGGACAAATGACCAGTTGG	164.986	209.704	2.11831	1.71239	187.345	1.91535	0.0102236	depleted
KRAS CDE Neg	SLC2A13	CCAAAAAACTGTATAACCGC	29.2325	91.591	0	0.619709	60.4118	0.309855	0.00512904		KRAS CDE Neg	MAP3K2	AAACAGCTCCTCCGATTCCG	370.683	202.859	0.706104	5.13717	286.771	2.92164	0.010188	depleted
KRAS CDE Pos	RPL13A	CCATCTCCTGGGCCGCCTGG	75.0745	9.00895	0.430176	0	42.0417	0.215088	0.00511606		KRAS CDE Neg	MAP3K2	TCAACAGGCAACGTCAAACT	74.9937	177.346	0	2.56858	126.17	1.28429	0.0101791	depleted
KRAS CDE Pos	CR1	GCTTTAGAATTATCCAAGAG	162.108	80.3298	0	1.23942	121.219	0.619709	0.00511232		KRAS CDE Neutral	SLC1A2	TATGTTAATAGCCTTCCCAG	424.25	390.162	1.41221	6.84956	407.206	4.13088	0.0101445	depleted
KRAS CDE Pos	OR2D3	GCAAGTCCTGTGAAAGACCC	295.647	120.119	0.860351	1.23942	207.883	1.04988	0.00505036		KRAS CDE Neg	BCAR1	ATAGATGTCCTGTGGCCCCG	244.265	287.488	2.82442	2.56858	265.877	2.6965	0.0101419	depleted
KRAS CDE Pos	YIPF5	TCACTGCAAAGCTGGAAAGT	215.258	371.619	1.7207	1.23942	293.439	1.48006	0.00504385		KRAS CDE Pos	SLC35D3	GACGGCGATGACGTACTGCG	402.823	328.558	1.41221	5.99336	365.69	3.70278	0.0101255	depleted
KRAS CDE Pos	C5orf52	CTACGCCGATTTCTGGGCGG	136.197	109.609	0	1.23942	122.903	0.619709	0.00504226		KRAS CDE Neutral	ACOX3	GAGTCCAGAACAAAGTCAGG	83.5644	70.9386	0.706104	0.856194	77.2515	0.781149	0.0101118	depleted
KRAS CDE Neg	SNRPG	CCTTGTGATAGATGAATGTG	125.567	206.455	0.430176	1.23942	166.011	0.834797	0.00502856		KRAS CDE Pos	PRSS16	ATACTCGGAGAAATCCAGCA	404.966	359.671	0	7.70575	382.318	3.85287	0.0100777	depleted
KRAS CDE Neutral	INS	CTGGTAGAGGGAGCAGATGC	32.5544	90.8403	0	0.619709	61.6974	0.309855	0.00502217		KRAS CDE Neutral	EDN1	CTAGGGCTTCCAAGTCCATA	83.5644	71.5608	0.706104	0.856194	77.5626	0.781149	0.0100712	depleted
KRAS CDE Neutral	RGMA	GCTACGCCCTGTGCACGCGG	170.08	87.0866	1.29053	0	128.583	0.645263	0.00501825		KRAS CDE Neutral	NAGPA	GCAGTAGCAAGTCGTCGTCG	32.1401	52.8928	0	0.856194	42.5165	0.428097	0.010069	depleted
KRAS CDE Neutral	ZNF730	CCCTACCAATGTGAGAAATG	82.3826	41.291	0	0.619709	61.8368	0.309855	0.00501084		NTC	NTC	ATTCCGTTTGCAGCGAGACC	147.845	177.969	0.706104	2.56858	162.907	1.63734	0.0100508	depleted
KRAS CDE Pos	CYP2D6	GCTGGGTCAGGAAAGCCTTT	145.498	102.101	0	1.23942	123.8	0.619709	0.00500573		KRAS CDE Neg	BMPR1A	GATGAAGCATTTATTCCAGT	96.4204	44.181	1.41221	0	70.3007	0.706104	0.010044	depleted
KRAS CDE Neutral	CABP1	GGTGGGACACCGAGACATAG	238.511	181.681	0.860351	1.23942	210.096	1.04988	0.00499717		KRAS CDE Neg	ARID3B	ACAGTGGAATTATTGACCCA	49.2816	107.652	0.706104	0.856194	78.467	0.781149	0.00995513	depleted
KRAS CDE Neg	RPAP1	AGATCCTGCAGGAACAGCAG	61.1226	63.0627	0	0.619709	62.0926	0.309855	0.0049902		KRAS CDE Pos	CDK7	GCCTCACCTGTCCCTCCCCA	126.418	46.0478	0	1.71239	86.2329	0.856194	0.00992886	depleted
KRAS CDE Pos	NAT16	TTCCGGCTTAGGGACCTCTG	31.2257	93.0925	0	0.619709	62.1591	0.309855	0.00498486		KRAS CDE Pos	CCDC3	AATTATAACCTCTTGCCTCA	74.9937	97.6961	0	1.71239	86.3449	0.856194	0.00991598	depleted
KRAS CDE Neg	ZFP3	GAACTAATTCAAGCCTTCGA	124.238	249.248	0	1.85913	186.743	0.929564	0.00497777		KRAS CDE Pos	KIF17	GCTGCTTCGCGAGTACCAGG	244.265	244.551	1.41221	3.42478	244.408	2.41849	0.0098953	depleted
KRAS CDE Neutral	CABLES2	CCATGTACGACGCAAAGATG	83.7114	89.3388	0.860351	0	86.5251	0.430176	0.00497169		KRAS CDE Neutral	CROT	GCACAGTTGAAGCAGTGAGG	72.851	13.6899	0	0.856194	43.2705	0.428097	0.00989352	depleted
KRAS CDE Neutral	EDN1	TGACCCAAATGATGTCCAGG	39.8626	84.8343	0	0.619709	62.3484	0.309855	0.00496973		NTC	NTC	CATCGAGGGTAAACGCCATT	96.4204	236.462	0.706104	2.56858	166.441	1.63734	0.00983737	depleted
KRAS CDE Pos	TRAF3IP1	TGAAGAGGATGATCAATTTG	138.855	159.158	0.860351	0.619709	149.006	0.74003	0.00496643		KRAS CDE Neutral	ZNF133	TCAGCAGCCTCCACTCATCC	79.279	326.069	1.41221	2.56858	202.674	1.9904	0.00982069	depleted
KRAS CDE Neutral	EMILIN3	CACATTCCTGTGCACCACAT	166.758	169.669	0.430176	1.23942	168.214	0.834797	0.00496272		KRAS CDE Pos	CDKN1C	ACGCCTGCAGTGGACCGAAG	287.119	103.297	2.11831	1.71239	195.208	1.91535	0.00981186	depleted
KRAS CDE Neutral	MAFG	CGCGGTTCTTGAGCGTGCGC	63.7801	61.5612	0	0.619709	62.6706	0.309855	0.00494418		KRAS CDE Neutral	RABEP1	CTAAGGAATGAACTGAGCCA	368.54	415.053	4.23662	3.42478	391.797	3.8307	0.00977727	depleted
KRAS CDE Neg	KAT8	ACATCCTGACTGAGGTGGAC	45.1776	81.0806	0	0.619709	63.1291	0.309855	0.00490827		KRAS CDE Neg	RNF103	TAGTGCAGAGAAGAAAGCTG	66.423	21.1571	0	0.856194	43.79	0.428097	0.00977613	depleted
KRAS CDE Neutral	ANP32A	GTAAGTTTGCGATTGAGGTG	73.7457	140.39	0.430176	0.619709	107.068	0.524942	0.0049029		KRAS CDE Pos	RCN2	CCGCAGCGACTACGACCGCG	74.9937	100.185	0	1.71239	87.5894	0.856194	0.00977509	depleted
NTC	NTC	CCTTAGACCGGGTGTACCTC	192.669	109.609	0.860351	0.619709	151.139	0.74003	0.00489636		KRAS CDE Neg	PTH	ATGGCTGCGTAAGAAGCTGC	81.4217	78.4058	0.706104	0.856194	79.9138	0.781149	0.0097749	depleted
KRAS CDE Pos	OBSCN	GTAGTCCTTGAACTTGTCTG	261.764	167.416	0.860351	1.23942	214.59	1.04988	0.00489251		KRAS CDE Neg	BZW1	TATCCAACTTTAGCCCCAGG	124.275	123.831	0.706104	1.71239	124.053	1.20925	0.0097478	depleted
KRAS CDE Pos	RERGL	CCAGTGAAGCTCACTTGTGA	53.1501	73.5731	0	0.619709	63.3616	0.309855	0.00489026		KRAS CDE Neutral	CABP1	AAGCACCAGTGAGCTGCGAG	87.8497	0	0	0.856194	43.9249	0.428097	0.00974612	depleted
KRAS CDE Neg	ARID3B	CAGCAATTGATGGCAACCGC	380.023	49.5493	0.860351	1.23942	214.786	1.04988	0.00488805		KRAS CDE Neg	PSMB10	CCATCCTCGAGCAGGTACCA	2.14268	70.3163	0.706104	0	36.2295	0.353052	0.00974488	depleted
KRAS CDE Neutral	LYZ	CGAGCTACAAACTACAATGC	108.293	18.7687	0	0.619709	63.531	0.309855	0.00487722		KRAS CDE Neg	VAPA	GATCAATCAGCTGATCGCCG	291.404	221.527	0.706104	4.28097	256.466	2.49354	0.00972269	depleted
KRAS CDE Neutral	SLC22A8	ACCAGAGTCCATACGCTGGT	37.2051	51.0507	0.430176	0	44.1279	0.215088	0.00487419		KRAS CDE Neg	EXOSC8	CGCTAGCAAAGCAAATGTGC	72.851	0	0.706104	0	36.4255	0.353052	0.00969244	depleted
KRAS CDE Pos	PPTC7	CAGCAACTCACAGTAGCTTG	97.6633	167.416	1.29053	0	132.54	0.645263	0.00486845		KRAS CDE Neutral	SRMS	GTGTCTGGATCTCCTTGGCG	499.244	194.148	0.706104	5.99336	346.696	3.34973	0.00966188	depleted
KRAS CDE Neg	SLC10A5	TCAGATTGTGGCATTGCCTG	261.1	209.458	0.430176	1.85913	235.279	1.14465	0.00486508		KRAS CDE Neutral	RABL2A	TGCAGGTGTTTGATATACAG	182.128	287.488	2.82442	1.71239	234.808	2.2684	0.00966068	depleted
KRAS CDE Pos	EN1	ATAACGTGTGCAGTACACCC	98.3276	29.2791	0	0.619709	63.8034	0.309855	0.0048564		KRAS CDE Pos	PTGIR	CGACAGCCTGGGTGAAGCAG	53.5669	108.897	0.706104	0.856194	81.2319	0.781149	0.00961628	depleted
KRAS CDE Neg	IYD	CTGGACCTTCGTGGTTGTGA	241.168	280.779	1.29053	1.23942	260.974	1.26497	0.00484713		KRAS CDE Pos	CRYAA	CTTCACGGTGAGGTCCTCCG	49.2816	39.8252	0	0.856194	44.5534	0.428097	0.00960864	depleted
KRAS CDE Pos	TNFSF9	GGGGGGCCTGAGCTACAAAG	37.2051	90.8403	0	0.619709	64.0227	0.309855	0.00483976		KRAS CDE Neg	MMAA	GAAAAATGCTTACTGAGAGA	66.423	96.4516	0.706104	0.856194	81.4373	0.781149	0.00959204	depleted
KRAS CDE Neutral	IKZF3	CAAGCAGAGAAGTTCCCTTG	335.51	270.269	0.430176	2.47884	302.889	1.45451	0.00480211		KRAS CDE Pos	SLC35B4	GAGGAGGTAGAACCACATGA	55.7096	108.897	0.706104	0.856194	82.3033	0.781149	0.00949111	depleted
KRAS CDE Pos	GRPEL2	GGGGGCCCAAGCTCATCAGG	116.93	102.101	0.430176	0.619709	109.516	0.524942	0.0047933		KRAS CDE Neutral	C3orf38	ACTTAAATATAACTTCTCGG	32.1401	42.3142	0.706104	0	37.2272	0.353052	0.00948371	depleted
KRAS CDE Neutral	ALOX15B	CTTCCAGGTGACGCTCCCGG	102.314	77.3269	0.860351	0	89.8204	0.430176	0.00478929		KRAS CDE Neutral	ODF2L	TAAAGCAGCTTCCAGTTGTC	171.414	85.873	0.706104	1.71239	128.644	1.20925	0.00939998	depleted
KRAS CDE Neg	UPK1A	TGAGGACCATGGACCGGCGG	100.985	28.5284	0	0.619709	64.7567	0.309855	0.0047849		NTC	NTC	CAGCTCACCCTGCGTACGGT	44.9962	121.342	0.706104	0.856194	83.1693	0.781149	0.00939228	depleted
KRAS CDE Pos	ATAD3A	GACGGTGCTCGGCCGCCTTC	300.298	99.0985	1.29053	0.619709	199.698	0.955118	0.00478281		KRAS CDE Neutral	CA8	TCTGTCACTAAGAGGCTGAG	0	75.2945	0.706104	0	37.6472	0.353052	0.0093779	depleted
KRAS CDE Neutral	ABCF3	TCAAAGATAACGGAGAACTA	74.4101	195.945	1.29053	0	135.177	0.645263	0.00477346		KRAS CDE Neutral	HADHA	TATTAACTATGGAGTCAAAG	104.991	136.899	1.41221	0.856194	120.945	1.1342	0.00937782	depleted
KRAS CDE Pos	RAPGEF3	GCCATGTTCTTCCAGCCGCA	75.0745	144.894	0.430176	0.619709	109.984	0.524942	0.00477289		KRAS CDE Neg	DUSP11	GCGGAAACCACATCCCCGAA	113.562	69.0718	0	1.71239	91.3168	0.856194	0.00937609	depleted
KRAS CDE Pos	TNFSF9	GCGGAGTCTCGGGCTGGCCG	66.4376	153.903	0.430176	0.619709	110.17	0.524942	0.00476483		KRAS CDE Pos	HOXD1	ATAAGTACTTAACTCGAGCC	186.413	71.5608	0.706104	1.71239	128.987	1.20925	0.00937496	depleted
KRAS CDE Neg	UPK1A	CAATCATGACGCGGTCCCAG	67.7663	62.3119	0	0.619709	65.0391	0.309855	0.00476413		KRAS CDE Neutral	KLB	TGGGACTGGAGCATTGCAAG	79.279	71.5608	1.41221	0	75.4199	0.706104	0.0093623	depleted
KRAS CDE Pos	MARVELD3	CCGGGGTCTCCCTTCCTCTG	119.588	141.14	0	1.23942	130.364	0.619709	0.00475368		KRAS CDE Pos	C6orf223	GCTCTGACCATCAGTAAGGT	194.984	63.4714	0.706104	1.71239	129.227	1.20925	0.0093575	depleted
KRAS CDE Neutral	DCAKD	CAAGTACATGAAGCACACCG	184.696	126.876	0.860351	0.619709	155.786	0.74003	0.00475029		KRAS CDE Neutral	PTP4A2	CTCATAGGAGATCTCCACAG	68.5656	23.0239	0	0.856194	45.7948	0.428097	0.00934816	depleted
KRAS CDE Pos	ZNF408	CTTTGCAGCTTGGTACAACG	182.039	170.419	0.430176	1.23942	176.229	0.834797	0.004737		KRAS CDE Pos	YIPF5	AAAGCAAGGCAAAAAACCAT	2.14268	89.6066	0	0.856194	45.8747	0.428097	0.00933189	depleted
NTC	NTC	GCTACAGATTTGCGTTCGAG	31.2257	99.8493	0	0.619709	65.5375	0.309855	0.0047279		KRAS CDE Pos	CDHR2	TTCCGTCTGGTCCGCGTCCC	94.2778	73.4277	0.706104	0.856194	83.8527	0.781149	0.00931573	depleted
KRAS CDE Pos	PRMT8	TAAAATAGGTGACCAGGGCG	65.7732	65.3149	0	0.619709	65.5441	0.309855	0.00472742		KRAS CDE Neg	RTN4RL1	GCCCATGACGGTCAGCTGCC	36.4255	131.299	0.706104	0.856194	83.8621	0.781149	0.00931469	depleted
KRAS CDE Neg	POLR1E	AAGAGCTTCATACTCCGCAG	73.7457	17.2672	0.430176	0	45.5064	0.215088	0.00472654		KRAS CDE Neg	SPG21	AATTGCAGAGGATTAGGGAA	40.7109	219.038	0.706104	1.71239	129.875	1.20925	0.00931087	depleted
KRAS CDE Neutral	ZNF141	TGCTATCTCTAACCCAGACC	242.497	202.701	0.860351	1.23942	222.599	1.04988	0.00471648		KRAS CDE Neutral	OTUD4	TCTTCAATACAGGAATGGGT	68.5656	191.659	0.706104	1.71239	130.112	1.20925	0.00929388	depleted
KRAS CDE Pos	ATXN7L2	CTGAAGGCCAACTCCCGCAA	160.115	153.903	0.860351	0.619709	157.009	0.74003	0.0047133		NTC	NTC	TACTGCGTACCGCAGTAAGC	347.114	185.436	4.94273	0	266.275	2.47136	0.00928125	depleted
KRAS CDE Pos	NOG	AGACCCTATCTTTGACCCCA	76.4032	146.396	0.430176	0.619709	111.399	0.524942	0.00471226		KRAS CDE Neutral	MTFR2	GGATCCCGAACTAGTCGCAA	368.54	355.937	0.706104	5.99336	362.239	3.34973	0.0092473	depleted
KRAS CDE Pos	FN1	TCGTTCCCACTCATCTCCAA	128.225	94.594	0.430176	0.619709	111.409	0.524942	0.00471184		KRAS CDE Neutral	GOLGB1	GTACAGGTAGTAGTGAACAC	321.401	138.766	4.23662	0	230.084	2.11831	0.0092067	depleted
KRAS CDE Pos	MAP2K2	GTAGGGTTGATGGTGAGCGC	77.0676	54.8045	0	0.619709	65.936	0.309855	0.00469932		KRAS CDE Neutral	DUOXA2	CTTCAGTGCAGAATGGTTCG	287.119	347.848	0.706104	5.13717	317.483	2.92164	0.00920248	depleted
KRAS CDE Neg	OR5T2	ATACTCAGAAAATAGTACAT	162.772	60.8104	0.430176	0.619709	111.791	0.524942	0.00469574		KRAS CDE Pos	INPP5F	CTTTGGCTTACCAAAAAGAG	66.423	26.7575	0	0.856194	46.5903	0.428097	0.00918856	depleted
KRAS CDE Pos	OR52E8	TGGTGGCTGTAGACAAGCCC	47.1707	84.8343	0	0.619709	66.0025	0.309855	0.00469459		KRAS CDE Pos	PEAK1	GAAGTGATTAGTAATGAAGG	484.245	449.278	0	8.56194	466.761	4.28097	0.00917165	depleted
KRAS CDE Neutral	NUDT5	GCAGATAATTGAGGAAGCCA	105.636	158.407	0	1.23942	132.022	0.619709	0.004694		KRAS CDE Neg	CEP250	AGCGCCACAATGTCCAGCTG	201.412	172.368	0	3.42478	186.89	1.71239	0.00916255	depleted
KRAS CDE Neutral	ST3GAL6	AAAGCTGGCTTTGATAAACA	15.2806	76.5761	0.430176	0	45.9284	0.215088	0.00468311		KRAS CDE Neg	NANOG	GATGGGGACTGAGAACAAGG	325.687	515.238	4.23662	3.42478	420.462	3.8307	0.00911068	depleted
KRAS CDE Neg	SEMA5B	GCAACAGCGAGACAGCCAGG	235.853	397.145	1.7207	1.23942	316.499	1.48006	0.00467635		KRAS CDE Pos	GRPEL2	CTCACCAGCAGTTCTCTGGG	179.985	224.017	2.82442	0.856194	202.001	1.84031	0.00911039	depleted
KRAS CDE Neg	BMPR1A	TGTGCCCTTGAATACCAGGG	110.286	115.615	0.430176	0.619709	112.951	0.524942	0.00464754		KRAS CDE Neutral	WFDC12	ACTAGGTATAGAGAAAGCAG	119.99	51.6483	0.706104	0.856194	85.8191	0.781149	0.00910228	depleted
KRAS CDE Neutral	MAFG	CCTTGGCCTGGAGGGCCACG	72.417	153.903	0.430176	0.619709	113.16	0.524942	0.00463894		KRAS CDE Neg	EXOSC8	TCTGCTGTAACCGCCGGTGG	62.1376	15.5567	0.706104	0	38.8472	0.353052	0.00908823	depleted
KRAS CDE Neg	ARNTL2	AGTGGCTCCTGCGATGGCGG	85.7045	99.8493	0.860351	0	92.7769	0.430176	0.00463667		KRAS CDE Neutral	AARD	GTAAAGTTCTAGCCAGCTGG	57.8523	98.3184	1.41221	0	78.0853	0.706104	0.00904272	depleted
KRAS CDE Pos	GH1	GCACTGCCCTCTTGAAGCCA	200.642	159.909	0.430176	1.23942	180.275	0.834797	0.00463068		KRAS CDE Neutral	OR3A3	TGACCAGATAGGCAAAGAGG	49.2816	45.4256	0	0.856194	47.3536	0.428097	0.00904044	depleted
KRAS CDE Neg	RPAP1	GGTGACATACCCAGGACCTG	4.65063	129.879	0	0.619709	67.2649	0.309855	0.00460649		KRAS CDE Neutral	RABEP1	GTTGGTATTAAAATACCGTG	156.415	0.622268	1.41221	0	78.5188	0.706104	0.0089928	depleted
KRAS CDE Neutral	RBCK1	CCTGGCTCCAGAGGGCCCCG	166.758	155.404	0.860351	0.619709	161.081	0.74003	0.00459414		KRAS CDE Neutral	C14orf159	AATACATCCAGCATGGCTGG	409.251	638.447	4.23662	5.13717	523.849	4.6869	0.00894703	depleted
KRAS CDE Neg	CDV3	GGTGATAACTGGGAAGAAGG	106.965	80.3298	0.860351	0	93.6472	0.430176	0.00459358		KRAS CDE Pos	MLYCD	GGACGAGCTGCTGCGCCGCG	111.419	142.499	1.41221	0.856194	126.959	1.1342	0.00893358	depleted
KRAS CDE Pos	DEPDC1B	TGAAGTGACCCGCAAACAAA	188.018	175.675	0.430176	1.23942	181.846	0.834797	0.00459067		KRAS CDE Neg	TRIM49C	GGTGGCTGAGAAAGAAACCC	115.705	218.416	2.11831	0.856194	167.06	1.48725	0.00890249	depleted
KRAS CDE Neg	MAP2K1	TGGCGAGATCAGTATCTGCA	134.868	93.8433	0.430176	0.619709	114.356	0.524942	0.00459043		KRAS CDE Pos	FRMD3	TTATCTTCCTCTTCACTAGG	40.7109	248.285	0	2.56858	144.498	1.28429	0.00888796	depleted
KRAS CDE Pos	FOXG1	CCGCAGCCCCCCCAGACGCG	146.827	175.675	0.860351	0.619709	161.251	0.74003	0.00458931		KRAS CDE Neg	ARNTL2	ACCAAGTCCTTCTGAAATGG	0	96.4516	0	0.856194	48.2258	0.428097	0.00887694	depleted
KRAS CDE Pos	CR1	GCCCGGCTACGACCTCAGAG	116.266	153.903	0	1.23942	135.084	0.619709	0.00458757		KRAS CDE Neutral	DGCR6	CAGGGCCAGGTCGCTCAGCG	0	79.6503	0.706104	0	39.8252	0.353052	0.00886505	depleted
KRAS CDE Pos	INPP5F	TATGGGTAAATCCGATCCCA	80.3895	54.8045	0	0.619709	67.597	0.309855	0.00458385		KRAS CDE Pos	NAGK	TGAAGATATAGCGGGAAAGG	44.9962	51.6483	0	0.856194	48.3222	0.428097	0.00885922	depleted
KRAS CDE Neg	AP4E1	TCTAAGATATATATGCAAGG	234.525	141.14	1.7207	0	187.832	0.860351	0.00458042		KRAS CDE Pos	FEZ2	GCGCTCCGTGATGGGCCGCA	57.8523	102.052	1.41221	0	79.9521	0.706104	0.00883158	depleted
KRAS CDE Neg	ABCD4	ACCCAGAACCCGGAGCAAGG	140.848	88.5881	0.430176	0.619709	114.718	0.524942	0.00457594		KRAS CDE Pos	GOLGA8O	CCAAGACTCACATCCCCAGG	104.991	88.9844	0	1.71239	96.9878	0.856194	0.00882786	depleted
KRAS CDE Neutral	ZNF141	CTTATGTATCTTCACATTGT	159.45	164.413	0.860351	0.619709	161.932	0.74003	0.00457001		KRAS CDE Pos	PHC2	TCAAGAAGAAGTATGCACAG	117.847	76.539	0	1.71239	97.1931	0.856194	0.00880921	depleted
KRAS CDE Pos	MRGPRX4	TGTCGGACTGACAGGAAACG	63.7801	72.0716	0	0.619709	67.9259	0.309855	0.00456166		KRAS CDE Neutral	UBN1	TGATGCTTGTCTAAACTGCA	336.4	260.108	3.53052	1.71239	298.254	2.62145	0.00878933	depleted
KRAS CDE Pos	DRAXIN	GGTGGTGAGAAAGAACATGG	40.5269	95.3448	0	0.619709	67.9359	0.309855	0.00456099		KRAS CDE Neg	CACNB3	ATACAGAGAGAAAATTGAGA	38.5682	42.3142	0.706104	0	40.4412	0.353052	0.00873001	depleted
KRAS CDE Neutral	PLCG2	TTCTGCAGCCTGAGAGCATG	174.066	56.306	0.430176	0.619709	115.186	0.524942	0.00455734		KRAS CDE Pos	EBF3	GTTTGGTCATTGAATCTATG	128.561	131.299	1.41221	0.856194	129.93	1.1342	0.00872935	depleted
KRAS CDE Pos	TMEM246	GAGTCCTTCCCTGTACAGTG	199.313	84.0836	1.29053	0	141.698	0.645263	0.00455379		KRAS CDE Pos	EBF3	ATTCAGGAGAATATTCCGCG	19.2841	61.6046	0.706104	0	40.4443	0.353052	0.00872933	depleted
KRAS CDE Pos	KIF17	TTGGGGTCCTCATTGATGCG	91.6839	97.597	0.860351	0	94.6404	0.430176	0.00454537		KRAS CDE Neutral	CXCR5	GCTCTTCTCATATTCCGCAA	381.396	484.747	0.706104	6.84956	433.072	3.77783	0.00872334	depleted
KRAS CDE Neutral	RAB3IL1	TTCTAGCTGCTCCCGCACCT	339.496	259.007	0.860351	1.85913	299.252	1.35974	0.0045438		KRAS CDE Neg	MMAA	GCAGCATCCACTTTGTACAA	96.4204	65.9604	1.41221	0	81.1904	0.706104	0.00869689	depleted
KRAS CDE Neutral	LARP1B	CTGATCTTACAACATCTAAG	50.4926	44.294	0.430176	0	47.3933	0.215088	0.00453836		KRAS CDE Neg	LSM1	AATACGGTGATATTCCTCGA	70.7083	10.5786	0.706104	0	40.6434	0.353052	0.00868657	depleted
KRAS CDE Pos	FN1	ACTTGTTATGGAGGAAGCCG	121.581	15.0149	0	0.619709	68.2979	0.309855	0.00453681		KRAS CDE Pos	SYNJ1	TGACTATAGTGCTGAAGTGG	51.4242	128.81	0.706104	0.856194	90.1169	0.781149	0.00866818	depleted
NTC	NTC	ACACGACCGACCGGTGGAAT	63.1157	73.5731	0	0.619709	68.3444	0.309855	0.00453372		KRAS CDE Neg	HSP90B1	TATTCGTCAAACAGACCACG	81.4217	163.034	2.11831	0	122.228	1.05916	0.00866541	depleted
KRAS CDE Neutral	SLC9B1	AAGACCATGTGTTAGGAACA	75.0745	198.948	0	1.23942	137.011	0.619709	0.00452306		KRAS CDE Neutral	RP1L1	AATCAGCAGTATCCTCCGGG	407.109	198.504	3.53052	1.71239	302.806	2.62145	0.00865721	depleted
KRAS CDE Pos	HLA-DQB1	TCGGTGACAGATTTCTATCC	184.696	226.725	0	1.85913	205.711	0.929564	0.00451879		KRAS CDE Neutral	LARP1B	CTTCTTTCTTCGGGGAAAGA	44.9962	136.277	0.706104	0.856194	90.6365	0.781149	0.00861849	depleted
KRAS CDE Neg	SCN5A	GGGTCCAGCCAGGTACCAGG	78.3964	59.309	0	0.619709	68.8527	0.309855	0.00450026		KRAS CDE Neg	WDR93	TCTGTGATGTCATTCCCAAG	89.9924	91.4734	0.706104	0.856194	90.7329	0.781149	0.00860932	depleted
KRAS CDE Neg	CCR2	AACACCAGCGAGTAGAGCGG	111.615	26.2761	0	0.619709	68.9456	0.309855	0.00449419		KRAS CDE Neg	KAT6A	TTTGCAGGAAGACTATCATG	85.7071	377.717	1.41221	2.56858	231.712	1.9904	0.00858996	depleted
KRAS CDE Neg	POFUT1	CAGGCCACTACAGAAGTACA	18.6025	77.3269	0.430176	0	47.9647	0.215088	0.00448429		KRAS CDE Pos	SLC6A4	TACATATGTTACCAGAATGG	137.131	27.3798	1.41221	0	82.2556	0.706104	0.00858427	depleted
KRAS CDE Neg	BLK	AGCACAAGGCCTCAGACACC	206.621	165.915	0.430176	1.23942	186.268	0.834797	0.0044817		KRAS CDE Neg	POFUT1	GCTGGTACTCAATCCAAGGA	117.847	46.6701	1.41221	0	82.2587	0.706104	0.00858395	depleted
NTC	NTC	TCCGTACATCGACCTATTAC	181.375	149.399	0.860351	0.619709	165.387	0.74003	0.00447455		KRAS CDE Pos	PHC2	TGTCCCTGAAGGTACAACGT	66.423	16.179	0.706104	0	41.301	0.353052	0.00854827	depleted
KRAS CDE Neutral	ZNF141	TCGTAGCCAGACCCCCAGGT	97.6633	95.3448	0.860351	0	96.504	0.430176	0.00445759		KRAS CDE Pos	CDHR2	GTAGCCAGTGAAGTTCACTT	154.273	46.6701	0	1.71239	100.471	0.856194	0.00852177	depleted
KRAS CDE Neg	MAP3K2	AAAATGCCGCAGCTGAACGG	116.93	118.618	0.430176	0.619709	117.774	0.524942	0.0044572		KRAS CDE Neutral	SDHC	CGGCCAAAGAAGAGATGGAG	25.7121	57.2487	0.706104	0	41.4804	0.353052	0.0085113	depleted
KRAS CDE Neg	CD200R1	TACTGATGAGAGAATAACCT	253.792	174.924	1.29053	0.619709	214.358	0.955118	0.00445572		KRAS CDE Neg	DIRAS2	GCAGAGTAACGATTACCGGG	21.4268	61.6046	0.706104	0	41.5157	0.353052	0.00850407	depleted
KRAS CDE Neutral	WFDC9	TAAGAGAAACTGAGCAGTGC	189.347	186.185	0.430176	1.23942	187.766	0.834797	0.00444594		KRAS CDE Neutral	SLC35G3	TCAGCTGTGAGAGGACAGGG	377.111	275.665	2.11831	3.42478	326.388	2.77154	0.00849157	depleted
KRAS CDE Pos	ARHGEF1	TCATCTCCGAGGATGTCCAG	227.881	202.701	1.29053	0.619709	215.291	0.955118	0.0044364		KRAS CDE Neg	GRB10	TTGGATTACTCTGGCTGTCA	685.656	318.601	4.23662	4.28097	502.129	4.2588	0.00848148	depleted
KRAS CDE Pos	SLC39A4	TACGTAGAGGAACAGGCCGG	57.1363	82.5821	0	0.619709	69.8592	0.309855	0.00443542		KRAS CDE Neutral	CLEC3A	GCAGGCTTGCCCCAGAGCCA	321.401	368.383	0.706104	5.13717	344.892	2.92164	0.00847116	depleted
KRAS CDE Neutral	TLE4	GCTCCTGGCCTGCATCGCCG	124.903	111.861	0.430176	0.619709	118.382	0.524942	0.00443431		KRAS CDE Neg	NOS1AP	TTCAGCTATATCGCTCGAGA	85.7071	15.5567	0	0.856194	50.6319	0.428097	0.00845509	depleted
KRAS CDE Neg	POP1	AAGAGGTCGCCTAATGTCCC	362.749	306.304	1.7207	1.23942	334.527	1.48006	0.00442434		KRAS CDE Neg	POLR1E	TTGACCTGACAGTGTTACAG	130.703	72.1831	0	1.71239	101.443	0.856194	0.00844014	depleted
KRAS CDE Neutral	ISL2	CTGCTCTGCCGCGCCGACCA	194.662	183.182	0.430176	1.23942	188.922	0.834797	0.00441874		KRAS CDE Neutral	UGT2B4	TTACCAAATGTTGAGTTCGT	21.4268	164.279	0.706104	0.856194	92.8528	0.781149	0.00841277	depleted
NTC	NTC	TGTGCCACGCCGCTGCAACG	40.5269	99.8493	0	0.619709	70.1881	0.309855	0.00441463		KRAS CDE Pos	OR52E8	GCAGTAGGAATGAAGAAGGA	0	84.0062	0.706104	0	42.0031	0.353052	0.00840538	depleted
KRAS CDE Neg	MRPL45	TGGACAGGAAGATGTACCCA	174.731	160.66	0.860351	0.619709	167.695	0.74003	0.00441295		KRAS CDE Neutral	TRPV1	GCTCCACCAAGAGCATGTCG	29.9975	54.1373	0.706104	0	42.0674	0.353052	0.00839253	depleted
KRAS CDE Neg	LTF	GGGCACCCTCGAAAACCCAA	49.1638	91.591	0	0.619709	70.3774	0.309855	0.00440276		KRAS CDE Neutral	TSPAN31	CAAAGAACAGCAGGACTTGG	51.4242	116.986	1.41221	0	84.2053	0.706104	0.0083855	depleted
KRAS CDE Pos	ARHGEF1	GCTCTCATCACTGAGACTGC	195.327	183.933	0.430176	1.23942	189.63	0.834797	0.00440225		KRAS CDE Neg	DDX5	GATTTGGAGGAAGTAGGGCA	85.7071	83.3839	1.41221	0	84.5455	0.706104	0.00835176	depleted
KRAS CDE Neg	DDX5	TATTCGAGTGACCGAGACCG	207.95	74.3239	0	1.23942	141.137	0.619709	0.00439084		KRAS CDE Neutral	SLC27A3	CCATCAACTACACAGGACAG	201.412	154.945	2.11831	0.856194	178.178	1.48725	0.008347	depleted
KRAS CDE Neg	KAT6A	CATCCTGCGAAGACAAACGA	152.806	43.5433	0.860351	0	98.1749	0.430176	0.00438173		KRAS CDE Neutral	EMILIN3	ACACGACGGGATGGCGCCCG	177.842	93.9625	1.41221	0.856194	135.902	1.1342	0.00834571	depleted
KRAS CDE Neutral	KERA	GCACGAGCTGATTCAGGACG	109.622	130.63	0.430176	0.619709	120.126	0.524942	0.00436993		KRAS CDE Neutral	C2orf71	GCAGTGATGGAAGAGAATCC	94.2778	75.2945	1.41221	0	84.7861	0.706104	0.00832806	depleted
KRAS CDE Neg	CLVS1	ATGACAGCAGGATGGCACGA	54.4788	142.642	0.860351	0	98.5603	0.430176	0.00436459		KRAS CDE Neg	IYD	TGGGTCCTTCACAACCACGA	25.7121	77.1613	0	0.856194	51.4367	0.428097	0.0083228	depleted
KRAS CDE Pos	NR1H3	TGTGCTGCAGCCTCTCTACC	134.868	291.29	0	1.85913	213.079	0.929564	0.00436253		KRAS CDE Pos	NPTXR	GGCAGCTGAGAGGTTCACAC	137.131	135.654	1.41221	0.856194	136.393	1.1342	0.00831569	depleted
KRAS CDE Neutral	INHBB	TTGAGCCGCCTGCAGATGCG	136.861	147.897	0	1.23942	142.379	0.619709	0.00435253		NTC	NTC	ATCCGTACCAAACACGCTAC	96.4204	6.84495	0	0.856194	51.6327	0.428097	0.0082912	depleted
KRAS CDE Pos	ROBO3	CCAAGGCTCTTCCCTACAGG	189.347	252.251	1.29053	0.619709	220.799	0.955118	0.00432574		KRAS CDE Neutral	LARP1B	AGTGAGGGTGGTAATATCCG	0	103.297	0	0.856194	51.6483	0.428097	0.0082887	depleted
KRAS CDE Neutral	IPO8	TTATAGAATGAACCACCCCT	378.694	349.848	1.29053	1.85913	364.271	1.57483	0.00432323		KRAS CDE Neg	IDH3A	GAGTATCAAGCTCATCACCG	102.848	85.873	0.706104	0.856194	94.3607	0.781149	0.00827833	depleted
KRAS CDE Pos	SCUBE2	CTGCAAGCCTGGCTACCAAG	57.1363	141.891	0.860351	0	99.5137	0.430176	0.00432278		KRAS CDE Neg	AMFR	AAGCGCTCGAGGAAGAGCAG	66.423	122.587	0.706104	0.856194	94.5049	0.781149	0.0082657	depleted
KRAS CDE Neg	USF2	CCAGAACACCCCGAGATGAG	154.8	187.687	0.860351	0.619709	171.243	0.74003	0.00432152		KRAS CDE Neutral	IAPP	TGAGAAATACTTGCAGCTTC	21.4268	64.0936	0.706104	0	42.7602	0.353052	0.00825656	depleted
KRAS CDE Pos	MRVI1	GGAGAGCCCTCGCAGCAGCG	75.7389	24.0239	0.430176	0	49.8814	0.215088	0.00431199		KRAS CDE Neg	NACA2	GATCTCACGCACCTTCCATA	55.7096	237.706	0.706104	1.71239	146.708	1.20925	0.00824254	depleted
KRAS CDE Pos	CDK7	TAGGATGTATGGTGTAGGTG	89.0264	54.8045	0	0.619709	71.9154	0.309855	0.0043086		KRAS CDE Neg	CEP250	AGGGTCCCTAGAGATCAGCA	158.558	100.185	2.11831	0	129.372	1.05916	0.00818693	depleted
KRAS CDE Pos	NPTXR	TGATGCAGATGACGGCACCG	57.8007	42.0418	0.430176	0	49.9212	0.215088	0.00430854		KRAS CDE Neg	TGM3	CAACATGATCCGGATCACAG	53.5669	51.026	0	0.856194	52.2965	0.428097	0.00818597	depleted
KRAS CDE Pos	CCNG2	TGTCCAAAATATTGACAGCC	215.922	227.476	1.29053	0.619709	221.699	0.955118	0.00430817		KRAS CDE Pos	PEAK1	GCGCCATCACTGGTTCACAG	415.679	212.193	0	5.13717	313.936	2.56858	0.00818186	depleted
KRAS CDE Pos	GIPC1	TCAGCGTGAAGGTACGGCCT	104.971	238.737	0.860351	0.619709	171.854	0.74003	0.00430615		KRAS CDE Neg	SLC12A6	ATGCTACGATTGACCAGCAT	62.1376	24.2685	0.706104	0	43.203	0.353052	0.00817192	depleted
KRAS CDE Neutral	SZRD1	TCAGGACGATAGCCTTCCCG	104.971	139.639	0.430176	0.619709	122.305	0.524942	0.00429207		KRAS CDE Pos	SCUBE2	ACAGTGGGTGAAGCCATACA	40.7109	64.0936	0	0.856194	52.4022	0.428097	0.00816944	depleted
KRAS CDE Pos	FEZ2	AAAAATGGCAGCTCTCAGAA	136.861	208.707	0.860351	0.619709	172.784	0.74003	0.00428297		KRAS CDE Neutral	GPR150	GTGCTGTGCCGCCTGTGCGG	115.705	57.2487	1.41221	0	86.4766	0.706104	0.00816526	depleted
KRAS CDE Neg	EIF3H	GGGAAAGGCAAAGGCAAAGG	76.4032	168.918	0.430176	0.619709	122.661	0.524942	0.00427963		KRAS CDE Pos	SLC28A1	CGCCGAAGCCCTTCTCCAGA	57.8523	115.12	1.41221	0	86.4859	0.706104	0.00816438	depleted
KRAS CDE Neg	LIG4	TCTGCAATAGCAGCTAGCAT	127.56	17.2672	0	0.619709	72.4137	0.309855	0.00427895		KRAS CDE Neutral	ANP32A	AGAGCGCGAGAGATGGAGAT	36.4255	68.4495	0	0.856194	52.4375	0.428097	0.00816395	depleted
KRAS CDE Neutral	ELF2	AAGATAAAAATACTTGTCCC	239.175	308.557	1.7207	0.619709	273.866	1.17021	0.00427291		KRAS CDE Neg	TLN2	GGACTTTGAGGAACAGATCT	104.991	0	0	0.856194	52.4956	0.428097	0.00815492	depleted
NTC	NTC	CCGTTTCGCCTATTGGTGCG	95.6701	150.149	0.430176	0.619709	122.91	0.524942	0.00427096		KRAS CDE Pos	ANKRD45	AGAAGAAGCCCAAGAACCAG	149.987	270.064	0	3.42478	210.026	1.71239	0.00815323	depleted
KRAS CDE Neutral	ACTRT3	TGTGGCAATGAACTACGAAG	87.0332	159.158	0.430176	0.619709	123.096	0.524942	0.00426451		KRAS CDE Neutral	APEH	GAGGTCACCACGCAGTACGG	36.4255	155.567	0.706104	0.856194	95.9963	0.781149	0.00813729	depleted
NTC	NTC	TAGATGGTGCTTCTGTCGCG	67.102	33.7836	0.430176	0	50.4428	0.215088	0.004264		KRAS CDE Neutral	SAR1B	GCAGGATTATATAAGAAAAC	51.4242	35.4693	0.706104	0	43.4468	0.353052	0.00812608	depleted
KRAS CDE Pos	RFX4	AATCTCTGCACTGTCAGGAG	172.738	73.5731	0.430176	0.619709	123.155	0.524942	0.00426244		KRAS CDE Neutral	VPS26A	AAGCCATATGAATCTTACAT	179.985	118.231	0.706104	1.71239	149.108	1.20925	0.00810988	depleted
KRAS CDE Neg	BMPR1A	TATGACAACAGGGGGCAGTG	94.3414	51.0507	0	0.619709	72.6961	0.309855	0.00426233		KRAS CDE Neg	MAP3K2	AAAATGCCGCAGCTGAACGG	38.5682	48.5369	0.706104	0	43.5526	0.353052	0.00810634	depleted
KRAS CDE Neg	PTPN1	GTGTGGGAGCAGAAAAGCAG	31.2257	69.8194	0.430176	0	50.5225	0.215088	0.00425726		KRAS CDE Neg	CELSR3	TGTCATTCTGGTCAACCAGG	53.5669	120.72	1.41221	0	87.1435	0.706104	0.00810278	depleted
KRAS CDE Pos	COX8A	TGTAGGTCTCCAGGTGTGAC	71.0882	75.0746	0	0.619709	73.0814	0.309855	0.00423985		KRAS CDE Neg	OR5T2	AGTTAGGTGAGCTCCACATG	98.5631	75.9167	1.41221	0	87.2399	0.706104	0.00809382	depleted
KRAS CDE Neutral	CA8	CAGGTGACACCTTCACTGCA	152.806	140.39	0	1.23942	146.598	0.619709	0.00422727		KRAS CDE Neutral	ESF1	CTTCAATTACAACAAGATTG	21.4268	153.078	1.41221	0	87.2524	0.706104	0.00809266	depleted
KRAS CDE Neutral	ALOX15B	GGTTCCAGCTGACACCGCCG	37.8694	108.858	0	0.619709	73.3638	0.309855	0.00422353		KRAS CDE Neutral	ODF2L	CTGGAAGCTGCTTTAGAAGA	156.415	36.7138	0.706104	0.856194	96.5646	0.781149	0.00808939	depleted
KRAS CDE Neg	RCBTB2	AGATTAGTAGAGATATGACA	177.388	117.116	0	1.23942	147.252	0.619709	0.00420848		KRAS CDE Pos	COX8A	ACAGGATCCAGCCCGCTGGC	29.9975	75.9167	0	0.856194	52.9571	0.428097	0.00808385	depleted
KRAS CDE Neg	POLR3F	ACTAGTATATCAAATCATAG	33.2188	114.113	0	0.619709	73.6661	0.309855	0.0042062		KRAS CDE Neutral	GHR	TTCTGAATATCTGCATTGCG	21.4268	65.9604	0.706104	0	43.6936	0.353052	0.00808018	depleted
KRAS CDE Neg	DDX5	GATTTGGAGGAAGTAGGGCA	239.84	304.803	0.430176	1.85913	272.321	1.14465	0.00420331		KRAS CDE Neutral	GPR139	GGTAATGGTGAACAAGATGG	34.2828	159.301	0.706104	0.856194	96.7917	0.781149	0.00807041	depleted
KRAS CDE Neg	CSGALNACT2	ATTAAGGTAAAACTTTCAAA	95.6701	51.8015	0	0.619709	73.7358	0.309855	0.00420223		KRAS CDE Pos	C5orf46	GGAATAAGACAAGCAGTCCC	44.9962	130.054	1.41221	0	87.5251	0.706104	0.00806744	depleted
KRAS CDE Neg	PRH2	TACTGAGGAGACTGCCCCTG	108.293	244.743	0.860351	0.619709	176.518	0.74003	0.00419237		NTC	NTC	CGCTTCATTGCCCGAACGCT	42.8535	44.8033	0.706104	0	43.8284	0.353052	0.00805532	depleted
KRAS CDE Pos	LMO4	GCTGTGCCAATAGCTGTCCA	87.0332	118.618	0.860351	0	102.826	0.430176	0.00418355		KRAS CDE Neutral	KCNAB3	TCCTCCAGTGTGTGAACAAG	85.7071	21.1571	0	0.856194	53.4321	0.428097	0.00801199	depleted
KRAS CDE Neutral	LEO1	ATTAAAAACCGATATAAAGG	45.8419	159.909	0.860351	0	102.875	0.430176	0.00418152		KRAS CDE Neg	LTA4H	GAAATATCTCATAGCTGGAC	501.386	487.858	7.06104	0.856194	494.622	3.95862	0.00800331	depleted
KRAS CDE Neutral	PCDH18	CAGGATTTATGAGGAACAGA	146.827	105.104	0.430176	0.619709	125.966	0.524942	0.00416734		KRAS CDE Neg	SCN10A	CACTTAGGCAGAAGATGGTG	10.7134	96.4516	0	0.856194	53.5825	0.428097	0.0079895	depleted
KRAS CDE Neutral	MTFR2	GTTTCTTTCTGTCTTACAGC	49.8282	157.657	0.860351	0	103.742	0.430176	0.00414657		KRAS CDE Pos	PLXNB2	GTCCTCGTAGAACAGGCGGA	239.98	242.062	2.11831	1.71239	241.021	1.91535	0.00794682	depleted
NTC	NTC	GATCTTACCACTCGTCGTAG	156.793	96.8463	0.430176	0.619709	126.819	0.524942	0.00413929		KRAS CDE Neg	NANOG	TATCATTGAGTACACACAGC	0	88.9844	0.706104	0	44.4922	0.353052	0.00793515	depleted
KRAS CDE Neutral	LARP1B	GAAGCGAGATAGAGAAAAAA	89.0264	60.8104	0	0.619709	74.9184	0.309855	0.00413589		KRAS CDE Pos	MTF2	AGTGCTGCAAATGTAAGCAG	89.9924	18.0458	0	0.856194	54.0191	0.428097	0.00792492	depleted
KRAS CDE Neutral	NEK2	GACCACCATCACTTCGTCTG	137.526	70.5701	0.860351	0	104.048	0.430176	0.0041344		KRAS CDE Neutral	CORT	ACCAAGCGAGGAAAGTCAGG	53.5669	143.744	0.706104	0.856194	98.6554	0.781149	0.00791795	depleted
KRAS CDE Neg	C3orf56	AGGAGTAGATGACAGGCCAG	219.908	334.082	0.430176	1.85913	276.995	1.14465	0.00413239		KRAS CDE Neg	NDRG4	ACTACATGCAGAAGGCCGTA	2.14268	87.1176	0.706104	0	44.6301	0.353052	0.00791062	depleted
KRAS CDE Neg	EXOSC8	GAAACAGCAGAAGAAACAAG	133.54	120.87	0.430176	0.619709	127.205	0.524942	0.00412675		KRAS CDE Neutral	CABP1	GGATGGCTACATCAACTGCC	96.4204	120.098	0	1.71239	108.259	0.856194	0.00790875	depleted
KRAS CDE Neutral	KLB	TATAGTTACTTTATACCACT	249.805	201.2	0	1.85913	225.503	0.929564	0.00412219		KRAS CDE Pos	CCDC7	AGACAACATGACTTTCACGG	66.423	23.0239	0.706104	0	44.7234	0.353052	0.00789411	depleted
KRAS CDE Neg	XYLT1	AGCTCCTTCTGTCTACTCGG	112.28	142.642	0.430176	0.619709	127.461	0.524942	0.00411847		KRAS CDE Neutral	ITGBL1	AGAGACTGCGACAAACATGA	34.2828	55.3819	0.706104	0	44.8323	0.353052	0.00787494	depleted
KRAS CDE Pos	SLC39A9	TATAGGCATGCAGCTGTGTG	130.882	78.0776	0.860351	0	104.48	0.430176	0.00411731		KRAS CDE Neg	POLR3F	GCTGCAAAAGAAGGCACAGT	29.9975	79.0281	0	0.856194	54.5128	0.428097	0.00785315	depleted
KRAS CDE Neutral	CDH12	TAGAACAGCTTTGCCAAACA	115.601	35.2851	0	0.619709	75.4432	0.309855	0.00410712		KRAS CDE Neutral	FILIP1L	TAGTGGCAGAAAAATCCCGT	40.7109	68.4495	0	0.856194	54.5802	0.428097	0.00784346	depleted
KRAS CDE Pos	GRB2	AATTGAACTTCACCACCCAG	366.735	341.59	0.430176	2.47884	354.163	1.45451	0.00410689		KRAS CDE Neg	UPK1A	ACTGATGGGAGTCTCAGGCA	89.9924	19.2903	0	0.856194	54.6414	0.428097	0.00783467	depleted
KRAS CDE Neg	BICD1	GAGAGCAAAAGAACAACCTG	85.7045	65.3149	0	0.619709	75.5097	0.309855	0.00410351		KRAS CDE Neg	ALOXE3	CCAATGCTCCATCATCCATG	327.83	399.496	1.41221	4.28097	363.663	2.84659	0.00782755	depleted
KRAS CDE Neg	AP4E1	TTTCTGAGACTACTAGCGGA	95.6701	55.5552	0	0.619709	75.6127	0.309855	0.00409792		KRAS CDE Pos	PBXIP1	TTAGTCCCTTCCCTCCACCG	115.705	84.0062	0.706104	0.856194	99.8554	0.781149	0.00782281	depleted
KRAS CDE Neg	TAF13	AGTAAGCAAGTCTTTAACCC	60.4582	90.8403	0	0.619709	75.6493	0.309855	0.00409594		KRAS CDE Neutral	KLB	TTCTCAGCAATCAAGATTCG	55.7096	125.076	1.41221	0	90.3928	0.706104	0.00781151	depleted
NTC	NTC	AATAAGCCTACCCGGCGAGA	40.5269	64.5642	0.430176	0	52.5456	0.215088	0.00409336		KRAS CDE Neutral	ST3GAL6	TTCTGGATAAAAAAGTCGGA	184.27	106.408	1.41221	0.856194	145.339	1.1342	0.00780383	depleted
KRAS CDE Pos	PTGIR	GCTGCCATCTTCCTCTGCAA	267.743	350.598	1.29053	1.23942	309.171	1.26497	0.0040915		KRAS CDE Neg	LZTFL1	TCTGATACCTGCTCTCCTTG	38.5682	271.931	0.706104	1.71239	155.25	1.20925	0.00778904	depleted
KRAS CDE Pos	GFI1	CCTGTCAGTACTGTGGCAAG	102.978	107.357	0.860351	0	105.167	0.430176	0.00409039		KRAS CDE Pos	SPEN	CGCAAGGCATGAGTTCCAGG	113.562	106.408	0	1.71239	109.985	0.856194	0.00778466	depleted
KRAS CDE Neg	PIEZO1	ATGAAGCGGGAGCTCTACAA	164.765	45.7955	0.860351	0	105.28	0.430176	0.004086		KRAS CDE Neutral	CASP6	CTGAAGATCCTGCAATGCCA	79.279	231.484	0.706104	1.71239	155.381	1.20925	0.00778244	depleted
KRAS CDE Neg	CFLAR	TTTCCCGTAAAATATCCAGA	36.5407	69.0687	0.430176	0	52.8047	0.215088	0.00407327		KRAS CDE Neg	IL11RA	GCAGCCCCTAGGGGATCCTG	44.9962	65.9604	0	0.856194	55.4783	0.428097	0.00771648	depleted
KRAS CDE Pos	PLXNB2	GCTGCAGCTTCGCATCCAGC	47.8351	57.8075	0.430176	0	52.8213	0.215088	0.00407199		KRAS CDE Pos	MTF2	TTTCTTGTATATGGGCCAGG	44.9962	65.9604	0	0.856194	55.4783	0.428097	0.00771648	depleted
KRAS CDE Neutral	DCAKD	GATCACTGAGCTCTTGCCTG	64.4445	41.291	0.430176	0	52.8678	0.215088	0.00406841		KRAS CDE Pos	PXDNL	AGGATGCTGAGGGGTTACCG	169.271	144.366	0.706104	1.71239	156.819	1.20925	0.0077111	depleted
KRAS CDE Pos	HIST3H2A	CACCGCGGCCAGATAGACCG	249.805	161.41	0.430176	1.23942	205.608	0.834797	0.00406014		KRAS CDE Neutral	OR3A3	GCATGAGTCAGACAGTCCAG	252.836	152.456	1.41221	1.71239	202.646	1.5623	0.0077095	depleted
KRAS CDE Neg	SLC12A6	GCACTTTGATGATGGAACAA	152.142	212.461	0.860351	0.619709	182.302	0.74003	0.00405937		KRAS CDE Neg	KRTAP4-2	GCTGACTTCAAATCTGGCCC	49.2816	42.3142	0.706104	0	45.7979	0.353052	0.00770891	depleted
KRAS CDE Neutral	ARID3C	CTGGGTGCGTAGAGTGAAGG	70.4238	82.5821	0	0.619709	76.503	0.309855	0.00405023		KRAS CDE Neg	TESK1	TGGACATTGCCCGAGGCCTG	55.7096	258.241	0.706104	1.71239	156.975	1.20925	0.00770341	depleted
KRAS CDE Pos	MEOX2	TATCTCGTATCGCCTCAGTC	152.142	153.903	0	1.23942	153.023	0.619709	0.00404979		KRAS CDE Neutral	TLE4	TAGTTGGTATTTGTCTGGCT	68.5656	134.41	0.706104	0.856194	101.488	0.781149	0.00769698	depleted
KRAS CDE Pos	C10orf53	GGCGATGCCCAAGAACGCAG	67.7663	85.5851	0	0.619709	76.6757	0.309855	0.00404111		KRAS CDE Pos	TGOLN2	AGAAGACACCCCCAACAAGT	111.419	72.1831	1.41221	0	91.8011	0.706104	0.00769167	depleted
KRAS CDE Neg	C2orf16	ATCAAAGTATGAAATCTCCA	66.4376	194.443	0.430176	0.619709	130.44	0.524942	0.00402438		KRAS CDE Neutral	SLC22A8	CACAGCCAATACTGTCCTCA	96.4204	14.9344	0	0.856194	55.6774	0.428097	0.00768888	depleted
KRAS CDE Neutral	RPSA	ATATAACACTGACATCAGCA	73.7457	80.3298	0	0.619709	77.0378	0.309855	0.00402211		KRAS CDE Pos	ALDH8A1	CTTAGCACTGGCAAGAACCA	98.5631	85.2507	1.41221	0	91.9069	0.706104	0.00768282	depleted
KRAS CDE Neutral	LARP1B	AGTGAGGGTGGTAATATCCG	43.1844	63.8134	0.430176	0	53.4989	0.215088	0.00402041		KRAS CDE Neg	MGAT2	TATCAGTGAAAAGTTTACTG	68.5656	42.9365	0	0.856194	55.7511	0.428097	0.00767873	depleted
KRAS CDE Neg	RPE	CGAGGCTACTGAGAACCCAG	166.094	249.248	0.430176	1.23942	207.671	0.834797	0.00401981		KRAS CDE Neutral	PARP8	ATACACATAAATACCTTCTG	269.977	393.274	4.23662	0.856194	331.625	2.54641	0.00767857	depleted
KRAS CDE Neutral	COMMD7	GCAGTTCTCAGCCCTGACAG	295.647	132.882	1.7207	0	214.265	0.860351	0.00401537		KRAS CDE Neutral	U2SURP	CTACTTGCTCCTGAAAACTC	38.5682	184.814	0	1.71239	111.691	0.856194	0.00766575	depleted
KRAS CDE Neutral	NKX2-5	CATGCAGGAGGAGGGCGCCA	83.047	71.3209	0	0.619709	77.1839	0.309855	0.0040145		KRAS CDE Neg	ACTL7A	CCACAAGATCTCAACAACGG	81.4217	123.831	0.706104	0.856194	102.627	0.781149	0.00761157	depleted
KRAS CDE Neg	CFLAR	TTGTCTTCAGGTCTATTCTG	47.8351	106.606	0	0.619709	77.2205	0.309855	0.00401259		KRAS CDE Pos	FOXG1	GCCGCGCCACTACGACGACC	203.554	187.303	2.11831	0.856194	195.429	1.48725	0.00761022	depleted
KRAS CDE Neg	MMAA	GCAAAGGGCCTGTTTAGCAG	76.4032	138.137	0.860351	0	107.27	0.430176	0.0040102		KRAS CDE Pos	SLC39A9	TTGGGTGCTGGCCTTCTCTG	38.5682	54.7596	0.706104	0	46.6639	0.353052	0.00756585	depleted
KRAS CDE Neutral	C3orf38	GGACATCCACCTATTTCAAC	51.1569	57.0567	0.430176	0	54.1068	0.215088	0.00397524		KRAS CDE Neg	BCAR1	GATGAGCTCTCCTTCCGCAA	68.5656	138.144	0.706104	0.856194	103.355	0.781149	0.00755795	depleted
KRAS CDE Pos	HLA-DQB1	ACACCGTGTCCAACTCCGCC	249.141	173.422	0.430176	1.23942	211.282	0.834797	0.00395111		KRAS CDE Neg	CLVS1	AGCCAGGAAGTTTCACCAAG	182.128	305.534	2.82442	0.856194	243.831	1.84031	0.00754747	depleted
KRAS CDE Neg	TUT7	GGTCCAGACCTAGGAAGCCA	144.17	121.621	0.430176	0.619709	132.895	0.524942	0.00395005		KRAS CDE Neutral	RTN4RL2	TGCCTGCCGAAGACTCGCGG	72.851	154.323	0	1.71239	113.587	0.856194	0.0075378	depleted
KRAS CDE Neutral	SH3BP5L	CCTGCCACGTGGGGTCCAGT	425.865	157.657	0.430176	1.85913	291.761	1.14465	0.00392325		KRAS CDE Neg	ZMYND15	GCTGTGACAGAGGAGAGCAT	233.552	67.8272	1.41221	0.856194	150.689	1.1342	0.00752674	depleted
KRAS CDE Neutral	TRIM37	TCTATCACTTCGAAGAGCAG	72.417	85.5851	0	0.619709	79.001	0.309855	0.00392216		KRAS CDE Pos	FZD9	GGAGGCGCCCGAGAACGCCA	89.9924	137.521	0	1.71239	113.757	0.856194	0.00752653	depleted
KRAS CDE Neg	TESK1	CCATGACTTGCCCTGACTGT	298.969	285.284	0.430176	1.85913	292.126	1.14465	0.00391834		KRAS CDE Neutral	GLUCM	TCTGGGGTGAGACAACCAGG	92.1351	115.742	0.706104	0.856194	103.938	0.781149	0.00751549	depleted
KRAS CDE Neutral	CASP6	GCAAATCGCTAATTCCAGCA	108.293	50.3	0	0.619709	79.2966	0.309855	0.00390754		KRAS CDE Neg	PREX1	AGTAACTTACTTGATCACCG	0	93.9625	0.706104	0	46.9813	0.353052	0.00751474	depleted
KRAS CDE Neutral	U2SURP	CTACTTGCTCCTGAAAACTC	248.477	179.428	0.430176	1.23942	213.952	0.834797	0.00390179		KRAS CDE Pos	SYNJ1	GGCGGGGGCAAAGAAGACTG	29.9975	84.0062	0	0.856194	57.0018	0.428097	0.00751023	depleted
KRAS CDE Pos	KIF17	AAAACCTCTGCAGCAGACAA	182.703	245.494	0.430176	1.23942	214.099	0.834797	0.00389912		KRAS CDE Neutral	WFDC12	TGGTCTGTGTGACACTGGGG	44.9962	49.1592	0.706104	0	47.0777	0.353052	0.00749935	depleted
KRAS CDE Neg	REV3L	CTGGATAAGTGGTACTCCGG	198.648	119.369	0	1.23942	159.009	0.619709	0.00389733		KRAS CDE Neg	PTPN1	TGACCGCATGTGTTAGGCAA	81.4217	32.9802	0	0.856194	57.201	0.428097	0.00748409	depleted
KRAS CDE Neutral	TSPAN31	TCCAGCATCCACATCATCGG	316.243	222.972	0.860351	1.23942	269.607	1.04988	0.00389413		KRAS CDE Pos	SYNJ1	TCTTCCTTCATACAAATCCG	164.986	138.144	1.41221	0.856194	151.565	1.1342	0.00748327	depleted
KRAS CDE Neutral	ITGBL1	ACTGCTACTGCAAGGCTGGT	51.1569	108.107	0	0.619709	79.6322	0.309855	0.00389107		KRAS CDE Neutral	NDUFAF5	CCTGCTCAAGTGCTCTAGGA	44.9962	69.694	0	0.856194	57.3451	0.428097	0.00746528	depleted
NTC	NTC	GGTCTGTCCGTTGCGACCAC	150.149	230.479	0.860351	0.619709	190.314	0.74003	0.00388847		KRAS CDE Neutral	ANP32A	GGTGAAGAGGAGGACGTGAG	152.13	151.833	1.41221	0.856194	151.982	1.1342	0.00746275	depleted
KRAS CDE Neg	OR5C1	GGTGAGGGTTGTGTGAACAA	175.395	254.503	0.430176	1.23942	214.949	0.834797	0.0038837		KRAS CDE Neutral	DNAJC6	GTAGGTCACACATATAGCCC	137.131	93.3402	0	1.71239	115.236	0.856194	0.00742994	depleted
KRAS CDE Neutral	GPR150	TGGCAGGTATACTGATTGGA	217.251	372.37	0.430176	1.85913	294.811	1.14465	0.00388267		KRAS CDE Pos	CLDN23	CGAGCGCGAGTGCGGCCAGA	49.2816	65.9604	0	0.856194	57.621	0.428097	0.00742954	depleted
KRAS CDE Neutral	GNPDA2	ATAATGCACATATCCTTGAC	162.108	60.0597	0.860351	0	111.084	0.430176	0.00387254		KRAS CDE Pos	AGFG1	ACCAACAGGAGCTTTACCTG	227.124	78.4058	1.41221	0.856194	152.765	1.1342	0.0074245	depleted
KRAS CDE Neg	SCN10A	GATTACATCTTCAAACAAAA	239.175	303.301	0.860351	1.23942	271.238	1.04988	0.00387071		KRAS CDE Neg	FURIN	TCATTCATCTGTGTGTACCG	267.835	404.474	0.706104	4.28097	336.154	2.49354	0.00741783	depleted
KRAS CDE Neg	CD2BP2	GTTCAGGAAGTAGTTGCCAT	21.26	138.888	0	0.619709	80.074	0.309855	0.0038696		KRAS CDE Neutral	NFKBIB	GCCCCGCCCCCGGCGCCCCA	62.1376	33.6025	0.706104	0	47.8701	0.353052	0.00737522	depleted
KRAS CDE Neg	ARNTL2	ATACTCATACTGTAAACTGC	186.025	197.446	0.860351	0.619709	191.736	0.74003	0.00385964		KRAS CDE Neg	SPINT1	CAGTGCCTCGAGTCTTGTCG	42.8535	52.8928	0.706104	0	47.8732	0.353052	0.00737474	depleted
KRAS CDE Neutral	KLB	AAACCGGTCGGAAAACACGA	160.115	161.41	0	1.23942	160.763	0.619709	0.00385481		KRAS CDE Neutral	TAS2R19	TCTTAATTCTCTTCTTTAGG	323.544	237.706	0.706104	3.42478	280.625	2.06544	0.00736014	depleted
KRAS CDE Neg	PSMB10	CCATCCTCGAGCAGGTACCA	71.0882	90.0895	0	0.619709	80.5889	0.309855	0.00384488		NTC	NTC	ACTCGACCTAACGTCGATGT	162.843	50.4037	0.706104	0.856194	106.624	0.781149	0.00732623	depleted
KRAS CDE Pos	OTULL	TAGCCTCCGGAAGTAGCAGA	130.218	93.8433	0.860351	0	112.03	0.430176	0.00383981		KRAS CDE Neutral	OTUD4	ACAGGAATGGGTAGGACAAG	132.846	432.476	0.706104	3.42478	282.661	2.06544	0.00730713	depleted
KRAS CDE Neg	MGAT2	GACTCTTACCCGAATCACAG	247.812	138.888	0.860351	0.619709	193.35	0.74003	0.00382741		KRAS CDE Neutral	EFTUD2	ATCAGGGCCAAAAGCCCAGA	83.5644	110.141	1.41221	0	96.8529	0.706104	0.00729048	depleted
KRAS CDE Neutral	CABP1	GGATAGATCACTGCGACCAG	41.1913	120.87	0	0.619709	81.0307	0.309855	0.00382392		KRAS CDE Neutral	DHODH	CAGAGCGCAGGGCACCCTGG	38.5682	58.4932	0.706104	0	48.5307	0.353052	0.00727482	depleted
KRAS CDE Neutral	AHCY	GTATGCCTGGAAGGGCGAAA	235.853	201.2	0.430176	1.23942	218.527	0.834797	0.00382011		KRAS CDE Neg	DIRAS2	CCTCGCTGCTCTGCACCTCG	0	97.0738	0.706104	0	48.5369	0.353052	0.00727388	depleted
KRAS CDE Neg	NARS	CTACATGCAGCGATGTCCTG	85.7045	76.5761	0	0.619709	81.1403	0.309855	0.00381875		KRAS CDE Neutral	RFWD3	TGATGTGGTCAGCAGCCAGG	21.4268	75.9167	0.706104	0	48.6717	0.353052	0.00725374	depleted
KRAS CDE Pos	CELA3B	GGAAGCTTCTACCACACCTG	191.34	133.633	0	1.23942	162.487	0.619709	0.00381391		KRAS CDE Neg	POFUT1	GGGAGGCCTTACCCATGCAG	2.14268	95.207	0.706104	0	48.6749	0.353052	0.00725327	depleted
KRAS CDE Pos	TMEM246	CAGGCCAGCTAAACCCTGGG	63.7801	99.0985	0	0.619709	81.4393	0.309855	0.00380473		KRAS CDE Neg	SEMA5B	CTGTCTCGGGCTGCACACGG	47.1389	70.9386	0	0.856194	59.0387	0.428097	0.00725112	depleted
KRAS CDE Neg	NOS1AP	ACACTTGCTGAAGGACCAGT	326.209	339.337	1.29053	1.23942	332.773	1.26497	0.00380131		KRAS CDE Neutral	IAPP	CAGGCGCTGCGTTGCACATG	0	118.853	0	0.856194	59.4266	0.428097	0.0072038	depleted
KRAS CDE Pos	RXFP3	TGTGACGCGCTACCATTCGG	76.4032	150.149	0.860351	0	113.276	0.430176	0.00379758		KRAS CDE Pos	EREG	TTAAAAAGAAGTGTTCACAT	104.991	134.41	0	1.71239	119.701	0.856194	0.0071528	depleted
KRAS CDE Pos	CNRIP1	TTGGGACCTTCGAGACAGTG	106.965	56.306	0	0.619709	81.6352	0.309855	0.0037956		KRAS CDE Neg	CINP	CAGCAGCAGCCCAGCCTCGA	59.9949	59.7378	0	0.856194	59.8663	0.428097	0.00715088	depleted
KRAS CDE Pos	CELA3B	GGAAGGATGTCACCAGCCGG	59.1295	104.354	0	0.619709	81.7416	0.309855	0.00379066		KRAS CDE Neg	TTBK1	TGGGCCGCCACGACGACCTG	164.986	152.456	1.41221	0.856194	158.721	1.1342	0.00714588	depleted
KRAS CDE Pos	ATF6	GTGTTAATTAGGGGCTGACA	167.423	109.609	0.430176	0.619709	138.516	0.524942	0.00378976		KRAS CDE Neutral	SH3BP5L	CCGACTGGACCCCACGTGGC	96.4204	101.43	1.41221	0	98.9251	0.706104	0.00713776	depleted
KRAS CDE Neg	HSD17B4	TGACAAAGCCAAAGGACAAG	93.0126	70.5701	0	0.619709	81.7914	0.309855	0.00378835		KRAS CDE Neutral	GPR150	GCAGGTCTACGCGTTCTACG	542.097	674.539	3.53052	5.13717	608.318	4.33384	0.00712431	depleted
KRAS CDE Neutral	EFTUD2	AGGTGATGCTGAACACAGAG	168.751	108.858	0.430176	0.619709	138.805	0.524942	0.00378187		KRAS CDE Neutral	HAL	GGAGAGGGAGTCAACAGACG	115.705	103.919	0.706104	0.856194	109.812	0.781149	0.00711354	depleted
KRAS CDE Neg	DCTN6	ATGGTGCAGACTGCCTTCGT	77.732	86.3358	0	0.619709	82.0339	0.309855	0.00377715		KRAS CDE Neutral	MTFR2	TCTGTAGACTCTGATAATTG	57.8523	182.947	0	1.71239	120.4	0.856194	0.00711128	depleted
KRAS CDE Neg	EXOC5	GTATGGAGAACCCCAGGAGG	52.4857	111.861	0	0.619709	82.1734	0.309855	0.00377074		KRAS CDE Pos	PLXNB2	TCTGCTGTCTGCAGACCACG	51.4242	69.0718	0	0.856194	60.248	0.428097	0.00710558	depleted
NTC	NTC	GTATCCTCGCAATCGTTAGG	377.366	445.193	0	3.09855	411.279	1.54927	0.00376696		KRAS CDE Neutral	NAAA	TGATGTTTCAGCAAGTTCAT	359.97	609.823	0	6.84956	484.896	3.42478	0.00706291	depleted
KRAS CDE Neutral	GNPNAT1	TGTACTGCTGACTTAAATAG	123.574	155.404	0.430176	0.619709	139.489	0.524942	0.00376332		KRAS CDE Neutral	UBTD2	CATTCATATCCAGAATTGGG	38.5682	82.7617	0	0.856194	60.6649	0.428097	0.00705675	depleted
KRAS CDE Pos	EBF3	TTCATGGTCGTCCCCCCGCG	366.735	292.791	0	2.47884	329.763	1.23942	0.00375851		KRAS CDE Neutral	SPATA13	CTTCAGGAATAGACAAACTG	154.273	67.205	0.706104	0.856194	110.739	0.781149	0.00705398	depleted
KRAS CDE Neutral	PTGIS	GGACCCACACTCCTACGACG	251.798	243.993	0	1.85913	247.895	0.929564	0.00374982		KRAS CDE Neg	FAR2	CGTGCGCCAGTTGAACTGGT	21.4268	79.0281	0.706104	0	50.2274	0.353052	0.00702907	depleted
KRAS CDE Neg	FURIN	TGACTTGCGGCAGAAGTGCA	222.566	273.272	0	1.85913	247.919	0.929564	0.00374947		KRAS CDE Pos	CRYAA	TGGGGCCCTTCTACCCCAGC	57.8523	64.0936	0	0.856194	60.9729	0.428097	0.0070211	depleted
KRAS CDE Neg	RAF1	ACAGTAAAGTCACGCTGGAG	343.482	446.694	1.7207	1.23942	395.088	1.48006	0.00374615		KRAS CDE Neutral	IMPACT	CTGTGCCAGAAACATACTAG	137.131	208.46	0.706104	1.71239	172.796	1.20925	0.00699813	depleted
KRAS CDE Neg	RIN2	TTTCAGTTCTCCGATCTCCG	34.5475	131.381	0	0.619709	82.9641	0.309855	0.0037348		KRAS CDE Neg	ARNTL2	GAGTTTCCACGAAAACGCAA	169.271	32.9802	1.41221	0	101.126	0.706104	0.00698243	depleted
KRAS CDE Neg	GRB10	GGCCGAGTACAGGCTCTCCA	69.0951	96.8463	0	0.619709	82.9707	0.309855	0.00373451		NTC	NTC	TCAATAGTTCTGCGCGAATT	164.986	181.702	0.706104	1.71239	173.344	1.20925	0.00697598	depleted
KRAS CDE Neutral	PCDH9	TGGTCATAGAATTCGTCCTG	235.189	212.461	0.430176	1.23942	223.825	0.834797	0.00372968		KRAS CDE Neutral	NEK2	TGCCACAGACGAAGTGATGG	10.7134	90.8512	0.706104	0	50.7823	0.353052	0.00695227	depleted
KRAS CDE Neg	HSF2	ATAGTGAGAATGAGTCCCTT	156.793	175.675	0	1.23942	166.234	0.619709	0.00372794		KRAS CDE Pos	PTPN5	ATGCACCGAGTATTGGCCGG	122.133	225.883	0.706104	1.71239	174.008	1.20925	0.00694937	depleted
KRAS CDE Neg	CYP8B1	CATGGTCCCCTTGCACTGAA	288.339	108.858	0.860351	0.619709	198.599	0.74003	0.00372626		KRAS CDE Pos	ZNF799	CCACTCATACGGCTTTCATA	272.12	76.539	0.706104	1.71239	174.329	1.20925	0.00693656	depleted
KRAS CDE Pos	PPTC7	CCAGGTTTGCTGTGTGTAAG	63.1157	103.603	0	0.619709	83.3593	0.309855	0.0037171		KRAS CDE Neg	POLR1E	GCTGCATCATCATAGCAGGG	147.845	179.213	1.41221	0.856194	163.529	1.1342	0.00693578	depleted
KRAS CDE Neg	CPEB1	CAGAGGCAGGAAGCTCAAGG	27.9038	87.8373	0.430176	0	57.8705	0.215088	0.00371671		KRAS CDE Pos	CELA3B	ACTCCCAGACAAGCTGCAGG	115.705	131.299	0	1.71239	123.502	0.856194	0.00693266	depleted
KRAS CDE Neg	TLN2	GGACACAGTTCTCCACCGAG	221.902	125.375	1.29053	0	173.638	0.645263	0.00371614		KRAS CDE Pos	GRPEL2	GAGGCGAACCCAGAGATGTG	130.703	116.364	0	1.71239	123.534	0.856194	0.00693086	depleted
KRAS CDE Neg	RTN4RL1	CATCCCGGAGGGCATCCCCG	142.176	140.39	0.430176	0.619709	141.283	0.524942	0.00371554		KRAS CDE Neg	TP53I3	ATCCCTCTGGGATAGGCATG	222.838	250.152	0.706104	2.56858	236.495	1.63734	0.00692337	depleted
KRAS CDE Neg	NR1H2	AGGTGATACACTCTGTCTCG	152.806	181.681	0	1.23942	167.244	0.619709	0.00370543		KRAS CDE Neg	POLR3F	TGGAGCCTGGTACAGTGACC	59.9949	42.3142	0.706104	0	51.1546	0.353052	0.00690167	depleted
KRAS CDE Neutral	KIF3B	TTACTTAGAGATCTACCAGG	143.505	24.0239	0	0.619709	83.7645	0.309855	0.00369911		KRAS CDE Pos	PLXNB2	GCGAGGCGTCCACCACCTCG	53.5669	49.1592	0.706104	0	51.3631	0.353052	0.00687366	depleted
KRAS CDE Pos	MRVI1	GCAGTGCTGAAGTGACAGGT	86.3689	30.0298	0.430176	0	58.1994	0.215088	0.00369571		KRAS CDE Neutral	AXIN2	GGGAAGAAATTCCATACCGG	10.7134	92.0957	0.706104	0	51.4045	0.353052	0.00686811	depleted
KRAS CDE Neg	CACNB3	TGCTCAACAATCCGGGCAAG	56.472	60.0597	0.430176	0	58.2658	0.215088	0.00369149		KRAS CDE Pos	CNR2	GCTGTCTTCCTGCTGAAGAT	59.9949	42.9365	0.706104	0	51.4657	0.353052	0.00685994	depleted
NTC	NTC	CATTACGTGTCGAGCTCCGG	88.362	144.894	0.860351	0	116.628	0.430176	0.00368844		KRAS CDE Neutral	GMPS	AGTCATAGACCGAAGAGTGA	137.131	90.8512	0.706104	0.856194	113.991	0.781149	0.00685271	depleted
KRAS CDE Pos	SLC35D3	CCTCAGCCTGCCCATGTACG	34.5475	198.948	0.860351	0	116.748	0.430176	0.00368466		KRAS CDE Neg	LZTFL1	CAAGATTTACAGCTTGATCA	92.1351	32.9802	0	0.856194	62.5577	0.428097	0.00684324	depleted
KRAS CDE Pos	CAPN2	GTACTCGGTCACCGGAGCCG	116.93	0	0.430176	0	58.4651	0.215088	0.00367891		KRAS CDE Neutral	OR3A3	CGCTCTGTGTCAGCTACTTG	287.119	420.031	1.41221	3.42478	353.575	2.41849	0.00684012	depleted
KRAS CDE Pos	TWIST1	AGCGGGTCATGGCCAACGTG	61.1226	107.357	0	0.619709	84.2396	0.309855	0.00367825		KRAS CDE Neutral	TRIM37	GCTAAAGGAGGTCATCTGGA	70.7083	32.9802	0.706104	0	51.8443	0.353052	0.00680986	depleted
KRAS CDE Neutral	CABLES2	GTTGTTGAGGAAGAAAAGCG	89.0264	196.696	0.430176	0.619709	142.861	0.524942	0.0036745		KRAS CDE Pos	ALDH8A1	TGACGTGTGGTGCAGGCTGG	17.1414	190.414	1.41221	0	103.778	0.706104	0.006804	depleted
KRAS CDE Neg	SCN10A	CACATCCCATGGACTCTTGG	287.01	336.334	0.430176	1.85913	311.672	1.14465	0.00367261		KRAS CDE Pos	PTPN5	TGAGGGAGATGAGTCGCAGC	29.9975	74.0499	0.706104	0	52.0237	0.353052	0.00678637	depleted
KRAS CDE Neutral	TIPARP	GATACTCTCTCCATCCAAAG	150.813	135.134	0.430176	0.619709	142.974	0.524942	0.0036716		KRAS CDE Neutral	PRDM11	TGTGTCAGACACAAACACCG	134.989	73.4277	1.41221	0	104.208	0.706104	0.0067759	depleted
KRAS CDE Neutral	FILIP1L	GAGTAAAGACTTTAAACTAG	142.176	261.26	0.860351	0.619709	201.718	0.74003	0.00366864		KRAS CDE Neg	ZNF266	TTGGGGGAGCCAACCTCCAG	130.703	100.185	0.706104	0.856194	115.444	0.781149	0.00676646	depleted
KRAS CDE Neutral	PFKFB2	AAAGCGAGTTCAATCTCTTG	223.895	63.0627	0.430176	0.619709	143.479	0.524942	0.00365868		KRAS CDE Pos	SIAE	TTGAAGCCTGGTCATCTGGA	158.558	407.586	2.11831	1.71239	283.072	1.91535	0.0067663	depleted
KRAS CDE Neutral	PARP8	TGGCACTCCATCCTGAGGAA	182.039	156.906	0	1.23942	169.472	0.619709	0.0036567		KRAS CDE Pos	TNFSF18	TCACCAAACTTAGCCATACA	38.5682	65.9604	0.706104	0	52.2643	0.353052	0.00675513	depleted
KRAS CDE Neutral	ARGFX	TTTCACCCACCAACAGTATG	495.624	698.194	0	4.33796	596.909	2.16898	0.00363369		KRAS CDE Neutral	SLC9B1	GTATGTATTAGTCTGCTGGC	85.7071	145.611	0.706104	0.856194	115.659	0.781149	0.0067539	depleted
KRAS CDE Pos	HOXD1	GCACTGCGCGTACTGGGGCG	152.806	84.0836	0.860351	0	118.445	0.430176	0.00363186		KRAS CDE Neg	UPK1A	GTACCGTGTATACCCACTGA	634.232	524.572	3.53052	4.28097	579.402	3.90575	0.00674099	depleted
KRAS CDE Neg	MMAB	GATGGGCCCCGCCTTGAACG	71.7526	99.0985	0	0.619709	85.4256	0.309855	0.00362719		KRAS CDE Neg	DIRAS2	CCGGGAGAGCTACATCCCGA	74.9937	52.2705	0	0.856194	63.6321	0.428097	0.00672769	depleted
KRAS CDE Neg	DNAJC22	CAACAAATGAAGAAATACAT	207.285	253.752	0.430176	1.23942	230.519	0.834797	0.00362138		KRAS CDE Pos	TNFSF18	GACACCTTATTCACGCAAGG	102.848	129.432	0.706104	0.856194	116.14	0.781149	0.00672592	depleted
KRAS CDE Neg	MMAB	CAGTGCACATTGCAGGACGT	184.032	54.0537	0.860351	0	119.043	0.430176	0.00361362		KRAS CDE Neutral	RAB5I	ACTCCAGACGGAGACTTTGA	70.7083	56.6264	0	0.856194	63.6674	0.428097	0.00672397	depleted
KRAS CDE Neg	RAP1B	CTCGAAGAATCTGTTCTCTC	192.005	217.716	0.860351	0.619709	204.861	0.74003	0.00361236		KRAS CDE Neg	LENG8	AGGGCGCACGGTGGACGGGT	132.846	121.965	0	1.71239	127.405	0.856194	0.00672024	depleted
KRAS CDE Pos	MFSD5	CTGGAGAAGATAATGCCCAG	59.1295	60.0597	0.430176	0	59.5946	0.215088	0.00360918		KRAS CDE Pos	TRIM24	AAGTTTATCAAACGTGGAGG	0	127.565	0	0.856194	63.7825	0.428097	0.00671183	depleted
KRAS CDE Neutral	ELOVL3	CTTGCTGAGAAGAAAGACCC	104.307	67.5672	0	0.619709	85.9371	0.309855	0.0036056		KRAS CDE Neg	STARD6	CTAAGTCGATAAAGTCTCGA	156.415	76.539	0.706104	0.856194	116.477	0.781149	0.00670646	depleted
KRAS CDE Neg	CFLAR	TATAGTCCGAAACAAGGTGA	89.6907	149.399	0.860351	0	119.545	0.430176	0.00359845		KRAS CDE Neg	RTN4RL1	GTAGCTGCGGAGCTGCCCCT	222.838	288.11	0	3.42478	255.474	1.71239	0.00670278	depleted
KRAS CDE Pos	TMEM246	CATGCTCTTCCCGGCACCTG	89.0264	83.3328	0	0.619709	86.1796	0.309855	0.00359545		KRAS CDE Neg	CPAMD8	GCCTCCAGCATAGGACAAGA	113.562	354.071	1.41221	1.71239	233.816	1.5623	0.00668174	depleted
KRAS CDE Neutral	POGK	CAGAGCCGGGAACTAGAGGA	77.0676	95.3448	0	0.619709	86.2062	0.309855	0.00359434		KRAS CDE Neg	CD2BP2	ATGGTCTGGTGGATGTGATG	242.122	203.482	2.11831	0.856194	222.802	1.48725	0.00667522	depleted
KRAS CDE Pos	MTF2	AGTGCTGCAAATGTAAGCAG	256.449	155.404	0.860351	0.619709	205.927	0.74003	0.00359366		NTC	NTC	ACGCGAAGTGTCGCAGAGTG	64.2803	64.7159	0	0.856194	64.4981	0.428097	0.00663736	depleted
KRAS CDE Neg	SCN10A	TTCGAACCCTTCGCGCTCTG	99.6564	72.8224	0	0.619709	86.2394	0.309855	0.00359296		KRAS CDE Neg	WASF3	GGTGTCAGGATGTTCAGAGG	134.989	100.807	0.706104	0.856194	117.898	0.781149	0.00662563	depleted
KRAS CDE Pos	MEOX2	CCGCAGGTGACAGTGCCTGG	243.162	168.918	0.860351	0.619709	206.04	0.74003	0.00359169		KRAS CDE Pos	SPSB4	CGGCAAGAACCAGCCCGGCG	128.561	236.462	0.706104	1.71239	182.511	1.20925	0.0066256	depleted
KRAS CDE Neg	SLC2A13	CTACAGCTACTACTATCCCA	93.0126	79.5791	0	0.619709	86.2959	0.309855	0.00359061		KRAS CDE Pos	TWIST1	GACCGGCAGCAGCCGCCGAG	83.5644	23.0239	0.706104	0	53.2942	0.353052	0.00662459	depleted
KRAS CDE Pos	MAP2K2	CCACCTCCTAAGCTGCCCAA	432.509	445.193	1.29053	1.85913	438.851	1.57483	0.00358853		KRAS CDE Pos	INPP5F	TTTGGCTTACCAAAAAGAGT	68.5656	38.5806	0.706104	0	53.5731	0.353052	0.00659009	depleted
KRAS CDE Pos	CDHR2	CCTCTCGTAGTCCACCAGCG	73.7457	99.0985	0	0.619709	86.4221	0.309855	0.00358536		KRAS CDE Pos	PDZD8	AGCGCAGCCTTCCCACCACG	199.269	276.909	1.41221	1.71239	238.089	1.5623	0.00656182	depleted
KRAS CDE Pos	SCLY	GGTGCCGGCGCATCCCTCCC	73.7457	99.0985	0	0.619709	86.4221	0.309855	0.00358536		KRAS CDE Pos	GRPEL2	AAGGCTCGTTCAGCAAGAGG	0	107.652	0.706104	0	53.8262	0.353052	0.00655911	depleted
KRAS CDE Pos	ALPP	CCCTCCTGGCGGGCGGAGGC	101.65	71.3209	0	0.619709	86.4852	0.309855	0.00358275		KRAS CDE Neg	PIEZO1	CTTCACGGCCCAGGCCTATG	57.8523	72.8054	0	0.856194	65.3288	0.428097	0.00655296	depleted
KRAS CDE Neutral	ISL2	TACCGGGCAGATGCAGGCCG	58.4651	114.864	0	0.619709	86.6646	0.309855	0.00357533		KRAS CDE Neg	OSTC	GGATATTTGGTGCATTCGAT	25.7121	82.1394	0.706104	0	53.9258	0.353052	0.006547	depleted
KRAS CDE Neutral	DNAJC6	CTTTATCTGGGTGCACCACC	328.866	326.575	1.7207	0.619709	327.72	1.17021	0.00357075		KRAS CDE Pos	TNFSF9	GGCCAGCCCGAGACTCCGCG	132.846	237.084	0.706104	1.71239	184.965	1.20925	0.0065377	depleted
KRAS CDE Neg	CHID1	TAGAGTAGTCGTAGGTCATG	271.065	196.696	0.430176	1.23942	233.88	0.834797	0.00356933		KRAS CDE Neg	ZMYND15	GTTAAATCCTGCAGACAGAG	207.84	140.01	1.41221	0.856194	173.925	1.1342	0.00652121	depleted
KRAS CDE Neutral	C14orf93	GGGAGCTGAGACACTCTCTA	239.175	108.107	0	1.23942	173.641	0.619709	0.0035689		KRAS CDE Neutral	LEO1	TCAGATGTAGATCAGCACAG	130.703	85.873	1.41221	0	108.288	0.706104	0.0065206	depleted
KRAS CDE Neg	TLN2	TGCACGGACAAGATTGTCTG	164.101	130.63	0.430176	0.619709	147.365	0.524942	0.00356218		KRAS CDE Neg	CPAMD8	GCCGGTGCCTGACGTGCGTG	460.675	566.886	0.706104	5.99336	513.781	3.34973	0.00651977	depleted
KRAS CDE Pos	CCDC7	TATGGACATTGCGATCAGAA	237.847	125.375	1.29053	0	181.611	0.645263	0.00355301		KRAS CDE Neg	C2orf16	GACCTTCAGAGCACCACACA	224.981	208.46	2.82442	0	216.72	1.41221	0.00651627	depleted
KRAS CDE Neg	TRIM49C	ATACAGAAAGATATCACTGT	185.361	110.36	0.430176	0.619709	147.86	0.524942	0.00355026		KRAS CDE Neutral	SOHLH2	GGAGCCTTCCGTGATGGTGT	51.4242	57.2487	0.706104	0	54.3365	0.353052	0.00649752	depleted
KRAS CDE Neg	POLR1E	GCTGCATCATCATAGCAGGG	83.047	91.591	0	0.619709	87.319	0.309855	0.00354854		KRAS CDE Neutral	SLC1A2	CCATGGCTCTCGTGCCCAAG	34.2828	74.6722	0.706104	0	54.4775	0.353052	0.00648069	depleted
KRAS CDE Pos	GRPEL2	TGCTTACTTGCTCTCCCACG	107.629	135.134	0.860351	0	121.382	0.430176	0.00354399		KRAS CDE Neg	VAPA	GATGCACCCCAATTTCAAAG	49.2816	59.7378	0.706104	0	54.5097	0.353052	0.00647687	depleted
KRAS CDE Pos	TWIST1	TGTACCTGGCCGCCAGCTTG	101.65	141.14	0.860351	0	121.395	0.430176	0.00354361		KRAS CDE Pos	DEPDC1B	AAAAGATGAAATGTAAGTAG	6.42803	102.674	0.706104	0	54.5511	0.353052	0.00647194	depleted
KRAS CDE Pos	FRMD3	TTATCTTCCTCTTCACTAGG	264.422	86.3358	0	1.23942	175.379	0.619709	0.00353355		KRAS CDE Neutral	HADHA	CACCTGGTAGTATAGAAGCC	201.412	172.991	0.706104	1.71239	187.201	1.20925	0.00645961	depleted
KRAS CDE Neg	BZW1	TATCCAACTTTAGCCCCAGG	107.629	135.885	0.860351	0	121.757	0.430176	0.00353307		KRAS CDE Neutral	ACTRT3	ATGGTGCTAATGAAGAACCA	38.5682	203.482	0.706104	0.856194	121.025	0.781149	0.00645445	depleted
[truncated: 1,216 more rows]

## Sheet: B_CRISPRi
KRAS wildtype												KRAS mutant
[truncated: 5,862 more rows]
