# Supplementary material for: A systematic genome-wide mapping of oncogenic mutation selection during CRISPR-Cas9 genome editing
Source: Research Square preprint supplement (doi:10.21203/rs.3.rs-199044/v1), 2021-02-10
Supplement: Supplementary file 7 [file 9035b0b1d88175c6ed530217.xlsx]

## Sheet: A
Gene	Replicate #	Day 0	Day 5	Day 10	Day 14	Day 20	Day 25
NDUFB10	1	7.08	3.15	3.89	6.71	14	13.7
NDUFB10	2	7.37	4.08	3.81	8.06	7.85	7.1
NDUFB10	3	7.31	3.23	3.41	1.84	9.63	32.4
NDUFB10	4	7.89	3.05	2.31	3.82	9.04	8.54
NDUFB10	1	5.09	2.57	6.38	2.5	0.87	6.16
NDUFB10	2	11.3	5.62	5.69	8.91	17.7	14.8
NDUFB10	3	5.4	2.61	5.24	2.76	8.93	9.45
NDUFB10	4	5.84	2.07	3.18	3.16	4.5	6.74
NDUFB6	1	5.53	2.88	5.88	8.51	23.5	44.1
NDUFB6	1	9.15	2.63	5.52	9.96	8.29	11.3
ANKRD49	1	6.81	1.28	0.47	1.2	1.04	2.6
ANKRD49	2	6.15	1.9	1.21	1.27	1.59	3.73
ANKRD49	3	8.76	1.11	0.63	0.78	1.78	3.52
ANKRD49	4	7.88	1.73	0.53	0.62	1.54	4.74
ANKRD49	1	6.58	1.45	0.45	0.88	1.77	5.42
ANKRD49	2	7.45	1.4	0.57	0.83	1.78	4.27
ANKRD49	3	6.03	1.09	0.49	0.75	2.09	4.64
ANKRD49	4	6.65	1.53	0.82	0.8	2.02	4.33
NTC	1	3.7	0.69	0.53	1.24	1.76	4.18
NTC	1	3.27	0.86	0.71	1.5	2.2	4.63
FANCG	1	7.52	1.53	0.62	0.63	1.73	5.66
FANCG	2	5.87	1.78	0.76	1.27	1	3.93
FANCG	3	3.99	1.31	0.87	1.05	0.72	4.73
FANCG	1	6.56	2.49	0.81	0.81	0.89	4.08
FANCG	2	4.56	1.39	0.94	0.87	0.79	4.09
FANCG	3	4.07	1.77	0.81	1.09	1.05	4.97
TFAP4	1	6.67	2.82	1.09	0.55	1.04	5.27
TFAP4	2	5.52	2.13	0.81	0.68	1.23	6.23
TFAP4	1	6.86	3.92	1.37	0.85	1.6	6.28
TFAP4	2	4.81	3.2	1.04	0.79	0.83	4.5

## Sheet: B
Gene	Timepoint (Day)	%TdTomato (%p53-mutant)	Replicate #	sgRNA #	sgRNA sequence
AKR1C1	0	7.85	1	1	AGTGGATCTCTGTGCCACAT
AKR1C1	0	13.5	2	1	AGTGGATCTCTGTGCCACAT
AKR1C1	5	1.63	1	1	AGTGGATCTCTGTGCCACAT
AKR1C1	5	2.49	2	1	AGTGGATCTCTGTGCCACAT
AKR1C1	10	3.78	1	1	AGTGGATCTCTGTGCCACAT
AKR1C1	10	4.51	2	1	AGTGGATCTCTGTGCCACAT
AKR1C1	15	4.99	1	1	AGTGGATCTCTGTGCCACAT
AKR1C1	15	8.72	2	1	AGTGGATCTCTGTGCCACAT
ANKRD49	0	8.28	1	1	CAAAGACTTTGAGTACCAGT
ANKRD49	0	5.17	2	1	AGGCAATTCTGATGAAGATG
ANKRD49	0	6.92	1	2	AAAGTGTTCAGAAAAATCCA
ANKRD49	0	5.77	2	2	AGGCAATTCTGATGAAGATG
ANKRD49	0	12.2	1	3	GTGTTTCCAACAATTCAAGT
ANKRD49	0	9.52	2	3	AAAGTGTTCAGAAAAATCCA
ANKRD49	0	15.2	1	4	CAAAGACTTTGAGTACCAGT
ANKRD49	0	17.1	2	4	GTGTTTCCAACAATTCAAGT
ANKRD49	5	2.07	1	1	CAAAGACTTTGAGTACCAGT
ANKRD49	5	15.5	2	1	CAAAGACTTTGAGTACCAGT
ANKRD49	5	1.88	1	2	AGGCAATTCTGATGAAGATG
ANKRD49	5	3.56	2	2	AGGCAATTCTGATGAAGATG
ANKRD49	5	1.66	1	3	AAAGTGTTCAGAAAAATCCA
ANKRD49	5	15.6	2	3	AAAGTGTTCAGAAAAATCCA
ANKRD49	5	2.16	1	4	GTGTTTCCAACAATTCAAGT
ANKRD49	5	11.7	2	4	GTGTTTCCAACAATTCAAGT
ANKRD49	10	1.1	1	1	CAAAGACTTTGAGTACCAGT
ANKRD49	10	11.8	2	1	CAAAGACTTTGAGTACCAGT
ANKRD49	10	1.06	1	2	AGGCAATTCTGATGAAGATG
ANKRD49	10	10.2	2	2	AGGCAATTCTGATGAAGATG
ANKRD49	10	0.76	1	3	AAAGTGTTCAGAAAAATCCA
ANKRD49	10	20.6	2	3	AAAGTGTTCAGAAAAATCCA
ANKRD49	10	1.43	1	4	GTGTTTCCAACAATTCAAGT
ANKRD49	10	8.73	2		GTGTTTCCAACAATTCAAGT
ANKRD49	15	22.1	1	1	CAAAGACTTTGAGTACCAGT
ANKRD49	15	33.3	2	1	CAAAGACTTTGAGTACCAGT
ANKRD49	15	22.1	1	2	CAAAGACTTTGAGTACCAGT
ANKRD49	15	27.1	2	2	AGGCAATTCTGATGAAGATG
ANKRD49	15	16.4	1	3	AAAGTGTTCAGAAAAATCCA
ANKRD49	15	26.4	2	3	AAAGTGTTCAGAAAAATCCA
ANKRD49	15	13.1	1	4	GTGTTTCCAACAATTCAAGT
ANKRD49	15	23.6	2	4	GTGTTTCCAACAATTCAAGT
DLAT	0	5.3	1	1	ACTTGTTGCTGAAGGTACCA
DLAT	0	4	2	1	ACTTGTTGCTGAAGGTACCA
DLAT	5	1.43	1	1	ACTTGTTGCTGAAGGTACCA
DLAT	5	3.24	2	1	ACTTGTTGCTGAAGGTACCA
DLAT	10	1.01	1	1	ACTTGTTGCTGAAGGTACCA
DLAT	10	5.11	2	1	ACTTGTTGCTGAAGGTACCA
DLAT	15	5.42	1	1	ACTTGTTGCTGAAGGTACCA
DLAT	15	35.4	2	1	ACTTGTTGCTGAAGGTACCA
FANCG	0	4.76	1	1	ACGGTCAGCACTCAACCAGA
FANCG	0	5.61	2	1	ACGGTCAGCACTCAACCAGA
FANCG	0	9.65	1	2	GAAGAACAGGAACAGCTGCA
FANCG	0	6.56	2	2	GAAGAACAGGAACAGCTGCA
FANCG	0	11.6	1	3	TGGCCCGGAAGAGCAGCTCG
FANCG	0	12.1	2	3	TGGCCCGGAAGAGCAGCTCG
FANCG	5	2.88	1	1	ACGGTCAGCACTCAACCAGA
FANCG	5	4.7	2	1	ACGGTCAGCACTCAACCAGA
FANCG	5	4.37	1	2	GAAGAACAGGAACAGCTGCA
FANCG	5	9.52	2	2	GAAGAACAGGAACAGCTGCA
FANCG	5	12.2	1	3	ACGGTCAGCACTCAACCAGA
FANCG	5	16	2	3	TGGCCCGGAAGAGCAGCTCG
FANCG	10	0.17	1	1	ACGGTCAGCACTCAACCAGA
FANCG	10	4	2	1	ACGGTCAGCACTCAACCAGA
FANCG	10	1.18	1	2	GAAGAACAGGAACAGCTGCA
FANCG	10	2.8	2	2	CAGCCTGCAGGCCAACCAGG
FANCG	10	1.46	1	3	TGGCCCGGAAGAGCAGCTCG
FANCG	10	3	2	3	TGGCCCGGAAGAGCAGCTCG
FANCG	15	21.4	1	1	ACGGTCAGCACTCAACCAGA
FANCG	15	38	2	1	ACGGTCAGCACTCAACCAGA
FANCG	15		1	2
FANCG	15	27.1	2	2	GAAGAACAGGAACAGCTGCA
FANCG	15		1	3
FANCG	15	19.1	2	3	TGGCCCGGAAGAGCAGCTCG
FGFR1OP	0	3.83	1	1	GAGAAAAGTGAGATAAGTAT
FGFR1OP	0	6.25	2	1	GAGAAAAGTGAGATAAGTAT
FGFR1OP	5	2.86	1	1	GAGAAAAGTGAGATAAGTAT
FGFR1OP	5	1.54	2	1	GAGAAAAGTGAGATAAGTAT
FGFR1OP	10	4	1	1	GAGAAAAGTGAGATAAGTAT
FGFR1OP	10	1.72	2	1	GAGAAAAGTGAGATAAGTAT
FGFR1OP	15	7.72	1	1	GAGAAAAGTGAGATAAGTAT
FGFR1OP	15	20.9	2	1	GAGAAAAGTGAGATAAGTAT
GATA2DA	0	6.79	2	1	GACCCGGCATTGCCGCCCAG
GATA2DA	0	11.6	1	3	GACCCGGCATTGCCGCCCAG
GATA2DA	5	2.57	1	1	GACCCGGCATTGCCGCCCAG
GATA2DA	5	2.21	2	1	GACCCGGCATTGCCGCCCAG
GATA2DA	10	2.02	1	1	GACCCGGCATTGCCGCCCAG
GATA2DA	10	2.29	2	1	GACCCGGCATTGCCGCCCAG
GATA2DA	15	7.47	1	1	GACCCGGCATTGCCGCCCAG
GATA2DA	15	3.33	2	1	GACCCGGCATTGCCGCCCAG
IFNA13	0	5.72	1	1	CGGTGCAGAATTTGTCTAGG
IFNA13	0	5.74	2	1	CGGTGCAGAATTTGTCTAGG
IFNA13	5	0.86	1	1	CGGTGCAGAATTTGTCTAGG
IFNA13	5	10.7	2	1	CGGTGCAGAATTTGTCTAGG
IFNA13	10	1.51	1	1	CGGTGCAGAATTTGTCTAGG
IFNA13	10	5.38	2	1	CGGTGCAGAATTTGTCTAGG
IFNA13	15	20.1	1	1	CGGTGCAGAATTTGTCTAGG
IFNA13	15	24.2	2	1	CGGTGCAGAATTTGTCTAGG
NDUFB10	0	7.69	1	1	TCACGGGTCGGTCCACGATG
NDUFB10	0	7.27	2	1	TCACGGGTCGGTCCACGATG
NDUFB10	0	11.8	2	2	ACAGGTATTACTACTACCAC
NDUFB10	0	11.9	1	2	ACAGGTATTACTACTACCAC
NDUFB10	0	5.29	1	3	CAGTGATGTCTGGCACGCGG
NDUFB10	0	5.02	2	3	CAGTGATGTCTGGCACGCGG
NDUFB10	0	9.52	2	4	AGACATCACTGAGTGCAAGG
NDUFB10	0	8.41	1	4	AGACATCACTGAGTGCAAGG
NDUFB10	5	1.57	1	1	TCACGGGTCGGTCCACGATG
NDUFB10	5	4.21	1	2	ACAGGTATTACTACTACCAC
NDUFB10	5	1.22	1	3	CAGTGATGTCTGGCACGCGG
NDUFB10	5	1.65	1	4	AGACATCACTGAGTGCAAGG
NDUFB10	5	3.35	2	1	TCACGGGTCGGTCCACGATG
NDUFB10	5	6.93	2	2	ACAGGTATTACTACTACCAC
NDUFB10	5	2.04	2	3	CAGTGATGTCTGGCACGCGG
NDUFB10	5	3.65	2	4	AGACATCACTGAGTGCAAGG
NDUFB10	10	2.25	1	1	TCACGGGTCGGTCCACGATG
NDUFB10	10	1.76	2	1	TCACGGGTCGGTCCACGATG
NDUFB10	10	2.76	1	2	ACAGGTATTACTACTACCAC
NDUFB10	10	0.81	2	2	ACAGGTATTACTACTACCAC
NDUFB10	10	1.87	1	3	CAGTGATGTCTGGCACGCGG
NDUFB10	10	2.99	2	3	CAGTGATGTCTGGCACGCGG
NDUFB10	10	2.79	1	4	AGACATCACTGAGTGCAAGG
NDUFB10	10	3.28	2	4	AGACATCACTGAGTGCAAGG
NDUFB10	15	20.2	1	1	TCACGGGTCGGTCCACGATG
NDUFB10	15	25.9	2	1	ACAGGTATTACTACTACCAC
NDUFB10	15		1	2
NDUFB10	15	14.6	2	2	ACAGGTATTACTACTACCAC
NDUFB10	15	10.9	1	3	CAGTGATGTCTGGCACGCGG
NDUFB10	15	21.8	2	3	CAGTGATGTCTGGCACGCGG
NDUFB10	15	12	1	4	AGACATCACTGAGTGCAAGG
NDUFB10	15	16.6	2	4	AGACATCACTGAGTGCAAGG
NDUFB6	0	7.19	1	1	GTACCAGCGGCGACATGACG
NDUFB6	0	6.11	2	1	GTACCAGCGGCGACATGACG
NDUFB6	5	1.63	1	1	GTACCAGCGGCGACATGACG
NDUFB6	5	2.17	2	1	GTACCAGCGGCGACATGACG
NDUFB6	10	1.98	1	1	GTACCAGCGGCGACATGACG
NDUFB6	10	1.86	2	1	GTACCAGCGGCGACATGACG
NDUFB6	15	21.2	1	1	GTACCAGCGGCGACATGACG
NDUFB6	15	23.8	2	1	GTACCAGCGGCGACATGACG
NTAN1	0	39.4	2	1	GAGACAGAACAACTTCGTAT
NTAN1	0	12	1	1	GAGACAGAACAACTTCGTAT
NTAN1	5	2.52	1	1	GAGACAGAACAACTTCGTAT
NTAN1	5	7.58	2	1	GAGACAGAACAACTTCGTAT
NTAN1	10	3.48	1	1	GAGACAGAACAACTTCGTAT
NTAN1	10	7.9	2	1	GAGACAGAACAACTTCGTAT
NTAN1	15	1.79	1	1	GAGACAGAACAACTTCGTAT
NTAN1	15	4.37	2	1	GAGACAGAACAACTTCGTAT
NTC	0	2.97	1	1	TCACACGGGATCTCGCCGGT
NTC	0	1.32	2	1	TCACACGGGATCTCGCCGGT
NTC	5	2.9	1	1	TCACACGGGATCTCGCCGGT
NTC	5	1.87	2	1	TCACACGGGATCTCGCCGGT
NTC	10	1.42	1	1	TCACACGGGATCTCGCCGGT
NTC	10	1.53	2	1	TCACACGGGATCTCGCCGGT
NTC	15	12.1	1	1	TCACACGGGATCTCGCCGGT
NTC	15	9.12	2	1	TCACACGGGATCTCGCCGGT
PIM3	0	5.21	1	1	GACTGGTTCGAGCGGCCCGA
PIM3	0	22.7	2	1	GACTGGTTCGAGCGGCCCGA
PIM3	5	1.99	1	1	GACTGGTTCGAGCGGCCCGA
PIM3	5	12.7	2	1	GACTGGTTCGAGCGGCCCGA
PIM3	10	1.73	1	1	GACTGGTTCGAGCGGCCCGA
PIM3	10	6.51	2	1	GACTGGTTCGAGCGGCCCGA
PIM3	15	20.5	1	1	GACTGGTTCGAGCGGCCCGA
PIM3	15	12.1	2	1	GACTGGTTCGAGCGGCCCGA
RAB26	0	14.5	1	1	GGCCGGCCCTCGCTTGGCGG
RAB26	0	7.39	2	1	GGCCGGCCCTCGCTTGGCGG
RAB26	0	25	1	2	CAAGGATGGTGCTTTCCTGG
RAB26	0	13.3	2	2	CAAGGATGGTGCTTTCCTGG
RAB26	5	3.93	1	1	CAAGGATGGTGCTTTCCTGG
RAB26	5	4.81	2	1	CAAGGATGGTGCTTTCCTGG
RAB26	5	1.36	1	2	GGCCGGCCCTCGCTTGGCGG
RAB26	5	4.26	2	2	GGCCGGCCCTCGCTTGGCGG
RAB26	10	1.71	1	1	CAAGGATGGTGCTTTCCTGG
RAB26	10	4.86	2	1	CAAGGATGGTGCTTTCCTGG
RAB26	10	3.89	1	2	GGCCGGCCCTCGCTTGGCGG
RAB26	10	7.07	2	2	GGCCGGCCCTCGCTTGGCGG
RAB26	15	3.3	1	1	CAAGGATGGTGCTTTCCTGG
RAB26	15	3.35	2	1	GGCCGGCCCTCGCTTGGCGG
RAB26	15	16.3	1	2	GGCCGGCCCTCGCTTGGCGG
RAB26	15	7.95	2	2	CAAGGATGGTGCTTTCCTGG
SRFBP1	0	12.5	1	1	ATGTCTGAAGATAGTGATAG
SRFBP1	0	12.7	2	1	ATGTCTGAAGATAGTGATAG
SRFBP1	5	18	1	1	ATGTCTGAAGATAGTGATAG
SRFBP1	5	8.78	2	1	ATGTCTGAAGATAGTGATAG
SRFBP1	10	0.99	1	1	ATGTCTGAAGATAGTGATAG
SRFBP1	10	4.27	2	1	ATGTCTGAAGATAGTGATAG
SRFBP1	15	19.4	1	1	ATGTCTGAAGATAGTGATAG
SRFBP1	15	4.95	2	1	ATGTCTGAAGATAGTGATAG
TMX1	0	4.17	1	1	TTGACAAGCAGGGCACCACG
TMX1	0	4.55	2	1	TTGACAAGCAGGGCACCACG
TMX1	5	6.03	1	1	TTGACAAGCAGGGCACCACG
TMX1	5	6.8	2	1	TTGACAAGCAGGGCACCACG
TMX1	10	3.95	1	1	TTGACAAGCAGGGCACCACG
TMX1	10	0.99	2	1	TTGACAAGCAGGGCACCACG
TMX1	15	21.1	1	1	TTGACAAGCAGGGCACCACG
TMX1	15	15.4	2	1	TTGACAAGCAGGGCACCACG
TNFAIP	0	7.69	1	1	GCTTCTCTCCGTCTGTGTGG
TNFAIP	0	10.9	2	1	GCTTCTCTCCGTCTGTGTGG
TNFAIP	0	10.6	1	2	AGATCGCCAACAGCAACGAG
TNFAIP	0	6.85	2	2	AGATCGCCAACAGCAACGAG
TNFAIP	5	7.61	1	1	GCTTCTCTCCGTCTGTGTGG
TNFAIP	5	3.47	2	1	GCTTCTCTCCGTCTGTGTGG
TNFAIP	5	9.89	2	2	AGATCGCCAACAGCAACGAG
TNFAIP	10	2.53	1	1	GCTTCTCTCCGTCTGTGTGG
TNFAIP	10	0.97	2	1	GCTTCTCTCCGTCTGTGTGG
TNFAIP	10	12.8	2	2	AGATCGCCAACAGCAACGAG
TNFAIP	15	28.6	1	1	GCTTCTCTCCGTCTGTGTGG
TNFAIP	15	41.2	2	1	GCTTCTCTCCGTCTGTGTGG
TNFAIP	15	48.9	1	2	AGATCGCCAACAGCAACGAG
TUBE1	0	10.3	1	1	GACACGAGATAATGAAGTTG
TUBE1	0	4.35	2	1	GACACGAGATAATGAAGTTG
TUBE1	5	8.93	1	1	GACACGAGATAATGAAGTTG
TUBE1	5	5.38	2	1	GACACGAGATAATGAAGTTG
TUBE1	10	7.33	1	1	GACACGAGATAATGAAGTTG
TUBE1	10	1.3	2	1	GACACGAGATAATGAAGTTG
TUBE1	15	2.39	1	1	GACACGAGATAATGAAGTTG
TUBE1	15	36	2	1	GACACGAGATAATGAAGTTG
ZFN425	0	8.37	1	1	GGGAATTTCTAAGCGCCCTG
ZFN425	0	13.3	2	1	GGGAATTTCTAAGCGCCCTG
ZFN425	5	2.55	1	1	GGGAATTTCTAAGCGCCCTG
ZFN425	5	3.58	2	1	GGGAATTTCTAAGCGCCCTG
ZFN425	10	1.63	1	1	GGGAATTTCTAAGCGCCCTG
ZFN425	10	1.45	2	1	GGGAATTTCTAAGCGCCCTG
ZFN425	15	9.06	1	1	GGGAATTTCTAAGCGCCCTG
ZFN425	15	13.4	2	1	GGGAATTTCTAAGCGCCCTG
ZMYND8	0	7.89	1	1	GCAGACAGCCACCACTACCA
ZMYND8	0	14.3	2	1	GCAGACAGCCACCACTACCA
ZMYND8	5	3.7	1	1	GCAGACAGCCACCACTACCA
ZMYND8	5	19.5	2	1	GCAGACAGCCACCACTACCA
ZMYND8	10	3.18	1	1	GCAGACAGCCACCACTACCA
ZMYND8	10	7.84	2	1	GCAGACAGCCACCACTACCA
ZMYND8	15	9.13	1	1	GCAGACAGCCACCACTACCA
ZMYND8	15	23.1	2	1	GCAGACAGCCACCACTACCA
